# Supplementary material for: Comparative genome analysis of programmed DNA elimination in nematodes
Source: PubMed Central journal article supplement — Genome Res. 2017 Dec;27(12):2001–14. doi: 10.1101/gr.225730.117 (PMC5741062; doi:10.1101/gr.225730.117), 2017-12
Supplement: supp_gr.225730.117_Supplemental_Fig_S3.pdf [file supp_gr.225730.117_Supplemental_Fig_S3.pdf]

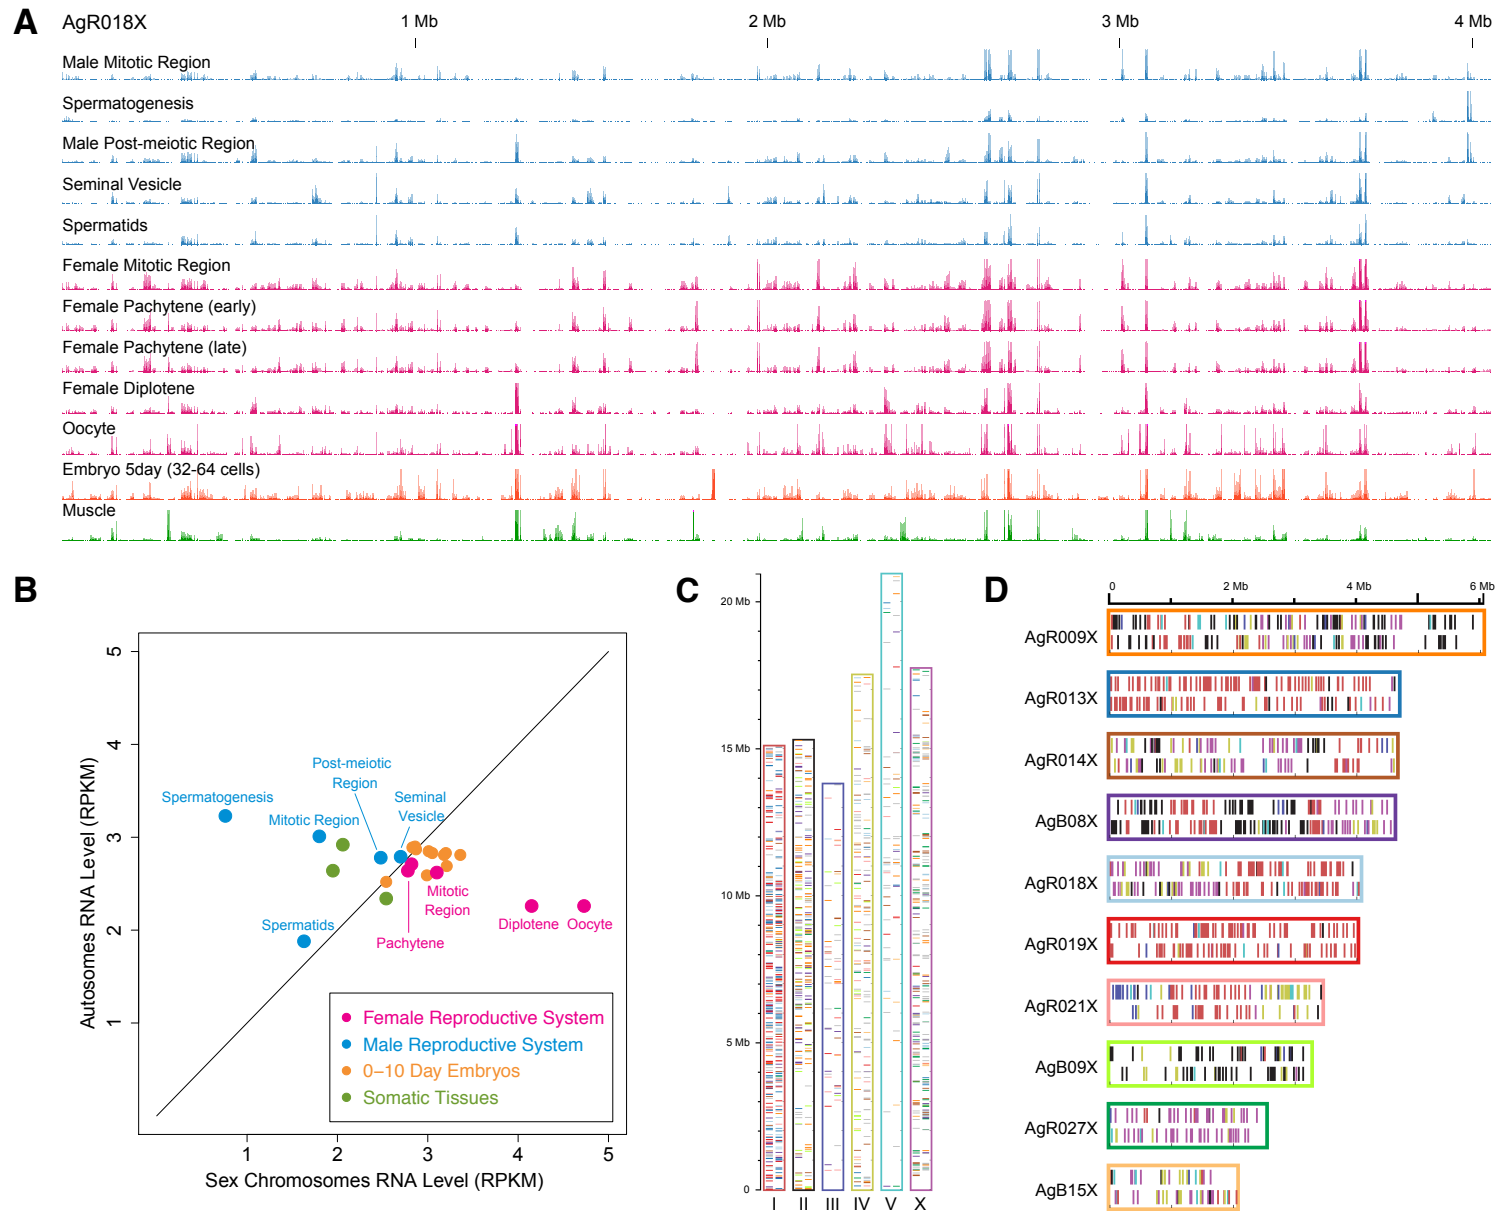

**Figure S3. *Ascaris* sex chromosomes.** **A.** Meiotic sex chromosome inactivation during *Ascaris* spermatogenesis. RNA expression during *Ascaris* gametogenesis for one sex chromosome is illustrated. Note RNA expression (measured by RNA-seq) is silenced during *Ascaris* spermatogenesis (second track). **B.** RNA expression for autosomes and sex chromosomes during development. For the 25 indicated developmental stages (see also Fig. 2D), the average RNA expression for all sex chromosomes and autosomes are compared. Stages closer to the diagonal line indicate a more balanced expression in the autosomes and sex chromosomes. **C.** Mapping *Ascaris* sex chromosome sequences onto *C. elegans* chromosomes. *Ascaris* X chromosome sequences map primarily to *C. elegans* Chr I, II, and X. **D.** *C. elegans* genes mapped onto *Ascaris* sex chromosomes.
