# Supplementary material for: Comparative genome analysis of programmed DNA elimination in nematodes
Source: PubMed Central journal article supplement — Genome Res. 2017 Dec;27(12):2001–14. doi: 10.1101/gr.225730.117 (PMC5741062; doi:10.1101/gr.225730.117), 2017-12
Supplement: supp_gr.225730.117_Supplemental_Fig_S4.pdf [file supp_gr.225730.117_Supplemental_Fig_S4.pdf]

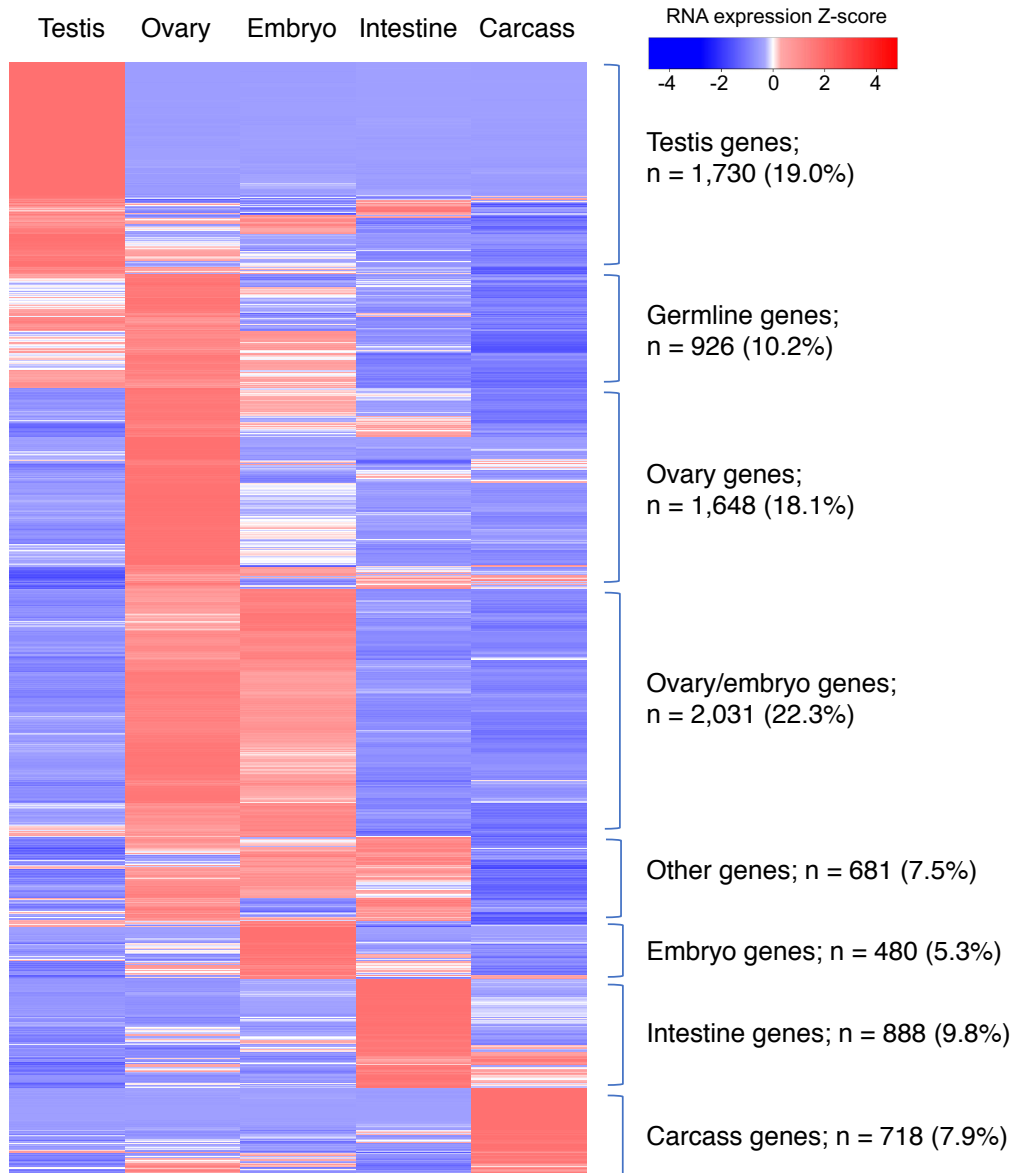

**Figure S4. *Parascaris* RNA expression during development.** The heatmap shows the expression of 9,102 genes (with average rpk  $\geq 5$  or max rpk  $\geq 20$ ) across 5 different developmental stages in *Parascaris*. Testis, male reproductive system; ovary, female reproductive system; embryo, mixed embryos from 1-cell to larvae L1; intestine, male intestine; and male carcass which includes muscle, hypodermis, pharynx, and neurons after the testis, spermatids, and intestine were removed.
