# Supplementary material for: Comparative genome analysis of programmed DNA elimination in nematodes
Source: PubMed Central journal article supplement — Genome Res. 2017 Dec;27(12):2001–14. doi: 10.1101/gr.225730.117 (PMC5741062; doi:10.1101/gr.225730.117), 2017-12
Supplement: supp_gr.225730.117_Supplemental_Fig_S5.pdf [file supp_gr.225730.117_Supplemental_Fig_S5.pdf]

Genome synteny between *Ascaris* and *Parascaris*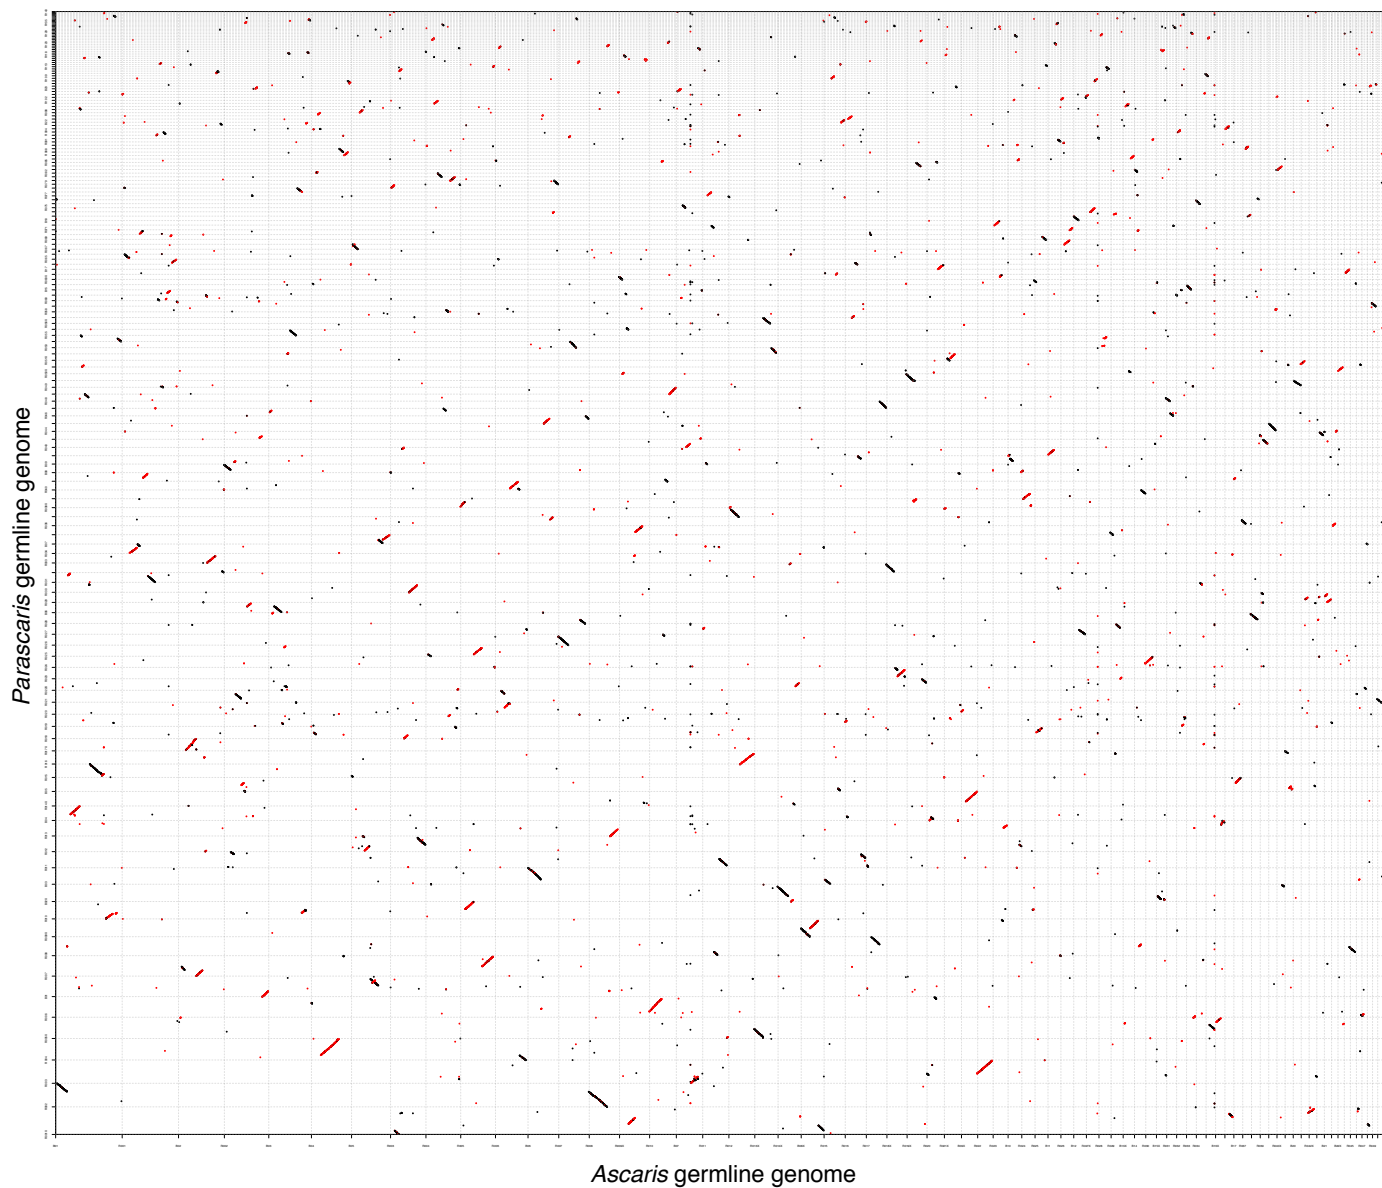

**Figure S5. Genome synteny between *Ascaris* and *Parascaris*.** *Ascaris* and *Parascaris* scaffold (with length  $\geq$  N90) compared by dotplot analysis. Blastp was used to compare the proteomes of both nematode scaffolds. Only the best reciprocal hits are illustrated. Red dots represent forward matches while black ones indicate reverse matches.
