# Supplementary material for: Comparative genome analysis of programmed DNA elimination in nematodes
Source: PubMed Central journal article supplement — Genome Res. 2017 Dec;27(12):2001–14. doi: 10.1101/gr.225730.117 (PMC5741062; doi:10.1101/gr.225730.117), 2017-12
Supplement: supp_gr.225730.117_Supplemental_Fig_S6.pdf [file supp_gr.225730.117_Supplemental_Fig_S6.pdf]

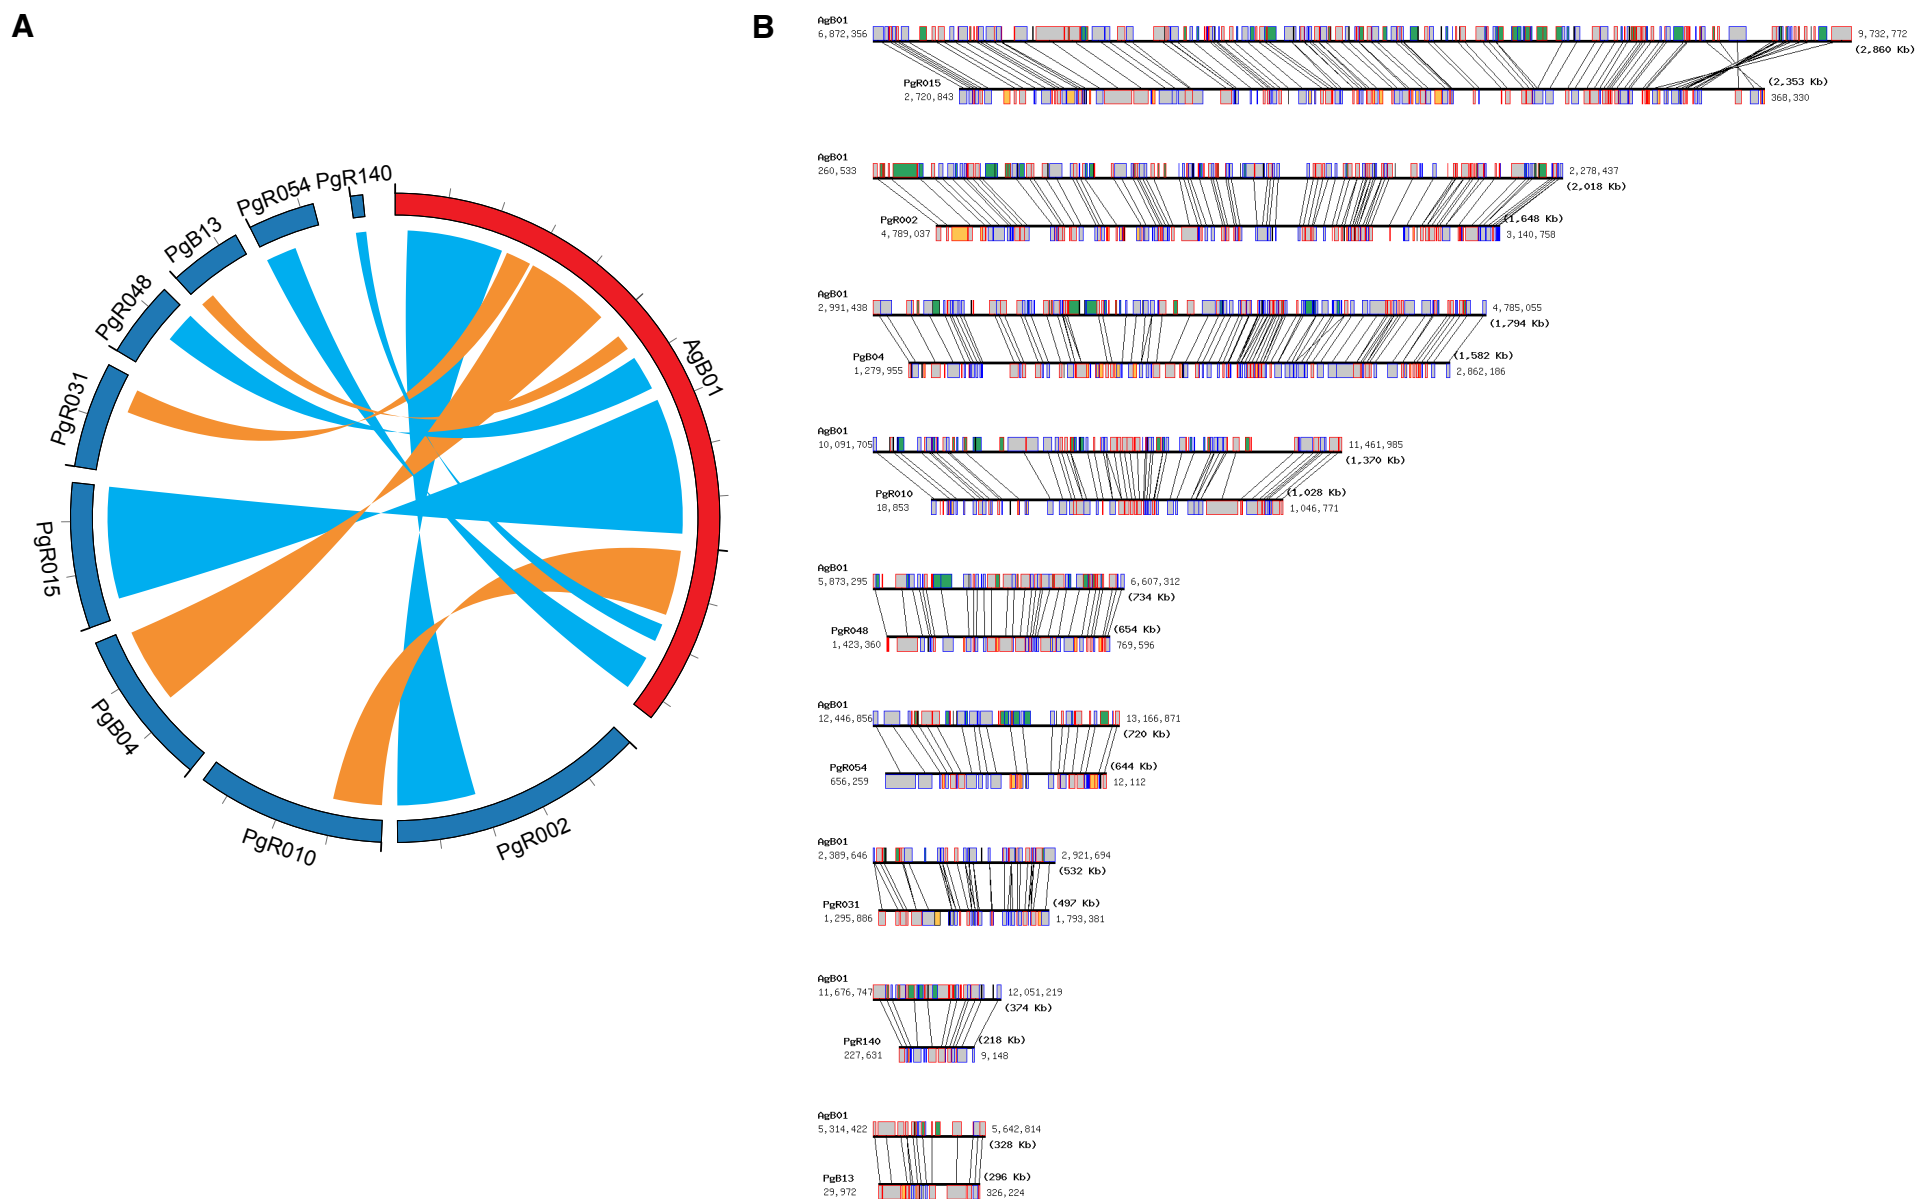

**Figure S6. Examples of *Ascaris* and *Parascaris* synteny.** **A.** Comparison of the *Parascaris* genome to the largest assembled *Ascaris* scaffold (AgB01). Only large (> 300 kb) syntenic blocks are shown. Orange ribbons indicate forward matches while blue ribbons indicate reverse matches. **B.** Alignment of *Ascaris* and *Parascaris* genes for all the syntenic blocks. Boxes with red and blue borders indicate genes transcribed from the forward and reverse strand, respectively. Gene box colors: gray, genes that match; green, genes only present in *Ascaris*; and orange: genes only present in *Parascaris*. Note the inversion at the right end of the largest syntenic block (AgB01).
