# Supplementary material for: Comparative genome analysis of programmed DNA elimination in nematodes
Source: PubMed Central journal article supplement — Genome Res. 2017 Dec;27(12):2001–14. doi: 10.1101/gr.225730.117 (PMC5741062; doi:10.1101/gr.225730.117), 2017-12
Supplement: supp_gr.225730.117_Supplemental_Fig_S8.pdf [file supp_gr.225730.117_Supplemental_Fig_S8.pdf]

**A** Tg0001 (2,930,226 bp)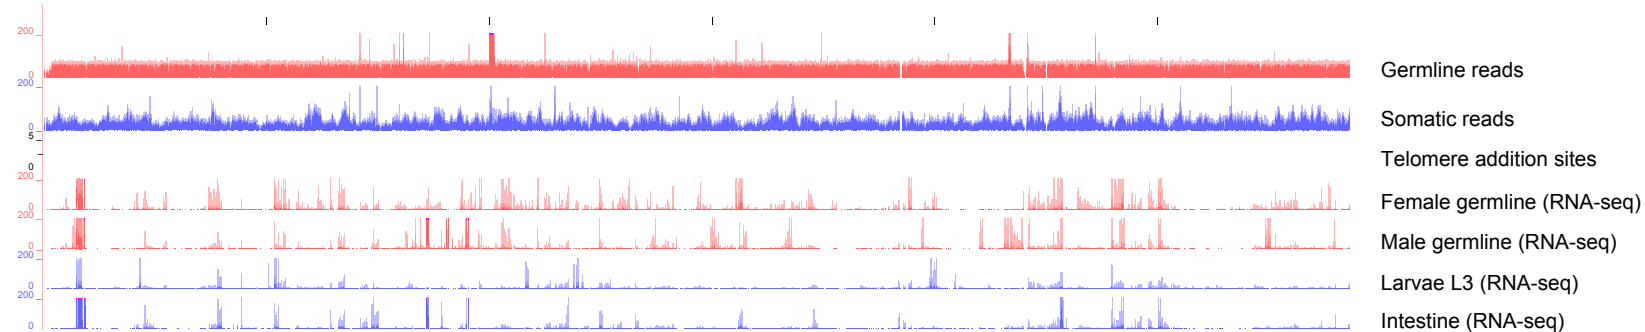**B** Tg0352 (266,959 bp)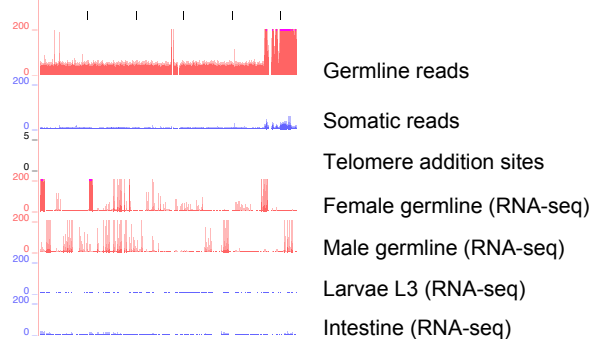**C** Tg0004 (1,915,860 bp)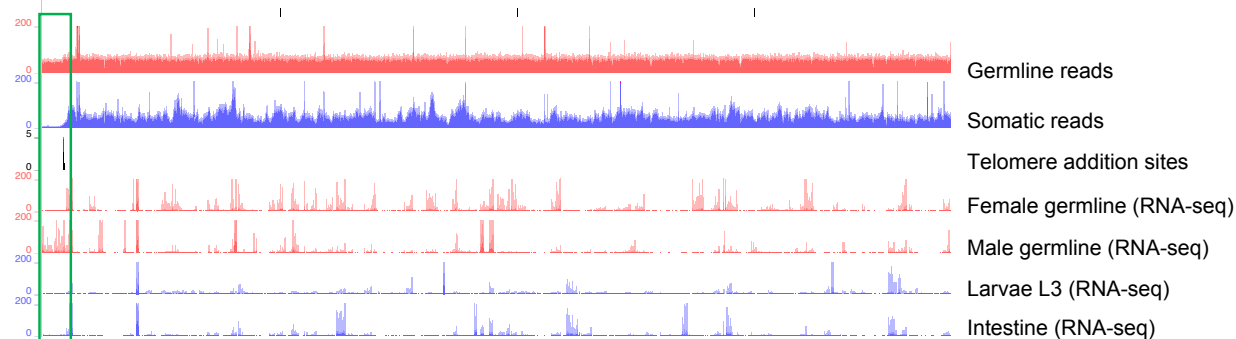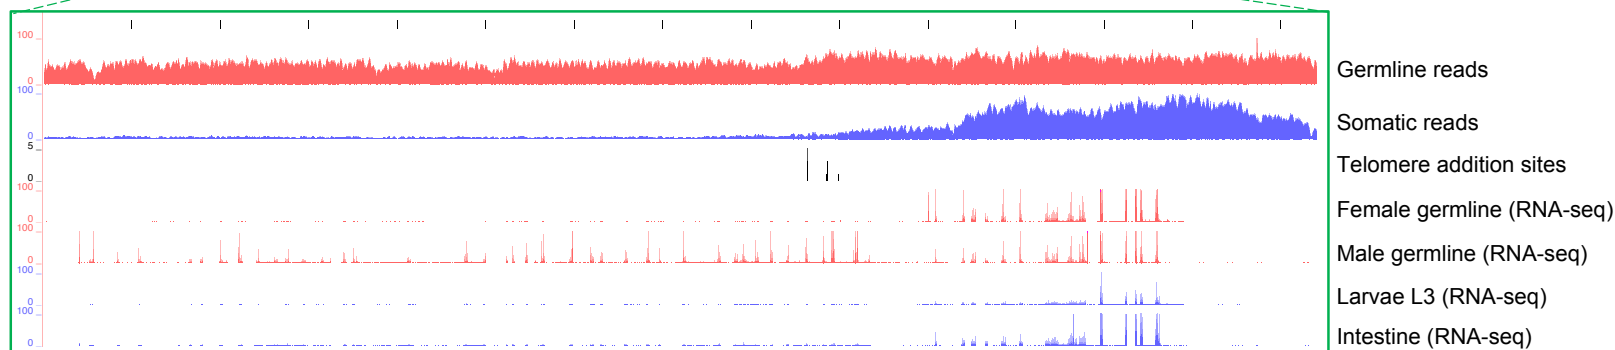

**Figure S8. DNA elimination in *Toxocara canis*.** A scaffold that is not eliminated (**A**, Tg0001), that is eliminated (**B**, Tg0352), and a scaffold illustrating both the region retained and eliminated (**C**, Tg0004) is illustrated. RNA expression profiles for germline and somatic tissues are also illustrated. Note eliminated genes are only expressed in the germline tissues.
