# Supplementary material for: Comparative genome analysis of programmed DNA elimination in nematodes
Source: PubMed Central journal article supplement — Genome Res. 2017 Dec;27(12):2001–14. doi: 10.1101/gr.225730.117 (PMC5741062; doi:10.1101/gr.225730.117), 2017-12
Supplement: supp_gr.225730.117_Supplemental_Fig_S9.pdf [file supp_gr.225730.117_Supplemental_Fig_S9.pdf]

**A** Expression of *Parascaris* Eliminated Genes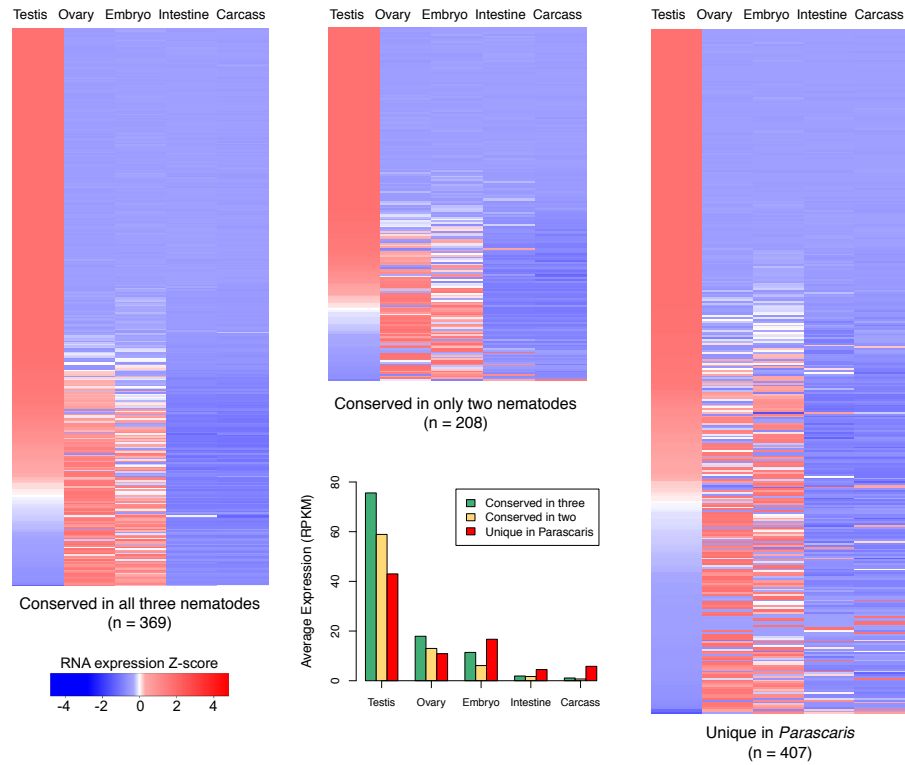**B** Expression of *Toxocara* Eliminated Genes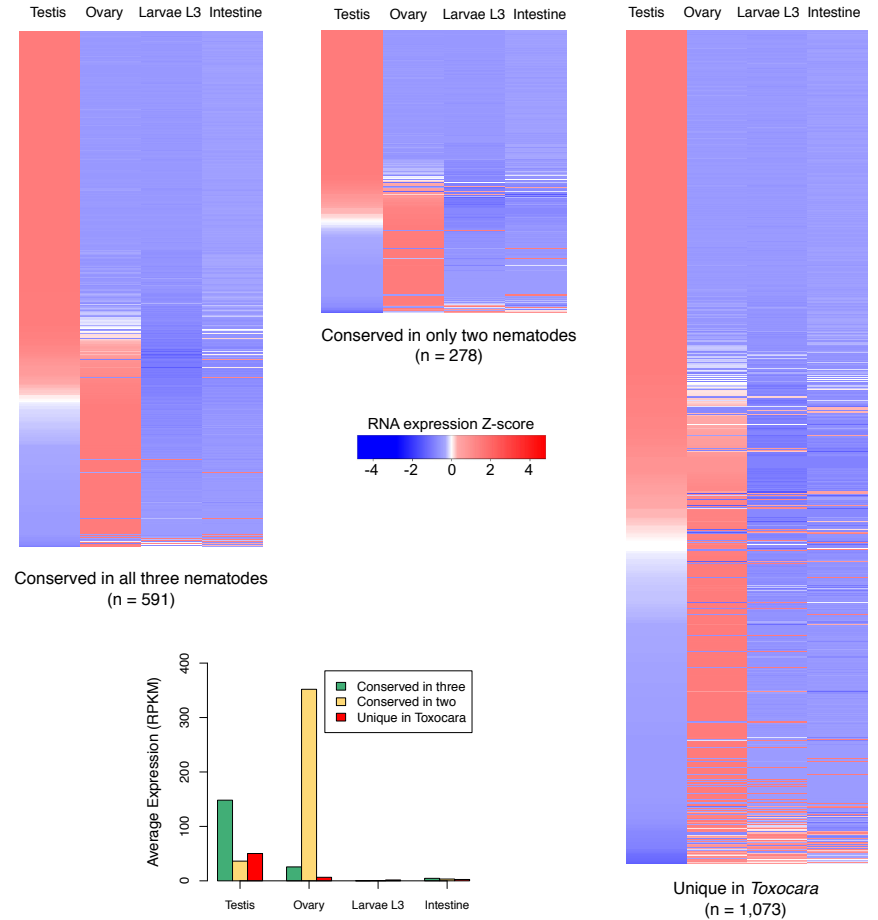

**Figure S9. Gene expression profiles for eliminated genes in *Parascaris* and *Toxocara*.** **A.** Heatmap expression profiles of *Parascaris* genes that are eliminated in all three nematodes, eliminated in two nematodes, or the eliminated genes that are unique to *Parascaris*. **B.** Heatmap expression profiles of *Toxocara* genes that are eliminated in all three nematodes, eliminated in two nematodes, or the eliminated genes that are unique to *Toxocara*.
