# Supplementary material for: Comparative genome analysis of programmed DNA elimination in nematodes
Source: PubMed Central journal article supplement — Genome Res. 2017 Dec;27(12):2001–14. doi: 10.1101/gr.225730.117 (PMC5741062; doi:10.1101/gr.225730.117), 2017-12

Observed telomere addition sites for *A. suum* male #1 intestine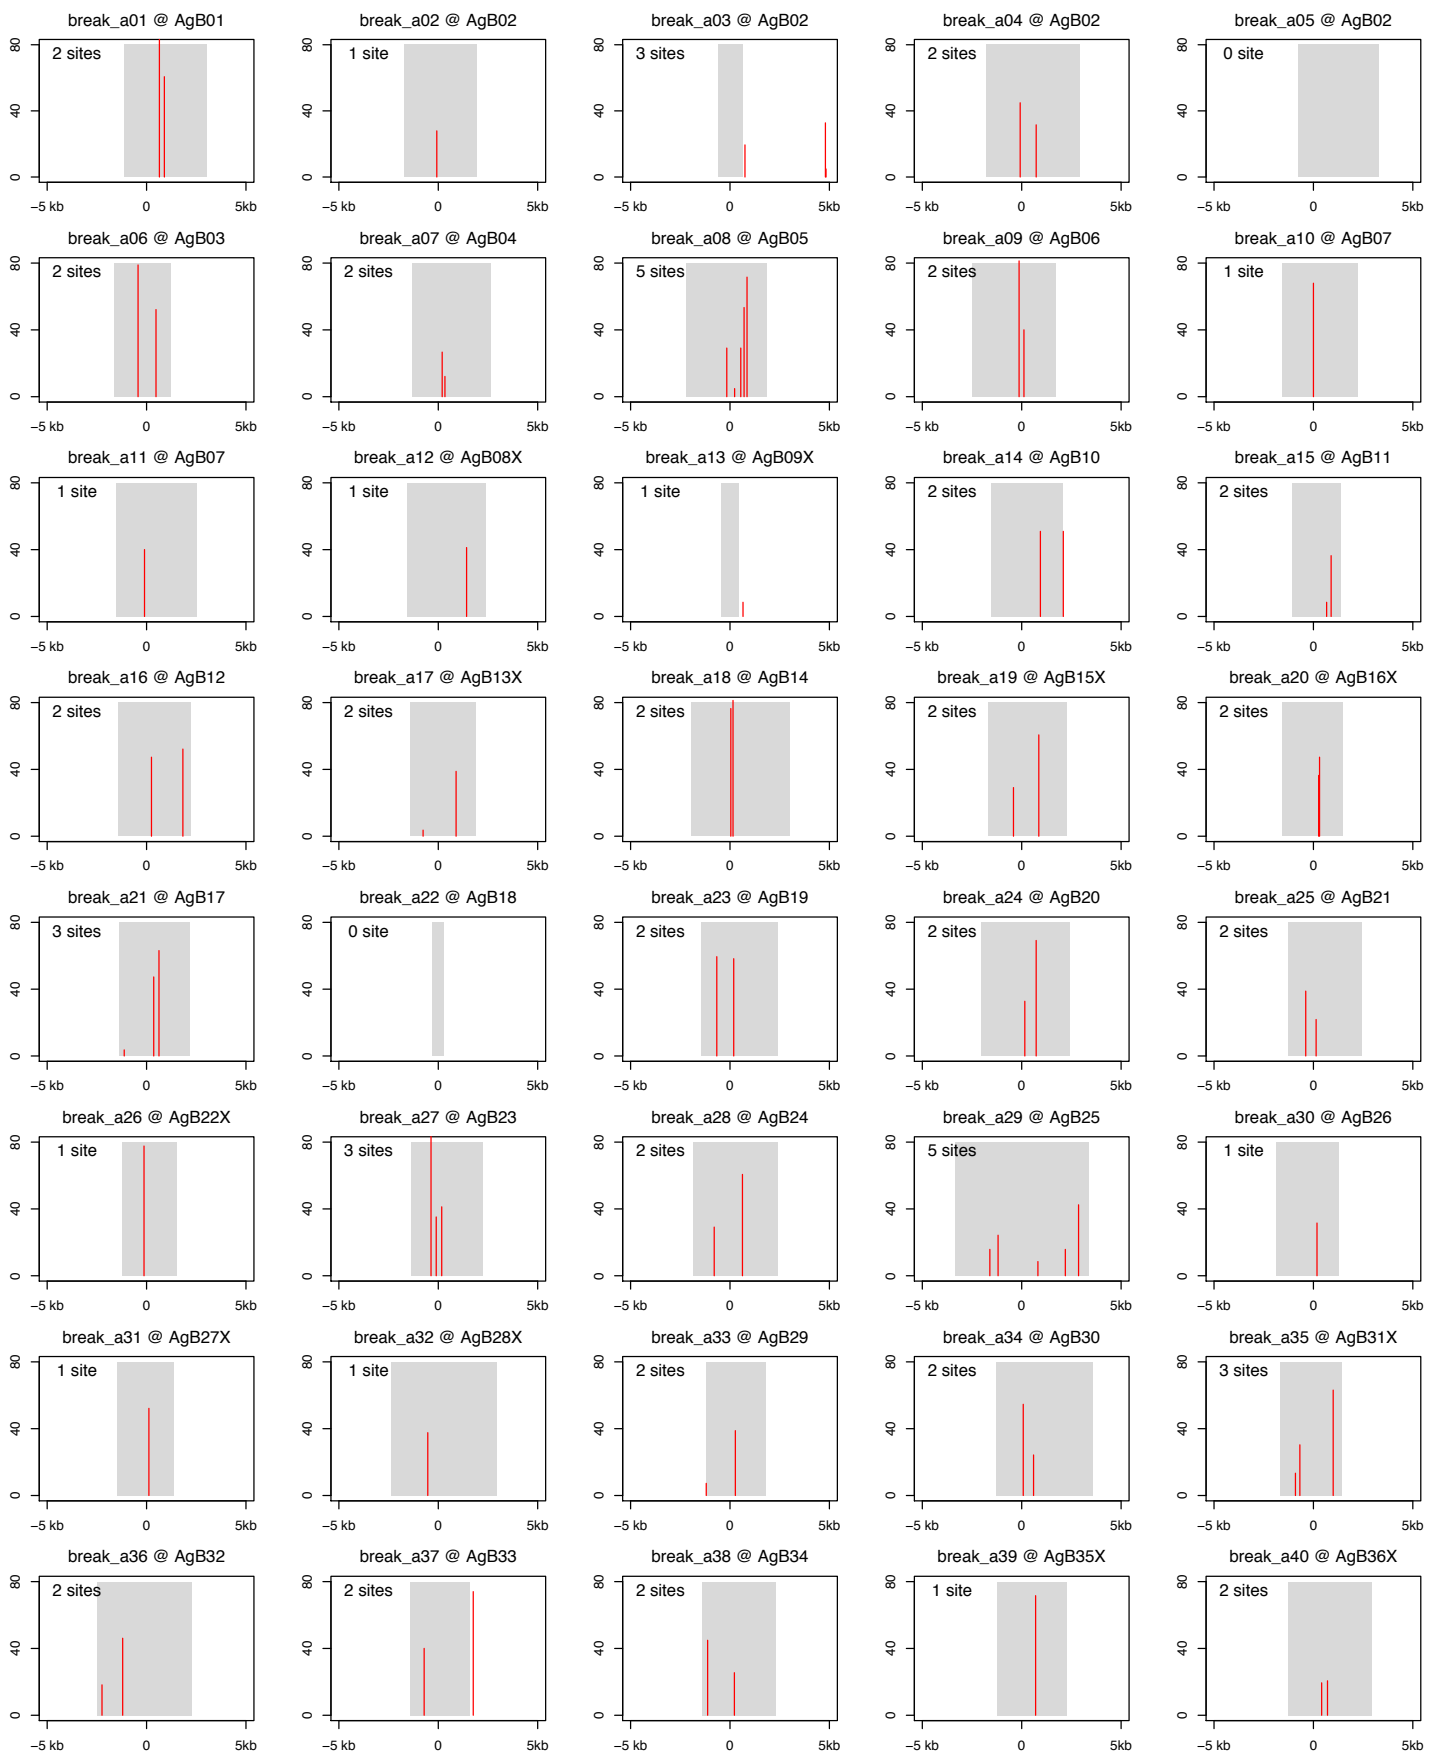

**Figure S10. *Ascaris* and *Parascaris* telomere addition sites.** The shaded area corresponds to the defined chromosomal break regions and the red ticks are the position and frequency (height) of the observed telomere addition sites. The center of the CBR is defined as where the highest density of observed telomere addition sites is in the population. The region to the left (minus) correspond to retained DNA while regions to the right (positive) correspond to eliminated DNA. The read frequency was normalized to 50X genome coverage (with 100 bp read length).

# Observed telomere addition sites for *A. suum* male #1 carcass

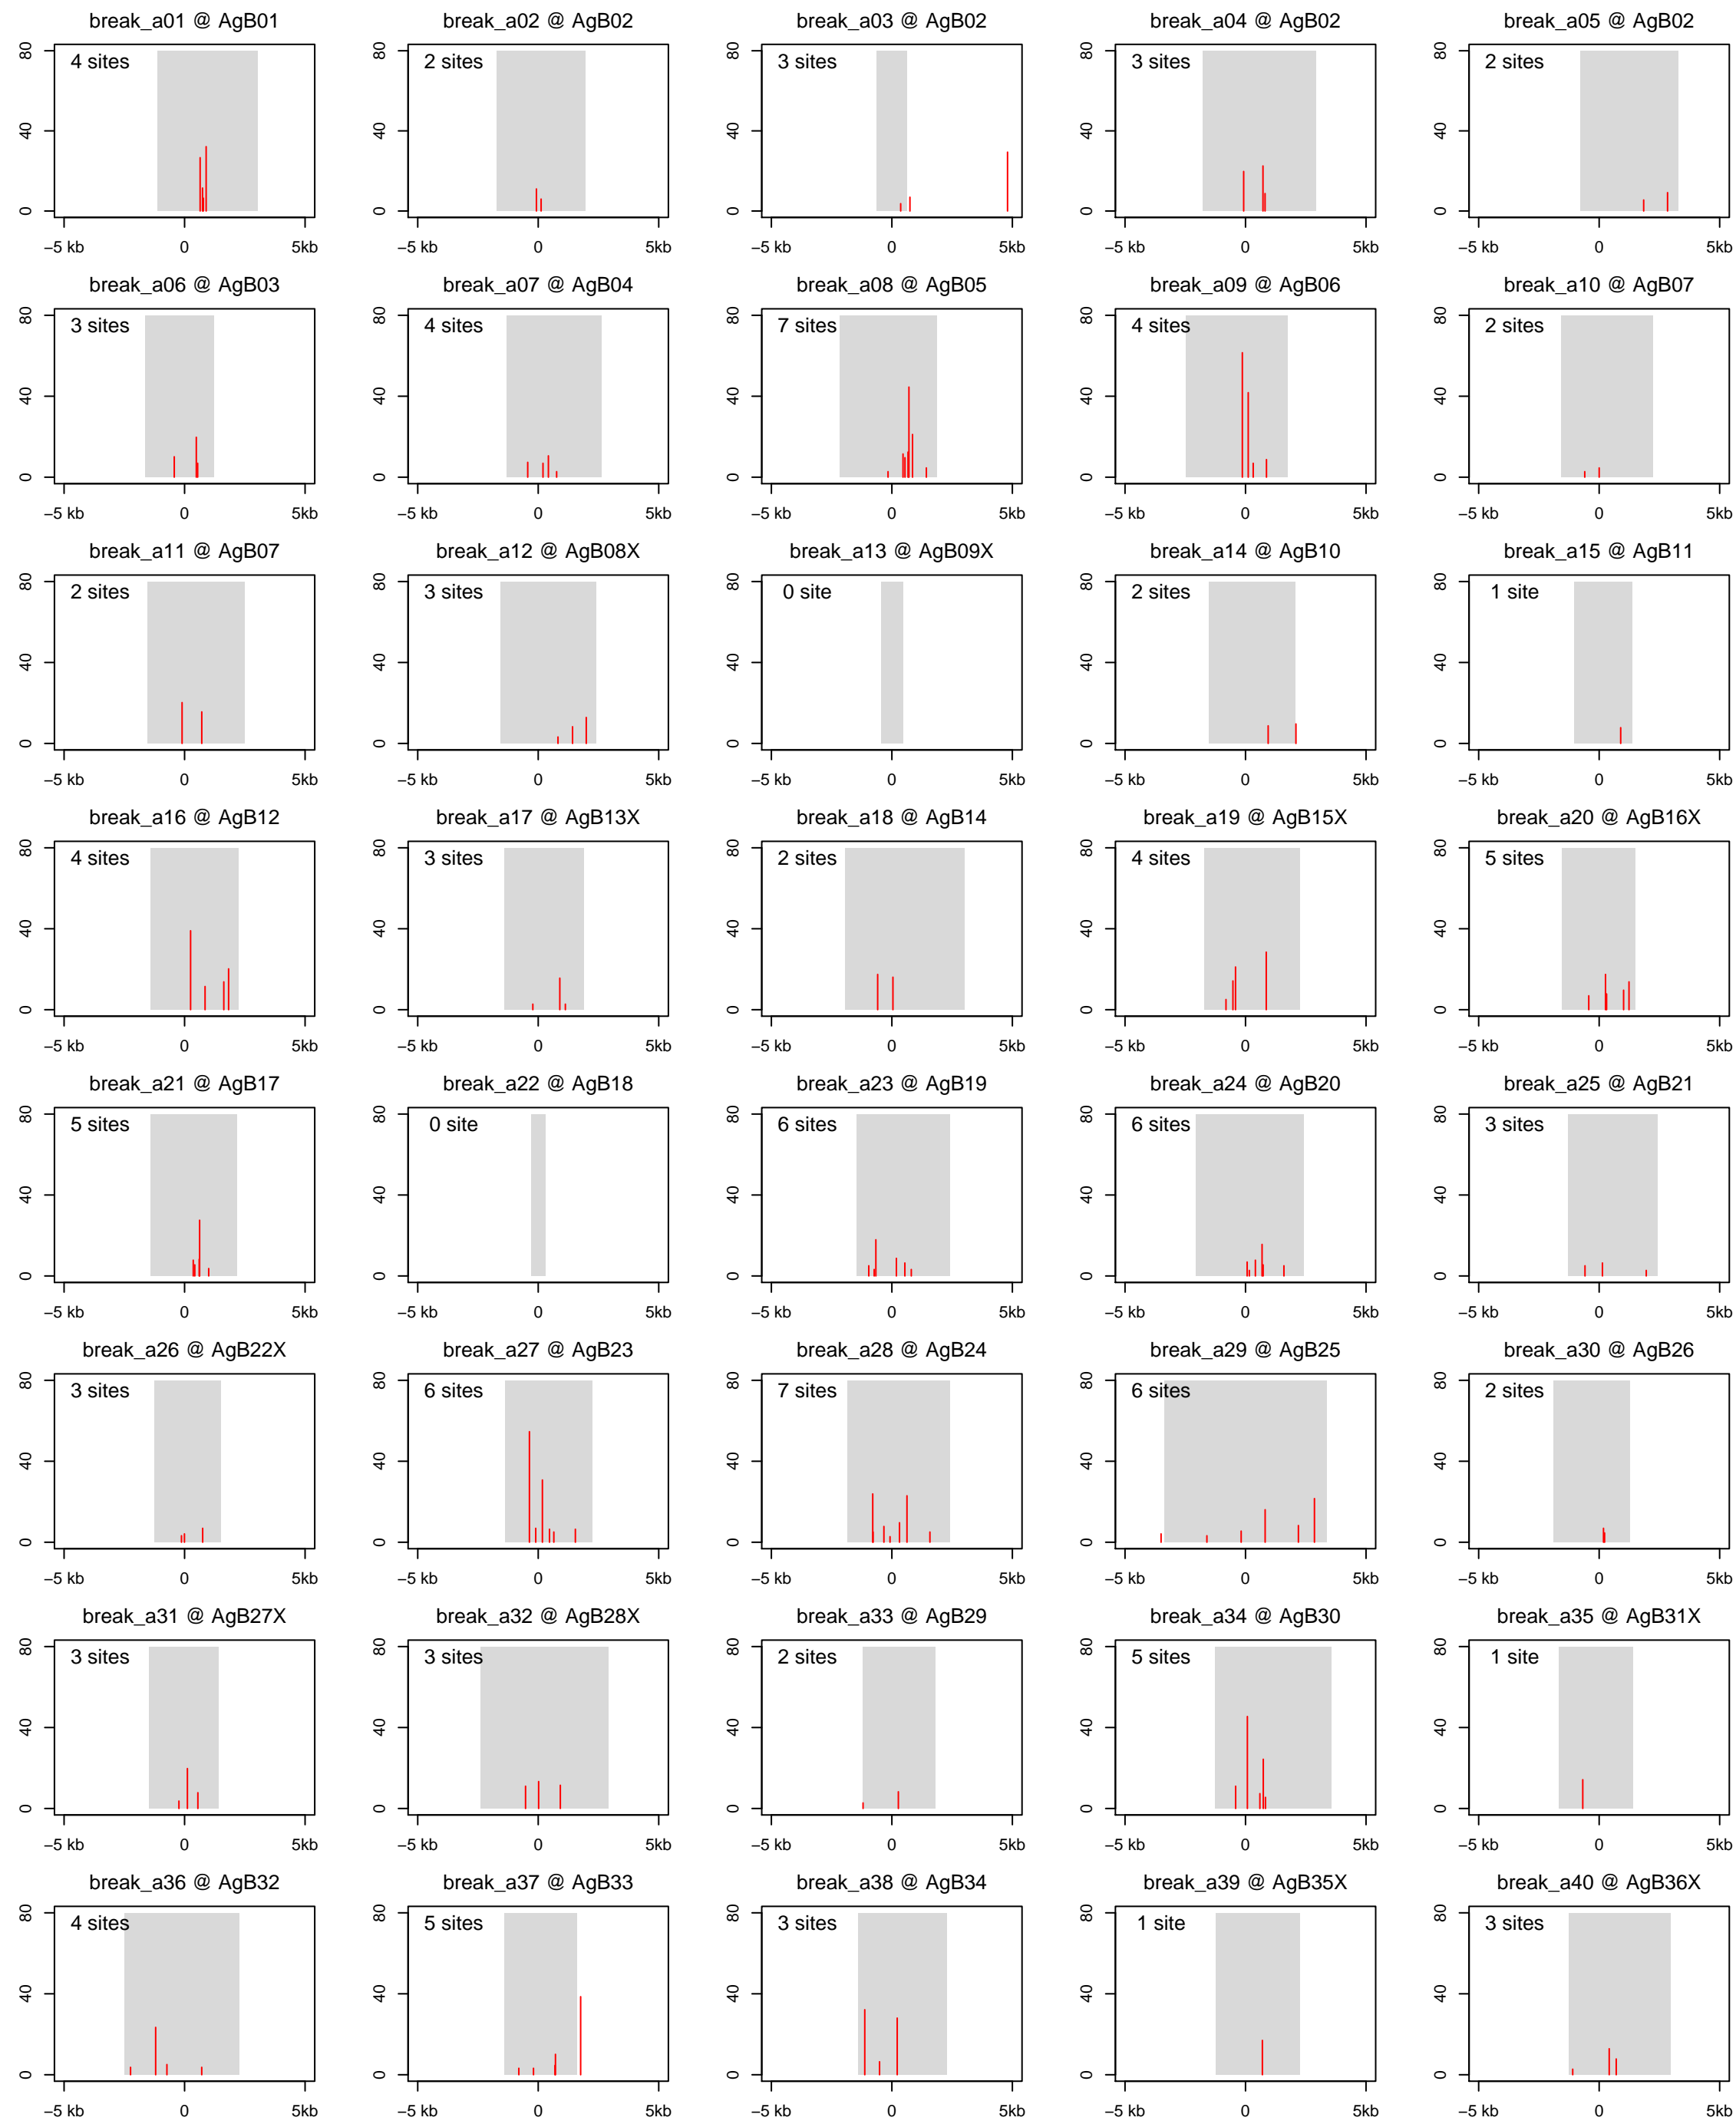

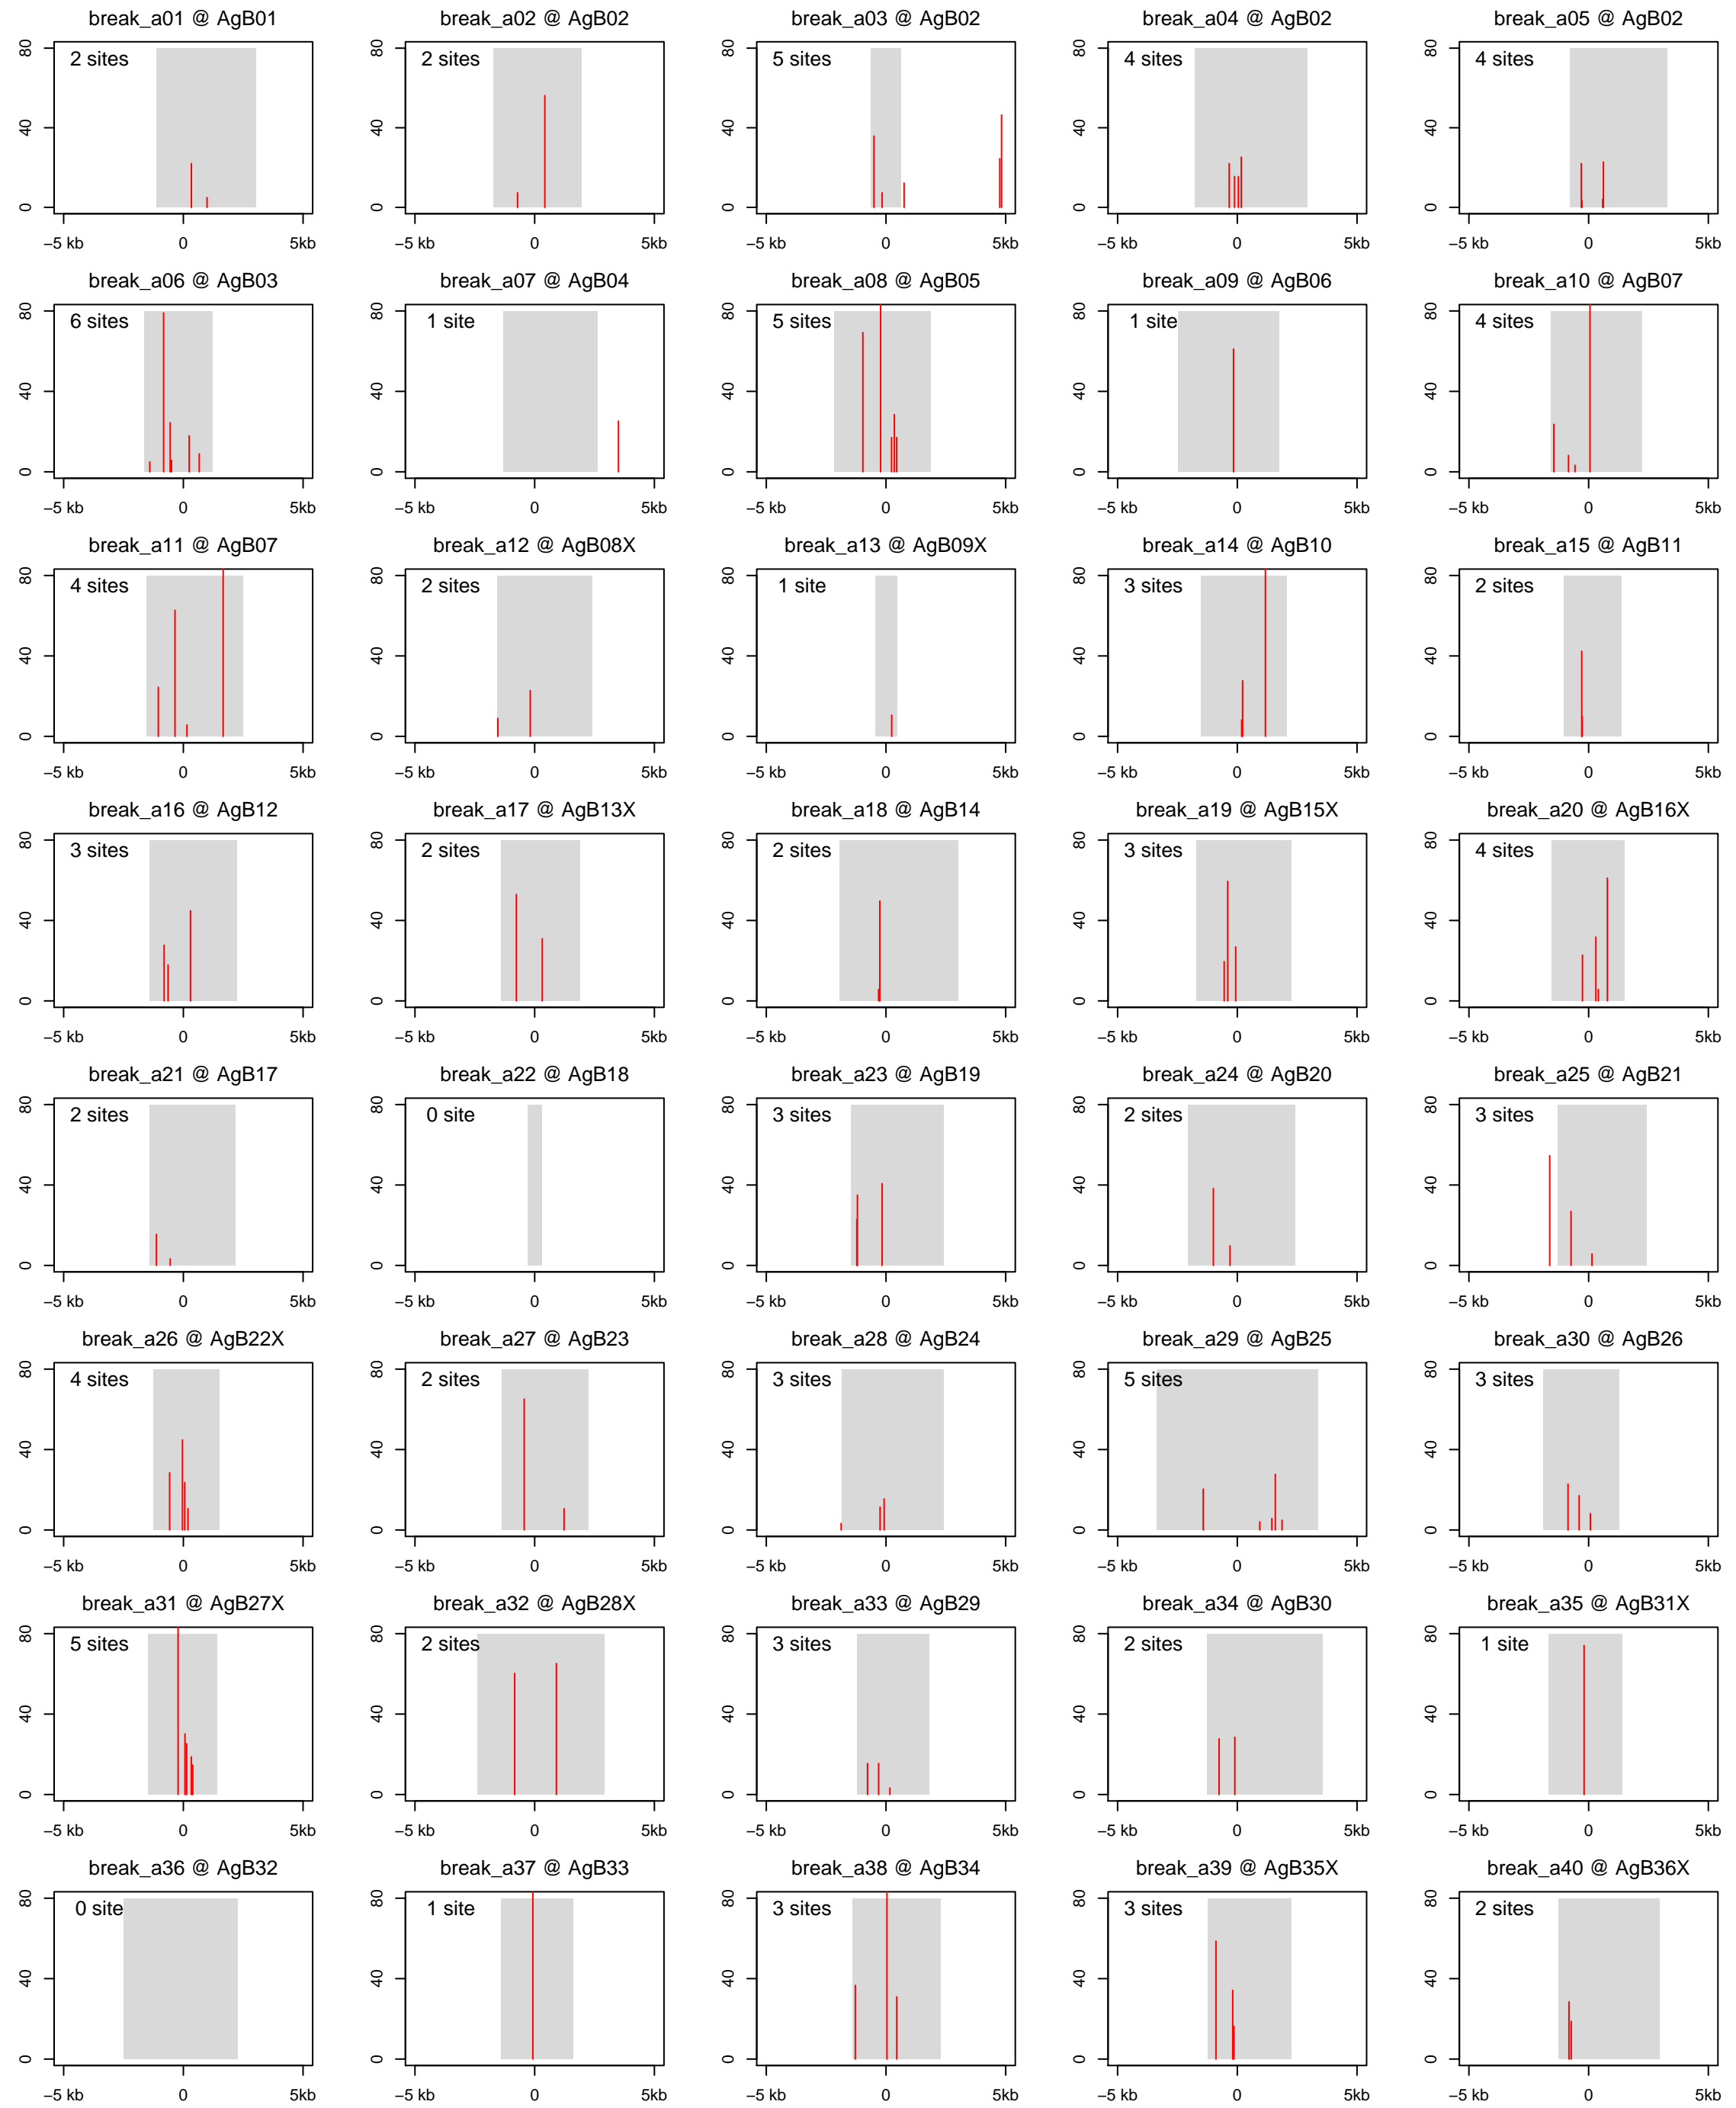

# Observed telomere addition sites for *A. suum* mixed population

Wang et al. Fig. S10d

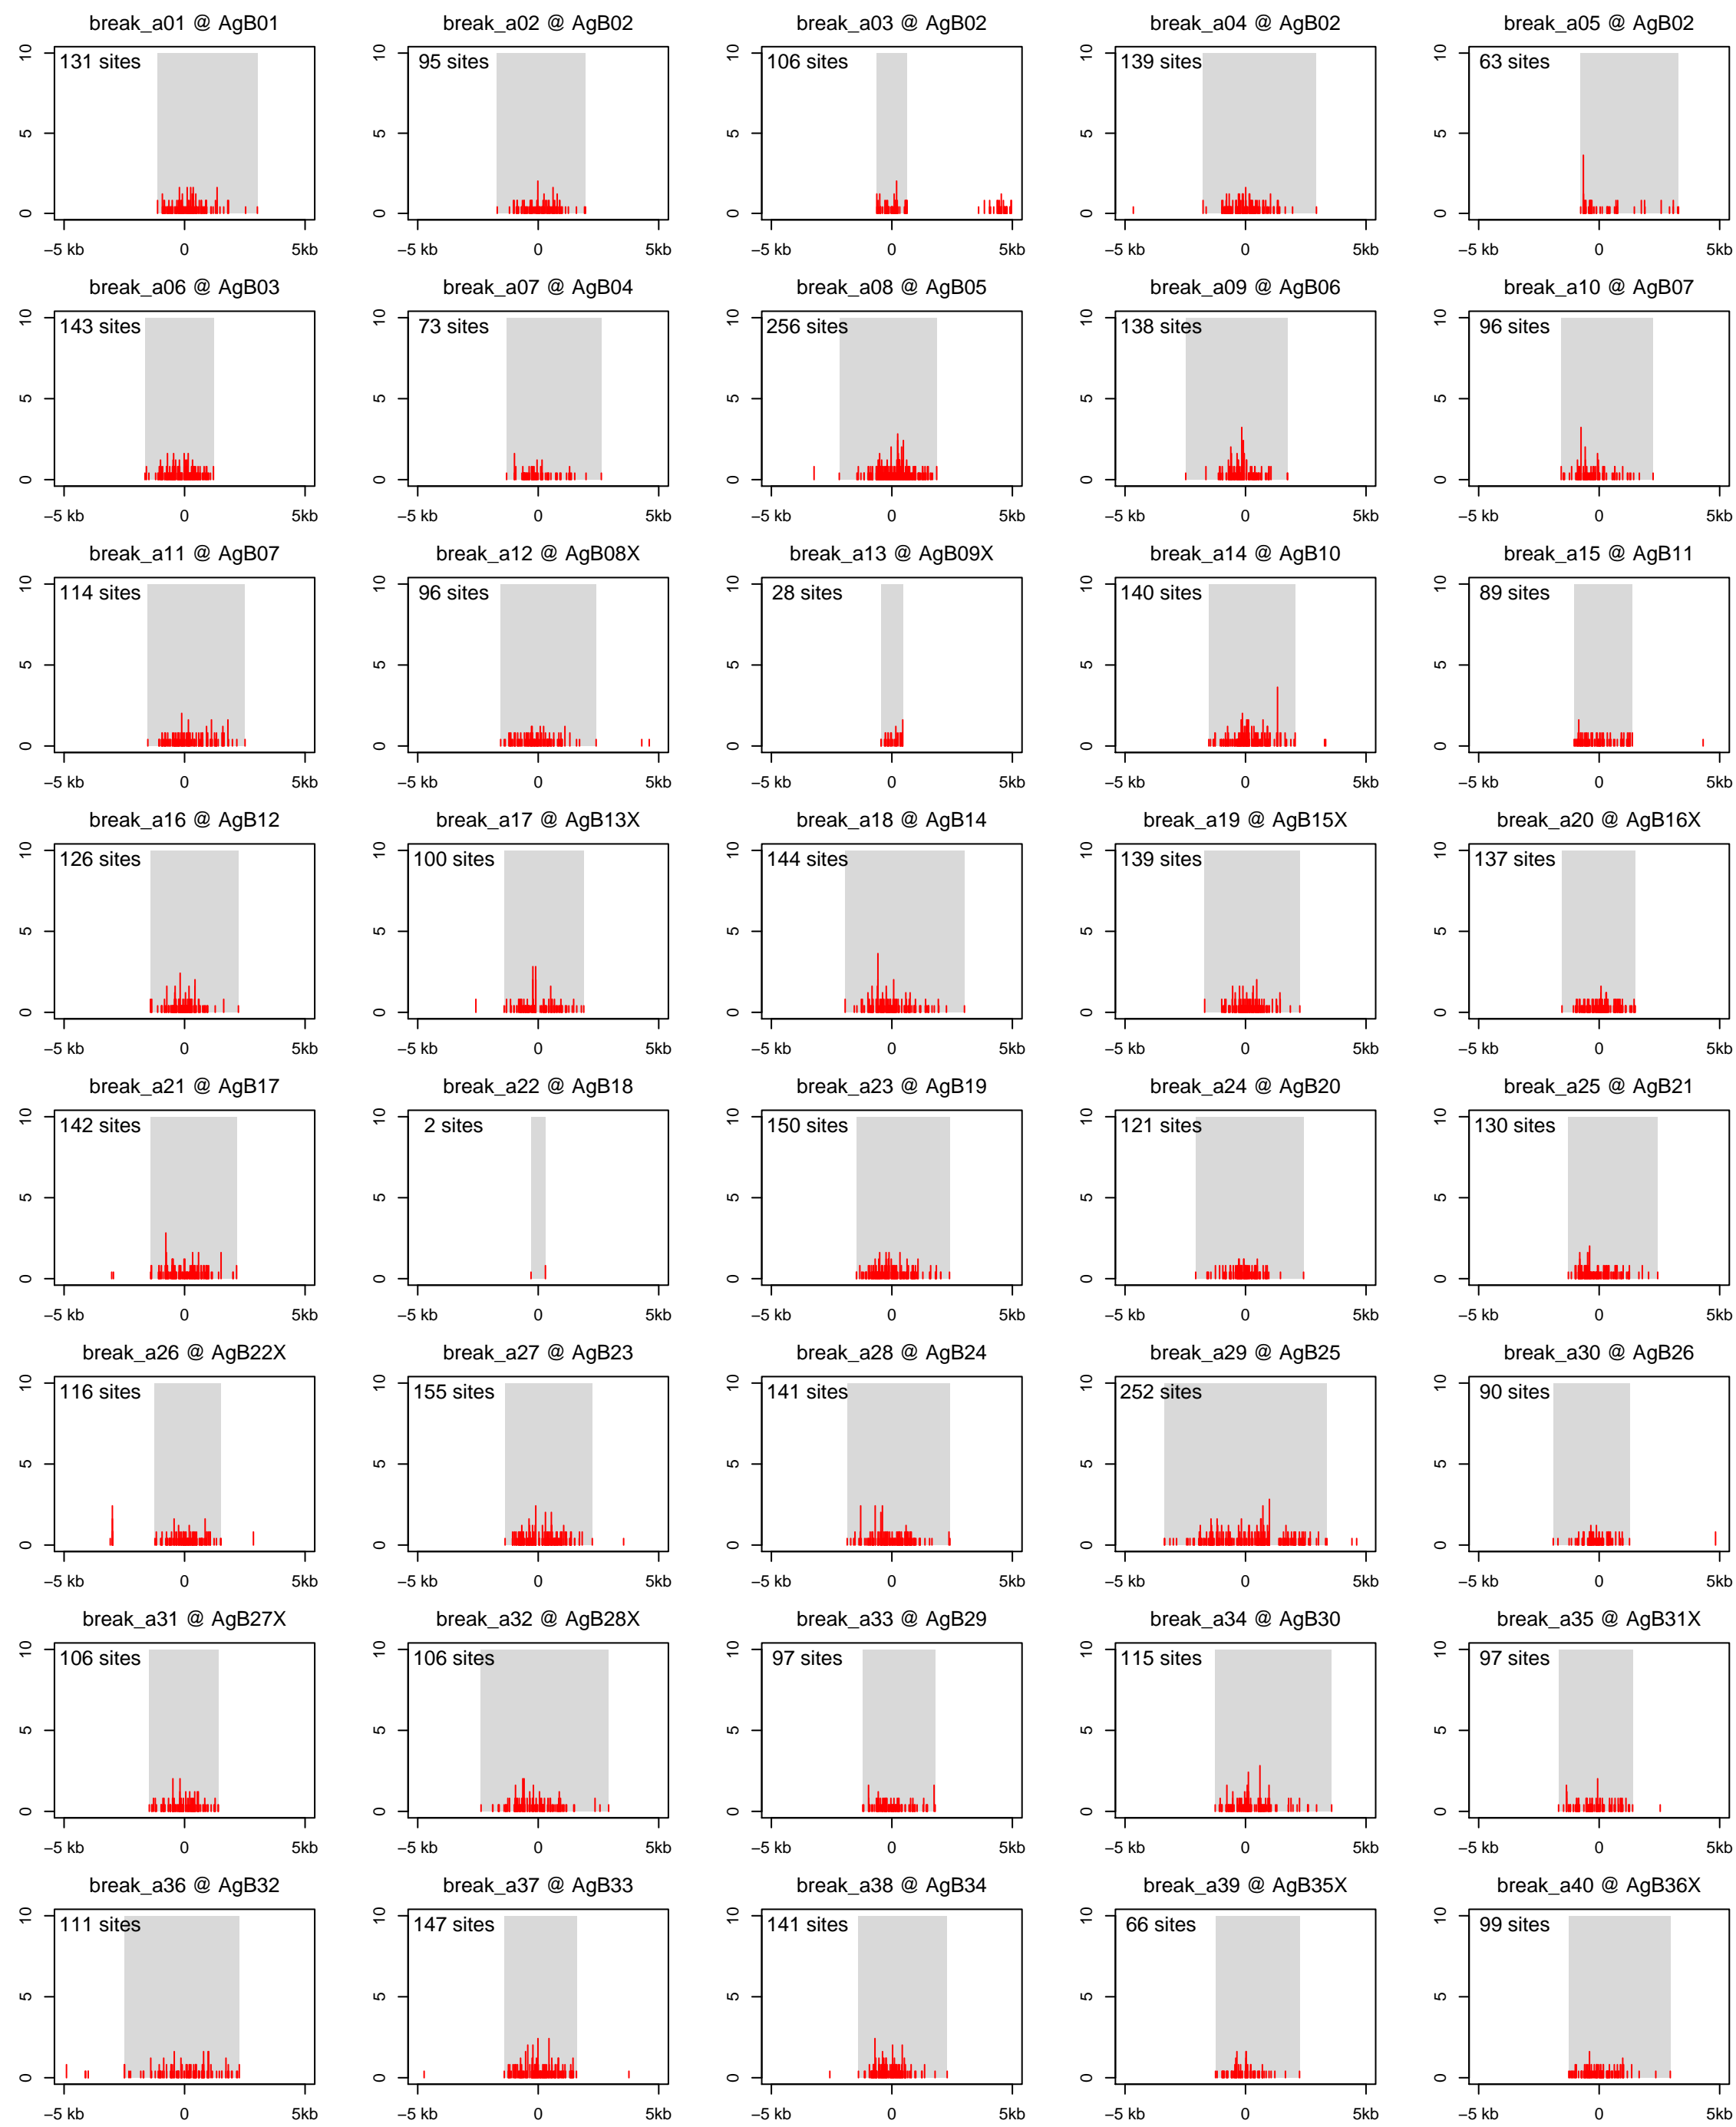

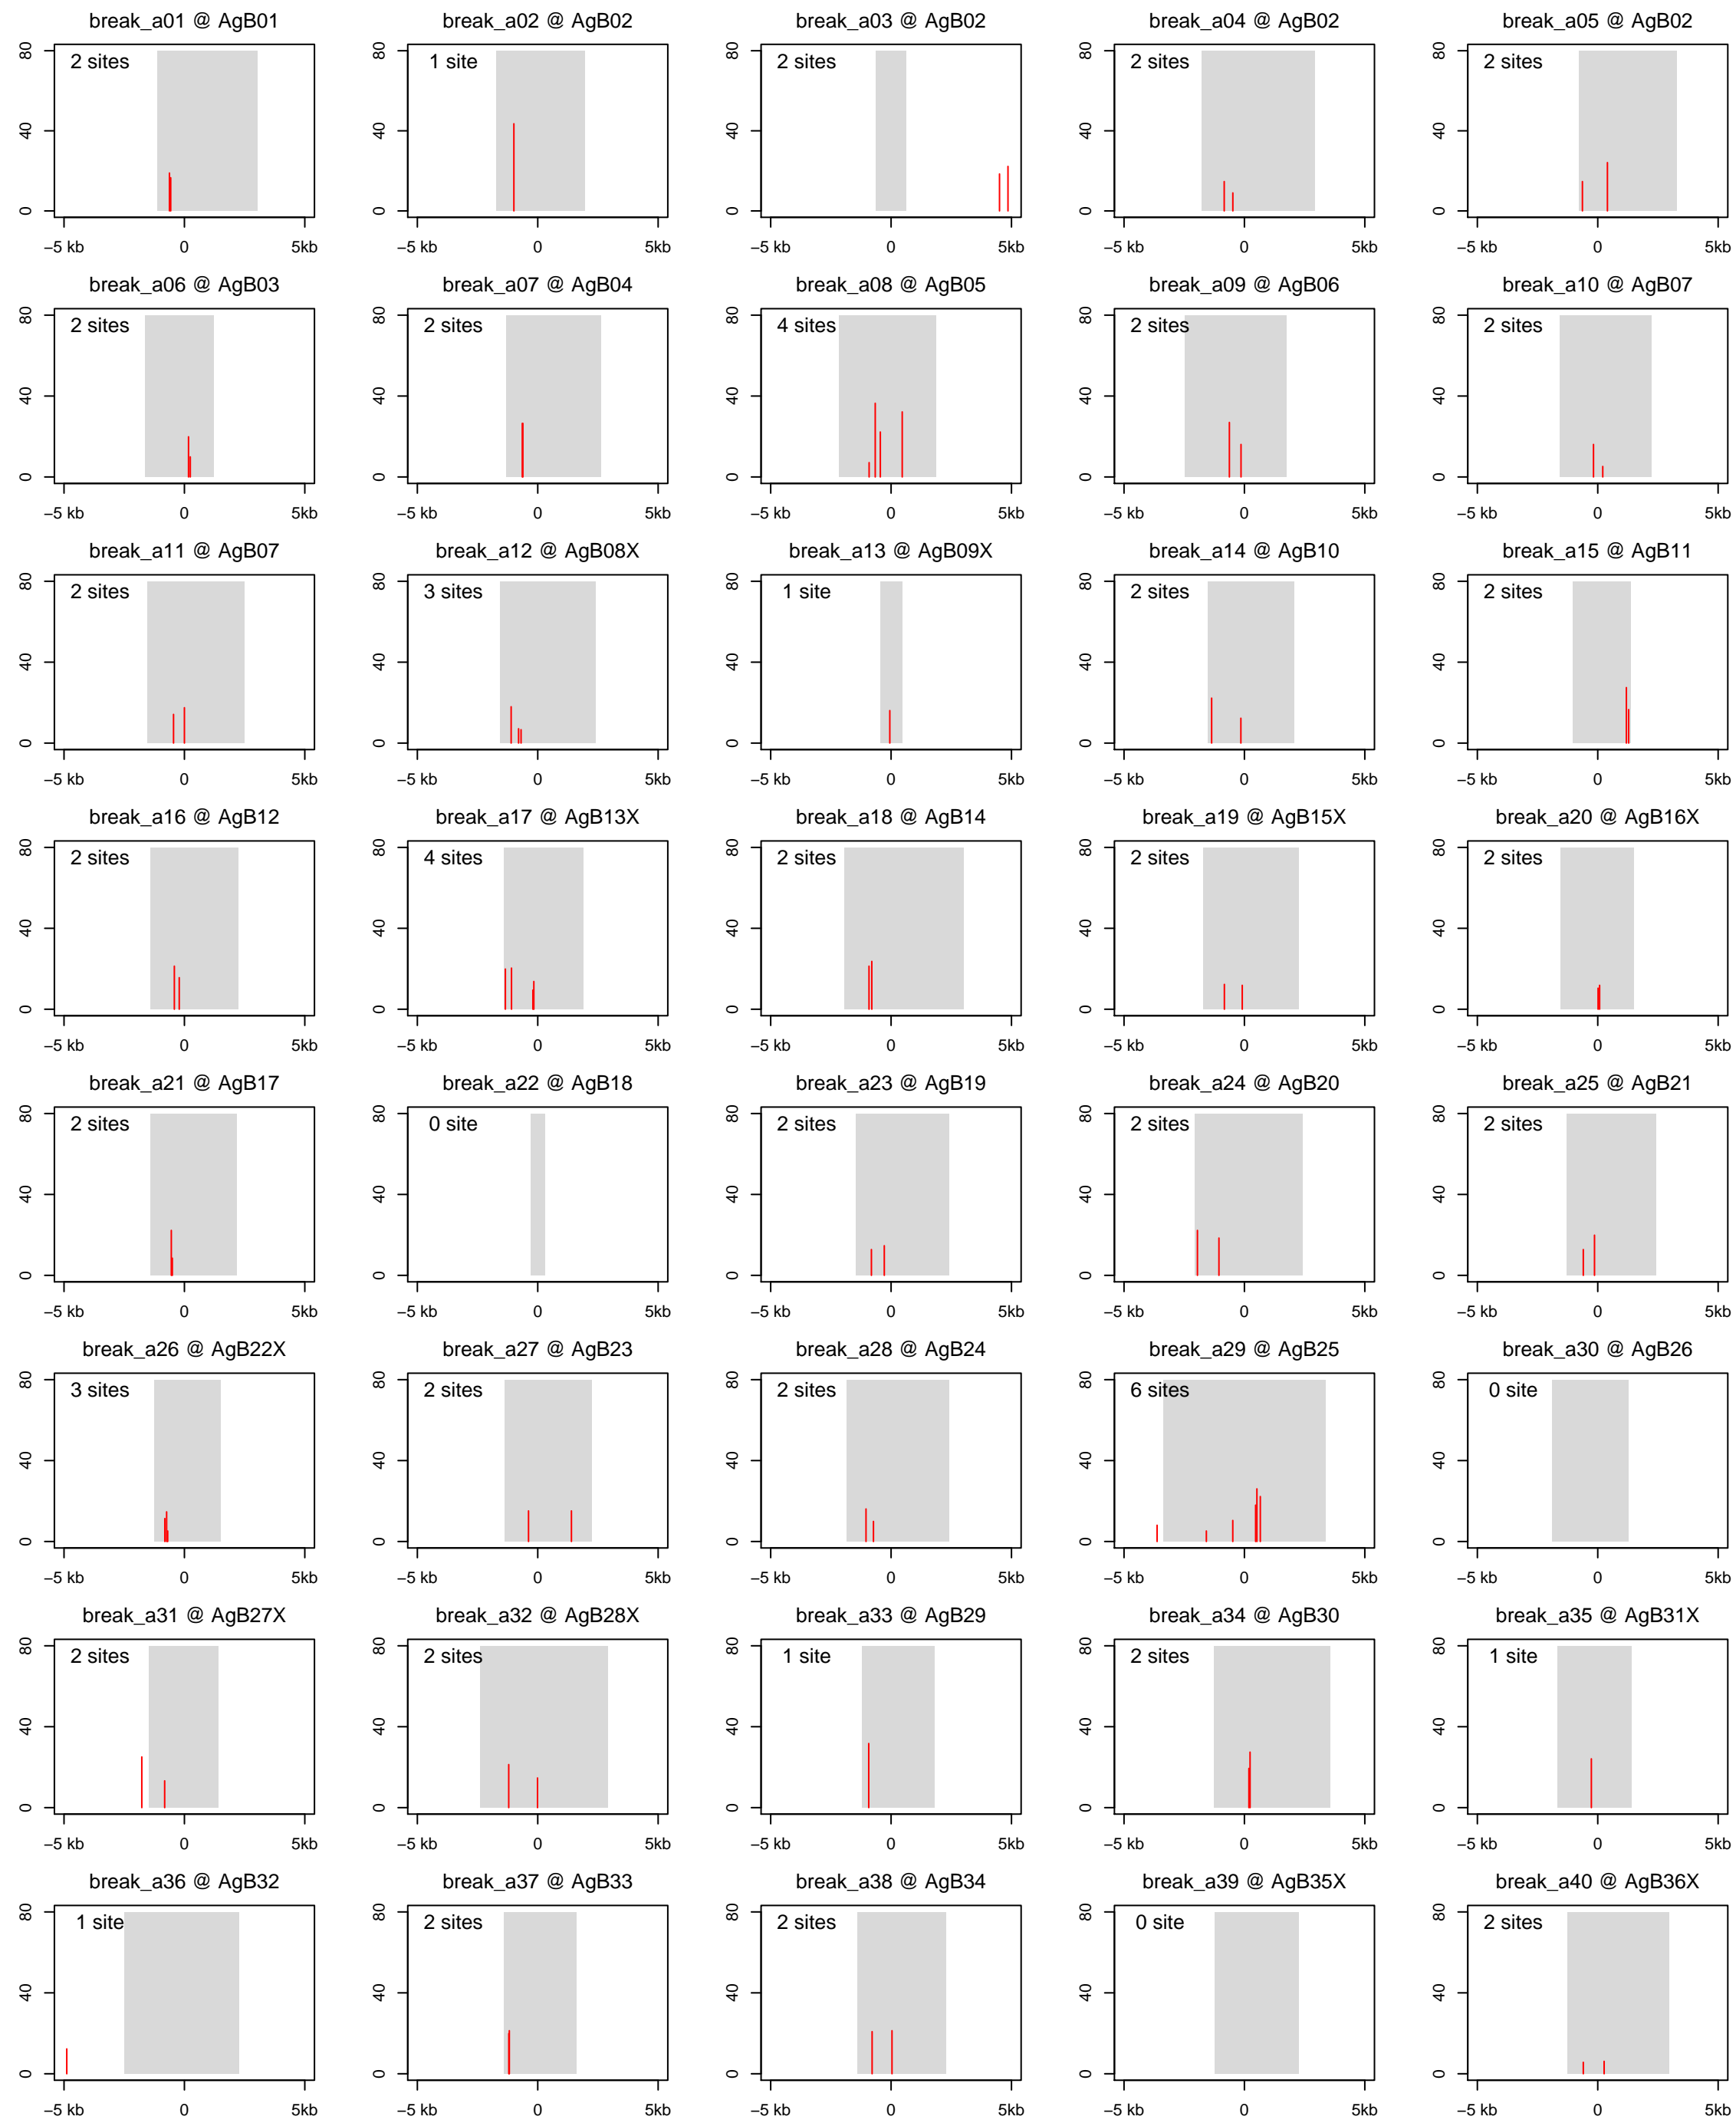

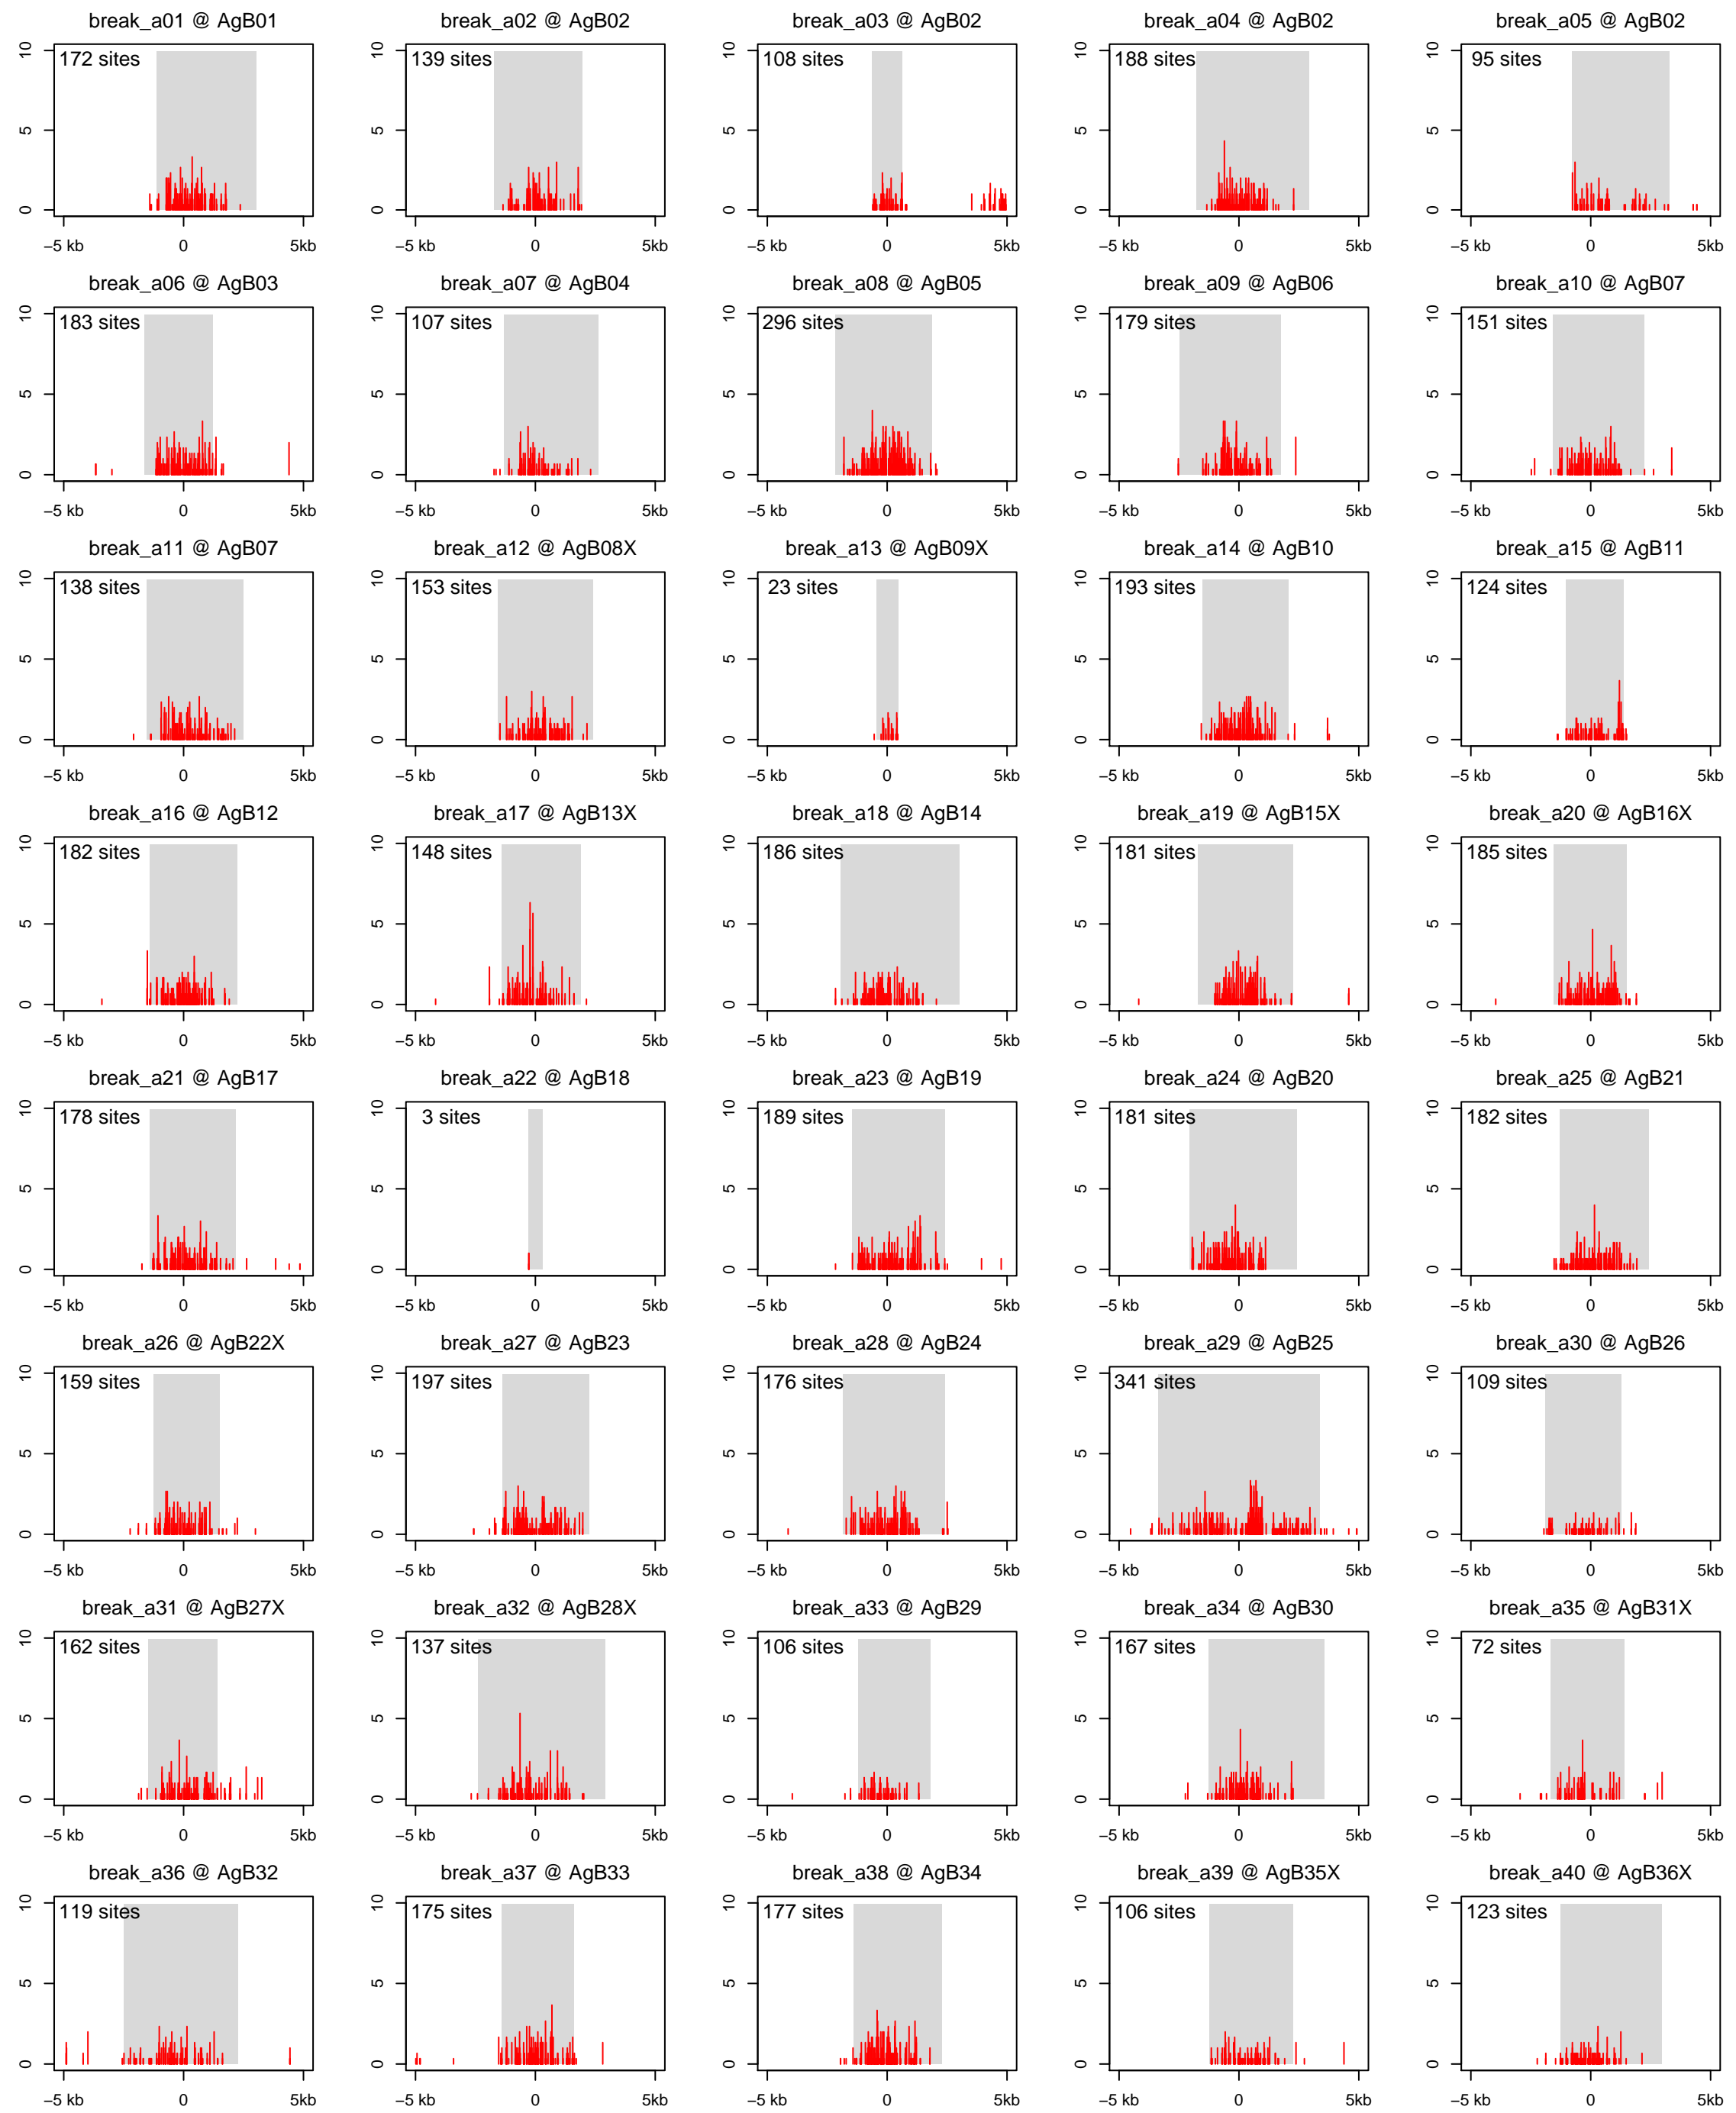

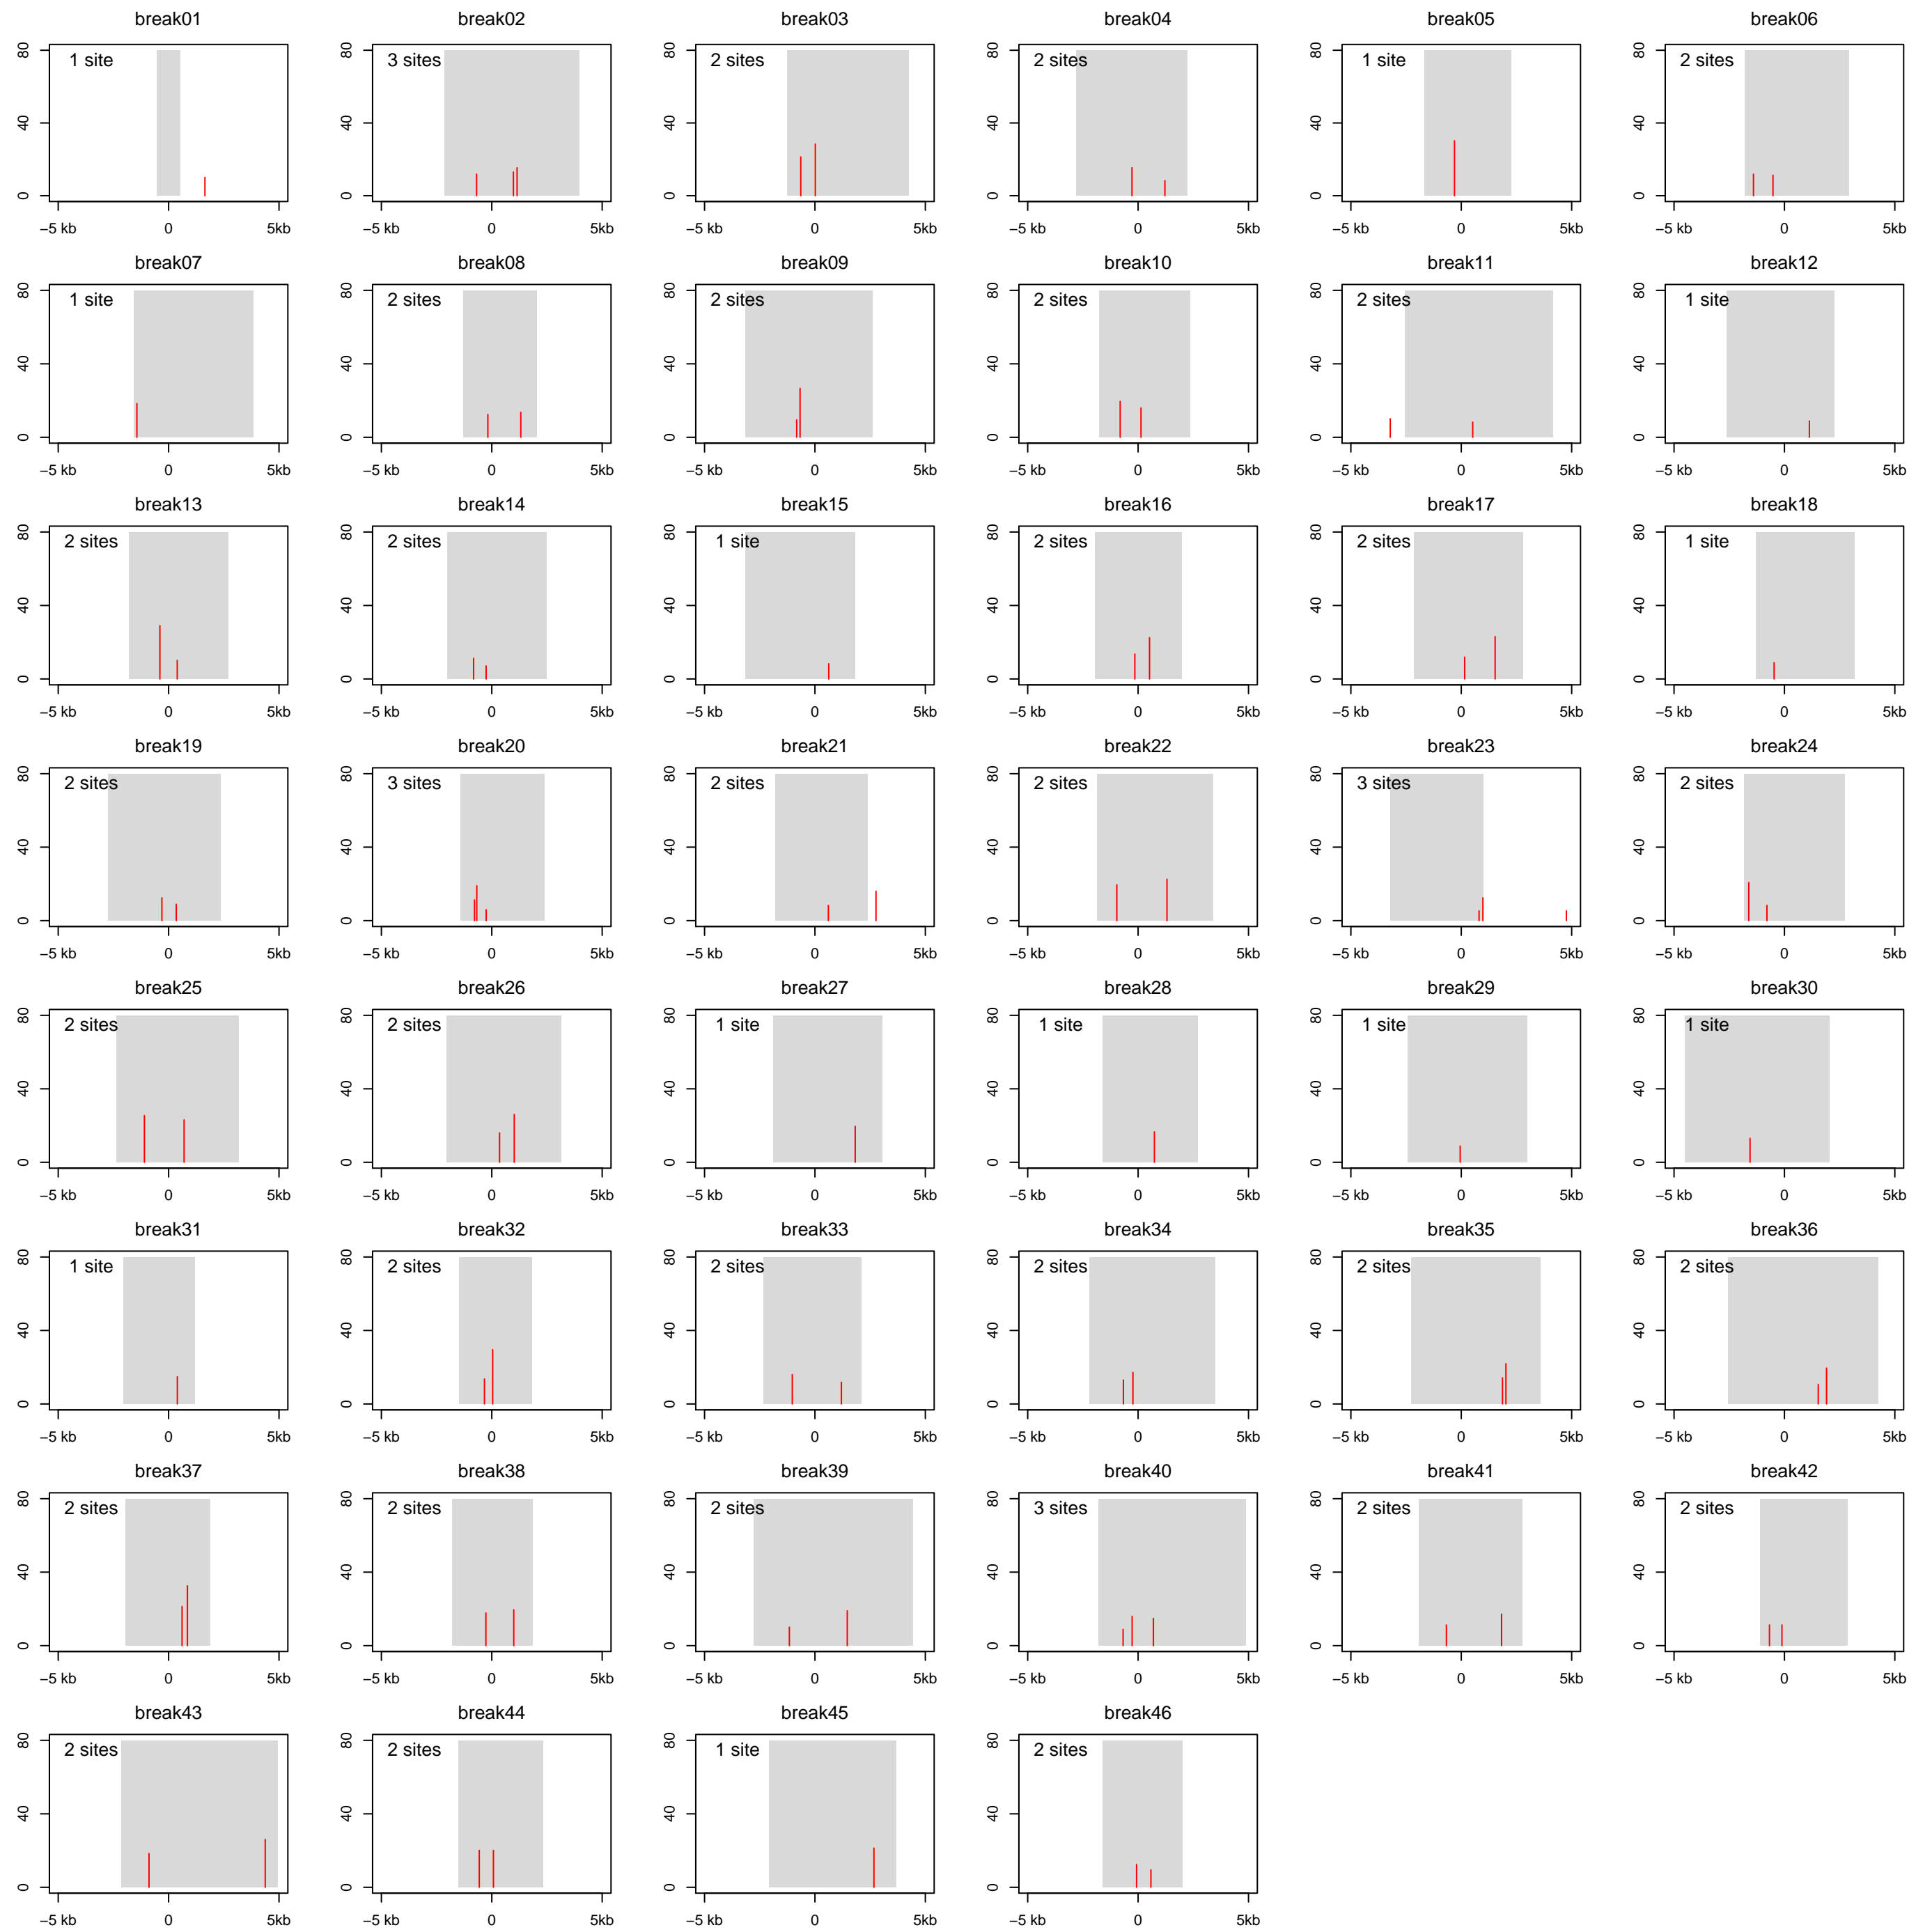

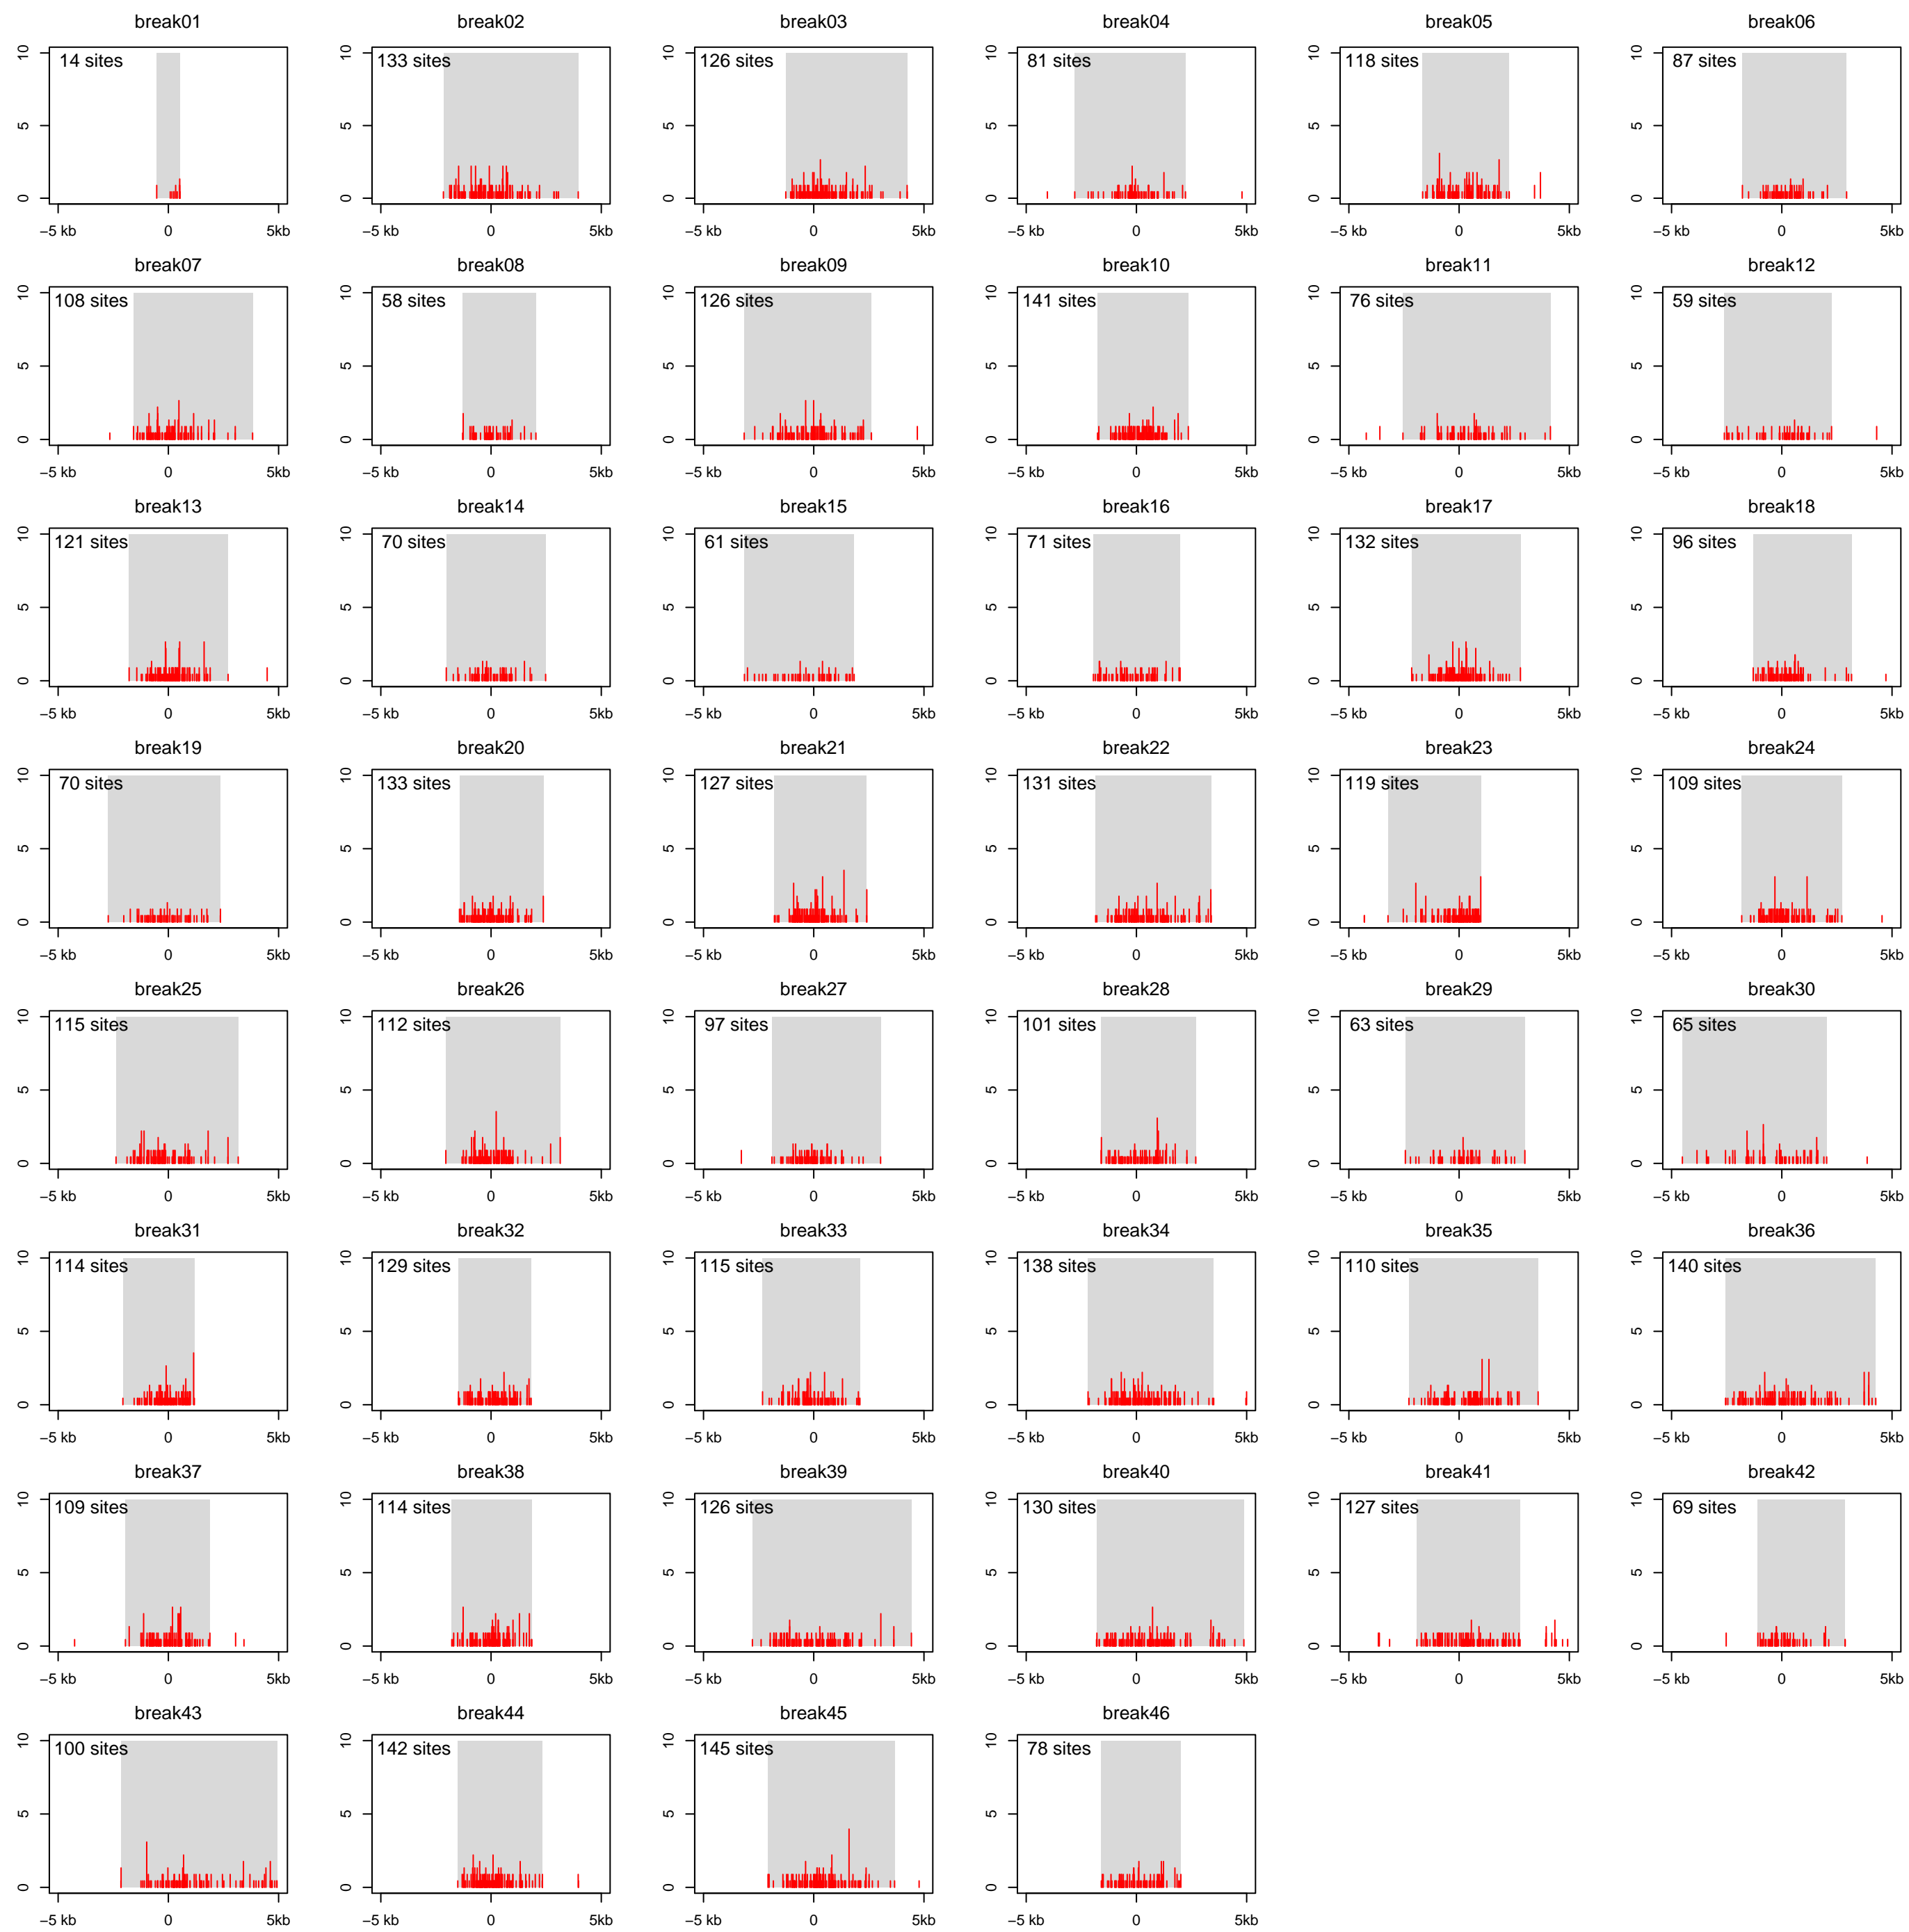

Supplement: supp_gr.225730.117_Supplemental_Fig_S10.pdf [file supp_gr.225730.117_Supplemental_Fig_S10.pdf]
