# Supplementary material for: Comparative genome analysis of programmed DNA elimination in nematodes
Source: HighWire-hosted journal article supplement (doi:10.1101/gr.225730.117), 2017-11-08
Supplement: Supplemental_Material.docx [file Supplemental_Material.docx]

**Supplemental Material**

**Comparative Genome Analysis of Programmed DNA Elimination in Nematodes**

Jianbin Wang, Shenghan Gao, Yulia Mostovoy,Yuanyuan Kang, Maxim Zagoskin, Yongqiao Sun, Bing Zhang, Laura K. White, Alice Easton, Thomas B. Nutman, Pui-Yan Kwok, Songnian Hu, Martin K. Nielsen and Richard E. Davis

Supplemental material contains Supplemental Text, 11 Supplemental Figures, 13 Supplemental Tables, and Supplemental Material and Methods.

**Supplemental Figures**

1. Characterization of the 5’ ends of *Ascaris* mRNAs
2. Sex chromosome identification
3. *Ascaris* sex chromosomes
4. *Parascaris* RNA expression during development
5. Whole genome synteny between *Ascaris* and *Parascaris*
6. Examples of *Ascaris* and *Parascaris* synteny
7. Comparative genomics in nematodes
8. DNA elimination in *Toxocara*
9. Gene expression profiles for eliminated genes in *Parascaris* and *Toxocara*
10. *Ascaris* and *Parascaris* telomere addition sites
11. Sequence analysis of telomere addition sites

**Supplemental Tables**

1. Genome assembly data and analysis
2. Genome assembly comparison
3. *Ascaris*, *Parascaris and Toxocara* repetitive sequences
4. *Ascaris* genes, annotation, and expression
5. *Parascaris* genes, annotation, and expression
6. *Ascaris* and *C. elegans* sex chromosomes
7. Newly identified and merged *Ascaris* genes
8. Comparative genomics of nematodes
9. Nematode orthologous gene groups
10. *Ascaris,* *Parascaris* and *Toxocara* chromosomal break regions
11. *Ascaris,* *Parascaris* and *Toxocara* eliminated genes
12. GO annotation and enrichment analysis for eliminated genes
13. Lack of telomeric position effect following DNA elimination in *Ascaris*

**Supplemental Text**

**Optical mapping from BioNano**

We used two restriction enzymes (BspQI and BbvCI) to generate four independent restriction maps (optical mapping from BioNano Genomics Irys) for the *Ascaris* germline and somatic genomes. Using these two enzymes provides data confirmation on the assembled regions as well as an increased frequency of overall mapping of the genome. In general, the de-novo assembled restriction maps have large N50s and the genomic regions covered sum to the predicted genome sizes (Supplemental Table S1). In addition, there are only ~100 – 200 scaffolds in most of these BioNano maps. The numbers of these scaffolds are close to the number of chromosomes (35 or 36) in the genomes, suggesting these BioNano scaffolds provide a reference map for the chromosomes. Most of BioNano maps (> 80%) can be aligned to our assembled genomes (Supplemental Table S1). Overall, this suggests the BioNano maps are of high quality.

**Improvement of genome assemblies**

Our original and previously published *Ascaris* genome assemblies were based on Illumina paired-end and mate-pair libraries (Wang et al. 2012) Here, we added additional data from Illumina reads, PacBio, fosmid end sequencing, and optical mapping data to improve the assemblies. When Illumina paired-end reads were used as the main dataset to build contigs and other data were used to build the scaffolding, we often generated scaffolds with many large gaps. These assemblies often prevented us from extending the scaffolds into megabase super-scaffolds presumably due to mis-assemblies (See Table S2, green area). When we used PacBio reads as the main source to build contigs while complementing with Illumina reads (See Table S2, blue area), more reliable genome assemblies with better metrics were assembled. The final assemblies we present were assembled through iterations of processes including de-novo assembly, step-wise scaffolding, validation with optical maps, and then followed by re-assembly of un-validated regions (see methods, Supplemental methods, and Table S2, yellow area). This approach guarantees that the majority of the assembled genomes have support from at least two different types of sequencing data. Although it takes longer to achieve the final assembly using this approach, we believe that it minimizes the mis-assemblies generated by each of the different types of sequence data. A comparison of different possible approaches to assemble the genome is illustrated in Table S2. We note that our final assemblies using the iterative approach generate the best assemblies based on the assembly metrics (Table S2). Ultimately, the quality of each set of sequence data used will determine the quality of the final assembly. With the current data, only high quality, very longs reads (Nanopore and perhaps exceptionally long PacBio reads) and Hi-C technologies are likely to further improve our current assemblies.

The strategy we used here was optimal for our genomes and the type of sequencing and mapping data we obtained. We note that the optimal genome assembly strategy to use for a given genome is dependent on the size and the complexity of the genome. In particular, the organization and content of the repetitive sequences have a large influence on assembly strategy. The strategy is also dependent on the types and the quality of data that can be obtained from various sequencing platforms. Evolving sequencing technologies, including long sequencing reads and long-range scaffolding information derived from optical mapping and chromatin interaction (Hi-C) data combined with new and improved assembly algorithms should enable reference quality genome assemblies.

One goal of this work was to obtain chromosome level assemblies for both the *Ascaris* and *Parascaris* genomes and then carry out an analysis of conservation of final chromosome organization. Unfortunately, in spite of significant effort and approaches, the assemblies and divergent genomes made these types of analyses not possible. *Ascaris* and *Parascaris* are evolutionarily diverged in terms of their genome organization. Their chromosomes have undergone many insertions, deletions, and re-arrangement events. As shown in the whole genome comparison plot (Fig. S5-6), not a single chromosome can be aligned entirely between *Ascaris* and *Parascaris*. Thus, efforts to compare the final organization and relationships of the chromosomes to ask questions about constrained order/synteny, cis-regulation, and chromosomal organization turned out to not be possible.

**Final genome assemblies**

The assembled scaffolds for *Ascaris and Parascaris* genomes were named based on their retention or elimination following DNA elimination. Below are the designations used for the scaffolds from the four assembled genomes. The fifth genome is a re-assembly of the *Toxocara* germline genome.

*Ascaris germline genome*

415 scaffolds, 298 Mb with 13.3 Mb sequence eliminated

**AgR**: *Ascaris* germline scaffolds that are retained; 294 scaffolds, 191 Mb; example: AgR001.

**AgE**: *Ascaris* germline scaffolds that are eliminated; 85 scaffolds, 10 Mb; example: AgE01.

**AgB**: *Ascaris* germline scaffolds that have chromosomal break region(s); 36 scaffolds, 97 Mb (3.3 Mb eliminated); example: AgB01.

If a scaffold was defined as part of the sex chromosome, an “X” is added at the end of the scaffold name (e.g. AgB08X). Same for the other 3 genomes.

*Ascaris somatic genome*

Total 217 scaffolds, 280 Mb.

**AsR**: *Ascaris* somatic scaffolds that are retained; 125 scaffolds, 185 Mb; example: AsR001 (matching AgR001).

**AsB**: *Ascaris* somatic scaffolds that have telomere addition at the chromosomal break region; 39 scaffolds, 92.5 Mb; example: AsB01 (matching AgB01).

**AsU**: *Ascaris* somatic scaffolds that cannot be fully mapped to the germline assembly; 53 scaffolds, 1.8 Mb; example: AsU01X.

*Parascaris germline genome*

Total 1274 scaffolds, 253 Mb with 10.5 Mb sequence eliminated.

**PgR**: *Parascaris* germline scaffolds that are retained; 445 scaffolds, 201.6 Mb; example: PgR001X.

**PgE**: *Parascaris* germline scaffolds that are eliminated; 783 scaffolds, 9.3 Mb; example: PgE001.

**PgB**: *Parascaris* germline scaffolds that have chromosomal break region(s); 46 scaffolds, 42.5 Mb (1.2 Mb eliminated); example: PgB01.

*Parascaris somatic genome*

Total 490 scaffolds, 243 Mb.

**PsR**: *Parascaris* somatic scaffolds that are retained; 444 scaffolds, 201.6 Mb; example: PsR001X (matching PgR001X).

**PsB**: *Parascaris* somatic scaffolds that have telomere addition at the chromosomal break region; 46 scaffolds, 41.3 Mb; example: PsB01 (matching PgB01).

*Toxocara genome assembly*

Total 7,926 scaffolds, 313 Mb.

All *Toxocara* scaffolds are named with the prefix Tg (e.g. Tg0001). There are 293 Mb of retained sequence and 20 Mb of eliminated genes. We identified > 35 retained and eliminated junctions in the assembly that do not have observed telomere addition sites. These junctions are likely due to the mis-assembly caused by using the mate-pair libraries. Therefore, we did not separate *Toxocara* scaffolds into retained, eliminated, or with breaks as done for *Ascaris* and *Parascaris* assemblies.

**Genome browser**

Data are available in the UCSC Genome Browser track data hubs (<https://genome.ucsc.edu/cgi-bin/hgHubConnect>) using the ‘‘My Hubs’’ tab with the following link: <http://amc-sandbox.ucdenver.edu/User14/genomes.txt>.

There are five genomes in the genome browser. Under each genome the tracks are organized into related groups. For example, under the *Ascaris* germline genome, there are 10 groups of tracks (for each group, describe the data tracks).

1. Gene models and annotation
2. Programmed DNA elimination
3. RNA-seq data
4. Histone modification ChIP-seq data
5. Small RNA data
6. CENP-A and CENP-C ChIP-seq data
7. ATAC-seq data
8. Long Reads data
9. Comparative genomics data
10. Repetitive sequence tracks

**Characterization of the 5’ ends of *Ascaris* mRNAs**

We generated 5’ mRNA libraries that enriched for the 22 nt spliced leader known to define most of the 5’ ends of nematode trans-spliced mRNAs (Takacs et al. 1988; Maroney et al. 1995; Lasda and Blumenthal 2011). To characterize the 5’ ends of mRNAs that are not trans-spliced, we used a modified 5’ end ligation approach that samples only capped mRNA (TeloPrime Kit, Lexogen) (see Supplemental Methods). We then compared the distance observed between the 5’ ends of the mRNAs defined by the SL and TeloPrime libraries and those assembled from traditional RNA-seq for both *Ascaris* and *Parascaris*. We found most of the SL addition sites and 5’ ends of the Teloprime sequences were within 50 bases of our previously assembled transcripts derived from traditional RNA-seq (Supplemental Fig S1B). The extended 5’ ends of the mRNAs from the SL and TeloPrime libraries improve the overall quality of 5’ full-length transcripts and were incorporated into a revised transcriptome assembly (see genome browser). We note that the TeloPrime libraries generated cDNA for both non-trans-spliced and trans-spliced mRNAs. However, the efficiency of capturing trans-spliced mRNAs with a trimethyl-guanosine cap (~5%) was significantly lower than for non-trans-spliced monomethyl-guanosine capped mRNAs (~95%). To investigate the conservation of trans-spliced vs. non-trans-spliced mRNAs conserved in Ascaris and Parascaris, we compared reciprocal-best-hit orthologous genes in *Ascaris* and *Parascaris*. Most orthologous genes that are trans-spliced in *Ascaris* are also trans-spliced in *Parascaris* (Supplemental Fig S1C). We observed a lower level of conservation for the non-trans-spliced genes between the two species (Supplemental Fig S1C). However, we believe that the degree of conservation is likely underestimated since additional conserved genes may be expressed at low levels that are not identified.

**Transcripts and alternative isoforms**

Transcripts are named based on their positions in the genomic scaffolds. For example, AgB01_g001_t01 means this transcript is from scaffold AgB01, it is the first gene (g001) in the scaffold, and this is the first identified transcript isoform (t01) of the gene. Other alternative isoforms are named by changing the t01 to t02, t03 etc. *Toxocara* transcripts are named with prefix MSTRG (default from StringTie).

**Apparent expression of eliminated genes in somatic tissues**

Eleven out of the 926 eliminated genes are expressed at a high level (rpkm >= 100) in at least one of the somatic tissues (intestine, muscle or carcass). After close examination of these genes, we found that five of them are from a single scaffold marked as eliminated (AgE51) that may be mis-assembled at one of the termini as the scaffold has a stretch of sequence from the mitochondrial genome. This likely explains the very high level of expression for these genes in the somatic tissues. We therefore removed these five genes from the eliminated genes list.

Another five genes are from scaffolds that express small (300 – 600 bp) transcripts. We are not able to determine at this time whether these “eliminated” scaffolds have mis-assembly issues in these regions. However, these genes have high sequence similarity to other genes in retained genomic regions. Thus, these small transcripts are likely paralogs present in both retained and eliminated genes. Our bowtie2 mapping parameters (default settings) are able to distinguish RNA-seq reads that map to divergent regions of these paralogous genes and this mapping indicates that somatic RNA-seq reads map to retained genes and not eliminated genes. The RNA expression we observed for eliminated genes in the somatic cells are derived from highly conserved regions that have identical sequences present in both the retained and eliminated genes. Thus, we believe that these paralogous genes in the eliminated regions are mostly likely not expressed in the somatic tissues.

One highly expressed gene (AgE02_g037_t01) encodes a major sperm protein. This gene has a rpkm of 5,000 – 15,000 in various regions of testis. The expression level observed from the intestine RNA-seq is only at 225 rpkm (~2% of testis). We suspect that the RNA level in the intestine could be due to sample contamination from germ cells. A similar low percentage of contamination was also observed for other eliminated genes.

In summary, a few eliminated genes with very high levels of expression in the germline appear to be expressed in the somatic tissues. However, they are likely either expressed from duplicated copies in the retained region (paralogs) or represent low level contamination from the germline tissues. We conclude that the eliminated genes are only expressed in the germline-tissues.

***Ascaris* sex chromosomes**

Comparison of *Ascaris* sex chromosome genes with genes in *C. elegans* chromosomes suggests that the *Ascaris* sex chromosomes contain genes that are found predominantly in *C. elegans* chromosomes I, II, and X (Supplemental Fig S3C). While gene linkage is maintained in many cases between these two species (Supplemental Fig S3D), there is a very low level of overall chromosomal synteny between these two genomes. This suggests that there has been extensive genome rearrangement within chromosomes in nematodes, as has been observed in other nematodes (Ghedin et al. 2007; Desjardins et al. 2013; Hunt et al. 2016). However, there are a few scaffolds, including AgR009X, AgR014X, AgR08X and AgR18X, that correspond to mixed *C. elegans* chromosomes (Supplemental Fig S3D), suggesting they evolved from several rearrangement events between these chromosomes.

**Maternal RNA deposition**

We previously observed in *Ascaris* that few transcripts were maternally deposited and used for development. Transcription prior to pronuclear fusion and through early development appears to drive *Ascaris* early development (Wang et al. 2014). Interestingly, we found that *Parascaris* exhibits a larger number of maternally contributed transcripts and fewer zygotically transcribed genes (Supplemental Fig S4 and Supplemental Table S5) when compared to *Ascaris*. These two parasitic nematodes have almost identical early development and cell lineages, but *Parascaris* embryos develop much faster (~3 hr per cell cycle) than *Ascaris* embryos (~20 hr per cell cycle). These data suggest that *Parascaris* embryos may rely more on maternal RNA (similar to *C. elegans*) than *Ascaris* to drive early development, consistent with the view that fast-developing embryos tend to depend more on maternal RNAs and post-transcriptional regulation during early embryogenesis (Wang and Davis 2014).

**Identification of chromosomal breakage regions (CBRs)**

In a single intestine from either *Ascaris* or *Parascaris*, most of the CBRs have one or two telomere sites (Fig. 5B and Supplemental Fig S10), presumably representing the sites from the pair of chromosomes (one site if the telomere addition occurs at the same place on both chromosomes). However, for a few CBRs, there are more than two observed sites (Fig. 5B and Supplemental Fig S10). This is likely due the existence of repetitive sequences in these CBRs that confound the mapping. Indeed, we found the same set of CBRs (break_a03, break_a08, and break_a29) have > 2 observed sites in the intestine of different individuals. It is also possible that some other somatic tissue contamination in the samples may also contribute to the > 2 observed sites for some CBRs in *Ascaris* (such as break_a12 and break_a21).

We initially identified the chromosomal break regions by comparing the differences in read coverage between the sperm genomic libraries and the intestine genomic libraries of a single male *Ascaris* (Wang et al. 2012) (see Supplemental Methods). In the current work, we have more comprehensively examined the location of telomere addition sites in a large number of 7 day *Ascaris* embryos corresponding to >250,000 different embryos. In most cases within a population of these individuals, we observe many independent sites for addition of the telomere that is commensurate with the sequencing depth. However, for one break region (Supplemental Fig S10, *A. suum* mixed population, break_a22), we only observed two sites with telomere addition. This genomic locus is clearly a boundary between retained and eliminated sequence with telomere addition. Thus, we include this site as a CBR. However, we do not have an explanation for the low frequency of telomere additions at this site. Whether this could be a consequence of poor assembly in this region remains to be determined. For all 46 CBRs initially identified via read coverage in *Parascaris*, we found each has many telomere addition sites, suggesting they are all CBRs.

**Telomere addition and priming**

DNA elimination requires the generation of dsDNA breaks and the healing of the break with telomeres. To determine whether there are sequence requirements associated with healing, we compared the germline sequences in the break regions with the corresponding somatic sequences where telomere sequences were added (Supplemental Fig S11). We observed that the addition of a telomere can begin within any position of the telomeric repeat unit (TTAGGC), with a preference for Gs and Ts as the first nucleotide (Supplemental Fig S11A). Comparison of the germline and somatic sequence reveals that there is an ambiguous region around the telomere addition site that can be mapped to both the germline and telomeric sequence (Supplemental Fig S11B, yellow region). This ambiguous region has also been observed in mammalian telomere healing (Hannes et al. 2010) and has been described as a microhomology region. The observed frequency for single or dinucleotides at this microhomology region suggests there’s no bias for where the telomere sequence is added within the *Ascaris* CBR regions (Supplemental Fig S11C). In most cases, the germline sequence has been used for telomere priming during the process (Supplemental Fig S11C, right). A variant telomere unit (TTAAGC) is present as the first repeat 22% of the time followed by the (TTAGGC)n repeats.

To further determine how many nucleotides were used to initiate the healing process, we carried out simulations for four models where 0, 1, 2, or 3 nucleotides were required to prime telomere addition. The simulations and the actual somatic reads with telomeres were mapped back to the CBR sequences comparing the actual frequency for the microhomology length (dAB) (Supplemental Fig S11D). The somatic telomere data match the one nucleotide priming (NP = 1) simulation, suggesting that most of the healing is initiated with a single nucleotide. Further analysis on the simulated and actual data indicates that telomere priming may also be initiated with dinucleotides, in particular, the AA and TA dinucleotides (Supplemental Fig S11E). The AA dinucleotide is required for addition of the first telomere variant AAGCTT. The use of this variant telomeric repeat may be related to the doubling of possible sites that can be used from six to twelve (Supplemental Fig S11E). However, we only see two main units (AAGCTT and AGCTTA) in the data. Our data suggest that while the AGCTTA unit is primed with mostly one nucleotide, the AAGCTT unit is exclusively primed with the AA dinucleotides (Supplemental Fig S11E). These data suggest that the use of the telomere variant is to provide additional sites for dinucleotide priming events. Telomere addition appears independent of chromosome sequence using only a single nucleotide as the priming mechanism. This likely is necessary to enable the healing of any DNA breaks that form and may further suggest that the breaks have no common sequences. Dinucleotide priming might provide more efficient and robust priming than the single nucleotide and thus could enhance the overall healing events. Thus, the addition of a telomere variant provides a mechanism to allow additional dinucleotides priming to occur and thus contribute to the telomere healing process.

**Supplemental Materials and Methods**

**Parasite samples**

*Ascaris suum.* Collection of *Ascaris* *suum* germline and somatic tissues were described previously (Wang et al. 2011; Wang et al. 2012; Wang et al. 2014). Briefly, adult *Ascaris* were collected from freshly isolated pig intestines. A single male and female *Ascaris* were dissected and the spermatids, intestine, testis, and the remaining tissue (carcass, which includes muscle, hypodermis, pharynx, and neurons) collected for the male and the ovary/oviduct, uterus, intestine, and carcass collected for the female. These samples were frozen in liquid nitrogen, and stored at -80C. *Ascaris* embryos were incubated at 30 C to obtain different developmental stages (Wang et al. 2014).

*Ascaris lumbricoides. Ascaris* from humans were collected as described (Easton et al. 2016) in five villages in Bungoma County, western Kenya. Briefly, households were randomly selected to be surveyed, and the stool samples were tested for helminth eggs by Kato Katz method (Katz et al. 1972). Individuals who were egg-positive were treated with 400 mg albendazole (ALB). Following treatment, stool samples produced by each participant were collected by community health workers every day for seven days. *A. lumbricoides* worms were isolated from stools at a field laboratory, kept at 4 C, transferred to the district hospital at the end of the day, and stored frozen at -15 C. These worm samples were then shipped frozen to the NIH in Bethesda, MD, USA for further processing. Upon arrival at the NIH, samples were stored at -80C.

*Parascaris univalens. Parascaris* samples were collected as described (Nielsen et al. 2014). The animal work was approved by the University of Kentucky’s Institutional Animal Care and Use Committee (IACUC), under protocol number 2012–1046. Live male and female *Parascaris* specimens were collected from six 4–7-month-old foals. Dissection, sample isolation and storage, and DNA preparation were as described for *Ascaris* samples. *Parascaris* embryos were incubated at 37 C to obtain various developmental stages.

**Nucleic acid isolation**

*DNA*. The dissected, frozen samples were ground to a fine powder with liquid nitrogen in a mortar and pestle, digested overnight at 55 C with 0.5% SDS and 150 μg/ml proteinase K in buffer (50 mM Tris-HCl, 100 mM EDTA, and 100 mM NaCl) and the DNA was isolated using phenol-chloroform extraction and ethanol precipitation. To extract high molecular weight genomic DNA for fosmid libraries, single molecule sequencing (PacBio) and optical mapping (BioNano), nuclei were first isolated (Kang et al. 2016; Kang et al. 2017) from either mixed testis or staged embryos (see Supplemental Table S1). The isolated nuclei were either processed with a QIAGEN Genomic-tip 500/G (Cat. No. 10262) to extract DNA for fosmid and PacBio sequencing or embedded in agarose plugs for optical mapping (see below).

*RNA*. Total RNA was extracted from either fresh or -80 C frozen samples (ground to a fine powder with liquid nitrogen in a mortar and pestle) using Trizol (Invitrogen) and ribosome RNAs were depleted using Ribo-zero kits (Human/Mouse/Rat, Epicentre MRZH116).

**Genome sequencing**

*Illumina*. Paired-end and mate-pair libraries were constructed using standard Illumina protocols and sequenced on the Illumina GAIIx or HiSeq platforms, with genome coverage in the range of ~100-300 X for the four genomes (see Supplemental Table S1, green area). Analysis of breakpoint regions in 7-day embryos and *Parascaris* larvae L1 embryos were carried out using sequences derived from genome libraries prepared with the Illumina Nextera protocol and sequenced on the Illumina HiSeq 4000 and NextSeq 500, with genome coverage of ~ 130 X each for *Ascaris* and *Parascaris* (see Supplemental Table S1).

*PacBio*. PacBio sequencing was carried out at the University of Washington PacBio Sequencing Services facility (<https://pacbio.gs.washington.edu/)> using P6-C4 chemistry (see Supplemental Table S1, blue area).

*Fosmid*. High quality genomic DNA was sheared by repeated pipetting, end-repaired, DNA fragments of ~35-45 kb cloned into the pNGS FOS vector (Lucigen, NxSeq™ 40 kb Mate-Pair Cloning Kit, Cat. No. 42028-1), and the DNA packaged in vitro using bacteriophage lambda extracts (Epicentre, MaxPlax™ Lambda Packaging Extracts, Cat. No. MP5105). The packaged fosmid clones were transfected into Replicator FOS cells followed by plating onto agar plates with chloramphenicol. Colonies from plates were recovered en masse, large pools of fosmid DNA purified, and then digested with RsaI (NEB, Cat. No. R0167S). Random 8-9 kb DNA fragments including those that contain the fosmid end sequences were gel-purified, cyclized, and amplified using specific primers with sequencing adaptors that include the fosmid end sequences. The resulting 350-500 bp PCR products corresponding to the ends of the fosmids were sequenced on Illumina HiSeq2000 with paired-end 2x100 bp read length (see Supplemental Table S1, yellow area).

**Optical mapping**

Nuclei were isolated from 7 day embryos (256 cell post-DNA elimination embryos) and testes as described (Kang et al. 2016). Nuclei were suspended and frozen in nuclei storage buffer at -80 C (20% glycerol, 25 mM Tris-HCL pH 8.0, 2.5 mM MgCl2, 0.025% 2-mercaptoethanol, 0.5 mM DTT, 0.5 mM EDTA). Upon thawing, nuclei were washed with nuclei buffer (10 mM Tris-HCl pH 7.4, 10 mM NaCl, 3 mM MgCl2), resuspended in PBS, and embedded in thin low-melting-point agarose plugs (CHEF Genomic DNA Plug Kit, Bio-Rad). Frozen pelleted sperm cells were resuspended in PBS and directly embedded in thin low-melting-point agarose plugs.Subsequent handling of the DNA followed a BioNano Genomics recommended protocol. The agarose plugs were incubated with proteinase K at 50°C overnight, the plugs washed, and then solubilized with 0.4 U of GELase (Epicentre). The resulting DNA solution was subjected to 2.5 hr of drop-dialysis against TE buffer, quantified using a Quant-iTdsDNA Assay Kit (Invitrogen/Molecular Probes), and the DNA quality was assessed using pulsed-field gel electrophoresis.

The DNA was labeled using the IrysPrep Reagent Kit (BioNano Genomics). Specifically, 300 ng of purified genomic DNA was nicked with 5 U of nicking endonuclease Nt.BspQI or 6 U of Nt.BbvCI (New England BioLabs (NEB)) at 37° for 2 hr in buffers BNG3 or BNG2, respectively. The nicked DNA was labeled with a fluorescent-dUTP nucleotide analog using Taq polymerase (NEB) for 1 hr at 72°. After labeling, the nicks were filled in with polymerase in the presence of dNTPs. The backbone of fluorescently labeled DNA was counterstained with YOYO-1 (Invitrogen).

The DNA was loaded onto the BioNano Genomics IrysChip, linearized with either Nt.BspQI or Nt.BbvCI, and visualized by the Irys system. The DNA backbone length and locations of fluorescent labels along each molecule were detected using Irys software (v2.0). Single-molecule maps were assembled *de novo* into genome maps using IrysSolve software tools developed at BioNano Genomics (Assembler and RefAligner, tools.3625.3686) (Cao et al. 2014).

**Genome assembly**

For both *Ascaris* and *Parascaris*, high quality contigs and scaffolds were first de-novo assembled using Velvet (v1.2.10) (Zerbino and Birney 2008) as described (Wang et al. 2012) using Illumina reads for the germline and somatic genomes, respectively (see Supplemental Table S1). Gaps in the scaffolds were closed with GapCloser (v1.12) from SOAPdenovo2 (Luo et al. 2012). These initially assembled contigs and scaffolds were further bridged with error corrected (ECTools [<https://github.com/jgurtowski/ectools>] and PBcR (Celera Assembler v8.2) (Berlin et al. 2015) PacBio reads using SSPACE-LongRead (v1.1) (Boetzer and Pirovano 2014). Additional gaps were filled with GapCloser and PBJelly (PBSuite_15.8.24) (English et al. 2012). For the *Ascaris* somatic genome, the assembly was further scaffolded with fosmid reads using SSPACE_Standard (v3.0) (Boetzer et al. 2011) followed by additional gap closure.

The assembled genomes were digested in silico with restriction enzymes (BspQI and BbvCI) to generate restriction maps. These maps were compared sequentially to the two optical maps generated from the BioNano Genomics Irys using RefAligner (tools.3625.3686) (<http://www.bnxinstall.com/irysview/irysView.htm>). Regions from the assembled genomes that were consistent with the optical maps were kept as confirmed regions while the unmatched regions were subjected to further refinement. Illumina reads that did not map to the confirmed regions were extracted and used to carry out additional de novo assembly, scaffolding, and validation procedures as described above. This process yields additional assembled sequences that corresponded to the optimal maps and other data. This process was iterated until no additional improved sequence assemblies were generated and then a final scaffolding step was carried out to generate the final assemblies. The *Parascaris* germline genome is ~2.5 Gb in size and is comprised of ~90% repetitive sequence. The *Parascaris* germline genome assembly was facilitated by using the *Parascaris* somatic genome as a reference. Finally, we mapped all available Illumina reads and high-level scaffolding data (PacBio, Fosmid, and BioNano) back to the genome assemblies. This mapping is available as tracks in the genome browser to allow users to assess the quality of genomic regions of interest in the assembled genomes.

*Toxocara canis* germline genome assembly used publicly available data from both an immature (Zhu et al. 2015) and a mature adult *T. canis* male (50 Helminth genome initiative at the Wellcome Trust Sanger Institute; http://www.sanger.ac.uk/science/collaboration/50hgp). Reads were pre-assembled using MaSuRCA (v3.13b) (Zimin et al. 2013) to generate “super-reads”. These super-reads were further assembled using the Celera Assembler (v8.3rc2) (Myers et al. 2000). The assembly was further scaffolded with mate pair sequences using SSPACE_Standard (v3.0) (Boetzer et al. 2011) followed by additional gap closure using GapFiller (v1.1) (Nadalin et al. 2012).

**Repetitive sequence identification**

Repetitive sequences were identified using the RepeatModeler tool and RepeatMasker using default settings (Smit, AFA, Hubley, R & Green, P. *RepeatMasker Open-4.7*. 2013-2015 <http://www.repeatmasker.org)>. Repetitive regions are available in the genome browser within the repeat track.

**Gene prediction and annotation**

Comprehensive RNA-seq data was used to assemble RNA transcripts and their alternative isoforms. We first used Tophat2 (v2.0.13, -r 200) (Kim et al. 2013), Cufflinks (v2.2.0, --min-isoform-fraction 0.15 --pre-mrna-fraction 0.20 --max-intron-length 100000 --min-intron-length 100) (Trapnell et al. 2012) and StringTie (v1.2.2, -m 75 -c 5 -F 1 -T 1 -f 0.1) (Pertea et al. 2015) to identify the initial transcripts. To reduce potential false positive transcripts (RNA-seq noise), we evaluated these transcripts based on their expression level, intron and exon structure, protein coding regions, and gene annotation. Transcripts meeting at least one of the following criteria were considered as a bona fide mRNA transcript: (1). Transcript has a max expression >= 20 RPKM in any stage/tissue or has an average expression of >= 2 RPKM, (2). Transcript has 3 or more exons with RNA length >= 500 bp, (3). Transcript has > 50% of the sequence encoding a protein or the encoded protein length is >= 300 aa, or (4). Transcript has a Swiss-Prot annotation.

We also used the ab initio gene prediction tool Augustus (v2.7) (Stanke et al. 2006) to further improve the genome annotation. Gene models for the conserved proteins (matching CEGMA proteins [v2.5] (Parra et al. 2007) were used to train Augustus and then were used to predict genes from the whole genome (see genome browser). Augustus gene models without identified RNA-seq transcripts (~5% for both *Ascaris* and *Parascaris*) were included in the final genome annotation. Finally, those transcripts with shared exons on the same strand were identified as alternative spliced isoforms from a gene, and the transcript with highest level of expression was used as the representative transcript of the gene for expression and other analysis. The transcripts were annotated in succession with previous *Ascaris* annotation in NCBI GenBank (Benson et al. 2017), Swiss-Prot (Bienert et al. 2017) and the UniProt database (The UniProt 2017). Gene models from previous studies (Jex et al. 2011; Wang et al. 2012) were also transferred to and compared with the current *Ascaris* genome using RATT (http://ratt.sourceforge.net/) (Otto et al. 2011) and BLAT (v35x1) (Kent 2002) tools (see Supplemental Table S7).

**5’ mRNA libraries, sequencing and analysis**

To define the 5’ ends of mRNAs in *Ascaris* and *Parascaris*, we constructed Teloprime (Lexogen) libraries that select for RNAs with a 5’ cap and spliced leader enriched libraries. Two independent approaches were used for the spliced leader enriched libraries. In the first, we isolated polyadenylated RNA, chemically fragmented the RNA, and generated first strand cDNA using a random primer adaptor (TGACTGGAGTTCAGACGNNNNNN). Second strand cDNA was synthesized using a spliced leader adaptor (CTCTTTCCCTACACGACGCTCTTCCGATCTNNNNATGGTTTAATTACCCAAGTTTGAGTGAG) and the cDNA amplified with sequences corresponding to the adaptors and containing the Illumina adaptors. About 1.3 million *Ascaris* reads were obtained using Illumina MiSeq. In the second method, ribosomal RNA was removed from total RNA using Ribo-Zero (Human/Mouse/Rat, Epicentre MRZH116) and first strand cDNA synthesized with a random primer adaptor (TGACTGGAGTTCAGACGNNNNNN). Second strand cDNA was synthesized using a spliced leader adaptor (CTCTTTCCCTACACGACGCTCTTCCGATCTNNNNATGGTTTAATTACCCAAGTTTGAGTGAG) and the cDNA amplified with adaptors containing the Illumina adaptors with short extension times. cDNA with Illumina adaptors in the size range of 250-350 bp were gel purified and used for sequencing on an Ilumina Hi-Seq 4000.

To obtain sequences of the 5’ ends of non-trans-spliced mRNAs, we used a Lexogen custom adaptation of the TeloPrime Full-Length cDNA Amplification Kit, a 5‘ mRNA Seq TeloPrime Add-on Kit (Lexogen). Following synthesis of full-length cDNA, third strand cDNA was synthesized using a random primer adaptor. The cDNA was then amplified using an Illumina adaptor to the 5’ teloprime primer and to the random primer. cDNA products in the size range of 250-350 bp were gel purified and used for sequencing on an Ilumina Hi-Seq 4000.

**RNA-seq and expression analysis**

Transcriptomes for *Ascaris suum* germline tissues and *Parascaris univalens* samples were done as previously described (Wang et al. 2014). RNA-seq libraries were prepared using the TotalScript RNA-seq kit (Epicentre, TSRNA1296) and were sequenced on an Illumina HiSeq 2500. Additional RNA-seq data from our previous studies (Wang et al. 2012; Wang et al. 2014) were incorporated into the analyses.

RNA sequencing reads were mapped to the reference genomes using Tophat2 (Kim et al. 2013) and the expression level (RPKM) for transcripts (see below) were derived using Cufflinks (Trapnell et al. 2012). The expression levels (RPKM) were further converted to z-scores for developmental expression profile analysis as described (Wang et al. 2014). Only transcripts with average RPKM >= 5 across the stages or max RPKM >= 20 were selected to be illustrated in the heatmaps (Fig. 3D and Supplemental Fig S4) using the heatmap.2 package in R. The orders for the clustered gene groups were manually adjusted to match the developmental stages and events.

**ChIP-seq and analysis**

ChIP-seq data from our previous study (Kang et al. 2016) were mapped to the new *Ascaris* reference genomes as described (Kang et al. 2016). To define centromeric regions on *Ascaris* chromosomes, we used a 20 kb sliding window (with 4 kb slide increment) on CENP-A ChIP-seq data from 5-day embryos. Actively transcribed regions (defined by H3K36me3 enrichment and transcript levels) are also present in the same regions (Fig. 1A). Heterochromatic regions were defined as peak regions of H3K9me3 ChIP-seq using the MACS2 (Zhang et al. 2008) callpeak module (-p 1e-8 --broad) with manual inspection and adjustments. All ChIP-seq data are made available in the genome browser with the total read coverage for each track normalized to 3 Gb (~ 10x of the genome) (see Fig. 1B and the genome browser).

**Sex chromosome identification and expression analysis**

*Ascaris* has an estimated 6 sex chromosomes in the germline and 8 sex chromosomes in somatic cells following DNA elimination (Niedermaier and Moritz 2000). To identify sex chromosomes in the genome assemblies, we generated and examined genomic reads from the intestines of a female and a male *Ascaris*. The sex chromosomes were identified by increased 2-fold coverage in females compared to males (see Supplemental Fig S2A). *Parascaris* sex chromosomes were also defined using the same approach (see Supplemental Fig S2B). To compare the level of RNA expression in the autosomes vs. sex chromosomes during development, we used the average gene expression RPKM for all *Ascaris* genes encoded in the autosomes and sex chromosomes identified (see Fig. 2B, Supplemental Fig S2 and Supplemental Table S6).

**Genome synteny analysis**

To carry out genome synteny analysis with other nematodes, we compared the *Ascaris suum* assembly to 9 other nematode genome assemblies that were either chromosome level assemblies or had good N50 values and from different nematode clades (see Supplemental Table S8). Nematode genome data were retrieved from WormBase ParaSite (Howe et al. 2016) (<http://parasite.wormbase.org/index.html> version WBPS7). For each of these 9 nematodes, we used blastp (1e-8 cutoff) (Altschul et al. 1997) to compare their protein sequences to the *Ascaris* proteome. The matched proteins and their positions in the genomes were used as input for DAGchainer (r02-06-2008) (-A 3, number of aligned pairs >= 3) (Haas et al. 2004) to identify syntenic regions between the genomes. The comparison of the *Ascaris* and *Parascaris* genomes is illustrated in a dot plot (Supplemental Fig S5) and syntenic regions are also shown in a circos (v0.68) (Krzywinski et al. 2009) (Fig. 4A) and other plots (Fig. 4B and Supplemental Fig S6). The syntenic information is also available in genome browser tracks.

**Orthologous genes groups and analysis**

We used OrthoMCL (v5) (Li et al. 2003) to identify orthologous genes groups between *Ascaris*, *Parascaris*, *Toxocara*, and *C. elegans*. *Toxocara* and *C. elegans* data were retrieved from WormBase ParaSite (v8.0) (Howe et al. 2016). After all-versus-all blastp (1e-4 cutoff) comparisons, we clustered the orthologous groups using an inflation index I = 2.5. There are 13,659 orthologous groups and 21,315 singletons identified (see Supplemental Table S9). The relationship of the orthologous groups (and singletons) is illustrated in a venn diagram (Fig. 4C).

**Chromosomal break region identification, motif analysis, and comparisons between nematodes**

For *Ascaris, Parascaris*, and *Toxocara*, the DNA breakpoints were identified as described (Wang et al. 2012). Briefly, reads from the germline and somatic tissues were mapped back to the germline genome. Genomic regions covered with equal levels of germline and somatic read coverage were considered as retained DNA while regions only covered by germline reads were considered as eliminated sequences. In scaffolds with both retained and eliminated DNA, the junctions between retained and eliminated DNA were defined as DNA breakpoints. In addition, the ends of these DNA breakpoints have telomere sequences (TTAGGC)n in the somatic genomes (see Fig. 5 and Supplemental Table S10). For *A. lumbricoides*, the breakpoints were identified by mapping genomic reads from *A. lumbricoides* somatic tissue (intestine) back to *A. suum* genomes. The break sites were confirmed by using somatic reads that have both unique and telomere sequences.

**Motif and Z DNA analysis of chromosomal break regions (CBRs)**

Chromosomal break regions including 5 kb on either side of the telomere addition sites were used for sequence motif prediction using the MEME Suite (v4.11.1) (Bailey et al. 2009), Z-DNA prediction by Z-Hunt (v2) (Ho et al. 1986), and dot plot analysis for palindromes and repetitive sequences.

Nematode CBRs were compared by using a 10-kb window flanking the break sites (see Supplemental Table S10). The sequences were compared with tblastx (1e-5 cutoff) and regions that have over 10 blast high-scoring segment pairs (HSPs) were defined as conserved (Supplemental Table S10).

**Identification and comparison of eliminated sequences in *Ascaris*, *Parascari*s*, and Toxocara.***

Identification of eliminated sequences was carried out as described in Wang et al (2012). Briefly, germline genomic regions with a read coverage reduction (> 5-fold) in the somatic tissues were identified, merged and then manually inspected to define eliminated sequences*.* Satellite or repetitive sequences were identified (see above) and their copy numbers estimated based on read coverage (Supplemental Table S3). For the unique sequences eliminated, we compared the encoded genes using blastp (1e-8 cutoff) to identify the conserved genes that are eliminated (Supplemental Table S11). These genes were further analyzed using RNA-seq expression profiles (Fig. 5A-B and Supplemental Table S11). To identify the enriched Gene Ontology groups, we used the conserved eliminated genes as the Test-Set and the retained genes as Reference-Set to perform the Fisher’s Exact Test enrichment analysis using Blast2Go (v4.0) (Gotz et al. 2008). This enrichment analysis was done on *Ascaris*, *Parascaris*, *Toxocara* and the combined datasets (see Supplemental Table S12).

**ATAC-seq and analysis**

We used ~0.5 - 1 million nuclei to make the ATAC-seq libraries (Buenrostro et al. 2013). Briefly, embryos or tissues were washed twice in PBS at 4 C, resuspended in ice cold lysis buffer (10 mM Tris/HCl pH 7.4, 10 mM NaCl, 3 mM MgCl2, 0.1% Triton X-100 and 0.1% NP-40) and transferred to a Wheaton glass dounce for homogenization (tight, ~50 strokes). The nuclei were pelleted at 4 C by centrifugation at 1,000 g for 10 min and then Tn5 transposase added (from Illumina, Cat. No. FC-121-1030). The transposase reactions were purified using Qiagen MinElute PCR purification kit (Cat. No. 28006), PCR amplified with 10-12 cycles (NEB Phusion Cat. No. E0553L), and sequenced on an Illumina HiSeq2500 single-end (1x125 bp) or paired-end (2x125 bp) run.

ATAC-seq reads were mapped to the genome using bowtie2 (v2.1.0) (Langmead and Salzberg 2012), and then further processed with SAMtools (v1.5) (Li et al. 2009), and BEDtools (v2.26.0) (Quinlan 2014). ATAC-seq data are available in the genome browser with total read coverage for each track normalized to 3 Gb (~10x of the genome) (see Fig. 6A-B and the genome browser). ATAC-seq read coverage for all 40 *Ascaris* breakpoints and 10 kb flanking regions were calculated and plotted in R (v3.3.2) (Fig. 6C).

**References**

Altschul SF, Madden TL, Schaffer AA, Zhang J, Zhang Z, Miller W, Lipman DJ. 1997. Gapped BLAST and PSI-BLAST: a new generation of protein database search programs. *Nucleic Acids Res* **25**: 3389-3402.

Bailey TL, Boden M, Buske FA, Frith M, Grant CE, Clementi L, Ren J, Li WW, Noble WS. 2009. MEME SUITE: tools for motif discovery and searching. *Nucleic Acids Research* **37**: W202-208.

Benson DA, Cavanaugh M, Clark K, Karsch-Mizrachi I, Lipman DJ, Ostell J, Sayers EW. 2017. GenBank. *Nucleic Acids Res* **45**: D37-D42.

Berlin K, Koren S, Chin CS, Drake JP, Landolin JM, Phillippy AM. 2015. Assembling large genomes with single-molecule sequencing and locality-sensitive hashing. *Nat Biotechnol* **33**: 623-630.

Bienert S, Waterhouse A, de Beer TA, Tauriello G, Studer G, Bordoli L, Schwede T. 2017. The SWISS-MODEL Repository-new features and functionality. *Nucleic Acids Res* **45**: D313-D319.

Boetzer M, Henkel CV, Jansen HJ, Butler D, Pirovano W. 2011. Scaffolding pre-assembled contigs using SSPACE. *Bioinformatics* **27**: 578-579.

Boetzer M, Pirovano W. 2014. SSPACE-LongRead: scaffolding bacterial draft genomes using long read sequence information. *BMC Bioinformatics* **15**: 211.

Buenrostro JD, Giresi PG, Zaba LC, Chang HY, Greenleaf WJ. 2013. Transposition of native chromatin for fast and sensitive epigenomic profiling of open chromatin, DNA-binding proteins and nucleosome position. *Nature methods* **10**: 1213-1218.

Cao H, Hastie AR, Cao D, Lam ET, Sun Y, Huang H, Liu X, Lin L, Andrews W, Chan S et al. 2014. Rapid detection of structural variation in a human genome using nanochannel-based genome mapping technology. *GigaScience* **3**: 34.

Desjardins CA, Cerqueira GC, Goldberg JM, Dunning Hotopp JC, Haas BJ, Zucker J, Ribeiro JM, Saif S, Levin JZ, Fan L et al. 2013. Genomics of Loa loa, a Wolbachia-free filarial parasite of humans. *Nat Genet* **45**: 495-500.

Easton AV, Oliveira RG, O'Connell EM, Kepha S, Mwandawiro CS, Njenga SM, Kihara JH, Mwatele C, Odiere MR, Brooker SJ et al. 2016. Multi-parallel qPCR provides increased sensitivity and diagnostic breadth for gastrointestinal parasites of humans: field-based inferences on the impact of mass deworming. *Parasit Vectors* **9**: 38.

English AC, Richards S, Han Y, Wang M, Vee V, Qu J, Qin X, Muzny DM, Reid JG, Worley KC et al. 2012. Mind the gap: upgrading genomes with Pacific Biosciences RS long-read sequencing technology. *PLoS One* **7**: e47768.

Ghedin E, Wang S, Spiro D, Caler E, Zhao Q, Crabtree J, Allen JE, Delcher AL, Guiliano DB, Miranda-Saavedra D et al. 2007. Draft genome of the filarial nematode parasite Brugia malayi. *Science* **317**: 1756-1760.

Gotz S, Garcia-Gomez JM, Terol J, Williams TD, Nagaraj SH, Nueda MJ, Robles M, Talon M, Dopazo J, Conesa A. 2008. High-throughput functional annotation and data mining with the Blast2GO suite. *Nucleic Acids Res* **36**: 3420-3435.

Haas BJ, Delcher AL, Wortman JR, Salzberg SL. 2004. DAGchainer: a tool for mining segmental genome duplications and synteny. *Bioinformatics* **20**: 3643-3646.

Hannes F, Van Houdt J, Quarrell OW, Poot M, Hochstenbach R, Fryns JP, Vermeesch JR. 2010. Telomere healing following DNA polymerase arrest-induced breakages is likely the main mechanism generating chromosome 4p terminal deletions. *Human mutation* **31**: 1343-1351.

Ho PS, Ellison MJ, Quigley GJ, Rich A. 1986. A computer aided thermodynamic approach for predicting the formation of Z-DNA in naturally occurring sequences. *EMBO J* **5**: 2737-2744.

Howe KL, Bolt BJ, Shafie M, Kersey P, Berriman M. 2016. WormBase ParaSite - a comprehensive resource for helminth genomics. *Mol Biochem Parasitol* doi:10.1016/j.molbiopara.2016.11.005.

Hunt VL, Tsai IJ, Coghlan A, Reid AJ, Holroyd N, Foth BJ, Tracey A, Cotton JA, Stanley EJ, Beasley H et al. 2016. The genomic basis of parasitism in the Strongyloides clade of nematodes. *Nat Genet* doi:10.1038/ng.3495.

Jex AR, Liu S, Li B, Young ND, Hall RS, Li Y, Yang L, Zeng N, Xu X, Xiong Z et al. 2011. Ascaris suum draft genome. *Nature* **479**: 529-533.

Kang Y, Wang J, Davis R. 2017. Nuclei Isolation from *Ascaris* Nematodes. *Bio-protocol*.

Kang Y, Wang J, Neff A, Kratzer S, Kimura H, Davis RE. 2016. Differential Chromosomal Localization of Centromeric Histone CENP-A Contributes to Nematode Programmed DNA Elimination. *Cell reports* **16**: 2308-2316.

Katz N, Chaves A, Pellegrino J. 1972. A simple device for quantitative stool thick-smear technique in Schistosomiasis mansoni. *Revista do Instituto de Medicina Tropical de Sao Paulo* **14**: 397-400.

Kent WJ. 2002. BLAT--the BLAST-like alignment tool. *Genome Res* **12**: 656-664.

Kim D, Pertea G, Trapnell C, Pimentel H, Kelley R, Salzberg SL. 2013. TopHat2: accurate alignment of transcriptomes in the presence of insertions, deletions and gene fusions. *Genome Biol* **14**: R36.

Krzywinski M, Schein J, Birol I, Connors J, Gascoyne R, Horsman D, Jones SJ, Marra MA. 2009. Circos: an information aesthetic for comparative genomics. *Genome Res* **19**: 1639-1645.

Langmead B, Salzberg SL. 2012. Fast gapped-read alignment with Bowtie 2. *Nat Methods* **9**: 357-359.

Lasda EL, Blumenthal T. 2011. Trans-splicing. *Wiley Interdiscip Rev RNA* **2**: 417-434.

Li H, Handsaker B, Wysoker A, Fennell T, Ruan J, Homer N, Marth G, Abecasis G, Durbin R, Genome Project Data Processing S. 2009. The Sequence Alignment/Map format and SAMtools. *Bioinformatics* **25**: 2078-2079.

Li L, Stoeckert CJ, Jr., Roos DS. 2003. OrthoMCL: identification of ortholog groups for eukaryotic genomes. *Genome Res* **13**: 2178-2189.

Luo R, Liu B, Xie Y, Li Z, Huang W, Yuan J, He G, Chen Y, Pan Q, Liu Y et al. 2012. SOAPdenovo2: an empirically improved memory-efficient short-read de novo assembler. *Gigascience* **1**: 18.

Maroney PA, Denker JA, Darzynkiewicz E, Laneve R, Nilsen TW. 1995. Most mRNAs in the nematode Ascaris lumbricoides are trans-spliced: a role for spliced leader addition in translational efficiency. *Rna* **1**: 714-723.

Myers EW, Sutton GG, Delcher AL, Dew IM, Fasulo DP, Flanigan MJ, Kravitz SA, Mobarry CM, Reinert KH, Remington KA et al. 2000. A whole-genome assembly of Drosophila. *Science* **287**: 2196-2204.

Nadalin F, Vezzi F, Policriti A. 2012. GapFiller: a de novo assembly approach to fill the gap within paired reads. *BMC Bioinformatics* **13 Suppl 14**: S8.

Niedermaier J, Moritz KB. 2000. Organization and dynamics of satellite and telomere DNAs in Ascaris: implications for formation and programmed breakdown of compound chromosomes. *Chromosoma* **109**: 439-452.

Nielsen MK, Wang J, Davis R, Bellaw JL, Lyons ET, Lear TL, Goday C. 2014. Parascaris univalens--a victim of large-scale misidentification? *Parasitology research* **113**: 4485-4490.

Otto TD, Dillon GP, Degrave WS, Berriman M. 2011. RATT: Rapid Annotation Transfer Tool. *Nucleic Acids Res* **39**: e57.

Parra G, Bradnam K, Korf I. 2007. CEGMA: a pipeline to accurately annotate core genes in eukaryotic genomes. *Bioinformatics* **23**: 1061-1067.

Pertea M, Pertea GM, Antonescu CM, Chang TC, Mendell JT, Salzberg SL. 2015. StringTie enables improved reconstruction of a transcriptome from RNA-seq reads. *Nat Biotechnol* **33**: 290-295.

Quinlan AR. 2014. BEDTools: The Swiss-Army Tool for Genome Feature Analysis. *Curr Protoc Bioinformatics* **47**: 11 12 11-34.

Stanke M, Keller O, Gunduz I, Hayes A, Waack S, Morgenstern B. 2006. AUGUSTUS: ab initio prediction of alternative transcripts. *Nucleic Acids Res* **34**: W435-439.

Takacs AM, Denker JA, Perrine KG, Maroney PA, Nilsen TW. 1988. A 22-nucleotide spliced leader sequence in the human parasitic nematode Brugia malayi is identical to the trans-spliced leader exon in Caenorhabditis elegans. *Proc Natl Acad Sci U S A* **85**: 7932-7936.

The UniProt C. 2017. UniProt: the universal protein knowledgebase. *Nucleic Acids Res* **45**: D158-D169.

Trapnell C, Roberts A, Goff L, Pertea G, Kim D, Kelley DR, Pimentel H, Salzberg SL, Rinn JL, Pachter L. 2012. Differential gene and transcript expression analysis of RNA-seq experiments with TopHat and Cufflinks. *Nat Protoc* **7**: 562-578.

Wang J, Czech B, Crunk A, Wallace A, Mitreva M, Hannon GJ, Davis RE. 2011. Deep small RNA sequencing from the nematode Ascaris reveals conservation, functional diversification, and novel developmental profiles. *Genome Res* **21**: 1462-1477.

Wang J, Davis RE. 2014. Contribution of transcription to animal early development. *Transcription* **5**: e967602.

Wang J, Garrey J, Davis RE. 2014. Transcription in pronuclei and one- to four-cell embryos drives early development in a nematode. *Curr Biol* **24**: 124-133.

Wang J, Mitreva M, Berriman M, Thorne A, Magrini V, Koutsovoulos G, Kumar S, Blaxter ML, Davis RE. 2012. Silencing of germline-expressed genes by DNA elimination in somatic cells. *Dev Cell* **23**: 1072-1080.

Zerbino DR, Birney E. 2008. Velvet: algorithms for de novo short read assembly using de Bruijn graphs. *Genome Res* **18**: 821-829.

Zhang Y, Liu T, Meyer CA, Eeckhoute J, Johnson DS, Bernstein BE, Nusbaum C, Myers RM, Brown M, Li W et al. 2008. Model-based analysis of ChIP-Seq (MACS). *Genome Biol* **9**: R137.

Zhu XQ, Korhonen PK, Cai H, Young ND, Nejsum P, von Samson-Himmelstjerna G, Boag PR, Tan P, Li Q, Min J et al. 2015. Genetic blueprint of the zoonotic pathogen Toxocara canis. *Nature communications* **6**: 6145.

Zimin AV, Marcais G, Puiu D, Roberts M, Salzberg SL, Yorke JA. 2013. The MaSuRCA genome assembler. *Bioinformatics* **29**: 2669-2677.
