# Supplementary material for: Comparative genome analysis of programmed DNA elimination in nematodes
Source: HighWire-hosted journal article supplement (doi:10.1101/gr.225730.117), 2017-11-08
Supplement: Supplemental_Table_S1.xlsx [file Supplemental_Table_S1.xlsx]

## Sheet: Table S1a - data for assemblies
Table S1a. Data for genome assemblies and analysis
Genomes	Genomic DNA Source *	Sequencing Type and Platform	Insertion Size or Average Length	Reads (million)	Genome Coverage (x)	Note
	Male #1 spermatids	2 x 150 bp; Illumina	360 bp	134	51	Previous Work**
	Male #1 spermatids	2 x 250 bp; Illumina	550 bp	135	84	Current Work
	Male #1 testis	2 x 100 bp; Illumina	5 kb (mate-pair)	250	80	Previous Work**
Ascaris germline	Male testis (mixed)	PacBio P6-C4	average 10.5 kb	0.78	25	Current Work
	4-cell embryos (population)	PacBio P6-C4	average 10.5 kb	0.32	9	Current Work
	Male testis (mixed)	BioNano (BspQI)	average 197 kb	0.289	170	Current Work
	Male spermatids (mixed)	BioNano (BbvCl)	average 171 kb	0.401	205	Current Work
	Male #1 intestine	2 x 150 bp; Illumina	360 bp	108	53	Previous Work**
	Male #1 intestine	2 x 100 bp; Illumina	480 bp	490	182	Previous Work**
	Male intestine (mixed)	2 x 250 bp; Illumina	550 bp	111	80	Current Work
	7day embryos (population)	2 x 150 bp; Illumina	550 bp	326	140	Current Work
Ascaris soma	7day embryos (population)	PacBio P6-C4	average 5.5 kb	1.51	28	Current Work
	7day embryos (population)	Fosmid ends; Illumina	average 37 kb	0.323***	41***	Current Work
	7day embryos (population)	BioNano (BspQI)	average 223 kb	0.224	172	Current Work
	7day embryos (population)	BioNano (BbvCl)	average 229 kb	0.409	322	Current Work
Parascaris germline	Male #1 testis	2 x 100 bp; Illumina	450 bp	1468	48	Current Work
	Male #1 testis	2 x 125 bp; Illumina	450 bp	1612	66	Current Work
	Male #1 intestine	2 x 100 bp; Illumina	450 bp	264	70	Current Work
	Male #1 intestine	2 x 250 bp; Illumina	450 bp	31	18	Current Work
Parascaris soma	Male intestine (mixed)	2 x 250 bp; Illumina	550 bp	153	110	Current Work
	late embryos & larvae (population)	2 x 150 bp; Illumina	550 bp	292	138	Current Work
	Male intestine (mixed)	PacBio P6-C4	average 5.7 kb	3.74	85	Current Work
	Male intestine (mixed)	BioNano (BspQI)	average 211 kb	0.301	254	Current Work
* mixed = derived from 5-10 worms; population = 2-4 million individual
** previous work was derived from Wang et al 2012 Dev Cell
*** Fosmid reads that aligned concordantly to the genome with insertion size of 30-45 kb

## Sheet: Table S1b - BioNano maps
Table S1b. Stats on Optical Maps from BioNano
Optical Map Name	Sequence covered (Mb)	Largest scaffold (Mb)	Total scaffolds #	N50 (Mb)	N50 #	Aligned to genomes (Mb)	Aligned (%)
Ascaris germline BspQI	292.8	9.15	191	2.27	43	229.6	0.784153
Ascaris germline BbvCI	241.6	3.33	564	0.58	113	135.7	0.561672
Ascaris somatic BspQI	248.8	6.73	160	2.26	35	227.5	0.914389
Ascaris somatic BbvCI	268.9	11.2	108	4.52	22	213.2	0.79286
Parascaris somatic BspQI	219.7	7.48	126	2.87	26	189.8	0.863905
