# Supplementary material for: Comparative genome analysis of programmed DNA elimination in nematodes
Source: HighWire-hosted journal article supplement (doi:10.1101/gr.225730.117), 2017-11-08
Supplement: Supplemental_Table_S2.xlsx [file Supplemental_Table_S2.xlsx]

## Sheet: Ascaris germline
Table S2a. Ascaris germline genome assemblies
Features	AG v3 (old assembly)*	Illumina PE only	Illumina PE + Mate-Pair Scaffolding	Illumina PE + Mate-Pair/PacBio Scaffolding	Illumina + BioNano Scaffolding	PacBio only	Illumina PE + PacBio	PacBio + BioNano	Illumina PE + PacBio + BioNano	Final Assembly
Assembled bases (bp)	265545801	297938484	305323081	359606988	321534216	275367302	290094207	285854896	297568398	298028455
N50 (bp)	290558	17306	44377	103311	47875	763040	944408	3092398	3629520	4646302
N50 number	260	4487	1683	895	1504	106	90	30	25	21
N90 (bp)	48674	1313	1450	10058	1579	129855	89605	129855	87166	918089
N90 number	1100	26023	15120	5077	14047	416	427	184	216	75
Total scaffold number	31538	69990	59295	20447	59294	1007	2121	798	1934	415
Largest scaffold length (bp)	1465500	172574	488064	984771	6185216	3752989	4294379	7670800	12751736	13371140
* from Wang et al 2012 Dev. Cell

## Sheet: Ascaris soma
Table S2b. Ascaris somatic genome assemblies
Features	AS v3 (old assembly)*	Illumina only	Illumina + PacBio Scaffolding	Illumina + PacBio + Fosmid Scaffolding	PacBio only	Illumina + PacBio	PacBio + BioNano	Illumina + PacBio + BioNano	Final Assembly
Assembled bases (bp)	251265282	247917114	291046288	295363847	201159565	257822822	235580003	283555219	279712399
N50 (bp)	65087	2916	201854	407790	75080	450368	90980	1933928	4559892
N50 number	1011	20174	372	175	768	168	500	40	21
N90 (bp)	11448	737	28059	39922	27754	106105	29666	115377	1214186
N90 number	4399	89996	1739	927	2513	602	2336	292	67
Total scaffold number	37686	131186	8128	7167	3644	4349	3588	4071	217
Largest scaffold length (bp)	600478	81489	1895302	4934488	463760	2209701	7226165	6700806	13286914
* from Wang et al 2012 Dev. Cell

## Sheet: Parascaris germline
Table S2c. Parascaris germline genome assemblies
Features	Illumina only	Illumina + PacBio from soma	Final Assembly*
Assembled bases (bp)	257734617	273169583	253353821
N50 (bp)	34228	177316	1825986
N50 number	2035	375	44
N90 (bp)	4771	19978	204976
N90 number	9410	2088	173
Total scaffold number	27711	8298	1274
Largest scaffold length (bp)	242601	2729458	5603203
* using Parascaris somatic genome as reference

## Sheet: Parascaris soma
Table S2d. Parascaris somatic genome assemblies
Features	Illumina only	Illumina + PacBio Scaffolding	Illumina + BioNano Scaffolding	PacBio only	Illumina + PacBio	PacBio + BioNano	Illumina + PacBio + BioNano	Final Assembly
Assembled bases (bp)	215719791	299868023	304620976	239003798	236528541	248580550	240401857	242894555
N50 (bp)	8172	78693	45216	833720	1254098	2598075	2898342	1878535
N50 number	6420	1077	1285	90	63	32	26	41
N90 (bp)	1504	12998	3201	170619	291963	178731	578211	364956
N90 number	33114	4626	13375	314	203	124	86	142
Total scaffold number	50877	13125	30441	1025	2173	844	2057	490
Largest scaffold length (bp)	108959	514594	3191379	3733300	4048656	7205070	8081548	5603228
