# Supplementary material for: Comparative genome analysis of programmed DNA elimination in nematodes
Source: HighWire-hosted journal article supplement (doi:10.1101/gr.225730.117), 2017-11-08
Supplement: Supplemental_Table_S3.xlsx [file Supplemental_Table_S3.xlsx]

## Sheet: Satellite Repeats
Table S3a. Satellite or Simple Repeats in Nematodes with DNA Elimination
Organism	Repeat Sequence Name	Repeat Unit Length (bp)	Germline Base Pair (Mb)	% of the germline genome	Somatic Base Pair (Mb)	% of the Sequences Retained	Repeat Sequence and Major Variations
A. suum	Chromatin satellites (121 bp tandem repeats)	120*	29.7	0.0889222	1.63	0.59%**	AATTGATCATCGAATAAATCCCAATTGCAGAAATAATGCACAAAAAAGGCCCTTTATCGTAATACAAGTTCGGCTGAAATGCATCAAATTTGATAGCAAAACGATTAATTATTCCTTTAT
	Telomeric repeats	6	1.785	0.00534431	1.06	NA***	TTAGGC, TTAGGG, GTAGGC
	Pentanucleotide (5 bp tandem repeats)	5	1253.1	0.50124	6.73	0.00537068	TTGCA, TTGAA
P. univalens	Decanucleotide (10 bp tandem repeats)	10	941.9	0.37676	3.03	0.0032169	TTTGTGCGTG, TTTGTGCGTT, TTTGTGTGTG, TTTTTGTGCA
	GA rich tandem repeats	10	20.1	0.00804	1.02	0.0507463	GAGAGTGAGA, GAGAGAGAGA
	Telomeric repeats	6	0.56	0.000224	0.58	NA***	TTAGGC, TTAGGG, GTAGGC
	Chromatin satellites (49 bp tandem repeats)	49	28.8	0.0880734	0.2	0.00694444	TAATCGTATGATTGAACACACAACATAGCTGATCATGCGTAGTTGTATC
T. canis	32 bp repeats (interspersed)	32	1.2	0.00366972	0.03	0.025	TCTCGGCCCCTGTCGAAGCCACAGCGAGCGCA
	Telomeric repeats	6	0.5	0.00152905	0.006****	NA***	TTAGGC, TTAGGG, GTAGGC
* the major of the repeat unit is 120 bp (not 121 bp)
** after removal of 4.9% background for the somatic
*** new telomere sequences are added
**** not accurate due to the whole genome amplification

## Sheet: Interspersed Repeats
Table S3b. Interspersed Repeats in Ascaris and Parascaris genomes
		A. suum germline			A. suum soma			P. univalens germline			P. univalens soma
Repeat type	# of elements	Length (bp)	% of sequence	# of elements	Length (bp)	% of sequence	# of elements	Length (bp)	% of sequence	# of elements	Length (bp)	% of sequence
SINEs	1257	127467	0.0004	1863	230468	0.0008	448	30791	0.0001	242	45613	0.0002
LINEs	14968	6503898	0.0218	10933	4603730	0.0165	5634	2265940	0.0089	4098	1886128	0.0078
LTR elements	2464	1593733	0.0053	5370	1730212	0.0062	1995	1766673	0.007	1279	1068749	0.0044
DNA elements	2270	836275	0.0028	2956	877282	0.0031	987	290214	0.0011	665	162911	0.0007
Unclassified	48398	11497275	0.0386	45572	10422571	0.0373	14501	4159283	0.0164	13641	3673678	0.0151
Total	69357	20558648	0.0689	66694	17864263	0.0639	23565	8512901	0.0335	19925	6837079	0.0282
