# Supplementary material for: Comparative genome analysis of programmed DNA elimination in nematodes
Source: HighWire-hosted journal article supplement (doi:10.1101/gr.225730.117), 2017-11-08
Supplement: Supplemental_Table_S4.xlsx [file Supplemental_Table_S4.xlsx]

## Sheet: Ascaris_genes_and_expression
Chromosome	Start	End	Transcript_name	Strand	Tx_length	# of Exons	Annotation	Trans-splicing	5'-M7G	Eliminated	Best_expressed_transcript	Largest_transcript	male mitotic region	spermatogenesis	post-meiotic region	seminal vesicle	spermatids	female mitotic region	female early pachytene	female late pachytene	female diplotene	oocyte	zygote1	zygote2	zygote3	zygote4	24h	46h	64h	96h	5d	7d	L1	L2	carcass	muscle	intestine
AgB01	13603	14939	AgB01_g001_t01	.	1337	1	hypothetical protein			N	Y	Y	0.7	0.1	0.2	0.1	0.1	19.3	33.3	31.2	10.2	12	20.2	14.7	21.3	24.1	7.8	2.6	2.2	1	0.7	1.3	2.2	1.3	3.8	0.7	0.1
AgB01	15686	25796	AgB01_g002_t01	-	2066	9	methyltransferase-like protein 13			N	Y	Y	0.2	0.3	0	0	3.6	0.1	0.1	0	0	0	0.1	0.4	0.4	0.5	0.5	0.5	0.4	0	0.1	0.1	0.2	1.7	28.1	16.2	0
AgB01	15686	37885	AgB01_g002_t02	-	1717	9	methyltransferase-like protein 13			N	N	N	0.4	0.3	0	0.1	4.4	0.2	0	0.1	0.2	0.1	0.3	0.4	0.7	1.1	0.9	1.2	0.7	0.1	0.3	0.4	0.8	2	42	23	0
AgB01	32651	35372	AgB01_g003_t01	-	438	4	methyltransferase-like protein 13			N	Y	Y	0.1	0	0	0	0.5	0	0	0	0	0	0.1	0	0.2	0.2	0.2	0.5	0.5	0	0.1	0.1	1.2	0	10.6	3.6	0
AgB01	40564	48082	AgB01_g004_t01	-	980	9	REST corepressor			N	Y	N	9.7	0.6	1.4	0.4	0.9	14.7	8	8.4	1.6	0.7	2.3	2.4	1.3	5.6	6.4	7	4.6	7.8	10.1	8.7	5.5	1.8	0.6	0	0.4
AgB01	40564	48082	AgB01_g004_t02	-	986	9	rest corepressor			N	N	N	20.1	1.4	2.3	1.1	2.5	29.6	17.1	17	5.1	1.5	4.4	4.6	3.2	10.2	12.1	13.6	9	14.2	18.1	19.1	11.5	1.8	1.3	0.1	0.8
AgB01	41042	48082	AgB01_g004_t03	-	1058	8	rest corepressor			N	N	N	18.1	1.2	2.2	0.9	2.3	26.4	15.7	15.3	4.8	1.4	3.2	3.9	2.7	8.8	9.7	11.3	7.8	11.5	14.4	15.7	9.8	1.6	1	0.1	0.7
AgB01	42684	48082	AgB01_g004_t04	-	1451	5	rest corepressor			N	N	Y	8.7	0.8	0.9	0.4	1.5	12	7.5	6.8	1.7	0.5	1.5	1.7	1.1	3.4	4.4	4.7	4.2	5.3	7.4	8.3	5.5	1.2	0.3	0	0.5
AgB01	49194	52881	AgB01_g005_t01	-	599	5	methyltransferase-like protein 13			N	Y	Y	0	0	0	0	0	0.1	0.8	0.2	0.4	0.4	0.1	0	0	1.1	0.3	0.1	0	0	0	0	0.1	0	0.4	0	0
AgB01	59356	60933	AgB01_g006_t01	+	353	3	histidine acid phosphatase family protein			N	Y	Y	0	0	0	0	0	0	0	0	0	0.4	0	0.1	0	0.2	0	0.1	0	0	0	0.1	4.9	4.9	0.7	0.9	0
AgB01	90679	108717	AgB01_g007_t01	+	830	8	methyltransferase-like protein 13			N	N	N	0.4	0.4	0	0	4.2	0.2	0	0	0.3	0.2	0.6	0.5	1.3	1.5	1.6	2.3	1.5	0.2	0.7	0.4	1.5	2.1	39.4	19.7	0
AgB01	93192	109560	AgB01_g007_t02	+	338	4	methyltransferase-like protein 13			N	Y	N	0.2	0.1	0	0	2.2	0.2	0	0.1	0	0.1	0.5	0.3	0.9	1.2	1.5	1.1	1.3	0.4	0.1	0	0.6	0	26.4	13.4	0
AgB01	93199	112525	AgB01_g007_t03	+	1951	6	methyltransferase-like protein 13			N	N	Y	0.4	0.2	0.3	0.5	0.8	1.2	1.1	1.2	0.6	2.1	6.5	6.8	3.6	8.8	7.4	4.4	2.3	0.7	0.2	0.1	0.1	0	9.1	5.7	0.9
AgB01	103124	105061	AgB01_g007_t04	+	524	4	methyltransferase-like protein 13			N	N	N	0.4	0.2	0	0	0.5	0	0	0	0.6	0.1	0.3	0.6	0.9	0.5	0.7	0.7	0.2	0.1	0.3	0	0.4	0	12.8	5.7	0
AgB01	107834	112525	AgB01_g007_t05	+	1717	4	hypothetical protein			N	N	N	0.4	0.2	0.4	0.6	0.4	1.4	1.3	1.3	0.7	2.4	7.3	7.7	4	9.9	8.3	4.8	2.4	0.7	0.2	0.1	0.1	0	7.3	4.4	1.1
AgB01	110837	112468	AgB01_g008_t01	-	1430	2	hypothetical protein			N	N	N	1	0.5	0.5	1.3	0.7	3	2.5	2.3	1.5	2.1	7.8	6.9	4.4	12	8.5	5.6	2.1	1.1	0.1	0.1	0.2	0	13.4	7.6	1.6
AgB01	110837	112536	AgB01_g008_t02	-	1531	2	hypothetical protein			N	Y	N	0.9	0.4	0.5	1.3	0.7	2.9	2.4	2.3	1.5	2.8	9.1	9.5	4.5	13.1	10.1	6.2	2.4	1.2	0.2	0.1	0.2	0	12.3	7.1	1.5
AgB01	110837	112664	AgB01_g008_t03	-	1363	2	hypothetical protein			N	N	N	0.5	0.3	0.2	0.7	0.3	1.5	1.2	1.1	0.8	0.6	2.3	3.1	1.4	4.5	2.7	2	0.8	0.5	0.1	0.1	0.2	0	6.4	3.4	0.4
AgB01	110837	114259	AgB01_g008_t04	-	1683	3	hypothetical protein			N	N	Y	0.6	1.2	0.5	0.6	0.3	1.3	0.9	0.9	0.7	0.5	1.9	2.5	1.2	3.7	2.2	1.7	0.7	0.4	0.1	0	0.1	0	5.2	2.7	0.4
AgB01	113916	129717	AgB01_g009_t01	+	4166	13	aquaporin-10			N	N	N	6.8	43.6	18.5	88.7	41.2	0.4	0.6	0.2	21.9	14	0.4	0.7	1.1	0.6	1	1.4	1.5	0.9	0.8	0.7	2.4	2.1	9.6	0.7	2.4
AgB01	113916	136878	AgB01_g009_t02	+	7913	11	aquaporin-10			N	N	Y	1.8	11.3	5.5	44.5	20.2	0.2	0.3	0.2	11.4	7.6	0.8	0.8	0.7	1.2	2.9	1.9	0.8	2.7	2.2	2.1	2.2	1.1	4.8	0	0.1
AgB01	114073	120070	AgB01_g009_t03	+	2529	7	hypothetical protein			N	N	N	9.3	65	19.6	1	2.5	0.6	0.3	0.3	2	0.6	0.6	0.6	1.3	0.7	1.2	1.6	2	1.3	1.1	0.9	1.3	1.4	1.1	1	3.9
AgB01	119346	136878	AgB01_g009_t04	+	6105	8	aquaporin-10			N	N	N	2.5	5.4	4.9	58.6	26.5	0.4	0.7	0.4	15.7	10.9	1.8	1.4	1.4	2.6	6.6	4.5	2.3	6.5	5.8	5.4	4.9	2.5	7	0.2	1.5
AgB01	122269	129717	AgB01_g009_t05	+	1631	8	aquaporin-10			N	Y	N	3.1	14	17.1	228.6	101.8	0.2	1.1	0.1	55.6	38.1	0.1	0.4	0.7	0.3	0.1	0.1	0.2	0	0	0	4.1	3.2	24.9	0	0.1
AgB01	122269	136878	AgB01_g009_t06	+	5950	8	aquaporin-10			N	N	N	1.8	4.4	4.3	56	25.2	0.4	0.6	0.4	15.3	11.4	1.7	1.5	1.4	2.6	6.7	4.5	2.1	6.4	5.7	5.4	4.6	2.3	7.3	0.1	0.1
AgB01	122269	136878	AgB01_g009_t07	+	6024	8	aquaporin-10			N	N	N	1.9	4.6	4.6	0	26.7	0.4	0.7	0.4	16	11.7	1.7	1.5	1.3	2.6	6.6	4.4	2.1	6.4	5.7	5.3	4.6	2.3	7.5	0.1	0.1
AgB01	122269	136878	AgB01_g009_t08	+	5979	8	aquaporin-10			N	N	N	1.8	4.3	4.3	56.3	25.3	0.4	0.6	0.4	15.5	11.6	1.7	1.5	1.3	2.6	6.7	4.4	2.1	6.4	5.7	5.4	4.6	2.3	7.3	0.1	0.1
AgB01	123203	136878	AgB01_g009_t09	+	5786	7	Aquaporin-10			N	N	N	1.9	4.1	4.5	59.3	26.4	0.4	0.7	0.4	16.1	10.1	1.8	1.5	1.4	2.7	6.9	4.6	2.2	6.6	5.9	5.5	4.6	2.1	6.6	0.1	0.1
AgB01	123203	136878	AgB01_g009_t10	+	5757	7	Aquaporin-10			N	N	N	1.3	3.6	4.3	58.1	25.9	0.2	0.4	0.2	15	9	1.2	1.2	0.9	1.8	4.7	3	1.3	3.9	3.3	3	2.9	1.2	6	0.1	0.1
AgB01	127346	129717	AgB01_g009_t11	+	880	2	hypothetical protein			N	N	N	1.5	5.5	2.9	29.8	11.9	0	0.2	0	5.3	4.8	0	0	0.2	0	0	0	0	0	0	0	0.3	2	3.5	0	0.2
AgB01	129846	142000	AgB01_g010_t01	-	7559	7	hypothetical protein	SL		N	N	N	3	1.7	0.6	1.1	0.9	2.8	2.3	2.4	2.1	2	1.4	1.9	2.7	3.8	5	5.3	4.5	5.2	5.9	5.1	3.1	1.6	1.1	0.2	0.1
AgB01	129846	142517	AgB01_g010_t02	-	6772	9	hypothetical protein	SL		N	N	N	3.8	2.4	0.8	2.1	1.3	3.3	2.7	3	3	3	2.4	2.7	3.6	5.4	7.6	7.5	5.9	8.6	8.8	7.7	4.9	2.6	1.7	0.2	0.2
AgB01	129846	142517	AgB01_g010_t03	-	7589	9	hypothetical protein	SL		N	N	Y	3	1.7	0.6	1.1	0.8	2.8	2.3	2.5	2.1	2	1.5	1.9	2.9	4.1	5.7	5.6	4.9	5.4	6	5	3.2	1.6	1.1	0.2	0.1
AgB01	138061	141965	AgB01_g010_t04	-	1003	5	hypothetical protein	SL		N	Y	N	15.4	2.4	2.2	2	2.9	18.4	14.1	16.6	8.7	6.7	6.8	11.4	18.7	20.4	22.4	27.7	27.7	20.6	25.2	20.7	12.3	3.4	2.3	0.6	0.9
AgB01	144593	148869	AgB01_g011_t01	+	2659	6	p40		Telo	N	Y	Y	164.9	151.9	16.3	1.3	4.2	0.6	3	3.2	3.4	1.8	10.7	6.3	3	7.7	2.8	1.7	0.5	0.4	0.1	0.1	0.1	0	2.7	1.4	0.1
AgB01	144594	148869	AgB01_g011_t02	+	2628	6	p40		Telo	N	N	N	161.8	148.2	15.9	1.2	4.2	0.6	3	3.3	3.5	1.8	10.8	6.4	3	7.8	2.8	1.7	0.5	0.4	0.1	0.1	0.1	0	2.7	1.4	0.1
AgB01	196147	224942	AgB01_g012_t01	+	5903	9	Nuclear hormone receptor family member nhr-91	SL		N	Y	Y	2.4	1.2	1.4	0.1	7.4	0.2	0.3	0.2	0.3	0.1	0.2	0.2	0.2	0.2	0.7	1	0.7	1.5	4.9	14.7	41.1	1.5	0.4	0.3	0.2
AgB01	196147	224942	AgB01_g012_t02	+	5903	9	Nuclear hormone receptor family member nhr-91	SL		N	N	N	20.3	9.1	18.4	1.9	87.5	2.5	4.3	3.9	5.7	0.4	1.4	0.5	0.5	0.8	1.6	1.2	2.5	6	7.6	16.1	45.3	1.5	2.7	2.3	2.3
AgB01	196147	227841	AgB01_g012_t03	+	2211	10	Nuclear hormone receptor family member nhr-91	SL		N	N	N	0.1	1.1	0.2	0	0	0	0	0	0	0.1	0.3	0.1	0.2	0.5	1.5	2.1	1.5	2.1	5.5	17.9	56.3	3.1	0.2	0	0
AgB01	196219	211104	AgB01_g012_t04	+	869	5	Nuclear hormone receptor family member nhr-91			N	N	N	0.1	0.9	0.1	0	0	0	0	0	0	0	0	0	0.1	0	2	2.6	0.6	1.4	0	0.3	44.5	0	0.1	0	0
AgB01	197601	211104	AgB01_g012_t05	+	660	4	Nuclear hormone receptor family member nhr-91			N	N	N	0.1	1.1	0	0	0	0	0	0	0	0	0	0	0.2	0.1	2	2.5	0.7	1.3	0.1	0.2	43.9	0	0.1	0	0
AgB01	214791	220431	AgB01_g012_t06	+	659	4	Nuclear hormone receptor family member nhr-91	SL		N	N	N	0.1	1.4	0.2	0	0	0	0	0	0	0.2	0.4	0	0.6	1.1	1.1	1.7	1.4	2.9	10.3	34.2	64.1	0	0.3	0	0
AgB01	219892	220431	AgB01_g012_t07	+	540	1	Nuclear hormone receptor family member nhr-91			N	N	N	0	0.5	0	0	0	0	0	0	0	0	0.2	0	0.1	0.1	0.2	0.6	0	1.6	4.9	12.6	25.5	0	0.2	0	0
AgB01	225052	227841	AgB01_g012_t08	+	1823	2	Nuclear hormone receptor family member nhr-91			N	N	N	0.1	0.2	0	0	0	0	0	0	0	0	0	0	0	0	0.2	0.2	0.4	1.1	4.9	14.5	37.8	1.9	0.3	0	0
AgB01	226632	227841	AgB01_g012_t09	+	1210	1	Nuclear hormone receptor family member nhr-91			N	N	N	0	0.4	0	0	0	0	0	0	0	0	0	0	0	0	0.1	0.1	0.2	0.3	1.7	5.5	14.4	1.4	0.1	0	0
AgB01	220777	226519	AgB01_g013_t01	-	263	2	Nuclear hormone receptor family member nhr-91			N	Y	Y	0	0.6	0	0	0	0	0	0	0	0	0	0	0	0	0.8	0.4	0.4	1	5.5	18	49.1	0	0.4	0.1	0
AgB01	227945	229414	AgB01_g014_t01	.	1470	1	hypothetical protein			N	Y	Y	0	0.3	0	0	0.2	0	0	0	0	0	0	0	0	0	0.4	0.5	0.7	1	4	16.6	33.8	1.2	0.4	0	0
AgB01	231408	234773	AgB01_g015_t01	-	1459	3	hypothetical protein			N	Y	Y	0.1	1.1	0.1	0	0	0	0	0	0	0	0.2	0	0.1	0.2	0.1	0.2	0.4	0.1	0.1	0.1	0.7	5.9	0.1	0	0
AgB01	234940	246267	AgB01_g016_t01	+	4434	11	calponin-like protein ov9m			N	Y	Y	0.5	1.3	0.2	0	0	0	0	0	0	0	0.3	0.4	1	0.7	1.4	2	5.9	0.9	0.4	0.3	3.8	2.3	1.2	0.1	0
AgB01	235046	238520	AgB01_g016_t02	+	3475	1	hypothetical protein			N	N	N	1.2	3.2	0.3	0	0.1	0	0	0	0	0	0	0.1	0.1	0.2	0.2	0.2	1.1	0.1	0	0.1	0.3	0	0.1	0	0
AgB01	238591	241167	AgB01_g016_t03	+	2577	1	Uncharacterized protein C53C9.2			N	N	N	6	10.6	3.9	0.1	0.6	0.2	0	0.2	0.1	0.4	0.3	0.2	0.1	0.3	0.4	0.6	1.9	0.6	0.3	0.4	0.8	0	0.6	0.4	0.4
AgB01	235046	241167	AgB01_g017_t01	-	5236	2	Uncharacterized protein C53C9.2			N	N	Y	2	4.2	1	0	0.2	0	0	0	0	0.2	0	0.1	0.1	0.1	0.3	0.3	0.8	0.2	0.1	0.1	0.3	0	0.3	0.1	0.1
AgB01	238768	241167	AgB01_g017_t02	-	1488	2	Uncharacterized protein C53C9.2			N	Y	N	5.3	9.8	3.5	0.1	0.7	0.2	0.1	0.1	0	0.5	0.2	0.3	0.1	0.4	0.7	1	1.8	0.6	0.5	0.4	1	0	0.7	0.3	0.4
AgB01	249098	255475	AgB01_g018_t01	-	2610	7	Enoyl-CoA hydratase	SL		N	N	Y	0.3	0.2	1.8	0.4	1.8	9.6	6.7	7.4	3.1	3.8	16.8	16.1	14.3	41.6	34.1	57.3	43.8	93.9	59.5	45.5	20.5	4	62.3	91.6	1.1
AgB01	249098	255577	AgB01_g018_t02	-	1811	8	Enoyl-CoA hydratase	SL		N	Y	N	0.5	0.3	2.6	0.6	2.5	13.9	9.7	10.7	4.4	5.4	23.3	22.7	20.1	58.9	48.6	81.3	62.2	132.4	83.7	63.9	28.4	5.7	89.6	130.9	1.5
AgB01	260533	273970	AgB01_g019_t01	+	2661	15	Valyl-tRNA synthetase			N	Y	N	16.1	1.7	5.1	1	6.6	7.4	4.9	5.2	3.8	2.1	5.6	6.1	6.7	9.7	13.8	17.7	15.9	19.5	15.6	21.3	15.7	8.4	3.8	2.2	2
AgB01	260533	280252	AgB01_g019_t02	+	4359	22	Valyl-tRNA synthetase			N	N	N	11.8	1.4	3.8	0.8	4.7	5.7	3.9	4.4	3.5	1.8	5.7	4.9	5	9.2	13.2	16.8	13.6	19.6	15.8	20.8	16.6	7.5	3.7	2.2	1.8
AgB01	260533	280252	AgB01_g019_t03	+	4361	22	Valyl-tRNA synthetase			N	N	Y	11.8	1.4	3.8	0.8	4.7	5.7	3.9	4.4	3.5	1.8	5.7	4.9	5	9.2	13.1	16.7	13.3	19.4	15.7	20.7	16.6	7.5	3.7	2.2	1.8
AgB01	260533	280252	AgB01_g019_t04	+	4359	22	Valyl-tRNA synthetase			N	N	N	11.8	1.4	3.8	0.8	4.7	5.7	3.9	4.4	3.5	1.8	5.7	4.9	5	9.3	13.2	16.9	13.6	19.6	15.8	20.8	16.6	7.5	3.7	2.2	1.8
AgB01	260533	280252	AgB01_g019_t05	+	4356	22	Valyl-tRNA synthetase			N	N	N	11.8	1.4	3.8	0.8	4.7	5.7	3.9	4.4	3.5	1.7	5.6	4.9	5	9.1	12.9	16.6	13.5	19.5	15.6	20.5	16.5	7.1	3.7	2.2	1.8
AgB01	260533	290202	AgB01_g019_t06	+	2828	18	Valyl-tRNA synthetase	SL		N	N	N	16.6	2	5.4	1.1	6.6	8.2	5.3	6	4.5	2.3	5.9	6.5	6.9	11	15.5	20.2	18	21.8	17.6	23.9	17.6	7.9	4.2	2.6	2.1
AgB01	260536	290874	AgB01_g019_t07	+	3095	19	Valyl-tRNA synthetase	SL		N	N	N	15.3	1.8	5	0	6.1	7.5	5	5.7	4.3	2.1	5.7	6	6.4	10.4	14.3	19	17	20.5	16.6	22.7	16.7	6.7	3.9	2.4	2
AgB01	261084	280252	AgB01_g019_t08	+	3960	20	Valyl-tRNA synthetase			N	N	N	11.6	1.5	3.7	0.8	4.6	5.5	3.9	4.3	3.5	1.4	4.7	3.3	2.6	8.7	11.8	15.5	10.7	18.7	15.1	18.7	16.1	7.4	3.5	2.1	1.8
AgB01	261084	290874	AgB01_g019_t09	+	2702	17	Valyl-tRNA synthetase	SL		N	N	N	15.5	2	5	1	6.2	7.4	5.1	5.7	4.3	1.7	4.4	3.9	3.1	10	12.8	17.8	13.2	19.6	15.9	20.4	16.1	7	3.7	2.3	2
AgB01	261090	290874	AgB01_g019_t10	+	2696	17	Valyl-tRNA synthetase	SL		N	N	N	15.5	2	5	1	6.2	7.4	5.1	5.7	4.3	1.7	4.4	3.9	3.2	10	12.8	17.8	13.3	19.6	15.9	20.4	16.1	7.1	3.7	2.3	2
AgB01	261090	290874	AgB01_g019_t11	+	2696	17	Valyl-tRNA synthetase	SL		N	N	N	15.5	2	5	1	6.2	7.4	5.1	5.7	4.3	1.7	4.4	3.9	3.2	10	12.8	17.8	13.3	19.6	15.9	20.4	16.1	7.1	3.7	2.3	2
AgB01	280657	289497	AgB01_g020_t01	+	1682	10	Cap-specific mRNA (nucleoside-2'-O-)-methyltransferase 2	SL		N	N	Y	4.7	0.3	2	0.1	1.4	3.5	2.4	3.7	4	1.5	2.3	2.3	3.2	7.3	6.2	7.7	4.6	6.9	7.1	4.4	4.5	2.1	1.2	0.2	0.4
AgB01	281194	289497	AgB01_g020_t02	+	1096	9	Cap-specific mRNA (nucleoside-2'-O-)-methyltransferase 2			N	Y	N	4.8	0.3	1.9	0	1.3	3.4	2.6	3.7	3.4	1.5	2.2	1.4	2.2	6.5	5.3	8.4	3.4	6.8	7	4.5	4.4	0	1.2	0.2	0.5
AgB01	291510	296041	AgB01_g021_t01	+	2785	3	Cap-specific mRNA (Nucleoside-2'-O-)-methyltransferase 2			N	Y	Y	1.1	0.2	0.4	0	0	0.5	0.4	0.5	0.8	1	2.4	1.2	0.6	2.5	3.7	3	2.1	3.7	3.5	2.5	2.8	0.6	0.7	0.2	0.2
AgB01	305384	308886	AgB01_g022_t01	+	2230	3	hypothetical protein	SL		N	Y	Y	0.1	0.2	0	0	0	0	0	0	0	0	0.2	0.2	0.2	0.3	2.9	2.3	14.7	0.2	0	0.1	5.7	0	0.5	0.5	0
AgB01	319633	381691	AgB01_g023_t01	+	6329	19	G-protein coupled receptor	SL	Telo	N	N	Y	2.6	3.9	0.6	0.1	0.2	10.7	15.6	16.1	5.4	2.3	6.4	4.7	4.6	9.9	2.4	2.1	0.6	0.1	0.1	0.6	22.3	3	0.8	4.5	0.5
AgB01	319633	390130	AgB01_g023_t02	+	4497	26	Protein phosphatase 1L	SL	Telo	N	Y	N	0.8	1.5	0.4	0.1	0.2	19.7	24.5	25.2	7	3	8.4	6.8	6.4	14	3.5	3.2	0.9	0.3	0.1	0.9	31.5	3.5	1	5.9	0.6
AgB01	319633	390130	AgB01_g023_t03	+	4407	26	G-protein coupled receptor	SL	Telo	N	N	N	0.8	1.5	0.4	0.1	0.3	19.5	24.4	25	7	3.1	8.4	6.9	6.4	13.8	3.4	3.2	1	0.3	0.1	0.8	30.9	3.1	1	5.7	0.6
AgB01	345601	381691	AgB01_g023_t04	+	5320	13	G-protein coupled receptor		Telo	N	N	N	3	4.7	0.6	0	0.1	6.2	12	11.7	4	1.9	5.6	4.1	3.5	7.5	1.9	1.9	0.6	0.1	0.1	0.5	20.1	2.9	0.8	3.9	0.6
AgB01	345601	381691	AgB01_g023_t05	+	5324	13	G-protein coupled receptor		Telo	N	N	N	3	4.7	0.6	0	0.1	6.2	12	11.7	4	1.9	5.6	4.1	3.4	7.4	1.9	1.9	0.5	0.1	0.1	0.5	19.8	2.9	0.8	3.9	0.6
AgB01	376200	390130	AgB01_g023_t06	+	1951	10	papilin	SL	Telo	N	N	N	1.6	3.4	0.3	0	0.2	12.6	10.3	10.4	1.1	0.9	2.2	2.3	3.1	3.1	1.5	1.5	1.3	0.4	0.1	0.4	9.3	0.9	0.4	1.3	0.2
AgB01	376428	381691	AgB01_g023_t07	+	3555	3	G-protein coupled receptor		Telo	N	N	N	4.5	6.9	0.7	0	0.2	1	2.4	2.5	1.4	0.7	1.9	1	1.8	1.7	0.6	0.5	0.5	0	0	0.1	4.8	1.5	0.4	1.4	0.2
AgB01	382783	390130	AgB01_g023_t08	+	1368	7	papilin	SL		N	N	N	0.1	0.9	0	0	0.1	14.7	9.8	10.2	0.1	0.2	0.5	1.9	2.4	2	1.7	1.7	1.3	0.6	0.2	0.4	6.6	0	0.1	0.1	0
AgB01	390733	395195	AgB01_g024_t01	+	810	5	papilin			N	Y	Y	0.3	0.6	0.1	0	0.2	12.9	10.1	11.7	0.1	0.2	0.4	0.3	0.5	0.7	0.6	0.2	0	0.1	0.1	0.4	4.7	0	0.1	0.1	0
AgB01	395956	402523	AgB01_g025_t01	-	1739	8	sentrin-specific protease 7			N	N	N	12	6.4	1.8	0.5	0.7	13.2	11.4	11.6	1.7	0.8	2.7	3.1	2.7	6.1	6.7	9.7	7.8	6.8	5	5.8	3.5	2	1	0.4	0.6
AgB01	395956	406694	AgB01_g025_t02	-	2613	13	sentrin-specific protease 7			N	Y	N	39.7	18.9	5.8	1.1	3.9	33.8	38.5	35.3	4	1.7	6.5	8	13.1	12.2	15.8	20.9	23.2	13.5	11	11.9	6.5	3.3	1.6	0.7	1.1
AgB01	395956	406694	AgB01_g025_t03	-	2619	13	sentrin-specific protease 7			N	N	Y	25.6	12.2	3.3	0.8	2.3	23.4	24.8	23.7	2.6	1	4.1	5	6.6	8.3	10.8	14.1	14.8	9	7.2	8.2	4.5	2.6	1.2	0.6	0.7
AgB01	416503	437267	AgB01_g026_t01	+	2477	12	sco-spondin			N	N	N	0	0	4.7	10.2	5.3	0	0.1	0	2.9	0.9	0.1	0	0	0	0	0	0	0	0.1	0.6	29.2	2.8	0	0	0
AgB01	416503	451426	AgB01_g026_t02	+	6131	27	sco-spondin			N	N	N	0.1	0.1	3.3	6.3	3.2	0.1	0.1	0	2	0.9	0.1	0.1	0.1	0.4	1.9	3.6	2.3	1.8	0.5	0.9	29.3	2.5	0.1	0	0
AgB01	416503	451426	AgB01_g026_t03	+	6278	28	Hemicentin-1, partial			N	N	Y	0.1	0.1	3.2	6.2	3.1	0.1	0.1	0.1	2	0.9	0.1	0.1	0	0.3	1.9	3.4	2.2	1.7	0.5	0.8	28.6	2.8	0.2	0	0
AgB01	416610	443042	AgB01_g026_t04	+	3559	20	sco-spondin			N	N	N	0.1	0.1	5.1	9.3	4.9	0	0.1	0	2.8	1.1	0.2	0	0.1	0.3	1.6	3.3	2.7	1.1	0.5	1	35.8	2.4	0.1	0	0
AgB01	431975	442342	AgB01_g026_t05	+	1298	7	Hemicentin-1, partial			N	Y	N	0.1	0.2	3.8	4.2	2.6	0	0.1	0.1	1.7	1	0.2	0	0.1	0.6	2.8	4.8	5.5	1.6	0.6	1	35.6	2.7	0.1	0	0
AgB01	441699	451426	AgB01_g026_t06	+	2514	8	sco-spondin			N	N	N	0	0.1	0.9	0	1	0.2	0.1	0	1	0.5	0	0.2	0	0.5	2.7	4.6	2	3.2	0.6	0.7	22.3	2.8	0.3	0	0
AgB01	441699	451426	AgB01_g026_t07	+	2661	9	Hemicentin-1, partial			N	N	N	0.1	0.1	1.1	2.4	1.1	0.2	0.1	0.1	1.2	0.6	0	0.3	0	0.5	2.9	5.2	2.5	3.3	0.7	0.8	24.3	3.2	0.3	0	0
AgB01	441699	451426	AgB01_g026_t08	+	2408	7	Hemicentin-1, partial			N	N	N	0.1	0.1	1.1	2.4	1.1	0.2	0.1	0.1	1.3	0.6	0	0.3	0	0.4	2.9	5.1	2.7	3.6	0.8	0.8	23.1	3.6	0.3	0	0
AgB01	441723	448661	AgB01_g026_t09	+	935	7	Hemicentin-1, partial			N	N	N	0.2	0.2	2.5	5.7	2.6	0.6	0.2	0.2	3.1	1.2	0	0.6	0	1	5.1	10.7	5.6	5.5	1.3	1.1	39.1	9.2	0.4	0.1	0
AgB01	447460	448337	AgB01_g026_t10	+	878	1	sco-spondin			N	N	N	0	0.1	0.1	0.4	0.2	0	0	0	0	0.1	0	0	0	0.3	0.7	1.6	1	0.6	0.2	0.2	5.8	0	0	0	0
AgB01	454493	466494	AgB01_g027_t01	-	4918	9	1-acyl-sn-glycerol-3-phosphate acyltransferase acl-12			N	N	Y	0.7	1.2	3.3	0.1	0.3	0.3	0.2	0.2	0.9	0.3	0.6	0.2	0.5	0.8	5.9	5.5	2.5	5.9	6.8	5.5	4.2	5.6	5.2	2.8	2.2
AgB01	454493	466494	AgB01_g027_t02	-	4918	9	1-acyl-sn-glycerol-3-phosphate acyltransferase acl-12			N	N	N	2.1	1.9	3.5	0.2	0.3	0.3	0.3	0.3	0.9	0.5	0.8	0.5	0.7	1	6.2	5.8	4	6.2	7.2	6	4.6	6	5.3	2.9	2.4
AgB01	454493	466494	AgB01_g027_t03	-	4918	9	1-acyl-sn-glycerol-3-phosphate acyltransferase acl-12			N	N	N	0.5	1	3.3	0.1	0.3	0.3	0.2	0.3	0.8	0.3	0.6	0.2	0.5	0.8	5.9	5.5	2.5	5.9	6.8	5.5	4.2	5.6	5.2	2.9	2.2
AgB01	454493	466494	AgB01_g027_t04	-	4918	9	1-acyl-sn-glycerol-3-phosphate acyltransferase acl-12			N	Y	N	0.9	1.3	3.4	0.1	0.3	0.3	0.2	0.2	0.9	0.5	0.7	0.3	0.5	0.9	6	5.7	3.4	6	7	5.7	4.4	5.6	5.2	2.9	2.3
AgB01	478592	497525	AgB01_g028_t01	-	3306	15	Cell death abnormality protein 1			N	N	Y	0.1	0.4	22.3	0.5	0.6	2.8	3.8	4	3.1	2.2	6.6	5.8	5.9	12.4	14.5	28.9	23.9	7.4	1.7	3.7	26.2	1	3.1	0.3	0
AgB01	478592	497525	AgB01_g028_t02	-	3306	15	Cell death abnormality protein 1			N	N	N	0.4	0.5	22.4	0.5	0.7	2.8	3.8	4.1	3.1	2.2	6.6	5.8	5.9	12.4	14.5	28.9	23.9	7.4	1.7	3.7	26.3	1	3.1	0.3	0
AgB01	478592	497525	AgB01_g028_t03	-	3306	15	Cell death abnormality protein 1			N	N	N	0.3	0.5	22.4	0.5	0.6	2.8	3.8	4.1	3.1	2.2	6.6	5.8	5.9	12.4	14.5	28.9	23.9	7.4	1.7	3.7	26.3	1	3.1	0.3	0
AgB01	478592	497525	AgB01_g028_t04	-	3306	15	Cell death abnormality protein 1			N	N	N	0.2	0.5	22.3	0	0.6	2.8	3.8	4.1	3.1	2.2	6.6	5.8	5.9	12.4	14.5	28.9	23.9	7.4	1.7	3.7	26.3	1	3.1	0.3	0
AgB01	478592	497525	AgB01_g028_t05	-	3252	15	Cell death abnormality protein 1			N	N	N	0.2	0.5	21.3	0.5	0.6	2.7	3.5	3.9	3.1	2.2	6.4	5.7	5.8	12.2	14.3	28.2	23.3	7.1	1.6	3.6	24.7	1.1	3	0.3	0
AgB01	478592	497525	AgB01_g028_t06	-	3252	15	Cell death abnormality protein 1			N	N	N	0.2	0.4	21.3	0.5	0.6	2.7	3.5	3.9	3.1	2.2	6.4	5.7	5.8	12.2	14.3	28.2	23.3	7.1	1.6	3.6	24.7	1.1	3	0.3	0
AgB01	478592	497525	AgB01_g028_t07	-	3252	15	Cell death abnormality protein 1			N	N	N	0.2	0.4	21.3	0.5	0.6	2.7	3.5	3.9	3.1	2.2	6.4	5.7	5.8	12.2	14.3	28.2	23.3	7.1	1.6	3.6	24.8	1.1	3	0.3	0
AgB01	478592	497525	AgB01_g028_t08	-	3306	15	Cell death abnormality protein 1			N	N	N	0.2	0.4	22.3	0.5	0.6	2.8	3.8	4.1	3.1	2.2	6.6	5.8	5.9	12.4	14.5	28.9	23.9	7.4	1.7	3.7	26.2	1	3.1	0.3	0
AgB01	478592	497525	AgB01_g028_t09	-	3279	15	Cell death abnormality protein 1			N	Y	N	0.1	0.4	21.9	0.5	0.6	2.8	3.6	3.9	3.1	2.2	6.5	5.7	5.8	12.3	14.5	28.6	23.9	7.3	1.7	3.7	25.8	1.1	3.1	0.3	0
AgB01	501301	507847	AgB01_g029_t01	-	677	6	Cell death abnormality protein 1	SL		N	Y	Y	0	0.8	21.2	0	1.1	3.9	2.6	3.1	4.4	3	5.5	1.6	4.2	7.4	13.2	17.4	1.9	3.8	1.3	2.5	26.1	0	1.8	0.2	0
AgB01	501301	509074	AgB01_g029_t02	-	567	6	Cell death abnormality protein 1	SL		N	N	N	0	0.9	24.1	0	0.9	4.4	2.8	3.6	5.3	3.3	6.2	1.9	4.5	8	13.9	19.2	1.7	4	1.3	2.6	27.7	0	1.9	0.2	0
AgB01	515921	524200	AgB01_g030_t01	-	3415	8	hypothetical protein	SL		N	N	N	0.2	0.3	0.1	0.1	0.1	5	30.9	32.5	15.7	18.5	35.6	27.6	23.6	36.6	12.3	5.8	1.8	0.6	0.2	0.3	0.3	0	1.2	0.1	0
AgB01	515921	524306	AgB01_g030_t02	-	3443	9	hypothetical protein	SL		N	Y	Y	0.2	0.3	0.1	0.1	0.1	5.4	33.4	35.2	16.7	18.8	35.4	27.9	24.3	37.7	12.5	6	1.8	0.6	0.2	0.3	0.3	0	1.2	0.1	0
AgB01	526673	532665	AgB01_g031_t01	-	2041	7	spry domain-containing protein 7	SL		N	Y	N	30.8	6.7	7.5	4.4	4.5	21.2	17.6	17.1	4.5	6.6	26.7	19.7	22.7	36.4	32.5	27.8	24.5	15.3	13.2	11.4	12.2	5.9	14.2	5.6	4.9
AgB01	526673	533226	AgB01_g031_t02	-	4089	4	spry domain-containing protein 7	SL		N	N	Y	15.2	5.2	3.6	2	2	9.4	7.9	7.6	2.2	3.5	14.6	10.8	11.5	19	17.6	14.9	11.8	8.1	7.1	6.2	7.1	3	7	2.8	2.5
AgB01	528391	533226	AgB01_g031_t03	-	3020	4	spry domain-containing protein 7	SL		N	N	N	22	6.5	5.4	3.1	3.3	14.6	12	11.7	2.8	4.2	16	13.2	16.1	23.2	20.1	17.8	17	8.3	7.5	7.1	7.3	3.4	7.8	3	2.8
AgB01	533575	555909	AgB01_g032_t01	+	3068	13	hypothetical protein	SL	Telo	N	N	N	5.3	1.9	1.9	0	0.8	3.8	3.3	2.8	1.7	1.5	4.1	3.8	3.7	9.5	13.1	10.5	9.5	23.3	27	14.6	8.7	1.1	1	0.6	0.2
AgB01	538902	555909	AgB01_g032_t02	+	3956	14	hypothetical protein	SL		N	Y	N	4.5	1.6	1.4	0.5	1	4.3	3.4	2.8	1.7	1.4	3.8	3.5	3.8	9.3	12.4	9.8	9.5	20.7	24.6	13.6	7.8	2.2	0.8	0.5	0.3
AgB01	538902	555909	AgB01_g032_t03	+	4196	17	hypothetical protein	SL		N	N	N	4.9	1.6	1.5	0.5	0.9	4.2	3.4	2.8	1.9	1.4	3.8	3.4	3.6	9.4	12.5	9.7	9.2	21	24.7	13.4	7.9	2.1	0.8	0.5	0.2
AgB01	539049	555909	AgB01_g032_t04	+	3556	18	hypothetical protein	SL		N	N	N	5.8	1.9	1.8	0.6	1.1	4.9	4	3.3	2.2	1.6	4.4	3.9	4	11	14.5	11.4	10.8	24.6	29	15.7	9.2	2.4	1	0.6	0.3
AgB01	539055	555909	AgB01_g032_t05	+	3310	15	hypothetical protein	SL		N	N	N	5.4	2	1.7	0.5	1.2	5.1	4.1	3.3	2.1	1.6	4.4	4.1	4.3	11	14.6	11.6	11.3	24.6	29.2	16.1	9.1	2.6	1	0.6	0.3
AgB01	539068	555909	AgB01_g032_t06	+	6375	13	hypothetical protein	SL		N	N	Y	3.2	1.1	1.1	0.3	0.6	2.7	2.3	1.8	1.2	0.9	2.5	2.3	2.4	6.1	8.8	6.8	6.8	14.4	17	9.4	5.3	1.4	0.5	0.3	0.2
AgB01	550548	555909	AgB01_g032_t07	+	5362	1	hypothetical protein			N	N	N	1.1	0.4	0.4	0	0.1	0.4	0.3	0.3	0.2	0.4	1.1	0.5	0.7	2	4	2.6	2.4	7.3	8.9	4.5	2.9	0	0.4	0.2	0.1
AgB01	534277	537878	AgB01_g033_t01	-	982	3	hypothetical protein		Telo	N	N	N	857.3	3273.3	919.4	8.6	150.8	1.7	1.1	0.8	1.6	15.4	2.3	1.7	5.2	1.1	0.9	1.4	1.3	0.1	0.3	0.3	7.5	0	42.3	1.4	46.4
AgB01	534277	538330	AgB01_g033_t02	-	3253	2	hypothetical protein		Telo	N	Y	Y	532.5	1848.2	337.3	4.4	65.3	0.7	0.6	0.5	0.8	3.9	0.9	0.6	2.3	0.8	0.5	0.5	0.7	0.1	0.1	0.2	2.3	0	12	0.4	14
AgB01	536469	538414	AgB01_g034_t01	+	1772	2	hypothetical protein		Telo	N	Y	Y	320.8	1194.3	719	6.7	102.1	0.7	0.7	0.5	1.7	4.4	2.8	2.4	2.6	2.8	1.2	0.4	0.6	0	0	0.1	3.8	0	9.8	0.3	14.8
AgB01	559437	572145	AgB01_g035_t01	+	3916	12	oxysterol-binding protein 1	SL	Telo	N	N	Y	41.7	113.1	13.4	0.4	1.2	0.2	0.2	0	1	0.6	2.5	1.5	0.9	3.5	3.9	2.7	2.2	1.5	0.7	0.6	0.9	1.3	0.6	0.2	0.1
AgB01	559450	572145	AgB01_g035_t02	+	2937	13	oxysterol-binding protein 1	SL	Telo	N	Y	N	60.8	161.7	19.4	0.6	1.9	0.3	0.3	0	1.3	0.8	3.4	1.9	1.3	4.6	5.2	3.8	3.1	2.2	1.2	1	1.5	0.6	0.8	0.3	0.2
AgB01	559479	572145	AgB01_g035_t03	+	3649	10	oxysterol-binding protein 1	SL	Telo	N	N	N	44.3	119.2	15.2	0.5	1.4	0.2	0.3	0	1	0.6	2.6	1.4	1	3.5	4.9	3.7	2.5	2.2	1.2	1.1	1.4	2.4	0.9	0.3	0.2
AgB01	559479	572145	AgB01_g035_t04	+	3768	11	oxysterol-binding protein 1	SL	Telo	N	N	N	47.5	128.9	16.1	0.5	1.5	0.2	0.2	0.1	1	0.6	2.8	1.6	1.1	3.7	5.1	3.7	2.8	2.2	1.2	1.1	1.4	2.3	0.9	0.3	0.2
AgB01	563205	572145	AgB01_g035_t05	+	3245	6	oxysterol-binding protein 1		Telo	N	N	N	23.2	64.9	8.4	0.3	0.8	0.1	0.1	0	0.3	0.1	0.4	0.6	0.5	0.7	2	1.7	1.5	1.4	0.7	0.7	0.8	1.6	0.5	0.1	0.2
AgB01	567598	579489	AgB01_g036_t01	-	5745	12	Oxysterol-binding protein 1, partial		Telo	N	N	N	14.9	50.3	13.8	0.6	0.9	0.2	0.3	0.2	0.3	0.6	0.5	0.6	0.8	0.9	3.3	4.3	5.1	2.5	2	1.7	1.5	1.2	0.6	0.2	0.3
AgB01	567598	580779	AgB01_g036_t02	-	6252	13	Oxysterol-binding protein 1, partial		Telo	N	N	Y	15.3	52.3	14.6	0.5	1	0.3	0.3	0.2	0.3	0.6	0.5	0.7	0.8	0.9	3.3	4.3	5.3	2.7	2	1.8	1.5	1.1	0.6	0.2	0.3
AgB01	574989	575841	AgB01_g036_t03	-	678	2	Oxysterol-binding protein 1, partial			N	Y	N	19.3	67.3	24.7	0.6	1.7	0.3	0.4	0.8	0.5	0.6	0.4	0.3	1.5	1.5	4	5.5	10.4	3.3	1.9	1.5	1.5	0	0.5	0.3	0.5
AgB01	588616	626522	AgB01_g037_t01	-	6162	44	Dedicator of cytokinesis protein 11			N	Y	Y	13	7.8	62.4	7	9.3	10.1	7	7.4	5	0.6	3.6	5.4	7.1	12.7	17.1	18.7	14.2	14.5	15.1	12.9	11	6.7	0.8	0.6	0.3
AgB01	616688	617175	AgB01_g038_t01	.	488	1	Dedicator of cytokinesis protein 11			N	Y	Y	2.6	2.3	19.5	1.6	2.3	1.6	2	1.6	0.2	0	0.8	0.1	0	0.1	1.9	1.9	0.8	3.3	3.1	2.2	1.8	0	0	0	0.1
AgB01	648394	654892	AgB01_g039_t01	+	991	7	Phosphatidylinositol transfer protein beta isoform			N	N	N	26.5	61.4	8	0	1.2	0	0	0	0	0	0	0	0.4	0.3	0.2	0.2	0	0	0	0	0.1	0	0.2	0	0
AgB01	648394	654892	AgB01_g039_t02	+	950	7	Phosphatidylinositol transfer protein beta isoform			N	Y	N	27.7	64.9	8.5	0	1.2	0	0	0	0	0	0.1	0	0.4	0.3	0.2	0.2	0	0	0	0	0.1	0	0.2	0	0
AgB01	648394	654892	AgB01_g039_t03	+	1164	8	Phosphatidylinositol transfer protein beta isoform			N	N	N	24.3	57.6	7.5	0	1	0	0.1	0	0	0	0.1	0	0.4	0.2	0.2	0.1	0	0	0	0	0.1	0	0.1	0	0
AgB01	648396	654892	AgB01_g039_t04	+	1126	8	Phosphatidylinositol transfer protein beta isoform			N	N	N	25.3	60	7.9	0	1	0	0.1	0	0	0	0.1	0	0.4	0.2	0.2	0.1	0	0	0	0	0.1	0	0.1	0	0
AgB01	648412	654892	AgB01_g039_t05	+	1127	8	Phosphatidylinositol transfer protein alpha isoform			N	N	N	25.4	60.7	8	0	1.1	0	0.1	0	0	0	0.1	0	0.4	0.3	0.2	0.1	0	0	0	0	0.1	0	0.1	0	0
AgB01	649203	654892	AgB01_g039_t06	+	1285	5	phosphatidylinositol transfer protein alpha isoform			N	N	N	21	48.8	6.3	0	0.9	0	0	0	0	0	0	0	0.3	0.2	0.2	0.1	0	0	0	0	0.1	0	0.1	0	0
AgB01	649203	654892	AgB01_g039_t07	+	1439	6	phosphatidylinositol transfer protein alpha isoform			N	N	Y	20.4	48.9	6.4	0	0.8	0	0.1	0	0	0	0.1	0	0.3	0.2	0.1	0.1	0	0	0	0	0.1	0	0.1	0	0
AgB01	649972	654892	AgB01_g039_t08	+	978	6	Phosphatidylinositol transfer protein beta isoform			N	N	N	26.1	62.8	7.8	0	1.2	0	0.1	0	0	0	0	0	0.4	0.2	0.2	0.2	0	0	0	0	0.1	0	0.1	0	0
AgB01	653077	654892	AgB01_g039_t09	+	649	3	phosphatidylinositol transfer protein alpha isoform			N	N	N	26.8	62.4	8.7	0	0.4	0	0	0	0	0	0	0	0.7	0.2	0.2	0.2	0	0	0.1	0.1	0.1	0	0.1	0	0
AgB01	655970	663298	AgB01_g040_t01	+	2511	3	hypothetical protein			N	Y	Y	1.1	0.6	0.1	0	0	0	0.1	0	0	0	0	0	0	0	0	0	0	0	0	0	0	0	0	0	0
AgB01	668039	671505	AgB01_g041_t01	-	955	4	tau-tubulin kinase 1			N	N	N	20.2	35.5	3.5	0	0.9	0	0	0	0	0.2	0.2	0.4	0.3	0.5	0.5	0.3	0.1	0.2	0	0	0	0	0.1	0	0
AgB01	668039	680899	AgB01_g041_t02	-	2113	12	tau-tubulin kinase 1	SL		N	N	N	28	44	15.4	0.1	1.4	2	3.6	3.8	4.1	3.2	10.8	7.6	4.8	15.8	10.4	8.2	2.5	1	0.2	0.2	0.2	0	1.5	1.4	0
AgB01	668039	681213	AgB01_g041_t03	-	2970	12	Tau-tubulin kinase 2	SL		N	Y	Y	22.6	34.5	13.2	0.2	1.1	1.6	3	3	4.3	2.6	8.3	5.9	3.7	12.7	8.1	6.4	2	0.7	0.2	0.1	0.2	0	1.2	1.2	0
AgB01	681620	682608	AgB01_g042_t01	-	811	2	hypothetical protein		Telo	N	Y	Y	6449.9	28079.5	23783	201.1	2042.6	15	15.8	4.6	19.9	51	4.8	7.3	27.8	3.9	3.4	4.6	10.2	2.9	1.3	2.8	52.4	0	179.1	5.9	180.6
AgB01	683381	686279	AgB01_g043_t01	-	2112	2	hypothetical protein			N	Y	Y	172.2	848.9	632.7	5.4	61.1	0.4	0.5	0.3	0.8	2.4	0.3	0.3	0.6	0.3	0.7	0.6	0.9	0.4	0.4	0.2	1	0	10.1	0.3	9.7
AgB01	684434	686274	AgB01_g044_t01	.	1841	1	hypothetical protein			N	Y	Y	145.8	678.7	556.3	4.9	53.6	0.3	0.3	0.2	0.5	3.9	0.8	1.9	1	0.9	2.1	2	3.8	0.8	0.4	0.3	3.7	0	7.7	0.3	7.3
AgB01	688829	700900	AgB01_g045_t01	-	3427	10	putative transporter			N	N	N	9.5	36	11.4	6.8	7.8	0.2	0.3	0.2	0.2	0.1	1.4	2.1	1.5	1.9	1.4	0.9	1.1	0.7	0.9	0.7	1	0.5	1	0.8	2.5
AgB01	688829	700900	AgB01_g045_t02	-	3427	10	putative transporter			N	N	N	9.8	36.4	11.5	6.8	7.9	0.2	0.3	0.2	0.2	0.1	1.5	2.2	1.7	1.9	1.4	0.9	1.2	0.7	1	0.7	1.1	1	1.1	0.8	2
AgB01	688829	700900	AgB01_g045_t03	-	4369	9	putative transporter			N	N	N	7.2	28.3	8.9	0	6.1	0.1	0.2	0.2	0.2	0.1	1.1	1.6	1.1	1.4	1	0.7	0.7	0.4	0.5	0.4	0.6	0.4	0.6	0.5	1.9
AgB01	688829	701534	AgB01_g045_t04	-	3970	13	Transporter, partial	SL		N	N	N	9.9	41.2	13	8.5	9	0.1	0.2	0.2	0.2	0.1	1.3	1.9	1.3	1.6	1.2	0.7	0.9	0.4	0.5	0.3	0.6	0.4	0.6	0.3	1.3
AgB01	688829	701534	AgB01_g045_t05	-	3970	13	Transporter, partial	SL		N	N	N	9.9	41.2	13	8.5	9	0.1	0.2	0.2	0.2	0.1	1.3	1.9	1.3	1.6	1.2	0.7	0.9	0.4	0.5	0.3	0.6	0.4	0.6	0.3	1.3
AgB01	688829	704334	AgB01_g045_t06	-	5062	13	Transporter, partial	SL		N	N	N	8.4	33.1	10.5	6.1	6.6	0.1	0.2	0.2	0.1	0.1	1	1.4	1	1.3	0.9	0.6	0.6	0.3	0.5	0.4	0.5	0.3	0.5	0.4	1.6
AgB01	688829	704334	AgB01_g045_t07	-	5119	14	Transporter, partial	SL		N	N	N	7.8	32.6	10.2	6.2	6.5	0.1	0.2	0.2	0.1	0.1	1	1.5	1	1.2	0.8	0.5	0.4	0.2	0.2	0.2	0.3	0	0.2	0.1	1
AgB01	688829	704334	AgB01_g045_t08	-	5191	14	Transporter, partial	SL		N	N	Y	8	33.4	10.5	6.5	6.9	0.1	0.2	0.1	0.1	0.1	0.9	1.4	0.9	1.2	0.8	0.4	0.4	0.2	0.2	0.1	0.2	0	0.2	0.1	0.2
AgB01	688829	704334	AgB01_g045_t09	-	4249	15	Transporter, partial	SL		N	Y	N	9.6	40.3	12.8	7.9	8.4	0.1	0.2	0.2	0.2	0.1	1.1	1.7	1.1	1.4	1	0.5	0.5	0.2	0.2	0.1	0.3	0	0.3	0.1	0.2
AgB01	709492	722577	AgB01_g046_t01	+	3279	15	Dolichyl-diphosphooligosaccharide--protein glycosyltransferase subunit 2	SL	Telo	N	N	Y	50.3	23.4	35.1	26.2	27.6	45.3	27.4	28.2	21.8	24.8	2.9	3	4.5	7.1	8.2	10.6	9	18	20.7	41.5	35.1	9	31.3	25.9	29.3
AgB01	709773	722577	AgB01_g046_t02	+	2667	15	Dolichyl-diphosphooligosaccharide--protein glycosyltransferase subunit 2	SL	Telo	N	Y	N	61.5	28.4	43	32.2	33.8	55.6	33.7	34.6	26.8	30.4	3.6	3.7	5.5	8.6	10.1	13	11.1	22.1	25.5	51	43.1	11	38.6	31.7	35.9
AgB01	724001	732216	AgB01_g047_t01	+	3341	9	Acyl-CoA synthetase family member 3			N	N	N	4.1	0.5	2.2	0.9	0.3	4.1	4.5	4.7	0.6	1.5	5.2	4.6	3.4	7	4.3	5.2	3.7	3.6	2.9	1.4	1	1	2.1	1.2	0.5
AgB01	724001	732216	AgB01_g047_t02	+	3464	10	Acyl-CoA synthetase family member 3			N	Y	Y	4.3	0.5	2.2	0.9	0.4	4.3	4.7	5	0.6	1.5	5.4	4.6	3.3	7.3	4.4	5.2	3.9	3.8	3	1.5	1	1	2.2	1.2	0.5
AgB01	754789	771611	AgB01_g048_t01	+	3368	12	Yorkie	SL		N	Y	Y	1.5	1.3	18.3	36.5	23.3	12.7	17.7	16.8	15.9	8	7	7.7	10.3	11.8	8.9	5.1	3.6	1.6	0.8	9.3	22.8	13.9	4.3	4.1	3.7
AgB01	772180	772823	AgB01_g049_t01	.	644	1	hypothetical protein			N	Y	Y	0	0.3	0.1	0.1	0	0	0	0	3.1	2.3	0	0.2	0	0	0.2	0.1	0	0	0	0.5	0.6	0	0.6	0.2	0.2
AgB01	777949	789269	AgB01_g050_t01	-	3671	9	Protein FAM43A	SL		N	N	N	53.4	52.9	68.1	11.5	103.9	15.5	22.2	22.7	30.5	2.6	18.5	11.6	9.1	14.1	11	7.8	7.3	12	11.1	14.4	15.2	4.2	6.5	1.4	1.7
AgB01	777949	789549	AgB01_g050_t02	-	3945	9	Protein FAM43A	SL		N	N	Y	15.3	16.9	13	4.6	15.9	7	7	6.9	7.9	2	16.5	10.1	7.6	12.8	9.9	7.1	5.2	9.7	9.3	12.9	12.9	2.6	4.1	0.6	0.9
AgB01	777949	813077	AgB01_g050_t03	-	3603	10	Protein FAM43A	SL		N	Y	N	16.3	18	13.7	5	17.3	7.6	7.3	7.5	8.4	2.2	18.1	11.1	8.5	13.9	10.8	7.7	5.8	10.6	10.3	14.2	14.2	2.9	4.4	0.7	1
AgB01	837674	846680	AgB01_g051_t01	-	1835	6	Zinc finger HIT domain-containing protein 1	SL		N	Y	Y	7.6	1.8	1.2	0.5	1.4	5.9	4.4	4.1	2.9	2.3	10.3	7.2	6.3	20.2	14.4	11.6	5.5	11.9	10.6	6.9	5.9	2.8	1.2	0.4	0.4
AgB01	842318	846680	AgB01_g051_t02	-	1305	5	Zinc finger HIT domain-containing protein 1	SL		N	N	N	7.5	1.9	1.3	0.6	1.7	7.7	5.5	5.2	3.9	2.2	9.6	8.7	7.8	24	15.1	13.3	7.5	10.3	9.7	6.1	4.9	2.6	1.1	0.2	0.4
AgB01	847241	857495	AgB01_g052_t01	+	3594	11	UBX domain-containing protein 7	SL		N	Y	N	7.6	2	2.2	0.3	1.6	5.2	4.8	5.5	3	1.7	12.3	9.7	9.5	19.9	17.1	9.9	7	10	10.9	9.7	7.5	1.9	1.1	0.3	0.7
AgB01	847241	857495	AgB01_g052_t02	+	4097	11	UBX domain-containing protein 7	SL		N	N	Y	6.7	1.8	1.9	0.2	1.4	4.5	4.3	4.8	2.6	1.5	10.8	8.5	8.3	17.5	15	8.7	6.1	8.8	9.6	8.6	6.7	1.7	0.9	0.3	0.6
AgB01	863221	866195	AgB01_g053_t01	-	669	4	beta-lactamase domain-containing protein 2			N	Y	Y	1	0.2	5.8	0.8	0.7	1.4	2.4	1.2	3.1	1.6	0	0.3	0.5	0.1	0	0.1	0	0	0.1	0	22.7	2.6	4.6	4.6	25.4
AgB01	873238	880689	AgB01_g054_t01	+	1286	9	degenerin del-1			N	Y	N	1	0.5	1.4	17.7	11.2	2.1	5.1	5.9	1.5	0.6	2.5	1.7	2.3	4.3	1.1	1	0.6	0.5	1.4	1.9	2.4	0	1.3	0.2	0
AgB01	873238	880689	AgB01_g054_t02	+	1319	9	degenerin del-1			N	N	Y	1	0.5	1.4	17	10.9	2	4.9	5.6	1.3	0.5	2.2	1.5	2.2	3.6	1	0.9	0.6	0.5	1.3	1.7	2	0	1.3	0.1	0
AgB01	882421	887413	AgB01_g055_t01	-	996	4	BTB/POZ domain-containing protein KCTD16	SL		N	Y	Y	0.3	0.4	0.1	0	1	0	0.1	0	0	0	0	0	0	0	0.8	0.6	0.2	2	1.1	0.4	1	0	15.9	4.3	72.1
AgB01	888677	909137	AgB01_g056_t01	-	1442	3	hypothetical protein		Telo	N	N	Y	1310.6	4370.7	478.9	9.3	106.9	1.5	1.8	0.5	3.2	7.4	0.6	1.2	3.2	0.2	0.3	0.5	1.1	0.1	0	0.3	6.1	0	31.9	0.9	27.4
AgB01	892673	908099	AgB01_g056_t02	-	705	4	hypothetical protein		Telo	N	N	N	3703	16703.5	13879	122.4	1194.6	9.5	9.3	3.1	15	31.7	3.4	5.1	15.7	2.9	2.2	3.4	4.3	2.4	0.7	1.5	42.5	0	125.7	5.2	135.8
AgB01	892673	908099	AgB01_g056_t03	-	705	3	hypothetical protein		Telo	N	Y	N	1093.2	4816	4271	33.2	284.3	3.1	3	0.9	5.6	9.2	1.3	2.1	4.9	1	1	1.2	1.4	1	0.3	0.6	18.1	0	30.9	1.3	36.4
AgB01	892673	909137	AgB01_g056_t04	-	1254	4	hypothetical protein		Telo	N	N	N	1249.8	4460.2	3172.6	30	253.3	3.2	2.6	0.9	4.5	3.9	0.6	0.8	2.1	0.5	0.5	0.7	1	0.6	0.1	0.5	9.3	0	30.7	1.5	35.5
AgB01	888677	899220	AgB01_g057_t01	+	546	3	hypothetical protein		Telo	N	N	N	1492.3	4291.8	1686.8	0	155.7	2.8	2.9	0.7	6.5	8.7	2.3	2.5	4.3	1.2	1.1	1	2.7	0.8	0.1	0.5	5.9	0	34.7	1.5	51.5
AgB01	888677	909291	AgB01_g057_t02	+	758	3	hypothetical protein		Telo	N	N	N	4512.3	16304	5536.2	66.4	727.9	7.1	7.5	2.2	9.6	31.7	3.4	5.2	16.9	2.7	2.1	3	5.3	1.2	0.4	1.2	25.2	0	133.3	4.2	141.3
AgB01	888739	899220	AgB01_g057_t03	+	787	2	hypothetical protein		Telo	N	N	N	4867.9	17239.2	5531	68.8	739.3	7.1	8.1	2.5	10.8	30.9	4.3	5.1	18.6	2.8	2.6	3.4	6.2	1.3	0.4	1.3	28.9	0	127	4.2	143.8
AgB01	888761	896065	AgB01_g057_t04	+	2716	2	hypothetical protein		Telo	N	N	Y	117.7	357.3	145.2	1.5	17.2	0.3	0.2	0	0.6	2.4	0.3	0.3	0.5	0.3	1.1	0.7	0.7	0.3	0.2	0.6	0.8	0	5.2	0.2	4.5
AgB01	897855	899220	AgB01_g057_t05	+	677	2	hypothetical protein		Telo	N	N	N	2168.5	6125	2916	30.9	335.5	2.9	3.7	0.9	4.4	12.1	2	2.6	4.6	1.3	1.1	1.3	1	0.6	0.4	1.1	10	0	36.8	1.2	60.1
AgB01	897867	899220	AgB01_g057_t06	+	1354	1	hypothetical protein		Telo	N	N	N	1035.2	3014.2	1544.7	15.5	166.9	1.5	1.7	0.4	2	4.8	0.9	1.3	2.5	0.6	0.6	0.8	0.5	0.3	0.2	0.6	5.3	0	16.5	0.5	25.5
AgB01	907421	909291	AgB01_g057_t07	+	891	2	hypothetical protein		Telo	N	Y	N	2291	9102.6	7529.7	67.3	834.3	4.8	5.2	2	13	16.9	0.9	3.1	7.4	1.5	1.7	1.3	4	1.3	0.5	0.8	15.4	0	82.7	2.1	73.7
AgB01	905465	906488	AgB01_g058_t01	.	1024	1	hypothetical protein			N	Y	Y	0.8	2.2	0.6	0	0.1	0	0	0	0	0.1	1.2	0.4	0.1	0.7	0.4	0.3	0.3	0.4	0.8	0.9	0.4	0	0	0	0
AgB01	957215	963875	AgB01_g059_t01	+	1053	6	hypothetical protein		Telo	N	Y	Y	39.5	42.4	7.4	0.4	1.4	0	0	0	0	0.1	0.1	0	0	0.2	0.4	0.4	0	0	0	0	0.2	0	0.2	0.1	0
AgB01	957220	957599	AgB01_g059_t02	+	380	1	hypothetical protein		Telo	N	N	N	2.1	2.3	0.5	0	0.5	0	0	0	0	0	0	0	0	0.1	0	0	0	0	0	0	0	0	0	0	0
AgB01	957251	963875	AgB01_g059_t03	+	937	6	hypothetical protein		Telo	N	N	N	42.6	43.1	7.4	0.3	1.6	0	0	0	0	0.1	0.1	0.1	0	0.2	0.4	0.4	0	0	0	0	0.1	0	0.2	0	0
AgB01	968391	1000716	AgB01_g060_t01	-	2133	13	ligand-gated ion channel 50			N	Y	Y	0	0.1	0.1	0.4	1	0.1	0.5	0.3	0.2	0.1	0.1	0.1	0	0.1	0.3	0.3	1.7	1.9	0.7	0.3	10.6	3.2	1	0.7	0
AgB01	969502	972611	AgB01_g060_t02	-	217	3	ligand-gated ion channel 50			N	N	N	0	0.1	0.3	0.5	2	0	1.3	0.5	0	0	0.6	0.7	0	0.2	0.9	0.3	0.5	3.3	0.8	0	10.6	0	5.3	4.5	0
AgB01	985744	1000716	AgB01_g060_t03	-	1028	5	hypothetical protein			N	N	N	0	0	0	0	0	0.2	0.1	0	0	0	0	0	0	0	0	0.3	0.8	1.5	0.6	0.3	7.9	3.4	0.1	0.1	0
AgB01	986969	1000716	AgB01_g060_t04	-	1131	4	hypothetical protein			N	N	N	0	0.1	0.2	0	0	0.2	0.1	0	0	0	0.1	0	0	0	0.1	0.3	1	1.5	0.5	0.3	7.3	3.1	0.1	0.1	0
AgB01	1001683	1008033	AgB01_g061_t01	-	1954	7	hypothetical protein	SL		N	N	N	5.8	1.8	1.5	0.3	0.7	11.8	8	8.3	4.9	10.5	33.6	21.6	13.9	26.9	21.7	15.4	8.7	13.5	15.2	10.7	9.3	1.8	3.3	1.2	0.5
AgB01	1001683	1008033	AgB01_g061_t02	-	1954	7	hypothetical protein	SL		N	N	N	5.8	1.8	1.5	0.3	0.7	11.7	7.8	8.1	4.9	10.4	33.2	21.4	13.7	26.7	21.4	15.3	8.7	13.3	15.1	10.6	9.1	1.8	3.3	1.2	0.5
AgB01	1001683	1008033	AgB01_g061_t03	-	1822	6	hypothetical protein	SL		N	N	N	6.2	1.9	1.6	0.3	0.7	12.4	8.2	8.6	5.2	10.4	34	21.5	13.8	27	22	15.9	8.9	13.9	15.5	11.1	9.7	1.9	3.5	1.3	0.5
AgB01	1001683	1008946	AgB01_g061_t04	-	2714	6	hypothetical protein	SL		N	N	N	4.8	1.3	1.1	0	0.5	9.1	5.8	6.1	3.7	7.3	23.7	14.8	9.4	19.4	18	12.6	7.1	12.1	13.8	11.2	10.8	1.3	2.8	0.9	0.4
AgB01	1001683	1012744	AgB01_g061_t05	-	1971	12	hypothetical protein	SL		N	N	N	6.9	1.8	1.7	0.7	1.2	15.9	12.5	13.1	5.6	12.1	36.7	25	16.3	31.4	30.9	23.3	14.2	19.3	21.9	18.8	18.6	4.4	4.3	1.3	0.8
AgB01	1001683	1012744	AgB01_g061_t06	-	1996	12	hypothetical protein	SL		N	N	N	6.9	1.9	1.7	0.7	1.2	15.8	12.5	13.2	5.5	12	36.7	25	16.3	31.4	30.8	23.2	14.1	19.4	21.9	18.7	18.6	4.3	4.3	1.3	0.8
AgB01	1001683	1012744	AgB01_g061_t07	-	1975	12	hypothetical protein	SL		N	N	N	7	1.9	1.8	0.7	1.2	16.3	12.8	13.4	5.6	12.2	36.9	25	16.1	31.9	31.1	23.4	14.4	19.6	22.2	18.9	18.6	4.4	4.3	1.3	0.9
AgB01	1001683	1022149	AgB01_g061_t08	-	3093	20	Prolactin regulatory element-binding protein	SL		N	N	Y	7.9	1.9	2.5	1.2	2.5	17.1	11.4	12	5.1	8.1	26.6	17.8	12.8	30.6	26.7	21.5	12.4	21.7	22.8	19.2	16.9	5	4.4	1.6	1.3
AgB01	1015252	1022149	AgB01_g061_t09	-	1852	8	Prolactin regulatory element-binding protein			N	N	N	6.1	1.2	2.3	1.2	3	11.8	5.8	6.3	2.9	2.4	9.5	6.8	6.9	22.3	20.8	19.2	10.5	21.5	21.4	20.6	16	6.5	4.1	1.9	1.7
AgB01	1015252	1022512	AgB01_g061_t10	-	1948	9	Prolactin regulatory element-binding protein			N	Y	N	6.1	1.1	2.3	1.3	3	11.7	5.9	6.2	2.8	2.6	10.5	7.5	7.3	22.6	21.7	20	11	22	22.5	21.7	16.4	6.2	4	2	1.7
AgB01	1024140	1027265	AgB01_g062_t01	+	1028	4	Prolactin regulatory element-binding protein			N	Y	N	2.7	0.5	1.1	0.5	0.6	3.6	1.9	1.8	1	1.1	3.5	3.4	4.3	7.6	8.1	7.2	5.6	6.9	6.4	6.7	4.7	1.7	1.2	0.4	0.4
AgB01	1025196	1027265	AgB01_g062_t02	+	1260	3	Prolactin regulatory element-binding protein			N	N	Y	2.3	0.4	0.9	0.4	0.5	3	1.5	1.4	0.8	1.2	3.6	3.3	3.9	6.9	7.9	6.9	4.8	6.4	6.3	7	4.4	1.4	1	0.4	0.4
AgB01	1025258	1027265	AgB01_g062_t03	+	930	4	Prolactin regulatory element-binding protein			N	N	N	3.1	0.6	1.2	0.5	0.6	4	2.1	1.9	1.1	1.2	4	3.5	4.9	8.6	9.6	8.4	6.2	7.7	7.4	7.8	5.1	1.9	1.3	0.5	0.5
AgB01	1028435	1034249	AgB01_g063_t01	+	4232	3	Ankyrin repeat domain-containing protein 49	SL		N	Y	Y	10.8	1	1.5	1.9	2.9	7.6	5.8	5.5	3	2.2	9.4	7	5.2	17.6	15.6	16.2	11.2	19.4	18.8	15.8	13.7	3.3	2.9	1.4	0.8
AgB01	1028435	1034249	AgB01_g063_t02	+	3552	4	Ankyrin repeat domain-containing protein 49	SL		N	N	N	12.6	1.1	1.7	2.2	3.5	8.9	6.8	6.5	3.5	1.8	6.6	5.9	5.4	15.6	12.5	13.4	11.3	18.2	17.8	14.2	12.5	2.4	2.7	1.4	0.9
AgB01	1034399	1040038	AgB01_g064_t01	+	2933	6	ZDHHC-type palmitoyltransferase 2	SL		N	Y	N	6.2	0.7	2.9	1.3	1.1	17.1	19.5	19.6	4.9	7.8	27.8	12.8	10.8	21.7	17.2	11.5	4.8	8	6	5.9	5	2.4	2.7	1	0.8
AgB01	1034430	1040038	AgB01_g064_t02	+	2973	6	ZDHHC-type palmitoyltransferase 2	SL		N	N	Y	6.2	0.7	2.9	1.2	1.1	16.7	19.2	19.1	4.8	7.7	27.5	12.6	10.6	21.4	17.1	11.4	4.8	7.9	5.9	5.9	5	2.3	2.7	1	0.8
AgB01	1040270	1041905	AgB01_g065_t01	-	1316	2	85 kDa calcium-independent phospholipase A2			N	N	N	3.8	0.9	0.2	0.3	0	2.5	3.6	4.4	7.1	7.2	34.7	17.5	13.1	33.8	15.9	13.3	5.3	9.8	11.1	12.2	11.4	2.6	3	2.1	1.5
AgB01	1040270	1053476	AgB01_g065_t02	-	3042	16	85 kDa calcium-independent phospholipase A2	SL		N	Y	Y	39	6.6	7.4	3.4	5.2	23.6	40.9	38.7	22.3	11.1	44.2	33.8	39.2	65.3	26.8	26.4	15.7	17.2	19.2	20.1	17.7	9.1	4.1	2.9	2.9
AgB01	1043243	1047190	AgB01_g065_t03	-	1894	5	85 kDa calcium-independent phospholipase A2			N	N	N	11.2	1.8	3.2	0	1.7	9.3	12.9	11.6	10.3	6.2	22.1	22.8	28.9	35.8	13.1	14.7	10.6	11	13.3	14	11.9	6.4	1.9	1.3	2
AgB01	1043243	1047190	AgB01_g065_t04	-	1916	5	85 kDa calcium-independent phospholipase A2			N	N	N	10.8	1.7	3.1	0.9	1.6	8.5	11.7	10.8	10	5.8	20.4	21.5	27.4	33.7	12.3	13.8	10	10.7	13	13.5	11.6	6.3	1.8	1.2	2
AgB01	1043243	1053459	AgB01_g065_t05	-	2826	13	85 kDa calcium-independent phospholipase A2	SL		N	N	N	41.1	6.6	7.9	3.5	5.6	23.2	41	38.5	19.3	7.8	26.6	23.9	32.5	48.9	19.6	20.4	13.7	15.2	16.8	17.1	15.3	9.2	2.8	2	2.3
AgB01	1046049	1053459	AgB01_g065_t06	-	1687	10	85 kDa calcium-independent phospholipase A2	SL		N	N	N	59.9	9.9	10.6	5.2	8.2	32.3	59	55.9	23.7	8.2	27.5	23.9	34.1	55.6	23.2	22.8	17.6	16.1	16.7	16.8	15.5	11.3	3.1	2.3	2.2
AgB01	1051342	1053459	AgB01_g065_t07	-	914	3	85 kDa calcium-independent phospholipase A2	SL		N	N	N	24.4	4.7	3.7	2.4	4.2	13.3	13.5	11.6	3.4	1.7	8.3	2.7	2	10.8	12.2	10.6	4.2	11.6	11.5	11	10.4	5.7	1.6	1.3	1.5
AgB01	1054381	1062232	AgB01_g066_t01	-	3040	10	Protein FAM114A2	SL		N	Y	N	8.7	8.1	1.5	0.3	0.6	1.3	1.5	1.1	3.7	7.5	13.5	9.4	9.5	18.4	12	7.5	4.3	12.2	11.2	12.2	12.8	8.5	5.4	3.5	1.4
AgB01	1054381	1063721	AgB01_g066_t02	-	3204	10	Protein FAM114A2	SL		N	N	Y	8.3	7.8	1.5	0.2	0.5	1.2	1.4	1.1	3.6	7.3	13.1	9	9.2	17.9	11.6	7.2	4.2	11.6	10.7	11.7	12.4	8.1	5.3	3.4	1.3
AgB01	1074106	1083892	AgB01_g067_t01	+	3037	7	carrier triple repeat protein 1	SL		N	Y	Y	1.5	0.2	0.7	0.4	0.5	3.5	1.6	1.7	0.9	0.6	1.5	1.9	0.8	3.9	3.7	3.5	1.1	4.5	4	3.5	3.5	2.3	5.6	12.7	0.5
AgB01	1077187	1078258	AgB01_g067_t02	+	1072	1	Carrier triple repeat protein 1, partial	SL		N	N	N	1.9	0.3	0.3	0.1	0	1.5	0.9	1	0.5	0.6	0.4	0.7	0.4	1.8	1.7	1.1	0.4	1.6	1.7	1	1.3	0	1.7	2.5	0.2
AgB01	1078442	1079896	AgB01_g067_t03	+	1455	1	Carrier triple repeat protein 1, partial			N	N	N	1	0.2	0.6	0.4	0.7	2.9	1.1	1.2	0.8	0.3	0.8	2.4	0.7	3.2	2.3	2.7	0.9	2.4	3.4	2.9	2.3	0	1.8	4.5	0.1
AgB01	1086244	1165610	AgB01_g068_t01	+	3209	20	Spermatogenesis-associated protein 13	SL		N	N	N	0.2	0.2	0.4	0.2	1.1	9.1	16.3	15.9	10.6	4.4	16	16.1	17.4	40.2	9.4	6.5	6.4	1.3	0.7	2.1	27.7	4.3	1.2	2.1	1
AgB01	1086324	1165610	AgB01_g068_t02	+	3498	18	spermatogenesis-associated protein 13	SL		N	N	N	0.1	0.2	0.3	0.2	1	8.2	14.5	14	9.7	4.2	14.8	15.2	16.1	36.6	8.8	6.1	5.7	1.2	0.6	2	25.6	4	1.1	1.8	0.9
AgB01	1093315	1165610	AgB01_g068_t03	+	3601	18	spermatogenesis-associated protein 13	SL		N	N	Y	0.1	0.2	0.3	0.1	1	7.3	13	12.3	8.1	3.8	13.6	13.6	14.9	33.9	8.2	5.5	5.2	1.1	0.5	1.7	23	3.4	1	1.7	0.9
AgB01	1093315	1165610	AgB01_g068_t04	+	3601	18	spermatogenesis-associated protein 13	SL		N	N	N	0.1	0.2	0.3	0.2	1	8.1	14.4	14	9.3	3.9	13.9	14	15.3	35.2	8.4	5.8	5.5	1.2	0.6	1.9	24.8	3.8	1.1	1.8	0.9
AgB01	1112391	1118378	AgB01_g068_t05	+	1091	2	hypothetical protein	SL		N	Y	N	0.8	0.5	0.1	0.1	0.3	0.5	0.8	0.8	0.6	8	21.7	22.3	17.3	16	9.4	4.1	2.4	0	0.1	0.1	2.9	1.6	0.6	0.4	0.4
AgB01	1093633	1096843	AgB01_g069_t01	+	633	3	hypothetical protein			N	Y	Y	0	0	0	0	0	0.1	0.7	0.7	0.9	0.4	2.4	1.9	0.3	2.8	1	1	0	0.2	0	0	0.3	0	1.1	0.2	0.1
AgB01	1094548	1096843	AgB01_g069_t02	+	382	2	hypothetical protein			N	N	N	0	0	0	0	0	0.1	0.7	0.7	0.9	0.7	2.2	1.6	0	3.3	1.1	0.8	0	0.3	0	0	0.3	0	1.6	0.1	0.1
AgB01	1154820	1156276	AgB01_g070_t01	-	871	2	spermatogenesis-associated protein 13			N	Y	Y	0.1	0.1	0.1	0.1	0	3.6	6.4	7.4	5.6	0.6	2	1.5	1.7	7.6	1.2	1.5	1.3	0.2	0.6	0.7	8.4	2	0.2	0.6	0.1
AgB01	1166093	1170905	AgB01_g071_t01	-	1707	9	acetylcholine receptor subunit alpha-type deg-3			N	Y	Y	0	0.9	0.1	0.6	0	0	0	0	0	0	0	0	0	0.1	0.2	0.2	0	0	0	0	0	0	1	0.1	1.3
AgB01	1175370	1180892	AgB01_g072_t01	+	1559	8	hypothetical protein	SL		N	N	Y	17.9	52.6	13.3	5.5	3.4	0	0.1	0	0	0.2	0.7	1.1	0.8	0.9	1	0.2	0	0	0	0.1	0.6	1.1	0.7	0.1	0.1
AgB01	1177326	1180892	AgB01_g072_t02	+	1317	5	hypothetical protein	SL		N	N	N	16.6	54.6	12.8	4.7	3	0	0.1	0	0	0.2	0.7	1.2	0.7	0.8	1.2	0.2	0	0	0	0.1	0.7	1.3	0.7	0	0.2
AgB01	1178345	1180892	AgB01_g072_t03	+	1125	5	hypothetical protein	SL		N	Y	N	21.4	49.1	15.7	7.6	4.3	0	0.1	0	0	0.3	0.9	1.5	1.2	1.2	1.2	0.2	0	0	0	0.1	0.8	1.5	0.7	0.1	0.2
AgB01	1183167	1193419	AgB01_g073_t01	-	2595	13	Propionyl-CoA carboxylase alpha chain			N	N	N	635.4	531	789.1	1410.8	394.6	888.7	864.2	955.9	398.7	271.1	284.6	219.2	185.3	150.6	33.9	18.9	8.9	8.3	4.4	35.5	89.8	209.8	288.5	267.4	823.7
AgB01	1183167	1193424	AgB01_g073_t02	-	2600	12	Propionyl-CoA carboxylase alpha chain			N	Y	Y	634.3	530.1	787.9	1408.6	393.9	887.4	862.9	954.3	397.9	270.6	284	218.7	184.9	150.3	33.8	18.9	8.9	8.3	4.4	35.4	89.7	209.4	288.2	267	822.7
AgB01	1183167	1193424	AgB01_g073_t03	-	2600	12	Propionyl-CoA carboxylase alpha chain			N	N	N	634.3	530.1	787.9	1408.6	393.9	887.4	862.9	954.3	397.9	270.6	284	218.7	184.9	150.3	33.8	18.9	8.9	8.3	4.4	35.4	89.7	209.4	288.2	267	822.7
AgB01	1194127	1194558	AgB01_g074_t01	-	432	1	Propionyl-CoA carboxylase alpha chain			N	Y	Y	194.7	251	457.5	749.2	204.8	561.3	291.5	386.9	242.4	134.7	109.4	99.7	69.9	78.1	18.1	8.3	1.4	2.3	1.1	19.2	42.5	148.1	100.2	106.6	325.1
AgB01	1194887	1196306	AgB01_g075_t01	-	302	3	Propionyl-CoA carboxylase alpha chain	SL		N	N	N	132.2	172.8	226.7	430.7	112.2	240.7	203.5	212.9	163.7	295.6	280.2	181.4	124.3	113.6	32.6	10.7	3.6	1.9	0.7	22	56.7	194.6	172.3	185	617.2
AgB01	1194887	1196801	AgB01_g075_t02	-	252	3	Propionyl-CoA carboxylase alpha chain	SL	Telo	N	N	N	157.4	203.7	271.5	516.1	134.5	288.5	243.9	255.3	196.2	354.3	335.8	217.4	148.9	136.1	39.1	12.9	4.3	2.2	0.8	26.3	68	233.2	197.7	219.6	731
AgB01	1194887	1196892	AgB01_g075_t03	-	338	3	Propionyl-CoA carboxylase alpha chain	SL	Telo	N	N	N	119.2	157.4	202.8	385.1	100.3	215.2	181.9	190.6	146.3	263.1	250.5	161.3	111.2	101.2	29.1	9.4	3.2	1.7	0.6	19.6	50.4	173.9	158.1	174.4	583
AgB01	1194887	1198232	AgB01_g075_t04	-	1682	3	Propionyl-CoA carboxylase alpha chain	SL	Telo	N	N	Y	24.8	31.9	40.9	77.8	20.2	43.7	37.1	38.5	29.5	53.2	50.5	32.8	22.3	20.5	5.9	2	0.6	0.3	0.1	4	10.2	34.9	31.8	34.8	116.6
AgB01	1194887	1199070	AgB01_g075_t05	-	396	3	Propionyl-CoA carboxylase alpha chain	SL	Telo	N	Y	N	100.2	130.5	172.8	328.4	85.6	183.6	155.2	162.5	124.8	255.7	237.4	155.4	103.7	98.7	29.3	9	3.3	1.6	0.5	18.2	50.3	148.4	135.1	148.8	498.8
AgB01	1196421	1196799	AgB01_g076_t01	.	379	1	hypothetical protein		Telo	N	Y	Y	3.6	2.1	0.8	0.1	0.2	0	0.4	0.8	0	0	0.3	0	0	0.5	0	0	0.3	0	0	0.1	0	0	0	0	0
AgB01	1200403	1213325	AgB01_g077_t01	+	594	3	hypothetical protein			N	N	Y	0.2	0.2	2.3	0.1	0.2	0.1	0.2	0.2	0.2	0.1	0.3	1.2	0.1	0.5	0.8	0.1	0	0	0.1	0.2	0.3	0	0.3	0	0.4
AgB01	1211436	1213325	AgB01_g077_t02	+	273	2	hypothetical protein			N	Y	N	0.4	0.4	5	0.1	0.4	0.2	0.1	0.4	0.4	0.8	0.5	2.7	2.3	1.1	1.7	0.1	0	0	0.2	0.4	0.6	0	0.7	0.1	0.9
AgB01	1210644	1214694	AgB01_g078_t01	-	853	4	G-protein coupled receptor			N	N	N	0.3	0.5	1.7	0.2	0.3	2.6	3.1	2.3	1.4	0.6	2.7	2.3	2.3	4.5	3.9	1.7	0.3	0.2	0	0.5	0.5	0	0.2	0	0.6
AgB01	1210644	1214706	AgB01_g078_t02	-	958	4	G-protein coupled receptor			N	Y	Y	0.3	0.5	0.8	0.2	0.1	2.2	2.7	1.9	1.2	0.5	2.5	1.9	2.3	4.1	3.1	1.7	0.6	0.2	0	0.4	0.5	0	0.1	0	0.3
AgB01	1217331	1223845	AgB01_g079_t01	-	1162	4	Putative G-protein coupled receptor F59B2.13			N	Y	Y	0.2	0.3	0.3	0	0	0.7	0.9	0.5	0.4	0.3	1.4	1.5	1.2	1.8	1.5	0.9	0.4	0.2	0	0.1	0.3	0	0	0	0
AgB01	1228201	1230382	AgB01_g080_t01	+	479	3	hypothetical protein			N	Y	Y	4.3	5.7	2.3	0.7	3.4	3.3	1.2	1.2	1.4	0.5	1.6	1.2	0.9	4.3	15.7	12.8	7.1	26.9	28.3	24.6	23.1	3.6	5.1	1.2	2
AgB01	1240592	1253638	AgB01_g081_t01	+	3515	14	Uncharacterized protein tag-51	SL		N	Y	N	5.4	3.7	1.8	0.1	1.3	2.3	0.7	0.5	0.2	0.3	0.7	0.6	0.8	1.7	3	4.7	4.2	9.5	12.9	10.3	8	2.5	0.7	0.4	0.5
AgB01	1245944	1253638	AgB01_g081_t02	+	3309	8	hypothetical protein			N	N	N	8	6.7	2.2	0.1	1.2	1.8	0.5	0.3	0.2	0.2	0.6	0.6	0.7	1.5	2.8	4.3	3.9	10.3	13.1	10.5	7.9	3.7	0.9	0.4	0.4
AgB01	1245996	1253638	AgB01_g081_t03	+	2709	9	Uncharacterized protein tag-51			N	N	N	9.4	8	2.2	0.1	1.5	2.1	0.6	0.4	0.2	0.2	0.6	0.7	0.8	1.8	3.2	4.7	4.4	11.3	14.5	11.6	8.7	3.8	1	0.4	0.5
AgB01	1246239	1253638	AgB01_g081_t04	+	3165	8	Uncharacterized protein tag-51			N	N	N	8.1	6.9	2	0.1	1.3	1.8	0.5	0.3	0.1	0.2	0.6	0.6	0.7	1.6	2.8	4.1	3.7	10	12.5	10	7.5	3.3	0.9	0.3	0.4
AgB01	1248955	1253638	AgB01_g081_t05	+	4684	1	hypothetical protein			N	N	Y	3.3	3.6	0.8	0	0.5	0.5	0.2	0.1	0.1	0.1	0.2	0.4	0.5	0.6	1.1	1.8	1.4	4.6	5.9	4.5	3.6	0.7	0.4	0.1	0.2
AgB01	1249336	1253638	AgB01_g081_t06	+	3239	3	hypothetical protein			N	N	N	7.2	7.2	1.5	0.1	1	0.8	0.4	0.1	0.1	0.1	0.4	0.5	0.7	1.1	2.2	3	2.5	7.7	9.8	7.6	6.2	2.7	0.7	0.2	0.3
AgB01	1252238	1256773	AgB01_g082_t01	-	1347	6	hypothetical protein		Telo	N	Y	Y	25.8	30.5	3.5	0.2	2.1	0.1	0.1	0	0	0.2	0.4	0.5	0.7	1.2	2.6	2.5	3.2	3.4	3.2	2.5	2.3	3.9	0.5	0.1	0.2
AgB01	1261019	1267041	AgB01_g083_t01	+	3112	5	tRNA-splicing endonuclease	SL		N	N	Y	5.3	0.3	0.6	0.2	1.7	6.7	3.2	3.1	0.4	0.2	1.4	1.6	1.4	3	4.5	4.4	3.7	10.5	11.6	6.7	5.4	2.8	1	0.3	0.3
AgB01	1261034	1264600	AgB01_g083_t02	+	1775	4	hypothetical protein	SL		N	Y	N	5.7	0.5	0.8	0.4	2.1	8.7	4	3.9	0.6	0.2	1.3	1.1	1.8	3.1	4.2	4.6	4	10.4	12.4	6.8	5.3	2.9	0.9	0.3	0.2
AgB01	1263182	1267041	AgB01_g083_t03	+	2102	3	tRNA-splicing endonuclease			N	N	N	4.9	0.2	0.3	0	1.4	4.7	2.2	2.5	0.1	0.2	1.1	1.5	0.8	2.4	4.1	3.7	2.7	9.3	9.2	5.6	4.8	1.6	0.8	0.3	0.3
AgB01	1264981	1267041	AgB01_g083_t04	+	2061	1	hypothetical protein			N	N	N	2.9	0.1	0.3	0	0.7	2.4	1.4	1.3	0.1	0.1	1.1	1.4	0.5	1.9	3.2	2.8	2.3	7.3	7.5	4.7	4.1	1.7	0.7	0.3	0.2
AgB01	1267812	1271070	AgB01_g084_t01	+	670	3	U6 snRNA-associated Sm-like protein LSm2	SL		N	Y	Y	49.6	5.7	2.6	3.2	7.6	39.2	34.5	37.3	22.7	20.3	105	68.9	43	183.1	81.1	44.8	46.6	67.9	50.9	23.6	29.7	7.7	17.8	12.1	3.2
AgB01	1290883	1293978	AgB01_g085_t01	+	1429	3	hypothetical protein			N	Y	Y	0	0.1	0	0.7	0.3	0.3	0.3	0.3	0.2	0.3	6.9	4.2	5.5	8	3.7	6.2	11	0.7	0.5	5.4	5.2	3.6	5.7	4.4	0.3
AgB01	1292696	1301575	AgB01_g086_t01	-	1350	6	hypothetical protein			N	N	N	3.6	2.4	2.4	24.7	10.8	10.8	14.3	13.8	2	7.5	6.1	4.9	6.9	9.1	7.3	8.6	10	1.7	2.8	49.7	32	9	30.9	8.7	1.4
AgB01	1292696	1301575	AgB01_g086_t02	-	1551	7	hypothetical protein			N	Y	N	4.4	3.2	3.4	34.4	14	14.3	19.5	18.8	3.1	6.8	2.7	2.3	3.2	4.2	5.5	5.5	4.5	1.5	3	56.3	35.4	6.7	30.6	6.8	1.4
AgB01	1292696	1301585	AgB01_g086_t03	-	2842	6	hypothetical protein			N	N	Y	3	2.1	2.3	22.1	8.6	9	12.2	12.1	2.3	4.1	5	3.8	3.6	4.4	4.2	4.7	3.8	0.9	2.1	36.3	23.8	4.3	19.6	4.6	0.9
AgB01	1303671	1312042	AgB01_g087_t01	-	1884	7	glycogenin-2	SL		N	N	N	3.1	0.7	54.6	223.3	82.2	159.6	192.1	187.3	71.1	42.8	147.4	132.7	85.2	147.8	52.1	35.6	5.9	4.8	19.9	65.6	141.6	78.9	334.1	616	3.9
AgB01	1303671	1312129	AgB01_g087_t02	-	1923	6	Glycogenin-1	SL		N	N	Y	2.9	0.6	51.3	208.9	76.1	157.8	191.8	186.1	69.7	41.1	144.9	129.8	82.9	145.1	50.9	34.7	5.7	4.5	19	63.3	138.3	75.5	328.2	608.5	3.6
AgB01	1303671	1312305	AgB01_g087_t03	-	1374	7	Glycogenin-1	SL		N	Y	N	3.5	0.8	63.5	268.4	97.2	197.8	238.3	231.2	84.2	53	181.7	164.3	98.9	181.2	64.6	44.2	7.2	5.9	24.1	82.9	190.2	96.9	455.4	836.8	4.4
AgB01	1303671	1341510	AgB01_g087_t04	-	1361	7	Glycogenin-1	SL		N	N	N	3.6	0.8	64.1	271	98.1	199.7	240.5	233.4	85	53.6	184.8	167.4	100.6	183.5	65.5	44.7	7.4	6	24.4	84	192.6	97.8	462.9	851.7	4.5
AgB01	1303671	1341510	AgB01_g087_t05	-	1409	8	Glycogenin-1	SL		N	N	N	3.5	0.9	65.8	280.8	101.3	184.9	220.2	215.8	82.5	52.4	175.5	157.9	95.6	175.2	62.7	42.8	7	5.9	24.3	82.2	184.8	98.2	435.4	797.1	4.7
AgB01	1335325	1336358	AgB01_g088_t01	.	1034	1	hypothetical protein			N	Y	Y	0	0	0	0	0	0	0	0	0	0	1.2	0.7	0.1	0.3	0.6	0.5	0.3	0.3	0.2	0.6	0.2	0	0.2	0	0
AgB01	1341975	1370112	AgB01_g089_t01	-	2933	3	G-protein coupled receptor, partial			N	N	Y	4.6	4.8	2.8	4.4	3.1	1.2	3.1	2.6	3.4	1.5	5.9	4.1	3.1	5.8	7.6	5.8	4.9	4.9	4.3	3.3	5.2	2.4	8.7	2.8	2.6
AgB01	1341975	1405301	AgB01_g089_t02	-	2694	4	G-protein coupled receptor, partial	SL	Telo	N	Y	N	5.4	4.7	3.1	4.7	3.7	1.4	3.6	2.8	3.7	1.7	6.4	4.5	3.2	6.2	8.2	6.3	5.3	5.3	4.7	3.5	5.6	2.6	9.4	3	2.7
AgB01	1345832	1351063	AgB01_g090_t01	-	2708	3	putative g-protein coupled receptor			N	Y	Y	0.3	0.2	0.2	3.5	1.2	0.2	0.5	0.3	0	0	0.2	0.2	0.2	0.2	0.5	0.4	0.3	0.2	0	0.1	1.8	0.6	3.5	0.2	0.1
AgB01	1374740	1377547	AgB01_g091_t01	+	828	4	fog-3	SL		N	N	N	21.5	17.1	2.8	0.1	1.3	1.5	2.6	2.7	0.4	1.4	3.3	2.5	1.8	3.6	0.4	0.4	0	0.1	0	0.2	0.2	0	0.4	3.5	0
AgB01	1374740	1377547	AgB01_g091_t02	+	1721	3	fog-3	SL		N	Y	Y	15.4	10.3	1.5	0	0.9	1	1.7	1.7	0.2	0.8	2.2	1.2	0.7	2	0.4	0.3	0	0	0	0.1	0.3	0	0.3	1.8	0
AgB01	1400605	1403074	AgB01_g092_t01	.	2470	1	hypothetical protein			N	N	Y	1.2	2.7	0.2	0	0	0.2	0	0.1	0	0.1	0.1	0.2	0.3	0.2	0.1	0.2	0.2	0.2	0.3	0.3	0.1	0	0.1	0	0
AgB01	1400888	1403074	AgB01_g092_t02	.	2187	1	hypothetical protein			N	Y	N	1.3	3	0.3	0	0	0.2	0	0.2	0	0.1	0.1	0.3	0.3	0.2	0.2	0.2	0.2	0.3	0.3	0.4	0.1	0	0.1	0.1	0
AgB01	1411484	1417660	AgB01_g093_t01	-	941	7	ubiquinone biosynthesis protein coq	SL		N	N	N	24.8	12.6	22.9	14.2	25.5	17.1	18.3	17.3	37.6	17.7	37.5	30.5	21.5	56.9	37.6	65.7	49.3	82.8	69.2	55.8	61.6	47.8	90.5	35.6	44.2
AgB01	1411484	1417694	AgB01_g093_t02	-	1581	6	ubiquinone biosynthesis protein coq	SL		N	N	N	15	7.5	13.7	8.5	15.3	10.2	10.9	10.3	22.5	10.6	22.4	18.2	13	34	22.5	39.2	29.4	49.6	41.2	33.3	36.7	29.5	54.1	21.2	26.5
AgB01	1411484	1420375	AgB01_g093_t03	-	983	7	ubiquinone biosynthesis protein coq	SL		N	Y	N	23.8	12	21.9	13.6	24.4	16.7	17.9	16.7	36	17	36.8	29.7	21.5	55.7	36.8	64.4	50.7	80.6	67.7	54	59.6	45.7	87.6	34.3	42.7
AgB01	1419258	1427728	AgB01_g093_t04	-	3760	5	Translation initiation factor eIF-2B subunit delta, partial		Telo	N	N	Y	2.8	0.8	0.8	0.2	0.7	4.9	3.5	3.8	1.9	1.7	9.1	7.9	6.3	9.7	10.2	11.6	8.6	9.2	8.8	5.8	4.5	2.8	1.7	0.6	0.8
AgB01	1418096	1428186	AgB01_g094_t01	+	7572	4	dna polymerase epsilon subunit 3		Telo	N	Y	Y	2.2	0.5	0.6	0.2	0.6	3.3	2.6	2.3	1	2.7	15.7	10.8	7.1	12	14.9	18.1	10.7	14.3	12.5	8.3	6	3.7	2.3	0.6	0.8
AgB01	1429010	1435193	AgB01_g095_t01	-	1118	8	Translation initiation factor eIF-2B subunit delta			N	N	N	22.8	4.9	6	3	8.6	57	46.2	52.3	17.3	5.1	28.5	33.4	61.9	51.5	31.3	49.6	54.9	36.5	28.4	24.5	19.5	12.4	3.9	2.4	3.5
AgB01	1429010	1435774	AgB01_g095_t02	-	1145	8	Translation initiation factor eIF-2B subunit delta	SL		N	N	Y	22.2	4.9	6	2.7	7.9	55.8	45.8	50.6	17.3	15.2	71.6	92.1	140	71.2	53.2	71.4	88.9	45.2	37.5	36.2	24.9	13.6	4.4	2.7	4.2
AgB01	1429010	1436282	AgB01_g095_t03	-	1078	8	Translation initiation factor eIF-2B subunit delta	SL		N	Y	N	23.6	5.2	6.4	2.9	8.4	59.2	48.7	53.7	18.2	12.9	62.3	76.3	120.8	68.3	46.2	67.9	85.6	44.5	36	35	24.7	12.8	4.7	2.9	4.4
AgB01	1439056	1450305	AgB01_g096_t01	-	1754	7	prolactin-releasing peptide receptor	SL		N	N	N	0	0.5	0.5	0.2	0.2	1.7	6.8	6.7	6	8.7	19.3	20.4	22.7	23.6	5.8	3.7	1.6	1	0.5	0.7	7.8	18.7	2.9	0.2	0
AgB01	1439056	1450305	AgB01_g096_t02	-	1898	8	Neuropeptide FF receptor 2	SL		N	N	N	0	0.5	0.6	0.2	0.2	1.9	7.6	7.6	6.3	8	18	19.5	22	23.7	5.7	3.9	1.1	1.2	0.5	0.6	7.6	18.2	2.9	0.2	0
AgB01	1439056	1450306	AgB01_g096_t03	-	1947	8	Neuropeptide FF receptor 2	SL		N	N	N	0	0.5	0.5	0.2	0.2	1.9	7.8	7.7	6.9	8.2	18.5	19.6	22.2	24.2	5.9	3.9	1.4	1.3	0.5	0.7	7.7	18.6	3	0.2	0
AgB01	1441567	1450305	AgB01_g096_t04	-	2330	7	Neuropeptide FF receptor 2	SL		N	Y	Y	0	0.5	0.4	0.3	0.2	1.5	5.9	5.7	5.2	5.7	17.1	20.5	22.4	20.5	6.7	3.9	1.1	1	0.4	0.5	5.8	14.1	2.3	0.1	0
AgB01	1441567	1450306	AgB01_g096_t05	-	2139	6	prolactin-releasing peptide receptor	SL		N	N	N	0	0.5	0.4	0.3	0.2	1.3	4.9	4.7	4.3	6.1	17.6	21.2	22.8	19.7	6.7	3.7	1.3	0.8	0.5	0.5	5.7	13.7	2.3	0.2	0
AgB01	1530158	1537422	AgB01_g097_t01	-	1341	8	wd repeat-containing protein 47	SL		N	Y	N	0.2	0.2	2.3	0.4	2.2	4.6	14.6	16.3	21.8	13.6	47.5	32.3	25.7	71	26.9	32.2	12.3	9.4	12.5	22.8	34.6	7.7	67	102.3	31
AgB01	1530158	1538924	AgB01_g097_t02	-	1519	9	wd repeat-containing protein 47	SL		N	N	Y	0.2	0.2	2.1	0.4	1.9	4.1	13.7	15.1	20.9	12.5	43.1	30.7	23.4	66	25.5	31	11.6	8.8	11.2	21.2	32.1	6.8	61.9	94.1	28.3
AgB01	1534943	1537422	AgB01_g097_t03	-	336	3	WD repeat-containing protein 47	SL		N	N	N	0	0.1	2.4	0.3	0.4	5.8	14.6	15.9	17.1	19.2	55.6	33.2	28.8	64.3	29.9	28.5	7.8	11.3	14.3	24.1	39.3	0	62.3	99.3	32.1
AgB01	1547368	1552904	AgB01_g098_t01	+	1182	4	hypothetical protein			N	Y	Y	0	0	0.1	0	0	0.1	0	0	4.5	2	0	0	0	0.1	0	0.2	0.3	0	0	0	3.5	0	1.1	0.2	5
AgB01	1555999	1570588	AgB01_g099_t01	+	3641	17	letm1 and ef-hand domain-containing protein	SL		N	Y	N	25.4	63.5	33.6	16.8	25.5	31.6	34.8	35.9	21.9	21.8	26.5	20.4	24.3	28.4	21.4	19.1	18.2	18.5	21.4	23.6	15.2	16.1	24.7	23.1	32.1
AgB01	1555999	1570588	AgB01_g099_t02	+	4321	15	letm1 and ef-hand domain-containing protein	SL		N	N	Y	20.1	51.1	26.7	13.3	20.1	25.1	27.3	28.3	17.4	15.2	18.1	14.1	18.1	20.9	15	14.1	13.5	14.1	16.3	18.6	11.7	12.8	18.3	17	24.4
AgB01	1556603	1572680	AgB01_g099_t03	+	4068	18	letm1 and ef-hand domain-containing protein	SL		N	N	N	21.4	55.3	28.4	14.2	21.6	27	29.4	30.5	19.8	16.9	18.3	16	20.3	24	16	15.7	15.3	15.3	17.4	19.9	16.7	14.9	20	18.5	26.2
AgB01	1568611	1579500	AgB01_g100_t01	-	4583	6	LETM1 and EF-hand domain-containing protein 1			N	N	N	4.9	7.5	4	2.5	4.5	4.3	6.3	6.4	6	6.6	14	8.3	4.9	10.5	9.3	7.2	4.9	7.6	7.2	9.9	22.8	5.3	10	9.2	11.4
AgB01	1568611	1596481	AgB01_g100_t02	-	5192	11	LETM1 and EF-hand domain-containing protein 1	SL		N	N	N	4.4	6.6	3.7	0	4.9	5.2	8.1	8.2	6.1	6.1	13.6	8	5.1	11.7	9.3	7.6	4.9	7.4	6.8	9.8	26.4	5	9	8.2	10.5
AgB01	1568611	1599151	AgB01_g100_t03	-	7199	12	LETM1 and EF-hand domain-containing protein 1	SL		N	N	Y	1.8	3.5	1.8	1.7	2.1	2.9	4.7	4.8	3.9	3.1	7.3	4.8	3.2	7.4	4.8	4.9	2.5	4.3	3.6	5.8	19.5	2.9	5	4.4	5.6
AgB01	1568611	1601564	AgB01_g100_t04	-	5357	11	LETM1 and EF-hand domain-containing protein 1	SL		N	N	N	4.3	6.4	3.6	3.2	4.8	5.5	8.5	8.6	6.3	6.1	13.8	8.4	5.5	12.5	9.4	8.1	5	7.4	6.7	10.1	27.3	4.8	8.7	8	10.2
AgB01	1568611	1601564	AgB01_g100_t05	-	5352	11	LETM1 and EF-hand domain-containing protein 1	SL		N	N	N	4.3	6.4	3.6	3.2	4.8	5.5	8.5	8.6	6.3	6	13.7	8.2	5.4	12.5	9.3	8	5	7.3	6.7	10	26.6	4.8	8.7	8	10.2
AgB01	1568611	1601564	AgB01_g100_t06	-	5019	12	LETM1 and EF-hand domain-containing protein 1	SL		N	N	N	4.6	6.8	3.9	3.4	5.1	5.8	9	8.9	6.6	6.3	14	8.5	5.4	12.4	9.4	8	5.2	7.6	7	10.2	25.2	4.1	9.3	8.5	10.8
AgB01	1568611	1601564	AgB01_g100_t07	-	5587	12	LETM1 and EF-hand domain-containing protein 1	SL		N	N	N	1.9	3.1	1.9	2	2.6	4.2	6.6	6.6	4	4.6	10.8	6.1	4.1	9.3	7.1	5.9	3.1	5.4	4.7	7.2	22.4	2.8	6.1	5.4	7.1
AgB01	1585479	1601564	AgB01_g100_t08	-	1002	4	Suppressor APC domain-containing protein 2	SL		N	Y	N	0.2	0	0.4	1.7	1.4	7.7	12.2	11.2	2.3	2.1	8.8	5.9	6.1	13.9	5	5	3.3	2.7	1.4	4.9	18.6	1.7	0.8	0.2	1.3
AgB01	1575061	1580853	AgB01_g101_t01	+	4514	3	cre-nlp-2 protein			N	Y	Y	0	0	0.1	0.1	0.2	0.1	0.2	0.2	0.1	0	0	0.1	0.1	0.2	0.2	0.1	0	0.6	0.3	1.2	8.3	35.2	1.2	0	0.6
AgB01	1611593	1617325	AgB01_g102_t01	-	1226	7	Metal tolerance protein 7	SL		N	Y	Y	0	0	0	0	0.3	0	0	0	0	0	0	0	0	0	0.2	0.1	0	0	0	1.3	6.1	1.4	23.9	4.9	74.2
AgB01	1636187	1645524	AgB01_g103_t01	+	2523	5	FMRFamide-like neuropeptides	SL		N	Y	Y	0.7	0.2	0	0	0	0	0	0	3.6	3.9	0.1	0.3	0.2	0	0	0	0	0	0	0.3	15.4	54.8	0.4	0.2	0.1
AgB01	1644364	1651520	AgB01_g104_t01	-	817	4	RecName: Full=FMRFamide-like neuropeptides; Contains: RecName: Full=Neuropeptide AF10; AltName: Full=GFGDEMSMPGVLRF-amide; Contains: RecName: Full=Neuropeptide AF20; AltName: Full=GMPGVLRF-amide; Contains: RecName: Full=Neuropeptide AF3; AltName: Full=AVPGVLRF-amide; Contains: RecName: Full=Neuropeptide AF4; AltName: Full=GDVPGVLRF-amide; Contains: RecName: Full=Neuropeptide AF13; AltName: Full=S…	SL		N	N	Y	0.1	0.1	0	0	0	0	0	0	19.3	19.6	0.4	0.3	0.9	0	0	0	0	0	0	0.1	1.6	4.2	0.8	0	1.8
AgB01	1644364	1654109	AgB01_g104_t02	-	715	5	RecName: Full=FMRFamide-like neuropeptides; Contains: RecName: Full=Neuropeptide AF10; AltName: Full=GFGDEMSMPGVLRF-amide; Contains: RecName: Full=Neuropeptide AF20; AltName: Full=GMPGVLRF-amide; Contains: RecName: Full=Neuropeptide AF3; AltName: Full=AVPGVLRF-amide; Contains: RecName: Full=Neuropeptide AF4; AltName: Full=GDVPGVLRF-amide; Contains: RecName: Full=Neuropeptide AF13; AltName: Full=S…	SL		N	Y	N	0.1	0.1	0	0	0	0	0	0	22.5	28.5	0.8	0.4	1	0	0	0	0	0	0	0.1	1.8	4.8	1.7	0	2.9
AgB01	1649498	1662149	AgB01_g105_t01	+	2119	15	Poly(U)-specific endoribonuclease	SL		N	Y	Y	0	0	0	0	0.3	0	0	0	72.1	44.9	0.3	0.4	1.6	0	0	0.1	0	0	0.1	0.1	0.6	0	7.5	1.9	39.6
AgB01	1649530	1655368	AgB01_g105_t02	+	1270	4	Poly(U)-specific endoribonuclease	SL		N	N	N	0	0	0	0	0.2	0	0	0	22.2	27.1	0.2	0.2	0.9	0	0	0	0	0	0	0	0.3	0	2.8	0.7	17.5
AgB01	1649530	1662149	AgB01_g105_t03	+	2029	15	Poly(U)-specific endoribonuclease	SL		N	N	N	0	0	0	0	0.2	0	0	0	70.9	42.9	0.3	0.4	1.6	0	0	0.1	0	0	0.1	0.1	0.6	0	6.9	1.7	37.1
AgB01	1651740	1652090	AgB01_g105_t04	+	351	1	hypothetical protein			N	N	N	0	0	0	0	0	0	0	0	11.9	6.6	0	0.1	1.2	0	0	0	0	0	0	0	0	0	1	0.1	6.5
AgB01	1653254	1655368	AgB01_g105_t05	+	2115	1	Poly(U)-specific endoribonuclease	SL		N	N	N	0	0	0	0	0.1	0	0	0	7.3	7	0.1	0.2	0.4	0	0	0	0	0	0	0	0.1	0	0.8	0.1	4.8
AgB01	1655535	1656280	AgB01_g105_t06	+	746	1	Poly(U)-specific endoribonuclease			N	N	N	0	0	0	0	0	0	0	0	13.3	8.1	0.1	0.2	0	0	0	0	0	0	0	0	0.1	0	0.7	0.1	4.6
AgB01	1670097	1684496	AgB01_g106_t01	+	3229	8	Zinc finger protein ZIC 3	SL		N	N	N	0	0.1	0	0	0	0	0	0	0.1	0	0.2	0.2	0.1	0.3	0.1	0.1	0.2	6.9	34.6	12	10.9	3.7	0.3	0	0
AgB01	1671184	1684496	AgB01_g106_t02	+	3023	7	zinc finger protein zic 3			N	N	N	0	0.1	0	0	0	0	0	0	0.1	0	0.2	0.2	0.1	0.3	0.1	0.1	0.2	7.2	35.6	11.7	10.9	2.9	0.3	0	0
AgB01	1671184	1684496	AgB01_g106_t03	+	3936	7	Zinc finger protein ZIC 3			N	Y	Y	0	0.1	0	0	0	0	0	0	0.1	0	0.2	0.2	0.1	0.2	0.1	0.1	0.2	6.6	34.1	11.3	10.4	3.1	0.3	0	0
AgB01	1671184	1684496	AgB01_g106_t04	+	3164	8	Zinc finger protein ZIC 3			N	N	N	0	0.1	0	0	0	0	0	0	0.1	0	0.2	0.2	0.1	0.3	0.1	0.1	0.2	7.4	37.5	12.7	11.4	3.8	0.3	0	0
AgB01	1690752	1700191	AgB01_g107_t01	-	3511	9	hypothetical protein			N	N	N	4.7	27.8	2.7	0.2	0.4	0	0	0	0.1	0	0.1	0.1	0	0.2	0.2	0.1	0	0	2.2	0.4	0.7	0	0.1	0	0
AgB01	1690752	1700191	AgB01_g107_t02	-	3511	9	hypothetical protein			N	Y	N	4.7	27.8	2.7	0.2	0.4	0	0	0	0.1	0	0.1	0.1	0	0.2	0.2	0.1	0	0	2.2	0.4	0.7	0	0.1	0	0
AgB01	1690752	1700191	AgB01_g107_t03	-	3511	10	hypothetical protein			N	N	N	4.7	27.8	2.7	0.2	0.4	0	0	0	0.1	0	0.1	0.1	0	0.2	0.2	0.1	0	0	2.2	0.4	0.7	0	0.1	0	0
AgB01	1690752	1701419	AgB01_g107_t04	-	3641	9	hypothetical protein			N	N	Y	4.6	26.8	2.6	0.2	0.3	0	0	0	0.1	0.6	1	0.8	0.6	0.7	0.4	0.2	0	0	2.1	0.4	0.6	0	0.1	0	0
AgB01	1690752	1701419	AgB01_g107_t05	-	3641	9	hypothetical protein			N	N	N	4.6	26.8	2.6	0.2	0.3	0	0	0	0.1	1.1	2.3	1.7	1.4	1.5	0.6	0.3	0	0	2.1	0.4	0.6	0	0.1	0	0
AgB01	1701254	1704567	AgB01_g108_t01	+	1202	3	Serine/threonine-protein kinase Nek7	SL		N	N	Y	0.1	0.5	0.5	0.1	0.1	22.1	23.5	22.5	9.6	13.2	29.3	19.7	23.2	29	5.5	3.3	0.4	0.1	0.1	0.1	0.3	0	0.4	0.3	0
AgB01	1701254	1704567	AgB01_g108_t02	+	769	4	Serine/threonine-protein kinase Nek7	SL		N	Y	N	0.1	0.8	0.8	0.2	0.2	33.5	35.9	34.9	15.1	32.5	68.9	45.2	42.9	55.7	12.1	6.8	0.6	0.2	0.2	0.2	0.4	0	0.8	0.6	0
AgB01	1705318	1711645	AgB01_g109_t01	+	2408	8	Serine/threonine-protein kinase Nek7			N	Y	Y	0.2	3.2	1	0.1	0.2	15.4	21.3	20.6	8.6	11.9	28	13.3	10.9	30.4	6.8	4	0.9	2.4	1.3	0.4	1.5	0.7	1.4	0.5	0.1
AgB01	1712068	1724728	AgB01_g110_t01	+	3773	10	Warthog protein 4		Telo	N	N	Y	46.2	28.2	69.4	175.1	47.6	60.6	72.1	65.7	66.3	64.8	11.4	6.6	6.8	2.9	4.9	10.2	21.3	15.8	9.2	6	14.9	19.2	29.2	20.7	56.2
AgB01	1712068	1724728	AgB01_g110_t02	+	3761	10	warthog protein 4		Telo	N	Y	N	46.3	28.3	69.6	175.7	47.8	60.8	72.4	65.9	66.5	65	11.5	6.6	6.9	2.9	4.9	10.2	21.3	15.7	9.2	6.1	14.8	19.3	29.3	20.7	56.3
AgB01	1720500	1721140	AgB01_g110_t03	+	641	1	warthog protein 4			N	N	N	0	0.4	0.1	0	0	0	0	0	0	0	0	0	0	0.1	0.1	0.3	0.5	2	1	0.5	5.3	0	0.4	0.1	0.3
AgB01	1722022	1724026	AgB01_g111_t01	-	1688	2	Warthog protein 4		Telo	N	N	N	207.2	121.4	318.7	808.4	218.7	277.7	330.8	303.5	289.1	207.9	36.7	23	22	10.3	15.5	31.9	87.9	43.6	27.7	17.4	33.3	90.1	132.6	95.5	255.6
AgB01	1722022	1727971	AgB01_g111_t02	-	2782	8	propionyl- carboxylase beta		Telo	N	N	Y	188.6	79.3	641.4	1574.9	364.3	537.3	424	427	391.4	239.7	29.4	25.1	21.2	13.3	21.1	43	77	52	32.6	18.6	36.8	140.4	153.5	117.8	305.5
AgB01	1722022	1727990	AgB01_g111_t03	-	2586	9	propionyl- carboxylase beta		Telo	N	Y	N	209	86.4	704.8	1738.9	401.7	590.2	469	470.9	428.4	267	32.5	27.9	23.5	14.8	23.5	47.9	85.5	57.9	36	20.6	40.6	158.4	169.2	130.5	336.2
AgB01	1728055	1728442	AgB01_g112_t01	.	388	1	Propionyl-CoA carboxylase beta chain			N	Y	Y	30.8	27.2	274.3	605.6	118.3	252.1	78.2	112.5	128.8	76.4	5.4	7	3	3	7	13.4	14.6	31.7	15.7	7.8	20.6	44.6	85.3	70.8	167.1
AgB01	1728676	1734022	AgB01_g113_t01	-	4011	3	Propionyl-CoA carboxylase beta chain	SL		N	Y	Y	12.5	5.3	58.8	146	30.5	49.7	23	26.6	40.7	96.1	11.7	11.2	7.4	4.9	9.4	13.5	21	13.9	9.9	4.7	10.7	42.2	27.5	24.7	76.1
AgB01	1746886	1753535	AgB01_g114_t01	+	1557	5	hypothetical protein	SL		N	Y	N	1.5	1.1	5.4	1.1	0.7	5.4	4.1	5.5	10.9	8.2	12.5	7.7	6.1	21.8	11.4	12.7	7.3	25	18.5	15.5	35.9	1.1	9.7	1.8	2.6
AgB01	1751985	1754660	AgB01_g114_t02	+	2676	1	hypothetical protein			N	N	Y	0.9	2.1	0.6	0.1	0.1	0.4	0.4	0.5	0.9	1	1.9	0.9	1.1	2.8	1.6	1.9	0.8	3	2.9	2.1	4.5	0	1.2	0.4	0.3
AgB01	1751985	1763210	AgB01_g115_t01	-	3573	7	hypothetical protein			N	N	Y	4.5	8.5	1.1	0.1	0.1	0.4	0.2	0.4	0.8	0.5	1.1	0.5	0.6	1.3	0.8	1	0.4	2.3	1.4	1.2	3	0	0.9	0.3	0.3
AgB01	1751985	1763519	AgB01_g115_t02	-	3280	8	hypothetical protein			N	N	N	5.1	10.4	1.6	0.1	0.2	0.8	0.6	0.9	1.6	1.4	2.7	1.2	1.5	3.6	2.1	2.6	1.1	4.9	3.9	3	7	0.5	1.9	0.6	0.5
AgB01	1754738	1763150	AgB01_g115_t03	-	1660	7	hypothetical protein			N	N	N	8.4	17.5	1.7	0.1	0.1	0	0	0	0.1	0	0.2	0.1	0	0.2	0	0.1	0	0	0.1	0	0	0	0	0	0
AgB01	1754738	1763150	AgB01_g115_t04	-	2220	7	hypothetical protein			N	N	N	8.3	16.5	1.5	0.1	0.3	0	0	0	0.1	0.1	0.1	0.1	0	0.2	0	0.1	0	0	0	0	0.1	0	0	0	0
AgB01	1754738	1763195	AgB01_g115_t05	-	1397	7	hypothetical protein			N	N	N	10.1	19.9	1.8	0.1	0.2	0	0	0	0	0	0	0.1	0	0.2	0	0.1	0	0	0	0	0	0	0	0	0
AgB01	1754738	1763519	AgB01_g115_t06	-	1987	8	hypothetical protein			N	Y	N	8.5	18.1	1.7	0.1	0.3	0	0	0	0.1	0.1	0.1	0.1	0	0.2	0.1	0.1	0	0	0	0	0.1	0	0	0	0
AgB01	1764993	1778654	AgB01_g116_t01	+	3976	11	m-phase mpp8	SL		N	N	N	6	1.6	2.4	0.7	1.7	3.7	5.6	6.8	7.7	15.4	72.4	73.7	128.3	59.6	65.8	64.8	89.3	65.1	67.9	45	20.7	18.7	4.9	2.5	4.5
AgB01	1764993	1778654	AgB01_g116_t02	+	3466	12	m-phase mpp8	SL		N	N	N	6.6	1.9	2.7	0	1.9	4.2	6.4	7.8	8.8	17.7	84.3	85.3	147.5	69.2	76.6	76.4	105	75.7	78.6	52.1	24.1	21.9	5.6	2.8	5.2
AgB01	1764993	1778654	AgB01_g116_t03	+	3988	11	m-phase mpp8	SL		N	N	Y	6	1.6	2.4	0.7	1.7	3.7	5.6	6.8	7.7	15.5	73.4	74.4	128.8	60.4	66.9	66.6	91.9	66.1	69.1	45.7	21.1	19.1	4.8	2.5	4.5
AgB01	1765015	1778654	AgB01_g116_t04	+	3960	11	m-phase mpp8	SL		N	N	N	6	1.6	2.4	0.7	1.7	3.7	5.6	6.8	7.8	15.6	74	75.2	130.3	60.5	66.9	66.2	90.6	66.3	69.1	45.8	21.1	18.8	4.9	2.5	4.5
AgB01	1765015	1778654	AgB01_g116_t05	+	3438	12	m-phase mpp8	SL		N	N	N	6.7	1.9	2.7	0.8	1.9	4.2	6.5	7.9	8.8	17.8	83.4	84.7	146.9	69	76.2	75.8	104.7	75.3	78	51.8	23.9	22.1	5.6	2.8	5.3
AgB01	1765015	1778654	AgB01_g116_t06	+	3432	12	m-phase mpp8	SL		N	N	N	6.7	1.9	2.7	0.8	1.9	4.2	6.5	7.9	8.8	17.8	83.6	85.1	147.8	68.8	75.7	74.9	102.6	75.1	77.7	51.6	23.7	21.7	5.6	2.8	5.2
AgB01	1765015	1778654	AgB01_g116_t07	+	3438	12	m-phase mpp8	SL		N	Y	N	6.7	1.9	2.7	0.8	1.9	4.2	6.5	7.9	8.8	17.9	85	86.3	149.3	69.5	76.6	76	103.5	76	78.7	52.2	24	21.6	5.7	2.9	5.2
AgB01	1765158	1775298	AgB01_g116_t08	+	1296	11	m-phase mpp8	SL		N	N	N	14.7	3.6	6.9	2.1	4.3	10.6	16.2	19.5	19.2	36.2	163.9	194.5	380.4	141.2	135.5	157.7	246.3	123.2	129.2	94.8	38.4	33.3	8.4	4.6	9.6
AgB01	1787264	1787647	AgB01_g117_t01	.	384	1	putative elongation factor 1-beta 1-delta 2			N	Y	Y	0.3	0	0.5	0	0	0	0.3	0	0	0	0.3	0.1	0	0.3	0.3	0.9	0.9	0.2	0.2	0.1	0.1	0	0	0.1	0.1
AgB01	1833763	1851155	AgB01_g118_t01	+	2613	7	Gonadotropin-releasing hormone receptor			N	N	Y	0	0	0.4	3.8	1.9	0	0	0.1	0	0	0	0.2	0	0.2	0.9	3.4	2.1	1.5	0.2	0.2	0.7	0	4.5	20	0
AgB01	1833763	1857291	AgB01_g118_t02	+	1553	8	Gonadotropin-releasing hormone receptor			N	N	N	0	0	0.7	8.3	4.3	0.1	0.1	0.1	0	0.1	0	0.1	0	0	1	4.9	2.2	2	0.1	0.2	1.3	1.1	4.1	22.1	0
AgB01	1833833	1851155	AgB01_g118_t03	+	2544	7	Gonadotropin-releasing hormone receptor			N	Y	N	0	0	0.4	3.9	1.9	0	0	0.1	0	0.1	0	0.2	0	0.2	1	3.4	2.1	1.5	0.2	0.2	0.7	0	4.5	20.1	0
AgB01	1858914	1860690	AgB01_g119_t01	-	680	3	serotonin receptor			N	Y	Y	0	0	0	0	0	0	0	0	0	0	0.1	0	0	0.2	0.1	0.1	0	0	0	0	0.7	0	0	0.3	0
AgB01	1865213	1867030	AgB01_g120_t01	-	1319	3	Alpha-2A adrenergic receptor			N	Y	Y	0	0	0	0	0	0	0	0	0.4	0.2	0.1	0.2	0	0.1	1.6	2.1	1	0	0	0	0.2	0	0	0.1	0
AgB01	1892883	1906941	AgB01_g121_t01	-	1711	8	hypothetical protein			N	N	N	0	0	0.1	0.4	0.1	0	0	0	0	0.3	0	0.1	0.1	0	0.4	0.7	1.5	0	0.1	0.2	2.9	31.3	0.7	2.5	0.1
AgB01	1892883	1909231	AgB01_g121_t02	-	1750	8	hypothetical protein			N	N	Y	0	0.1	0.1	0.4	0.2	0	0	0	0	0.3	0	0.1	0.1	0	0.4	0.7	1.5	0	0.1	0.2	2.8	31.6	0.6	2.5	0
AgB01	1898005	1906955	AgB01_g121_t03	-	1688	5	hypothetical protein			N	Y	N	0.1	0	0.1	0.4	0.5	0	0	0	0	0.2	0	0	0	0	0.3	0.8	1.6	0	0.1	0.2	2.9	36.9	0.7	2.8	0
AgB01	1941165	1942201	AgB01_g122_t01	+	603	2	hypothetical protein			N	Y	Y	5.2	0.6	1.7	0.9	1.7	38.4	33.4	27.6	1.1	2.4	1.8	4.6	4.6	4.1	6.9	8.5	8.3	3	4.5	8.1	6.8	8.6	0.7	1.6	4.1
AgB01	1942958	1954360	AgB01_g123_t01	+	2771	12	nuclear hormone receptor family member nhr-136	SL		N	N	N	1	0.7	7	3.5	9.8	1	1.1	1	2.4	1.9	1	1.2	1.2	1.4	1.1	1.2	1.2	0.5	0.2	0.1	0.5	0	3.8	1.3	0.1
AgB01	1942958	1954360	AgB01_g123_t02	+	2536	10	nuclear hormone receptor family member nhr-136	SL		N	N	N	0.9	0.5	6.4	3.3	9.2	1	1	0.9	2.4	1.6	0.8	0.7	0.8	1	0.7	0.8	0.7	0.4	0.2	0.1	0.4	0	3.2	1.1	0.1
AgB01	1942958	1954360	AgB01_g123_t03	+	3135	9	nuclear hormone receptor family member nhr-136	SL		N	N	N	0.7	0.4	5.1	2.8	7.9	0.8	0.8	0.7	2.1	1.4	0.7	0.6	0.7	0.9	0.6	0.7	0.7	0.4	0.2	0.1	0.4	0	2.7	0.9	0.1
AgB01	1942958	1954360	AgB01_g123_t04	+	3256	10	nuclear hormone receptor family member nhr-136	SL		N	N	N	0.6	0.6	5.7	2.8	7.7	0.9	0.9	0.8	2.1	1.8	0.9	1.1	1	1.2	0.8	0.9	1	0.4	0.1	0.1	0.3	0	3.2	1.1	0
AgB01	1942958	1954360	AgB01_g123_t05	+	2667	11	nuclear hormone receptor family member nhr-136	SL		N	N	N	0.8	0.6	6.2	3.3	8	0.7	0.8	0.9	2.4	2	0.9	1.3	1.1	1.2	1.1	1	0.9	0.5	0.2	0.1	0.3	0	3.7	1.3	0.1
AgB01	1942958	1972059	AgB01_g123_t06	+	3086	9	nuclear hormone receptor family member nhr-136	SL		N	N	N	0.6	0.5	4.7	2.6	6.7	0.7	1.2	1.1	2.9	3.4	7.6	2.9	3.1	4.5	5.8	3.6	1.6	1	0.5	1.2	1.3	5	4.3	2.6	2.8
AgB01	1942985	1954360	AgB01_g123_t07	+	2761	12	nuclear hormone receptor family member nhr-136	SL		N	N	N	0.8	0.7	6.5	3.5	9.2	1	0.9	0.9	2.6	2	1	1.2	1.2	1.4	1.2	1	1.1	0.5	0.2	0.1	0.4	0	3.8	1.4	0.1
AgB01	1942985	1954360	AgB01_g123_t08	+	2526	10	nuclear hormone receptor family member nhr-136	SL		N	N	N	0.7	0.6	6.4	3	7.4	0.7	0.8	0.7	2.4	1.9	1	1.3	1	1.4	1.1	1	1.1	0.5	0.2	0.1	0.4	0	3.9	1.2	0.1
AgB01	1942985	1954360	AgB01_g123_t09	+	2748	12	nuclear hormone receptor family member nhr-136	SL		N	N	N	0.8	0.6	6.5	3.5	8.9	0.8	1	1	2.5	1.9	1.1	1.3	1.2	1.4	1.1	1.1	1.1	0.5	0.2	0.1	0.4	0	3.7	1.4	0
AgB01	1942985	1954360	AgB01_g123_t10	+	2741	12	nuclear hormone receptor family member nhr-136	SL		N	N	N	0.8	0.6	6.6	3.1	9.6	1	0.9	0.9	2.7	2.1	1	1.3	1.2	1.4	1	1	1.1	0.4	0.2	0.2	0.4	0	3.7	1.3	0
AgB01	1942985	1954360	AgB01_g123_t11	+	2737	12	nuclear hormone receptor family member nhr-136	SL		N	N	N	0.9	0.6	6.8	3.3	9.6	1	0.8	0.9	2.6	2.1	1	1.2	1.1	1.4	1.1	1.1	1.1	0.4	0.2	0.1	0.4	0	3.9	1.3	0.1
AgB01	1942985	1954360	AgB01_g123_t12	+	2694	11	nuclear hormone receptor family member nhr-136	SL		N	N	N	0.7	0.7	7.2	3.3	9.5	0.9	0.9	1	2.5	2.1	1.1	1.2	1.1	1.4	1	1.1	1.2	0.5	0.2	0.1	0.4	0	3.8	1.3	0
AgB01	1942985	1972059	AgB01_g123_t13	+	3201	11	nuclear hormone receptor family member nhr-136	SL		N	N	N	0.7	0.6	5.2	2.8	6.1	0.6	1.1	1.2	3	3.7	7.5	3.3	3.4	4.7	6	3.6	1.8	1.1	0.5	1.2	1.3	4.9	4.8	2.7	2.7
AgB01	1942985	1972059	AgB01_g123_t14	+	3154	11	Nuclear hormone receptor family member nhr-136	SL		N	N	N	0.9	0.6	6	3.3	7.4	0.8	1.1	1.3	3.3	4	7.7	3.5	3.5	4.9	6.2	3.7	2	1.2	0.6	1.2	1.3	4.9	5.2	2.8	2.7
AgB01	1942985	1972059	AgB01_g123_t15	+	3231	11	nuclear hormone receptor family member nhr-136	SL		N	N	N	0.7	0.7	6.6	3.3	8.5	0.9	1.3	1.4	3.4	4	7.6	3.4	3.4	4.8	6	3.8	2	1.1	0.6	1.2	1.3	4.8	5.2	2.8	2.6
AgB01	1942985	1972059	AgB01_g123_t16	+	3345	12	nuclear hormone receptor family member nhr-136	SL		N	N	Y	0.9	0.6	6.6	3.5	8.9	1	1.3	1.4	3.5	3.9	7.3	3.3	3.4	4.7	5.9	3.7	2	1.1	0.6	1.1	1.3	4.7	5.2	2.8	2.6
AgB01	1943125	1954360	AgB01_g123_t17	+	2408	10	nuclear hormone receptor family member nhr-136	SL		N	N	N	1	0.7	8	4.1	11.1	1.1	1.2	1.1	2.7	2	0.9	0.8	1	1.3	0.9	1	1	0.5	0.3	0.1	0.5	0	4	1.4	0.1
AgB01	1943181	1954360	AgB01_g123_t18	+	2588	12	nuclear hormone receptor family member nhr-136	SL		N	N	N	0.9	0.8	8.7	0	12	1.1	1.2	1.2	3.4	2.5	1.2	1.4	1.4	1.7	1.3	1.3	1.3	0.6	0.3	0.2	0.5	0	4.7	1.6	0.1
AgB01	1945281	1972059	AgB01_g123_t19	+	2850	10	nuclear hormone receptor family member nhr-136	SL		N	N	N	0.8	0.6	6.4	3.8	9.6	0.9	1.4	1.4	3.8	4.1	8.3	3.3	3.7	5.1	6.5	3.9	1.8	1.2	0.7	1.3	1.5	5.5	5.4	3.1	3
AgB01	1965651	1968899	AgB01_g123_t20	+	816	5	nuclear hormone receptor family member nhr-136			N	Y	N	0.6	0.8	9.9	22.4	17.1	4.1	12.7	12.5	9.9	8.2	13.6	11.8	13.2	21.5	12.9	12	6.4	1.7	1.5	4.1	4.8	2.1	5.7	5.1	10.7
AgB01	1965651	1972059	AgB01_g123_t21	+	2609	7	Nuclear hormone receptor family member nhr-136			N	N	N	0.3	0.4	3.9	8.9	7	1.9	5.2	5	5.8	5.8	13.1	7.2	7.7	12.3	10.8	7.9	3.3	1.8	0.9	2.7	3.1	8	5.3	4.4	6.9
AgB01	1965651	1972059	AgB01_g123_t22	+	2533	6	nuclear hormone receptor family member nhr-136			N	N	N	0.3	0.4	3.6	8.2	6.3	1.6	4.7	4.7	5.1	5.7	12.9	6.9	7.5	11.6	10.5	7.5	3.3	1.6	0.9	2.7	3	6.8	5.2	4.2	6.9
AgB01	1965651	1972059	AgB01_g123_t23	+	2668	7	Nuclear hormone receptor family member nhr-136			N	N	N	0.3	0.4	3.7	8.2	6.8	1.7	4.8	4.8	5.6	5.6	12.5	6.8	7.4	11.6	10.2	7.6	3.2	1.7	0.9	2.7	2.9	7.1	5.1	4.3	6.7
AgB01	1957659	1962884	AgB01_g124_t01	+	2159	4	Nuclear hormone receptor family member nhr-136	SL		N	Y	N	0.4	0.4	4.1	10.7	5.3	1.2	5.1	4.8	5.2	4.1	4.1	2.1	2.7	4.6	4.4	3.5	1.6	1.1	0.3	1.2	1.6	0	2.2	1.8	4.8
AgB01	1957659	1962884	AgB01_g124_t02	+	2165	4	Nuclear hormone receptor family member nhr-136	SL		N	N	Y	0.4	0.4	4.1	10.7	5.3	1.2	5.1	4.7	5.1	4.1	4.1	2.1	2.7	4.7	4.4	3.5	1.6	1.1	0.3	1.2	1.6	0	2.2	1.8	4.7
AgB01	1958567	1962884	AgB01_g124_t03	+	1804	4	Nuclear hormone receptor family member nhr-136	SL		N	N	N	0.5	0.5	4.3	10.8	5.5	1.3	5.9	5.6	5	3.3	4.7	2.1	2.9	5.2	4.6	4	1.7	1.1	0.3	1.3	1.7	0	2.3	1.8	3.3
AgB01	1980630	2001563	AgB01_g125_t01	+	4079	10	Nuclear hormone receptor family member nhr-136	SL		N	Y	N	4.7	4.4	2.2	0.9	1.8	3.7	3.6	3.8	3.1	3	8.2	6.8	4.7	7.7	4.7	2.2	0.9	0.2	0.2	0.6	1.4	0	1.9	0.7	1.1
AgB01	1980630	2001563	AgB01_g125_t02	+	4555	9	Nuclear hormone receptor family member nhr-154	SL		N	N	Y	3.8	3.1	1.7	0.6	1.5	3.3	3	3.2	2.6	2.7	7.4	6.1	4.2	6.8	4.2	2	0.8	0.2	0.2	0.5	1.4	0	1.7	0.6	1
AgB01	1981840	1996892	AgB01_g125_t03	+	1197	7	nuclear hormone receptor family member nhr-136	SL		N	N	N	6.9	1.5	2.1	0.8	2.5	7	6.8	7	7.4	2.7	4.5	5.6	4.4	12.8	5.3	3.2	1.2	0.3	0.2	0.7	2.1	0	1.1	1.1	1.7
AgB01	1981840	2001563	AgB01_g125_t04	+	2869	10	Nuclear hormone receptor family member nhr-136	SL		N	N	N	4.4	0.9	1.3	0.6	1.9	4.3	4.1	4.2	4	4.2	11.6	9.6	6.6	10.7	6.7	3.1	1.2	0.3	0.2	0.8	2	0	2.7	1	1.5
AgB01	1981840	2001563	AgB01_g125_t05	+	2869	10	Nuclear hormone receptor family member nhr-136	SL		N	N	N	4.4	0.9	1.3	0.6	1.9	4.3	4.1	4.2	4.1	4.2	11.6	9.6	6.6	10.7	6.6	3.1	1.2	0.3	0.2	0.8	2	0	2.7	1	1.5
AgB01	1981840	2001563	AgB01_g125_t06	+	2869	10	Nuclear hormone receptor family member nhr-136	SL		N	N	N	4.4	0.9	1.3	0.6	1.9	4.3	4.1	4.2	4.1	4.2	11.6	9.6	6.6	10.7	6.6	3.1	1.2	0.3	0.2	0.8	2	0	2.7	1	1.5
AgB01	1982277	2001563	AgB01_g125_t07	+	2683	10	Nuclear hormone receptor family member nhr-136			N	N	N	4.6	0.9	1.2	0	1.7	4.5	4.3	4.4	4.1	4.2	11.9	9.6	6.8	10.3	6.6	3.1	1.3	0.3	0.3	0.8	2.2	0	2.8	1	1.4
AgB01	1982277	2001563	AgB01_g125_t08	+	3126	9	Nuclear hormone receptor family member nhr-154			N	N	N	3.9	0.8	1.1	0.6	1.6	3.9	3.7	3.8	3.5	3.6	10.2	8.3	5.8	8.8	5.7	2.6	1.1	0.3	0.2	0.7	2	0	2.4	0.9	1.3
AgB01	1982277	2001563	AgB01_g125_t09	+	2650	10	Nuclear hormone receptor family member nhr-136			N	N	N	4.7	0.9	1.3	0.7	1.7	4.6	4.4	4.5	4.1	4.2	12	9.7	6.8	10.5	6.7	3.2	1.3	0.3	0.3	0.8	2.2	0	2.8	1	1.5
AgB01	1982277	2001563	AgB01_g125_t10	+	2650	10	Nuclear hormone receptor family member nhr-136			N	N	N	4.7	0.9	1.3	0.7	1.7	4.6	4.4	4.5	4.2	4.2	12	9.7	6.8	10.5	6.7	3.2	1.3	0.3	0.3	0.8	2.2	0	2.8	1	1.5
AgB01	1982320	2001563	AgB01_g125_t11	+	2607	10	Nuclear hormone receptor family member nhr-136			N	N	N	4.8	0.9	1.3	0.7	1.8	4.7	4.5	4.5	4.1	4.3	12.2	9.9	7	10.7	6.8	3.2	1.3	0.3	0.3	0.8	2.2	0	2.9	1	1.5
AgB01	2005245	2007537	AgB01_g126_t01	+	453	4	Trans-2-enoyl-CoA reductase 2	SL		N	Y	Y	6	4	0.7	0.2	2.6	27.7	29.5	34.3	13.9	23	124.1	139.1	89	151.5	106.1	77.3	34.9	11	2.2	1.4	3	0	144	210.5	0.4
AgB01	2009000	2015575	AgB01_g127_t01	+	2646	7	cuticle collagen 6			N	Y	Y	0.3	1.4	0.5	0	0.3	0	0	0	0.1	0	0.1	0	0	0	0.1	0.1	0.1	0	0	0.2	2	0.7	0.7	0	0
AgB01	2009018	2015575	AgB01_g127_t02	+	2510	6	cuticle collagen 6			N	N	N	0.3	1.4	0.5	0	0.3	0	0	0	0.1	0	0.1	0	0	0	0.1	0.1	0.1	0	0	0.2	2	0.7	0.7	0	0
AgB01	2010182	2010792	AgB01_g127_t03	+	611	1	Cuticle collagen 6, partial			N	N	N	0.6	1.9	0	0	0.3	0	0	0	0	0	0	0	0	0	0	0.2	0	0	0	0.1	2.6	0	0.6	0	0
AgB01	2018122	2019960	AgB01_g128_t01	+	801	2	hypothetical protein			N	N	Y	41.4	30.3	3.2	0	1.7	0	0	0	0	0	0	0	0	0	0	0	0	0	0	0	0	0	0.1	0	0
AgB01	2018584	2019960	AgB01_g128_t02	+	335	2	hypothetical protein			N	Y	N	92	62.9	6.8	0.1	3.3	0	0.1	0	0	0	0	0	0	0	0	0	0	0	0	0	0	0	0.2	0	0
AgB01	2023365	2027144	AgB01_g129_t01	+	392	4	hypothetical protein			N	Y	Y	0	0	0	0	0	0	0	0	0	0	0.1	0	0	0.1	0.1	0.1	0	0	0	0.1	8.8	8.8	0.1	0	0
AgB01	2029599	2046212	AgB01_g130_t01	-	3696	13	neuroligin-1			N	N	N	0.2	0.3	0.2	0.2	0.5	0.5	5.9	5.7	4.5	1.2	2.8	2.6	2.9	3.8	0.9	0.6	0.1	1.2	0.5	0.1	5.9	18.2	3.8	8.8	0
AgB01	2029599	2046213	AgB01_g130_t02	-	3880	14	neuroligin-1			N	N	Y	0.2	0.3	0.2	0.2	0.6	0.5	6.1	5.8	4.5	1.5	3.5	3.1	3.3	4.3	1	0.7	0.1	1.4	0.6	0.1	6.4	19.2	3.8	8.6	0
AgB01	2029599	2046213	AgB01_g130_t03	-	3685	13	neuroligin-1			N	N	N	0.2	0.2	0.2	0.2	0.5	0.5	5.7	5.7	4.4	1.2	2.8	2.6	2.9	3.8	0.9	0.6	0.1	1.2	0.5	0.1	5.9	17.8	3.8	8.8	0
AgB01	2029599	2046213	AgB01_g130_t04	-	3868	14	neuroligin-1			N	Y	N	0.2	0.2	0.2	0.2	0.6	0.5	5.9	5.7	4.5	1.5	3.5	3.1	3.3	4.3	1	0.7	0.1	1.4	0.6	0.1	6.3	18.8	3.8	8.6	0
AgB01	2046059	2047410	AgB01_g131_t01	+	281	2	Neuroligin-1, partial			N	Y	Y	0.3	0.2	0.2	0.8	0.3	0.6	6.5	4.9	5.9	2	1.1	0.7	1.3	2.3	1.4	0.1	0	1.6	1.1	0	5.4	18.5	3.5	10	0
AgB01	2048874	2053920	AgB01_g132_t01	-	830	5	Neuroligin-1, partial	SL		N	Y	Y	0	0.1	0.1	0.7	0.3	0.9	4.4	4.7	2.3	1	4.9	5.7	3.4	6.9	1.9	1.4	0.7	1.9	1	0.3	10.6	25	5.4	12.2	0.1
AgB01	2080450	2083857	AgB01_g133_t01	+	1579	4	hypothetical protein			N	Y	N	0.5	1.7	0.2	0	17.9	0	0.1	0.1	0	0	0	0	0	0	0.1	0	0	0	0	0	0	28.5	34.4	57.1	0
AgB01	2080739	2083857	AgB01_g133_t02	+	1957	3	hypothetical protein			N	N	Y	0.4	1.5	0.2	0	14.4	0	0	0	0	0	0	0	0	0	0.1	0	0	0	0	0	0	23	27.8	46.1	0
AgB01	2091670	2092597	AgB01_g134_t01	+	928	1	hypothetical protein			N	N	N	200.2	748.7	577.5	4.1	90.5	0.7	0.4	0.2	0.6	6.7	0.3	0.5	0	0.2	0.5	0.3	0.2	0	0.1	0.1	3.8	0	11.3	0.8	14.9
AgB01	2092106	2094216	AgB01_g134_t02	+	576	3	hypothetical protein		Telo	N	Y	N	2040.2	8756.6	8851	64.9	897.9	6	5.4	1.5	6.5	17.5	0.4	1.5	4.6	1.3	0.5	1	2.7	0.1	0.1	0.4	22.3	0	57.2	2.7	98.3
AgB01	2092858	2100286	AgB01_g134_t03	+	1194	3	hypothetical protein		Telo	N	N	N	1752.9	7907	8374	60.7	827.3	5.5	5	1.4	5.8	12	0.5	0.8	3.8	1.1	0.8	1.2	2.7	0.2	0.1	0.2	17.9	0	50.1	2.2	87
AgB01	2092858	2111237	AgB01_g134_t04	+	17586	2	hypothetical protein		Telo	N	N	Y	172	701	634.3	4.8	71.7	0.4	0.5	0.2	0.7	1.3	0.3	0.4	0.8	0.6	0.6	0.5	0.5	0.1	0.1	0.2	3.3	0.3	5.5	0.2	7.5
AgB01	2093775	2111237	AgB01_g134_t05	+	11363	6	hypothetical protein		Telo	N	N	N	115.9	484.5	388.7	3.1	46.9	0.3	0.4	0.2	0.5	1.2	0.4	0.4	0.8	0.7	0.7	0.6	0.6	0.2	0.2	0.2	2.4	0.3	4.5	0.2	6
AgB01	2092106	2095569	AgB01_g135_t01	-	577	4	hypothetical protein		Telo	N	N	N	2969	13273.4	14043.5	101.6	1420.9	9.7	8.8	2.4	9.8	29.8	0.8	1.7	3.8	1.6	0.9	2	3.7	0.6	0.4	0.4	32.7	0	98.9	4.4	159.5
AgB01	2092106	2095569	AgB01_g135_t02	-	600	3	hypothetical protein		Telo	N	Y	N	1976.4	8915.6	9170.6	65.7	933.5	6.3	5.7	1.8	6.1	16	0.6	1.2	4.1	0.9	0.7	1.6	2.5	0.6	0.2	0.1	19.1	0	63.5	2.8	98.3
AgB01	2092106	2100560	AgB01_g135_t03	-	790	3	hypothetical protein		Telo	N	N	Y	1290.5	5732.3	5814.1	39.3	575.1	3.8	2.9	1.1	4.3	15.6	0.4	1.1	2.1	0.5	0.5	1	1.5	0.5	0.2	0.2	14.6	0	46.8	1.7	68.6
AgB01	2128234	2128966	AgB01_g136_t01	+	733	1	Nuclear hormone receptor family member nhr-1			N	N	N	0	0	0.1	0.8	0.2	0.1	0	0	0.3	1.5	0.9	1.9	1	1.8	5.9	4.7	2.7	1.1	0.1	0.9	2	4.7	1.8	2.7	9.6
AgB01	2128235	2168472	AgB01_g136_t02	+	2638	9	nuclear hormone receptor family member nhr-1	SL		N	Y	N	0.6	0.2	1.1	3.1	2.3	0.2	0.6	0.5	2.8	2.4	3	2.7	2.8	4.7	8.1	6.6	6.4	1.8	0.7	2.1	3.6	4.6	5.8	4.6	13.9
AgB01	2139041	2168472	AgB01_g136_t03	+	2639	9	nuclear hormone receptor family member nhr-1	SL		N	N	Y	0.6	0.2	1.1	3.1	2.3	0.2	0.6	0.5	2.8	2.4	3	2.7	2.8	4.7	8.1	6.6	6.4	1.8	0.7	2.1	3.6	4.6	5.8	4.6	13.9
AgB01	2149079	2168472	AgB01_g136_t04	+	2327	7	nuclear hormone receptor family member nhr-1	SL		N	N	N	0.6	0.2	1.2	2.9	2.1	0.2	0.6	0.4	2.9	1.8	2.9	2.1	2.1	4.3	6.1	4.9	4.9	1.4	0.7	1.6	2.6	3.7	5.6	4.1	12.2
AgB01	2158645	2160333	AgB01_g136_t05	+	1689	1	Nuclear hormone receptor family member nhr-1	SL		N	N	N	1.3	0.2	0.3	0.8	0.4	0.4	0.3	0.5	0.7	0.7	2.6	2.3	5.2	3.3	2.4	1.7	2.3	0.5	0.5	0.6	0.5	3.1	1.8	1	2.7
AgB01	2165340	2170023	AgB01_g137_t01	-	987	4	hypothetical protein			N	Y	Y	0.3	0.4	0	0	0.4	0	0	0	0	0	0	0	0.3	0	0.2	0.1	0.2	0.1	0	0	0.1	0	0.4	0.1	2.1
AgB01	2172234	2177351	AgB01_g138_t01	-	2324	4	28s ribosomal protein	SL		N	Y	Y	5.4	1.3	2.8	0.7	2.6	3.7	2	2.3	2.5	2.8	7.7	8.6	7.4	13.2	17.7	24.8	18.5	19.1	12.7	8.5	8.5	4.5	6.3	2.8	2.6
AgB01	2177580	2187512	AgB01_g139_t01	-	3352	8	pre-mrna-processing factor 6	SL	Telo	N	N	Y	6.6	9.2	2.4	0.2	1.4	2.1	1.9	2.4	1.6	0.8	4.8	4.1	3.2	9.6	12.6	14.1	9.5	14.9	12	9.3	5.9	3.1	3.3	0.5	1.1
AgB01	2181844	2187507	AgB01_g139_t02	-	773	5	pre-mrna-processing factor 6		Telo	N	Y	N	14.4	21.9	6.5	0.5	3.4	6.2	5.5	7.1	2.1	1.4	9.5	10.8	10.3	26.4	26.1	35.6	24.1	30.4	25.2	21.3	12.4	6.7	5.6	0.7	1.7
AgB01	2180905	2197882	AgB01_g140_t01	-	585	4	pre-mrna-processing factor 6	SL	Telo	N	N	N	24	28.2	6.5	0	4.2	7	8.5	6.1	7	2.7	16.4	29.2	51.1	32.3	36.1	46.9	84.3	26.5	26.4	19.9	9.7	5.9	4.2	0.7	1.5
AgB01	2187586	2197845	AgB01_g140_t02	-	706	5	pre-mrna-processing factor 6	SL		N	N	N	27.5	32.5	9.5	1.4	5.2	8.6	10.6	7.3	6.6	2.4	14.9	26.8	52.5	33.2	36.1	49.9	81.3	31.7	29	22.4	11.9	4.9	6.5	0.9	2.7
AgB01	2187586	2197860	AgB01_g140_t03	-	1809	5	pre-mrna-processing factor 6	SL		N	N	N	14.7	16.2	4.4	0.9	3.4	3.9	4.4	3	2.7	1	6.9	12.3	23.2	15	15.3	21.1	33.7	13.4	12	9	5.2	1.9	3	1.6	1.9
AgB01	2187908	2197845	AgB01_g140_t04	-	1789	10	Pre-mRNA-processing factor 6	SL		N	N	N	23.9	29.4	8.3	0.9	4.5	8.1	7.9	7.3	5.9	2.2	11.2	18.2	28.2	27	28.2	41.2	57.1	31.6	27.6	23	12	5.8	5.6	0.9	2.7
AgB01	2187908	2197860	AgB01_g140_t05	-	2892	10	Pre-mRNA-processing factor 6	SL		N	Y	Y	13.8	17	4.7	0.6	2.9	4.6	4.5	4	3	1.4	6.9	10.9	17.1	15.8	16.1	24.3	29.7	18.5	15.9	13.6	7.1	3	3.1	0.8	1.6
AgB01	2190816	2197860	AgB01_g140_t06	-	2252	7	Pre-mRNA-processing factor 6	SL		N	N	N	16.2	18.1	5.3	0.9	3.4	4.7	4.7	3.7	3	1.3	7.8	13.9	24.3	18.9	18.8	25.7	39.6	18.7	16.1	12.5	6.8	3.8	3.6	1.3	2.1
AgB01	2195084	2198893	AgB01_g141_t01	.	3810	1	pre-mrna-processing factor 6	SL		N	Y	Y	4.1	3.8	0.8	0.2	1.1	0.8	0.5	0.6	0.5	0.1	1.3	2.9	2.4	3.7	2.8	2.3	5.5	1.4	1.4	1.1	0.6	0.5	0.4	0.3	0.2
AgB01	2204447	2231595	AgB01_g142_t01	+	3548	15	guanylate cyclase receptor-type gcy-1		Telo	N	N	Y	0.4	0.2	4.4	0	0.2	0.1	0	0	0.3	0.4	0.4	0.4	0.2	0.5	1.4	0.8	0.8	0.7	1	1.6	4.9	0	0.2	0	0
AgB01	2205867	2231595	AgB01_g142_t02	+	2519	14	guanylate cyclase receptor-type gcy-1		Telo	N	N	N	0.5	0.2	5.5	0.1	0.2	0.1	0	0	0.4	0.5	0.5	0.5	0.5	0.6	1.9	1	0.8	0.9	1.2	2.1	5.9	0	0.3	0	0.1
AgB01	2205867	2231595	AgB01_g142_t03	+	2694	15	guanylate cyclase receptor-type gcy-1		Telo	N	N	N	0.6	0.3	6	0.1	0.2	0.1	0	0	0.4	0.6	0.5	0.4	0.5	0.6	1.8	1.1	1	0.9	1.3	2.1	6	0	0.3	0	0
AgB01	2205948	2229778	AgB01_g142_t04	+	1453	13	guanylate cyclase receptor-type gcy-1		Telo	N	Y	N	0.6	0.4	8.7	0.1	0.4	0.1	0	0	0.7	0.4	0.2	0.2	0.4	0.6	2	1.5	0.6	0.5	0.8	1.5	5.8	0	0.1	0	0
AgB01	2217463	2231595	AgB01_g142_t05	+	2669	12	guanylate cyclase receptor-type gcy-1			N	N	N	0.5	0.2	5.4	0.1	0.2	0.1	0	0	0.3	0.4	0.5	0.5	0.4	0.6	2	1	0.8	0.8	1.1	2.1	6.2	0	0.3	0	0
AgB01	2217748	2223679	AgB01_g142_t06	+	372	3	Guanylate cyclase receptor-type gcy-1			N	N	N	0	0.2	7.4	0	0.3	0	0	0	1.2	0	0.1	0	0	0.6	4.9	1.6	0	0.2	1.3	1.6	9	0	0.1	0	0
AgB01	2219146	2220991	AgB01_g142_t07	+	654	3	guanylate cyclase receptor-type gcy-1			N	N	N	0.8	0.2	9.5	0.1	0.6	0.1	0	0	0.8	0.2	0.2	0.4	0	0.3	4	2.5	0.8	0.6	1.4	1.8	6.9	0	0.1	0	0
AgB01	2224198	2231595	AgB01_g142_t08	+	2971	7	guanylate cyclase receptor-type gcy-1			N	N	N	0.3	0.2	2.9	0	0	0	0	0	0.1	0.3	0.4	0.3	0.3	0.3	0.8	0.4	0.7	0.7	0.9	1.8	4.5	0	0.2	0	0
AgB01	2224274	2231595	AgB01_g142_t09	+	2166	4	Guanylate cyclase 32E			N	N	N	0.4	0.1	2.1	0	0	0.1	0.1	0	0.1	0.4	0.5	0.5	0.4	0.4	1.1	0.5	0.9	1	1.4	2.2	5	0	0.4	0	0.1
AgB01	2224305	2231595	AgB01_g142_t10	+	1351	5	guanylate cyclase receptor-type gcy-1			N	N	N	0.5	0.1	3.1	0	0	0	0.1	0	0.1	0.7	0.9	0.7	0.6	0.5	1.6	0.7	1.4	1.2	1.8	3	6.9	0	0.5	0	0.1
AgB01	2209246	2209605	AgB01_g143_t01	.	360	1	hypothetical protein			N	Y	Y	0	0	0	0	0	0	0	0	0	0	0.4	0	0	1.3	1.4	1	0.2	0.3	0	0	0	0	0	0	0
AgB01	2235461	2245082	AgB01_g144_t01	-	2474	11	Cyclic AMP-dependent transcription factor ATF-6 alpha	SL		N	N	N	11	1.4	4.6	0.4	1.5	5.6	8.6	7.6	4.3	2.3	7	10.3	14.1	12.9	12	11.6	20.6	9.1	10.5	11.6	11.7	7	0.8	0.2	0.8
AgB01	2235461	2245082	AgB01_g144_t02	-	2483	11	Cyclic AMP-dependent transcription factor ATF-6 alpha	SL		N	N	N	11	1.4	4.6	0.4	1.5	5.7	8.6	7.6	4.4	2.3	6.9	10.3	14.1	13	12	11.6	20.8	9.1	10.5	11.4	11.7	7	0.8	0.2	0.8
AgB01	2235461	2248231	AgB01_g144_t03	-	3111	14	cyclic amp-dependent transcription factor atf-6 alpha	SL		N	N	N	14.4	1.8	6.3	0.5	2	7.6	11.5	10.1	5.4	2.1	6.4	9.1	12.9	12.5	11.7	11.8	20	9.8	11.4	12.7	12.6	6.1	0.8	0.2	0.9
AgB01	2235461	2248239	AgB01_g144_t04	-	3128	14	cyclic amp-dependent transcription factor atf-6 alpha	SL		N	N	Y	14.3	1.8	6.3	0.5	1.9	7.5	11.5	10	5.4	2.1	6.4	9	12.8	12.6	11.6	11.8	20	9.8	11.4	12.6	12.5	6.1	0.8	0.2	0.9
AgB01	2245150	2248239	AgB01_g144_t05	-	1008	4	cyclic amp-dependent transcription factor atf-6 alpha	SL		N	Y	N	18	2.3	8.5	0.7	2.7	10	14.9	12.8	6.3	0.8	3.2	3.7	6	7.3	7	8.4	11.6	8.6	10.1	11.3	11.1	1.7	0.7	0.2	0.8
AgB01	2249171	2251319	AgB01_g145_t01	+	1541	2	hypothetical protein			N	N	N	0.1	0.1	0	0.2	0	0.2	0.1	0	0	0.7	2.1	1.9	1.2	2.4	1.5	0.8	0.3	0.8	0.8	1	0.9	1.1	0.6	0.5	0.3
AgB01	2249297	2260258	AgB01_g145_t02	+	2104	5	Cytochrome b5	SL		N	Y	Y	1.8	0.9	2.2	0.9	1.7	1.8	3	2.7	9.5	9.2	26.1	29.7	37.2	30.6	40.3	60.3	64	73.4	47.3	22.7	78	21.4	31.6	21.8	52.2
AgB01	2249841	2251319	AgB01_g145_t03	+	1479	1	hypothetical protein			N	N	N	0.2	0.1	0	0.2	0	0.2	0.1	0	0.1	0.7	1.9	1.6	1.2	2.3	1.4	0.9	0.8	1	1.2	1.3	0.9	0	0.5	0.4	0.4
AgB01	2249897	2260258	AgB01_g145_t04	+	2012	5	Cytochrome b5	SL		N	N	N	2.1	1	2.4	1.1	1.8	1.9	3.2	2.8	10.1	9.6	27.1	30.7	38.9	31.7	42	63	67.4	76.8	49.5	23.7	81.4	21.5	33	23.4	56.6
AgB01	2261094	2265485	AgB01_g146_t01	-	1097	5	Golgi SNAP receptor complex member 2	SL		N	Y	N	7.3	1	0.3	0.4	1.6	8.2	7.3	8.1	1.9	2.4	17.6	12.7	9.5	29.1	25.3	23	10.5	11.1	7	6	7.6	0	5.1	2.2	1.3
AgB01	2261094	2265512	AgB01_g146_t02	-	1578	4	Golgi SNAP receptor complex member 2	SL		N	N	Y	6.3	0.7	0.2	0.3	1.2	6.5	6.2	7	1.5	1.9	13.4	9.2	7.7	22	19.7	18.6	8.2	9.5	5.8	4.9	6.6	1.1	4.2	1.8	1
AgB01	2268699	2278437	AgB01_g147_t01	-	2566	12	Pappalysin-1, partial			N	Y	Y	0.3	0.3	6.7	0	0.7	0	0	0	0.6	0.6	0	0.2	0	0.1	0.3	0.2	0.1	0.1	0.1	1.5	1.7	0.7	4.4	0.2	0
AgB01	2268699	2278449	AgB01_g147_t02	-	2510	13	Pappalysin-1, partial			N	N	N	0.4	0.4	10	0	0.9	0	0	0	0.7	0.9	0	0.3	0	0.2	0.4	0.3	0.1	0.1	0.1	2	2.4	0.7	5.7	0.3	0.1
AgB01	2268699	2278449	AgB01_g147_t03	-	2510	13	Pappalysin-1, partial			N	N	N	0.4	0.4	10	0	0.9	0	0	0	0.7	0.9	0	0.3	0	0.2	0.4	0.3	0.1	0.1	0.1	2	2.4	0.7	5.7	0.3	0.1
AgB01	2288921	2292892	AgB01_g148_t01	-	1478	8	hypothetical protein			N	Y	Y	1.5	0.5	0.1	0	2.9	2.3	1.3	1.2	1.3	1.3	1.5	1.9	3.3	3.2	2.7	2.4	1.5	0.1	0	0	7.1	1.2	0.2	0	0
AgB01	2302843	2304672	AgB01_g149_t01	+	675	3	Integrator complex subunit 2			N	Y	Y	3.6	1	1.6	1	1.7	9.7	8.5	9.1	2.1	0.4	2.8	1.9	5.2	5.5	1.6	3.6	1.9	4.1	3.3	3.4	2.4	0	0.8	0.4	0.5
AgB01	2306498	2313501	AgB01_g150_t01	+	2806	7	integrator complex subunit 2			N	Y	Y	9.1	1.7	2.7	2.2	3.2	13.8	12.3	13.2	5	2.7	21.6	12.4	11.6	26.4	14.5	14.3	9.5	16.1	15.8	12.9	8.5	3.1	4.7	1.9	2
AgB01	2307715	2313501	AgB01_g150_t02	+	2342	6	integrator complex subunit 2			N	N	N	8.4	1.5	2.7	2.3	3.4	12.9	11.1	11.9	4.7	2.7	23.9	13.4	12	27	15.2	14.8	9.6	16.6	16.4	13.6	9.1	3	4.9	2	2.1
AgB01	2315201	2338031	AgB01_g151_t01	+	4369	16	protein gtlf3b	SL		N	N	N	10.9	1.7	3.8	0	2.9	23.7	25.3	24.8	7.3	15.7	71.5	44.5	42.7	49.5	40.9	28.1	19.4	19.5	20.6	18.2	13.3	11.5	6	7.3	1.3
AgB01	2316159	2331498	AgB01_g151_t02	+	3321	16	protein gtlf3b	SL		N	N	N	12.8	1.4	3.5	1.5	3	28.7	23.5	25.1	8.6	13.8	48.5	47	44.6	62	49.6	37.7	23.1	28.3	28.8	26.3	20.5	14.6	6	3.4	1.9
AgB01	2316159	2331498	AgB01_g151_t03	+	4235	16	protein gtlf3b	SL		N	Y	N	10.2	1.1	2.8	1.2	2.4	22.8	18.7	19.9	7.1	11.7	42.9	39.8	38.3	53.8	49.5	34.1	21	27.9	27.7	25	19.8	13.1	5.7	3.1	1.8
AgB01	2316166	2316896	AgB01_g151_t04	+	731	1	hypothetical protein	SL		N	N	N	0.8	0.3	0.7	0	1	1.8	0.6	1.1	0.3	1.8	5.7	7.7	5.7	9.5	14.7	9.3	7.5	6.1	6.8	5.5	3.3	7.1	0.9	0.6	0.3
AgB01	2316206	2338031	AgB01_g151_t05	+	4421	16	protein gtlf3b	SL		N	N	N	10.8	1.7	3.8	1.3	2.9	23.4	25	24.6	7.2	15.6	70.6	44.2	42.2	48.7	40.2	27.8	19.1	19.4	20.5	18.1	13.2	11.3	5.9	7.2	1.3
AgB01	2325139	2325664	AgB01_g151_t06	+	526	1	hypothetical protein	SL		N	N	N	0.6	0	0.1	0.3	0	0.3	0.9	0.3	0	0.2	0.8	1.7	0.2	1.1	0.3	0.6	0.8	3.1	2.3	2.2	2.2	0	0.1	0	0.1
AgB01	2325139	2338031	AgB01_g151_t07	+	5068	10	protein gtlf3b	SL		N	N	Y	6	0.9	2.1	0.7	1.4	12.5	17.7	17.1	4.8	15.4	72.1	40.7	30.9	35.2	24.9	13.9	10.3	13.1	12.8	10.3	8.7	9.2	5.2	6.8	0.6
AgB01	2340591	2355374	AgB01_g152_t01	+	3623	9	TRPL translocation defect protein 14			N	Y	N	0.5	3.8	1.1	0	0.5	0.1	0.1	0.1	0.2	0.8	1.9	1.7	1.1	1.9	3.5	3.3	1.2	1.9	0.5	0.5	1.8	1.4	0.6	2.1	1.3
AgB01	2341894	2355374	AgB01_g152_t02	+	3841	9	TRPL translocation defect protein 14			N	N	Y	0.4	2.8	0.7	0	0.4	0.1	0.1	0.1	0.2	0.7	1.6	1.4	1.1	1.7	2.7	2.8	1.1	1.5	0.4	0.4	1.4	1.4	0.4	1.6	1.1
AgB01	2341894	2355374	AgB01_g152_t03	+	3805	9	TRPL translocation defect protein 14			N	N	N	0.5	4.2	1.4	0.1	0.5	0.1	0.1	0.1	0.3	0.9	2	1.7	1.3	2	3.5	3.5	1.3	1.9	0.6	0.6	1.9	1.8	0.7	2.2	1.4
AgB01	2351004	2352221	AgB01_g152_t04	+	1218	1	hypothetical protein			N	N	N	0.3	1.8	0.1	0	0.2	0.1	0	0	0	0.2	0.3	0.7	0.3	0.4	0.7	0.6	0.7	0.3	0.1	0.2	0.2	0	0.1	0.4	0.2
AgB01	2352279	2355330	AgB01_g153_t01	-	1954	2	hypothetical protein			N	N	Y	0.4	4.3	1.5	0.1	0.2	0	0	0	0.1	0.3	0.9	0.5	0.3	0.6	1.7	1.1	0.3	0.8	0.4	0.4	1.1	0.9	0.5	1.1	0.6
AgB01	2352279	2355374	AgB01_g153_t02	-	1154	3	TRPL translocation defect protein 14			N	Y	N	0.5	5	1.3	0.1	0.2	0	0.1	0.1	0.2	0.3	0.7	0.1	0.4	0.7	0.7	0.7	0.5	0.4	0.3	0.3	1	1.5	0.4	0.7	0.6
AgB01	2355791	2356340	AgB01_g154_t01	-	282	2	hypothetical protein			N	Y	Y	0.3	0.3	0	0	0	0	0	0	0	0	0	0.2	0	0.4	0	0	0	0	0	0	0.2	0	0.1	0.1	0
AgB01	2359960	2360253	AgB01_g155_t01	+	294	1	hypothetical protein			N	Y	Y	1.4	0.1	0.1	0	0.1	0.3	0	0	0	0	0	0	0	0	0	0	0	0	0	0	0	0	0	0.1	0
AgB01	2370212	2370517	AgB01_g156_t01	+	306	1	homeobox-containing protein 1			N	Y	Y	0.1	0	0	0	0	0.1	0	0	0	0	0	0	0	0	0	0	0	0	0	0	0	0	0	0	0.1
AgB01	2373766	2374084	AgB01_g157_t01	.	319	1	hypothetical protein			N	Y	Y	1.2	1.5	0.6	0.2	0	0.6	0.5	0.2	0.3	0	0	0	0	0.2	0.3	0.1	0.2	0.1	0.4	0.6	0.1	0	0.1	0.1	0.1
AgB01	2374412	2375483	AgB01_g158_t01	.	1072	1	hypothetical protein			N	Y	Y	2.3	3.6	0.7	0	0	0.4	0.5	0.3	0	0	0	0	0.6	0.3	0.5	0.3	0.3	0.3	0.3	0.4	0.3	1.6	0.5	0.1	0.3
AgB01	2377111	2382637	AgB01_g159_t01	+	3544	2	hypothetical protein			N	Y	Y	1.6	2.6	0.4	0	0.1	0.4	0.3	0.2	0.3	0.2	0.4	0.3	0.3	0.4	1.3	0.6	0.9	0.5	0.3	0.6	0.5	1	1	0.2	2.5
AgB01	2377111	2383724	AgB01_g159_t02	+	2132	3	Putative glycosyltransferase C06E1.7			N	N	N	4.8	7	1.8	0.1	0.3	1.1	1	0.9	0.6	0.4	0.8	0.5	0.7	1.4	2.1	1.3	2.4	1.6	1.2	1.4	1.5	2.4	1.7	0.5	4.2
AgB01	2389646	2394945	AgB01_g160_t01	-	789	4	Putative glycosyltransferase C06E1.7			N	Y	Y	2	0.6	0	0	0.1	0	0	0	0.6	0.1	0.4	0.1	0.1	0.4	0.2	0	0.1	0	0	0	0.6	2.2	2	0.4	10.1
AgB01	2401480	2417061	AgB01_g161_t01	+	3268	17	ATP-binding cassette sub-family F member 1	SL		N	Y	Y	23.4	9.3	9	6.6	11.1	8	6	5.9	7.1	8.7	16.6	17.2	34	15.8	22.6	21.8	19.5	13.4	12.3	10.4	6.5	8.5	14.5	11.6	15.7
AgB01	2417747	2422902	AgB01_g162_t01	+	1455	4	hypothetical protein	SL		N	Y	N	7.7	2.8	4	2.4	5.6	3.8	3.6	3.2	9.1	13.8	40	51.4	64.6	32.8	43	65.2	110	104	59.8	28.1	18.1	15.4	21.4	6.7	11.1
AgB01	2418578	2451912	AgB01_g162_t02	+	2893	9	hypothetical protein	SL		N	N	N	2.5	1	1.3	0.8	1.7	1.5	1.5	1.7	2.1	4.8	18	25.2	33.5	24	26.1	31.3	47.7	30.8	15.5	8.2	6.7	2.4	3.8	1.2	1.9
AgB01	2418660	2419032	AgB01_g162_t03	+	127	2	hypothetical protein			N	N	N	0.6	0.3	0	0	0	0	0	0	0	0	0.3	0.4	2.5	8.6	2	5	3.4	2.7	0.7	0.3	0	0	0	0	0
AgB01	2432256	2433766	AgB01_g162_t04	+	1511	1	hypothetical protein			N	N	N	0.3	0.2	0	0	0	0	0	0	0	0	0.1	0.3	0	0.5	2.4	1.6	1.2	0.6	0.4	0.4	1.1	0	0.2	0	0.1
AgB01	2432256	2451912	AgB01_g162_t05	+	1534	7	hypothetical protein			N	N	N	0.1	0.1	0	0	0	0.3	0.5	0.9	0.1	2.8	13.4	11	11.8	20.6	18.2	12.3	6.9	3.9	2.2	2.4	4.7	1.1	0.5	0.1	0.1
AgB01	2437288	2438757	AgB01_g162_t06	+	1470	1	hypothetical protein			N	N	N	0.3	0	0	0	0	0	0.1	0	0	0	0.2	0.1	0.3	0.5	1.3	1.4	0.9	1.2	0.9	1.5	2.3	1.2	0	0	0
AgB01	2438809	2441160	AgB01_g162_t07	+	2352	1	hypothetical protein			N	N	N	0.2	0.1	0	0	0	0	0.1	0	0	0	0.1	0.3	0.4	0.4	0.8	0.6	0.5	1.1	0.8	1.1	1.6	0	0	0	0
AgB01	2438809	2451912	AgB01_g162_t08	+	2994	3	hypothetical protein			N	N	Y	0.2	0.1	0	0	0	0.1	0.3	0.4	0.1	1.5	6.7	5.7	6.3	10.5	8.7	5.7	3	2.3	1.1	1.6	2.6	0	0.2	0	0
AgB01	2442257	2444247	AgB01_g162_t09	+	1991	1	hypothetical protein			N	N	N	0.1	0.3	0	0	0	0	0	0	0	0	0	0.1	0.4	0.3	1	0.5	0.7	1.2	0.9	1.4	2.1	0	0	0	0
AgB01	2445801	2451912	AgB01_g162_t10	+	973	2	hypothetical protein			N	N	N	0	0.1	0	0	0	0.4	0.7	1.5	0.2	4.6	20.6	16.6	17.9	31.1	23.8	15.2	7.8	4.3	1.6	2.4	4.1	0	0.5	0.1	0
AgB01	2423228	2425695	AgB01_g163_t01	.	2468	1	hypothetical protein			N	Y	Y	3.1	2.7	1.9	0.4	0.1	1.1	1.4	1.4	0.1	0.6	0.4	0.2	0.4	0.6	1.4	1.1	1.9	3.1	1.5	0.8	0.6	0.7	0.6	0.3	0.7
AgB01	2428473	2429050	AgB01_g164_t01	.	578	1	hypothetical protein			N	Y	Y	0.3	1.2	0.3	0	0	0	0	0	0	0	0	0	0	0.1	0.5	0.1	0.1	0.3	0.1	0.5	0.4	0	0	0	0
AgB01	2453835	2466459	AgB01_g165_t01	+	1424	11	transmembrane protein	SL		N	N	Y	4.3	1.3	1	0.1	0.4	7.7	14.3	14.3	5.9	7.4	45.8	36.6	22.1	38.1	17.2	9.9	2.8	0.7	0.3	0.7	0.9	0	3.3	1.5	24.1
AgB01	2453868	2466459	AgB01_g165_t02	+	1391	11	transmembrane protein	SL		N	N	N	4.4	1.3	1.1	0.1	0.4	7.9	14.6	14.6	6	7.5	46.9	37.4	22.6	39	17.6	10.1	2.9	0.7	0.3	0.8	0.9	0	3.4	1.6	24.6
AgB01	2455768	2466459	AgB01_g165_t03	+	1236	9	transmembrane protein	SL		N	Y	N	5	1.4	1.2	0.1	0.4	8.8	16.4	16.4	6.8	8.5	52.3	40.6	25.3	43.4	19.5	11.3	3	0.8	0.3	0.8	1	0	3.8	1.7	27.1
AgB01	2468095	2471075	AgB01_g166_t01	+	1046	3	o-phosphoseryl-trna selenium transferase	SL		N	N	N	2.2	0.2	1.8	0.8	0.6	4.7	2.6	2.5	0.5	1.7	7	7	3.1	4.6	14.4	13.9	11.2	18.6	17.1	15.2	11.7	11.6	2.4	1.9	2.7
AgB01	2468095	2482866	AgB01_g166_t02	+	1062	3	o-phosphoseryl-trna selenium transferase	SL		N	Y	N	2.2	0.2	1.8	0.8	0.6	4.7	2.6	2.4	0.5	1.7	6.9	6.9	3	4.5	14.2	13.7	11	18.5	16.8	14.9	11.5	13	2.3	1.9	2.4
AgB01	2468165	2470759	AgB01_g166_t03	+	2595	1	o-phosphoseryl-trna selenium transferase	SL		N	N	Y	0.8	0.1	0.5	0.2	0.5	1.3	0.8	0.7	0.4	0.6	2.4	2.3	1.2	1.5	4	4.2	3.6	6.1	5.3	5.5	4.7	3.3	0.7	0.5	0.9
AgB01	2468390	2471075	AgB01_g166_t04	+	847	4	o-phosphoseryl-trna selenium transferase	SL		N	N	N	2.6	0.2	2.1	1	1	5.5	3	2.7	0.8	1.9	8.2	8.3	3.7	5.6	16.5	15.8	13.1	22.4	19.3	19.1	13.8	14.3	2.8	2.1	3.2
AgB01	2468395	2482866	AgB01_g166_t05	+	1115	3	o-phosphoseryl-trna selenium transferase	SL		N	N	N	2.3	0.2	1.8	0.8	1.2	4.5	2.3	2.1	1.1	1.5	6.4	6.5	2.8	4.3	12.8	12.4	10.7	17.8	15.5	15.3	11.1	12.4	2.1	1.7	2.4
AgB01	2473584	2482414	AgB01_g167_t01	+	1461	6	O-phosphoseryl-tRNA(Sec) selenium transferase			N	Y	N	9.4	1.9	4.4	1.2	5	15.7	11.6	10.7	5.7	2.8	7.3	6.6	7.3	9.7	14.3	24.6	25	31	29.7	25	20	17.7	6.5	4.1	6
AgB01	2473584	2491416	AgB01_g167_t02	+	6880	7	O-phosphoseryl-tRNA(Sec) selenium transferase			N	N	N	2.2	0.8	2	0.8	1.3	4.8	4.2	3.8	1.7	3.3	7.8	5.5	7	4.9	5.8	6.6	5.7	5.9	5.9	4.7	8.4	3.8	2.5	1.8	5
AgB01	2473617	2491416	AgB01_g167_t03	+	6803	7	o-phosphoseryl-trna selenium transferase			N	N	N	2.1	0.8	2	0.8	1.2	4.6	4.1	3.7	1.6	3.3	7.9	5.5	7.1	4.9	5.7	6.6	5.6	5.7	5.7	4.6	8.2	3.8	2.4	1.8	5
AgB01	2474505	2491416	AgB01_g167_t04	+	8933	2	Forkhead box protein F1			N	N	Y	0.7	0.6	1.3	0.4	0.2	1.4	1.5	1.4	0.5	2.2	5.2	3.6	4.6	2.7	2.9	2.1	2.2	2.2	2.9	2.7	5.5	1.7	1.1	0.8	3.3
AgB01	2478984	2482414	AgB01_g167_t05	+	1651	3	O-phosphoseryl-tRNA(Sec) selenium transferase			N	N	N	4.2	1.1	2.1	0.7	1.9	5.4	4	4.1	3.1	1.5	4	3.9	4.5	5.1	7.7	12.1	11.2	16.4	16	14.4	10.5	7.3	3	1.8	3.4
AgB01	2483176	2504016	AgB01_g168_t01	-	8795	4	Forkhead box protein F1			N	N	N	2.6	4.3	4	0	1.2	5.9	8.5	7.3	1.7	3.9	9	7.3	10	5.6	5.6	3.9	3.5	3.4	4.1	3.7	9.2	2.2	2.5	1.9	8.8
AgB01	2483176	2504016	AgB01_g168_t02	-	18814	5	Forkhead box protein F1			N	Y	Y	0.5	1.3	2	0.8	0.4	2.4	3.8	3.1	0.9	1.2	1.9	2	3	1.6	1.5	1	1	0.9	1	0.9	2.5	0.4	0.7	0.7	4.6
AgB01	2483176	2514020	AgB01_g168_t03	-	7936	8	Forkhead box protein F1			N	N	N	2.4	3.5	4.4	2.5	1.2	7.2	10.8	9	1.9	4.4	10.2	8.5	11.9	6.6	6.4	4.5	4.2	3.7	4.5	4.2	10.2	2.4	2.8	2.1	10.1
AgB01	2483176	2514376	AgB01_g168_t04	-	7831	7	Forkhead box protein F1			N	N	N	1.3	2.2	3.2	2	0.8	5.6	9.2	7.4	1.4	2.1	4.6	4.7	7.1	3.9	3.8	2.8	3.1	3.3	3.9	3.6	6.3	2	1.7	1.3	6.7
AgB01	2483176	2515805	AgB01_g168_t05	-	16646	7	Forkhead box protein F1			N	N	N	1	2.2	2.1	1.1	0.5	2.8	4.5	3.6	0.8	1	2.2	2.2	3.4	1.9	1.8	1.4	1.5	1.6	1.8	1.7	3	1	0.8	0.6	3.3
AgB01	2483176	2517740	AgB01_g168_t06	-	8964	7	Forkhead box protein F1			N	N	N	1.4	2.2	3.6	2.1	0.9	6.1	9.4	7.7	1.6	3.9	9	7.5	10.5	5.9	5.7	4	3.7	3.3	4	3.7	9.1	2.1	2.5	1.9	9.1
AgB01	2541264	2544098	AgB01_g169_t01	-	936	3	hypothetical protein			N	Y	N	0.1	0	0	0.2	0	0.1	0	0.1	0	0.7	0.9	0.3	0.3	0.5	0.8	0.2	0	0	0	0	0.2	0	0.3	0.8	0.5
AgB01	2541264	2544188	AgB01_g169_t02	-	2326	2	hypothetical protein			N	N	Y	0.1	0	0.2	0.2	0	0.1	0.1	0.1	0	0.5	0.6	0.4	0.5	0.3	0.4	0.1	0.1	0	0	0	0.1	0	0.1	0.4	0.5
AgB01	2578091	2586932	AgB01_g170_t01	-	1692	4	lipase family protein	SL	Telo	N	N	N	3	0.4	0.6	0.1	0.8	44.3	51.7	48.2	24	120.4	423.1	338.7	241.3	335.8	157.9	96.9	34.5	6.2	1	1.7	2.1	1	13.7	4.6	0.1
AgB01	2578091	2586932	AgB01_g170_t02	-	1845	5	lipase family protein	SL	Telo	N	Y	Y	2.5	0.5	0.5	0.1	1	46.2	49.4	47.2	22.7	96.6	340.7	296.5	217.4	323.9	136.1	92.3	33.5	5.3	0.7	1.4	2	0.9	9.4	3.4	0
AgB01	2578091	2586932	AgB01_g170_t03	-	1336	6	lipase family protein	SL	Telo	N	N	N	3.2	0.7	0.9	0.2	1.1	64.8	70.3	66.3	32.5	108.9	344.8	304.7	224.1	393.9	150	110.7	39.3	6.4	1	1.9	2.7	0	12.4	4.4	0.1
AgB01	2578091	2590279	AgB01_g171_t01	+	1167	2	lipase family protein	SL	Telo	N	Y	Y	0.9	0.1	0.1	0	0.1	5.3	6.7	6.9	6.1	42.9	139.9	96.1	80.3	61	40.3	21	6.8	2	0.7	0.8	0.7	0	7	2.1	0.1
AgB01	2589142	2596074	AgB01_g172_t01	-	1793	5	lipase family protein	SL		N	Y	Y	0.3	0.2	0.3	0	0.1	17.9	19.7	16.1	6.2	26.3	94.9	78.9	65.2	97.9	46.1	31.9	11.5	1.7	0.3	0.4	0.8	0	3.3	0.8	0
AgB01	2600597	2608853	AgB01_g173_t01	+	455	4	60S ribosomal protein L24	SL	Telo	N	N	N	147.6	32	62.9	82.1	84.6	96.2	67.7	66.7	97	330.4	426.5	605.3	643.4	309.6	506.9	550.1	1031.2	1006.5	1465.8	1730.2	1607.2	319.1	342.6	172	299.3
AgB01	2600597	2610350	AgB01_g173_t02	+	919	5	60S ribosomal protein L24	SL	Telo	N	N	N	182	37.3	68	92	100.9	114.2	91	87.3	142.5	209	287	348.5	357.7	179	288.1	328.5	599.6	656.6	965	1050.7	1013.6	581.2	279.1	141.2	241.1
AgB01	2600602	2610350	AgB01_g173_t03	+	957	5	60S ribosomal protein L24	SL	Telo	N	N	Y	174.8	35.8	65.3	88.4	96.9	109.7	87.5	84	136.7	201.6	276	336	345.6	172.5	278.2	316.3	577.9	632.1	927.8	1011.1	974.9	565.4	275.2	136.7	234.5
AgB01	2600626	2608853	AgB01_g173_t04	+	469	4	60S ribosomal protein L24	SL	Telo	N	Y	N	143.2	31	61	79.7	82.1	93.4	66	65.1	93.9	322.2	414.5	589.9	628	301.6	494.8	535.3	1004.7	979.8	1424.5	1682.8	1562.3	324.4	346.9	169	296.6
AgB01	2601595	2608853	AgB01_g173_t05	+	401	4	60S ribosomal protein L24	SL	Telo	N	N	N	168.3	36.4	71.3	93.3	96	109.3	76.1	75.6	109.8	365.6	471.1	665.2	705.7	344.3	557.1	609.4	1142.9	1087.9	1602.7	1853.1	1742.3	357.8	402.3	185.3	326.2
AgB01	2601595	2610350	AgB01_g173_t06	+	865	5	60S ribosomal protein L24	SL	Telo	N	N	N	193.7	39.7	72.2	97.8	107.2	121.4	96.3	92.7	151.3	217.8	298.9	360.2	368.7	187	297.7	342.2	624.5	672.5	997.2	1065.3	1039.2	615.5	302.9	145.5	249.9
AgB01	2628690	2638798	AgB01_g174_t01	+	4476	8	DNA-directed RNA polymerase II subunit RPB1		Telo	N	N	Y	1.4	2.7	1.2	0.6	0.3	1.1	0.7	0.9	0.6	0.3	1.3	1.5	3.7	3.6	4.2	4.7	3.9	0.6	0.1	0.1	2.7	1.9	0.3	1.2	0
AgB01	2628896	2638798	AgB01_g174_t02	+	3653	9	DNA-directed RNA polymerase II subunit RPB1		Telo	N	Y	N	1.2	2.8	1.7	0.8	0.4	1.3	1	1.1	1	0.4	1.6	1.9	4.7	4.5	5.3	5.9	5.4	0.8	0.2	0.2	3.4	3.3	0.4	1.5	0
AgB01	2629297	2638798	AgB01_g174_t03	+	3079	8	hypothetical protein		Telo	N	N	N	1.2	2.8	2	1.1	0.5	1.5	1.4	1.7	1.5	0.4	1.6	1.8	4.7	4.7	5.8	6.1	5.9	0.8	0.2	0.2	3.7	2.8	0.5	1.7	0.1
AgB01	2630698	2631117	AgB01_g174_t04	+	420	1	hypothetical protein			N	N	N	0.5	5.4	0.3	0.8	0	0.6	0.2	0.7	0	0	1.1	0.5	1.4	3.1	2.8	3.4	1	0.4	0.3	0.1	1.1	0	0	0.8	0
AgB01	2641082	2661779	AgB01_g175_t01	-	1986	7	Heterogeneous nuclear ribonucleoprotein A1, partial	SL		N	N	N	39.3	10.8	9.9	3.2	11.6	44.1	22	20.5	3.9	30.9	58.7	56.2	67.9	58	163	302.2	386.1	381.3	431.3	282.4	107.3	159.3	79.2	33.4	124.1
AgB01	2641082	2662539	AgB01_g175_t02	-	2744	7	Heterogeneous nuclear ribonucleoprotein A1, partial	SL		N	N	Y	29	8.2	7.3	2.3	8.4	32	15.9	14.9	3	21.9	41.8	40.6	49.5	42.1	115	214.4	273.2	275.1	311.9	207.8	81.9	109.6	57	24	89
AgB01	2641082	2662589	AgB01_g175_t03	-	2100	10	Heterogeneous nuclear ribonucleoprotein A1, partial	SL		N	N	N	37.6	10.2	9.4	3.1	11	42.3	21.4	19.8	3.7	34.8	66.6	63.7	75.5	65	164.2	294.3	385.6	387.9	439.7	284.7	110	208.3	80.5	34.9	130.1
AgB01	2641082	2662589	AgB01_g175_t04	-	1841	7	Heterogeneous nuclear ribonucleoprotein A1, partial	SL		N	N	N	35	9.9	9.3	3	9.9	41.5	20.3	19.3	3.4	25.6	42.5	50	58.1	50.3	125.2	234.9	279.9	318.9	350	232.3	91.3	156.8	72.1	32.5	109.5
AgB01	2641082	2662589	AgB01_g175_t05	-	2099	9	Heterogeneous nuclear ribonucleoprotein A1, partial	SL		N	N	N	37.6	10.2	9.4	3.1	11	42.3	21.4	19.8	3.7	34.6	66.4	63.7	75.4	65	164	294	385.4	387.1	438.4	283.8	109.6	198.5	80.3	34.7	129.3
AgB01	2641082	2662589	AgB01_g175_t06	-	2100	9	Heterogeneous nuclear ribonucleoprotein A1, partial	SL		N	N	N	37.6	10.2	9.4	3.1	11	42.3	21.4	19.8	3.7	34.8	66.6	63.7	75.5	65	164.2	294.3	385.6	387.9	439.7	284.7	110	208.3	80.5	34.9	130.1
AgB01	2641082	2662589	AgB01_g175_t07	-	2011	8	Heterogeneous nuclear ribonucleoprotein A1, partial	SL		N	N	N	38.8	10.7	9.7	3.2	11.4	43.6	21.7	20.2	3.9	33.6	65.5	64	75.6	65.5	162.8	297.2	389.9	391	442.6	288.5	112.1	143.6	78.1	33	122.5
AgB01	2643779	2659915	AgB01_g175_t08	-	904	3	Heterogeneous nuclear ribonucleoprotein A1			N	N	N	38	10.3	9.9	3.9	9.9	48.7	21.3	23	3.7	21.5	31.9	39.8	62.7	44.3	90.5	205.8	267.5	234.2	256.5	161	69	126.2	66.8	30.3	107.3
AgB01	2645084	2662589	AgB01_g175_t09	-	685	5	Heterogeneous nuclear ribonucleoprotein A1, partial	SL		N	N	N	76.1	18.4	17.3	5.5	27.9	80.4	42.4	37.9	8.4	62.9	126.2	137.8	151.4	145.2	335.1	625.8	832.7	765.6	868.8	603.6	227.2	108.5	85.2	33	151
AgB01	2655284	2659915	AgB01_g175_t10	-	1401	5	Heterogeneous nuclear ribonucleoprotein A1			N	N	N	29	8.8	7.8	2.9	7	36	16.8	16.6	2.8	23	40.9	37.2	50.1	36.6	96.9	184.8	233.3	261.8	300.4	176.9	74	195	83.7	36.4	123.4
AgB01	2655284	2662539	AgB01_g175_t11	-	2418	7	Heterogeneous nuclear ribonucleoprotein A1, partial	SL		N	N	N	32.9	9.2	8.2	0	9.6	36.3	18.1	16.9	3.4	26.2	49.5	47.7	57.8	49.5	136.1	251.1	321.3	325.4	372.4	246	96.7	137.3	66.2	27.8	103.2
AgB01	2655284	2662589	AgB01_g175_t12	-	1685	8	Heterogeneous nuclear ribonucleoprotein A1, partial	SL		N	N	N	46.2	12.5	11.6	3.8	13.7	52	25.9	24.1	4.6	42	81.1	78.7	92.6	80.7	202.4	365.9	481.4	485.6	554.8	359	139.1	189.8	95.3	40.1	149.5
AgB01	2655284	2662589	AgB01_g175_t13	-	1772	9	Heterogeneous nuclear ribonucleoprotein A1, partial	SL		N	Y	N	44.4	12	11.1	3.7	13	50.1	25.3	23.5	4.4	41.5	79.5	75.7	89.5	77.2	195.6	350.6	460.2	467.9	534.9	345.4	133.6	247.8	96.3	41.7	155.4
AgB01	2655284	2662791	AgB01_g175_t14	-	1975	8	Heterogeneous nuclear ribonucleoprotein A1, partial	SL		N	N	N	38.5	10.5	9.6	3.1	10.7	42.6	21.7	20.1	3.5	29.7	54.7	53.9	63.3	54.3	160.1	294.1	356	384.9	436.3	286.1	108	221.4	83	36.5	133.5
AgB01	2658905	2662589	AgB01_g175_t15	-	720	5	Heterogeneous nuclear ribonucleoprotein A1, partial	SL		N	N	N	75.9	18.6	17.2	5.5	27.2	80.3	42.5	38	8.3	61.6	122.3	133.9	149.1	146.4	329.9	624.5	825.4	763.9	865.3	601.8	227	103.2	88.9	33.7	156.4
AgB01	2658905	2662786	AgB01_g175_t16	-	612	5	Heterogeneous nuclear ribonucleoprotein A1, partial	SL		N	N	N	89	21.8	20.1	6.4	32	93.9	50.1	44.6	9.7	57.4	112.6	123.6	141	137.3	355.7	705.5	896.9	816	923.4	649.8	237.5	118.6	101	38.5	177.7
AgB01	2666855	2673171	AgB01_g176_t01	-	3135	7	Heterogeneous nuclear ribonucleoprotein A1	SL	Telo	N	N	N	5.4	1.3	2	0.7	1.8	9.7	7.8	7.7	2.3	27.8	92.4	96.8	91.4	74.5	142.3	198.1	212.5	281.8	295.2	245.6	103.9	242.1	31.5	16.5	23.4
AgB01	2666855	2673171	AgB01_g176_t02	-	2014	8	Heterogeneous nuclear ribonucleoprotein A1	SL	Telo	N	N	N	7.9	1.6	3	1	2.9	14.9	12.2	12	3.6	43.2	143.7	150.1	141.9	115.8	221	307.1	329.6	435	452.5	370.2	152	373.4	49.1	26.1	36.2
AgB01	2666855	2673204	AgB01_g176_t03	-	3622	6	Heterogeneous nuclear ribonucleoprotein A1	SL	Telo	N	N	Y	4.7	1.1	1.6	0.5	1.8	7.6	6	6.1	1.7	23.8	79.8	81.2	76.9	62.6	121	166.6	169.8	232.5	244.1	199.6	83	213.3	25.7	13.8	19.6
AgB01	2666855	2673287	AgB01_g176_t04	-	2124	8	Heterogeneous nuclear ribonucleoprotein A1	SL	Telo	N	Y	N	7	1.5	2.6	0.8	2.6	13.1	10.5	10.6	3	41.6	138.6	141.4	134.3	108.3	210.7	289.6	294.6	408.3	427.1	349.5	142.1	367.9	44.8	24.2	33.6
AgB01	2670492	2670874	AgB01_g177_t01	.	383	1	Heterogeneous nuclear ribonucleoprotein A1, partial			N	Y	Y	3.6	0.5	1.8	0.7	0.5	6.2	6.5	4.2	2.9	2.7	11.1	18.7	9.1	15	19.1	28.1	114.3	61.9	54.8	47.3	28.5	31.6	12	5.4	7.9
AgB01	2673496	2684114	AgB01_g178_t01	-	3590	5	wu:fc32f04 protein			N	N	N	10.8	22	1.5	0.1	0.2	0	0	0	0	0.1	0.1	0.1	0	0.1	0.2	0.1	0.1	0	0	0.2	0.3	0	0.1	0	0
AgB01	2673496	2691772	AgB01_g178_t02	-	3817	10	wu:fc32f04 protein			N	N	N	12.8	25.2	1.8	0.1	0.2	0	0	0	0	0.1	0.1	0.1	0	0.1	0.2	0.1	0.1	0	0	0.2	0.3	0	0.1	0	0
AgB01	2673496	2691812	AgB01_g178_t03	-	6004	10	wu:fc32f04 protein			N	Y	Y	10.9	18.4	1.4	0.1	0.2	0	0	0	0	0	0.1	0.1	0	0	0.2	0.1	0	0	0	0.2	0.3	0	0.1	0	0
AgB01	2673496	2691849	AgB01_g178_t04	-	3813	9	wu:fc32f04 protein			N	N	N	12.8	24.6	1.8	0.1	0.2	0	0	0	0	0.1	0.1	0.1	0	0.1	0.2	0.1	0.1	0	0	0.2	0.4	0	0.1	0	0
AgB01	2706405	2706931	AgB01_g179_t01	.	527	1	hypothetical protein			N	Y	Y	0	0	0	0	0	0.5	0.4	0.8	0	0.1	1.2	0.5	0	0.1	0.4	0	0.1	0	0	0	0	0	0.1	0	0
AgB01	2707494	2707885	AgB01_g180_t01	.	392	1	hypothetical protein			N	Y	Y	0	0	0	0	0	0	0	0	0	0	0	0.1	0	0	0.3	0	0	0	0	0.7	0.3	4.4	0.1	0	0
AgB01	2707969	2708529	AgB01_g181_t01	.	561	1	hypothetical protein			N	Y	Y	0.1	0	0	0	0	0	0	0.1	0	0	0.1	0	0	0.2	0.5	0.1	0	0	0.2	1.3	0.9	6.2	0.1	0	0
AgB01	2726683	2732738	AgB01_g182_t01	-	1524	4	hypothetical protein			N	Y	Y	0.2	0.1	0	0	0	0.1	0	0	0.1	0.3	0	0	0.3	0.2	1.5	1.6	1	1	0.1	0.5	3	6.8	0.5	0.3	12.2
AgB01	2729887	2732738	AgB01_g182_t02	-	1002	2	hypothetical protein			N	N	N	0.1	0	0	0	0	0.2	0	0	0	0.5	0	0	0.4	0.2	1.5	1.6	1.1	1.1	0.1	0.4	2.3	8.6	0.5	0.4	10.1
AgB01	2768100	2781032	AgB01_g183_t01	-	2404	9	serine threonine-protein kinase-transforming protein mos			N	N	N	0.4	0.2	0.3	0.2	0	22.1	47.1	45.4	12.7	25.1	71.3	59.2	61.1	77	28.1	17.1	6.9	8	3.8	3.1	2.5	0	1.7	0.4	0
AgB01	2768100	2781032	AgB01_g183_t02	-	2541	10	serine threonine-protein kinase-transforming protein mos			N	N	N	0.4	0.2	0.3	0.2	0	21.7	45.7	44.8	12	24	68.6	57.1	59.3	73.6	26.8	16.2	6.7	7.8	3.9	3.1	2.6	0	1.7	0.4	0
AgB01	2768100	2781032	AgB01_g183_t03	-	2738	11	Serine/threonine-protein kinase			N	N	Y	0.4	0.2	0.3	0.2	0	24.3	50.6	49.4	13.6	23.1	64.7	53.8	56.9	73.4	26	16.1	6.6	7.3	3.4	2.8	2.4	0	1.6	0.4	0
AgB01	2768100	2781058	AgB01_g183_t04	-	2627	10	Serine/threonine-protein kinase			N	Y	N	0.4	0.2	0.3	0.3	0	25.2	52.6	51.2	14.2	23.8	66.9	55.5	58.4	76.2	26.9	16.7	6.7	7.5	3.5	2.9	2.4	0	1.7	0.4	0
AgB01	2768100	2781058	AgB01_g183_t05	-	2734	11	Serine/threonine-protein kinase			N	N	N	0.4	0.2	0.3	0.2	0	24.6	51	50.2	13.6	23.2	65.1	54.4	57.4	73.9	26.1	16.1	6.6	7.3	3.6	2.9	2.3	0	1.6	0.4	0
AgB01	2770684	2781013	AgB01_g183_t06	-	2499	8	serine threonine-protein kinase-transforming protein mos			N	N	N	0.4	0.3	0.3	0.2	0	20.7	41.9	41.1	8.4	12	28.8	35.7	44.1	49.9	15.6	9.9	4.6	6.1	2.7	2.3	1.6	1.4	0.8	0.2	0
AgB01	2770684	2771004	AgB01_g184_t01	+	321	1	hypothetical protein			N	Y	Y	0.1	0	0	0	0	11.2	14.2	18.9	0	1.9	6.7	5.2	5.6	8.2	1.9	1.2	0.2	4.2	2.1	2.2	0.9	5.4	0.4	0.1	0
AgB01	2784187	2788056	AgB01_g185_t01	-	1161	4	hypothetical protein			N	N	N	0.7	1.3	2.1	0	0.1	0.2	1	1.1	0	0	0.1	0.1	0.1	0.1	0.3	0.2	0	0	0	0	9.6	0	0	0	0
AgB01	2784187	2805199	AgB01_g185_t02	-	3621	19	hypothetical protein			N	N	Y	1.1	1.4	0.6	0	0	0.1	0.3	0.4	0	0	0	0.3	0.2	0.1	0.5	0.7	0.4	0.1	0	0	11.4	0.5	0	0	0
AgB01	2784187	2805199	AgB01_g185_t03	-	2919	20	hypothetical protein			N	Y	N	1.3	1.6	0.6	0	0	0.1	0.2	0.3	0	0	0.1	0.3	0.2	0.1	0.6	0.8	0.5	0.1	0	0	14.1	0.6	0	0	0
AgB01	2784187	2805199	AgB01_g185_t04	-	2892	20	hypothetical protein			N	N	N	1.4	1.8	1	0	0	0.1	0.4	0.5	0	0	0.1	0.3	0.3	0.2	0.7	0.9	0.5	0.1	0	0	14.9	0.6	0	0	0
AgB01	2784187	2805199	AgB01_g185_t05	-	2880	20	hypothetical protein			N	N	N	1.4	1.8	0.9	0	0	0.1	0.4	0.5	0	0	0.1	0.3	0.3	0.2	0.7	0.9	0.5	0.1	0	0	14.6	0.6	0	0	0
AgB01	2785923	2788156	AgB01_g185_t06	-	1512	2	hypothetical protein			N	N	N	0.6	1.2	1.9	0	0	0.1	0.8	0.8	0	0	0.1	0	0.1	0	0.1	0.1	0	0	0	0	6	0	0	0	0
AgB01	2794435	2799050	AgB01_g185_t07	-	1180	5	hypothetical protein			N	N	N	0.9	1.8	0.1	0	0	0	0.1	0.1	0	0.1	0	0.4	0.4	0.2	0.4	1.2	0.8	0.1	0	0	11.5	0	0	0	0
AgB01	2799819	2805199	AgB01_g185_t08	-	972	8	hypothetical protein			N	N	N	1.2	1.2	0.1	0	0	0	0	0.1	0	0	0	0.1	0	0	0.7	0.7	0.1	0.1	0	0	14.1	0	0	0	0
AgB01	2785951	2788056	AgB01_g186_t01	+	718	2	hypothetical protein			N	N	N	0.9	1.8	3.2	0	0.1	0.2	1.6	1.6	0	0	0.1	0.1	0.2	0	0.1	0.1	0	0.1	0	0	6.5	0	0	0	0
AgB01	2785951	2789271	AgB01_g186_t02	+	911	3	hypothetical protein			N	N	N	1.3	1.6	3.2	0	0.1	0.2	2.1	1.8	0	0	0.3	0.3	0.3	0.3	0.7	0.2	0.2	0	0	0.2	6.3	0	0	0	0.1
AgB01	2787125	2789271	AgB01_g186_t03	+	1853	2	hypothetical protein			N	Y	Y	0.9	0.6	1.4	0	0	0.1	0.8	0.7	0	0	0.1	0	0.2	0.1	0.3	0.1	0	0	0	0.1	2	0	0	0	0
AgB01	2806221	2806536	AgB01_g187_t01	.	316	1	hypothetical protein			N	Y	Y	0	0	0	0	0	0	0	0	0	0	0	0	0	0	0	0	0	0	0	0	1.9	0	0	0	0
AgB01	2811154	2815959	AgB01_g188_t01	+	778	6	hypothetical protein		Telo	N	Y	N	134.5	227.9	113.7	1.4	13.1	0.2	0.2	0.1	0.1	0.3	0.1	0	0.5	0	0.1	0.1	0.3	0	0	0	3.2	0	1.3	0.1	1
AgB01	2811262	2815407	AgB01_g188_t02	+	1131	7	hypothetical protein		Telo	N	N	Y	111.6	182.9	93.5	1.6	10.3	0.1	0.2	0.1	0.2	0.2	0.1	0.2	0.3	0.1	0.5	0.5	0.7	0	0	0.3	5.9	0	2	1.9	0.7
AgB01	2811281	2815959	AgB01_g188_t03	+	564	5	hypothetical protein		Telo	N	N	N	145.5	240.4	122.3	1.3	15.8	0.3	0.3	0.1	0.2	0.4	0.1	0	0.7	0.1	0.1	0.2	0.4	0	0	0	4.2	0	1.3	0.2	1.2
AgB01	2811305	2815407	AgB01_g188_t04	+	949	6	hypothetical protein		Telo	N	N	N	104.3	169.7	80.2	1.5	9.9	0.1	0.1	0.1	0.2	0.1	0.1	0.3	0.4	0.2	0.5	0.5	0.9	0	0	0.3	6.6	0	2	2.2	0.7
AgB01	2814339	2815407	AgB01_g188_t05	+	566	2	hypothetical protein			N	N	N	56	78.6	47.2	0.6	4.7	0.1	0.2	0	0.2	0.3	0	0.5	0	0.2	1	0.8	1.2	0	0	0.6	8	0	2	3.7	0.2
AgB01	2816396	2826161	AgB01_g189_t01	-	2025	13	gamma-2-syntrophin			N	Y	Y	0.2	0.5	0.1	0	0.1	0	0	0	1	0.3	0	0.2	0.2	0.2	0.7	0.6	0.5	0.1	0.1	2.4	26.4	8.5	5.1	13.9	0
AgB01	2819211	2826161	AgB01_g189_t02	-	701	5	Gamma-2-syntrophin			N	N	N	0.1	0.2	0.2	0	0	0	0	0	0.8	0.2	0	0	0.2	0	0.2	0.2	0.2	0.1	0.1	1.8	25.3	9.9	3.7	12.4	0
AgB01	2835815	2849579	AgB01_g190_t01	+	4502	8	Clc-like protein 2		Telo	N	Y	N	0.2	0.1	0.1	0	1.4	0.1	0	0	0	0	1.2	1.2	0.6	1.2	0.6	0.3	0	0	0	0	0.7	9.2	11.5	16.4	0
AgB01	2835862	2849579	AgB01_g190_t02	+	3963	9	Clc-like protein 2		Telo	N	N	N	0.1	0.1	0.1	0	1.2	0.1	0	0	0	0	0.9	1	0.7	0.8	0.4	0.2	0.1	0	0	0	0.5	8.7	9.8	14.3	0
AgB01	2836162	2849579	AgB01_g190_t03	+	4540	7	Clc-like protein 2		Telo	N	N	Y	0.2	0.1	0.1	0	1.3	0.1	0	0	0	0	1.2	1.2	0.6	1.2	0.6	0.3	0	0	0	0	0.6	9.1	11.1	15.8	0
AgB01	2852079	2855986	AgB01_g191_t01	-	1629	3	hypothetical protein			N	N	N	0.5	0.1	0.2	0	0.1	0	0	0.1	0.1	0.2	0.2	0	0.3	0.1	0.2	0	0	0	0	0	0.1	6.4	7.9	24.9	0
AgB01	2852079	2855986	AgB01_g191_t02	-	1646	3	hypothetical protein			N	Y	N	0.5	0.1	0.2	0	0.1	0	0	0.1	0.1	0.2	0.2	0	0.3	0.1	0.2	0	0	0	0	0	0.1	6.3	7.8	25	0
AgB01	2852079	2855986	AgB01_g191_t03	-	1791	3	hypothetical protein			N	N	Y	0.5	0.1	0.1	0	0.1	0	0	0	0.1	0.1	0.1	0	0.2	0.1	0.2	0	0	0	0	0	0.1	5.8	7.3	23.3	0
AgB01	2857178	2865768	AgB01_g192_t01	+	873	3	hypothetical protein	SL		N	Y	N	0	0.1	0	0.2	0.3	0	0	0	0	0	0	0	0	0	0.1	0.1	0	0	0	0	0.4	2	2.2	2.2	0
AgB01	2857192	2858408	AgB01_g192_t02	+	248	2	hypothetical protein			N	N	N	0	0	0	0	0	0	0	0	0	0	0	0	0	0.2	0	0.2	0	0	0	0	0	7	0.2	2.6	0.2
AgB01	2861675	2865768	AgB01_g192_t03	+	2440	3	hypothetical protein	SL		N	N	Y	0	0	0.1	0.1	0.1	0	0	0	0	0	0	0	0	0	0	0	0	0	0	0	0.2	0.7	1	0.8	0
AgB01	2858708	2864082	AgB01_g193_t01	-	3967	3	hypothetical protein	SL		N	N	Y	0.2	0.1	4	4.2	4.2	0.1	0	0	0.9	1.7	0	0	0	0	0	0	0	0	0	0.1	2.3	13.1	23.5	20.9	0
AgB01	2858708	2864082	AgB01_g193_t02	-	2782	4	hypothetical protein	SL		N	Y	N	0.3	0.2	5.6	6	6	0.2	0.1	0	1.2	2.4	0	0	0	0	0	0	0	0	0	0.1	3.3	18.6	33.7	29.9	0
AgB01	2865833	2876460	AgB01_g194_t01	+	4304	7	clc-like protein 2	SL		N	N	Y	0.1	0	0	0	0	0.5	0.1	0.1	0	0	0	0.1	0.2	0.1	0.8	0.4	0	0.1	0.1	4.6	31.1	1.2	0.5	1.2	0
AgB01	2866868	2889102	AgB01_g194_t02	+	2108	10	clc-like protein 2	SL		N	Y	N	0.2	0.1	0.1	0	0	0.9	0.1	0.2	0	0.1	0.3	0.3	0.6	0.6	1.7	0.9	0.1	0.3	0.4	11.1	56.1	2.5	0.8	1.9	0
AgB01	2866943	2867954	AgB01_g194_t03	+	646	2	Clc-like protein 2	SL		N	N	N	0	0.1	0	0	0	0.7	0	0	0	0	0.1	0.2	0.4	0.3	2	1.2	0	0.1	0.3	10.1	67.5	2.7	0.7	1.6	0
AgB01	2868008	2876460	AgB01_g194_t04	+	3445	5	clc-like protein 2			N	N	N	0.1	0	0	0	0	0.5	0	0.1	0	0	0	0.1	0.2	0.1	0.7	0.2	0.1	0.1	0	3.9	25.2	1	0.5	1.6	0
AgB01	2872740	2876460	AgB01_g194_t05	+	2791	2	Clc-like protein 2			N	N	N	0	0	0	0	0	0.1	0	0.1	0	0	0	0.1	0.2	0.1	0.5	0.1	0	0.1	0	2.6	16.8	1.2	0.3	0.9	0
AgB01	2873561	2876460	AgB01_g194_t06	+	2900	1	Clc-like protein 2			N	N	N	0	0	0	0	0	0	0	0	0	0	0	0.1	0	0.1	0.3	0.1	0	0.1	0	1.7	11.2	1.2	0.2	0.5	0
AgB01	2885069	2890423	AgB01_g195_t01	+	1155	4	Clc-like protein 5			N	N	N	0.2	0.1	0	0	0	0	0	0	0.2	0	0.3	0.6	0.6	0.7	0.7	0.4	0.2	0.5	0.5	9.4	16.9	4.5	0.1	0.1	0
AgB01	2885069	2893698	AgB01_g195_t02	+	3946	4	Clc-like protein 5			N	Y	N	0.1	0.1	0.1	0	0	0	0	0	0.2	0.1	0.4	0.3	0.2	0.4	0.8	0.6	0.1	0.3	0.7	5.5	10	6.6	0.2	0.1	0
AgB01	2885342	2893698	AgB01_g195_t03	+	4338	3	Clc-like protein 5			N	N	Y	0	0.1	0	0	0	0	0	0	0.2	0.1	0.3	0.2	0.2	0.3	0.7	0.5	0.1	0.3	0.6	5.2	9.5	6	0.2	0.1	0
AgB01	2889157	2890423	AgB01_g195_t04	+	807	2	Clc-like protein 5			N	N	N	0.1	0	0	0	0	0	0	0	0	0	0.2	0.3	0.9	0.6	0.3	0.2	0	0.4	0.3	5.7	9.4	0	0.1	0.1	0
AgB01	2890705	2921694	AgB01_g196_t01	-	3893	8	Clc-like protein 5			N	Y	Y	0.6	0.1	1	0	0	0	0	0	0.7	1.4	0.4	0.2	0.2	0.3	2.3	3.8	2.8	0.8	2.5	4.8	7.3	16.4	0.5	0.3	0.2
AgB01	2894853	2921694	AgB01_g196_t02	-	1659	8	hypothetical protein			N	N	N	1.4	0.2	2.5	0	0.1	0.1	0	0.1	1.8	3.2	0.2	0	0.1	0	4.6	8.9	6.6	2	5.9	4.2	7	36.5	0.9	0.7	0.4
AgB01	2950238	2975986	AgB01_g197_t01	+	3420	28	Serine protease, partial	SL		N	Y	N	0.7	0.2	0	0	2	0	0	0	0	0	0	0	0.1	0.1	0.2	0.3	0.3	0.1	0	0	0.5	0	18.9	5.8	127.9
AgB01	2950238	2975986	AgB01_g197_t02	+	3911	26	Serine protease, partial	SL		N	N	Y	0.5	0.1	0	0	1.5	0	0	0	0	0	0	0	0	0.1	0.2	0.2	0.2	0.1	0	0	0.4	0	16	4.9	107
AgB01	2950277	2964109	AgB01_g197_t03	+	1750	14	Serine protease	SL		N	N	N	0.9	0.3	0.1	0	2	0	0	0	0	0.1	0	0.1	0.2	0.1	0.3	0.4	0.5	0.1	0	0	0.6	0	14.8	6	149.9
AgB01	2973755	2979403	AgB01_g198_t01	-	562	3	surf1-like protein			N	Y	Y	3.5	0.3	1	0.3	0.8	5.8	2.2	2.4	1.8	1.1	6.1	5.2	3.9	2.3	4.8	4.7	3.7	5.9	5.9	4.9	3.2	0	1	1.2	1.2
AgB01	2986131	2994316	AgB01_g199_t01	+	3392	3	60s ribosomal protein l29	SL		N	N	N	29.1	3.2	7.8	7	9.9	14.8	12.3	10.9	11.9	56.3	87.6	88.6	87	21	59.5	56.1	201.3	81.8	87.7	50.2	74.2	27.5	79.8	19.7	40.6
AgB01	2986131	3005524	AgB01_g199_t02	+	3538	7	THO complex subunit 7	SL		N	N	N	28.4	3.2	7.7	7	9.8	15.6	12.5	11.2	11.6	63.9	169.5	177.3	160.4	54.7	93.6	89.4	232.8	97.6	97.5	58.3	77.2	31.3	79.2	20.5	42.3
AgB01	2986131	3015446	AgB01_g199_t03	+	3794	8	THO complex subunit 7	SL		N	N	N	26.7	3	7.2	6.5	9.2	14.6	11.7	10.5	10.8	59.9	160.8	167	150.9	53.1	89.4	85	218	92.3	92.1	54.9	72.6	30.1	74.1	19.2	39.8
AgB01	2986131	3021425	AgB01_g199_t04	+	7451	10	THO complex subunit 7	SL		N	N	N	18.7	18.3	10	4.5	5.9	10.2	7.8	7.1	6.2	33.2	99.3	94.4	83.3	42.7	61.2	56.6	118.8	58.8	55.7	34.4	43	21.8	43.6	16.8	32.8
AgB01	2986131	3021425	AgB01_g199_t05	+	7669	9	THO complex subunit 7	SL		N	N	Y	15.8	9.6	6.6	3.7	5	8.5	6.6	6	5.8	31.4	89.9	88.1	78.1	35.2	53.7	49.6	112.3	52.3	50.3	30.9	39.3	18.7	39.6	12.9	25.7
AgB01	2988922	3021425	AgB01_g199_t06	+	5572	9	THO complex subunit 7	SL		N	N	N	23.4	24.3	13.2	5.7	7.7	13.6	10.4	9.4	8.1	44.5	135.7	128.1	111.8	57.7	82.9	76.2	159.3	79.1	74.8	46.2	57.5	29.2	58.5	22.5	43.9
AgB01	2989109	3021425	AgB01_g199_t07	+	7014	9	THO complex subunit 7	SL		N	N	N	19	19.3	10.5	0	6.2	10.8	8.3	7.5	6.4	44.8	119.3	114.1	98.1	47.9	73.3	65.8	138.8	66.8	64.6	40.8	51.1	23.7	46.6	18.5	36
AgB01	2989109	3021425	AgB01_g199_t08	+	6973	9	THO complex subunit 7	SL		N	N	N	19.1	19.4	10.6	4.6	6.1	10.9	8.3	7.6	6.5	45	119.9	114.7	98.6	48.1	73.6	66.2	139.7	67.1	65	41	51.4	23.8	46.8	18.6	36.1
AgB01	2990440	2998472	AgB01_g199_t09	+	1467	6	THO complex subunit 7	SL		N	N	N	62.5	7.3	18.2	16	23	37.6	30	26.8	26.9	197.5	455.1	479.8	424.7	135.3	256.5	236	617	250.7	257.3	158.6	209.9	76.6	190.9	51.8	106.4
AgB01	2991438	3021425	AgB01_g199_t10	+	5859	9	THO complex subunit 7	SL		N	Y	N	19.1	12.4	8.6	4.7	6.5	11.1	8.7	7.8	7.3	41.3	118.1	115.8	102.8	46.1	70.5	65.3	147.5	68.6	65.9	40.6	51.5	25.1	51.5	17.1	33.7
AgB01	3014495	3021425	AgB01_g199_t11	+	6595	2	Protein tyrosine phosphatase type IVA 3			N	N	N	6.3	19.1	7.2	1.3	1.4	3.2	2.2	2	0.8	3.2	21.7	12.1	7.6	17.2	17.8	15	9	14.2	11.1	8.1	7.5	8.1	6.9	8	14.4
AgB01	3015928	3021425	AgB01_g199_t12	+	4851	3	Protein tyrosine phosphatase type IVA 3			N	N	N	6.2	20.7	7.6	1.2	1.5	3	2.1	2.1	0.9	3.1	20.6	10.9	6.8	16	16.9	13.4	8.1	12	9.4	7.4	7.1	7.5	7	8.5	15.1
AgB01	3013548	3036912	AgB01_g200_t01	-	7455	8	Protein tyrosine phosphatase type IVA 3	SL		N	N	N	28.7	66.7	41.2	12.7	10.4	21.3	22.5	18.7	3.8	3.9	15.6	19.1	36.7	27	15.5	18	23.1	11.3	10	8	6.7	7.4	4.7	6.4	13.9
AgB01	3013548	3041602	AgB01_g200_t02	-	13525	6	Protein tyrosine phosphatase type IVA 3	SL	Telo	N	N	Y	17.2	40.9	24.1	7.2	6	12.1	12.7	10.6	2.3	2.3	10.4	11.4	20.7	16.2	9.7	10.8	13.4	6.9	6.2	5	4.4	4.3	3.4	4.6	9.6
AgB01	3013548	3045663	AgB01_g200_t03	-	8655	6	Protein tyrosine phosphatase type IVA 3	SL	Telo	N	Y	N	25.9	61.7	37	11.1	9.3	18.9	19.8	16.6	3.5	3.6	16.2	17.7	32.2	25	15	16.6	20.6	10.6	9.5	7.7	6.6	6.2	5.2	7.2	15
AgB01	3089519	3104894	AgB01_g201_t01	+	365	4	hypothetical protein			N	N	N	0	1.7	0.1	2.3	0.6	0	0	0	3	2	1.8	0.1	1.3	1.6	3.5	0.8	0.6	0.1	0	0.9	3	9.5	50	2.5	30.3
AgB01	3089519	3114823	AgB01_g201_t02	+	3753	11	Nuclear hormone receptor family member nhr-1		Telo	N	N	N	0.2	0.1	0.2	0	1.2	0.1	0	0	1.6	1.3	0.4	0.6	1.4	1.9	2.4	1.4	0.9	0.1	0	0.7	2.7	6.9	9.3	0.7	11.2
AgB01	3090057	3114823	AgB01_g201_t03	+	4967	9	Nuclear hormone receptor family member nhr-1		Telo	N	N	N	0.2	0.1	0.2	1	0.9	0.1	0	0	1.4	1.1	0.4	0.5	1.1	1.6	1.9	1.1	0.7	0.1	0.1	0.6	2.2	5.9	7.2	0.6	9
AgB01	3090059	3110142	AgB01_g201_t04	+	1471	9	Nuclear hormone receptor family member nhr-1		Telo	N	Y	N	0.5	0	0.3	2.7	2.7	0.1	0.1	0.1	4	1.7	1	1.3	2.8	4.3	3.5	2.9	1.7	0.2	0.1	0.9	2.6	9.4	10.9	1.1	13.9
AgB01	3090059	3114823	AgB01_g201_t05	+	3850	11	Nuclear hormone receptor family member nhr-1		Telo	N	N	N	0.2	0.1	0.2	1.3	1.2	0.1	0	0	1.8	1.3	0.5	0.6	1.4	1.9	2.3	1.4	0.9	0.1	0	0.7	2.6	6.7	8.6	0.7	10.7
AgB01	3090356	3114823	AgB01_g201_t06	+	4236	10	Nuclear hormone receptor family member nhr-1		Telo	N	N	N	0.2	0.1	0.2	1.2	1.1	0.1	0	0	1.7	1.1	0.4	0.5	1.3	1.7	2.1	1.2	0.8	0.1	0	0.6	2.3	5.3	7.7	0.6	9
AgB01	3103406	3114823	AgB01_g201_t07	+	5876	8	Nuclear hormone receptor family member nhr-1		Telo	N	N	Y	0.3	0.5	0.2	0.8	0.8	0.1	0	0	1.1	0.8	0.3	0.4	0.9	1.3	1.6	1	0.6	0.1	0	0.4	1.8	4.4	5.2	0.4	6.6
AgB01	3103846	3104894	AgB01_g201_t08	+	250	3	hypothetical protein			N	N	N	0	0.9	0	3.1	0.9	0	0	0	2.2	0.2	2.4	0	1.9	2.3	4.6	1.3	0.9	0.1	0	0.3	1.7	0	66.5	1.9	27.1
AgB01	3103445	3105169	AgB01_g202_t01	-	980	2	hypothetical protein		Telo	N	Y	Y	0.9	3.8	0.3	0.4	0.2	0	0	0	0.5	0.1	0.4	0	0.1	0.4	0.4	0.4	0.1	0	0	0	0.2	0	9	0.4	4.9
AgB01	3103445	3105169	AgB01_g202_t02	-	678	3	hypothetical protein		Telo	N	N	N	0.9	5.3	0.7	0.1	0.1	0	0	0	0.2	0.1	0	0	0	0.2	0.1	0.1	0	0	0	0	0.2	0	2.4	0.2	1.2
AgB01	3120331	3127036	AgB01_g203_t01	+	1350	2	Dehydrogenase/reductase SDR family member 7B	SL	Telo	N	Y	N	7.5	1.2	1.6	2.8	3.3	7.9	5.3	5.1	1.1	5.4	10.1	12.5	6.9	11.3	16	9.4	16.5	20	21.8	17.7	11.1	10.2	1.5	1.8	2.6
AgB01	3120418	3133127	AgB01_g203_t02	+	3755	4	Dehydrogenase/reductase SDR family member 7B	SL	Telo	N	N	N	5.9	1.1	2.6	4.1	2.5	9.5	7.6	6.7	5.2	8.5	25.7	22.2	12.2	24.4	28	23.8	20.5	34	35.1	27.2	16.3	12.9	4.6	3.3	2.6
AgB01	3127260	3133127	AgB01_g203_t03	+	4763	3	Dehydrogenase/reductase SDR family member 7B	SL		N	N	Y	1.7	0.2	0.8	1.5	0.7	3	2.5	2.1	1.9	3.5	10.9	11.1	6.6	11.6	12	11.8	9.2	15.9	16.9	12.9	7.9	5.8	2.1	1.2	0.9
AgB01	3125900	3159196	AgB01_g204_t01	-	9083	14	Niemann-Pick C1 protein	SL		N	N	N	5.7	1.6	1.7	1.8	1.1	7	5.7	5.9	3.4	4.4	11.9	11.9	7.5	13.3	13.8	13.2	10.6	18.8	21.6	19.4	11.7	7	2.6	1.9	1.4
AgB01	3125900	3160285	AgB01_g204_t02	-	9217	15	Niemann-Pick C1 protein	SL		N	N	N	5.8	1.7	1.7	1.7	1.1	7.1	5.8	6	3.4	4.4	11.8	11.7	7.5	13.2	13.6	13.1	10.5	18.7	21.4	19.4	11.7	6.9	2.5	2	1.4
AgB01	3125900	3161645	AgB01_g204_t03	-	9420	18	Niemann-Pick C1 protein	SL		N	N	N	6.2	1.8	1.7	1.7	1.1	7.4	6	6.3	3.4	4.3	11.6	11.5	7.4	13.1	13.4	13	10.4	18.5	21.2	19.6	11.7	6.8	2.5	2	1.4
AgB01	3125900	3166944	AgB01_g204_t04	-	10071	20	Niemann-Pick C1 protein	SL		N	N	N	6.4	2.2	1.8	1.7	1	7.1	5.8	6.1	3.5	4.5	11.4	11.4	8.9	12.8	12.9	12.5	12.2	17.8	20.9	21.3	12.5	7.4	2.4	1.9	1.4
AgB01	3125900	3167134	AgB01_g204_t05	-	10342	21	Niemann-Pick C1 protein	SL		N	N	N	6.8	2.5	1.9	1.7	1	7.5	6.1	6.4	3.5	4.4	11.2	11.2	8.8	12.7	12.7	12.5	12	17.6	20.8	21.7	12.7	7.2	2.4	2	1.4
AgB01	3125900	3167143	AgB01_g204_t06	-	10351	22	Niemann-Pick C1 protein	SL		N	N	Y	5.6	1.9	1.3	0.9	0.7	6	4.9	5.3	2.5	2.6	6.2	6	4.2	7.4	7.2	6.9	5.6	10.3	12.4	13.5	7.9	4.5	1.5	1.5	0.9
AgB01	3125900	3167923	AgB01_g204_t07	-	9897	21	Niemann-Pick C1 protein	SL		N	N	N	6.7	2	1.7	1.7	1	7.7	6.3	6.5	3.5	4.3	11.5	11.5	7.4	13.1	13.1	12.8	10	18	20.8	19.8	11.9	7.5	2.5	2.1	1.4
AgB01	3125900	3184052	AgB01_g204_t08	-	9921	19	Niemann-Pick C1 protein	SL		N	N	N	6.2	2	1.7	1.6	1	7.1	5.8	6	3.5	4.3	11.4	11.4	7.3	12.8	12.9	12.5	9.8	17.7	20.4	19	11.4	7.5	2.5	2	1.3
AgB01	3125900	3184052	AgB01_g204_t09	-	10002	21	Niemann-Pick C1 protein	SL		N	N	N	6.7	2.2	1.8	1.7	1	7.6	6.2	6.4	3.5	4.3	11.4	11.4	7.4	13	13	12.6	9.9	17.8	20.6	19.7	11.8	7.4	2.5	2.1	1.4
AgB01	3125900	3184086	AgB01_g204_t10	-	10036	22	Niemann-Pick C1 protein	SL		N	N	N	6.7	2.2	1.8	1.7	1	7.6	6.2	6.4	3.5	4.3	11.4	11.3	7.4	13	13	12.6	9.9	17.8	20.6	19.6	11.7	7.4	2.5	2.1	1.4
AgB01	3125900	3186764	AgB01_g204_t11	-	10095	22	Niemann-Pick C1 protein	SL		N	N	N	6.5	2	1.7	1.7	1	7.5	6.2	6.4	3.5	4.3	11.3	11.3	7.3	12.9	12.9	12.8	9.8	17.8	20.7	19.9	11.8	7.4	2.5	2.1	1.4
AgB01	3125900	3186764	AgB01_g204_t12	-	10095	21	Niemann-Pick C1 protein	SL		N	N	N	6.5	2	1.7	1.7	1	7.5	6.2	6.4	3.5	4.3	11.3	11.3	7.3	12.9	12.9	12.8	9.8	17.8	20.7	19.9	11.8	7.4	2.5	2	1.4
AgB01	3133891	3161645	AgB01_g204_t13	-	2067	16	Niemann-Pick C1 protein			N	N	N	17.9	6.6	2.9	0	0.7	17.4	14.9	16.6	4.4	2.1	3.8	3.1	3.2	9.2	5.2	7.6	4.3	8.5	13.7	23	13.6	4.2	2.3	3.1	1.2
AgB01	3140711	3160286	AgB01_g204_t14	-	5683	16	Niemann-Pick C1 protein			N	N	N	7.3	3.1	1.4	0.3	0.3	6.6	6.2	6.8	2.1	2.3	5.1	4.4	4.5	5.9	4.9	5.2	3.1	6	9.8	17.6	10.4	6.4	2.3	2.7	0.8
AgB01	3140711	3166944	AgB01_g204_t15	-	6617	22	Niemann-Pick C1 protein			N	Y	N	8.2	3.4	1.4	0.3	0.3	7.3	6.7	7.1	2.3	2.4	5.2	4.6	4.6	6.3	4.8	5.4	3	6.1	9.9	18	10.5	7.1	2.2	2.7	0.9
AgB01	3140711	3167933	AgB01_g204_t16	-	6372	23	Niemann-Pick C1 protein			N	N	N	8.5	3.5	1.5	0.3	0.3	7.6	6.9	7.4	2.3	2.4	5.3	4.7	4.7	6.5	5	5.6	3.1	6.3	10.2	18.4	10.8	7.3	2.2	2.8	0.9
AgB01	3140711	3184052	AgB01_g204_t17	-	6467	23	Niemann-Pick C1 protein			N	N	N	8.5	3.8	1.5	0.3	0.3	7.5	6.8	7.3	2.3	2.4	5.2	4.7	4.7	6.4	5	5.5	3.1	6.3	10.1	18.3	10.7	7.2	2.2	2.8	0.9
AgB01	3185904	3186764	AgB01_g204_t18	-	362	2	hypothetical protein	SL		N	N	N	0	0.1	0	0	0	0	0	0	0	0.4	1.9	1.2	0.1	2.2	2.7	6.5	2.3	3.4	6.9	13.4	4.3	0	2.6	0.6	0.4
AgB01	3166321	3186934	AgB01_g205_t01	.	20614	1	hypothetical protein	SL		N	Y	Y	1.4	6.5	0.6	0	0.1	0	0	0	0	0	0.1	0.1	0	0.1	0.2	0.3	0.3	0.7	1.1	2.7	1.9	0.2	0.1	0	0
AgB01	3186174	3186447	AgB01_g205_t02	.	274	1	hypothetical protein			N	N	N	0	0	0	0	0	0	0	0	0	0	0	0	0	0	0.2	0.1	2.2	0.7	1.9	1.3	1.1	0	0	0	0
AgB01	3197634	3200924	AgB01_g206_t01	-	1076	5	nematode cuticle collagen domain-containing protein			N	N	N	0.1	0.8	0.2	0	0	0	0	0	0	0	0	0.4	0	0.2	0.5	0.2	0.1	0	0	0.6	0.6	0	0	0	0
AgB01	3197634	3201721	AgB01_g206_t02	-	1130	5	nematode cuticle collagen domain-containing protein			N	Y	Y	0.1	1.1	0.2	0	0	0	0	0	0	0	0	0.2	0	0.2	0.4	0.2	0	0	0	0.6	1	0	0	0	0
AgB01	3205644	3208378	AgB01_g207_t01	+	502	3	kynureninase	SL		N	N	Y	0.4	0.3	2.6	1.2	2.3	0.3	0.9	0.7	3.5	4.5	12.5	14.9	20.4	14.7	6.6	6.2	5.1	1	0.7	2.7	2.1	0	2.4	2.1	1.2
AgB01	3207906	3208378	AgB01_g207_t02	+	473	1	kynureninase	SL		N	Y	N	0.5	0.8	2.2	0.8	2	0.6	0.8	0.9	4.9	4.4	16.8	16.5	22.6	19	13.3	11.6	11.2	1.2	0.3	2.7	2.4	0	0.8	1.4	0.7
AgB01	3209720	3219168	AgB01_g208_t01	+	2232	10	Kynureninase	SL		N	Y	Y	1.6	0.8	3.5	2.3	3	3.7	3.6	4.3	6.3	3.9	10.9	6.7	7.3	15.2	16.1	18	7.6	7.9	2.2	5.2	10.5	0.8	15.1	12.3	5.6
AgB01	3210275	3219168	AgB01_g208_t02	+	2184	10	Kynureninase			N	N	N	2.7	1.2	5.6	3.9	4.8	5.4	5.5	6.4	9.7	5.5	14.9	10	9.9	21	21.4	25.6	10.7	10.8	2.7	6.9	13.5	1.6	24.7	19.9	7.9
AgB01	3217983	3224181	AgB01_g209_t01	-	2529	8	Kynureninase	SL		N	N	N	5.3	1.6	6.8	9	13.7	7.2	6.3	7.2	17.1	9.5	17.1	12.4	10.2	19.3	14.4	18.6	9.6	9.4	8.5	8.6	8.9	4.1	57.1	52.7	14
AgB01	3217983	3224285	AgB01_g209_t02	-	2660	8	Kynureninase	SL		N	Y	Y	4.5	1.5	6	8.2	12.3	6.7	5.9	6.3	14.9	8.4	14.3	10.8	9.2	17.6	11.9	15.7	7.8	8.3	7.8	7.8	7.7	3.2	49.9	46.4	12.2
AgB01	3221054	3224181	AgB01_g209_t03	-	1543	3	Ubiquinone/menaquinone biosynthesis methyltransferase ubiE	SL		N	N	N	3	1.3	5.4	6.8	9.1	6.8	5.2	5.6	10.4	7.9	13.8	10.4	7.4	17.9	11.5	14.5	8	7.1	8	6.3	6.1	3.4	43.6	41.6	11.7
AgB01	3226151	3238808	AgB01_g210_t01	-	5444	11	Cell division protein kinase 9	SL		N	N	N	7.6	9.1	2	0.3	1.5	3.2	2.1	2.4	1.7	1.6	7.5	6	5.1	10	13.9	14.1	7.8	10.3	7.4	8.2	5.8	4.8	1.9	0.9	0.8
AgB01	3226151	3238922	AgB01_g210_t02	-	5582	11	Cell division protein kinase 9	SL		N	N	N	7.5	8.9	1.9	0.3	1.4	3.1	2	2.3	1.6	1.6	7.3	5.9	5	9.8	13.5	13.8	7.6	10.1	7.2	8	5.7	4.6	1.9	0.8	0.7
AgB01	3226151	3238922	AgB01_g210_t03	-	5801	10	Cell division protein kinase 9	SL		N	N	Y	7.3	8.7	1.9	0.2	1.4	3.1	1.9	2.2	1.6	1.6	7.2	5.8	5	9.5	13.2	13.4	7.5	9.8	7.1	7.8	5.5	4.8	1.8	0.8	0.7
AgB01	3226151	3239823	AgB01_g210_t04	-	3785	11	Cell division protein kinase 9	SL		N	Y	N	9.1	11	1.9	0.3	1.3	4.3	2.9	3.3	2.3	2.4	10.8	8.6	7.3	14.4	19.9	20.3	11	14.7	10.6	11.7	8.2	6.4	2.8	1.3	1.1
AgB01	3240979	3245901	AgB01_g211_t01	-	1276	4	hypothetical protein			N	Y	Y	7.6	50.4	12	0.4	2.7	0	0	0	0	0	0	0.1	0	0.2	0.2	0.1	0	0.1	0	0	0	0	0.2	0	0.1
AgB01	3250696	3255836	AgB01_g212_t01	-	1908	3	Cuticle collagen 12			N	N	N	0.1	0	7	0	0	0	0	0	0.1	0	0.2	0.2	0	0.2	0.1	0.2	0.1	0.4	0	0.1	1.5	0	0.4	0.6	0
AgB01	3250696	3257621	AgB01_g212_t02	-	1406	3	Cuticle collagen 12			N	N	N	0.1	0	7.1	0	0.3	0.1	0	0	0.1	0.1	0.1	0.1	0	0.1	0.2	0.3	0.2	0.3	0	0	1.5	0	3.3	0.7	0
AgB01	3250696	3257621	AgB01_g212_t03	-	1877	5	Cuticle collagen 12			N	N	N	0	0	7.5	0.1	0.3	0.1	0	0	0.1	0.1	0.1	0.2	0	0.2	0.2	0.3	0.1	0.4	0	0.1	1.5	0	4.2	0.9	0
AgB01	3250696	3258098	AgB01_g212_t04	-	2382	5	Cuticle collagen 12			N	Y	Y	0	0	6.5	0.1	0.3	0.1	0	0	0	0.1	0.1	0.2	0	0.1	0.2	0.2	0.1	0.3	0	0.1	1.2	0	3.2	0.7	0
AgB01	3256355	3257610	AgB01_g212_t05	-	1092	2	hypothetical protein			N	N	N	0	0	1.7	0	0.5	0	0	0.1	0	0.2	0.1	0	0.3	0	0.2	0.2	0.3	0.7	0.2	0	0.8	0	8.3	0.9	0
AgB01	3256355	3257621	AgB01_g212_t06	-	989	2	hypothetical protein			N	N	N	0	0	1.5	0	0.6	0	0	0.1	0	0.2	0.1	0	0.4	0	0.3	0.2	0.3	0.7	0.2	0	0.9	0	10	0.9	0
AgB01	3279411	3279822	AgB01_g213_t01	.	412	1	hypothetical protein			N	Y	Y	0.5	0	1.9	0	0	0	0	0	0	0	0.1	0	0	0	0	0	0	0	0	0	0	0	0	0	0
AgB01	3285226	3285956	AgB01_g214_t01	+	354	3	hypothetical protein			N	Y	Y	0.2	0	1.7	0	0	0	0	0	0.3	0.1	0	0	0	0	0	0	0	0	0	0	0	0	0.8	0.1	0.4
AgB01	3332268	3358967	AgB01_g215_t01	+	8132	13	cbn-moma-1 protein	SL	Telo	N	Y	Y	4.2	1.2	10.6	5.7	4	2.6	4.1	3.9	3.1	1.7	1.8	1.7	1.4	2.6	3.3	2.2	1.4	1.8	1.8	3.1	3.3	2.8	5.2	6.7	6.3
AgB01	3332289	3332842	AgB01_g215_t02	+	554	1	hypothetical protein	SL		N	N	N	0.9	1.3	22.1	0	2.8	1.2	3.8	4.9	3.6	1.9	2.4	1	2.2	3.5	2.2	2.1	1.1	0.1	1.3	2.3	2.6	0	6.6	9	4.8
AgB01	3338570	3358967	AgB01_g215_t03	+	7431	9	cbn-moma-1 protein		Telo	N	N	N	9.9	1.8	8.5	6.1	5.1	5.3	6.7	6	3.5	3.3	3.6	3.2	2	3.2	6.2	3.8	2.4	3.3	3.4	5.2	5.2	4.2	7.9	9.7	9.6
AgB01	3341684	3342070	AgB01_g215_t04	+	387	1	hypothetical protein			N	N	N	0.8	0.3	6.1	1.8	0.2	0.3	0.6	1	3.7	0.1	0	0.1	0	0.5	0.5	0.5	0	0.3	0.4	0.8	0.6	0	0.9	1.1	1.4
AgB01	3344748	3345376	AgB01_g215_t05	+	629	1	hypothetical protein			N	N	N	1	0.8	8.8	2.3	1	0.4	1.5	1	0.9	0.1	0.5	0.2	0	0.7	0.9	0.9	0.2	0.4	0.5	1.8	1.4	0	1.3	1.7	1.5
AgB01	3349639	3350307	AgB01_g215_t06	+	669	1	hypothetical protein			N	N	N	0.5	0.7	10.9	5.3	4.8	1.4	1.8	1.1	0.7	2.9	1.6	1.2	1.5	1.8	2.2	1.5	0.4	0.9	1.1	2.6	2.9	2.6	2.2	4	4.3
AgB01	3352403	3363788	AgB01_g216_t01	-	6506	7	cbn-moma-1 protein	SL	Telo	N	Y	Y	27	3.4	5	9.1	6.4	14.4	14.3	12.8	4.4	4.8	7.4	5.9	2.9	4	5.9	4.8	3.3	4.9	5.6	5.6	5.4	7.7	9.6	9.9	11.5
AgB01	3365292	3382342	AgB01_g217_t01	+	3817	10	histone acetyltransferase kat8			N	N	N	17.8	2	1.7	0.7	2.4	11.3	6.5	6.4	1.9	1.1	10.2	9.6	9	10.5	17.8	16.8	17	20	14.3	11.6	6.6	5.9	2	0.4	1.4
AgB01	3365292	3382342	AgB01_g217_t02	+	3120	11	Histone acetyltransferase MYST1			N	Y	N	21.3	2.2	2.1	0.9	3	13.8	7.9	7.8	2.2	1.4	12.3	11.8	10.9	12.7	21.7	20.3	20.5	24.2	17.5	14.1	8	7.8	2.4	0.5	1.7
AgB01	3365292	3382342	AgB01_g217_t03	+	2518	12	histone acetyltransferase kat8			N	N	N	26.2	2.7	2.6	1	3.7	17	9.7	9.6	2.8	1.7	14.4	14.1	13.3	14.6	24.7	23.3	24.8	28.1	19.6	16.4	9.3	6.9	2.7	0.6	2
AgB01	3365292	3382342	AgB01_g217_t04	+	3823	10	Histone acetyltransferase MYST1			N	N	Y	17.8	2	1.7	0.7	2.4	11.3	6.4	6.4	1.8	1.1	10.2	9.7	8.9	10.5	17.7	16.7	16.8	19.9	14.4	11.5	6.6	6.3	2	0.4	1.4
AgB01	3365292	3383784	AgB01_g217_t05	+	2731	12	histone acetyltransferase kat8			N	N	N	21.1	2.3	3.1	6.1	4.5	15.2	8.8	8.6	2.5	1.4	10.6	11.5	11.2	13.1	20.2	19.7	19.8	22.1	15.3	12.5	7	7	1.7	0.4	1.7
AgB01	3365315	3383784	AgB01_g217_t06	+	2702	12	histone acetyltransferase kat8			N	N	N	21.3	2.3	3.1	6.2	4.5	15.4	8.9	8.7	2.5	1.5	10.6	11.5	11.4	13.2	20.5	20	20.3	22.4	15.3	12.7	7.1	6.4	1.8	0.4	1.7
AgB01	3365315	3383784	AgB01_g217_t07	+	2702	12	histone acetyltransferase kat8			N	N	N	21.3	2.3	3.1	6.2	4.5	15.4	8.9	8.7	2.5	1.5	10.6	11.5	11.4	13.2	20.5	20	20.3	22.4	15.3	12.7	7.1	6.4	1.8	0.4	1.7
AgB01	3365343	3382342	AgB01_g217_t08	+	2473	12	histone acetyltransferase kat8			N	N	N	26.7	2.8	2.7	1.1	3.7	17.3	10	9.8	2.9	1.7	14.6	14.4	13.7	15.1	25.2	23.8	25.5	28.7	20.2	16.7	9.5	7	2.7	0.6	2.1
AgB01	3365358	3382342	AgB01_g217_t09	+	3054	11	Histone acetyltransferase MYST1			N	N	N	21.7	2.3	2.2	0.9	3	14.1	8.1	8	2.3	1.4	12.6	12	11.1	13	22.1	20.8	20.9	24.7	17.9	14.4	8.1	7.9	2.5	0.5	1.7
AgB01	3365358	3382342	AgB01_g217_t10	+	2464	12	Histone acetyltransferase MYST1			N	N	N	26.8	2.8	2.7	0	3.7	17.4	10	9.8	2.8	1.7	14.7	14.6	13.7	15.2	25.2	23.8	25.3	28.6	20.4	16.7	9.5	7.7	2.7	0.6	2.1
AgB01	3365358	3382342	AgB01_g217_t11	+	3048	11	histone acetyltransferase kat8			N	N	N	21.8	2.3	2.2	0.9	3	14.1	8.1	8	2.3	1.4	12.5	11.9	11.2	13	22.2	20.9	21.2	24.9	17.8	14.5	8.2	7.4	2.5	0.5	1.7
AgB01	3365994	3382342	AgB01_g217_t12	+	2525	11	Histone acetyltransferase MYST1			N	N	N	26.1	2.8	2.6	1	3.6	16.9	9.7	9.5	2.8	1.7	14.5	14.3	13.1	14.7	24.5	23.2	24.5	28	19.8	16.3	9.4	7.5	2.7	0.6	2
AgB01	3365994	3382342	AgB01_g217_t13	+	2519	11	histone acetyltransferase kat8			N	N	N	26.2	2.8	2.6	1	3.6	17	9.7	9.6	2.8	1.7	14.4	14.2	13.3	14.7	24.7	23.4	24.8	28.3	19.7	16.5	9.4	6.9	2.7	0.6	2
AgB01	3365994	3382342	AgB01_g217_t14	+	2531	11	Histone acetyltransferase MYST1			N	N	N	26.1	2.8	2.6	1	3.6	16.9	9.7	9.5	2.7	1.7	14.5	14.4	13.3	14.9	24.6	23.2	24.6	28	20	16.3	9.3	7.5	2.7	0.6	2
AgB01	3412063	3434229	AgB01_g218_t01	+	7181	13	disintegrin and metalloproteinase domain-containing protein 24	SL		N	Y	Y	0.6	1.3	0.6	1	1.1	0.1	0.2	0.2	0.4	0.4	2.3	2.4	3.6	3.6	4.8	4.1	3.5	3.6	6.3	5.8	6.9	0.5	1.2	2.2	0.2
AgB01	3412063	3434229	AgB01_g218_t02	+	7181	13	disintegrin and metalloproteinase domain-containing protein 24	SL		N	N	N	0.7	1.6	0.7	1	1.2	0.1	0.2	0.2	0.4	0.4	2.3	2.4	3.6	3.7	5	4.3	3.7	4	6.7	6.2	7.3	0.5	1.3	2.3	0.2
AgB01	3420383	3421072	AgB01_g218_t03	+	690	1	hypothetical protein			N	N	N	0.1	0	0	0.7	0.3	0	0	0	0	0.1	0	0.2	0	0.5	1.2	0.9	0.1	1.2	2.9	2	2.3	0	0	0.1	0
AgB01	3425189	3434229	AgB01_g218_t04	+	6099	5	hypothetical protein			N	N	N	0.8	1.9	0.3	0.5	0.5	0.1	0.2	0.2	0.4	0.4	2.6	2.5	3.8	3.7	4	3.3	2.7	3.3	4.8	4.5	5.6	0.6	1.4	2.6	0.2
AgB01	3429178	3437048	AgB01_g219_t01	-	5926	4	Transcription factor Adf-1	SL		N	Y	Y	1.5	3.1	0.2	0.1	0.2	0.3	0.2	0.2	0.3	0.4	1.2	0.8	0.6	1.4	2.8	1.5	1.2	2.7	3.4	3.6	4.3	1.2	0.9	1.6	0.1
AgB01	3429178	3437048	AgB01_g219_t02	-	4719	5	Transcription factor Adf-1	SL		N	N	N	1.8	3.4	0.3	0.1	0.2	0.4	0.3	0.2	0.4	0.4	1.4	1	0.7	1.6	3.2	1.7	1.2	2.7	3.8	3.9	4.8	1.5	1	1.9	0.1
AgB01	3429178	3437267	AgB01_g219_t03	-	5524	5	Transcription factor Adf-1	SL		N	N	N	2.4	4.8	0.4	0.1	0.5	0.4	0.3	0.3	0.4	0.6	2.5	1.4	1.1	2.7	5	2.7	1.9	4.5	6.1	6	7.7	1.9	1.8	3.3	0.2
AgB01	3429178	3437267	AgB01_g219_t04	-	4317	6	Transcription factor Adf-1	SL		N	N	N	1.9	3.6	0.3	0.1	0.3	0.4	0.3	0.3	0.4	0.4	1.5	1.1	0.8	1.8	3.5	1.8	1.3	2.8	4.1	4.2	5.2	1.6	1.1	2.1	0.1
AgB01	3443169	3446937	AgB01_g220_t01	-	999	3	hypothetical protein			N	Y	Y	0.2	0	0.2	0	0	0.1	0	0.1	0.1	0.3	2.2	1.2	1.7	1.4	0.8	0.9	0	0	0	0.1	0	0	0.5	3.1	0
AgB01	3448246	3450980	AgB01_g221_t01	-	1438	4	DnaJ subfamily C member 8, partial			N	N	N	5.3	1.2	1.2	0.5	1.1	6.3	6	5.1	3.1	11	37	36.7	42.2	23.2	27.3	25.8	28.2	26.2	29.3	26.7	14.6	12	9.7	3	4.6
AgB01	3448246	3455802	AgB01_g221_t02	-	2444	8	DnaJ subfamily C member 8, partial	SL		N	N	Y	7.3	1.8	2.5	0.9	1.9	10	8.4	7.5	4.3	9.1	29.2	28.2	33.2	23.8	24	24.6	23.8	26.7	29.1	24.9	14.9	9.2	8.1	2.3	4
AgB01	3448246	3456153	AgB01_g221_t03	-	2063	9	DnaJ subfamily C member 8, partial	SL		N	Y	N	8.7	2.2	3	1	2.3	12.4	10.5	9.2	5.2	11.1	35.4	33.7	40.7	29.2	28.9	30.2	28.5	30.8	34	28.6	17.1	10.1	9.6	2.8	4.8
AgB01	3448246	3457011	AgB01_g221_t04	-	1728	10	DnaJ subfamily C member 8, partial	SL		N	N	N	10.2	2.7	3.5	1.2	2.7	14.8	12.5	10.9	6.1	13.3	42.2	40.2	48.6	35	34.3	36	33.9	36.7	40.3	34	20.3	12	11.5	3.3	5.8
AgB01	3448246	3457011	AgB01_g221_t05	-	1165	11	DnaJ subfamily C member 8, partial	SL		N	N	N	14.9	3.8	4.9	1.7	4	21.3	18.3	15.9	8.9	18.7	54.8	56.7	70.4	47.2	41.9	47	46.5	43.6	48.8	41.3	23.5	11.9	12.2	3.5	6.8
AgB01	3451345	3455802	AgB01_g221_t06	-	913	5	DnaJ subfamily C member 8, partial	SL		N	N	N	11	3.2	4.6	1.5	3.4	17.7	13.6	12.3	6.9	7.2	20.1	15.4	23.6	27.9	22.3	26.8	19.2	28.5	32.5	24.5	16.5	3.8	6.3	1.6	3.6
AgB01	3462095	3465269	AgB01_g222_t01	-	207	2	hypothetical protein	SL		N	Y	Y	31.8	2.2	12.2	12.4	9	30.7	25.3	23.3	6.9	27.9	44.6	56.4	48.5	24.4	30.5	31.1	36.6	48.5	53.2	35.1	14.7	33.4	30.1	32.6	51.2
AgB01	3491042	3505149	AgB01_g223_t01	+	3317	14	g in family member (glb-33)			N	N	Y	0	0.5	0.1	0	0	1.5	3	3.3	4.2	2.2	17.7	14.1	9.7	26.9	17.6	9.6	2.5	1.8	1	0.7	1.4	1.6	0.6	0.1	0
AgB01	3491042	3505149	AgB01_g223_t02	+	3194	13	g in family member (glb-33)			N	N	N	0	0.5	0.1	0	0	1.4	2.7	3	4	2.2	17.7	14.3	9.8	26.7	17.2	9.4	2.4	1.8	1	0.7	1.4	1.6	0.6	0.1	0
AgB01	3491071	3505149	AgB01_g223_t03	+	2540	13	g in family member (glb-33)			N	N	N	0.1	0.6	0.1	0	0	1.6	3.3	3.8	4.8	2.4	17.7	15.9	11.3	29.7	18.2	10.2	2.6	1.7	1	0.7	1.4	1.4	0.5	0.1	0
AgB01	3491072	3505149	AgB01_g223_t04	+	3294	14	g in family member (glb-33)			N	Y	N	0	0.5	0.1	0	0	1.5	3.1	3.3	4.2	2.1	17.6	13.8	9.7	26.6	17.6	9.6	2.5	1.8	1	0.7	1.4	1	0.6	0.1	0
AgB01	3499048	3499761	AgB01_g223_t05	+	714	1	g in family member (glb-33)			N	N	N	0.1	0.2	0	0	0	0.6	0.7	0.9	0.6	0.5	3.5	2.7	1.3	9.1	4.7	4.7	1.3	1.2	0.7	0.3	1	0	0.2	0	0
AgB01	3500621	3501016	AgB01_g223_t06	+	396	1	g in family member (glb-33)			N	N	N	0.1	0.2	0.1	0	0	0.8	1	1.2	0.3	0.7	5.1	2.9	3.5	10.8	4	2.4	1.1	1.3	0.4	0.6	1	4.4	0.6	0	0
AgB01	3508100	3508428	AgB01_g224_t01	.	329	1	hypothetical protein			N	Y	Y	0.6	0.3	0	0	0	0.3	0	0	6.4	0.1	0.1	0	0.2	0	0.3	0.2	0	1.8	0.9	1.2	1.2	5.3	0.3	0	0
AgB01	3511861	3515589	AgB01_g225_t01	+	706	6	immunodominant antigen ov33-3			N	N	N	0.1	0	0	0	0	0	0	0	0	0	0.1	0.2	0	0.5	1.2	0.6	0.4	0.1	0	1.2	1.5	0	0.1	0	0
AgB01	3511861	3515589	AgB01_g225_t02	+	862	7	immunodominant antigen ov33-3			N	Y	Y	0.1	0	0	0	0	0	0	0	0	0	0.1	0.2	0	0.4	0.9	0.6	0.1	0	0	1	1.1	0	0.1	0	0
AgB01	3520237	3540490	AgB01_g226_t01	-	5554	24	Kinesin-like protein KIF11			N	N	N	15.4	11.1	1.2	0.1	1.5	18.2	13.6	14.1	1.7	1.7	8.3	9.6	10.9	13.5	28.8	22.9	20.9	31.5	51.5	33.4	13.1	0.6	1.1	0.3	0
AgB01	3520237	3540490	AgB01_g226_t02	-	5746	25	Kinesin-like protein KIF11			N	N	N	16.3	11.8	1.4	0.2	1.8	19.7	14.5	15	1.8	1.7	8.6	10	12	14.1	30.1	24.2	22.9	33	54.1	35	13.9	0.9	1.1	0.3	0
AgB01	3520237	3540490	AgB01_g226_t03	-	5747	25	Kinesin-like protein KIF11			N	N	N	16.3	11.8	1.4	0	1.8	19.7	14.5	15	1.8	1.7	8.6	10	11.9	14	30	24	22.7	32.7	53.6	34.8	13.8	0.9	1.1	0.3	0
AgB01	3520237	3540490	AgB01_g226_t04	-	5816	26	Kinesin-like protein KIF11			N	N	N	16	11.6	1.3	0.2	1.7	19.2	14.1	14.6	1.8	1.7	8.5	9.8	11.6	13.8	29.5	23.7	22.4	32.4	53	34.4	13.6	0.6	1.1	0.3	0
AgB01	3520237	3540555	AgB01_g226_t05	-	6739	24	Kinesin-like protein KIF11			N	N	Y	13.7	9.8	1.1	0.2	1.5	16.2	12.1	12.5	1.5	1.5	7.2	8.3	10.1	11.7	25.1	20.1	19	27.5	44.8	29.1	11.6	0.8	1	0.2	0
AgB01	3520237	3540555	AgB01_g226_t06	-	4674	26	Kinesin-like protein KIF11			N	Y	N	19.6	14.1	1.7	0.3	2.1	23.3	17.3	17.9	2.2	2.1	9.6	10.5	13.5	15	34.9	28.3	26.9	39.3	64.2	41.7	16.6	1.1	1.3	0.3	0
AgB01	3524027	3525374	AgB01_g226_t07	-	589	2	kinesin-like protein kif11-a			N	N	N	14.8	8.6	0.8	0	1	10.8	11.8	11.1	0.4	0.4	0.9	1.6	1.7	3.9	8.5	8.8	5.8	9.6	16	11.2	6.9	0	0.2	0.1	0
AgB01	3527304	3529594	AgB01_g226_t08	-	1668	3	Kinesin-like protein KIF11			N	N	N	11.1	8.5	1.1	0.3	2.6	15.6	10.4	10.5	1.3	1.1	5.9	6.3	12.2	9.8	20.6	19.7	23.3	21.1	35.6	26.9	9.5	2.1	0.4	0.1	0
AgB01	3527304	3531884	AgB01_g226_t09	-	1405	8	Kinesin-like protein KIF11			N	N	N	21.7	15.9	2.3	0.3	3.2	30.1	19.5	19.9	1.8	1.9	9.5	10.9	17.5	17.2	37.9	35.1	37.3	39.4	64.2	44.4	16.1	2.5	0.8	0.3	0
AgB01	3535893	3537167	AgB01_g227_t01	+	347	2	Kinesin-like protein KIF11			N	Y	Y	7.9	6.3	0.6	0.2	0.6	13.8	7.3	7.6	0.6	0	2.3	3.5	3.4	6.2	11.8	10.1	11	13.9	25.5	14	4.1	0	0.3	0	0
AgB01	3543443	3547631	AgB01_g228_t01	+	2186	5	Tau-tubulin kinase 1, partial	SL	Telo	N	N	Y	105.6	296.8	128.8	1.7	16.8	0.4	0.5	0.6	2.7	1.5	2.3	1.5	2	2.6	6.3	7.4	7.8	2.8	1.1	0.1	0.5	0	1.4	0	0.2
AgB01	3543485	3547631	AgB01_g228_t02	+	1474	5	Tau-tubulin kinase 1, partial	SL	Telo	N	Y	N	142.6	382.3	164.9	2	22.8	0.6	0.7	0.8	3.8	2	2.9	2.2	2.7	3.7	8	9.8	10.2	3.8	1.6	0.2	0.7	0	2	0.1	0.3
AgB01	3543485	3547631	AgB01_g228_t03	+	1615	6	Tau-tubulin kinase 1, partial	SL	Telo	N	N	N	180.1	525.6	225.4	3.1	29.4	0.7	0.9	1	4.2	3.3	3.3	2.6	3.7	4.2	10.5	13.4	12.2	4.9	1.9	0.2	0.7	0	2.3	0.1	0.4
AgB01	3543555	3547631	AgB01_g228_t04	+	1889	5	Tau-tubulin kinase 1, partial	SL	Telo	N	N	N	156.8	448.6	191	2.7	25.1	0.6	0.8	0.8	3.6	2.9	2.8	2.3	3.4	3.7	9	11.4	10.3	4.2	1.6	0.2	0.6	0	2	0.1	0.3
AgB01	3543943	3545929	AgB01_g228_t05	+	1987	1	Tau-tubulin kinase 1	SL		N	N	N	85.1	265.1	109.5	1.9	13.6	0.2	0.5	0.4	1.3	2.1	1.7	1.6	2.1	2.2	5.8	7.1	4.8	2.6	1	0.1	0.2	0	1	0	0.2
AgB01	3544115	3545864	AgB01_g229_t01	-	618	2	Tau-tubulin kinase 1, partial	SL		N	Y	Y	105.4	329.1	136.5	2.3	18.8	0.4	0.8	0.7	1.4	3.8	1.2	1.9	3.2	2.2	6.5	10.1	5.6	3.5	1.2	0.2	0.2	0	1.1	0	0.2
AgB01	3548530	3553789	AgB01_g230_t01	+	2156	6	hypothetical protein			N	N	N	16.2	2.9	1.4	1.3	3.7	27.8	17	16.9	3.3	1.5	14.6	17.6	16.9	25.9	31.7	29.8	20.2	36.2	46.3	24.9	11.5	0.8	1.1	0.9	0.3
AgB01	3548544	3551170	AgB01_g230_t02	+	743	4	hypothetical protein			N	N	N	20.1	3.6	2.1	1.5	4.9	37.2	20.7	21.8	4.2	3.4	31.3	39.5	36.1	44.4	63.9	52.8	35.8	61.5	84.7	44.8	19	2.3	1.6	1.9	0.6
AgB01	3548544	3553789	AgB01_g230_t03	+	2467	5	hypothetical protein			N	N	Y	13.8	2.5	1.2	1.1	3.2	23.6	14.5	14.2	2.6	1.3	12.5	15.3	14.5	22.4	27.5	25.7	17.3	31.2	40.3	21.5	10	0.7	0.9	0.8	0.2
AgB01	3548561	3553789	AgB01_g230_t04	+	1883	7	hypothetical protein			N	Y	N	18.3	3.2	1.6	1.5	4.3	31.8	19.5	19.3	3.8	1.8	16.6	19.9	19.3	29.4	35.9	33.8	23	40.8	52.3	28	12.6	0.9	1.2	1	0.3
AgB01	3553915	3561046	AgB01_g231_t01	+	2073	6	hypothetical protein			N	Y	Y	22.4	2.1	0.8	1.7	4.2	23.7	23.7	23.1	2.6	1.7	17	14.1	17.6	32.1	32.4	38.9	33.6	42.2	51.2	33.1	12	0.8	2	1.2	0.5
AgB01	3561481	3563308	AgB01_g232_t01	+	1828	1	hypothetical protein			N	Y	Y	5.6	0.8	0.2	0.1	0.3	2.3	1.7	1.7	0.7	2	31.3	17.4	16	19	40.9	25.8	30.3	33.2	43.7	24.9	11.2	0.9	2.9	0.5	0.3
AgB01	3563576	3594195	AgB01_g233_t01	-	30052	2	Glutamine-dependent NAD(+) synthetase	SL	Telo	N	N	N	18.8	9.1	57.3	27.1	30.3	14.3	6	5.7	39.6	250.1	20.1	40.1	60.8	65.8	55.6	32.6	32.7	104	143.5	257.5	449	1382	208.6	372.7	1716.7
AgB01	3563576	3594203	AgB01_g233_t02	-	29941	2	Glutamine-dependent NAD(+) synthetase	SL	Telo	N	N	N	19.2	9.4	58.1	27.2	31	14.4	6	5.7	40.3	246.8	20	39.9	60.7	65.3	55	32.2	32.6	102.6	141.7	254.4	440.6	1377	205.4	365.8	1677.5
AgB01	3563576	3594237	AgB01_g233_t03	-	30548	2	Glutamine-dependent NAD(+) synthetase	SL	Telo	N	N	Y	11.4	5.1	31.9	14	16.5	8.2	3.4	3.3	21.9	130.4	11.5	21.7	34.2	40	31.8	18.3	19	65.7	89	158.2	268.1	712.6	105.4	189.5	885.9
AgB01	3563576	3594260	AgB01_g233_t04	-	29651	2	Glutamine-dependent NAD(+) synthetase	SL	Telo	N	N	N	16.8	8.4	51.6	24.4	28.1	12.7	5.4	5.1	35.5	253.6	20.4	40.5	61.9	66.6	55.9	32.9	33.1	103.2	143.2	258.3	450.2	1403.9	211.3	378.3	1733.8
AgB01	3563576	3594260	AgB01_g233_t05	-	29501	3	Glutamine-dependent NAD(+) synthetase	SL	Telo	N	Y	N	11.3	5.1	32.9	15.2	17.7	8.1	3.5	3.5	23	136.6	11.9	22.3	35.5	41.2	32.6	18.7	19.4	66.7	89.7	160	275.8	763.1	113.1	201.9	940.2
AgB01	3564111	3594281	AgB01_g234_t01	+	22646	2	Glutamine-dependent NAD(+) synthetase	SL	Telo	N	Y	Y	10.5	5.9	35.5	17.7	19.1	8.2	3.5	3.2	24.4	165.5	11.8	24.8	35.9	34.7	32	18.9	18.1	51.1	72.7	132.7	243.2	905.1	137.5	246.9	1132.9
AgB01	3594496	3597151	AgB01_g235_t01	.	2656	1	hypothetical protein			N	Y	Y	0.5	0	0.1	0.3	0.3	0.1	0	0	0.2	0.2	1.6	1.4	0.5	4.3	2.1	1.5	0.9	2.1	0.8	0.6	2.2	2	4.7	2.6	20.9
AgB01	3609743	3616447	AgB01_g236_t01	.	6705	1	hypothetical protein			N	Y	Y	0.9	1.2	0.3	0.2	0.2	0.2	0.2	0.1	0.1	0.2	0.5	0.3	0.2	0.4	0.6	0.3	0.6	2.2	4.7	5.4	2	4.1	0.6	0.4	0.5
AgB01	3611762	3614828	AgB01_g237_t01	-	2285	2	hypothetical protein			N	N	N	1.4	1.1	0.6	0.2	0.1	0.4	0.3	0.3	0	0.4	0.8	0.8	0.4	1.1	1.3	1	2.3	6.5	13.8	18.7	5.8	13.6	1.2	1.2	0.4
AgB01	3611762	3616477	AgB01_g237_t02	-	2534	3	hypothetical protein			N	N	N	1.7	1.1	0.6	0.2	0.1	0.7	0.5	0.3	0	0.8	1.8	1.5	0.8	1.9	2	1.3	2.2	6.5	14.1	18.4	6.3	14.3	2.3	1.6	2
AgB01	3611762	3616520	AgB01_g237_t03	-	4002	2	hypothetical protein			N	Y	Y	1.5	0.9	0.4	0.1	0.1	0.4	0.4	0.3	0.3	0.4	0.9	0.8	0.3	1.1	1	0.7	0.9	3.6	7.6	9.7	3.4	6	1	0.8	1
AgB01	3616594	3639239	AgB01_g238_t01	+	21235	2	hypothetical protein			N	N	N	24	89.9	26.4	3.1	9.4	6.6	3.2	3.3	7.3	67.5	8.8	11.7	12.3	16.5	128.8	61.3	56.3	84.7	73.5	72.7	75.3	157.2	66.6	112.5	128.2
AgB01	3616629	3639239	AgB01_g238_t02	+	19823	4	hypothetical protein			N	N	N	25.4	91.9	26.8	3.2	9.2	6.8	3.3	3.4	7.1	58.2	7.6	10.1	10.4	13.4	123.7	47.5	50.3	76.7	66.1	65.3	65.8	137	56.2	92.8	106
AgB01	3616664	3639239	AgB01_g238_t03	+	22121	2	hypothetical protein			N	N	Y	14.7	56	16.6	1.9	5.8	4.1	2.1	2.1	4.3	47.5	5.7	7.5	7.8	10.9	98.9	42.1	40.4	62	53.1	51.7	53.5	110.3	43.9	71.8	85.2
AgB01	3616705	3639239	AgB01_g238_t04	+	14580	2	hypothetical protein			N	Y	N	11.1	46.6	14.9	1.8	5.6	3.6	2	2	3.8	59.4	7.6	9.6	9.6	14.7	112.6	61.4	49.8	74.1	63	61.7	66.9	145.7	59.2	95.6	113.4
AgB01	3616705	3639239	AgB01_g238_t05	+	3787	3	hypothetical protein			N	N	N	28.7	99.2	30.1	4.5	11.4	9.1	5	5.8	11.7	73.2	14.4	18.8	17	24.9	103.4	70.7	54.4	66.6	61.5	69.2	71.4	173.5	99.8	187.2	174.4
AgB01	3632203	3639239	AgB01_g238_t06	+	4421	5	hypothetical protein			N	N	N	28.3	104.4	32	4.3	12.7	8.6	5	5.8	11.5	92.5	13	19	20.3	24.1	100.3	88.4	69.4	73.4	65.4	70.7	80.3	175.2	105.6	202.9	198.5
AgB01	3616726	3646332	AgB01_g239_t01	-	19989	2	hypothetical protein			N	Y	Y	12.5	42.1	12.1	1.4	4	3	1.4	1.6	3.4	22.1	3.4	4.7	4.9	5.9	34.1	19.2	17.3	24.8	22.2	22.7	22.8	48.9	23.3	42.4	44.4
AgB01	3640036	3654993	AgB01_g240_t01	+	3508	8	hypothetical protein		Telo	N	N	N	4.7	2	1.9	0.4	0.7	4.8	3.1	3.2	1.5	2.7	11.1	11.1	17.4	17.2	16.6	14.8	6.8	10.8	12.2	9.7	6	3	1.8	1.1	2
AgB01	3642294	3654993	AgB01_g240_t02	+	5006	7	hypothetical protein		Telo	N	N	Y	4.2	1.7	1.5	0.3	0.5	3.4	2.2	2.3	1.1	1.9	7.9	7.9	12.3	12.1	11.8	10.4	4.9	7.6	8.6	6.8	4.2	2.1	1.3	0.8	1.4
AgB01	3645915	3654993	AgB01_g240_t03	+	3381	7	hypothetical protein		Telo	N	N	N	4.7	2	1.9	0.4	0.7	5	3.2	3.3	1.6	2.7	11.2	10.9	17.7	17	16.5	14.9	6.8	11	12.4	9.7	6.2	3.1	1.9	1.1	2.1
AgB01	3645981	3654993	AgB01_g240_t04	+	3419	7	hypothetical protein		Telo	N	Y	N	4.7	2	1.9	0.4	0.7	5	3.2	3.3	1.6	2.8	11.4	11.4	17.9	17.6	17	15.2	7	11.1	12.6	9.9	6.2	3	1.9	1.1	2.1
AgB01	3646864	3654993	AgB01_g240_t05	+	3381	6	hypothetical protein		Telo	N	N	N	4.3	1.9	1.8	0.4	0.6	4.6	2.9	3.1	1.6	2.6	11	10.6	17.4	16.5	16	14.4	6.4	10.6	11.8	9.4	6	3.1	1.8	1	1.9
AgB01	3660104	3665746	AgB01_g241_t01	+	1200	6	Proto-oncogene serine/threonine-protein kinase pim-1			N	Y	Y	0.8	0.2	0.5	0.3	0.2	1	2.5	3	0.5	0.5	3.3	3.4	2.9	5.2	1.6	0.7	0	0.2	0.6	0.1	0.5	0	1.8	11.5	0.4
AgB01	3667489	3675300	AgB01_g242_t01	-	2513	6	wu:fc32f04 protein		Telo	N	N	N	6.4	31.2	5.7	0.1	0.6	0.1	0.1	0.1	0	0.2	2.5	1.8	2.8	1.4	0.8	0.7	0.8	0.3	0.1	0.1	0.2	0	0.7	1.6	0.2
AgB01	3667489	3675333	AgB01_g242_t02	-	2130	8	wu:fc32f04 protein		Telo	N	Y	N	7.7	38.3	6.9	0.1	0.8	0.1	0.1	0.2	0.1	0.2	2.9	2.1	3.3	1.6	1	0.8	1.2	0.3	0.1	0.1	0.2	0	0.9	1.9	0.2
AgB01	3667489	3676898	AgB01_g242_t03	-	4178	7	wu:fc32f04 protein		Telo	N	N	Y	4.1	20.1	3.7	0	0.4	0.1	0.1	0.2	0.1	0.2	3.7	3.3	4.1	2.9	2.5	1.8	2	0.4	0.1	0.1	0.2	0.4	0.5	1	0.1
AgB01	3680094	3680465	AgB01_g243_t01	+	372	1	hypothetical protein		Telo	N	Y	Y	20.6	20.9	13.7	0.2	0.2	28.4	50.4	33.8	12.5	60.3	2.7	3	6.1	1.8	1.4	2.6	0.1	0.1	0	0	0.1	0	2	3.7	2
AgB01	3680782	3681965	AgB01_g244_t01	+	631	2	OV39 antigen			N	Y	Y	252.2	192.1	162.1	2.6	8.7	217.7	386.4	379.6	74	56.8	3	3.2	1.8	2	2	1.4	1.6	0.5	0	0.3	0.6	0	4.9	7.5	4
AgB01	3681610	3728443	AgB01_g245_t01	-	1848	9	methyltransferase-like protein 13	SL		N	N	N	40.8	28.5	23.8	0.5	1.6	33	62.3	65.1	11	3.3	0.3	0.5	0.5	0.2	0.6	0.4	0.1	0.1	0.2	0.2	1.8	0.9	5.7	3.9	2.4
AgB01	3721106	3733316	AgB01_g245_t02	-	1599	11	methyltransferase-like protein 13	SL		N	N	N	10.2	4.3	1.5	0.9	2.3	44.3	126.1	119.1	32.8	46	183.4	142	98.7	110.4	35.9	12.6	6.2	1.7	11.9	29.7	10.6	6.5	12.3	22.1	3.7
AgB01	3731355	3734734	AgB01_g245_t03	-	3024	2	hypothetical protein	SL		N	Y	Y	8.1	3	1.1	0.8	1.3	35.7	90.4	87.9	26.7	47.8	212.8	121.6	83.1	80.9	29.7	10.9	4.7	1.8	12.3	32.7	9.9	6.9	10.2	22.8	2.4
AgB01	3701284	3703238	AgB01_g246_t01	+	1955	1	40S ribosomal protein S21, partial	SL		N	N	Y	18.4	2	2.5	6.8	5.3	20.5	14.5	13.7	6.6	16.6	46.7	23.8	11.7	16.5	17.4	18	16	51.6	51	33.8	44.3	15.9	28.1	11	5.6
AgB01	3701334	3703482	AgB01_g246_t02	+	389	2	40S ribosomal protein S21, partial	SL		N	Y	N	164	17	20.4	59.2	47.2	167.7	128.3	127.3	67.5	96.1	269.1	137.3	70.5	108	111.4	114.7	111.4	360.9	331.7	211.8	289.6	80	173.4	70.7	37.1
AgB01	3713272	3715501	AgB01_g247_t01	-	823	2	hypothetical protein	SL		N	Y	Y	3.1	1.6	0.5	0.2	0.2	2.5	3.7	3.8	4.3	4.1	29.4	29	28.5	26.6	28.3	26.1	23.4	9.5	6.1	1.7	2.4	0	4	0.8	0.7
AgB01	3752063	3774641	AgB01_g248_t01	-	4421	20	nanos-like protein 2	SL		N	Y	N	99.9	38.1	5.9	1	7.8	112.1	151.3	132.5	6.5	10.8	23.5	24	39	18.3	9.6	6.5	5.4	0.6	0.3	0.8	1.1	1.6	1.3	1	0
AgB01	3752063	3774666	AgB01_g248_t02	-	4482	20	nanos-like protein 2	SL		N	N	N	99.1	38.1	5.8	0.9	7.7	111.2	149.7	131.3	6.5	10.8	23.7	24.2	39.3	18.4	9.7	6.6	5.4	0.6	0.3	0.8	1.1	1.5	1.3	1	0
AgB01	3752063	3774666	AgB01_g248_t03	-	4484	20	nanos-like protein 2	SL		N	N	N	99	38.1	5.8	0.9	7.7	111.3	149.7	131.2	6.5	10.9	23.6	24.2	39.2	18.3	9.6	6.6	5.4	0.6	0.3	0.8	1.1	1.5	1.3	1	0
AgB01	3752063	3774712	AgB01_g248_t04	-	4519	20	nanos-like protein 2	SL		N	N	N	98.4	37.9	5.8	0.9	7.7	110.1	148.3	130.1	6.5	10.7	23.5	24.1	39	18.3	9.6	6.5	5.3	0.6	0.3	0.8	1.1	1.5	1.3	1	0
AgB01	3752063	3774712	AgB01_g248_t05	-	6811	19	nanos-like protein 2	SL		N	N	N	66.2	26.2	4.1	0.6	5.1	73.2	98.5	86.4	4.3	7.1	15.7	16	25.9	12.2	6.4	4.3	3.5	0.4	0.2	0.5	0.7	1	0.9	0.7	0
AgB01	3752063	3774712	AgB01_g248_t06	-	6826	19	nanos-like protein 2	SL		N	N	Y	66	26	4.1	0.6	5.1	73.2	98.4	86.3	4.3	7.1	15.6	15.9	25.7	12.1	6.4	4.3	3.5	0.4	0.2	0.5	0.7	1	0.9	0.7	0
AgB01	3779501	3781113	AgB01_g249_t01	-	1212	2	hypothetical protein	SL		N	Y	Y	0.1	0.1	0.1	0.1	0	0	0	0	0	0.1	0.5	1.1	0.6	0.7	0.5	0.3	0.4	0	0	0	0	0	73.8	4	45.8
AgB01	3779875	3781258	AgB01_g250_t01	.	1384	1	hypothetical protein	SL		N	Y	Y	0.1	0.1	0.1	0.3	0.2	0	0	0.1	0	0	0.4	0.3	0.3	0.8	0.1	0.1	0.1	0	0	0	0.1	0	68.2	4.2	53.7
AgB01	3782705	3784199	AgB01_g251_t01	-	920	2	Tubulin beta-1 chain, partial			N	N	N	0.4	0.3	0.2	0.2	0.1	0.1	0.1	0	0	0	0.4	0.2	0.2	0.2	0.3	0.4	0.3	0	0.2	2	7.3	11.3	1.7	1	0
AgB01	3782705	3795562	AgB01_g251_t02	-	2905	11	Tubulin beta-1 chain			N	N	Y	0.7	0.1	0.1	0.1	0.1	0.4	0.2	0.1	0	0	0.4	0.5	0.5	0.2	0.4	0.4	0.2	0	0.1	2.6	8.2	15.5	1.2	0.8	0
AgB01	3782705	3795903	AgB01_g251_t03	-	2669	12	Tubulin beta-4 chain, partial			N	Y	N	0.7	0.2	0.1	0.1	0.2	0.4	0.2	0.2	0	0	0.5	0.6	0.5	0.3	0.4	0.4	0.2	0	0.1	2.8	8.8	16.8	1.3	0.9	0
AgB01	3803075	3814443	AgB01_g252_t01	-	1524	10	Tubulin beta-4 chain, partial			N	N	N	12.3	1.6	8.6	50.8	20.1	24.4	23.7	20.1	12.2	28.7	58.6	97	62.9	68.1	38.3	53.7	40.2	19.1	21.8	19.2	36.9	38.6	35.6	23.9	16.9
AgB01	3803075	3814443	AgB01_g252_t02	-	1640	11	Tubulin beta-4 chain, partial			N	Y	Y	0.5	0.5	1	16.7	8.1	0	0.1	0	0.2	0.2	0.2	0.2	0.2	0.2	1.7	2.4	1.1	0.2	0.1	2.4	31.2	42.2	3.8	0.2	0
AgB01	3824976	3826735	AgB01_g253_t01	-	518	2	Rab-like protein 5			N	Y	Y	0.9	0.7	0.1	0.1	0	0.1	0.6	0.4	0.2	0.7	6.8	5.4	9	4.4	9.4	12.9	9.7	0.4	0.2	0.5	5	3.3	0	0	0
AgB01	3827676	3848903	AgB01_g254_t01	+	4419	15	hypothetical protein			N	Y	N	28.3	41.7	3.2	0.1	0.9	0.2	0.3	0.3	0.1	0.9	5.5	3.5	1.8	4.5	4.5	3.4	1.7	0.6	0.4	0.7	0.4	0.4	0.6	0.1	0
AgB01	3827676	3853325	AgB01_g254_t02	+	582	4	hypothetical protein		Telo	N	N	N	48.7	49.1	5.3	0	1.2	1.3	0.4	0.6	0.4	0.2	1.3	2.1	1.2	3.2	5.8	3.5	1.6	0.8	0.9	1.6	1.5	0	0.2	0	0
AgB01	3827723	3867708	AgB01_g254_t03	+	4875	16	hypothetical protein	SL	Telo	N	N	Y	25.1	37.4	2.9	0.1	0.7	0.1	0.2	0.3	0.2	0.8	7.1	5.1	3.7	5.2	5.2	4	2.1	0.5	0.2	0.3	0.4	0.4	0.5	0.1	0
AgB01	3827733	3846020	AgB01_g254_t04	+	3356	11	hypothetical protein			N	N	N	32.9	48.1	3.7	0.1	1	0.1	0.1	0.1	0	0.1	0.6	0.6	0.8	1	2	2.1	1.6	0.4	0.1	0.2	0.3	0	0.3	0	0.1
AgB01	3827739	3846020	AgB01_g254_t05	+	2788	12	hypothetical protein			N	N	N	39.1	57.7	4.5	0	1.2	0.1	0.1	0.1	0	0.1	0.7	0.8	0.9	1.2	2.4	2.6	1.9	0.5	0.2	0.2	0.3	0	0.4	0	0.1
AgB01	3829691	3837766	AgB01_g254_t06	+	2317	7	hypothetical protein			N	N	N	35.5	50.4	4.3	0.2	0.8	0.4	0.3	0.4	0.3	0.5	2	1.9	2.1	2.2	3.7	3.7	3.9	1.3	1.2	1.4	1	0	0.6	0.2	0.3
AgB01	3829691	3846020	AgB01_g254_t07	+	3347	10	hypothetical protein			N	N	N	32.8	47.7	3.6	0.1	0.9	0.1	0.1	0.1	0	0.1	0.6	0.6	0.7	1	2	2.1	1.6	0.4	0.1	0.2	0.3	0	0.3	0	0.1
AgB01	3843236	3846020	AgB01_g254_t08	+	1774	2	hypothetical protein			N	N	N	12.5	20.1	1.1	0.1	0.6	0	0	0	0	0	0.1	0.1	0.1	0.3	0.2	0.2	0.2	0	0	0	0	0	0	0	0
AgB01	3859507	3867708	AgB01_g254_t09	+	4233	7	hypothetical protein	SL		N	N	N	15.3	14.7	1.1	0.1	0.6	0.5	0.8	1	0.7	1.2	11	9.9	7.4	9.5	8.1	5.2	1.9	0.4	0.4	0.8	0.4	0.4	0.5	0	0
AgB01	3869706	3882874	AgB01_g255_t01	+	8191	5	hypothetical protein		Telo	N	Y	N	4.1	9	1.7	0.1	0.6	0	0	0	0	0	0.6	0.8	0.6	0.9	4.1	4.5	3.3	0.5	0.1	0.1	0.2	0.2	0.2	0	0
AgB01	3870038	3882874	AgB01_g255_t02	+	9752	5	hypothetical protein		Telo	N	N	N	4.6	10.2	1.8	0.1	0.6	0	0.1	0.1	0	0	0.5	0.7	0.5	0.8	3.5	3.8	2.8	0.5	0.1	0.1	0.2	0.2	0.2	0	0
AgB01	3870121	3882874	AgB01_g255_t03	+	7889	3	hypothetical protein		Telo	N	N	N	4	8.2	1.8	0.1	0.5	0	0.1	0.1	0	0	0.6	0.8	0.6	1	4.5	5	3.6	0.6	0.1	0.2	0.2	0.2	0.2	0	0.1
AgB01	3870126	3882874	AgB01_g255_t04	+	9626	4	hypothetical protein		Telo	N	N	N	4.3	9.4	1.7	0.1	0.5	0	0.1	0.1	0	0	0.5	0.7	0.5	0.8	3.5	3.9	2.9	0.5	0.1	0.2	0.2	0.2	0.1	0	0
AgB01	3870146	3882874	AgB01_g255_t05	+	10007	3	hypothetical protein		Telo	N	N	Y	4.4	9.6	1.7	0.1	0.5	0	0	0	0	0	0.5	0.7	0.5	0.8	3.7	4	2.9	0.4	0.1	0.1	0.2	0.2	0.2	0	0
AgB01	3874935	3882874	AgB01_g255_t06	+	7940	1	hypothetical protein			N	N	N	2.5	5.5	1	0.1	0.3	0	0.1	0.1	0	0	0.5	0.5	0.4	0.8	2.7	3.2	2.2	0.6	0.1	0.2	0.2	0.2	0.1	0	0
AgB01	3899780	3921386	AgB01_g256_t01	+	2743	18	multidrug resistance protein pgp-1			N	N	N	0.3	0.1	0	0	1.9	0.8	0.3	0.5	0.2	0	0.8	0.6	0.3	1.2	2.4	5.1	3.1	0.9	0.5	2.9	1.4	1.3	3.7	4.1	43.2
AgB01	3899780	3930552	AgB01_g256_t02	+	3999	26	multidrug resistance protein pgp-1			N	N	N	0.6	0.1	0	0	2	0.9	0.6	0.7	0.2	0.2	1.2	0.8	0.7	1.5	2.4	5.2	3.7	1	0.5	3.3	1.5	0.4	5	5.1	48.8
AgB01	3901903	3930552	AgB01_g256_t03	+	4093	26	multidrug resistance protein pgp-1			N	N	Y	0.6	0.1	0	0	2	0.9	0.6	0.7	0.2	0.1	1.2	0.8	0.7	1.4	2.4	5.1	3.6	0.9	0.5	3.2	1.5	0.4	4.9	5.1	48.3
AgB01	3910010	3930552	AgB01_g256_t04	+	3715	20	multidrug resistance protein pgp-1			N	Y	N	0.6	0.1	0	0	1.9	0.8	0.5	0.7	0.2	0.2	1	0.8	0.7	1.3	2.3	5.2	3.9	1	0.6	3.7	1.7	0	4.8	4.9	45.9
AgB01	3952942	3975959	AgB01_g257_t01	-	2297	12	5'-AMP-activated protein kinase subunit gamma-2	SL		N	N	N	8	1.3	5.5	3.4	2.9	14.8	13.7	13	5.8	5.6	13.1	12.7	10.7	30.3	36.6	25.9	17.6	20.8	22.6	25.4	20.1	29.4	4.1	10.5	1.8
AgB01	3952942	3992686	AgB01_g257_t02	-	2526	12	5'-AMP-activated protein kinase subunit gamma-2	SL		N	N	N	8.4	1.5	4.9	3.1	3.1	14.3	12.8	12.3	5.3	5.3	13.1	13.7	12.2	29.4	35.8	25.3	17.8	20.8	22.8	26.4	20.8	28.7	3.8	9.6	1.8
AgB01	3955317	3992686	AgB01_g257_t03	-	3548	13	5'-AMP-activated protein kinase subunit gamma-2	SL		N	N	N	6.7	1.3	3.5	2.1	2.2	11.4	10.6	9.8	5.2	10.1	37	26.7	19.5	40.5	70.9	36.6	20.3	31.8	34.5	41.9	31.8	33.1	4.3	9.9	1.9
AgB01	3955317	3992700	AgB01_g257_t04	-	3861	12	5'-AMP-activated protein kinase subunit gamma-2	SL		N	N	Y	5.7	1.1	3.3	1.9	1.8	10.2	9.7	8.9	4.7	9.3	34.6	24.6	17.9	37.6	66.2	34	18.5	30.2	32.8	39.3	30.3	31.8	4.1	9.3	1.8
AgB01	3955317	3992723	AgB01_g257_t05	-	3732	11	5'-AMP-activated protein kinase subunit gamma-2	SL		N	Y	N	5.9	1.1	3.4	2	1.9	10.4	9.5	8.9	4.4	9.3	34.5	24.4	17.7	38	68.3	35.2	19.2	31.1	34	40.6	31.2	34.3	4.2	9.6	1.8
AgB01	3955317	3992723	AgB01_g257_t06	-	3433	12	5'-AMP-activated protein kinase subunit gamma-2	SL		N	N	N	7	1.4	3.6	2.1	2.3	11.7	10.5	9.8	4.8	10.1	36.9	26.5	19.4	40.9	73	37.8	20.9	32.6	35.7	43.3	32.8	35.8	4.4	10.2	2
AgB01	3955317	3992723	AgB01_g257_t07	-	3373	12	5'-AMP-activated protein kinase subunit gamma-2	SL		N	N	N	7.1	1.4	3.7	0	2.4	11.9	10.7	10	4.8	10	37.2	26.6	19.5	41	73.5	38	21.3	32.2	35.7	42.9	32.7	35.4	4.4	10.2	2
AgB01	3959481	3975950	AgB01_g257_t08	-	1531	10	5'-AMP-activated protein kinase subunit gamma-2	SL		N	N	N	11.3	1.9	7.2	4.5	4.1	21.8	20.4	19.5	8.9	7.6	19.4	19	15.8	45.3	54.9	38.4	23.5	31.3	34.3	39	29.7	37.3	3.9	11.5	2.6
AgB01	3959481	3981411	AgB01_g257_t09	-	1542	10	5'-AMP-activated protein kinase subunit gamma-2	SL		N	N	N	11.1	1.9	7.1	4.5	4	22	21.4	20.2	9.9	8	20	19.3	16.5	46.1	55	38.4	23.4	31.4	34.2	39	29.7	37	3.9	11.4	2.6
AgB01	3959481	3992577	AgB01_g257_t10	-	1660	10	5'-AMP-activated protein kinase subunit gamma-2	SL		N	N	N	10.4	1.8	6.6	4.2	3.7	20.2	18.8	18	8.2	7.3	19.6	20.7	18.3	44.5	54.4	38.1	23.6	31.2	35	40.9	30.7	37.5	3.6	10.7	2.5
AgB01	3985230	3992700	AgB01_g257_t11	-	2504	2	hypothetical protein			N	N	N	1.7	0.4	0	0.1	0.7	1.2	0.6	0.6	0	0.3	3.5	5.2	5.5	3.7	3.6	3.5	4.3	3.6	4.9	7.5	3.6	0	0.5	0.2	0.4
AgB01	3995756	4011804	AgB01_g258_t01	+	7130	11	ribonuclease p protein 1-like protein	SL		N	N	N	3.8	1.7	1.7	1.1	1.9	4.8	3.1	3	1.6	3.3	12.3	7.6	4.7	10.5	21.2	16.4	8.9	22.7	19.6	17.4	15.5	7.8	6.1	3.6	3.3
AgB01	3995756	4011804	AgB01_g258_t02	+	5552	12	ribonuclease p protein 1-like protein	SL		N	N	N	4.6	1.7	2	1.3	2.3	5.9	3.8	3.7	1.9	4	14.5	9.2	5.6	13	25.9	19.9	10.7	27.5	23.6	20.7	18.3	8.7	7.3	4.3	4
AgB01	3996390	4011804	AgB01_g258_t03	+	7381	10	ribonuclease p protein 1-like protein	SL		N	N	N	3.7	1.6	1.7	1	1.9	4.6	3	2.9	1.5	3.2	11.9	7.4	4.5	10.2	20.5	15.9	8.6	22	19	16.9	15	7.5	5.9	3.4	3.2
AgB01	3996390	4011804	AgB01_g258_t04	+	5803	11	ribonuclease p protein 1-like protein	SL		N	N	N	3.8	1.5	1.7	0.9	2	5.1	3.3	3.2	1.7	2.7	10.9	6.5	3.8	9.8	19.3	15.6	8.6	22	19	16.9	15	7.1	6	3.6	3.3
AgB01	3996718	4011804	AgB01_g258_t05	+	7430	9	ribonuclease p protein 1-like protein	SL		N	N	Y	2.6	1.2	1.3	0.6	1.5	3.8	2.4	2.3	1.2	1.9	7	4.5	2.6	6.8	12.5	10.2	5.6	14.5	13.4	12.7	10.9	5.4	3.3	2	2.1
AgB01	3996718	4011804	AgB01_g258_t06	+	5424	11	ribonuclease p protein 1-like protein	SL		N	Y	N	3.7	1.5	1.7	0.9	2	5.1	3.4	3.2	1.6	2.5	9.3	6	3.6	9.1	16.4	13.5	7.3	18.7	16.8	15.5	13.4	6.4	4.2	2.6	2.7
AgB01	4005782	4011608	AgB01_g259_t01	-	3771	3	Reactive oxygen species modulator 1	SL		N	Y	N	2.1	1	0.8	0.8	0.8	1.7	1.1	1.1	0.6	3.7	13.7	10.8	5.8	10.7	25.9	15.1	8.5	18	15.2	12.3	11.5	6	5.9	3.3	2.5
AgB01	4005782	4011677	AgB01_g259_t02	-	2759	3	Reactive oxygen species modulator 1	SL		N	N	N	2.2	1.2	0.9	0.9	0.8	1.9	1.1	1	0.5	4.1	14	13	6.9	11.9	27.1	14.5	8	15.2	13.9	11.6	10.8	5.6	3.7	2.1	1.8
AgB01	4005782	4011992	AgB01_g259_t03	-	4617	2	Reactive oxygen species modulator 1	SL		N	N	Y	1.9	0.7	0.6	0.7	0.5	1.3	0.9	0.9	0.5	2.7	10.7	8.6	4.7	8.5	20.5	11.9	6.6	14.2	12	9.2	8.8	4.1	4.6	2.6	1.9
AgB01	4013564	4014325	AgB01_g260_t01	.	762	1	hypothetical protein			N	Y	Y	0.2	0.9	0	0	0	0	0	0	0	0	0.3	0.2	1	0.4	1.1	0.2	0.2	0	0	0	0	0	0.1	0	0
AgB01	4016125	4021383	AgB01_g261_t01	-	1357	7	hypothetical protein			N	N	N	1	0.5	5.5	60.1	18.2	0.5	0.4	0.1	5.4	3.3	1	1.1	1.2	2.4	46.7	68.6	46.4	16.1	5.2	2.3	2.5	7.6	18.7	4.2	0.2
AgB01	4016125	4022562	AgB01_g261_t02	-	1789	6	hypothetical protein			N	N	N	0.9	0.4	4.7	51.2	15.3	0.4	0.3	0	4.4	3.6	1.3	1.2	1	2.3	59.1	79.4	50	21.7	6.6	2.6	3.4	12.6	19.3	4.7	0.1
AgB01	4016125	4024294	AgB01_g261_t03	-	5798	4	hypothetical protein			N	N	Y	0.4	0.2	1.5	15.5	4.7	0.1	0.1	0	1.3	1.3	0.7	0.6	0.6	1.1	20.6	26.4	16.8	7.4	2.1	0.9	1.3	3.6	6.1	1.5	0
AgB01	4016125	4024294	AgB01_g261_t04	-	5239	5	hypothetical protein			N	N	N	0.5	0.2	1.6	17.5	5.3	0.2	0.1	0	1.5	1.4	0.7	0.6	0.6	1	22.2	28.9	18.4	8.1	2.3	0.9	1.4	4.3	6.7	1.7	0
AgB01	4016125	4027023	AgB01_g261_t05	-	1793	6	hypothetical protein			N	N	N	0.9	0.4	4.7	51.3	15.3	0.4	0.3	0	4.4	3.7	1.4	1.3	1.2	2.4	61.9	81.5	51.4	22.2	6.7	2.6	3.5	12.5	19.7	4.8	0.2
AgB01	4016125	4027104	AgB01_g261_t06	-	1052	7	hypothetical protein			N	Y	N	1.2	0.6	7.2	77.7	23.6	0.7	0.5	0.1	6.9	4.5	1.2	1.6	2	3.1	63.7	91.4	61.8	21	6.8	2.9	3.4	9.9	24.3	5.2	0.2
AgB01	4029601	4043228	AgB01_g262_t01	-	2984	14	hypothetical protein	SL		N	N	N	11.5	24.7	7.2	1.6	2.5	17.1	11.9	11.7	7.4	6.6	7	7	8.4	10.7	12.1	9.6	8.4	6.2	6.7	5.7	5	8.7	4.2	5.4	8.7
AgB01	4029601	4044358	AgB01_g262_t02	-	3753	12	hypothetical protein	SL		N	N	N	9.3	19.1	5.6	1.4	2.1	13.8	9.7	9.6	6.3	6.1	6.2	5.9	6.2	9.3	11.4	9.1	7.2	5.8	6	5	4.5	9.2	4	5.4	7.9
AgB01	4029601	4045143	AgB01_g262_t03	-	6445	11	hypothetical protein	SL		N	N	Y	5.9	12.4	3.6	0.8	1.3	8.1	5.7	5.6	3.6	3.6	3.8	3.6	4	5.8	6.9	5.4	4.4	3.6	3.9	3.3	2.8	5.6	2.4	3.2	4.7
AgB01	4029601	4045143	AgB01_g262_t04	-	4942	12	hypothetical protein	SL		N	N	N	7.4	15.4	4.5	1	1.7	10.5	7.4	7.3	4.8	4.7	4.8	4.7	5.2	7.4	9	7	5.6	4.5	4.8	4	3.6	7.3	3.1	4.2	6.1
AgB01	4029601	4045143	AgB01_g262_t05	-	5316	13	hypothetical protein	SL		N	N	N	7.1	14.5	4.2	1	1.6	9.8	6.9	6.8	4.4	4.4	4.5	4.4	4.8	6.9	8.4	6.5	5.1	4.3	4.5	3.8	3.4	6.8	2.9	3.9	5.6
AgB01	4035314	4044358	AgB01_g262_t06	-	1770	8	hypothetical protein	SL		N	Y	N	10.7	23.7	8.1	1.5	2.8	20.2	14	13.8	4.8	2.3	4.5	5.3	9.3	8.7	9	6.3	9.1	4.8	4.9	3.7	3.3	1	2.1	2.4	6.8
AgB01	4061212	4067313	AgB01_g263_t01	-	1737	5	hypothetical protein		Telo	N	N	N	22.6	55	6.3	0.2	1.5	0	0.1	0	0	0	0.5	0.3	0	0.2	1.6	1.2	2.4	0.9	0.2	0.3	1	1	0.3	0.1	0.1
AgB01	4061212	4067340	AgB01_g263_t02	-	1854	5	hypothetical protein		Telo	N	N	N	25.3	52	5.6	0.2	1.7	0.1	0.1	0	0	0	0.6	0.4	0	0.2	1.6	1.2	2.4	0.9	0.2	0.3	0.9	0.9	0.3	0.1	0.2
AgB01	4061212	4067340	AgB01_g263_t03	-	1893	5	hypothetical protein		Telo	N	Y	Y	24.3	59.7	6.6	0.2	1.9	0.1	0.1	0	0.1	0	0.6	0.3	0	0.2	1.5	1.2	2.4	0.8	0.2	0.3	1	1.8	0.3	0.1	0.2
AgB01	4065605	4067313	AgB01_g263_t04	-	597	2	hypothetical protein		Telo	N	N	N	27.4	48	4.4	0.2	1.4	0.1	0	0	0	0.1	0.3	0.4	0.3	0.1	0.3	0.2	0.7	0.3	0.1	0.4	1.3	0	0.2	0	0.1
AgB01	4067813	4082565	AgB01_g264_t01	+	2734	5	hypothetical protein	SL		N	Y	Y	0.1	0	0.1	0.7	0.5	0.1	0.1	0	1.2	1.2	3.6	2.4	2.8	5.5	5.4	2.2	0.4	0.7	0.5	0.5	2	8.9	3.4	6.1	0.1
AgB01	4068293	4082565	AgB01_g264_t02	+	2469	4	hypothetical protein	SL		N	N	N	0.1	0	0	0.6	0.4	0.1	0.1	0	1.4	0.9	2.9	2.1	2.6	5.1	4.7	2	0.4	0.7	0.5	0.5	1.7	7	3.5	6.1	0.1
AgB01	4085207	4099395	AgB01_g265_t01	-	4783	12	ras-specific guanine nucleotide-releasing factor 1	SL		N	N	N	1.5	0.9	0.5	0	1.4	4	3.8	4.4	1.8	1.9	5.4	4.3	3.7	7.1	10.3	7.4	3.7	6	8.3	21.1	9.5	3.3	54.3	11.5	0.1
AgB01	4085207	4099395	AgB01_g265_t02	-	4783	12	ras-specific guanine nucleotide-releasing factor 1	SL		N	N	N	1.5	0.9	0.5	0	1.4	4	3.8	4.4	1.8	1.9	5.4	4.3	3.7	7.1	10.3	7.4	3.7	6	8.3	21.1	9.5	3.3	54.3	11.5	0.1
AgB01	4085207	4099405	AgB01_g265_t03	-	4886	13	ras-specific guanine nucleotide-releasing factor 1	SL		N	Y	Y	1.5	0.8	0.5	0	1.3	3.8	3.8	4.3	1.9	1.8	5.3	4.3	3.5	7	10	7.3	3.7	5.9	8.2	20.7	9.3	3.2	53.1	11.3	0.1
AgB01	4085207	4099405	AgB01_g265_t04	-	4886	13	ras-specific guanine nucleotide-releasing factor 1	SL		N	N	N	1.6	0.9	0.5	0	1.4	4.1	4	4.6	1.9	1.9	5.4	4.3	3.6	7.2	10.3	7.5	3.8	6	8.4	21.2	9.6	3.2	54.8	11.7	0.1
AgB01	4085207	4100495	AgB01_g265_t05	-	4744	14	ras-specific guanine nucleotide-releasing factor 1	SL		N	N	N	1.6	0.9	0.5	0	1.4	4.2	4.1	4.7	2	1.8	5.3	4.1	3.6	7.2	10.1	7.6	3.8	6.1	8.4	21.4	9.8	3.3	56.4	12	0.2
AgB01	4085207	4100495	AgB01_g265_t06	-	4744	14	ras-specific guanine nucleotide-releasing factor 1	SL		N	N	N	1.6	0.9	0.5	0	1.4	4.2	4.1	4.7	2	1.8	5.3	4.1	3.6	7.2	10.1	7.6	3.8	6.1	8.4	21.4	9.8	3.3	56.4	12	0.2
AgB01	4094218	4095135	AgB01_g266_t01	+	918	1	Ras-specific guanine nucleotide-releasing factor RalGPS1			N	N	Y	0.6	0.4	0.2	0	0.1	1.4	1	1.5	0.4	0.2	0.5	0.2	0.7	1.5	1.7	1.5	0.2	1.4	2.1	6.5	2.2	0	13.5	1.9	0
AgB01	4094538	4095135	AgB01_g266_t02	+	276	2	ras-specific guanine nucleotide-releasing factor 1			N	Y	N	1.9	1.1	0.3	0	0.4	4.1	2.8	4.9	0.4	0.8	1.2	0.6	2.3	4.2	5.3	3.8	0.6	3.3	3.1	9.6	5.4	0	27	5.1	0
AgB01	4113696	4121063	AgB01_g267_t01	+	2948	3	cathepsin b-like cysteine proteinase 6			N	N	Y	0.3	0.1	0	0	0	0.1	0.1	0	0.3	0.4	0.1	0.1	0.2	0.1	0.1	0.4	0.9	1.5	1.4	1.3	1.1	0.6	3.3	2.3	11.6
AgB01	4115084	4121063	AgB01_g267_t02	+	485	3	cathepsin b-like cysteine proteinase 6			N	N	N	0.5	0.5	0	0	0.3	0.1	0.4	0	0.7	1.2	0.3	0.3	0	0.2	0.4	2.1	5.3	3.6	4.4	4.4	3.2	0	16.2	11.2	65.1
AgB01	4115986	4121063	AgB01_g267_t03	+	1340	2	cathepsin b-like cysteine proteinase 6			N	Y	N	0.3	0.2	0	0	0.1	0.2	0.2	0.1	0.7	0.4	0.1	0.1	0	0.1	0.2	0.8	2.2	3.2	3.1	2.6	1.8	1.3	7	4.9	25.6
AgB01	4119348	4121940	AgB01_g268_t01	-	1372	4	cathepsin B-like cysteine proteinase			N	N	Y	0.2	0.2	0	0	0.6	0.4	0.7	0.6	1.7	0.7	0.6	0.2	0.2	0.3	1	4.5	7.3	7.9	9	8.7	6.3	2.5	20.2	12.2	97.1
AgB01	4120533	4121940	AgB01_g268_t02	-	545	2	cathepsin B-like cysteine proteinase			N	Y	N	0.2	0.2	0.1	0	1.4	1	1.7	1.4	4.3	1.7	1.6	0.6	0.5	0.6	2.5	11.2	18	19.7	22.5	21.7	15.4	6.3	50.3	28.6	244.3
AgB01	4123082	4131757	AgB01_g269_t01	-	930	6	cathepsin B-like cysteine proteinase			N	Y	Y	0.4	0.1	0.6	0.1	8.2	1.2	1.2	1.2	4.7	4.9	0.7	1	0.1	0.5	11	40	76.5	59.1	58.3	59.5	43.3	5.6	72.9	36.4	380.1
AgB01	4128781	4130227	AgB01_g270_t01	.	1447	1	cathepsin B-like cysteine proteinase			N	Y	Y	0	0	0	0.1	1.1	0	0	0	0	0	0.1	0.3	0.2	0.1	1.3	4.5	10.6	4.7	4.5	5	3.1	0	5.2	2.6	27.8
AgB01	4133606	4138843	AgB01_g271_t01	-	1661	6	Glutathione S-transferase	SL		N	N	Y	0.6	0.6	1.9	3.3	3.5	1.1	2.5	2.8	3.1	2.1	4.1	2.6	1.1	4.4	2.3	2	1.8	7.4	3.5	3.1	11.2	2.1	3.3	1.5	2.1
AgB01	4133606	4138843	AgB01_g271_t02	-	1251	7	Glutathione S-transferase	SL		N	Y	N	0.9	0.8	2.6	4.3	4.7	1.4	3.3	3.7	4.2	3.1	6.2	3.9	1.6	6.7	3.4	3	2.5	10.4	5.1	4.4	15.4	2.8	4.5	2	2.9
AgB01	4145050	4147828	AgB01_g272_t01	-	1357	3	Glutathione S-transferase 2			N	N	N	298.3	53	86.6	180.7	129.9	156.4	237.6	222.1	148.3	35.3	60.1	31	20.6	27.9	17.9	24.8	32.9	100.2	127.9	81.7	62.1	44.6	196	106.6	229.5
AgB01	4145050	4151250	AgB01_g272_t02	-	1902	8	glutathione s-transferase 2	SL		N	Y	N	385.7	71.9	124.9	269.2	181.3	226.2	328.7	293.7	175.1	110.2	154.3	113.5	57.6	72	43.8	62.2	64.2	187.6	248.6	183.8	114.9	106.3	318	171.2	418.4
AgB01	4145050	4152283	AgB01_g272_t03	-	3431	8	glutathione s-transferase 2	SL		N	N	Y	219	41.6	69.4	149.3	100.6	125.8	182.5	163.1	97.3	61.7	85.4	63.1	32.2	40.1	24.2	34.5	35.8	103.8	137.7	101.6	63.6	58.9	176.5	94.8	231.1
AgB01	4145050	4152283	AgB01_g272_t04	-	3426	8	glutathione s-transferase 2	SL		N	N	N	219.2	41.6	69.5	149.5	100.7	126	182.8	163.3	97.5	61.3	84.8	62.1	32.2	39.9	24.1	34.4	35.5	103.2	136.8	101.1	63.3	58.5	174.6	94.7	228.7
AgB01	4152092	4160028	AgB01_g273_t01	+	1522	9	wu:fc32f04 protein	SL		N	N	Y	16.6	81.8	13.5	1.7	2.3	0	0.1	0	5.4	34.4	0.6	2.4	4	1	2.4	4.3	3.9	0.5	0	0	0.4	0	4.5	0.6	3.9
AgB01	4152216	4160028	AgB01_g273_t02	+	1423	9	wu:fc32f04 protein	SL		N	N	N	18.4	89.8	16.3	2.2	2.7	0	0.1	0	5.2	41.8	0.7	2.9	4.7	1.4	2.7	4.9	5.1	0.6	0	0	0.4	0	4.7	0.7	4.2
AgB01	4152914	4160028	AgB01_g273_t03	+	1457	10	wu:fc32f04 protein	SL		N	Y	N	19.3	93.4	16.9	2.1	2.5	0	0.1	0	5.7	40.8	0.7	2.9	4.8	1.3	2.7	4.9	5	0.6	0	0	0.4	0	4.6	0.6	4
AgB01	4152978	4160028	AgB01_g273_t04	+	1312	9	wu:fc32f04 protein	SL		N	N	N	19.2	95.2	15.8	2	2.3	0	0.1	0	5.9	39.3	0.6	2.8	4.7	1.1	2.8	4.9	4.5	0.6	0	0	0.4	0	4.9	0.6	4.3
AgB01	4160766	4175444	AgB01_g274_t01	+	3823	10	MBT domain-containing protein 1	SL		N	Y	Y	3.9	1.2	0.4	0.3	1.5	3.5	2.1	1.9	1.1	0.7	6	5.4	6.2	11.3	11.5	12	15.3	19.2	18.7	10.9	15.4	2.7	1.8	0.5	1.4
AgB01	4162900	4164369	AgB01_g275_t01	+	424	2	MBT domain-containing protein 1	SL		N	Y	Y	7.2	2.4	1.5	0	1	5.9	2.7	2	0.3	1.6	16.8	14.6	16.1	28.6	36.1	33.1	29	28.4	23.8	14.2	8.2	0	0.1	0.1	0.1
AgB01	4172903	4176468	AgB01_g276_t01	-	2623	3	hypothetical protein	SL		N	Y	Y	0.5	0.2	0.1	0.1	2.4	0.1	0.2	0.1	0.3	0.6	2.2	1.4	0.5	2.2	3.6	2.9	3	7	10.6	6.9	61.4	5.3	6.3	1.9	7.2
AgB01	4177626	4186639	AgB01_g277_t01	+	4976	7	hypothetical protein			N	Y	Y	0	0	0	0	0.2	0	0	0	0	0	0	0	0	0	0	0	0	0	0	0.1	1.7	0.3	2.1	0.2	8.3
AgB01	4180741	4182454	AgB01_g277_t02	+	1714	1	hypothetical protein			N	N	N	0	0	0	0	0.8	0	0	0	0	0	0	0	0	0	0	0	0	0	0	0.1	2.5	1	4.5	0.3	18.8
AgB01	4182724	4183121	AgB01_g277_t03	+	398	1	hypothetical protein			N	N	N	0	0	0	0	0	0	0	0	0	0	0	0	0	0	0	0	0	0	0	0	0.3	0	0.6	0.1	4.2
AgB01	4187305	4190579	AgB01_g278_t01	+	880	4	hypothetical protein			N	Y	Y	0	0	0	0	0	0	0	0.1	0	0	0	0	0	0.1	0	0	0	0	0	0	1.2	2	3.3	0.9	12.7
AgB01	4187718	4195145	AgB01_g278_t02	+	664	3	hypothetical protein	SL		N	N	N	0	0	0	0	0	0	0	0.1	0	0	0	0	0	0.1	0	0	0	0	0	0	1	0	2.8	0.7	11.4
AgB01	4190878	4191736	AgB01_g279_t01	+	859	1	hypothetical protein	SL		N	Y	Y	0	0	0	0	0.4	0.2	1	0.4	0	0	0.1	0	0.2	0.3	0.1	0.1	0.1	0	0	0	0.6	0	18.2	2.4	56.3
AgB01	4192695	4196867	AgB01_g280_t01	+	1680	2	hypothetical protein	SL		N	Y	Y	0	0	0	0	0.1	0	0.2	0.3	0	0	0	0.1	0.3	0.2	0.1	0.1	0	0	0	0	0.4	0	8.5	1.1	23.5
AgB01	4197256	4202048	AgB01_g281_t01	-	2721	3	Acyl-CoA-binding protein 3	SL		N	N	Y	0.3	0	0	0	0.1	0.2	0.2	0.2	0.2	0	0	0	0	0	0.4	0.3	0	5.4	9.2	3.7	10.2	0	15.6	5.6	1.4
AgB01	4197256	4202347	AgB01_g281_t02	-	2532	4	Acyl-CoA-binding protein 3	SL		N	N	N	0.3	0.1	0	0	0.2	0.2	0.3	0.3	0.2	0	0	0	0	0	0.5	0.3	0	5.3	8.9	3.6	9.9	0	17.5	6.6	1.5
AgB01	4197256	4202704	AgB01_g281_t03	-	2324	5	Acyl-CoA-binding protein 3	SL		N	Y	N	0.3	0.1	0	0	0.3	0.2	0.3	0.3	0.2	0	0	0	0	0	0.5	0.4	0	5.8	9.6	3.9	10.6	0	19	7.4	1.6
AgB01	4197256	4203948	AgB01_g281_t04	-	2248	5	Acyl-CoA-binding protein 3	SL		N	N	N	0.4	0.1	0	0	0.3	0.2	0.3	0.3	0.2	0	0	0	0	0	0.5	0.4	0	6	10	4.1	11	0	19.3	7.4	1.6
AgB01	4230143	4233869	AgB01_g282_t01	+	1115	3	hypothetical protein			N	N	Y	0.2	4.6	0.8	0	0.2	0.2	0	0	0	0	0.2	0.2	0	0	0.4	0.3	0	0	0	0	0.5	4.7	1.6	0.9	0
AgB01	4230458	4233869	AgB01_g282_t02	+	1096	3	hypothetical protein			N	Y	N	0.1	4.1	0.8	0	0.2	0.2	0	0	0	0	0.2	0.2	0	0	0.3	0.2	0	0	0	0	0.4	4.7	1.4	0.9	0
AgB01	4243984	4248333	AgB01_g283_t01	-	1600	5	leucine aminopeptidase 1			N	N	N	51.9	5.6	8.9	14	14.1	42.5	23.2	21.7	9	6.7	25.7	26.1	26.4	28.6	21.8	36.3	41.4	44	29.7	16.4	11.6	17.3	12.4	6.4	10.5
AgB01	4243984	4248335	AgB01_g283_t02	-	1641	5	Leucine aminopeptidase 1			N	N	N	52.9	6	9.4	0	14.4	43.9	23.4	22.1	8.9	6.9	26	26	26	29.2	22.4	36.7	41	45.4	30.3	16.9	12.2	19	12.7	6.6	11
AgB01	4243984	4248576	AgB01_g283_t03	-	1557	5	leucine aminopeptidase 1			N	N	N	50.5	5.4	8.7	13.4	13.3	41.5	22.3	20.9	9.3	6.6	25.9	25.8	27.1	28.3	22	35.8	41.8	43.6	29.6	16	11.4	16.7	12.3	6.5	10.5
AgB01	4243984	4250063	AgB01_g283_t04	-	1374	3	Leucine aminopeptidase 1			N	N	N	31.4	3.4	5.3	6.8	7.7	24.5	12.7	12.1	6.2	4.6	21.1	17.9	14.3	20.7	17.8	24.8	26.2	36.7	24.1	13.5	10	20.1	10.2	5.4	8.5
AgB01	4243984	4250063	AgB01_g283_t05	-	1374	4	Leucine aminopeptidase 1			N	N	N	31.4	3.4	5.3	6.8	7.7	24.5	12.7	12.1	6.2	4.6	21.1	17.9	14.3	20.7	17.8	24.8	26.2	36.7	24.1	13.5	10	20.1	10.2	5.4	8.5
AgB01	4243984	4250063	AgB01_g283_t06	-	3083	5	Leucine aminopeptidase 1			N	Y	Y	27.7	3.3	4.9	7.2	7.4	22.9	12.3	11.6	4.9	3.6	13.7	13.4	13.8	15.1	11.9	19.2	22	24.2	16.8	9.7	6.8	10.1	6.6	3.5	5.8
AgB01	4243984	4250066	AgB01_g283_t07	-	1799	6	Leucine aminopeptidase 1			N	N	N	46.6	5.3	8.4	12.3	12.5	38.6	20.6	19.5	8.3	6.1	23.4	23	23.7	25.8	20	32.3	36.8	40.2	26.9	15	10.8	16.3	11.3	5.9	9.8
AgB01	4250876	4255048	AgB01_g284_t01	-	600	5	Leucine aminopeptidase 1	SL		N	Y	Y	91.3	11.2	25.9	39.1	32.3	115.8	51.3	51.4	17.5	14.5	41.3	42.3	30	55.7	50.1	57.7	47.1	57.6	43.7	23.5	15.4	5.8	11.9	7.2	12.6
AgB01	4255800	4264666	AgB01_g285_t01	-	3424	10	putative succinyl- ligase subunit		Telo	N	N	N	11	2.3	5.6	2	3.2	16.3	18.5	17.7	9.9	12.3	49.8	35.1	39.6	45.3	84.8	69.2	58.2	54.4	45.8	34.1	35.6	13.1	14.4	18.5	1
AgB01	4255800	4266838	AgB01_g285_t02	-	5067	10	Succinyl-CoA ligase ADP-forming subunit beta, partial	SL	Telo	N	N	Y	7.6	0.8	3.5	1.4	2.2	11.2	12.6	12	6.8	9.5	36.4	25.6	27.5	33	61.7	50.1	40.6	38.6	32.1	24.3	25.4	9.2	10	12.9	0.7
AgB01	4255800	4275530	AgB01_g285_t03	-	3973	14	Succinyl-CoA ligase ADP-forming subunit beta, partial	SL	Telo	N	Y	N	9.3	1	4.4	1.7	2.7	14.2	16	15.3	8.6	12	46.1	32.5	35	42	78.4	63.7	51.7	49.1	40.9	30.8	32	11.7	12.7	16.4	0.9
AgB01	4270876	4275691	AgB01_g285_t04	-	937	4	hypothetical protein			N	N	N	0.2	0	0.1	0	0	0	0.1	0	0.1	0	0	0.1	0.5	0.2	0.3	0	0	0	0.1	0	0.1	0	0.2	0	0
AgB01	4270876	4277037	AgB01_g285_t05	-	1133	5	hypothetical protein			N	N	N	0.1	0	0.1	0.1	0	0	0.1	0	0.1	0	0.7	0.9	0.8	0.8	1.3	0.9	0.4	0.7	0.3	0.7	0.8	0	0.6	0	0.2
AgB01	4274951	4277005	AgB01_g285_t06	-	740	3	hypothetical protein			N	N	N	0.1	0.1	0	0.2	0.1	0	0.1	0	0.1	0	1.1	1.3	0.6	1.1	2.1	1.4	0.7	1.1	0.5	1.1	1.5	0	1.9	0.3	0.2
AgB01	4277623	4280083	AgB01_g286_t01	-	653	3	cholinesterase			N	N	N	0	0	0.1	0	0	0.1	0.4	0.6	0.5	0.2	1.9	1.4	1.2	0.9	0.5	0.4	0.4	4.9	8.8	12.7	7.5	2.6	3.2	0.7	10
AgB01	4277623	4280150	AgB01_g286_t02	-	1579	2	cholinesterase			N	Y	Y	0	0	0.1	0	0	0.1	0.2	0.3	0.8	0.2	1.2	0.9	0.6	0.6	0.5	0.3	0.2	4.4	8.2	11.6	6.6	1.1	2.3	0.4	5.5
AgB01	4280958	4281817	AgB01_g287_t01	.	860	1	Long-chain-fatty-acid--CoA ligase 4			N	Y	Y	7.3	1.2	4.1	1.6	1.2	5.8	3.8	4.4	3.1	2.8	1.4	2.4	1.5	2.5	4.2	6.8	7.4	6.5	8	9.5	7.1	18.1	5	1.5	1.1
AgB01	4281877	4285652	AgB01_g288_t01	-	2040	4	cholinesterase			N	Y	N	0	0.1	0.1	0	0.2	0.2	0.3	0.3	0.1	0.1	0.8	1	0.6	1.2	0.7	0.4	0.2	5.9	9.2	15	6.5	2.5	2.8	0.7	12.1
AgB01	4281877	4286969	AgB01_g288_t02	-	884	6	cholinesterase			N	N	N	0	0.2	0.3	0	0.6	0.2	0.6	0.6	0.2	0.2	1.7	2.5	1.8	2.7	1.3	1.1	0.2	11.7	18.7	29	13.3	3.9	6.5	1.7	27.3
AgB01	4281877	4287031	AgB01_g288_t03	-	2379	5	cholinesterase			N	N	Y	0	0.1	0.1	0	0.2	0.1	0.2	0.2	0.1	0.1	0.7	1.1	0.7	1.1	0.5	0.4	0.1	4.9	8.2	12.7	5.6	2.2	2.5	0.7	11
AgB01	4281877	4287031	AgB01_g288_t04	-	946	5	cholinesterase			N	N	N	0	0.2	0.4	0	0.5	0.2	0.5	0.5	0.2	0.3	1.7	2.8	1.7	2.8	1.3	1.1	0.2	11.6	18.5	28.5	12.9	5.5	6.2	1.6	27.1
AgB01	4287365	4292854	AgB01_g289_t01	-	491	3	Cholinesterase			N	Y	N	0	0	0	0	0.4	0	0	0	0	0	0	0	0	0.1	0.2	0.1	0.1	11.7	15	20.5	10.9	3.5	5.3	0.9	24
AgB01	4288478	4292854	AgB01_g289_t02	-	491	3	Cholinesterase			N	N	N	0	0	0	0	0.4	0	0	0	0	0	0	0	0	0.1	0.2	0.1	0.1	11.7	15	20.5	10.9	3.5	5.3	0.9	24
AgB01	4288478	4293134	AgB01_g289_t03	-	495	3	Cholinesterase			N	N	N	0	0	0	0	0.4	0	0	0	0	0	0	0	0	0.1	0.2	0.1	0.1	11.7	14.9	20.5	10.9	3.5	5.3	0.9	23.8
AgB01	4289395	4292837	AgB01_g289_t04	-	1344	5	Cholinesterase			N	N	N	0	0	0	0	0.2	0	0	0	0	0	0	0	0	0	0.1	0	0.2	7.8	10.6	14	6.6	1.3	3.2	0.7	15.7
AgB01	4289395	4292854	AgB01_g289_t05	-	1093	6	Cholinesterase			N	N	N	0	0	0	0	0.2	0	0	0	0	0	0	0	0	0	0.1	0	0.2	10	13.2	17.4	8.6	1.6	4	0.8	19.6
AgB01	4289395	4293137	AgB01_g289_t06	-	1368	5	Cholinesterase			N	N	Y	0	0	0	0	0.2	0	0	0	0	0	0	0	0	0	0.1	0	0.2	8	10.5	14	6.9	1.3	3.3	0.7	15.6
AgB01	4289395	4293137	AgB01_g289_t07	-	1100	6	Cholinesterase			N	N	N	0	0	0	0	0.2	0	0	0	0	0	0	0	0	0	0.1	0	0.2	9.9	13.1	17.4	8.6	1.6	4	0.8	19.4
AgB01	4294305	4304084	AgB01_g290_t01	-	2884	13	liver carboxylesterase 2			N	N	N	0.8	2	0.8	0	0.3	0	0.1	0	0.2	0.3	0.3	0.1	0.1	0.4	0.7	1	1.2	8.6	7.5	5.3	6.8	11.4	3.3	0.9	19.7
AgB01	4294305	4304097	AgB01_g290_t02	-	2969	13	Carboxylesterase 2			N	N	N	0.9	2	0.8	0	0.3	0	0.1	0	0.2	0.3	0.3	0.1	0.1	0.4	0.7	0.9	1.3	8.6	7.5	5.3	6.8	11.1	3.2	0.8	20.2
AgB01	4294305	4304315	AgB01_g290_t03	-	2873	13	liver carboxylesterase 2			N	N	N	0.8	2.1	0.9	0	0.3	0	0.1	0	0.2	0.3	0.3	0.1	0.1	0.4	0.7	1	1.2	8.4	6.9	4.9	6.4	10.8	3.2	0.9	19.1
AgB01	4294305	4317269	AgB01_g290_t04	-	4481	22	liver carboxylesterase 2	SL		N	N	N	2	3.8	0.8	0	0.2	0.2	0.1	0.1	0.3	0.2	0.3	0.1	0.1	0.5	2.3	4.1	11.3	13.2	14.8	14.6	11.8	8.9	2.4	0.6	12.9
AgB01	4294305	4317746	AgB01_g290_t05	-	4967	22	liver carboxylesterase 2	SL		N	N	Y	2.1	3.7	0.8	0	0.2	0.2	0.1	0.1	0.3	0.2	0.3	0.1	0.1	0.5	2.2	4	11	12.5	14.1	14.2	11.5	8	2.2	0.5	11.7
AgB01	4305318	4313543	AgB01_g290_t06	-	2496	9	liver carboxylesterase 2	SL		N	N	N	3.4	5.3	0.6	0	0.2	0.4	0.1	0.2	0.4	0	0.2	0.1	0.1	0.5	4	7.5	21.9	16.8	21.9	24.6	17.3	3.5	0.8	0	0.2
AgB01	4305318	4322808	AgB01_g290_t07	-	2167	9	liver carboxylesterase 2	SL		N	Y	N	3.7	5.7	0.6	0	0.2	0.4	0.1	0.2	0.2	0	0.2	0	0.1	0.4	4.4	8	22.1	17.8	23.8	26.2	18.2	3.2	0.9	0	0.2
AgB01	4333880	4335859	AgB01_g291_t01	-	1112	3	hypothetical protein	SL		N	N	N	30.5	45.7	4.6	0.1	2.7	0.1	0	0	0	0.1	0.7	0.8	0.2	0.8	1.7	1.8	1.2	5.7	3.4	0.4	1.2	0	0.5	0.1	0.5
AgB01	4333880	4337257	AgB01_g291_t02	-	1221	3	hypothetical protein	SL		N	Y	Y	26	39.3	4	0.1	1.8	0.1	0	0	0	0.1	0.4	0.8	0.2	0.8	1.7	1.8	1.2	5.1	3.2	0.3	1.1	0	0.6	0.1	0.5
AgB01	4337470	4345712	AgB01_g292_t01	-	4107	6	putative palmitoyltransferase zdhhc24			N	N	N	9.8	9.4	3.1	2.6	2	8.8	9.9	9.2	2	3.5	10.1	7.5	4.8	8.2	9.5	5.4	3.8	5	4.9	5.7	6.1	5.5	3.8	2.8	0.8
AgB01	4337470	4347361	AgB01_g292_t02	-	4165	7	putative palmitoyltransferase zdhhc24			N	N	Y	10.4	10.1	3.1	2.6	2	8.9	9.9	9.1	2.1	3.5	10.1	7.4	4.8	8.1	9.4	5.3	3.9	5	4.9	5.6	6.1	5.4	3.7	2.8	0.8
AgB01	4337470	4348016	AgB01_g292_t03	-	4130	8	putative palmitoyltransferase zdhhc24			N	Y	N	9.9	9.6	3.1	2.6	2	8.8	9.9	9.1	2	3.5	10.2	7.5	4.8	8.2	9.4	5.3	3.7	5	4.8	5.6	6.1	5	3.8	2.8	0.8
AgB01	4349167	4357072	AgB01_g293_t01	-	2753	7	Pyruvate dehydrogenase phosphatase regulatory subunit	SL		N	Y	Y	4.5	0.8	2.5	2.5	1.3	8.2	5.2	5.6	3	2.5	7.7	5.9	4.7	8	8.3	9.1	4.5	6.7	5.3	5.4	4.8	1.9	2.9	3.1	2.3
AgB01	4359564	4361897	AgB01_g294_t01	-	1602	2	homocysteine s-methyltransferase 3			N	Y	Y	0	0.1	0.8	0.2	0.3	0.3	0.3	0.3	0.2	0.4	1.8	0.8	0.5	0.9	0.6	0.4	0.1	0.3	0.1	0.6	1.8	0	0.8	0.6	0.2
AgB01	4369671	4380636	AgB01_g295_t01	+	4061	9	liver carboxylesterase 2	SL		N	N	N	0.1	0.1	0	0	0	0.1	0.1	0.1	0.3	0.2	1.3	0.8	0.5	1.1	6.8	8.6	9.3	7.2	1.6	1	1.9	3.4	0.9	0.7	0
AgB01	4370074	4380636	AgB01_g295_t02	+	4805	7	liver carboxylesterase 2			N	Y	Y	0.1	0.1	0	0	0	0.1	0.1	0.1	0.3	0.2	1.1	0.7	0.4	0.8	4.9	6.1	5.8	5.3	1.3	0.8	1.6	2.9	0.8	0.6	0
AgB01	4370645	4371942	AgB01_g295_t03	+	1298	1	liver carboxylesterase 2			N	N	N	0	0	0	0	0	0	0	0	0	0	0.1	0	0	0.4	1.4	3	1.1	3.8	1	0.1	0	0	0	0	0
AgB01	4375864	4376289	AgB01_g295_t04	+	426	1	hypothetical protein			N	N	N	0	0.1	0	0	0	0	0	0	0	0	0	0	0	0.1	2	3.8	5.6	4.3	0	0	0.1	0	0	0	0
AgB01	4376531	4380636	AgB01_g295_t05	+	4106	1	hypothetical protein			N	N	N	0.1	0.1	0	0	0	0.1	0.1	0.1	0.3	0.2	1.2	0.8	0.2	0.7	3.6	3.2	2.8	2.9	1	0.9	1.8	3.4	0.8	0.7	0
AgB01	4380734	4399424	AgB01_g296_t01	-	3145	16	sulfhydryl oxidase 1	SL		N	N	N	45	18	44.6	58.5	39.7	91.3	113	111.1	59.8	24.6	71.4	62	74	105.2	60.4	65.4	40.2	23.9	15.6	14	19.3	33.5	29.8	22.5	10.7
AgB01	4380734	4399424	AgB01_g296_t02	-	3127	16	sulfhydryl oxidase 1	SL		N	N	N	45.2	18.2	44.9	58.4	39.7	92.6	114.9	112.2	60.3	24.8	71.8	62.2	71.9	105.6	60.2	64.6	38.9	23.8	15.3	13.7	19	31	29.8	22.6	10.9
AgB01	4380734	4399424	AgB01_g296_t03	-	3178	16	sulfhydryl oxidase 1	SL		N	N	N	44.6	17.9	44.2	57.8	39.2	90.3	111.8	110.1	59.2	24.5	70.9	61.5	73.1	104.1	60	64.9	40	23.8	15.5	13.9	19.2	32.1	29.5	22.2	10.6
AgB01	4383775	4399424	AgB01_g296_t04	-	3433	16	sulfhydryl oxidase 1	SL		N	N	N	41.2	16.4	41	0	36.4	83.7	103.7	102	55	23	67.4	57.3	68.4	96.9	54.2	59.3	37.1	21.5	14.2	12.6	16.8	29.7	27.2	20.6	9.8
AgB01	4386024	4399424	AgB01_g296_t05	-	2739	15	sulfhydryl oxidase 1	SL		N	N	N	51.8	20.7	51.4	67.2	45.7	105.1	130.5	128.3	69	29	85.2	74.4	88.4	123.7	68.4	74.6	45.5	26.9	17.8	15.5	20.8	36.6	34.1	25.9	12.4
AgB01	4386024	4399424	AgB01_g296_t06	-	2772	15	sulfhydryl oxidase 1	SL		N	N	N	51.2	20.6	50.8	66.4	45.1	103.8	128.8	127	68.2	28.8	84.3	73.6	87.2	122.2	67.8	73.9	45.2	26.7	17.6	15.4	20.6	34.9	33.7	25.6	12.3
AgB01	4388748	4399424	AgB01_g296_t07	-	2224	14	Sulfhydryl oxidase 1	SL		N	Y	N	66.1	25.5	64.2	84.7	57.5	126.5	161.3	157.1	90.8	36.8	103.3	91.7	109.5	143	80.2	89.5	56.8	32.1	20.6	18.2	23.5	50.5	44.6	33.1	16.6
AgB01	4388748	4399424	AgB01_g296_t08	-	2154	14	Sulfhydryl oxidase 1	SL		N	N	N	66.6	26	65.3	85.5	58.4	130.5	165.3	160.3	91.2	37.6	104.9	93.1	107.4	146.5	81.3	90	55.7	32.5	20.4	18.2	23.5	45.7	44.5	33	16.7
AgB01	4388748	4401595	AgB01_g296_t09	-	4343	14	Sulfhydryl oxidase 1	SL		N	N	N	33.3	13	32.4	42.7	29.2	64.3	81.2	79.2	45.2	18.7	52.1	46.5	55.1	73	40.8	45.6	28.9	16.4	10.6	9.5	12.1	24.7	22.2	16.4	8.2
AgB01	4388748	4401595	AgB01_g296_t10	-	4377	14	Sulfhydryl oxidase 1	SL		N	N	Y	33.8	13.1	32.7	42.8	29.1	65	82.8	80.2	46.3	18.7	52.5	46.7	53.9	72.7	40.5	44.7	28	16.2	10.3	9.1	11.8	23.7	22.6	16.8	8.5
AgB01	4421728	4433318	AgB01_g297_t01	-	3355	12	DNA repair protein RAD2			N	N	N	4.8	2.1	2.4	0.3	0.9	5.6	4	4.3	2.8	1.9	6.8	7.6	8.3	12.1	10.5	13.9	12.5	22.6	21.7	24.4	23.1	23.2	2	1.6	2
AgB01	4421728	4438475	AgB01_g297_t02	-	3374	19	DNA repair protein RAD2	SL		N	N	N	6.2	2.4	3	0.4	1.2	8.4	5.5	5.6	3.8	2.6	8.5	9	9.9	16	13.9	18.3	14.7	26.4	25.7	27.9	26.9	23.6	2.4	1.9	2.4
AgB01	4421728	4438475	AgB01_g297_t03	-	3762	18	DNA repair protein RAD2	SL		N	N	Y	5.7	2.3	2.8	0.4	1.1	7.6	4.9	5	3.4	2.3	7.5	8	8.8	14.4	12.5	16.4	13.2	23.6	23	24.7	24.1	21.1	2.1	1.7	2.1
AgB01	4421728	4438475	AgB01_g297_t04	-	3236	18	DNA repair protein RAD2	SL		N	Y	N	6	2.2	2.9	0.4	1.2	8	5.4	5.5	3.7	2.4	8.3	8.6	9.7	15.8	13.8	18.1	14.2	25.9	25.3	27.4	26.3	23.5	2.4	1.9	2.3
AgB01	4444782	4490524	AgB01_g298_t01	-	8239	36	E3 ubiquitin-protein ligase TRIP12	SL	Telo	N	Y	Y	49.1	60	22.9	11.6	10.4	64.6	26.8	27.8	10.6	9.1	23.1	29.4	34.6	28.1	17.2	16.2	16.1	12.1	15.4	28	28.6	27.7	5.1	5.7	9.6
AgB01	4490050	4493866	AgB01_g299_t01	+	600	4	ATP-dependent RNA helicase DDX3X	SL		N	Y	Y	50	5.7	49.8	90.7	44.5	104.2	37.7	36.6	52.8	36.3	13.1	22.6	39.6	23.6	63.8	91.4	126.7	64	69.1	84.4	45.3	40.3	15.4	16.5	25.9
AgB01	4496630	4503930	AgB01_g300_t01	+	2038	9	ATP-dependent RNA helicase DDX3X			N	Y	Y	104.4	40.8	50.3	77.6	41	97.3	60.5	60.7	39.4	14.1	8.4	14.1	24.6	23.3	35.4	56.6	66	52	55.3	63.2	38.5	35.6	12.6	13.4	17.2
AgB01	4508455	4514450	AgB01_g301_t01	+	2256	5	Motile sperm domain-containing protein 1	SL		N	Y	Y	36.4	3.5	13	15.2	9.9	75.9	87.5	81.6	24.2	36.6	144.4	168.8	155.7	131.2	66.2	48.3	37.1	19.1	16.1	18.8	26	14.6	15.7	10.2	6.3
AgB01	4511684	4512700	AgB01_g301_t02	+	683	2	Motile sperm domain-containing protein 1			N	N	N	40.7	3.3	14.7	15.9	13.3	87.5	110	98.1	17.6	8.7	30.8	28.5	35.4	63.6	22.6	19.9	15.3	13.5	7.3	10.2	16.7	12.7	10.1	6.2	4.7
AgB01	4514918	4521642	AgB01_g302_t01	-	1599	9	trehalase			N	Y	Y	42.5	203.3	20.2	0.7	4.5	0.4	0.3	0.3	0.8	0.7	1.2	1.3	1.8	1.4	2.1	1.6	2.6	0.8	0.5	0.3	0.3	0	0.9	0.4	0.3
AgB01	4525726	4529705	AgB01_g303_t01	+	1484	7	Trehalase			N	N	Y	20.9	77.6	6.7	0.1	2.1	0.1	0	0	0.1	0.1	0.1	0	0.7	0.2	0.9	0.6	0.1	0.1	0	0	0	0	0.3	0	0
AgB01	4525726	4533188	AgB01_g303_t02	+	1034	5	Trehalase			N	N	N	23.6	75.6	5.7	0.1	2.4	0.1	0.1	0.1	0.2	0	0.1	0.4	0.1	0.4	0.8	1.1	1.2	0.1	0	0	0.4	0	0.2	0	0.1
AgB01	4525726	4533188	AgB01_g303_t03	+	1025	5	Trehalase			N	Y	N	23.7	75.9	5.7	0.1	2.5	0.1	0.1	0.1	0.2	0	0.1	0.4	0.1	0.5	0.9	1.2	1.2	0.1	0	0	0.4	0	0.2	0	0.1
AgB01	4527142	4529705	AgB01_g303_t04	+	863	5	trehalase			N	N	N	24.3	89.2	7.4	0	2.5	0.1	0	0	0	0	0.1	0.1	1.3	0.2	0.8	0.4	0.1	0	0	0	0	0	0.3	0	0
AgB01	4532317	4533188	AgB01_g303_t05	+	872	1	Trehalase			N	N	N	10.9	26.6	2.4	0	0.8	0	0	0.1	0	0	0.7	1.3	0.9	0.5	0.2	0.5	0.7	0	0	0	0.7	0	0.1	0	0
AgB01	4535354	4537122	AgB01_g304_t01	+	1769	1	Dual specificity protein phosphatase 18	SL		N	N	N	0.4	0.7	0.3	0	1.6	1.2	2.6	2	1.3	3.7	13.7	23.7	23.2	11.6	8.8	5.7	8.2	0.3	0.1	0.1	0	0	25.6	26.3	9.7
AgB01	4535542	4542540	AgB01_g304_t02	+	4184	4	Dual specificity protein phosphatase 18	SL		N	Y	Y	0.3	0.5	0.2	0.1	6.8	4.4	7.2	5.7	3	5.5	19	28.1	24.3	19.2	12.4	9.7	9.4	0.8	0.2	0.2	0.5	0.4	55.2	47.7	19.7
AgB01	4547231	4556169	AgB01_g305_t01	-	2723	6	neuronal calcium sensor 1	SL		N	N	N	1.4	4.8	2.6	0.7	1.1	0.9	0.7	0.7	2.5	2.3	1	0.7	1.2	1.2	7.1	5.7	3.9	2.6	0.6	1	15.7	80	2.2	2.2	0.1
AgB01	4547231	4557562	AgB01_g305_t02	-	4026	6	neuronal calcium sensor 1	SL		N	N	N	2.9	11.3	2.9	0.6	0.9	0.7	0.5	0.5	1.8	1.7	0.7	0.5	1.1	1	5.1	4.2	2.9	1.9	0.4	0.7	11.4	56.2	1.5	1.5	0.1
AgB01	4547231	4574074	AgB01_g305_t03	-	20563	7	neuronal calcium sensor 1	SL		N	Y	Y	3.4	14	2.3	0.1	0.2	0.2	0.1	0.1	0.4	0.3	0.2	0.2	0.3	0.3	1.1	0.9	0.6	0.4	0.1	0.1	2.4	11.2	0.3	0.3	0
AgB01	4550158	4558379	AgB01_g305_t04	-	2992	5	neuronal calcium sensor 1	SL		N	N	N	5.6	20.8	3.5	0.5	0.5	0.6	0.4	0.3	1.6	0.5	0.1	0.2	0.7	0.4	2	2	1.3	0.7	0.1	0.2	4.1	11	0.4	0.4	0
AgB01	4551691	4558379	AgB01_g305_t05	-	2925	4	neuronal calcium sensor 1	SL		N	N	N	6	21.1	3.3	0.4	0.5	0.5	0.3	0.2	1.5	0.5	0.1	0.2	0.5	0.4	1.7	1.6	1.1	0.5	0.1	0.2	3.3	8.9	0.3	0.3	0
AgB01	4585639	4589921	AgB01_g306_t01	-	3606	2	Death-inducer obliterator 1			N	N	N	0.7	1.2	0.1	0	0.2	0.5	0.1	0.1	0.1	1	3.7	2.9	1.3	3.5	8.9	5.5	2.6	11.7	11.4	11.5	8.6	10.5	1.2	0.4	1
AgB01	4585639	4601892	AgB01_g306_t02	-	5868	16	death-inducer obliterator 1			N	N	N	7.4	8.1	2.1	0.4	2	4.6	3	2.4	1.4	1.6	4.4	5.4	13.9	7.2	10.8	10.2	24.8	15.5	16.4	16.6	11.6	15	1.3	0.7	2
AgB01	4585639	4622943	AgB01_g306_t03	-	9451	40	death-inducer obliterator 1	SL	Telo	N	N	N	8.5	12.6	2.7	0.4	2.2	5.8	2.9	2.9	1.6	2.1	4.7	6.2	13.8	8.1	12.7	12.4	24.2	19.8	20.7	21.6	14.2	17	1.3	0.7	2.2
AgB01	4585639	4622943	AgB01_g306_t04	-	9526	40	death-inducer obliterator 1	SL	Telo	N	N	Y	8.4	12.5	2.6	0.4	2.2	5.7	2.8	2.8	1.6	2.1	4.7	6.1	13.7	8	12.6	12.3	23.9	19.6	20.5	21.4	14.1	16.9	1.3	0.7	2.2
AgB01	4585639	4622965	AgB01_g306_t05	-	9476	40	death-inducer obliterator 1	SL	Telo	N	N	N	8.5	12.5	2.7	0.4	2.2	5.7	2.9	2.9	1.6	2.1	4.7	6.2	13.8	8.1	12.7	12.4	24.2	19.8	20.7	21.6	14.2	17	1.3	0.7	2.2
AgB01	4595943	4622943	AgB01_g306_t06	-	4850	30	death-inducer obliterator 1	SL	Telo	N	Y	N	11.5	19.2	3.9	0.6	2.8	8.2	3.6	3.9	2.3	2.6	4.9	6.8	14.6	9.4	14.3	15.1	24.5	24.3	25.5	27	17.2	17.8	1.2	0.8	2.7
AgB01	4603641	4622943	AgB01_g306_t07	-	3488	24	death-inducer obliterator 1	SL	Telo	N	N	N	10.2	19	3.4	0.5	2.7	7.2	2.4	3.4	2	2.9	5.2	7.3	13.8	9.3	15.7	15.7	23.3	26.1	27.3	29.4	18.2	18.3	1.2	0.8	2.7
AgB01	4628747	4630441	AgB01_g307_t01	-	252	2	cral-trio domain-containing protein			N	Y	Y	0	0	0	0	0	0	0	0	0	0	0	0	0	0	0	0	0	0	0	0	0.2	0	0	0	0
AgB01	4632064	4638017	AgB01_g308_t01	+	728	4	cral-trio domain-containing protein		Telo	N	Y	Y	0	0	0	0.7	0.8	0	0	0	0	0	0	0	0	0.2	0.1	0	0.1	0	0	0	1.6	0	0	0	0
AgB01	4642922	4646200	AgB01_g309_t01	-	2610	2	Zinc transporter ZIP14			N	Y	Y	0.1	0.1	0	0.1	0.1	0	0	0	1.7	1	0.1	0.1	0.2	0.2	1.3	1.7	1.8	1.2	0.8	1.1	3.5	0.7	0.9	1.2	2.8
AgB01	4642922	4650567	AgB01_g309_t02	-	2551	7	Zinc transporter ZIP14	SL		N	N	N	0.1	0	0	0.1	0.2	0	0	0	3	2.3	0.1	0.1	0.5	0.5	2.6	3.4	2.5	2.1	1.3	1.5	4.6	1.4	1.4	2	2.5
AgB01	4642922	4650567	AgB01_g309_t03	-	2551	7	Zinc transporter ZIP14	SL		N	N	N	0.1	0	0	0.1	0.2	0	0	0	3	2.3	0.1	0.1	0.5	0.5	2.6	3.4	2.5	2.1	1.3	1.5	4.6	1.4	1.4	2	2.5
AgB01	4645496	4646723	AgB01_g309_t04	-	613	2	Zinc transporter ZIP14			N	N	N	0.1	0.3	0	0	0.7	0	0	0.1	2	0.6	0	0.2	0.5	0.2	1.6	2.4	2	2.1	0.8	1.4	3.8	0	0.8	1.5	2.7
AgB01	4666355	4680303	AgB01_g310_t01	+	3543	7	39s ribosomal protein			N	N	Y	7.1	5	1.9	0.6	1.4	3.4	2.3	2.1	1.2	1.9	11.3	9.4	4.8	11.8	20.3	19.2	12.7	16.5	11.6	7.4	6.2	6.8	4.3	2.7	1.3
AgB01	4671474	4674915	AgB01_g310_t02	+	408	3	39s ribosomal protein			N	N	N	8.9	2.9	1.4	1.2	2.6	5.7	1.9	3.4	1.9	1.6	11.4	7.4	3.9	14.7	18.1	16.8	7	14.2	12.5	5.3	4.4	8.5	4.1	3.1	0.8
AgB01	4671474	4675800	AgB01_g310_t03	+	547	4	39s ribosomal protein			N	Y	N	16.8	4.5	5.2	2.4	4.6	15.2	7.7	7.1	4	3.7	23.4	25.9	8.5	32.1	40.5	42.2	19.5	27.5	22.6	11.4	8.9	9.5	6	3.7	1.3
AgB01	4671474	4680303	AgB01_g310_t04	+	2971	3	39s ribosomal protein			N	N	N	3.4	1	1.2	0.4	0.9	2	1.6	1.5	0.9	1.6	11	7.4	4.5	10.2	18.7	16.9	11.6	16.6	11.3	7.4	6.3	7.6	4.5	3	1.4
AgB01	4680360	4687669	AgB01_g311_t01	+	1981	3	Zinc finger protein 706	SL		N	Y	N	53	9.4	24.7	58.8	43.5	25.4	29.5	25.5	117.9	111.1	103.6	54.5	37.2	49	19.9	11.5	9.6	17.1	13.6	9.1	23.5	22.7	295.7	198.2	175.2
AgB01	4680360	4695173	AgB01_g311_t02	+	7166	6	Zinc finger protein 706	SL	Telo	N	N	N	28.9	15.9	13.1	23.5	16.6	14.3	14.3	12.9	38.5	45.1	67.8	41.6	29.9	36.7	31.7	33.1	30.1	45.1	30.2	15.8	19.8	31.6	120.5	81	70.8
AgB01	4680360	4695173	AgB01_g311_t03	+	14219	2	Zinc finger protein 706, partial	SL	Telo	N	N	Y	15.3	8.5	6.9	11.7	8.4	7.3	7.2	6.5	19.1	28.5	42.3	26.7	18.5	22.2	20.5	20.6	18.2	26.5	18.6	10.3	11.9	16.9	61.8	42.6	38.2
AgB01	4695296	4698618	AgB01_g312_t01	-	1757	5	p40		Telo	N	Y	Y	201.6	314.6	38.6	2.1	33.8	0.5	0.4	0.1	2.3	2.2	0.3	0.4	0.6	0.5	0.7	0.6	0.6	0.3	0.7	0.5	0.9	1	4.5	0.2	1.1
AgB01	4699641	4700276	AgB01_g313_t01	-	636	1	hypothetical protein			N	Y	Y	1	9	1.4	0.3	0	0	0.1	0	0	0	0.1	0	0	0	0.2	0	0	0.1	0.1	0.2	0.2	0	0	0	0
AgB01	4705767	4717167	AgB01_g314_t01	+	3006	9	putative oxidoreductase			N	N	N	0	0.1	7	0	0.3	1.6	6.5	5.4	1.8	2	3.8	3.5	3	6.9	3.8	4	1.3	0.9	1.1	1.2	5.6	2.3	0.6	0.8	0
AgB01	4705767	4717167	AgB01_g314_t02	+	3006	9	putative oxidoreductase			N	N	N	0	0.1	7	0	0.3	1.6	6.5	5.4	1.8	2	3.8	3.5	3	6.9	3.8	4	1.3	0.9	1.1	1.2	5.6	2.3	0.6	0.8	0
AgB01	4705767	4717167	AgB01_g314_t03	+	3006	9	putative oxidoreductase			N	N	N	0	0.1	7	0	0.3	1.6	6.5	5.4	1.8	2	3.8	3.5	3	6.9	3.8	4	1.3	0.9	1.1	1.2	5.6	2.3	0.6	0.8	0
AgB01	4706330	4717167	AgB01_g314_t04	+	3299	8	putative oxidoreductase			N	Y	Y	0	0.1	6.3	0	0.3	1.4	5.9	4.9	1.6	1.5	3.1	2.5	2.2	5.8	2.9	3.3	1.1	0.8	1	1.1	4.8	2.6	0.5	0.8	0
AgB01	4708672	4717167	AgB01_g314_t05	+	3006	9	putative oxidoreductase			N	N	N	0	0.1	7	0	0.3	1.6	6.5	5.4	1.8	2	3.8	3.5	3	6.9	3.8	4	1.3	0.9	1.1	1.2	5.6	2.3	0.6	0.8	0
AgB01	4719411	4725243	AgB01_g315_t01	+	1342	6	hypothetical protein	SL		N	Y	Y	0.1	0	0	0	0	0.1	0	0	0	0	0	0.1	0.2	0.3	0.1	0.1	0	0.1	0	0.1	2.4	7.7	0.9	0	0
AgB01	4725522	4738050	AgB01_g316_t01	-	2388	11	Fibroleukin	SL		N	Y	N	24	7.4	4.4	10.5	8.8	16.1	15.4	13.7	9.6	12.1	8.9	10.3	12.5	15.6	17.1	16.4	21.1	32.8	48	26.6	13.7	4.3	31.8	14.7	1.9
AgB01	4725522	4741242	AgB01_g316_t02	-	7717	9	Fibroleukin	SL		N	N	Y	8.4	3.3	1.9	3.8	3.1	5.4	5.4	4.8	3.1	5.5	4.4	4.8	7.4	6.1	7.6	6.7	12.6	13.1	19	10.4	5.6	3.1	13.8	6.4	0.8
AgB01	4725522	4742140	AgB01_g316_t03	-	3858	10	Fibroleukin	SL		N	N	N	17	9.6	4.9	7.5	5.9	10.9	10.8	9.5	6.2	11.1	8.6	9.5	14.6	12	15.1	13.3	25.2	26	37.8	20.7	11.1	6.3	27.5	12.6	1.7
AgB01	4762350	4785051	AgB01_g317_t01	-	1453	12	hypothetical protein			N	N	N	0.2	0.1	0.2	0	1.4	0.7	0.2	0.1	0	0	0.2	0.3	0.1	0.3	0.6	0.4	0	1.6	1.5	0.9	0.7	7.1	25.2	3.5	81.2
AgB01	4769567	4785055	AgB01_g317_t02	-	1008	8	hypothetical protein			N	N	N	0.2	0.2	0.1	0	1.1	0.5	0.2	0	0	0	0.3	0.3	0.1	0.2	0.7	0.3	0	1.3	0.3	0.5	0.5	8.6	25.8	3.9	86.2
AgB01	4774103	4785055	AgB01_g317_t03	-	2116	12	hypothetical protein			N	Y	Y	0.1	0.1	0.1	0	1	0.6	0.2	0.1	0	0	0.2	0.3	0	0.2	0.6	0.4	0.1	1.4	1.7	1.4	0.8	4.9	24.7	3.2	73.6
AgB01	4770717	4787799	AgB01_g318_t01	-	1303	2	Diacylglycerol kinase theta			N	N	N	0.4	1	0.9	2.8	1.6	0.8	1.3	0.7	0.5	0.5	2.2	3	2.3	3.5	3.5	5.1	3.6	2	1.4	3.5	7.9	6.6	17	6.9	17.6
AgB01	4770717	4821467	AgB01_g318_t02	-	3323	23	Diacylglycerol kinase theta			N	N	N	1.2	0.6	12.2	5.7	2.3	6.1	4.4	4.4	4.9	2.7	1.3	1.7	2.6	3.1	5.3	5.3	2.6	1.9	2.3	13	18.8	25.5	7.8	4	6.4
AgB01	4785632	4787799	AgB01_g318_t03	-	1618	2	Diacylglycerol kinase theta			N	Y	N	0.5	0.8	1	2.7	1.3	0.8	1.1	0.6	0.7	1.1	3.5	4	3.4	3.8	3.7	6.3	4.4	2.3	1.9	3.7	8.4	6.4	20.1	7.8	20.9
AgB01	4785632	4821467	AgB01_g318_t04	-	3638	23	Diacylglycerol kinase theta			N	N	N	1.1	0.5	11.3	5.4	2.2	5.7	4	4	4.6	2.8	2	2.2	3.1	3.3	5.2	5.9	3	2.1	2.4	12.2	18.1	23.8	9.9	4.7	8.8
AgB01	4791320	4821467	AgB01_g318_t05	-	6442	21	Diacylglycerol kinase theta			N	N	Y	0.6	0.4	5.6	2.2	0.9	2.8	1.9	2.1	2.4	1.8	0.8	0.7	1	1.3	2.3	1.9	0.5	0.9	1.1	8	12.1	16.6	1.1	1	0.9
AgB01	4791320	4821467	AgB01_g318_t06	-	5798	22	Diacylglycerol kinase theta			N	N	N	0.7	0.5	7.1	2.8	1	3.5	2.3	2.4	2.9	2.1	0.9	0.8	1.3	1.5	2.8	2.4	0.7	1	1.4	9.4	14.4	19.7	1.3	1.2	1
AgB01	4829690	4830129	AgB01_g319_t01	.	440	1	hypothetical protein			N	Y	Y	2.4	5.3	1.1	0	0.1	0	0	0	0.8	0.8	0.3	0.4	0	0.2	0	0.1	0	0	0	0	0.1	3.9	0.1	0	0
AgB01	4831518	4832186	AgB01_g320_t01	.	669	1	hypothetical protein			N	Y	Y	3.9	7.5	0.3	0	0	0.2	0	0	0.8	0.3	0	0.4	0.5	0.1	0.2	0	0.1	0	0	0	0.5	0	0.4	0	0.1
AgB01	4840108	4844022	AgB01_g321_t01	-	1707	6	RecName: Full=Ovarian abundant message protein; Short=Protein OAM		Telo	N	N	Y	59.6	6.8	51.1	24.4	20.2	3636.3	8716.8	7278.3	31.5	112.8	64.3	77.6	152.1	18	9.6	10	19.6	1.5	0.6	0.6	0.8	2	76.7	126.6	0.3
AgB01	4840108	4844022	AgB01_g321_t02	-	1599	6	RecName: Full=Ovarian abundant message protein; Short=Protein OAM		Telo	N	N	N	80.9	9.2	71.7	34.8	27.2	5188.8	12437.3	10255.1	39.2	151.7	81	83.9	175.4	22.8	11.4	13.4	23	1.9	0.8	0.9	0.8	2.2	99.6	170.5	0.4
AgB01	4840593	4844022	AgB01_g321_t03	-	1387	6	RecName: Full=Ovarian abundant message protein; Short=Protein OAM		Telo	N	Y	N	70.9	8.2	69	33.7	25	4984.8	12027.7	9643.1	32.2	177.4	102.7	115.1	261.3	27.7	13.7	16.1	31	2.2	0.8	1	0.8	1.2	71.3	140.3	0.3
AgB01	4841408	4843866	AgB01_g321_t04	-	1176	4	RecName: Full=Ovarian abundant message protein; Short=Protein OAM		Telo	N	N	N	47.3	5.9	48	23.2	17.2	3525.9	8540.1	6765.4	23.3	119.2	65.8	58.4	96.7	20.9	8.5	10.8	14.1	1.5	0.7	0.5	0.3	1.5	39.5	84	0.2
AgB01	4842325	4848351	AgB01_g322_t01	+	3467	7	ovarian abundant message protein		Telo	N	N	N	153.6	18.3	117.1	50.4	45.3	8978.1	18233.8	15538.1	271.8	163.2	203.3	217.3	212.3	42.2	12.2	10.4	14.7	1.7	0.8	0.7	0.8	0.5	104.4	150.1	0.3
AgB01	4844124	4848351	AgB01_g322_t02	+	4228	1	ovarian abundant message protein		Telo	N	N	Y	105.7	12.9	78.5	33.3	30.4	5950	12033.6	10305.3	193	134.5	241.4	224.6	210.8	52.2	17.1	14.8	13.5	1.3	0.7	0.5	0.5	0.4	70.1	98.3	0.2
AgB01	4844169	4848351	AgB01_g322_t03	+	1853	6	ovarian abundant message protein		Telo	N	Y	N	262.7	31.6	197.7	83.4	76.1	15108.9	30258.6	25947.7	491.8	283.2	368	396.4	384.5	75	20.9	17.7	24.8	2.7	1.4	1	1.2	0.9	178.5	248.5	0.4
AgB01	4857911	4861671	AgB01_g323_t01	+	456	4	hypothetical protein			N	Y	Y	0	0	0	0	0	0	0	0	0	0	0	0	0	0	0.2	0	0	0	0	0	0	0	0	0	0
AgB01	4868447	4871107	AgB01_g324_t01	-	530	3	hypothetical protein			N	Y	Y	0	0	0	0	0	0	0	0	0	0	0	0	0	0.1	0	0.1	0	0	0	0.1	0.2	0	0	0	0
AgB01	4891453	4907795	AgB01_g325_t01	-	1839	14	Plexin domain-containing protein 2	SL		N	N	N	23.9	8.5	5.6	3.6	4.5	27.2	19.9	22	8.2	2	6.5	6	6.2	10.1	15.7	18.8	14.2	19.5	19.5	17.5	10.4	0.9	15.5	44.4	11.6
AgB01	4892272	4910877	AgB01_g325_t02	-	6878	13	Plexin domain-containing protein 2	SL		N	N	N	7.9	3.2	1.8	1.1	1.5	7.8	6	6.6	2.4	0.8	4.3	3.2	3.2	4.8	9.6	9.7	6.2	9.8	10.2	9.3	5.1	1.8	7	19.5	4.8
AgB01	4892272	4922561	AgB01_g325_t03	-	3594	14	Plexin domain-containing protein 2	SL	Telo	N	Y	N	14	4.9	3.3	2.1	2.8	14.9	11.4	12.5	4.6	1.6	7.2	5.4	5.2	8.3	17.4	17.9	11.5	18.6	19.6	17.7	9.4	2.9	13.4	37	9.1
AgB01	4918215	4925669	AgB01_g325_t04	-	7455	1	hypothetical protein		Telo	N	N	Y	0.3	0.1	0	0	0	0	0	0	0	0	0.3	0.1	0.1	0.3	0.4	0.3	0.3	0.8	0.9	0.7	0.4	0.2	0.1	0.1	0.2
AgB01	4928521	4939073	AgB01_g326_t01	-	630	3	hypothetical protein			N	Y	Y	0.3	0.6	0	0	0	0.2	0.1	0	0	0	0.5	0.2	0.6	0.2	1.2	1	0.9	0.1	0	0.3	4.4	2.7	2.7	0.7	14.2
AgB01	4933948	4936048	AgB01_g327_t01	-	830	3	hypothetical protein			N	N	Y	0.9	1.2	0.2	0	0	0	0.1	0	0	0	0.1	0	0	0.2	0.3	0.4	0	0	0.1	0.1	4.6	0	4	0.9	14.3
AgB01	4933948	4936450	AgB01_g327_t02	-	702	4	hypothetical protein			N	Y	N	1.9	1.9	0.3	0	0.1	0.1	0.2	0	0	0	0.1	0.4	0.2	0.3	1	1	0.4	0.1	0.1	0.1	10.2	0	8.3	1.5	31.1
AgB01	4939695	4940652	AgB01_g328_t01	+	387	2	hypothetical protein			N	Y	Y	0.1	0	0	0	0	0	0.1	0	0	0	0.1	0	0.4	0	1	1	0.6	0	0	0	4.6	0	1.9	0.1	9.1
AgB01	4949229	4968307	AgB01_g329_t01	+	3869	18	Long-chain-fatty-acid--CoA ligase 5	SL	Telo	N	N	N	41.7	39.1	7.7	5.2	6.9	27.2	20.6	21.6	7.1	3.1	13	12.2	13.6	21.9	13.2	13.5	10.9	15.2	14.3	12.8	10.3	6.3	4.1	1.6	13.8
AgB01	4950593	4967701	AgB01_g329_t02	+	4966	15	hypothetical protein	SL	Telo	N	N	Y	26.3	23.8	5.3	4	5.2	20.8	15.6	16.3	5.4	2.6	11.1	10	11.6	18.3	11	11.2	9.6	14.2	13.9	12.2	10.3	5.6	3	1.2	3.4
AgB01	4963380	4968307	AgB01_g329_t03	+	1259	6	Long-chain-fatty-acid--CoA ligase 5		Telo	N	Y	N	85.9	99.6	12.7	0.3	3.1	0.2	0.1	0	0.2	0.3	0.1	0.5	1.3	1.2	2.1	1.6	1.6	0.6	0.6	0.3	0.6	0	1.7	0.2	16.8
AgB01	4966118	4972200	AgB01_g330_t01	-	3161	7	Long-chain-fatty-acid--CoA ligase 5			N	N	N	17.8	22	2.4	0.1	1	0.1	0	0	0.6	0.3	0.6	1.7	1.9	2.7	2.8	2.3	1	1.2	2.2	3.1	1.9	0.5	10.6	3.1	244.5
AgB01	4966118	4981696	AgB01_g330_t02	-	4348	15	Long-chain-fatty-acid--CoA ligase 5	SL		N	Y	N	7.1	9.4	1	0	0.5	0	0	0	0.6	0.3	0.4	1.2	1.4	1.9	2.6	1.9	0.7	1.4	2.5	4	2.2	1.2	12	3.5	297
AgB01	4966118	4993896	AgB01_g330_t03	-	5689	25	Long-chain-fatty-acid--CoA ligase 5	SL		N	N	N	13.7	28.2	2	0.1	0.9	0	0	0	3.9	3.9	0.4	0.9	1.2	1.5	2.1	1.6	0.8	1.3	1.8	2.8	2.1	0.9	9.6	2.6	224.5
AgB01	4966118	4996215	AgB01_g330_t04	-	6055	28	Long-chain-fatty-acid--CoA ligase 5	SL	Telo	N	N	N	13.7	29.9	2.1	0.1	1.1	0	0	0	3.7	3.7	0.4	0.8	1.1	1.4	1.9	1.5	0.7	1.3	1.7	2.7	2	0.9	9.3	2.5	211.8
AgB01	4966118	4996311	AgB01_g330_t05	-	6066	28	Long-chain-fatty-acid--CoA ligase 5	SL	Telo	N	N	N	13.7	29.9	2.1	0	1.1	0	0	0	3.7	3.7	0.4	0.8	1.1	1.4	1.9	1.5	0.7	1.3	1.7	2.7	2	0.9	9.3	2.5	211.5
AgB01	4966118	4996365	AgB01_g330_t06	-	6366	30	long-chain-fatty-acid-- ligase 5	SL	Telo	N	N	Y	9.9	24.7	1.6	0.1	0.9	0	0	0	3.6	3.5	0.4	0.9	1.2	1.5	2	1.5	0.5	1	1.7	2.7	1.9	0.8	9.2	2.5	209
AgB01	4986194	4987621	AgB01_g330_t07	-	858	2	Long-chain-fatty-acid--CoA ligase 5			N	N	N	5.9	20	1.1	0	0.3	0	0	0	6.8	3.8	0.5	0	0.4	0.1	0.4	0.1	0	0	0	0	1	0	1.1	0.1	5.4
AgB01	4986194	4996299	AgB01_g330_t08	-	2284	14	Long-chain-fatty-acid--CoA ligase 5	SL	Telo	N	N	N	11.4	48.2	2.3	0.1	1.4	0	0	0	8.5	9.1	0.4	0.3	0.6	0.4	0.5	0.3	0.1	0.2	0	0	1.3	0	2.4	0.3	12
AgB01	4986194	4996365	AgB01_g330_t09	-	2371	15	Long-chain-fatty-acid--CoA ligase 5	SL	Telo	N	N	N	11.8	49	2.3	0.1	1.6	0	0	0	8.9	9	0.4	0.3	0.6	0.4	0.5	0.3	0.1	0.1	0	0	1.3	0	2.4	0.3	12.2
AgB01	4988810	4996298	AgB01_g330_t10	-	1679	12	Long-chain-fatty-acid--CoA ligase 5	SL	Telo	N	N	N	11	48	2.5	0.1	2	0	0	0	6.6	7.7	0.4	0.3	0.4	0.5	0.5	0.3	0.1	0.2	0	0	1.4	0	2.4	0.3	13.3
AgB01	4971754	4973376	AgB01_g331_t01	.	1623	1	Long-chain-fatty-acid--CoA ligase 5			N	Y	Y	0.8	1.4	0	0	0	0	0	0	0.1	0.1	0	0	0	0	0.2	0.3	0	0.2	0.2	0.8	0.6	1.1	1.8	0.6	45.2
AgB01	4978827	4980309	AgB01_g332_t01	.	1483	1	hypothetical protein	SL		N	Y	Y	0	0	0	0	0	0	0	0	0	0	0	0	0.1	0	0	0	0	0.1	0.1	0.4	0.2	0	1.1	0.3	36.8
AgB01	5000327	5007683	AgB01_g333_t01	-	2951	2	carnitine acylcarnitine carrier protein cacl			N	Y	Y	18.7	69.8	22.3	0.7	2.6	0.1	0.1	0.1	0.1	0.1	0.3	0.1	0.2	0.3	0.7	1.1	0.6	1	1.9	1.6	6.8	0.6	2	0.2	0.2
AgB01	5000327	5011130	AgB01_g333_t02	-	2788	6	leucine--trna ligase			N	N	N	5.9	20.9	7.7	0.9	1.3	0.3	0.2	0.3	0.4	0.2	0.4	0.2	0.4	0.5	1.4	2	1.2	2	2.5	2.3	8.9	1.2	3.4	0.3	0.3
AgB01	5000327	5022964	AgB01_g333_t03	-	2514	8	leucine--trna ligase	SL	Telo	N	N	N	6.3	23	8.7	1.5	1.7	0.2	0.2	0.1	0.6	0.3	0.4	0.1	0.4	0.4	1.1	1.4	0.7	1.4	3.1	2.8	13.3	2.1	4.8	0.3	0.2
AgB01	5032119	5041465	AgB01_g334_t01	-	2766	6	hypothetical protein			N	N	N	4.8	12	11.6	0	24.4	17.9	52.8	46.9	16.5	10.7	31.4	31.4	38.3	46.4	16.8	9.4	4.5	2.9	2.6	2.1	5.2	9.4	19.2	49.5	1.7
AgB01	5032119	5042018	AgB01_g334_t02	-	2250	7	hypothetical protein			N	N	N	5.8	14.1	14.2	68.1	30	21.9	64.9	57.6	20.3	13.1	38.6	38.5	47.1	57	20.6	11.5	5.5	3.5	3.1	2.5	6.3	11.5	23.6	60.3	2
AgB01	5032119	5042262	AgB01_g334_t03	-	2237	7	hypothetical protein			N	N	N	5.9	14.1	14.3	68.5	30.2	22.1	65.3	58	20.4	13.2	38.9	38.8	47.3	57.4	20.7	11.5	5.5	3.5	3.1	2.5	6.4	11.6	23.8	60.9	2
AgB01	5032119	5045051	AgB01_g334_t04	-	2222	7	hypothetical protein			N	Y	N	5.9	14.2	14.4	69	30.4	22.2	65.7	58.3	20.6	13.3	39.5	39.2	47.7	57.9	21.1	11.6	5.6	3.6	3.2	2.5	6.4	12.4	24	61.8	2.1
AgB01	5032119	5052649	AgB01_g334_t05	-	2827	8	hypothetical protein			N	N	Y	4.6	11.2	11.4	54.4	24	18.8	52.5	46.6	16.3	10.7	31.9	31.6	38.2	46.2	16.8	9.4	4.6	3.1	2.7	2	5.1	9.2	19.3	48.6	1.8
AgB01	5043713	5051840	AgB01_g334_t06	-	557	3	hypothetical protein			N	N	N	0.1	1	0.3	0.4	0	4.3	3.1	3	0.8	1.5	3.1	2	1.3	2.6	1	1.1	0.7	1.2	1.6	0.6	0.4	0	3	1.3	0.9
AgB01	5050988	5052511	AgB01_g334_t07	-	964	3	hypothetical protein			N	N	N	0	0.1	0.1	0.2	0	4	2.4	2.1	0.8	1.2	3.9	3.7	3	3	1.6	1.4	1.5	0.9	0.8	0.1	0.3	0	2.4	1.7	0.8
AgB01	5069233	5071773	AgB01_g335_t01	+	689	3	hypothetical protein	SL		N	N	N	0	0	0.3	2.3	2.5	0	0	0	0.2	0.2	0.4	0	0	0.1	0.1	0	0	0	0.1	0.2	0.4	0	3.6	3.7	0
AgB01	5069425	5071773	AgB01_g335_t02	+	703	3	hypothetical protein	SL		N	Y	Y	0	0	0	2.3	3	0	0	0	0.2	0.2	0.3	0	0	0.1	0.1	0	0	0	0.1	0.1	0.4	0	3.6	3.5	0
AgB01	5076124	5077683	AgB01_g336_t01	+	608	2	hypothetical protein			N	Y	Y	0	0	0	0	0	0	0	0	0	0.1	0.7	0.2	0.1	0.4	0.4	0.5	0	1.8	0.1	0.4	0.1	0	3.8	8.2	0
AgB01	5081894	5086013	AgB01_g337_t01	+	1700	5	putative methylmalonyl	SL		N	Y	Y	0.6	0.1	0.9	0.3	0.3	45.5	91.5	85.3	9.8	14.2	122.7	137	212.9	179.5	84.2	83.4	106.6	25.6	15.9	15.8	13.6	0	4.8	1.5	0
AgB01	5082179	5084267	AgB01_g337_t02	+	794	3	putative methylmalonyl	SL		N	N	N	0.6	0.1	0.7	0.3	0.2	37.4	78.7	71.1	8.8	9.6	91.7	75.2	67.2	195.4	98.1	82	48.5	30.8	17.5	16.1	15.1	0	2.6	0.8	0
AgB01	5086651	5096672	AgB01_g338_t01	-	3183	9	Protein midA, partial	SL		N	Y	N	4.9	0.8	1.3	0.7	1.3	4.4	4.9	4.6	1.8	1.1	2.2	1.3	1	4.5	6.5	5.9	4	9.6	10.6	8.5	12.6	2.7	1.9	0.9	1.1
AgB01	5086651	5097800	AgB01_g338_t02	-	3533	9	Protein midA, partial	SL		N	N	Y	4.7	0.8	1.2	0.6	1.2	4	4.4	4.2	1.7	0.9	2	1.2	0.9	4	5.9	5.4	3.9	8.6	9.8	7.9	11.3	2.4	1.7	0.8	1.1
AgB01	5086651	5097800	AgB01_g338_t03	-	3521	9	Protein midA, partial	SL		N	N	N	4.7	0.8	1.2	0.6	1.2	4	4.4	4.2	1.7	1	1.9	1.2	0.9	4	5.9	5.4	4	8.7	9.8	8	11.5	2.5	1.8	0.9	1
AgB01	5086651	5097800	AgB01_g338_t04	-	3528	9	Protein midA, partial	SL		N	N	N	4.7	0.8	1.2	0.6	1.2	4	4.4	4.2	1.7	1	2	1.2	0.9	4.1	6	5.5	4	8.9	9.9	8.1	11.5	2.4	1.8	0.9	1.1
AgB01	5095428	5097800	AgB01_g338_t05	-	1466	2	hypothetical protein	SL		N	N	N	1.5	0.2	0.4	0.1	0.2	0.7	0.9	0.4	0.5	0.4	0.7	0.3	0.4	0.8	1.8	1.6	2	2.3	2.7	2.4	3.2	0	0.5	0.3	0.3
AgB01	5100587	5107371	AgB01_g339_t01	-	1622	9	Calreticulin		Telo	N	N	Y	93.1	26	57	58.4	29.2	45.5	54.1	49.3	67.9	475	126	87.7	82.5	70.5	62.5	109.3	190.1	411.5	286.4	467.2	363.4	78.9	273.2	263.3	341.9
AgB01	5100587	5108205	AgB01_g339_t02	-	1590	9	Calreticulin		Telo	N	Y	N	89.3	24.8	53.9	54.5	27.4	42.9	51.3	47.2	63.5	449.6	121.4	86	78.3	67.4	59.4	105.7	182.8	396.1	276.2	451.7	346.5	73.9	253.9	243.2	316.5
AgB01	5102721	5106986	AgB01_g339_t03	-	599	4	Calreticulin, partial		Telo	N	N	N	87.3	23.2	53.9	59.1	30.7	44.9	50.3	42.6	61.9	378.3	72.9	54	52.9	79.6	70.6	92.2	159.5	387.6	260.2	370.6	324	46.2	167.3	176	238.9
AgB01	5103092	5107406	AgB01_g339_t04	-	1072	7	Calreticulin		Telo	N	N	N	136.2	35.4	84.1	87.9	45.4	66.1	82.7	72.6	98.2	406.7	79	60.4	72.4	80.7	64.7	111.1	198.4	420.9	279.7	443.6	359.3	58.1	213.4	221.3	294.5
AgB01	5103092	5108205	AgB01_g339_t05	-	1005	7	Calreticulin		Telo	N	N	N	136.3	35.2	82.9	85.7	44.6	64.9	82.1	72.5	95.6	378.4	73	58.9	68	79	62.1	109.3	194	411.4	273	433.7	344.6	51.6	188.3	195.9	262.8
AgB01	5112769	5121063	AgB01_g340_t01	+	2482	7	Innexin-16	SL		N	Y	Y	1	0.7	0	0	0.3	0	0	0	0.6	0.6	0.6	0.9	1.2	1.1	0.8	0.3	0.2	1.6	4.2	2	15.3	0	13.8	1.9	49.5
AgB01	5121564	5124212	AgB01_g341_t01	+	839	3	Innexin-16			N	Y	Y	0.4	1.3	0.1	0	0.1	0	0.1	0	0.8	0.2	3.9	3.7	3.7	4.9	2	1.3	0.7	0.8	2.4	1.1	10.6	2.1	14	2.2	44.7
AgB01	5124289	5128044	AgB01_g342_t01	-	1552	2	Serpin B10			N	Y	Y	0.1	0.3	0	0	0	0	0	0	0	0.2	0.4	0.4	0.3	1	0.3	0.1	0.1	0	0.2	0.2	0.1	0	1.8	0.2	0
AgB01	5131246	5132547	AgB01_g343_t01	-	439	2	Serpin-like protein			N	Y	Y	0	0.1	0	0	0	0	0	0	0	0	0	0	0	0	0.5	0.3	0.2	0	0	0.1	0.2	3.9	3.3	0.1	0
AgB01	5148757	5152257	AgB01_g344_t01	-	1800	3	hypothetical protein		Telo	N	Y	N	27.2	127.2	158.1	1.4	14.9	0	0.1	0	0	0.5	0.2	0.6	1.1	0.4	0.5	0.3	0.8	0.7	0.2	0.1	0.2	1	1	0.1	0
AgB01	5148757	5152435	AgB01_g344_t02	-	1959	3	Protein SUP-1		Telo	N	N	Y	30.1	131.2	159.4	1.4	16.1	0	0.1	0	0	0.5	0.2	0.6	1.1	0.3	0.5	0.3	0.8	0.7	0.2	0.1	0.3	0.9	1	0.1	0
AgB01	5153226	5163750	AgB01_g345_t01	-	5704	4	Protein SUP-1	SL		N	Y	N	7	2.1	7.6	5.4	3	9.2	7.7	8.1	49.3	76.2	52.7	51.7	60.9	43	60.7	71.4	85.1	57.7	82.8	109.3	78.8	48.8	31.8	6.9	6.3
AgB01	5153226	5163750	AgB01_g345_t02	-	7860	3	Protein SUP-1	SL		N	N	Y	5.2	1.8	5.8	3.9	2.2	6.7	5.6	5.9	36.2	55.7	38.4	37.6	44.2	31.3	44.2	52	61.9	42.1	60.6	80.3	57.9	35.4	23.2	5	4.5
AgB01	5183045	5191837	AgB01_g346_t01	+	3247	4	Chromatin-remodeling complex ATPase chain isw-1			N	N	N	34.5	43.5	4.4	0.2	0.8	0.7	0.9	0.7	1	1.9	11.8	5.8	4.6	7.2	26.7	15.5	8.5	17.2	20.3	13.6	9.1	3.7	2.7	1.1	1.1
AgB01	5183899	5191837	AgB01_g346_t02	+	4037	3	Chromatin-remodeling complex ATPase chain isw-1			N	N	Y	27.9	35.1	3.6	0.1	0.6	0.6	0.7	0.6	0.8	1.6	9.6	4.8	3.8	5.9	21.6	12.5	6.8	13.8	16.4	11	7.3	3	2.2	0.9	0.9
AgB01	5183992	5191837	AgB01_g346_t03	+	3519	4	Chromatin-remodeling complex ATPase chain isw-1			N	Y	N	32	40.4	4.1	0.2	0.8	0.7	0.8	0.6	0.9	1.8	10.9	5.4	4.3	6.8	24.7	14.3	7.8	15.8	18.8	12.6	8.4	3.4	2.5	1	1
AgB01	5184555	5187623	AgB01_g346_t04	+	3069	1	hypothetical protein			N	N	N	31.9	44.7	4.3	0.1	0.7	0.3	0.3	0.2	0.3	0.7	1.7	2.3	2.6	2.3	2.8	2.3	2.6	0.5	0.8	2	1.4	0	0.8	0.4	0
AgB01	5189398	5191837	AgB01_g346_t05	+	2440	1	Chromatin-remodeling complex ATPase chain isw-1			N	N	N	4.8	3.1	0.6	0.2	0.1	0.7	0.8	0.7	0.9	1.8	13.8	5.2	3	7.5	32.9	18	8.3	22.5	26.3	16	10.7	5	2.7	1	1.4
AgB01	5189357	5199434	AgB01_g347_t01	-	2439	7	Chromatin-remodeling complex ATPase chain isw-1			N	N	N	12.3	6.6	2.2	0	1.4	4.1	4.8	4	5	4.7	26.2	16.4	12.4	24.2	71.1	48.2	35.1	58.7	69.1	39	26.8	12.8	6.4	2.4	3.2
AgB01	5189357	5199535	AgB01_g347_t02	-	2540	6	Chromatin-remodeling complex ATPase chain isw-1			N	N	N	11.9	6.3	2.1	0.5	1.4	4	4.6	3.8	4.8	4.6	25.2	15.8	11.9	23.3	68.4	46.3	33.8	56.6	66.9	37.6	26	12.9	6.2	2.4	3.1
AgB01	5189357	5199535	AgB01_g347_t03	-	2540	6	Chromatin-remodeling complex ATPase chain isw-1			N	N	N	7	3.3	1.6	0.4	1.3	3.3	3.8	3.2	4	2.9	11.9	10.8	9.2	16.2	36.8	29.1	25.8	35.2	41.8	22.5	16	8.2	3.7	1.4	1.8
AgB01	5189357	5199535	AgB01_g347_t04	-	3693	5	Chromatin-remodeling complex ATPase chain isw-1			N	N	N	8.2	4.3	1.5	0.3	1	2.6	3	2.5	3.3	3	17	10.7	7.9	15.6	45.9	31	22.3	38.8	45.4	26	18.4	8.9	4.2	1.6	2.1
AgB01	5189357	5218693	AgB01_g347_t05	-	5647	22	Chromatin-remodeling complex ATPase chain isw-1	SL		N	N	Y	8.8	3.5	2.9	0.7	1.9	6	6.4	6.4	7.9	4.6	15.3	13.9	18.3	27.2	52.9	49.2	46.7	57.6	65.3	36	26.1	8.9	4.5	1.9	3
AgB01	5189357	5218808	AgB01_g347_t06	-	4970	23	Chromatin-remodeling complex ATPase chain isw-1	SL		N	N	N	10.3	4.1	3.3	0.8	2.1	6.9	7.4	7.4	9	5.3	17.4	15.8	20.8	31	60.6	56.3	53.3	65.3	74	40.7	29.3	10.1	5.1	2.2	3.3
AgB01	5189357	5218921	AgB01_g347_t07	-	5001	23	Chromatin-remodeling complex ATPase chain isw-1	SL		N	Y	N	10	4	3.2	0.7	2.1	6.9	7.4	7.4	8.9	5.2	17.4	15.7	20.6	30.8	60.2	55.9	53	65	73.6	40.6	29.2	10	5.1	2.2	3.3
AgB01	5219857	5223171	AgB01_g348_t01	+	2446	3	hypothetical protein			N	Y	N	0.7	0.1	0.5	1.2	0.4	0.5	0.6	0.6	0	1.3	9.9	8.8	7.7	9.4	8	6.3	7.4	10.1	5	1.9	1.2	2.1	3.5	1.3	0.8
AgB01	5219857	5223171	AgB01_g348_t02	+	2933	2	hypothetical protein			N	N	N	1	0.1	0.4	1	0.3	0.4	0.5	0.5	0	1.1	8.6	7.6	6.7	8.3	7	5.5	6.5	8.8	4.4	1.8	1.1	2.4	3	1.1	0.7
AgB01	5220071	5223171	AgB01_g348_t03	+	3101	1	hypothetical protein			N	N	Y	1	0.1	0.4	0.8	0.3	0.4	0.5	0.4	0	1	8	6.9	6	7.8	6.5	5.2	5.9	8.3	4.2	1.7	1.1	0.6	2.8	1	0.7
AgB01	5229176	5250119	AgB01_g349_t01	+	5562	25	copper-transporting atpase 1	SL		N	N	N	4.4	1.1	2.6	0.7	2.4	8.3	3.5	3.6	2.9	2.5	4.1	4.4	5.1	6.2	9.8	13.2	14.8	46.7	58.1	56.1	46.2	54.4	4.1	0.8	13.7
AgB01	5229176	5250119	AgB01_g349_t02	+	5457	24	copper-transporting atpase 1	SL		N	N	N	4.5	1.1	2.6	0.7	2.5	8.4	3.6	3.7	2.9	2.6	4.1	4.5	5.2	6.4	10	13.4	15.1	47.7	59.2	56.9	47.1	55.1	4.1	0.8	13.5
AgB01	5229176	5250119	AgB01_g349_t03	+	5457	24	copper-transporting atpase 1	SL		N	N	N	4.5	1.1	2.6	0	2.5	8.4	3.6	3.7	2.9	2.6	4.1	4.5	5.2	6.4	10	13.4	15.1	47.7	59.2	56.9	47.1	55.1	4.1	0.8	13.5
AgB01	5229176	5250119	AgB01_g349_t04	+	6021	23	copper-transporting atpase 1	SL		N	Y	N	4.1	1	2.5	0.7	2.3	7.6	3.2	3.3	2.9	2.6	3.9	4.2	5.1	6	10.5	13.5	17.4	47.8	59.1	57.9	47.7	53.7	3.9	0.8	13.6
AgB01	5229178	5250119	AgB01_g349_t05	+	6019	23	copper-transporting atpase 1	SL		N	N	N	4.1	1	2.5	0.7	2.3	7.6	3.2	3.3	2.9	2.6	3.9	4.2	5.1	6	10.5	13.5	17.4	47.8	59.2	57.9	47.8	53.7	3.9	0.8	13.6
AgB01	5229178	5250119	AgB01_g349_t06	+	5440	24	copper-transporting atpase 1	SL		N	N	N	4.5	1.1	2.6	0.7	2.5	8.5	3.6	3.7	2.9	2.6	4.2	4.5	5.2	6.4	10.1	13.5	15.1	48	59.6	57.4	47.4	55.6	4.1	0.8	13.5
AgB01	5229178	5250119	AgB01_g349_t07	+	5440	24	copper-transporting atpase 1	SL		N	N	N	4.5	1.1	2.6	0.7	2.5	8.5	3.6	3.7	2.9	2.6	4.2	4.5	5.2	6.4	10.1	13.5	15.1	48	59.6	57.4	47.4	55.6	4.1	0.8	13.5
AgB01	5229178	5250119	AgB01_g349_t08	+	6139	24	copper-transporting atpase 1	SL		N	N	Y	4	1	2.5	0.7	2.2	7.4	3.2	3.2	2.8	2.5	3.9	4.1	5	5.9	10.2	13.3	17.1	46.7	57.8	56.7	46.7	52.7	3.9	0.8	13.8
AgB01	5229178	5250119	AgB01_g349_t09	+	5560	25	copper-transporting atpase 1	SL		N	N	N	4.4	1.1	2.6	0.7	2.4	8.3	3.5	3.6	2.9	2.5	4.1	4.4	5.1	6.2	9.8	13.2	14.8	46.7	58.1	56.1	46.3	54.4	4.1	0.8	13.7
AgB01	5252355	5262231	AgB01_g350_t01	+	5075	7	26S proteasome non-ATPase regulatory subunit 14		Telo	N	Y	Y	6.9	18.2	1.8	0.1	0.5	0.1	0	0.1	0.1	0.5	3.7	1.5	0.2	1.1	2.3	1.2	0.3	0.6	1.1	4.9	1.7	0.7	0.5	0.1	0.1
AgB01	5256218	5264891	AgB01_g351_t01	-	5934	5	Rhotekin			N	N	N	5.8	14.5	1.5	0.1	0.5	1.9	2.3	2.5	0.9	1.4	13.5	7.4	3	4.2	9.2	4	1.4	2.3	3.9	17.4	5.6	3.5	1.2	0.1	0.1
AgB01	5256218	5296182	AgB01_g351_t02	-	6639	14	Rhotekin			N	Y	N	3.7	10.1	1.1	0.1	0.4	8.4	14.5	14.2	4.4	1.6	15.1	9.1	5.9	7	11.4	6.9	2.1	1.8	3.7	21.5	6.8	5.5	1.3	0.2	0.3
AgB01	5256218	5296478	AgB01_g351_t03	-	6933	14	Rhotekin			N	N	Y	3.6	9.6	1.1	0.1	0.4	8.1	14	13.6	4.2	1.5	14.5	8.8	5.7	6.8	11	6.6	2	1.8	3.6	20.8	6.6	5.2	1.3	0.2	0.3
AgB01	5314422	5324407	AgB01_g352_t01	+	4276	5	swib mdm2 domain-containing protein			N	Y	Y	9.6	0.9	1.5	0.5	1.9	4.9	6.2	5.1	2.4	2.4	18	17.1	20.8	21.5	41	38.6	39.5	35	23.9	12.7	7.3	8.5	2.6	0.6	0.7
AgB01	5314441	5324407	AgB01_g352_t02	+	4258	5	swib mdm2 domain-containing protein			N	N	N	9.6	0.9	1.5	0.5	1.9	4.7	6	5	2.3	2.3	17.7	16.3	19.2	20.5	39.8	37.2	37.3	34.2	23.1	12.3	7.1	8.1	2.6	0.6	0.7
AgB01	5329990	5371572	AgB01_g353_t01	+	1447	10	hypothetical protein	SL		N	N	N	14.4	3	15.6	19.7	35.4	35	40.4	38.1	15.9	6.3	18.6	25	37	51.3	46.2	64	64.9	22.8	11.6	25.5	30.7	9.6	17.7	37	0.8
AgB01	5329990	5378749	AgB01_g353_t02	+	4362	13	hypothetical protein	SL		N	Y	N	7.6	9.2	7.9	8.4	16.2	14.4	16.7	15.8	7.1	5.2	20.2	19.8	20.4	32.5	38.5	59.4	43.2	21	10	26.7	28	9.5	21.5	40.4	1.1
AgB01	5339778	5378749	AgB01_g353_t03	+	5611	11	hypothetical protein	SL		N	N	Y	5.9	7.1	6.1	6.4	12.6	11.2	12.9	12.2	5.4	3.8	15.2	14.9	15.1	24.3	29	45.1	33	16	7.7	20.5	21.4	7.1	16.4	30.8	0.8
AgB01	5373690	5378749	AgB01_g353_t04	+	2962	5	hypothetical protein			N	N	N	5.7	13.9	4.8	2.7	6.6	4	4.7	4.6	2.5	4.5	20.4	16.7	11.7	22.2	33.6	54.9	30.8	19.6	8.9	26.5	25.8	9.3	22.9	40.9	1.2
AgB01	5374093	5378749	AgB01_g353_t05	+	3136	4	hypothetical protein			N	N	N	4.8	12.4	4.2	2.6	6.3	3.8	4.5	4.3	2.4	4.3	19.3	15.8	11.1	21	32	52	29.2	18.7	8.5	25.3	24.6	8.8	21.7	38.6	1.1
AgB01	5383586	5405022	AgB01_g354_t01	+	4337	15	Phosphoglucomutase-2	SL	Telo	N	N	Y	24	47.5	7.8	10.5	10.7	48.1	34.5	37.6	8.2	4.5	17.4	11.2	13	22.7	19.2	18.8	14	16.3	11.6	9.4	4.9	1.6	4.8	3.3	0.4
AgB01	5383595	5405022	AgB01_g354_t02	+	3451	16	Phosphoglucomutase-2	SL	Telo	N	N	N	29.9	57.3	9.7	13.1	13.3	59.9	43.2	47	10.1	5.1	19.1	13.1	16.1	26.3	21.5	21.7	17	18	12.8	10	5.4	2	4.8	3.6	0.5
AgB01	5383595	5405022	AgB01_g354_t03	+	3462	16	Phosphoglucomutase-2	SL	Telo	N	N	N	29.8	57.1	9.7	13	13.3	59.8	43.2	46.9	10.1	5.1	18.9	13.1	16	26.2	21.3	21.5	17	17.9	12.8	10	5.4	2	4.8	3.6	0.5
AgB01	5387543	5405022	AgB01_g354_t04	+	4318	15	Phosphoglucomutase-2	SL	Telo	N	Y	N	24	47.6	7.9	10.5	10.7	48.3	34.6	37.7	8.2	4.5	17.4	11.1	13	22.8	18.7	18.3	13.8	16	11.5	9.3	4.9	1.6	4.7	3.2	0.4
AgB01	5390223	5405022	AgB01_g354_t05	+	4318	15	Phosphoglucomutase-2	SL	Telo	N	N	N	24	47.6	7.9	10.5	10.7	48.3	34.6	37.7	8.2	4.5	17.4	11.1	13	22.8	18.7	18.3	13.8	16	11.5	9.3	4.9	1.6	4.7	3.2	0.4
AgB01	5406314	5417415	AgB01_g355_t01	+	6879	4	NTF2-related export protein	SL	Telo	N	N	N	26.3	2.8	15.1	20.9	16.1	26.6	20.2	19.7	15.3	11.7	22.7	22.5	15.5	18.5	19.8	25.3	19.6	27	23.1	16.9	12	4.3	11.2	10.1	13.5
AgB01	5406314	5417415	AgB01_g355_t02	+	7250	3	NTF2-related export protein	SL	Telo	N	N	N	20	2.3	11.8	16.2	12.4	20.6	15.9	15.7	12.6	9.5	22	20.4	14.5	19.1	17.3	19.6	16.5	21.7	18.7	13	10.3	3.3	9	7.9	10.4
AgB01	5406795	5417415	AgB01_g355_t03	+	6048	4	NTF2-related export protein	SL	Telo	N	N	N	21.3	2.4	12.5	17.1	13.1	21.5	17	16.8	13.7	10	23.7	21.2	14.9	20	18.5	20.2	18.1	23.4	20.5	14.3	11.5	4	9.8	8.8	11.5
AgB01	5409073	5417415	AgB01_g355_t04	+	8343	1	Adenosylhomocysteinase, partial	SL	Telo	N	N	Y	13.7	1.5	7.4	9.5	8.3	12.5	10.4	10.2	8	5	13.4	11.8	7.9	11.8	10.2	10.2	9.6	12.7	11.2	7.5	6.5	2.3	5.8	5.1	6.6
AgB01	5409462	5417415	AgB01_g355_t05	+	5736	3	NTF2-related export protein	SL	Telo	N	Y	N	19.1	2.1	10.4	13.6	11.6	17.9	14.9	14.5	11.4	7.4	19.8	17.5	11.5	18.1	15.2	15	13.9	19	16.5	11.1	9.6	3.3	8.3	7.4	9.4
AgB01	5409016	5414240	AgB01_g356_t01	-	4844	2	Adenosylhomocysteinase, partial	SL	Telo	N	N	N	13.2	1.4	6	6.3	8.1	9.7	10.7	9.9	7.7	7.1	27.7	19	13.3	21.9	15.8	11.3	9.4	15.3	13	8.9	9.3	4.3	6.3	5	5.3
AgB01	5409016	5415751	AgB01_g356_t02	-	5838	3	adenosylhomocysteinase	SL	Telo	N	N	N	18.7	1.6	8.9	10.7	10.9	14.8	13.8	12.9	9.6	8.1	22.9	17.7	12	16.6	15.5	15.5	11.1	18.1	15.2	11.5	9.4	4.7	7.5	6.4	7.7
AgB01	5409016	5416285	AgB01_g356_t03	-	5555	5	adenosylhomocysteinase	SL	Telo	N	N	N	23.7	2.2	11.9	14.9	14.6	20.7	17.8	16.7	12.5	10.3	26	20.7	15	18.9	19.2	21	14.4	23.3	19.1	14.3	11.4	5	9.5	8.1	10
AgB01	5409016	5418289	AgB01_g356_t04	-	6066	7	adenosylhomocysteinase	SL	Telo	N	N	Y	24.5	2.4	13.5	18	15	23.3	18.6	17.5	14.7	13.4	28.7	24.2	18.3	19.6	22.4	26.5	19.5	29	24.2	19	13.2	6	11.4	10.1	12.8
AgB01	5409016	5418304	AgB01_g356_t05	-	5700	8	adenosylhomocysteinase	SL	Telo	N	Y	N	27.4	2.7	14.9	20	17	25.7	20.7	19.5	16.1	14.6	30.9	26	19.7	21	24.5	29.1	21.3	31.6	26.3	20.6	14.4	6.4	12.7	11.2	14.1
AgB01	5427106	5436321	AgB01_g357_t01	+	3389	7	Translation initiation factor eIF-2B subunit alpha	SL		N	N	Y	1.8	0.6	2.9	0.9	0.6	2.2	1.7	1.7	2	3.8	20	15.2	10.2	25	23.8	29.4	19.1	25.6	16.6	9.2	5.9	2.6	6.1	2.5	2.8
AgB01	5427511	5436321	AgB01_g357_t02	+	1723	8	Translation initiation factor eIF-2B subunit alpha	SL		N	Y	N	3	1.1	5.6	1.6	1.1	4.3	3.2	3.3	3.8	6.9	36.4	27.6	18.6	47.2	44.4	55.3	35.6	48.1	30.8	16.9	10.9	4	11.9	4.7	5.3
AgB01	5427816	5436321	AgB01_g357_t03	+	2202	8	Translation initiation factor eIF-2B subunit alpha	SL		N	N	N	2.8	1	4.5	1.3	0.9	3.5	2.7	2.7	3.2	5.9	32.8	24.2	16	40.5	39.6	48.5	31.5	44	27.1	15.5	10.2	3.9	11.3	4.5	4.6
AgB01	5432066	5436321	AgB01_g357_t04	+	1680	3	Translation initiation factor eIF-2B subunit alpha			N	N	N	1.6	0.7	1.6	0.7	0.2	1.6	1.7	1.2	1.4	3.9	23.9	15.6	8	24.5	27.4	31.1	22.2	32.2	19.5	12	8.3	5.1	8.6	3.2	2.9
AgB01	5432879	5436321	AgB01_g357_t05	+	1332	2	Translation initiation factor eIF-2B subunit alpha			N	N	N	1.9	0.9	1.5	0.8	0.2	1.7	1.8	1.2	1.5	4.3	27.6	17.8	9.2	26.6	29.5	34.2	24.2	34.6	19.7	13.4	8.3	5.2	9.6	3.5	3.1
AgB01	5434802	5436240	AgB01_g358_t01	-	1439	1	Translation initiation factor eIF-2B subunit alpha			N	Y	Y	1	0.6	0.3	0.1	0.1	0.6	0.8	0.5	0.5	0.9	6.8	3.7	1.8	5.2	7.2	7.9	5.4	9.8	4.6	3.4	2.6	0	3.5	1.3	1
AgB01	5436373	5436782	AgB01_g359_t01	.	410	1	hypothetical protein			N	Y	Y	0.7	1.2	0.6	0	0	0.2	0.4	0.4	0	0	0.3	0	0	0.2	0	0	0.3	0	0.1	0.1	0	0	0	0	0
AgB01	5437900	5446102	AgB01_g360_t01	-	2873	9	putative protein phosphatase methylesterase 1	SL	Telo	N	N	Y	25.3	17.9	4.6	7.1	5.6	9.5	5.2	5.4	5.3	4.7	19.7	14.7	8.8	20.4	27.5	28.5	15.1	31	29.4	18	11.9	9.6	6.6	3.3	7.1
AgB01	5437900	5446116	AgB01_g360_t02	-	2809	8	putative protein phosphatase methylesterase 1	SL	Telo	N	N	N	34	24	5.4	8.3	6.9	11.3	6.1	6.3	7.1	7	29.5	19.9	12.7	27.5	37.9	38.5	21.9	45	44.1	27.2	17.8	12.3	10.1	5.2	10.4
AgB01	5437900	5446116	AgB01_g360_t03	-	2116	9	putative protein phosphatase methylesterase 1	SL	Telo	N	Y	N	34.2	23.7	6.3	9.7	7.6	12.8	6.9	7.4	7.1	6	23.7	18.6	10.9	26.3	31.6	33.7	17.4	37	35.6	21.6	14.4	11.4	7.6	4	8.2
AgB01	5437900	5446138	AgB01_g360_t04	-	2066	9	putative protein phosphatase methylesterase 1	SL	Telo	N	N	N	45.3	30.9	7.2	11.3	9.3	15.2	8.1	8.5	9.5	8.5	33.8	24.4	15	32.9	39.5	42.1	24	49.4	49.1	30.2	19.6	10.9	10.6	5.7	11
AgB01	5438147	5441423	AgB01_g361_t01	+	2729	2	Protein phosphatase methylesterase 1		Telo	N	Y	Y	8.5	5.9	0.7	1.1	1.2	1.7	0.9	0.7	1.7	2.3	9.8	5	3.9	6.8	10	9.6	6.6	14	14.7	9.4	6.1	1.9	3.4	1.8	3.3
AgB01	5447897	5454890	AgB01_g362_t01	-	2924	2	hypothetical protein			N	N	N	2.5	1.3	1.5	0	0.6	0.8	0.4	0.4	0.7	3.4	6.1	10.7	6.9	8.5	12.6	6.1	4.6	5.4	6.2	7.3	6.8	3.5	20	9.9	10.3
AgB01	5447897	5455055	AgB01_g362_t02	-	3169	3	hypothetical protein			N	N	N	3	1.6	2.3	0.3	0.6	1.2	0.5	0.5	0.9	3.7	5.7	10	6.8	8.1	12.4	6.2	5.5	6.5	7.3	8.4	7.5	4.4	18.9	9.2	9.8
AgB01	5447897	5469873	AgB01_g362_t03	-	16213	7	Histone-lysine N-methyltransferase PRDM9	SL		N	N	N	4.1	1.2	3.5	1.2	1.4	2.1	1.3	1.1	1.1	2	4.5	4.7	3.5	4.5	5.4	3.4	4.5	5.6	6.9	7.7	6.3	4.6	7.5	4.3	4.3
AgB01	5447897	5469873	AgB01_g362_t04	-	16360	8	Histone-lysine N-methyltransferase PRDM9	SL		N	Y	Y	1.2	0.3	1.6	0.7	0.6	1.3	0.9	0.8	0.7	1.1	2.6	2.2	1.9	2.7	2.5	1.7	2.3	3	3.6	3.8	3.1	2.4	1.8	1.2	1.4
AgB01	5447897	5469873	AgB01_g362_t05	-	16355	8	Histone-lysine N-methyltransferase PRDM9	SL		N	N	N	3.9	1.2	3.5	1.2	1.3	2.3	1.4	1.3	1.3	2.1	4.6	4.9	3.6	4.8	5.5	3.4	4.4	5.5	6.9	7.5	6.1	4.4	6.9	4.1	4.1
AgB01	5447897	5469873	AgB01_g362_t06	-	16218	7	Histone-lysine N-methyltransferase PRDM9	SL		N	N	N	2.1	0.7	3	1	0.9	1.4	1	0.8	0.8	1.6	3.6	2.9	2.3	3.2	3.8	2.6	3.7	5.1	6.3	7	5.5	4.2	3.3	2.1	2.9
AgB01	5449156	5465338	AgB01_g363_t01	+	16183	1	Histone-lysine N-methyltransferase PRDM9			N	N	Y	0.9	0.2	1.4	0.5	0.4	0.6	0.3	0.3	0.3	0.7	1.6	1.7	1	1.3	1.7	1.1	1.6	2.3	3	3.5	2.5	1.7	1.6	1	1.2
AgB01	5457952	5465338	AgB01_g363_t02	+	4490	2	Histone-lysine N-methyltransferase PRDM9			N	Y	N	0.5	0.1	0.5	0.3	0.2	0.9	0.6	0.8	0.7	1	3.3	1.8	0.9	2.1	1.9	1.2	1.2	1.7	2.3	2.5	1.8	1.5	1.2	0.6	0.6
AgB01	5458187	5465338	AgB01_g363_t03	+	2736	2	Histone-lysine N-methyltransferase PRDM9			N	N	N	0.6	0.1	0.8	0.5	0.2	1.5	0.9	1.2	0.9	0.3	1.1	0.6	0.5	0.9	0.7	0.5	0.9	1.1	1.7	2.2	1.3	0.6	0.7	0.4	0.3
AgB01	5476707	5489540	AgB01_g364_t01	+	1698	10	organic cation transporter protein			N	N	Y	0.1	0	0	1.1	0.4	0	0	0	0	0	0	0	0	0	0.1	0.1	0	0.3	0.3	0.1	3.3	0	1.6	1.9	0.3
AgB01	5476707	5489540	AgB01_g364_t02	+	1662	10	organic cation transporter protein			N	N	N	0.1	0	0	1	0.4	0	0	0	0	0	0	0	0	0	0.1	0	0	0.3	0.3	0.1	3.1	0	1.7	1.9	0.3
AgB01	5484559	5485020	AgB01_g364_t03	+	462	1	Solute carrier family 22 member 16			N	N	N	0	0	0	0	0.1	0	0	0	0	0	0	0	0	0	0	0	0	0.2	0.2	0	2.7	0	0.4	0.9	0.1
AgB01	5484578	5489540	AgB01_g364_t04	+	647	3	organic cation transporter protein			N	Y	N	0.2	0	0	0.6	0.7	0	0	0	0	0	0	0	0	0	0.1	0.1	0	0.3	0.5	0	4.2	0	2.1	2.2	0.3
AgB01	5498032	5510905	AgB01_g365_t01	+	1538	11	gamma-aminobutyric acid receptor subunit beta			N	N	N	0	0.1	0	0	0	0	0	0	0	0	0.1	0.4	0.4	0.1	0.7	0.8	0.4	0	0	0.1	1.8	1.1	0.1	0.1	0.2
AgB01	5498032	5510905	AgB01_g365_t02	+	1675	12	gamma-aminobutyric acid receptor subunit beta			N	Y	Y	0	0.2	0	0	0	0	0	0	0	0	0.1	0.3	0.3	0.1	0.8	0.9	0.3	0	0	0.2	1.9	1	0.2	0.1	0.2
AgB01	5548301	5573398	AgB01_g366_t01	+	1129	6	gamma-aminobutyric acid receptor subunit beta		Telo	N	Y	N	0	0.1	3.5	1.2	0.5	0	0	0	0.6	0.4	0	0	0	0	0.1	0.1	0	0.1	0	1.3	12.6	13.8	1.5	4	0
AgB01	5548301	5603017	AgB01_g366_t02	+	7331	12	gamma-aminobutyric acid receptor subunit beta		Telo	N	N	N	0.1	0.1	1.1	1.4	0.4	0.1	0	0	0.6	0.4	0	0.1	0.1	0.2	0.4	0.3	0.2	0.8	0.3	0.9	8.5	12.5	0.6	1.9	0
AgB01	5578706	5603017	AgB01_g366_t03	+	7339	14	gamma-aminobutyric acid receptor subunit beta			N	N	N	0	0.1	0.7	1.6	0.4	0.1	0	0	0.6	0.4	0.1	0.1	0.1	0.2	0.5	0.4	0.3	0.9	0.3	0.8	7.1	10.8	0.6	1.5	0
AgB01	5579438	5603017	AgB01_g366_t04	+	7943	11	gamma-aminobutyric acid receptor subunit beta			N	N	Y	0	0.1	0.6	1.7	0.5	0.1	0	0	0.6	0.4	0.1	0.1	0.1	0.2	0.7	0.5	0.3	1.2	0.3	0.9	7.4	10	0.6	1.6	0
AgB01	5579438	5603017	AgB01_g366_t05	+	7887	10	gamma-aminobutyric acid receptor subunit beta			N	N	N	0	0.1	0.6	0	0.5	0.1	0	0	0.6	0.4	0.1	0.1	0.1	0.2	0.7	0.5	0.2	1.1	0.3	0.9	7.1	9.6	0.6	1.5	0
AgB01	5580093	5603017	AgB01_g366_t06	+	7202	12	gamma-aminobutyric acid receptor subunit beta			N	N	N	0	0.1	0.7	1.8	0.5	0.1	0	0	0.7	0.4	0.1	0.1	0.1	0.2	0.6	0.5	0.2	1	0.3	0.9	7.2	11	0.6	1.6	0
AgB01	5580107	5603017	AgB01_g366_t07	+	6895	10	gamma-aminobutyric acid receptor subunit beta			N	N	N	0	0.1	0.7	1.5	0.4	0.1	0	0	0.7	0.4	0.1	0.1	0.1	0.2	0.4	0.4	0.2	0.9	0.3	0.8	7.3	11.3	0.6	1.5	0
AgB01	5580107	5603017	AgB01_g366_t08	+	7617	10	gamma-aminobutyric acid receptor subunit beta			N	N	N	0	0.1	0.6	1.6	0.5	0.1	0	0	0.7	0.4	0.1	0.1	0.1	0.2	0.6	0.5	0.2	1.1	0.3	0.9	7.3	10	0.6	1.5	0
AgB01	5583206	5603017	AgB01_g366_t09	+	7748	10	gamma-aminobutyric acid receptor subunit beta			N	N	N	0	0.1	0.6	1.8	0.6	0.1	0	0	0.7	0.4	0.1	0.1	0.1	0.2	0.7	0.5	0.2	1.2	0.3	0.9	7.4	10.3	0.6	1.6	0
AgB01	5607330	5608686	AgB01_g367_t01	+	543	3	glutamate-gated chloride channel			N	Y	Y	1	0.6	2.8	0.7	0.9	0.4	0.2	0.1	0.4	0.6	0.1	0.1	0.4	0.1	0.4	0.2	0.4	0.3	0.1	0.5	7	6.4	0.9	1.9	0
AgB01	5609095	5629372	AgB01_g368_t01	-	4723	21	Glutamate-gated chloride channel	SL	Telo	N	N	N	4.8	3.2	1.7	0.4	0.8	2.9	1.8	2	0.6	0.5	2	1.9	4.2	7	12.7	14.6	11.1	16.5	13.6	11.8	9	6.6	2.1	0.7	0.8
AgB01	5609095	5629372	AgB01_g368_t02	-	4693	22	Glutamate-gated chloride channel	SL	Telo	N	N	N	5.1	3.6	1.8	0.5	1.1	3.4	2.1	2.3	0.6	0.6	2.2	2.1	4.5	7.6	13.8	16.2	12.4	18	14.8	12.9	9.9	6.6	2.2	0.7	0.8
AgB01	5609095	5632410	AgB01_g368_t03	-	7797	23	ribosomal rna small subunit methyltransferase nep-1	SL	Telo	N	Y	Y	3.1	2.9	1.1	0.3	0.6	2	1.2	1.3	0.3	0.3	1.3	1.3	2.2	4.5	8	9.5	6.9	10.9	8.8	7.7	5.9	3.5	1.3	0.4	0.5
AgB01	5626402	5642814	AgB01_g369_t01	+	11643	8	ribosomal rna small subunit methyltransferase nep-1	SL		N	N	Y	3.4	3.6	0.6	0	0.5	0.7	0.4	0.3	0.2	0.1	0.5	0.6	0.7	1.4	1.8	1.7	1.8	2.5	1.8	1.6	1.1	0.3	0.3	0.1	0.1
AgB01	5626402	5642814	AgB01_g369_t02	+	10849	9	ribosomal rna small subunit methyltransferase nep-1	SL		N	N	N	3.9	4.6	0.8	0	0.6	1	0.6	0.5	0.2	0.2	0.6	0.8	1	2	2.7	2.7	2.9	3.3	2.3	2.2	1.5	0.5	0.3	0.1	0.1
AgB01	5627160	5642814	AgB01_g369_t03	+	9012	9	ribosomal rna small subunit methyltransferase nep-1	SL		N	Y	N	4	4.5	0.8	0	0.6	0.8	0.4	0.3	0.1	0.1	0.5	0.6	0.9	1.4	2	1.9	2	2.6	1.8	1.7	1.1	0.2	0.3	0.1	0.1
AgB01	5631400	5642814	AgB01_g369_t04	+	6712	7	ribosomal rna small subunit methyltransferase nep-1	SL		N	N	N	2.7	4.6	0.8	0.1	0.6	1	0.5	0.4	0.2	0.1	0.6	0.8	0.6	1.6	2	2.2	2	3.3	2	1.9	1.4	0	0.4	0.1	0.1
AgB01	5631413	5642814	AgB01_g369_t05	+	7935	6	ribosomal rna small subunit methyltransferase nep-1	SL		N	N	N	2.4	3.8	0.6	0	0.5	0.8	0.4	0.3	0.2	0.1	0.6	0.8	0.5	1.4	1.9	1.8	1.8	2.9	1.9	1.7	1.3	0	0.3	0.1	0.1
AgB01	5659565	5660426	AgB01_g370_t01	.	862	1	hypothetical protein			N	Y	Y	0.1	0.6	0.1	0.2	0	0.3	0.2	0.2	0.3	0.1	0.8	0.9	0.6	0.4	0.4	0.2	0.1	0.3	0	0.1	0.2	0	0.1	0	0.1
AgB01	5662086	5664193	AgB01_g371_t01	-	651	2	hypothetical protein			N	Y	Y	0	0	0	0	0	0	0	0	0	0	0	0	0	0	0	0	0	0	0	0	0	0	0	0	0
AgB01	5685687	5751698	AgB01_g372_t01	+	2880	14	Arf-GAP with GTPase, ANK repeat and PH domain-containing protein 3	SL		N	Y	N	13.4	12.5	9.3	8.4	7.5	64.2	70.6	71.3	24.8	10.6	44.4	44.4	60.1	35	25.1	25.4	45.1	37.8	65.7	96.6	46.2	15	44.1	8.8	5.9
AgB01	5710709	5755130	AgB01_g372_t02	+	5429	17	arf-gap with ank repeat and ph domain-containing protein 3	SL		N	N	N	8	7.6	5.2	5.3	4.9	39.2	41.2	42	14.3	7.7	36	30.2	37.1	21.7	17.9	17.4	31.2	33.6	59.5	87.7	44	15.6	45.5	9	5.5
AgB01	5710862	5755130	AgB01_g372_t03	+	5785	16	arf-gap with ank repeat and ph domain-containing protein 3	SL		N	N	N	7.5	7.1	5	5	4.6	36.6	38.5	39.3	13.4	7.2	33.8	28.4	34.9	20.4	16.8	16.3	29.3	31.6	56.2	82.8	41.5	14.6	42.5	8.4	5.1
AgB01	5710875	5755130	AgB01_g372_t04	+	5805	16	Arf-GAP with GTPase, ANK repeat and PH domain-containing protein 3	SL		N	N	Y	7.5	7	4.9	5	4.6	36.4	38.2	39	13.4	7.2	33.5	28.2	34.8	20.3	16.7	16.2	29.2	31.5	55.9	81.2	40.7	14.6	42.3	8.4	5
AgB01	5752148	5755130	AgB01_g372_t05	+	2578	2	Arf-GAP with GTPase, ANK repeat and PH domain-containing protein 3			N	N	N	2.2	1.9	0.8	1.4	1.8	10.8	10.7	10.5	3.6	6	34.6	21.1	17	12.2	15.4	10.9	17.3	28.2	51.3	65.9	38.2	15.4	42.4	8.8	4.4
AgB01	5709617	5721549	AgB01_g373_t01	-	3560	6	spectrin beta brain 1	SL		N	Y	Y	0.2	0.8	0.3	0	0	0.3	0.3	0.3	0.5	0	0.3	0.1	0.1	0.2	0.1	0.2	0	0.2	0.4	2.5	1.3	0	0.1	0.1	0.1
AgB01	5757493	5766339	AgB01_g374_t01	-	765	6	hypothetical protein	SL		N	Y	Y	0.3	0	0.5	0.8	0.4	0.3	0.4	0.4	0.9	0.8	5.9	5.1	3.9	7.3	16.4	11.5	10.3	19.8	15	8.5	7	2.3	3.3	0.4	1.7
AgB01	5769661	5777336	AgB01_g375_t01	+	4344	5	S-phase kinase-associated protein 1	SL	Telo	N	N	Y	3.7	1.2	7.6	3.6	2.4	3.1	2.5	2.6	4.1	5	15.9	15.7	12.7	17.1	24.8	30.6	22.9	37.3	20.2	6.8	8.9	9.2	12.9	4.2	7.8
AgB01	5769661	5777336	AgB01_g375_t02	+	3345	6	S-phase kinase-associated protein 1	SL	Telo	N	Y	N	4.5	1.3	9.6	4.4	3	3.8	3	3.1	4.4	6.3	17.8	18.9	15.8	20.5	28.8	36.4	25.6	38.5	21.2	7.5	9.5	9.3	13.3	4	8.4
AgB01	5778692	5781498	AgB01_g376_t01	-	963	12	hypothetical protein			N	Y	Y	2.4	0.1	3	1.1	0.3	1.4	1	1.4	0.5	0	0	0	0.1	0	0	0	0	0	0	0	0.4	0	0.1	0	5.6
AgB01	5781701	5791669	AgB01_g377_t01	+	1245	14	hypothetical protein			N	Y	Y	0.1	0.4	0.4	0	0	0	0.2	0	0	0.1	0.2	0.1	0	0.1	0.6	0.5	0.1	0.2	0.3	0.8	1.2	2.8	0.3	0.2	1.1
AgB01	5795333	5806897	AgB01_g378_t01	-	3260	7	Neuropeptide receptor 15	SL		N	N	N	1.4	3.9	1	0	0.5	2.2	10.6	9.5	7.9	6.6	22.6	23.6	30.7	30.1	14.6	11.2	5.9	0.5	0.5	0.2	0.9	0.5	1.1	0	0.4
AgB01	5795333	5808806	AgB01_g378_t02	-	1987	8	Neuropeptide receptor 15	SL		N	N	N	1.8	4.3	1.2	2.3	0.6	3.3	16.3	14.9	12.4	10.4	34.9	37.1	48.6	47	22.8	17	8.5	0.8	0.8	0.3	1.4	0.9	1.7	0	0.6
AgB01	5795333	5808806	AgB01_g378_t03	-	2001	8	Neuropeptide receptor 15	SL		N	N	N	1.6	4	1.1	2.3	0.6	3.2	16	14.5	12.6	10.3	34.7	36.9	48.3	46.5	22.6	17	8.4	0.8	0.8	0.3	1.4	0.9	1.6	0	0.6
AgB01	5795333	5808816	AgB01_g378_t04	-	2082	8	Neuropeptide receptor 15	SL		N	N	N	1.5	3.9	1.1	2.2	0.5	3.3	16.3	14.8	12.2	10.3	35.4	36.2	48	46.8	22.7	17.4	9.1	0.8	0.9	0.3	1.4	0.8	1.7	0	0.5
AgB01	5795333	5842454	AgB01_g378_t05	-	4190	9	neuropeptide receptor 15	SL		N	N	Y	0.5	1.9	0.5	1.1	0.2	1.7	8.3	7.6	6.2	5.1	17.5	17.9	23.8	23.3	11.2	8.6	4.6	0.4	0.4	0.1	0.7	0.4	0.9	0	0.3
AgB01	5796460	5841039	AgB01_g378_t06	-	2022	7	Neuropeptide receptor 15	SL		N	Y	N	1	3.4	0.8	2.2	0.5	3.1	16.4	14.9	12.1	7.9	22.4	30.7	40.4	42.5	19.1	15.8	8.4	0.7	0.8	0.2	0.9	0	1.1	0	0.2
AgB01	5806255	5807381	AgB01_g378_t07	-	320	2	hypothetical protein			N	N	N	1.7	2.2	0.3	0	0	0	0	0	0	0	0	0	0	0	0	0	0	0	0	0	0	0	0	0	0
AgB01	5844530	5857240	AgB01_g379_t01	+	7560	4	hypothetical protein		Telo	N	N	Y	5.6	1.2	1.1	4.8	1.5	3.4	3.8	3	1.2	1	5.9	2.6	2.3	3.3	4.9	2.2	2	2.2	2.4	2	1.9	2.3	1.2	1.6	0.3
AgB01	5844530	5857240	AgB01_g379_t02	+	7554	4	hypothetical protein		Telo	N	N	N	5.6	1.2	1.1	0	1.5	3.4	3.8	3	1.2	0.9	5.9	2.5	2.4	3.3	4.9	2.3	2	2.2	2.4	2	1.8	2.3	1.2	1.6	0.3
AgB01	5844530	5857240	AgB01_g379_t03	+	4740	5	hypothetical protein		Telo	N	N	N	8.3	1.7	1.7	7.7	2.2	5.3	6.1	4.8	1.9	1.5	9.3	4	3.7	5.2	7.7	3.5	2.9	3.4	3.6	3.1	2.8	3.3	2	2.5	0.5
AgB01	5844530	5857240	AgB01_g379_t04	+	7503	4	hypothetical protein		Telo	N	N	N	5.1	1.1	1	4.2	1.2	3	3.3	2.7	1.2	0.9	5.6	2.4	2.4	3	4.6	2.1	1.9	2.2	2.3	1.9	1.8	2.3	1.2	1.5	0.3
AgB01	5844735	5857240	AgB01_g379_t05	+	4541	5	hypothetical protein		Telo	N	N	N	8.6	1.8	1.8	8	2.3	5.5	6.3	5	2	1.6	9.7	4.3	3.9	5.4	8.1	3.6	3	3.6	3.8	3.2	3	3.4	2	2.6	0.5
AgB01	5845991	5857240	AgB01_g379_t06	+	4500	5	hypothetical protein		Telo	N	N	N	8.7	1.8	1.8	8	2.3	5.6	6.4	5	2	1.6	10	4.3	4	5.5	8.3	3.8	3.1	3.7	3.9	3.2	3	3.5	2.1	2.6	0.5
AgB01	5847538	5857240	AgB01_g379_t07	+	4553	4	hypothetical protein		Telo	N	Y	N	8.6	1.8	1.8	7.9	2.3	5.5	6.3	5	2	1.6	9.7	4.1	3.9	5.3	8	3.6	3	3.5	3.8	3.1	2.9	3.4	2	2.6	0.5
AgB01	5859773	5870828	AgB01_g380_t01	+	2263	12	Bestrophin-1			N	N	Y	1.9	1.2	3.2	1.2	1.3	3.4	3.6	3.3	6.5	4.8	3.4	2.6	4.1	5.3	3.3	2.5	1.6	3.1	4.8	5.3	3.6	3.8	2.8	3	29.5
AgB01	5859773	5870828	AgB01_g380_t02	+	1751	13	bestrophin-1			N	N	N	2.3	1.6	4	1.5	1.7	4.5	4.6	4.3	8.4	6.2	4.6	3.3	5.3	7.1	4.2	3.3	2	3.7	5.4	6.3	4	3.9	3.6	3.8	38.2
AgB01	5859774	5870828	AgB01_g380_t03	+	1676	13	Bestrophin-1			N	Y	N	2.2	1.6	4.1	1.5	1.8	4.4	4.7	4.4	8.6	5.7	4.3	3.4	5.5	7	4.3	3.3	2.1	3.8	5.4	6.4	4	4.1	3.7	3.9	38.2
AgB01	5873295	5883237	AgB01_g381_t01	+	8320	4	Uncharacterized protein F10E9.4	SL	Telo	N	N	Y	2.7	0.5	0.4	0.2	0.8	1.7	1.3	1.3	4.5	2.4	3.7	3.1	2.5	5	4.3	4.5	3.6	5.5	4.6	4.6	5.4	1	1.2	0.9	0.6
AgB01	5873295	5883237	AgB01_g381_t02	+	8039	5	Uncharacterized protein F10E9.4	SL	Telo	N	Y	N	2.8	0.4	0.4	0.2	0.8	1.8	1.3	1.4	3.4	1.9	3.9	3.3	2.5	5.1	4.5	4.6	3.8	5.8	4.8	4.7	5.7	1.1	1.4	0.9	0.6
AgB01	5873334	5883237	AgB01_g381_t03	+	3354	9	Uncharacterized protein F10E9.4	SL	Telo	N	N	N	6.3	1.3	0.9	0.4	1.7	4.1	3.1	3.3	11.7	7.2	8.5	7.2	5.6	11.9	9.7	10.3	8.7	12	9.7	9	11.3	2.6	2.8	1.8	1.1
AgB01	5881170	5892930	AgB01_g382_t01	-	3179	10	glycosylation related family member (gly-15)	SL		N	N	Y	2.9	5.4	0.1	0.1	0.2	0	0.1	0	79.4	35.6	1.2	1.7	1.4	0.6	0.4	0.4	0.2	0.5	0.4	0.1	0.5	0	0.3	0.1	0
AgB01	5882990	5892930	AgB01_g382_t02	-	1644	10	glycosylation related family member (gly-15)	SL		N	Y	N	5.4	11.7	0.3	0.1	0.3	0	0.1	0	156.2	69	1.1	2.5	2.5	0.2	0.1	0.2	0.1	0.1	0	0	0.1	0	0	0	0
AgB01	5888422	5890119	AgB01_g382_t03	-	304	3	Beta-1,3-galactosyl-O-glycosyl-glycoprotein beta-1,6-N-acetylglucosaminyltransferase 4			N	N	N	6.8	11.7	0.4	0	0.2	0	0.1	0.1	154.6	31.4	0.1	1	0.5	0.1	0	0.1	0	0	0	0	0	0	0	0	0
AgB01	5890194	5891806	AgB01_g382_t04	-	864	2	Beta-1,3-galactosyl-O-glycosyl-glycoprotein beta-1,6-N-acetylglucosaminyltransferase 3			N	N	N	3	5.7	0.3	0.1	0	0	0	0	54.9	42.6	0.4	1.2	0.9	0.2	0.1	0.1	0.1	0	0	0	0	0	0	0	0
AgB01	5901285	5901905	AgB01_g383_t01	+	383	2	e3 ubiquitin-protein ligase ubr3			N	Y	Y	4	5.5	3.8	1.2	1.3	3.9	1.4	1.8	3.7	1	0.6	0.4	1	3.1	3.7	5.4	3.4	9.1	10.7	10	6.4	0	0.7	0.7	1.9
AgB01	5915732	5974643	AgB01_g384_t01	+	6491	24	formin-like protein			N	N	Y	7.4	2.2	5.3	0.8	2.9	7.7	8.8	8.5	5.7	1.1	2.6	3.2	4.3	5.1	4.5	3.9	3.9	3.7	3.6	7.7	5.4	5.6	9.2	6.9	3.2
AgB01	5915732	5974643	AgB01_g384_t02	+	6491	24	formin-like protein			N	N	N	9.6	2.8	6.6	1	3.5	9.9	11.6	11.2	7.2	1.4	3.8	4	6	6.5	6	4.9	5	4.9	5	10.7	7.5	6.9	12.6	9.7	4.2
AgB01	5915732	5974643	AgB01_g384_t03	+	6491	25	formin-like protein			N	N	N	9.6	2.8	6.6	1	3.5	9.9	11.6	11.2	7.2	1.4	3.8	4	6	6.5	6	4.9	5	4.9	5	10.7	7.5	6.9	12.6	9.7	4.2
AgB01	5915791	5974643	AgB01_g384_t04	+	6438	24	formin-like protein			N	N	N	9.6	2.9	6.6	1	3.4	10	11.7	11.2	7.3	1.4	3.8	4.1	6	6.5	6	4.9	5.1	4.9	5	10.8	7.5	7	12.7	9.8	4.2
AgB01	5915791	5974643	AgB01_g384_t05	+	6438	24	formin-like protein			N	N	N	9.6	2.9	6.6	0	3.4	10	11.7	11.2	7.3	1.4	3.8	4.1	6	6.5	6	4.9	5.1	4.9	5	10.8	7.5	7	12.7	9.8	4.2
AgB01	5915791	5974643	AgB01_g384_t06	+	6438	25	formin-like protein			N	N	N	9.6	2.9	6.6	1	3.4	10	11.7	11.2	7.3	1.4	3.8	4.1	6	6.5	6	4.9	5.1	4.9	5	10.8	7.5	7	12.7	9.8	4.2
AgB01	5915791	5974643	AgB01_g384_t07	+	6438	25	formin-like protein			N	N	N	9.6	2.9	6.6	1	3.4	10	11.7	11.2	7.3	1.4	3.8	4.1	6	6.5	6	4.9	5.1	4.9	5	10.8	7.5	7	12.7	9.8	4.2
AgB01	5916093	5974643	AgB01_g384_t08	+	6438	24	formin-like protein			N	N	N	9.6	2.9	6.6	1	3.4	10	11.7	11.2	7.3	1.4	3.8	4.1	6	6.5	6	4.9	5.1	4.9	5	10.8	7.5	7	12.7	9.8	4.2
AgB01	5926367	5974643	AgB01_g384_t09	+	6304	24	formin-like protein			N	N	N	9.7	2.9	6.7	1	3.5	10.2	11.9	11.4	7.5	1.4	3.8	4	6.1	6.5	6	5	5.2	5	5.2	11	7.7	7.1	12.9	10	4.3
AgB01	5940024	5974643	AgB01_g384_t10	+	6304	23	formin-like protein			N	Y	N	7.5	2.3	5.5	0.8	2.8	7.9	9.1	8.7	5.9	1.1	2.7	3.2	4.3	5	4.5	3.9	4	3.7	3.7	7.9	5.5	5.8	9.4	7.1	3.3
AgB01	5971575	5977609	AgB01_g385_t01	-	3498	3	formin-like protein			N	Y	Y	1.2	0.2	0.2	0.2	0.2	0.5	0.4	0.5	0.6	0.3	1.4	0.8	0.6	1.1	1.9	0.8	0.9	1	1.3	2.7	2.5	1.5	4	3.1	1.1
AgB01	5980538	5994824	AgB01_g386_t01	-	3601	21	protein phosphatase phlpp-like protein			N	Y	N	0.1	0.3	0.1	0	0.1	7.4	12.8	11.5	3	0.8	5.7	4.9	5.6	8.3	4	3.5	1.4	0.5	0.2	2.8	10.1	0.5	0.5	0.6	0
AgB01	5980538	5994824	AgB01_g386_t02	-	3659	21	protein phosphatase phlpp-like protein			N	N	N	0.1	0.3	0	0.1	0.1	7.4	12.8	11.6	2.9	0.8	5.9	5	6.2	8.4	4	3.6	1.3	0.5	0.2	2.8	9.8	0.5	0.5	0.5	0
AgB01	5980538	6000015	AgB01_g386_t03	-	4166	24	protein phosphatase phlpp-like protein	SL		N	N	Y	0.1	0.3	0.1	0	0.1	6.6	11.4	10.2	2.6	0.7	5.3	4.5	5.5	7.5	3.7	3.3	1.2	0.5	0.2	2.7	9.7	0.4	0.5	0.5	0
AgB01	5980538	6002711	AgB01_g386_t04	-	3950	19	protein phosphatase phlpp-like protein	SL		N	N	N	0.2	0.4	0.1	0.1	0.1	7	12	10.8	2.8	0.6	5.2	4.5	5.7	7.6	3.5	3.4	1.2	0.4	0.2	2.3	8.5	0.4	0.5	0.6	0
AgB01	6004786	6012448	AgB01_g387_t01	-	5827	2	Low affinity immunoglobulin epsilon Fc receptor			N	N	Y	13.2	9.3	0.8	0	0.3	0	0	0	0	0	0.1	0.1	0.2	0.2	0.2	0.2	0.1	0.7	0.3	0.4	0.3	0.3	0.1	0.1	0
AgB01	6004786	6012990	AgB01_g387_t02	-	3045	5	Low affinity immunoglobulin epsilon Fc receptor			N	N	N	22.6	12.4	1.1	0.1	0.5	0	0	0	0	0	0.2	0.2	0.4	0.2	0.2	0.2	0.1	0.8	0.4	0.6	0.3	0.6	0.2	0.1	0
AgB01	6004786	6012998	AgB01_g387_t03	-	2944	4	low affinity immunoglobulin epsilon fc receptor			N	N	N	21.5	11.4	1	0.1	0.5	0	0	0	0	0	0.2	0.2	0.4	0.2	0.3	0.2	0.1	0.9	0.5	0.6	0.4	0.6	0.2	0.1	0
AgB01	6004786	6013002	AgB01_g387_t04	-	2959	5	Low affinity immunoglobulin epsilon Fc receptor			N	Y	N	22.4	11.9	1.1	0.1	0.5	0	0	0	0	0	0.2	0.2	0.4	0.2	0.2	0.2	0.1	0.8	0.5	0.6	0.4	0.6	0.2	0.1	0
AgB01	6004786	6013690	AgB01_g387_t05	-	3668	5	Low affinity immunoglobulin epsilon Fc receptor			N	N	N	18.9	10.3	0.9	0	0.4	0	0	0	0	0	0.2	0.1	0.4	0.2	0.2	0.2	0.1	1	0.5	0.6	0.5	0.5	0.1	0.1	0
AgB01	6004786	6013831	AgB01_g387_t06	-	3045	5	Low affinity immunoglobulin epsilon Fc receptor			N	N	N	22.6	12.4	1.1	0.1	0.5	0	0	0	0	0	0.2	0.2	0.4	0.2	0.2	0.2	0.1	0.8	0.4	0.6	0.3	0.6	0.2	0.1	0
AgB01	6004786	6013839	AgB01_g387_t07	-	2944	4	low affinity immunoglobulin epsilon fc receptor			N	N	N	21.5	11.4	1	0.1	0.5	0	0	0	0	0	0.2	0.2	0.4	0.2	0.3	0.2	0.1	0.9	0.5	0.6	0.4	0.6	0.2	0.1	0
AgB01	6004786	6013843	AgB01_g387_t08	-	2959	5	Low affinity immunoglobulin epsilon Fc receptor			N	N	N	22.4	11.9	1.1	0.1	0.5	0	0	0	0	0	0.2	0.2	0.4	0.2	0.2	0.2	0.1	0.8	0.5	0.6	0.4	0.6	0.2	0.1	0
AgB01	6010985	6012434	AgB01_g387_t09	-	742	2	Low affinity immunoglobulin epsilon Fc receptor			N	N	N	14.5	11	1.3	0.2	0	0	0	0	0	0	0.1	0	0	0.3	0.2	0.3	0	1.2	0.8	0.7	1.1	0	0	0	0
AgB01	6017362	6020345	AgB01_g388_t01	-	636	4	hypothetical protein	SL		N	Y	Y	6.7	0.9	2.2	1.5	2.4	7.3	9.1	8.8	2.6	3.2	11.6	9.6	7.1	28.9	21.8	17.5	14.1	37.5	26.7	17.7	19.2	8.2	5.1	2.9	1.4
AgB01	6024641	6031698	AgB01_g389_t01	+	3377	7	Nucleoporin seh1-A	SL		N	Y	N	12.8	1.5	2	2.9	3.6	16.2	12.6	12.7	6.5	3.5	20.1	15.6	11.9	28	20.3	16.1	9.3	18.7	15.8	8.9	6.8	4.1	2.4	1.6	1.3
AgB01	6024674	6031698	AgB01_g389_t02	+	3365	7	nucleoporin seh1-a	SL		N	N	N	12.6	1.4	2	2.7	3.6	15.9	12.4	12.3	6.2	3.5	20	15.6	11.8	27.8	20	15.9	9.3	18.5	15.7	8.8	6.8	3.6	2.4	1.6	1.3
AgB01	6029136	6041201	AgB01_g389_t03	+	6849	6	3-ketodihydrosphingosine reductase			N	N	Y	3.8	3.1	1.2	0.5	0.9	3	1.9	1.9	1.6	1.9	10	6	5.3	8.8	7.1	6.2	3.4	7.3	6	3.5	3.6	2	1.4	0.9	0.6
AgB01	6031963	6032912	AgB01_g389_t04	+	624	2	3-ketodihydrosphingosine reductase			N	N	N	4.4	1.8	1	1	1	5	2.4	2.3	2.3	4.1	11	8.2	5.9	11.6	8.6	9.2	5.2	9.2	6.7	4.2	4.5	2.8	0.6	0.8	0.3
AgB01	6031963	6041201	AgB01_g389_t05	+	3890	6	3-ketodihydrosphingosine reductase			N	N	N	5.3	5.1	1.8	0.7	1.3	3.8	2.4	2.1	1.9	2.1	9.1	6.4	7.9	10.1	6.8	6.8	3.8	7.4	6.2	3.6	4.2	3.6	1.5	0.9	0.5
AgB01	6043522	6044637	AgB01_g390_t01	+	574	2	hypothetical protein			N	Y	Y	1.4	1.6	0.5	0.5	0	0	0	0	0	0	0.1	0.1	0.2	0.3	0.2	0.1	0.2	0.1	0.1	0.1	0	0	0	0	0.1
AgB01	6046925	6048021	AgB01_g391_t01	+	444	2	hypothetical protein			N	Y	Y	1.2	3.1	0.2	0.1	0	0	0	0	0	0	0.4	0.4	0.6	0.4	0.6	0.7	0.2	0	0.2	0.2	0.7	0	0.1	0	0
AgB01	6050261	6071766	AgB01_g392_t01	-	3822	13	Small G protein signaling modulator 1, partial			N	Y	N	0.2	0.3	1.8	1.4	1.4	10.2	15.6	16.4	2.3	3.1	3.9	3.2	1.4	6	2.7	2.1	0.4	0.2	0.2	0.6	2.7	9.5	0.5	0.1	0
AgB01	6050261	6071768	AgB01_g392_t02	-	3876	13	Small G protein signaling modulator 1, partial			N	N	Y	0.2	0.3	1.8	1.4	1.4	10.4	15.9	16.9	2.5	3.1	3.9	3.1	1.4	6	2.7	2.1	0.4	0.2	0.2	0.5	2.7	9.4	0.5	0.1	0
AgB01	6050261	6071768	AgB01_g392_t03	-	3876	13	Small G protein signaling modulator 1, partial			N	N	N	0.2	0.3	1.8	1.4	1.4	10.4	15.9	16.9	2.5	3.1	3.9	3.1	1.4	6	2.7	2.1	0.4	0.2	0.2	0.5	2.7	9.4	0.5	0.1	0
AgB01	6050261	6071768	AgB01_g392_t04	-	3870	13	Small G protein signaling modulator 1, partial			N	N	N	0.2	0.3	1.8	1.4	1.4	10.4	15.9	16.9	2.5	3	3.9	3.1	1.4	5.9	2.6	2.1	0.4	0.2	0.1	0.5	2.7	9.4	0.5	0.1	0
AgB01	6050261	6071768	AgB01_g392_t05	-	3870	13	Small G protein signaling modulator 1, partial			N	N	N	0.2	0.3	1.8	1.4	1.4	10.4	15.9	16.9	2.5	3	3.9	3.1	1.4	5.9	2.6	2.1	0.4	0.2	0.1	0.5	2.7	9.4	0.5	0.1	0
AgB01	6072300	6072552	AgB01_g393_t01	.	253	1	Small G protein signaling modulator 1, partial			N	Y	Y	1.2	0	5.2	8.8	6.5	61.2	100.5	102.4	19.6	4.1	6	11.2	16.5	14.9	4	4.6	9.5	0.4	0.5	0.8	2.6	20.5	0.6	0.1	0
AgB01	6073096	6105213	AgB01_g394_t01	-	859	6	Small G protein signaling modulator 1, partial			N	Y	Y	0.1	0	0.3	0.8	0.7	8.2	18.4	18.6	6	2	4.2	4	7.9	3.6	1.1	0.9	0.1	0	0	0.1	1.2	6	0.2	0	0
AgB01	6137802	6148636	AgB01_g395_t01	-	7183	5	ankyrin-2			N	N	N	4	2.1	1	0.6	1.1	3.8	3.1	2.8	2.3	3	7.9	7.6	7	17.5	17.3	14.7	6.4	7	5.3	5.9	8.7	8.7	8.5	8.6	7.1
AgB01	6137802	6153510	AgB01_g395_t02	-	8433	11	Ankyrin-1			N	N	N	6.2	2.1	1	0	1.5	8.6	6.9	7.2	3.6	3	10	11	12.2	27.7	21.3	21.9	10.2	7.9	5	5.4	8	7.6	7.4	7.3	6.1
AgB01	6137802	6158196	AgB01_g395_t03	-	8824	16	Ankyrin-1			N	N	N	7.2	2.1	1.1	0.5	1.8	11.2	8.8	8.8	4.3	3.2	11.9	14.1	16.7	34.8	25.9	26.8	13.6	8.7	5	5.3	7.9	7.2	7.1	7	5.9
AgB01	6137802	6159676	AgB01_g395_t04	-	8891	17	ankyrin-2			N	N	N	7.1	2.1	1.1	0.5	1.7	11.2	8.7	8.8	4.3	3.3	12.4	15.3	18.3	35.5	26.7	26.9	14.1	8.7	4.9	5.3	7.9	7.2	7.1	7	5.9
AgB01	6137802	6159681	AgB01_g395_t05	-	8914	17	Ankyrin-1			N	Y	Y	6.9	2.1	1	0.5	1.6	10.5	8.3	8.5	4.1	3.2	11.7	14.2	16.4	33.8	25.6	25.7	13	8.5	4.9	5.3	7.8	7.2	7.1	7	5.9
AgB01	6154405	6158518	AgB01_g395_t06	-	757	3	ankyrin-2			N	N	N	10.3	0.8	0.8	0	2.1	21.1	15.5	12.9	6.4	4.7	30.7	48.8	69.3	82.3	65	57.1	41.7	11.5	1.2	1.8	3.2	0	0.4	0.2	0.2
AgB01	6154405	6159668	AgB01_g395_t07	-	503	4	ankyrin-2			N	N	N	14	1.2	1.2	0	3.1	31.4	23.3	19.5	9.7	7.3	45.9	74.8	109.2	124.1	96.7	84.4	61.2	16.8	1.7	2.7	4.7	0	0.6	0.3	0.3
AgB01	6154738	6155160	AgB01_g396_t01	.	423	1	ankyrin-2			N	Y	Y	2.9	0.2	0.1	0	0	4.7	2.6	2.8	1.3	0.4	4.6	5.4	5.4	17	8.1	9.4	4.4	2.5	0.7	0.3	0.3	0	0.1	0	0.1
AgB01	6165809	6167938	AgB01_g397_t01	+	2130	1	hypothetical protein	SL		N	N	Y	0	0	0	0	0	0	0	0	0	0	0.3	0.7	0.7	2.2	0.9	0.5	0.4	0	0	0	59	0	0	0	0
AgB01	6165809	6170987	AgB01_g397_t02	+	1484	6	hypothetical protein	SL		N	Y	N	0	0	0	0	0	0	0	0	0	0	0.8	1.3	1.1	4.4	2.5	1	0.6	0.1	0	0	164.1	0	0.1	0	0
AgB01	6168301	6168760	AgB01_g397_t03	+	460	1	hypothetical protein			N	N	N	0	0.1	0	0	0	0	0	0	0	0	0.5	0.1	0.3	1.1	0.5	0.1	0.5	0	0	0	27.5	0	0	0	0
AgB01	6169002	6169667	AgB01_g397_t04	+	666	1	hypothetical protein			N	N	N	0	0	0	0	0	0	0	0	0	0	0.3	0.5	0.4	1.2	0.6	0.3	0.1	0	0.1	0	32.3	0	0	0	0
AgB01	6169871	6170987	AgB01_g397_t05	+	1117	1	hypothetical protein			N	N	N	0	0	0	0	0	0	0	0	0	0	0.3	0	0.1	0.8	0.6	0	0	0.1	0	0	37.5	0	0	0	0
AgB01	6171387	6183372	AgB01_g398_t01	-	1956	11	cre-snf-12 protein	SL		N	N	N	3.2	2.6	0.7	0	0.1	31.4	53.8	52.5	21.9	15.6	57.7	62.1	85.8	75.1	20	19.4	9.5	0.9	0.4	1.2	3.5	1.8	4.2	1.5	0.1
AgB01	6172921	6183372	AgB01_g398_t02	-	1714	11	cre-snf-12 protein	SL		N	N	N	3.7	3	0.8	0.2	0.1	35.1	60.2	58.4	24.7	17.8	65.5	70.5	97.8	85.6	22.8	22.1	10.7	1	0.4	1.4	3.9	2	4.6	1.7	0.2
AgB01	6173366	6182290	AgB01_g398_t03	-	4347	6	cre-snf-12 protein	SL		N	N	Y	1.5	1.2	0.3	0.1	0	14.3	24.4	23.5	10.2	8.2	31.9	30	40	36	9.8	9	4.4	0.5	0.2	0.5	1.5	0.8	2.2	0.8	0.1
AgB01	6173366	6182290	AgB01_g398_t04	-	3625	7	cre-snf-12 protein	SL		N	Y	N	1.7	1.5	0.4	0.1	0	16.9	29.3	28.3	12.3	9.9	38.8	36.2	47.9	43.9	11.9	11	5.4	0.6	0.2	0.6	1.8	1	2.6	0.9	0.1
AgB01	6173366	6183372	AgB01_g398_t05	-	2876	10	cre-snf-12 protein	SL		N	N	N	2.4	1.9	0.4	0.1	0	21.4	36.9	35.6	15.6	12.5	49	45.6	60.3	55.3	15.2	14	6.8	0.8	0.3	0.9	2.6	1.2	3.4	1.2	0.1
AgB01	6173366	6183372	AgB01_g398_t06	-	2354	11	cre-snf-12 protein	SL		N	N	N	2.8	2.2	0.5	0.2	0.1	25.6	43.8	42.4	18.1	13.3	51	52.5	71.9	64	17.3	16.3	7.8	0.8	0.3	1	3	1.5	3.5	1.3	0.1
AgB01	6173366	6183372	AgB01_g398_t07	-	2362	11	cre-snf-12 protein	SL		N	N	N	2.8	2.2	0.5	0.2	0.1	25.6	43.6	42.3	18	13.3	51	52.3	71.8	63.8	17.2	16.2	7.8	0.8	0.3	1	2.9	1.5	3.5	1.3	0.1
AgB01	6186658	6194234	AgB01_g399_t01	-	2559	8	sodium-dependent dopamine transporter			N	N	Y	0.5	0	0	0	0.2	0.4	0.1	0.2	0.4	0	0.3	0.3	0	0.3	0.9	1.5	0.6	0.5	0.1	0.4	1.6	1.4	0.7	0.4	0
AgB01	6190002	6192095	AgB01_g399_t02	-	847	3	Transporter			N	Y	N	0.1	0	0	0	0.5	0.5	0.2	0.1	0.4	0	0.4	0.5	0	0.5	1.5	2.6	0.8	0.5	0.2	0	1	4.1	1	0.6	0
AgB01	6195805	6202367	AgB01_g400_t01	-	2010	7	trna (guanine-n -)-methyltransferase subunit trm82	SL	Telo	N	N	N	16.5	3.3	2.8	1.5	8.1	25.9	14.9	12.2	7.1	4.8	20.9	17.9	18.4	24.6	14.9	24	19.6	19.1	16.8	12.5	13	10.3	15	7	4.4
AgB01	6195805	6202484	AgB01_g400_t02	-	2118	7	trna (guanine-n -)-methyltransferase subunit trm82	SL	Telo	N	Y	N	15.7	3.1	2.6	1.3	7.6	24.8	14.2	11.7	6.9	4.6	20	17	17.5	23.5	14.1	22.9	18.8	18.2	15.9	12	12.6	9.8	14.3	6.7	4.2
AgB01	6195805	6202905	AgB01_g400_t03	-	3454	6	trna (guanine-n -)-methyltransferase subunit trm82	SL	Telo	N	N	Y	9.8	1.9	1.6	0.8	4.7	15.2	8.8	7.2	4.2	2.9	12.4	10.8	11	14.5	8.9	14	11.6	11.2	9.8	7.4	7.6	6.5	8.8	4.1	2.6
AgB01	6203343	6232278	AgB01_g401_t01	+	7323	21	N-alpha-acetyltransferase 15, NatA auxiliary subunit	SL	Telo	N	N	N	13.1	10.2	6.7	5.2	3.9	11.2	5.1	5	3.2	1.9	2.7	2.9	4.2	4	8.6	10	10	13.1	10.3	10	6.4	6.6	3.4	3.6	1.8
AgB01	6204422	6232278	AgB01_g401_t02	+	6244	21	N-alpha-acetyltransferase 15, NatA auxiliary subunit	SL	Telo	N	N	N	15.2	12	7.9	6.1	4.5	13.1	5.9	5.8	3.8	2.2	3.1	3.4	4.9	4.6	10.1	11.7	11.7	15.3	12.1	11.7	7.4	7.8	3.9	4.2	2.1
AgB01	6204422	6232278	AgB01_g401_t03	+	6244	22	N-alpha-acetyltransferase 15, NatA auxiliary subunit	SL	Telo	N	N	N	15.2	12	7.9	6.1	4.5	13.1	5.9	5.8	3.8	2.2	3.1	3.4	4.9	4.6	10.1	11.7	11.7	15.3	12.1	11.7	7.4	7.8	3.9	4.2	2.1
AgB01	6207521	6232278	AgB01_g401_t04	+	6196	21	N-alpha-acetyltransferase 15, NatA auxiliary subunit	SL	Telo	N	N	N	15.3	12.1	7.9	6.2	4.6	13.2	6	5.9	3.8	2.2	3.2	3.4	4.9	4.6	10.2	11.7	11.8	15.4	12.2	11.7	7.5	7.8	4	4.2	2.1
AgB01	6207521	6232278	AgB01_g401_t05	+	6196	21	N-alpha-acetyltransferase 15, NatA auxiliary subunit	SL	Telo	N	Y	N	15.3	12.1	7.9	6.2	4.6	13.2	6	5.9	3.8	2.2	3.2	3.4	4.9	4.6	10.2	11.7	11.8	15.4	12.2	11.7	7.5	7.8	4	4.2	2.1
AgB01	6208573	6232278	AgB01_g401_t06	+	8080	19	N-alpha-acetyltransferase 15, NatA auxiliary subunit	SL	Telo	N	N	Y	11.7	9.2	6.1	4.7	3.5	10.1	4.5	4.5	2.9	1.7	2.5	2.7	3.8	3.6	8	9.1	9.3	12	9.6	9.4	5.9	6.2	3	3.2	1.7
AgB01	6232849	6243915	AgB01_g402_t01	+	2820	11	ES2-like protein	SL		N	Y	Y	21.4	5.7	4.5	1.7	6.5	24.9	18.3	15.5	1.5	0.5	2.3	2.8	3.6	4.9	7.8	9.8	11.6	7.7	8.8	7.8	5.9	4.9	1.8	1	0.6
AgB01	6254358	6272291	AgB01_g403_t01	+	3449	14	Cell division protein kinase 12			N	N	N	22.6	2.6	5.8	3.1	4.4	35.4	28.9	26.5	2	2	5.7	10.1	32.3	12.3	16.9	24	59.4	17.3	18.7	22.9	14.1	15.5	3.6	0.9	2.3
AgB01	6254358	6282590	AgB01_g403_t02	+	5637	15	Cell division protein kinase 12			N	N	Y	14.7	1.8	3.9	2.2	3.1	23.2	18.5	17.2	1.6	1.9	7.2	10.3	23.3	11.2	14.8	19.8	42.1	14.5	14.2	16.3	9.8	12.9	3.1	0.9	2.8
AgB01	6254358	6282590	AgB01_g403_t03	+	5637	16	Cell division protein kinase 12			N	N	N	15.8	1.9	4.1	2.5	3.4	24.9	19.5	18.2	2	3.1	15	19.6	34.9	17.1	20.7	26.5	51.2	19.1	17.3	18.6	10.9	14.1	3.9	1.3	4.1
AgB01	6254358	6282590	AgB01_g403_t04	+	3533	16	Cell division protein kinase 12			N	Y	N	22.6	2.5	5.9	3.2	4.5	35.7	28.7	26.5	2.2	2.3	6.4	12.1	33.6	14.2	18.5	26.3	62.4	18.8	19.4	23.3	14	17.6	3.8	1	3.2
AgB01	6254680	6270703	AgB01_g403_t05	+	4917	14	Cell division protein kinase 12			N	N	N	14.2	1.7	3.9	2	2.7	23.2	18.8	17.2	1.2	1.3	3.4	6.1	21.2	7.6	10.9	15.3	37.7	10.1	11.1	13.8	8.2	9.8	2	0.5	1.4
AgB01	6266758	6270703	AgB01_g403_t06	+	3946	1	Cell division protein kinase 12			N	N	N	2.8	0.6	0.8	0.3	0.6	3.5	2.7	2.6	0.5	0.4	0.8	1.4	1.7	1.8	2.8	3.5	3.6	2.4	2.2	2.6	1.6	2.2	0.5	0.1	0.4
AgB01	6281175	6290056	AgB01_g404_t01	-	2893	4	hypothetical protein	SL		N	Y	N	10.5	1.1	2.7	3.9	4.5	21.9	11.9	11.9	4.6	7.5	45.3	50	57.6	51.3	43	54.7	59.9	39.4	30	21.6	13	12	6.3	3.4	11.1
AgB01	6281175	6291395	AgB01_g404_t02	-	6699	4	hypothetical protein	SL		N	N	Y	4.4	0.6	1.2	1.6	1.8	8.8	4.8	4.7	1.9	2.9	17.4	19.7	23.5	20.8	17	21.6	24	16	12.7	9.9	6.4	5.9	2.3	1.3	4.3
AgB01	6294141	6299932	AgB01_g405_t01	+	769	3	Probable mitochondrial pyruvate carrier 1			N	N	N	19	6.7	4.6	2.8	2.6	12.2	15.5	14.5	11.9	13.5	29.7	52.7	50.6	57.1	42.8	24.1	15.9	9.2	8	11	6.8	11.2	28	26.1	7.2
AgB01	6294211	6297993	AgB01_g405_t02	+	1742	3	Probable mitochondrial pyruvate carrier 1			N	Y	N	10.7	5.1	2.4	1.3	1.2	6.7	8	7.6	5.9	8	22.8	30.3	28.8	33.3	33	17.3	10.5	7.5	6.6	8.5	5.7	7.9	24.1	28.4	5.7
AgB01	6294211	6302804	AgB01_g405_t03	+	2978	3	Probable mitochondrial pyruvate carrier 1			N	N	N	13.8	7	2.2	0	0.8	4.6	6.1	6.4	5.2	6.6	22.1	22	19	26.3	24.3	13.4	8	6.6	5.8	7.4	5.4	4.1	24.2	24.6	5.6
AgB01	6294303	6302804	AgB01_g405_t04	+	2886	4	Probable mitochondrial pyruvate carrier 1			N	N	N	14.2	7.2	2.2	1	0.9	4.8	6.3	6.6	5.4	6.8	22.8	22.7	19.7	27.2	25.1	13.8	8.2	6.8	6	7.6	5.6	4.2	24.9	25.3	5.7
AgB01	6294303	6302804	AgB01_g405_t05	+	2886	4	Probable mitochondrial pyruvate carrier 1			N	N	N	14.2	7.2	2.2	1	0.9	4.8	6.3	6.6	5.4	6.8	22.8	22.7	19.7	27.2	25.1	13.8	8.2	6.8	6	7.6	5.6	4.2	24.9	25.3	5.7
AgB01	6294303	6302804	AgB01_g405_t06	+	2886	4	Probable mitochondrial pyruvate carrier 1			N	N	N	14.2	7.1	2.2	1	0.9	4.8	6.3	6.6	5.4	6.8	22.8	22.7	19.7	27.3	25.6	13.9	8.1	6.9	6.1	7.8	5.6	4.8	24.8	25.9	5.6
AgB01	6298518	6302804	AgB01_g405_t07	+	3256	2	hypothetical protein			N	N	Y	9.7	5.6	1.2	0.4	0.4	2.2	2.7	3.3	3	3.6	15.1	9.9	7.5	13.3	14.2	8.1	4.1	4.5	3.9	4.8	3.7	2.1	18.5	18.6	3.9
AgB01	6298591	6299932	AgB01_g405_t08	+	904	2	hypothetical protein			N	N	N	11.7	8.5	1.8	0.7	1.3	4	4.5	4.3	5.6	6.7	22.1	19.9	19.5	19.8	21.8	13.4	8.3	7.1	5.6	6.9	5.4	9.6	30.5	29	6.7
AgB01	6305071	6307358	AgB01_g406_t01	+	2288	1	hypothetical protein			N	N	N	0.8	1.9	0.2	0	0	0	0	0	0	0	0.1	0.1	0	0.2	0	0	0	0	0	0	0	0	0	0.2	0.1
AgB01	6305326	6331932	AgB01_g406_t02	+	2375	12	Coronin-like protein cor-1	SL		N	N	Y	15.6	4.3	13.3	18.1	10.1	76.6	87.2	92.7	38.7	27	71.2	75.6	91.5	99.8	35	28.8	14.7	7.4	6.5	9.6	45.6	59	23.5	54.6	24.9
AgB01	6305326	6331932	AgB01_g406_t03	+	2375	13	Coronin-like protein cor-1	SL		N	Y	N	16.1	4.3	13.5	18.2	10.3	77.1	88.3	94.1	39.8	27.2	72.2	75.9	91.9	100.2	35.6	29.2	14.8	7.5	6.7	9.8	46.2	59	24.1	55.8	25.3
AgB01	6313155	6331932	AgB01_g406_t04	+	2315	11	Coronin-like protein cor-1	SL		N	N	N	16.6	4.4	13.8	18.7	10.5	79.1	90.5	96.5	40.8	28.1	74.4	78.1	94.5	103	36.7	30.1	15.2	7.7	6.9	10	47.4	59.7	24.7	56.9	25.8
AgB01	6313156	6331932	AgB01_g406_t05	+	2314	11	Coronin-like protein cor-1	SL		N	N	N	16.6	4.4	13.8	18.7	10.5	79.1	90.5	96.6	40.7	28.1	74.4	78	94.5	103	36.7	30	15.2	7.7	6.9	10	47.4	60.5	24.5	57	25.8
AgB01	6313158	6326712	AgB01_g406_t06	+	1499	8	Coronin-like protein cor-1	SL		N	N	N	19.4	5	16.2	0	11.1	100.6	110.7	118.4	44.3	28.2	70.8	71.9	80.6	116.6	38.4	28.9	13.3	9.2	8	11.7	58.4	49.6	26.3	57.4	28.6
AgB01	6313158	6331932	AgB01_g406_t07	+	2341	11	Coronin-like protein cor-1	SL		N	N	N	15.6	4.2	13.3	18.1	9.9	76.5	86.5	92.3	38.8	25.8	67.5	71.4	85.2	96.9	34	27.9	14.3	7.3	6.5	9.6	45.2	56.9	23.3	53.8	24.1
AgB01	6313158	6331932	AgB01_g406_t08	+	2341	11	Coronin-like protein cor-1	SL		N	N	N	16.2	4.3	13.4	18.2	10.1	77	87.6	93.7	39.9	26	68.5	71.7	85.6	97.4	34.5	28.2	14.5	7.4	6.6	9.8	45.7	57.6	23.9	55.3	24.6
AgB01	6313161	6326712	AgB01_g406_t09	+	1496	8	Coronin-like protein cor-1	SL		N	N	N	19.5	5	16.3	24.1	11.1	100.8	110.9	118.6	44.2	27.4	68.1	68.7	75.4	115.1	37.6	28.5	13.1	9.2	8	11.7	58.3	49.7	26.1	57	28.3
AgB01	6313165	6331932	AgB01_g406_t10	+	2334	11	Coronin-like protein cor-1	SL		N	N	N	16.2	4.2	13.4	18.3	10.1	77.2	87.8	93.9	39.9	25.3	66	68.4	76.4	94.5	33.7	28	14.3	7.4	6.6	9.7	45.7	57.8	23.8	55.1	24.1
AgB01	6331589	6343875	AgB01_g407_t01	-	3594	11	H/ACA ribonucleoprotein complex subunit 4	SL		N	N	N	18.7	1.9	4.2	0	10.8	18.5	12.3	12.2	9.1	4.7	23.7	22.7	30.9	35.6	43.1	66.2	57	62.6	34.9	23.9	18.5	7.7	10.9	6.4	10
AgB01	6331589	6344599	AgB01_g407_t02	-	3619	11	H/ACA ribonucleoprotein complex subunit 4	SL		N	N	N	18.2	1.8	4.1	2.4	10.5	17.9	11.4	11.2	8.4	4.8	23.5	22.6	30.8	35.7	43.3	66.2	56.9	62.4	34.8	23.8	18.4	7.2	10.6	5.6	9.9
AgB01	6331589	6345761	AgB01_g407_t03	-	3623	11	H/ACA ribonucleoprotein complex subunit 4	SL		N	N	Y	18.2	1.8	4	2.4	10.5	17.9	11.4	11.2	8.3	4.8	23.5	22.6	30.7	35.6	43.2	66.1	56.9	62.3	34.8	23.8	18.4	7.2	10.6	5.6	9.9
AgB01	6334307	6343234	AgB01_g407_t04	-	2134	10	H/ACA ribonucleoprotein complex subunit 4	SL		N	Y	N	28.2	2.8	6.3	3.9	17	29.1	17.6	17.1	12.4	7.5	37.8	37.9	51.1	59.3	71.4	110.7	95.3	103.3	58.1	39.8	29.9	13	17	7.6	15.7
AgB01	6334307	6343875	AgB01_g407_t05	-	1865	11	H/ACA ribonucleoprotein complex subunit 4	SL		N	N	N	32.2	3.2	7.2	4.4	19.4	33.3	20.1	19.6	14.1	8.5	43	43.1	58.2	67.3	81.2	126.1	108.6	117.9	66.2	45.3	34	14.8	19.4	8.6	17.8
AgB01	6334307	6344599	AgB01_g407_t06	-	1890	11	H/ACA ribonucleoprotein complex subunit 4	SL		N	N	N	31.8	3.2	7.1	4.4	19.2	32.9	19.9	19.3	13.9	8.7	42.9	42.8	57.9	67.3	81.2	125.5	107.9	116.9	65.7	45.1	33.8	14.6	19.2	8.6	17.8
AgB01	6334307	6345761	AgB01_g407_t07	-	1894	11	H/ACA ribonucleoprotein complex subunit 4	SL		N	N	N	31.7	3.2	7.1	4.4	19.1	32.8	19.8	19.3	13.9	8.7	42.8	42.7	57.8	67.2	81.1	125.2	107.7	116.7	65.6	45	33.8	14.6	19.2	8.6	17.8
AgB01	6346891	6375380	AgB01_g408_t01	-	6668	2	gtp-binding nuclear protein ran	SL	Telo	N	Y	Y	16.2	2.4	8.5	9.5	7.1	18.4	10.6	9.6	6	12.2	46.4	41.6	29.1	33.7	39.5	41.3	43	48.1	54.8	38.9	15.4	21.3	27.2	20.5	17.6
AgB01	6346962	6355224	AgB01_g409_t01	+	5997	4	GTP-binding nuclear protein Ran	SL	Telo	N	Y	N	22.1	3.6	12.4	14.3	10.5	28.7	16.1	14.7	7.6	15.9	58.4	66.3	44	59.4	66.8	64.7	64	69.5	78.7	53	21.1	23.6	35.8	26.9	23.5
AgB01	6346966	6355224	AgB01_g409_t02	+	4121	5	GTP-binding nuclear protein Ran	SL	Telo	N	N	N	53.6	8.4	29.8	34.7	25.3	67.8	38.5	35.3	20.1	42.2	157.4	161.1	109.6	138.9	157.9	158	160.6	174.9	197.9	136.7	53.6	68	92.9	70.7	60.9
AgB01	6347077	6355224	AgB01_g409_t03	+	4417	5	GTP-binding nuclear protein Ran	SL	Telo	N	N	N	50.3	7.9	27.8	32.4	23.7	63.3	36	32.9	18.7	39.4	146.9	150.3	102.2	129.6	147.4	147.5	149.8	163.2	184.6	127.6	50.1	63.4	86.4	65.1	55.7
AgB01	6348648	6355224	AgB01_g409_t04	+	6577	1	gtp-binding nuclear protein ran	SL	Telo	N	N	Y	15.2	2.6	8.2	9.9	7.1	19.4	10.6	9.8	5.6	12.3	48.1	51.1	34.3	46.4	52.8	51.4	50.6	54.8	63.2	42.7	17.1	19.2	28.4	21.2	18.4
AgB01	6354036	6379311	AgB01_g410_t01	-	1982	4	Protein tumorous imaginal disc	SL		N	N	N	8.1	1.7	3	4.9	5.4	5	4.4	3.7	3.1	3.5	6.7	5.2	6.8	7.7	12	11.8	7.5	9.3	7.5	8	5	5.2	8.3	9.2	3.6
AgB01	6354036	6379311	AgB01_g410_t02	-	1820	4	Protein tumorous imaginal disc	SL		N	N	N	3.1	0.8	1.2	1.3	3	2	1.7	1.4	2	1.9	3.4	3.2	2.8	3.5	6.2	5.9	3.7	4.8	3.8	3.8	2.1	1.9	4.5	5.3	2.1
AgB01	6354036	6385122	AgB01_g410_t03	-	2350	8	protein tumorous imaginal	SL		N	N	N	6.5	1.2	2.2	2.3	4	3.8	3.6	3.4	3.9	2.7	9.1	7	6.3	11.3	11.2	9.9	6.3	9.1	8.9	9.3	6.7	5.1	5.1	4.8	2.1
AgB01	6354036	6387821	AgB01_g410_t04	-	3159	10	protein tumorous imaginal	SL		N	Y	N	5.1	1.1	1.6	0.9	2.7	3.2	3.1	2.7	3.5	2.5	8.6	7.2	6.7	11.3	10.4	8.9	6.2	8.8	8.5	9	6.7	3.3	3.8	3.6	1.8
AgB01	6354036	6387821	AgB01_g410_t05	-	3183	10	protein tumorous imaginal	SL		N	N	Y	5.1	1.1	1.6	0.9	2.6	3.1	3.1	2.7	3.5	2.5	8.5	7.1	6.6	11.2	10.4	8.9	6.1	8.8	8.5	9	6.7	3.3	3.8	3.6	1.7
AgB01	6360812	6366254	AgB01_g411_t01	+	402	2	Protein tumorous imaginal disc			N	N	N	10.5	0.7	4	8.4	8.6	7.3	7.1	6.1	2.5	2.4	5.5	4	6	7.4	8.4	10.5	6.7	5.3	6.5	6.2	3.5	4.3	4.8	5	3
AgB01	6363226	6366254	AgB01_g411_t02	+	563	3	Protein tumorous imaginal disc			N	Y	Y	13.9	2.5	5.4	12	7.7	7.5	6.4	6.2	4.9	3.5	7.1	5.7	11.9	10.3	11.4	13.6	12.2	7.3	7.2	8.8	5.6	3.1	6	6.9	3.7
AgB01	6363256	6364140	AgB01_g411_t03	+	245	2	Protein tumorous imaginal disc			N	N	N	21.6	5.4	8.6	16.6	9	12.9	12	10.9	6.8	8.3	8.3	9.2	21.4	17.7	17.3	22.5	18.5	13.5	10.9	13.8	9.8	0	12.2	14	7.4
AgB01	6370203	6397624	AgB01_g412_t01	-	1522	8	f-box domain containing protein	SL	Telo	N	N	N	44.3	112	9	0.1	4.7	0.1	0.1	0	0.5	0.4	3.3	2.6	1.1	4.1	3.3	3.1	1	0.2	0.1	0.1	0.3	0	0.8	0	0.1
AgB01	6388552	6389698	AgB01_g412_t02	-	643	2	f-box domain containing protein			N	N	N	19.4	32.2	2.8	0	1.6	0	0	0	0.5	0.3	1.2	1.1	0.2	1.3	0.9	0.8	0.5	0.2	0	0	0.1	0	0.5	0	0.1
AgB01	6388552	6397613	AgB01_g412_t03	-	1783	8	f-box domain containing protein		Telo	N	N	N	36.8	94.2	7.7	0.1	3.9	0	0.1	0	0.5	0.3	2.7	2.2	0.9	3.3	2.8	2.6	0.9	0.2	0.1	0	0.3	0	0.7	0	0
AgB01	6388552	6397685	AgB01_g412_t04	-	2573	7	f-box domain containing protein		Telo	N	Y	Y	27.1	68	5.9	0.1	2.7	0	0.1	0	0.3	0.3	2.3	1.7	0.6	2.4	2	1.9	0.7	0.1	0.1	0	0.3	0	0.5	0	0
AgB01	6397296	6401615	AgB01_g413_t01	+	1756	3	sperm-specific protein		Telo	N	N	N	25.5	36.7	9.4	0.1	2.9	0.1	0.1	0	0.2	0.2	1.7	1.4	0.5	0.7	1.3	0.6	0.2	0.4	0.3	0.1	0.3	0	0.3	0	0.2
AgB01	6398691	6401615	AgB01_g413_t02	+	1807	3	sperm-specific protein		Telo	N	Y	Y	24.9	35.7	9.3	0.2	2.9	0.1	0.1	0	0.2	0.3	1.4	1.3	0.5	0.7	1.3	0.5	0.2	0.4	0.3	0.1	0.3	0	0.3	0	0.2
AgB01	6398691	6401615	AgB01_g413_t03	+	1775	3	sperm-specific protein		Telo	N	N	N	23.9	33.3	8.9	0.2	3	0.1	0.1	0	0.2	0.3	1.4	1.3	0.5	0.7	1.2	0.5	0.2	0.4	0.3	0.1	0.3	0	0.2	0	0.2
AgB01	6403533	6432041	AgB01_g414_t01	+	7449	10	Developmentally-regulated GTP-binding protein 1, partial	SL		N	Y	N	9.5	5.8	4.4	3.2	4	12.9	12.2	12.3	7.4	4.2	16.4	13.9	9.3	18.4	11.6	11.2	7	6.6	5.7	5.4	8.8	5.1	9.7	5.5	7.1
AgB01	6404671	6419124	AgB01_g414_t02	+	14454	1	Developmentally-regulated GTP-binding protein 1, partial	SL		N	N	Y	4.2	6.6	7.5	0.7	1.1	3	2.4	2.3	1.5	0.7	2.8	2.6	2.1	3.8	3.1	2.8	3.4	5.3	4.7	4.4	6.7	8.7	1.4	1.3	1.2
AgB01	6411721	6432041	AgB01_g414_t03	+	10548	9	Developmentally-regulated GTP-binding protein 1, partial	SL		N	N	N	5.7	4.5	4.4	1.7	2.3	7.2	6.8	7.2	4.4	1.7	7.9	5.2	4.2	8.7	5.7	5.9	3.7	5.1	4.6	4.6	7.4	3.9	5.4	3	3.8
AgB01	6418184	6419124	AgB01_g414_t04	+	671	2	Developmentally-regulated GTP-binding protein 1, partial	SL		N	N	N	24.2	9.2	10.4	11.2	10.9	43.7	37	37.7	24.7	9	46.8	33.3	21.4	52.2	32.9	30.8	11.3	17.5	16.7	16.6	25.2	7.7	16.3	12.2	11.8
AgB01	6421172	6424787	AgB01_g414_t05	+	3616	1	Developmentally-regulated GTP-binding protein 1, partial	SL		N	N	N	3.8	2.1	3.1	0.9	2	3.6	3.6	3.8	1.6	0.8	3.7	2.4	2.9	5.1	3.1	4.7	2	2.5	2.3	2.3	5.2	1.4	3.1	1.4	1.8
AgB01	6425915	6444132	AgB01_g415_t01	-	7466	13	PX domain-containing protein kinase-like protein	SL		N	N	N	3.4	2.7	4.1	2.5	1.9	6.6	3.6	3.9	2.7	2.9	5.2	3.2	2.6	4	2.7	2.5	2	3	2.7	3.4	4.3	3.9	5.6	2.5	4.1
AgB01	6425915	6444164	AgB01_g415_t02	-	7506	13	PX domain-containing protein kinase-like protein	SL		N	N	Y	4.5	4.2	4.8	2.7	2.2	7	4	4.2	3.1	3.4	6.5	4	3	4.8	3.3	3	2.3	3.5	3.1	4	5	4.6	7.1	3.1	5
AgB01	6435318	6444133	AgB01_g415_t03	-	1516	9	PX domain-containing protein kinase-like protein	SL		N	Y	N	9.3	3.9	15	9.9	5.5	28	12.8	14.1	9.1	7	11.8	5.5	4.5	10.6	6	5.7	3.4	7.6	7.8	10.2	11.2	5.7	14.6	6.9	11.1
AgB01	6436435	6444132	AgB01_g415_t04	-	2960	8	PX domain-containing protein kinase-like protein	SL		N	N	N	5.8	2.7	7.4	4.6	2.7	14.2	6.7	7.1	4.5	3.5	6	2.8	2.1	5.2	3.2	3.1	1.9	4.4	4.4	5.6	6.3	4.1	7.4	3.3	5.6
AgB01	6436435	6444132	AgB01_g415_t05	-	1966	9	PX domain-containing protein kinase-like protein	SL		N	N	N	7.7	3.2	10.9	6.8	3.7	21.2	9.6	10.3	6.6	5.3	9	4.1	3.2	7.8	4.6	4.6	2.7	6	6.1	7.8	8.8	5.3	11.1	5	8.4
AgB01	6445599	6452166	AgB01_g416_t01	-	3848	5	Golgin-45			N	Y	Y	5.5	2.4	0.7	0.5	1.2	4.2	3.2	2.9	0.6	1.2	2	2.1	2.1	3	3.9	3.1	1.2	1.7	1.8	1.8	2	0.9	1	0.2	0.3
AgB01	6468254	6488113	AgB01_g417_t01	-	2539	17	hypothetical protein	SL		N	Y	Y	6.7	1	1.7	0.6	2.7	7	6.9	6.7	4.3	0.9	4.3	5.4	8.7	9	8.9	9.5	13.9	12.7	12.1	16.1	11.4	11.6	1.3	0.5	1.1
AgB01	6488602	6502854	AgB01_g418_t01	+	4846	14	Protein disulfide-isomerase 2		Telo	N	N	N	10.5	33.4	2.5	0	1.7	0	0.1	0	0	0.1	0.6	0.4	2	0.2	1.7	2.5	3.7	0.3	0.5	0.5	160.5	3.9	158.8	76.8	0.1
AgB01	6488602	6502854	AgB01_g418_t02	+	3384	15	Protein disulfide-isomerase 2		Telo	N	N	N	14.4	44.4	3.3	0	2.4	0	0.1	0	0	0.2	0.8	0.6	2.9	0.3	2.4	3.6	5.4	0.4	0.8	0.8	229.8	5.6	227.4	109.9	0.1
AgB01	6488602	6502854	AgB01_g418_t03	+	2817	16	Protein disulfide-isomerase 2		Telo	N	Y	N	14.7	48.8	3.9	0	2.8	0	0.1	0.1	0	0.2	1	0.7	3.5	0.4	2.9	4.3	6.5	0.5	0.9	0.9	276	6.8	273.2	132.1	0.1
AgB01	6488602	6502854	AgB01_g418_t04	+	5294	13	Protein disulfide-isomerase 2		Telo	N	N	Y	9.8	31.5	2.4	0	1.5	0	0	0	0	0.1	0.5	0.4	1.8	0.2	1.5	2.3	3.4	0.3	0.5	0.5	146.9	3.6	145.4	70.3	0
AgB01	6488623	6497035	AgB01_g418_t05	+	2258	10	Protein disulfide-isomerase 2		Telo	N	N	N	21.1	65.8	4.9	0.1	0.7	0	0.1	0	0	0	0.1	0	0	0.1	0.2	0.1	0	0.1	0.2	0.1	14.7	0.8	16.9	9.2	0.1
AgB01	6488637	6497035	AgB01_g418_t06	+	2202	10	Protein disulfide-isomerase 2		Telo	N	N	N	20.8	64	4.7	0.1	0.7	0	0	0	0.1	0	0.1	0	0	0.1	0.2	0.1	0	0.1	0.2	0.1	15.1	0.8	17.3	9.4	0.1
AgB01	6502924	6514771	AgB01_g419_t01	-	4703	13	Kelch-like protein 18	SL		N	N	N	14.1	22.5	3.5	4.5	4.6	7.8	6.4	6.6	4.2	3.5	17.6	11.9	10.6	20.8	18.8	14.2	8.3	11.5	8.1	8.7	6.8	4	1.8	1.4	0.4
AgB01	6502924	6514894	AgB01_g419_t02	-	4763	12	Kelch-like protein 18	SL		N	Y	Y	11.5	18	3	3.9	4.1	6.8	5.6	5.7	3.6	3.1	14.7	9.8	9.3	17.7	15.4	11.9	6.6	8.5	6.4	6.8	5.2	2.9	1.4	1.2	0.4
AgB01	6511529	6514318	AgB01_g419_t03	-	633	4	Kelch-like protein 18	SL		N	N	N	18.3	30.8	4.5	7.6	10.2	11.2	11.6	9.4	5.9	8	27.5	17.6	11.6	30	27.8	18	7.6	13.4	8.8	10	7.2	2.7	1.7	1.6	0.5
AgB01	6511529	6514858	AgB01_g419_t04	-	1868	4	Kelch-like protein 18	SL		N	N	N	10.5	21.2	2.3	2.5	3.8	3.8	3.8	3.1	2.6	2.6	9.1	5.8	3.8	10.1	9.4	5.9	2.9	5.9	3.8	3.9	3.1	2.8	0.6	0.5	0.2
AgB01	6504031	6508453	AgB01_g420_t01	+	4423	1	Kelch-like protein 18			N	Y	Y	2.8	4.7	0.5	0.7	0.6	1	0.9	1	0.7	0.5	3.2	2.2	1.4	3.3	3.7	2.6	2	3.5	2.4	2.4	2.1	1.6	0.5	0.3	0.1
AgB01	6515040	6521657	AgB01_g421_t01	+	3186	6	hypothetical protein			N	N	Y	3.8	2.7	5.6	2.3	1.7	4.3	2.6	3.2	4.6	4.7	7.3	7.3	9.3	8.9	4.1	3.5	1.7	1.6	3.2	4.5	9.4	4.9	14.7	12.8	9.3
AgB01	6515040	6521657	AgB01_g421_t02	+	3063	5	hypothetical protein			N	N	N	3.3	2.4	4.9	1.9	1.1	3.9	2.4	2.6	4.4	4.7	7.4	7.3	9.4	8.5	3.9	3.3	1.7	1.5	3.1	4.4	8.6	4	13.6	12.1	8.7
AgB01	6516768	6521657	AgB01_g421_t03	+	1458	7	hypothetical protein			N	Y	N	8.1	5.3	12	5.1	3.6	9.3	5.7	7	10	10.2	16	15.9	20.3	19.2	9	7.5	3.8	3.4	6.9	9.6	19.9	10.7	32.1	28	20.2
AgB01	6524008	6524628	AgB01_g422_t01	+	621	1	hypothetical protein	SL	Telo	N	N	Y	1.3	0.2	0.5	0.1	0	0.3	0	0	0	0.1	0.3	0	0.2	0.4	0.5	0.1	0.2	0.1	0.1	0.2	0.1	0	0.1	0.1	0.6
AgB01	6524136	6528380	AgB01_g422_t02	+	617	5	40S ribosomal protein S12	SL	Telo	N	Y	N	663.8	149.6	259	326.1	216.4	196.2	168.4	157.2	359.3	501.8	221.3	216.2	160.3	141.6	205.6	370.4	547.4	1055.2	985.1	751.5	986.5	644.4	824	303.6	323.8
AgB01	6528611	6534300	AgB01_g423_t01	+	1458	2	Adenosine 3'-phospho 5'-phosphosulfate transporter 2		Telo	N	N	N	6.3	9.7	2.8	1	0.9	3.8	2.4	2.3	1.7	0.6	3.3	2.9	0.4	3.8	2.5	1.4	1.7	3.1	2.5	2	3.2	0	0.4	0.3	0.2
AgB01	6528611	6543666	AgB01_g423_t02	+	4957	8	Adenosine 3'-phospho 5'-phosphosulfate transporter 2		Telo	N	N	N	5.4	7.1	1.2	0	0.3	4.4	2.6	2.7	1.1	2.1	9.3	6.4	4.1	10.1	7.1	7.6	4.1	7.7	6.1	5.2	7.6	5.9	2.8	1.7	0.9
AgB01	6528840	6543666	AgB01_g423_t03	+	4703	8	adenosine 3 -phospho 5 -phosphosulfate transporter 2		Telo	N	N	N	5.5	7	1.2	0.2	0.4	4.5	2.6	2.7	1.1	2.2	9.3	6.5	4.2	10.2	7.2	7.7	4.2	7.8	6.3	5.4	7.7	6.2	2.9	1.8	0.9
AgB01	6528840	6543666	AgB01_g423_t04	+	3763	10	Adenosine 3'-phospho 5'-phosphosulfate transporter 2		Telo	N	N	N	6.3	8	1.4	0.3	0.4	5.5	3.2	3.2	1.3	2.1	9.4	7	4.8	11.1	7.1	7.6	4.9	7.4	6	5.3	7.2	7.4	3.3	2.1	1
AgB01	6531218	6543666	AgB01_g423_t05	+	6582	7	Adenosine 3'-phospho 5'-phosphosulfate transporter 2		Telo	N	Y	Y	4.3	6.3	1	0.2	0.3	3	1.7	1.8	0.7	1.2	5.4	3.6	2.5	6.1	4	4.3	2.6	4.8	3.9	3.2	4.9	3.4	1.4	0.9	0.5
AgB01	6531337	6543666	AgB01_g423_t06	+	4592	8	Adenosine 3'-phospho 5'-phosphosulfate transporter 2		Telo	N	N	N	4.8	6.2	1	0.2	0.3	4.1	2.4	2.5	1	1.5	7.3	4.9	3.2	8.5	5.6	6	3.4	6.4	5	4.2	6.1	4.9	1.8	1.1	0.7
AgB01	6536415	6537131	AgB01_g423_t07	+	717	1	adenosine 3 -phospho 5 -phosphosulfate transporter 2			N	N	N	5.6	8.6	2	0.2	0.3	6.1	3.4	3.3	1.5	0.5	4.5	1.5	0.9	8.1	4.6	5.6	4.6	5.8	4	4.3	5.5	7.2	0.8	0.4	0.8
AgB01	6539794	6549132	AgB01_g424_t01	-	4533	5	Calcipressin-like protein	SL		N	Y	N	6.4	2.3	2.2	1	1.7	8.9	9.3	8.1	1.6	1.4	5.2	4	3.5	6.8	4.3	4.9	3.1	3.5	2.9	2.3	3	1.5	2.6	1.7	0.7
AgB01	6539794	6549268	AgB01_g424_t02	-	6234	4	Calcipressin-like protein	SL		N	N	Y	4.8	1.8	1.6	0.7	1.3	6.5	6.8	5.9	1.1	1	3.9	3	2.7	5.1	3.2	3.6	2.3	2.6	2.2	1.7	2.2	1.1	2	1.3	0.5
AgB01	6539794	6549468	AgB01_g424_t03	-	4561	5	Calcipressin-like protein	SL		N	N	N	9.5	2.9	3.3	1.6	2.6	13.4	14.7	13	2.7	1.7	6.5	5.2	4.6	9.2	5.5	6.1	4.5	4.5	3.5	2.7	3.6	1.5	3.6	2.4	1
AgB01	6539794	6549468	AgB01_g424_t04	-	4328	6	Calcipressin-like protein	SL		N	N	N	10.8	4.5	3.5	1.7	2.6	13.8	15.3	13.4	2.8	2.2	9.7	6.4	5.1	11.3	7.8	8	5.2	7.2	5.3	4.2	6	3.6	4.6	3	1.2
AgB01	6544584	6548218	AgB01_g425_t01	+	2719	2	Calcipressin-like protein	SL		N	Y	Y	5.6	1	2.1	1	2	7.9	9.2	8.4	1.9	0.4	2.2	1.9	1.7	4.1	2	2.3	2.5	2.1	1.5	0.9	1.2	0	1.8	1.2	0.5
AgB01	6564532	6583806	AgB01_g426_t01	+	6224	10	serine threonine-protein kinase			N	Y	Y	1.5	3.8	0.4	0	0.1	0.1	0.1	0.2	0.1	0.1	0.7	0.7	2.1	1.1	0.6	0.5	0.6	0.2	0.3	0.6	5.5	0.3	0.1	0	0.1
AgB01	6568112	6583806	AgB01_g426_t02	+	5905	7	serine threonine-protein kinase			N	N	N	1.6	4.5	0.4	0	0.1	0.1	0.1	0.2	0.1	0.1	0.9	0.7	2.2	1.2	0.7	0.5	0.7	0.3	0.4	0.6	4.4	0	0.1	0	0.1
AgB01	6570105	6583806	AgB01_g426_t03	+	5732	6	Serine/threonine-protein kinase			N	N	N	1.5	3.8	0.3	0	0.1	0.1	0.1	0.2	0.1	0.1	0.9	0.7	2.2	1.2	0.6	0.5	0.7	0.3	0.4	0.6	4	0	0.1	0	0.1
AgB01	6583870	6586021	AgB01_g427_t01	+	2152	1	Ubiquitin-60S ribosomal protein L40, partial	SL		N	N	Y	30.2	5	15.7	19.6	17	29.3	13.2	12	9.2	21	6.5	15.9	24.4	14.6	25.5	34.5	87.8	97.4	125.3	110.9	128.7	34.5	53.8	16.3	23.4
AgB01	6583870	6586021	AgB01_g427_t02	+	1746	2	Polyubiquitin-A, partial	SL		N	N	N	45	7.4	23.9	30.3	26.6	45.4	20.7	18.8	15.2	27	8.2	19.8	31	18.1	32	43.9	112.4	123.1	162	140.2	163.8	41.6	70.3	21.4	30.2
AgB01	6583870	6587618	AgB01_g427_t03	+	2120	3	Ubiquitin-40S ribosomal protein S27a	SL		N	N	N	106.9	15.9	40.3	51.7	64.7	84.2	45.3	43.9	44.8	38.7	12.4	23.3	36.1	27.9	44.7	63.7	156.8	262.4	340.6	265.4	332.8	119.9	158.5	49.4	65.7
AgB01	6583870	6587618	AgB01_g427_t04	+	1714	4	Ubiquitin-40S ribosomal protein S27a	SL		N	Y	N	140.2	20.9	54.4	70.2	85.7	113.5	60.6	58.5	59.3	49.1	15.5	29	45.5	34.6	55.9	80	198.2	327.6	428.9	331.8	417	147.2	200.2	62.6	82.7
AgB01	6588985	6589314	AgB01_g428_t01	-	330	1	hypothetical protein			N	Y	Y	0.7	1.2	0.3	0	0	0.3	0	0	0	0	0	0	0.5	0.2	0	0.3	0.2	0	0	0.1	0.1	0	0.5	0.7	0
AgB01	6597676	6607272	AgB01_g429_t01	-	1610	10	putative tyrosine-protein kinase kin-31			N	N	N	32.9	68.3	5.4	0	1.6	0	0.1	0	0	0.3	0.2	0.3	0.5	0.3	0.2	0.3	0.3	0.1	0	0	0	0	0.2	0	0.1
AgB01	6597676	6607312	AgB01_g429_t02	-	1655	10	putative tyrosine-protein kinase kin-31			N	Y	Y	32	66.5	5.3	0	1.6	0	0.1	0	0	0.3	0.2	0.3	0.4	0.3	0.2	0.2	0.3	0.1	0	0	0	0	0.2	0	0.1
AgB01	6614600	6619218	AgB01_g430_t01	+	2822	4	zinc c2h2 type family protein			N	N	Y	1.2	1	0.1	0	0.3	1	0.4	0.2	0	0	0.1	0	0.2	0	0.1	0	0	0	0	0.1	0.1	0	0	0.1	0
AgB01	6617447	6619218	AgB01_g430_t02	+	927	3	zinc c2h2 type family protein			N	Y	N	1.1	2	0.2	0	0.2	1.7	0.2	0.4	0	0	0	0	0.3	0	0.2	0	0.1	0	0.1	0.2	0.1	0	0	0.3	0
AgB01	6621325	6622943	AgB01_g431_t01	+	569	3	zinc c2h2 type family protein			N	Y	Y	0.8	0.5	0.1	0.2	0	0.8	0.3	0.1	0	0	0	0.1	0	0	0.3	0.1	0	0.1	0	2.5	2.9	0	0	0.2	0
AgB01	6623853	6625004	AgB01_g432_t01	.	1152	1	hypothetical protein			N	Y	Y	0.5	0.5	0	0	0.3	1.3	0.5	0.6	0	0.2	0.1	0	0	0.1	0	0	0.2	0	0.1	3.1	2.1	1.5	0.1	0.1	0
AgB01	6645295	6645623	AgB01_g433_t01	.	329	1	hypothetical protein			N	Y	Y	0.2	0.1	0	0	0.1	0	0	0	0	0	8.7	6.8	1.4	0.7	0	0	0	0.1	0	0	0.3	0	0	0	0
AgB01	6646342	6648473	AgB01_g434_t01	.	2132	1	hypothetical protein			N	Y	Y	1.1	0.2	0	0	0	0	0	0	0.1	0	0.5	0.4	0.3	0.2	0	0	0	0.1	0	0.4	3.8	0	0.1	0	0
AgB01	6652769	6654848	AgB01_g435_t01	.	2080	1	iron-sulfur cluster assembly 1			N	Y	Y	0.6	0.3	0.1	0	0.1	0.4	0.2	0.3	0	0.2	0.3	0	0.1	0.4	0.7	0.4	0.4	1.6	1.3	1.5	1	0.8	1	1.4	0.5
AgB01	6652769	6659892	AgB01_g436_t01	-	2876	7	Iron-sulfur cluster assembly 1			N	Y	Y	4.5	8.3	1.2	0.6	0.7	2.4	2.4	2.2	1.1	1.5	3	4.2	4.8	5.7	3.6	3.3	5.2	4.9	4.3	4.3	3.7	4.2	1.7	1.7	1
AgB01	6661977	6664537	AgB01_g437_t01	-	523	4	Iron-sulfur cluster assembly 1			N	Y	Y	25.3	44.8	7	1.6	6.1	9.3	10.5	11.6	9.9	2.2	5.4	7.3	11.7	18.4	10.1	9.3	10.5	17.3	13.1	13.1	12.9	6.6	2.6	1.3	1.3
AgB01	6675987	6679130	AgB01_g438_t01	-	2017	2	cysteine proteinase			N	Y	Y	0.3	0.3	0.2	0.4	1.3	0.3	0.2	0.2	2.8	4.2	0.2	0.4	0.5	0.1	2.1	2.7	22.7	51.9	11.5	8.8	12.2	23.1	8	10	1.6
AgB01	6680371	6680739	AgB01_g439_t01	.	369	1	hypothetical protein			N	Y	Y	0	0	0	0	0	0	0	0	0	0	0	0	0	0	0.4	0	1	0.8	0.3	0.6	0.2	4.7	0	0	0
AgB01	6681643	6682135	AgB01_g440_t01	.	493	1	hypothetical protein			N	Y	Y	0	0	0	0	0	0	0	0	0	0	0	0	0	0	0	0	0	0.5	0.2	0.4	0.1	0	0	0	0
AgB01	6694086	6705033	AgB01_g441_t01	+	2258	9	hypothetical protein			N	Y	Y	50.7	171.3	16.1	0.9	4.2	0.1	0.1	0	0	0.3	0.4	0.5	0.3	0.3	1.1	0.9	0.8	0.6	0.4	0.2	0.5	0.8	0.8	0.1	0.1
AgB01	6702040	6705033	AgB01_g441_t02	+	1438	3	hypothetical protein			N	N	N	17.3	66.5	7.5	0.1	1.9	0	0.1	0	0	0.3	0.2	0.5	0.5	0.4	0.9	0.8	0.6	0.1	0.1	0.2	0.7	1.2	0.8	0.2	0
AgB01	6708396	6712157	AgB01_g442_t01	+	881	6	cuticlin-1			N	Y	Y	0	0	0.2	0	0	0	0	0	0	0	0	0	0.1	0	0.1	0	0	0	0.2	0	4	0	0	0	0
AgB01	6715794	6720646	AgB01_g443_t01	-	1342	9	Cuticlin-1			N	N	N	1.2	0.2	0	0	1.4	2.4	0.5	0.6	0.5	0.2	0.2	0.2	0	0.1	0.2	0.1	0.2	0.1	0.3	0.2	0.4	0	0	0	0.1
AgB01	6715956	6720646	AgB01_g443_t02	-	1464	9	Cuticlin-1			N	Y	Y	1.8	0.3	0	0	1.8	2.5	0.6	0.5	0.5	0.1	0.1	0.2	0	0.1	0.2	0.1	0.1	0.1	0.3	0.3	0.4	0	0	0	0.1
AgB01	6720539	6742956	AgB01_g444_t01	+	1732	6	hypothetical protein			N	Y	N	1.7	5.5	1.6	0	0.9	0.1	0.1	0.1	0.6	0.5	0	0	0	0.1	0.8	0.8	0.6	4	3.3	1.1	0.8	12	12.9	2.5	51.2
AgB01	6720572	6733186	AgB01_g444_t02	+	1163	2	hypothetical protein			N	N	N	0	0.1	0	0	0.1	0	0	0	0	0.4	0	0	0	0.1	0.3	0.2	0.3	0.5	0.9	0.4	0.1	8.9	4.5	1.1	22.6
AgB01	6731778	6742956	AgB01_g444_t03	+	1945	5	hypothetical protein			N	N	Y	1.5	4.9	1.5	0	0.8	0.1	0.1	0.1	0.6	0.5	0	0	0	0.1	0.8	0.7	0.6	3.6	3	1	0.7	10.7	11.4	2.2	45.6
AgB01	6731869	6742956	AgB01_g444_t04	+	1852	5	hypothetical protein			N	N	N	1.6	5.2	1.5	0	0.8	0.1	0.1	0.1	0.6	0.4	0	0	0	0.1	0.8	0.7	0.6	3.6	3.1	1	0.8	10.3	11.9	2.3	46.3
AgB01	6739966	6740351	AgB01_g444_t05	+	386	1	hypothetical protein			N	N	N	6.5	6.8	1.6	0.4	0.2	2.2	1.1	1.7	1.7	0.4	0.4	0.5	0.5	0.3	0.9	1.7	2	6.1	3.3	2.4	2.7	0	6.2	1	26
AgB01	6749726	6754799	AgB01_g445_t01	-	1798	4	hypothetical protein		Telo	N	Y	Y	4.5	12.6	0.9	0.3	0.2	0.1	0	0.1	0	0	0	0.1	0	0.1	0.1	0	0	0	0	0	0.4	1	0.6	1.2	0.4
AgB01	6749726	6758856	AgB01_g446_t01	+	4086	10	hypothetical protein	SL	Telo	N	N	Y	15.7	31.8	3.5	0.9	0.9	0.4	0.8	0.8	0.2	1.1	3.6	2.5	1.3	3.5	1.5	0.7	0.3	0.1	0	0.1	0.8	0	24.2	7.8	6.1
AgB01	6749726	6758856	AgB01_g446_t02	+	3527	10	hypothetical protein	SL	Telo	N	N	N	21.6	42.2	5.5	1.9	1.6	1.6	2.1	1.9	0.5	2.2	7.4	5.5	3.1	7	3.1	1.6	1	0.6	0.3	0.7	2.4	0.5	44.7	13.8	11
AgB01	6749726	6758856	AgB01_g446_t03	+	3536	10	hypothetical protein	SL	Telo	N	N	N	19.1	39.4	4.7	1.7	1.4	0.9	1.6	1.4	0.5	2.2	7.3	5.3	2.6	6.9	3	1.4	0.6	0.3	0.1	0.1	1.7	0.5	44.5	13.7	11
AgB01	6750090	6752103	AgB01_g446_t04	+	638	3	hypothetical protein		Telo	N	N	N	18	42.8	4.9	0.4	1.1	0.1	0	0	0	0	0	0	0.2	0.2	0.1	0	0	0	0	0	0.3	0	0.9	1.4	0.5
AgB01	6750090	6755777	AgB01_g446_t05	+	1372	8	hypothetical protein		Telo	N	Y	N	37.2	78.3	7.8	0.3	1.5	0.1	0	0	0.2	0.3	0.1	0.1	0.2	0.2	0.1	0	0	0	0	0	0.4	0	1	0.9	0.9
AgB01	6750090	6758856	AgB01_g446_t06	+	3731	10	hypothetical protein	SL	Telo	N	N	N	19.1	39.1	4.7	1.7	1.4	0.8	1.6	1.4	0.5	2.2	7.5	5.2	2.6	6.9	3	1.4	0.5	0.3	0.1	0.1	1.5	0	52.1	16.5	11.9
AgB01	6756231	6758787	AgB01_g447_t01	-	1624	3	hypothetical protein	SL		N	Y	Y	2.3	4.5	1.4	1.7	0.9	0.9	1.6	1.2	0.6	2.2	8.2	5.5	2.8	7	3.1	1.5	0.6	0.3	0.1	0.1	1.5	0	59	18.4	12.2
AgB01	6763269	6763703	AgB01_g448_t01	.	435	1	hypothetical protein			N	Y	Y	0	0.1	0	0	0	0	0	0	0	0	0	0	0.7	0.2	0.2	0.1	0	0.1	0.1	0.6	1.2	0	0.1	0	0
AgB01	6767215	6788712	AgB01_g449_t01	+	6576	17	Casein kinase I isoform delta-A	SL	Telo	N	N	Y	8.5	2.8	1.5	0.8	2.4	10.7	6.2	5.5	1.4	0.8	5.1	5.8	8.1	8.8	16	12.9	14.1	10.9	10.7	11.5	8.2	11.6	1.1	0.5	0.8
AgB01	6767266	6788712	AgB01_g449_t02	+	6001	18	Casein kinase I isoform delta-A	SL	Telo	N	N	N	9.2	3	1.6	0.9	2.5	11.7	6.8	5.9	1.5	0.9	5.6	6.3	8.8	9.5	17.4	13.9	15.2	11.7	11.4	12.4	8.9	12.7	1.3	0.6	0.9
AgB01	6767266	6788712	AgB01_g449_t03	+	5997	18	Casein kinase I isoform delta-A	SL	Telo	N	N	N	9.2	3	1.6	0	2.5	11.7	6.8	5.9	1.5	0.9	5.6	6.3	8.9	9.7	17.5	14.1	15.3	11.8	11.6	12.5	9	12.7	1.3	0.6	0.9
AgB01	6768739	6784468	AgB01_g449_t04	+	2551	15	Casein kinase I isoform delta-A	SL	Telo	N	N	N	19.2	6.1	3.5	1.9	5.8	25.9	15.2	12.9	3.1	1.1	6.5	10.1	15.7	15.4	20.3	20.7	29.4	15	15.6	17.1	11	18.3	1.5	0.8	1.3
AgB01	6768739	6784468	AgB01_g449_t05	+	2500	15	Casein kinase I isoform delta-A	SL	Telo	N	Y	N	18.8	5.9	3.4	1.9	5.6	25.1	14.9	12.7	2.9	1.1	6.6	10.1	15.7	15.5	20	20.5	29.4	14.9	15.4	17	10.7	18.7	1.5	0.8	1.3
AgB01	6768739	6788712	AgB01_g449_t06	+	4860	16	Casein kinase I isoform delta-A	SL	Telo	N	N	N	10.3	3.3	1.8	1	2.8	13	7.6	6.9	1.5	1	6.5	7.3	10.1	10.8	20.3	15.7	17.3	13.4	13.3	14	10.1	15.3	1.5	0.7	1
AgB01	6768739	6788712	AgB01_g449_t07	+	5678	16	Casein kinase I isoform delta-A	SL	Telo	N	N	N	9.4	3.1	1.8	0.9	2.7	12.2	7.1	6.3	1.5	0.9	6	6.7	9.4	10.1	18.5	14.8	16.1	12.5	12.5	13.6	9.6	13.7	1.3	0.6	1
AgB01	6768739	6788712	AgB01_g449_t08	+	5046	17	Casein kinase I isoform delta-A	SL	Telo	N	N	N	10.7	3.5	1.9	1	3	13.8	8	7.1	1.7	0.9	6.3	6.2	8.7	10.6	19.2	15.8	16.2	13.5	13.4	14.3	10.3	15.1	1.5	0.7	1.1
AgB01	6788881	6796020	AgB01_g450_t01	+	3512	5	photosystem i biogenesis protein			N	N	N	3.5	0.4	1.2	0.5	0.8	3.4	2.2	2.4	1.8	2.9	7.3	6	4.2	7.5	7.2	5	3.8	10.7	8.7	9.4	10.9	17.2	19.9	15.6	2.2
AgB01	6788881	6796020	AgB01_g450_t02	+	3142	6	photosystem i biogenesis protein			N	N	N	3.8	0.4	1.2	0.5	0.8	3.7	2.4	2.7	2	3.1	8.1	6.7	4.6	8.1	7.9	5.2	4.2	10.5	8.7	9.5	10.6	17.6	22.2	17.3	2.3
AgB01	6788881	6796020	AgB01_g450_t03	+	3141	6	photosystem i biogenesis protein			N	N	N	2.8	0.3	0.9	0.3	0.5	2.9	1.8	2	1.3	1.9	4.6	4.5	2.7	5.5	5.7	3.6	2.7	7.4	6	6.4	7.1	9.4	11.2	8.9	1.2
AgB01	6788908	6796020	AgB01_g450_t04	+	3678	5	photosystem i biogenesis protein			N	Y	N	2.6	0.3	0.8	0.3	0.4	2.5	1.5	1.7	1.1	1.6	3.8	3.8	2.3	4.7	4.9	3.1	2.3	6.4	5.1	5.6	6.2	8.5	9.5	7.6	1.1
AgB01	6788908	6796020	AgB01_g450_t05	+	4049	4	photosystem i biogenesis protein			N	N	Y	2.4	0.3	0.9	0.3	0.5	2.3	1.4	1.5	1	1.5	3.5	3.4	2.2	4.3	4.6	3.1	2.1	6.8	5.3	5.9	6.9	9	8.7	7	1.1
AgB01	6793563	6800477	AgB01_g451_t01	-	2851	5	photosystem i biogenesis protein	SL		N	Y	N	1.1	0.2	0.5	0.4	0.3	1	0.7	0.8	0.8	1.5	4.1	2.6	2.1	3.1	3	1.9	1.6	5.5	4.8	6.2	5.9	18.2	22	16.3	2.4
AgB01	6793563	6800917	AgB01_g451_t02	-	5953	3	photosystem i biogenesis protein	SL		N	N	Y	0.6	0.1	0.3	0.2	0.2	0.5	0.4	0.4	0.4	0.8	1.9	1.3	1	1.5	1.4	0.9	0.8	3.1	2.6	4	3.3	9.6	10.7	7.9	1.4
AgB01	6793563	6800917	AgB01_g451_t03	-	3257	4	photosystem i biogenesis protein	SL		N	N	N	1	0.2	0.4	0.3	0.3	0.9	0.6	0.7	0.7	1.3	3.5	2.3	1.8	2.7	2.6	1.7	1.4	4.9	4.3	5.6	5.3	16.5	19.1	14.1	2.1
AgB01	6806199	6816181	AgB01_g452_t01	-	6378	10	MSP-domain protein 4		Telo	N	N	N	129.7	503.7	332.2	4.5	47.3	0.4	0.5	0.1	0.9	0.8	0.7	0.8	0.8	0.9	2.3	3	2.3	1.7	1.3	1.2	1.2	0.5	17.9	16.6	1.5
AgB01	6806199	6816181	AgB01_g452_t02	-	6375	10	MSP-domain protein 4		Telo	N	N	N	129.5	500.5	328.8	4.4	47.1	0.4	0.5	0.1	0.9	0.7	0.7	0.8	0.7	0.9	2.3	2.9	2.2	1.7	1.3	1.2	1.2	0.5	17.9	16.6	1.5
AgB01	6806199	6816181	AgB01_g452_t03	-	4659	11	MSP-domain protein 4		Telo	N	N	N	172.1	664.7	439.5	5.8	62.9	0.5	0.6	0.1	1.1	1	0.8	1	0.7	1.2	2.8	3.6	2.7	2.3	1.7	1.6	1.5	0.7	17	13.2	2
AgB01	6806199	6816287	AgB01_g452_t04	-	4780	11	MSP-domain protein 4		Telo	N	N	N	172.5	667.5	438.6	0	62.7	0.5	0.6	0.1	1.2	1	0.9	1	0.9	1.2	2.9	3.8	2.9	2.3	1.7	1.6	1.5	0.7	17	13	2
AgB01	6806199	6816287	AgB01_g452_t05	-	4783	11	MSP-domain protein 4		Telo	N	Y	N	172.8	671.7	443	5.9	63.1	0.5	0.6	0.1	1.2	1.1	0.9	1.1	0.9	1.2	3	4	3	2.3	1.8	1.6	1.5	0.7	17	13	2
AgB01	6806199	6816370	AgB01_g452_t06	-	7017	9	MSP-domain protein 4		Telo	N	N	N	114.6	442	291.9	3.9	41.8	0.3	0.4	0.1	0.7	0.7	0.6	0.7	0.6	0.9	2	2.6	2	1.6	1.2	1.1	1.1	0.5	16.3	15.5	1.4
AgB01	6806199	6816370	AgB01_g452_t07	-	7032	9	MSP-domain protein 4		Telo	N	N	N	117.6	454.2	298.2	4	42.7	0.4	0.4	0.1	0.8	0.7	0.7	0.8	0.7	0.9	2.1	2.8	2.1	1.7	1.2	1.1	1.1	0.5	16.6	15.6	1.4
AgB01	6806199	6816370	AgB01_g452_t08	-	5001	10	MSP-domain protein 4		Telo	N	N	N	165	638.4	419.3	5.7	60	0.5	0.6	0.1	1.1	0.9	0.9	1	0.9	1.3	2.9	3.8	2.9	2.3	1.7	1.5	1.5	0.7	16.2	12.3	1.9
AgB01	6806199	6820215	AgB01_g452_t09	-	10715	9	MSP-domain protein 4		Telo	N	N	Y	77.9	303.9	198.1	2.7	28.2	0.2	0.3	0.1	0.5	0.5	0.5	0.6	0.5	0.7	1.5	1.9	1.4	1.1	0.8	0.7	0.7	0.3	10.8	10	0.9
AgB01	6806199	6820215	AgB01_g452_t10	-	9014	10	MSP-domain protein 4		Telo	N	N	N	92.5	361.1	235.5	3.2	33.5	0.3	0.3	0.1	0.6	0.6	0.6	0.6	0.5	0.8	1.7	2.2	1.7	1.3	0.9	0.8	0.8	0.4	9.2	7.1	1.1
AgB01	6830547	6831336	AgB01_g453_t01	+	790	1	hypothetical protein			N	N	N	3	2.4	0.3	0	0.3	0.2	0.1	0.3	0	0.3	0.8	0.7	0.4	0.5	1.4	1.2	1.3	1.1	1.7	1.2	0.8	0	0.1	0.1	0.7
AgB01	6830940	6844350	AgB01_g453_t02	+	1616	7	Tribbles 2	SL		N	N	N	28.1	16.2	12.5	4.5	5.3	26	11.1	10.7	2.7	4	4.4	6.1	7.7	9.3	25.2	56.2	59.5	47.3	48.4	50	31.5	22.5	6.4	7.8	11.9
AgB01	6830940	6848454	AgB01_g453_t03	+	3755	13	Tribbles 2	SL	Telo	N	N	Y	20.3	12.9	7.9	2.9	3.2	18	7.7	7.2	1.8	6	9.1	8	7.9	9.8	36.6	62.7	61.3	62.2	62.8	69.8	41	56.6	10.2	11.1	14.2
AgB01	6839223	6848454	AgB01_g453_t04	+	3733	11	Tribbles 2	SL	Telo	N	N	N	19.2	13.1	7.5	2.7	2.7	17.3	7.1	6.7	1.8	6.2	9.7	8.4	8.1	10.1	38.2	66.1	60.5	64.8	65.7	73.2	42.7	60.2	10.6	11.5	14.4
AgB01	6839229	6848454	AgB01_g453_t05	+	1715	12	tribbles-like protein 2	SL	Telo	N	Y	N	39	23.2	15.7	5.6	5.6	36.2	14.8	13.8	3.4	6.2	7.7	10.8	12.5	14.3	36.2	82.6	82.8	65.5	67.4	71.5	42.2	47.4	11	12.8	17.1
AgB01	6842541	6848454	AgB01_g453_t06	+	3391	7	Tribbles 2		Telo	N	N	N	12.5	9.3	4.3	1.4	1.5	11	4.3	4.1	1	5.6	9.4	7	5.7	7.8	33.7	54.4	44.6	58.5	58.9	65.5	38.8	62.2	10.1	10.7	13
AgB01	6837722	6838119	AgB01_g454_t01	+	398	1	hypothetical protein			N	Y	Y	3.2	1.5	2	0	0.5	0.9	0.3	0.4	0	0.2	0	0.1	1.7	0.8	0.4	0.2	4.4	1.1	1.3	1.2	1.2	8.7	0	0.1	0.2
AgB01	6848835	6860666	AgB01_g455_t01	-	1797	11	Endoplasmic reticulum-Golgi intermediate compartment protein 3	SL	Telo	N	N	N	26.6	5.6	23.9	0	21.3	32.3	24.4	22.5	29.1	33.2	16.1	21.6	39.1	31.4	32.9	33.7	44.1	43	45.2	35.9	41.3	32.7	35.9	34.6	37
AgB01	6850175	6853509	AgB01_g455_t02	-	2074	3	Endoplasmic reticulum-Golgi intermediate compartment protein 3	SL		N	N	Y	3	0.5	2.1	3.4	2.4	3.4	2.7	2.4	4.2	4.7	3	2.3	2.1	5	5.4	4.4	3.9	9.8	9.9	8	10.6	3.3	9.7	7.8	10.4
AgB01	6850175	6855580	AgB01_g455_t03	-	1730	5	Endoplasmic reticulum-Golgi intermediate compartment protein 3	SL		N	N	N	11.6	2.7	9.7	19.6	10.8	15.5	11.4	10.6	14.9	16.9	9.9	8.5	9.4	20	21.3	19.3	18.9	31.9	32.5	26.2	30.9	13	24.7	25.1	22
AgB01	6850175	6860471	AgB01_g455_t04	-	2022	10	Endoplasmic reticulum-Golgi intermediate compartment protein 3	SL		N	N	N	24.7	4.9	21.5	39.9	19.5	29.1	22.6	20.7	27.2	31.7	15.9	20.6	35.9	30.5	32.2	31.8	40.9	43.3	44.3	36.7	42.7	29.9	35.3	34.8	34.5
AgB01	6850175	6860497	AgB01_g455_t05	-	2060	10	Endoplasmic reticulum-Golgi intermediate compartment protein 3	SL		N	N	N	24.3	4.9	21.1	39.2	19.1	28.6	22.2	20.3	26.7	31.7	16.1	20.6	35.5	30.5	32.1	31.7	40.3	43	44	36.4	42.5	30.2	35	34.5	34.3
AgB01	6851442	6860497	AgB01_g455_t06	-	1550	9	Endoplasmic reticulum-Golgi intermediate compartment protein 3	SL		N	Y	N	24	4.8	21.4	39	17.6	27.2	20.8	19.4	23.8	27	12.1	18.1	36.2	24.3	24.5	25.4	35.1	31.9	32.8	27	31.2	27.9	25.9	24.7	27.8
AgB01	6855638	6860283	AgB01_g455_t07	-	934	4	Endoplasmic reticulum-Golgi intermediate compartment protein 3	SL		N	N	N	30.9	5.5	27.3	46.8	19.8	33	26.4	23.4	29.3	36.5	16.6	28.4	58.2	28.6	30.5	34.6	55.9	40.4	40.3	35.8	40.2	50	30.1	27.9	33.9
AgB01	6850175	6852988	AgB01_g456_t01	+	2814	1	Endoplasmic reticulum-Golgi intermediate compartment protein 3	SL		N	Y	Y	1.6	0.5	1	1.7	1.6	1.6	0.9	1	2.9	4.2	3.1	2.2	1.4	3.3	4	3.5	2.8	8.4	7.9	8	8.9	5.5	5.2	4.9	5.7
AgB01	6853042	6858193	AgB01_g457_t01	+	5152	1	Endoplasmic reticulum-Golgi intermediate compartment protein 3			N	Y	Y	4.8	1	3.8	7	3.3	5.6	4.4	3.5	4	5.6	3	4.5	7.1	5.5	6.4	7.2	10	9.4	10.4	9.4	9.4	6.7	5.6	5.3	6.1
AgB01	6861349	6864500	AgB01_g458_t01	-	741	6	Carrier 2	SL		N	Y	Y	54.5	38.8	32.3	42.9	41.3	71.1	28.6	31.3	38	56.8	95.3	100.2	93.7	140	104.9	128.9	115.7	142	103.7	62.9	48.7	65.3	78.2	72.2	102.5
AgB01	6872356	6878889	AgB01_g459_t01	-	2463	5	hypothetical protein			N	N	N	0.1	0	1.9	0.3	0.6	0	0	0	1.2	1.3	0.5	1.2	1.6	1.6	1.1	1.2	0.4	0.2	0.1	0.3	1.6	2.1	8	1.6	23.5
AgB01	6872356	6903706	AgB01_g459_t02	-	5003	23	hypothetical protein			N	Y	Y	0.1	0.1	7.9	2	1.8	0.1	0.2	0.1	2.6	2.5	0.2	0.6	1.2	0.8	1.8	2.2	1.1	0.2	0.2	0.8	2.3	1.7	12.2	2.3	46.1
AgB01	6874797	6903670	AgB01_g459_t03	-	3895	23	hypothetical protein			N	N	N	0	0.1	9.6	2.5	2.1	0.1	0.2	0.1	2.8	2.8	0.2	0.6	1.5	0.8	2.1	2.5	1.3	0.2	0.2	0.9	2.2	1.8	12	2.3	48.2
AgB01	6908229	6918905	AgB01_g460_t01	+	10677	1	Heterogeneous nuclear ribonucleoprotein Q, partial	SL	Telo	N	N	Y	8.7	1.4	4.7	2.8	2.5	9.8	4.9	5	2	5.6	24.4	20.6	18	16.3	11.5	21.1	18	23	24.7	24.5	14.6	13.3	4.5	3.4	11
AgB01	6908229	6918905	AgB01_g460_t02	+	10091	2	Heterogeneous nuclear ribonucleoprotein Q	SL	Telo	N	Y	N	9.8	1.5	5.1	3	2.7	11	5.5	5.6	2.2	5.8	26	21.7	18.9	17.6	12.3	22.7	19.2	24.6	26.4	26.3	15.6	13.9	4.9	3.6	11.4
AgB01	6908234	6917132	AgB01_g461_t01	-	2705	10	Heterogeneous nuclear ribonucleoprotein Q, partial	SL	Telo	N	Y	N	42.2	7.3	26.5	16.5	14.2	53.1	27.3	28	12.8	21.4	83.5	101.7	105.4	91.2	53.7	112.5	92.1	98.4	111.2	102.9	58.3	74.1	22.6	17.5	52
AgB01	6908234	6917132	AgB01_g461_t02	-	2841	11	Heterogeneous nuclear ribonucleoprotein R	SL	Telo	N	N	N	82.4	13.1	46.9	0	25.4	98.9	50.6	52.1	20.6	41.2	174.8	177.6	173.8	156.5	98.6	202.2	178.9	200.7	220.3	200.7	109.6	117.4	40	30.3	91.6
AgB01	6908234	6918114	AgB01_g461_t03	-	2825	11	Heterogeneous nuclear ribonucleoprotein Q, partial	SL	Telo	N	N	N	69	11.6	41.2	25.5	22.2	85.3	43	44.1	19.3	37.9	162.5	164.2	160.6	141.7	88.2	177	142.6	161.7	177.4	168.2	94.3	112.6	36.8	28.1	82.6
AgB01	6908234	6918114	AgB01_g461_t04	-	2954	12	Heterogeneous nuclear ribonucleoprotein Q, partial	SL	Telo	N	N	N	65.7	11.1	39.2	24.2	21.2	81.2	40.8	42	17.9	35.9	154	155.4	152.5	135	83.9	168.5	135.1	153.7	169.1	159.4	89.5	102.4	34.5	26.4	76.8
AgB01	6908234	6918114	AgB01_g461_t05	-	3090	13	Heterogeneous nuclear ribonucleoprotein R	SL	Telo	N	N	N	75.7	12.1	42.9	26	23.3	90.6	46.3	47.7	18.5	35.5	152.6	154.8	153.8	141.1	88.1	182	160.6	180.5	198.2	179.5	98.3	101.8	35.8	26.7	79.1
AgB01	6908234	6918570	AgB01_g461_t06	-	3417	12	Heterogeneous nuclear ribonucleoprotein R	SL	Telo	N	N	Y	38.8	6.4	23.2	14.3	13	47.5	24.6	25.4	10.6	16.9	68.7	82.4	85.4	77.8	45.4	96.8	79.9	86.7	97.1	89.3	49.9	60.7	18.7	14.2	42.7
AgB01	6908234	6918663	AgB01_g461_t07	-	2601	12	Heterogeneous nuclear ribonucleoprotein R	SL	Telo	N	N	N	89.8	14.4	51.2	31.1	27.7	108	55.3	56.9	22.5	42.9	183.3	186.3	184.6	168.4	105.4	217.3	192.6	215.7	236.5	214.9	117.5	127.6	43.2	32.9	98.9
AgB01	6920769	6927723	AgB01_g462_t01	+	2348	7	hypothetical protein			N	N	N	15.4	35.9	2.7	0.1	1.1	0	0	0	0.1	0.1	2.2	3.2	2.5	5.6	13.4	11.3	4	0.8	0.1	0.5	0.7	0.7	0.4	0	0
AgB01	6920769	6927723	AgB01_g462_t02	+	2405	8	hypothetical protein			N	Y	N	16	37	2.9	0.1	1.1	0	0	0	0.1	0.1	2.2	3.3	2.4	5.5	13.5	11.2	4.1	0.8	0.1	0.5	0.7	0.7	0.4	0	0
AgB01	6920769	6927723	AgB01_g462_t03	+	4961	7	hypothetical protein			N	N	Y	15.5	20.5	1.9	0	0.5	0	0	0	0	0.1	1.5	2.5	2	3.4	7.5	6	2.2	0.5	0.1	0.3	0.6	0.3	0.2	0	0
AgB01	6920769	6927723	AgB01_g462_t04	+	3465	7	hypothetical protein			N	N	N	13.6	26	2.3	0	0.7	0	0	0	0.1	0.1	1.8	2.6	1.9	4	9.9	8.1	2.9	0.6	0.1	0.4	0.6	0.5	0.3	0	0
AgB01	6923389	6927723	AgB01_g462_t05	+	2212	6	hypothetical protein			N	N	N	15.3	34.1	2.5	0.1	1	0	0	0	0.1	0.1	2.4	4.4	3.7	6.5	14.4	11.8	3.7	1	0.1	0.6	0.7	0.8	0.4	0	0
AgB01	6928742	6940141	AgB01_g463_t01	-	3061	11	tau-tubulin kinase 2			N	N	N	11.5	27.1	2.6	0	0.4	0	0	0	0	0	0.2	0.4	0.7	0.8	0.8	0.8	0.3	0.2	0.2	0.1	0.2	0	0.1	0	0
AgB01	6928742	6940155	AgB01_g463_t02	-	3953	11	tau-tubulin kinase 2			N	N	N	8.8	19.8	1.9	0	0.3	0.1	0	0	0	0	0.2	0.5	0.5	0.7	0.7	0.7	0.2	0.2	0.2	0.1	0.1	0	0.1	0	0
AgB01	6928742	6940155	AgB01_g463_t03	-	4142	12	Tau-tubulin kinase 2			N	N	Y	9.2	20.8	2	0	0.3	0.1	0	0	0	0	0.2	0.5	0.6	0.7	0.6	0.7	0.2	0.2	0.2	0.1	0.1	0	0.1	0	0
AgB01	6928742	6940155	AgB01_g463_t04	-	3614	13	Tau-tubulin kinase 2			N	Y	N	10.4	23.8	2.3	0	0.4	0.1	0	0	0	0	0.3	0.6	0.7	0.8	0.7	0.8	0.2	0.2	0.2	0.1	0.2	0	0.1	0	0
AgB01	6941524	6946523	AgB01_g464_t01	+	2635	5	SEC14-like protein 4	SL		N	Y	Y	8.1	1.9	5.8	1.4	2.4	41.2	30.9	35	5.5	7.1	31.2	25.8	19.7	34.7	16.7	11.8	8	13	12.2	11.8	9.9	5.9	3.3	2.5	3
AgB01	6954883	6978162	AgB01_g465_t01	-	2107	6	adp-ribosylation crystallin j1	SL		N	Y	Y	12.5	2.9	1.3	0.4	3	19.4	9.2	9.2	3.3	5.4	26.4	24.4	25.8	29.8	26.4	20.4	11.2	7.6	5.7	9	7.5	3.3	13.7	26.8	19.1
AgB01	7009124	7029831	AgB01_g466_t01	+	1992	4	hypothetical protein			N	Y	Y	1.1	0.4	0.9	0	0.3	0.8	0.5	0.3	2.5	2.1	0.5	0.7	0.6	1.3	13.3	13.5	6.4	2.8	2.6	8.2	12.8	3.5	7.2	10.5	0.2
AgB01	7036792	7055932	AgB01_g467_t01	+	2181	10	Esterase		Telo	N	N	N	18	5.1	4.8	0.1	0.4	7.7	7.5	7	0.5	0.3	1	0.8	0.5	1.3	1.6	1.8	0.6	0	0.1	0.2	0.3	5.5	0	0	0.1
AgB01	7036829	7055932	AgB01_g467_t02	+	2176	10	Esterase		Telo	N	N	N	17.4	5	4.7	0.1	0.4	7.6	7.2	7	0.5	0.3	1	0.8	0.6	1.3	1.6	1.8	0.5	0.1	0.1	0.2	0.3	5.6	0	0	0.1
AgB01	7036877	7055932	AgB01_g467_t03	+	2299	9	Esterase		Telo	N	N	Y	16.9	4.8	4.6	0.1	0.3	7.3	7.1	6.7	0.4	0.3	1	0.8	0.5	1.2	1.5	1.7	0.5	0	0.1	0.2	0.2	5.3	0	0	0.1
AgB01	7036877	7055932	AgB01_g467_t04	+	2132	10	Esterase		Telo	N	N	N	18.2	5.2	4.9	0.1	0.4	7.8	7.6	7.2	0.5	0.3	1	0.9	0.5	1.3	1.6	1.8	0.6	0	0.1	0.2	0.2	5.7	0	0	0.1
AgB01	7044632	7055932	AgB01_g467_t05	+	1950	9	Esterase		Telo	N	Y	N	18.9	5.3	5.4	0.1	0.4	7.9	7.8	7.4	0.6	0.3	1.2	0.9	0.5	1.4	1.6	2	0.6	0	0.1	0.2	0.2	6.2	0	0	0.1
AgB01	7063948	7080562	AgB01_g468_t01	+	2592	14	E3 ubiquitin-protein ligase TRIM13	SL	Telo	N	Y	N	3	0.8	23.8	71.1	54.9	10.8	7.4	8.3	12.9	7.9	15.8	13	9.8	19.5	8.7	10.5	5	5.3	18.6	55.4	26.2	7.3	18.2	4.1	67.9
AgB01	7063971	7067383	AgB01_g468_t02	+	1425	3	hypothetical protein	SL		N	N	N	2.6	0.2	13.8	21.2	17.4	10.9	7.8	6.9	8.4	6.3	15.2	12.6	8.8	17.6	8.9	8.5	4.4	3.6	11.2	33.8	15.2	6.1	8.1	1.6	31.3
AgB01	7063973	7076481	AgB01_g468_t03	+	1825	10	E3 ubiquitin-protein ligase TRIM13	SL	Telo	N	N	N	3.2	0.6	23.6	37.2	31.5	13	8.4	9.4	14	6.7	12.3	12.1	10.4	20.4	8.3	9.5	4.9	4.4	14.9	48.8	22.3	10.4	13.5	3.1	56.9
AgB01	7063973	7080562	AgB01_g468_t04	+	2784	14	E3 ubiquitin-protein ligase TRIM13	SL	Telo	N	N	Y	2.7	0.7	21.9	64.7	50.4	10	6.9	7.7	11.9	7.1	14.4	11.5	9.2	17.8	7.8	9.4	4.6	4.8	16.7	51	23.9	6.8	16.7	3.7	62.5
AgB01	7064010	7069407	AgB01_g468_t05	+	1011	4	hypothetical protein	SL	Telo	N	N	N	9	11.1	29.1	32.1	28.5	14.4	9.8	10.2	11.8	8	14.1	14.3	12.5	21.1	9.7	10.7	4.4	4	13.8	41.5	18.4	8.5	12.2	2.8	46.1
AgB01	7097986	7101081	AgB01_g469_t01	.	3096	1	Homeobox protein ceh-30			N	Y	Y	0	0	0	0	0	0	0	0	0	0.1	0.1	0.2	0.3	0.1	0	0	0	0.5	0.6	2.7	2	1.1	0.1	0	0
AgB01	7097986	7108699	AgB01_g470_t01	-	2494	4	Homeobox protein ceh-30			N	Y	Y	0	0	0	0	0	0	0	0	0.1	0.1	0.3	0.3	0.3	0.2	0.2	0.1	0	1.2	1.2	6.1	4.2	0.7	0.1	0	0
AgB01	7102855	7108812	AgB01_g470_t02	-	2252	2	Homeobox protein ceh-30			N	N	N	0	0	0	0	0	0	0	0	0.1	0	0.1	0.1	0.1	0.2	0.2	0.1	0	0.7	1.1	4.2	3	0	0	0	0
AgB01	7120376	7125204	AgB01_g471_t01	+	3183	3	hypothetical protein			N	N	Y	0.2	0.1	0	0	0.3	0	0	0	0	0	0.2	0.1	0	0	0.2	0.1	0.1	0	0	0.1	0.2	0	4.8	2.9	0
AgB01	7120489	7125204	AgB01_g471_t02	+	2994	3	hypothetical protein			N	Y	N	0.2	0.1	0	0	0.3	0	0	0	0	0	0.2	0.1	0	0.1	0.2	0.1	0.1	0	0	0.1	0.2	0	4.6	3.1	0
AgB01	7120489	7125204	AgB01_g471_t03	+	3007	3	hypothetical protein			N	N	N	0.2	0.1	0	0	0.3	0	0	0	0	0	0.2	0.1	0	0.1	0.2	0.1	0.1	0	0	0.1	0.2	0	4.6	3.1	0
AgB01	7120561	7120906	AgB01_g471_t04	+	346	1	hypothetical protein			N	N	N	1.4	0.3	0	0	0	0	0	0	0	0	0.1	0	0	0	0	0	0.3	0.3	0	0	0.1	0	1.1	0.1	0
AgB01	7122358	7138407	AgB01_g472_t01	-	5542	12	hemicentin-1			N	N	N	2	1	0.3	0	2.9	0.3	0.1	0.1	0	0	0.2	0.3	0.2	0.1	0.4	0.5	0.1	0.1	0	1.1	0.5	0	6.6	7.3	0
AgB01	7122358	7138407	AgB01_g472_t02	-	5209	13	hemicentin-1			N	N	N	2.1	1	0.3	0.2	3.2	0.4	0.1	0.1	0	0	0.2	0.3	0.2	0.1	0.5	0.5	0.1	0.1	0	1	0.5	0	7.1	7.8	0
AgB01	7122358	7138407	AgB01_g472_t03	-	5215	13	hemicentin-1			N	N	N	2.1	1	0.3	0.2	3.2	0.4	0.1	0.1	0	0	0.2	0.3	0.2	0.1	0.5	0.5	0.1	0.1	0	1	0.5	0	7.1	7.8	0
AgB01	7122358	7145693	AgB01_g472_t04	-	5579	19	hemicentin-1			N	N	N	1.8	0.8	0.3	0.3	4	0.4	0.1	0.1	0	0	0.1	0.3	0.2	0.1	0.5	0.4	0.1	0.1	0	1.1	0.4	0	6.1	7.2	0
AgB01	7122358	7149457	AgB01_g472_t05	-	5805	20	hemicentin-1			N	Y	Y	1.7	0.8	0.3	0.3	4.5	0.4	0.1	0.1	0	0	0.1	0.2	0.1	0.1	0.5	0.5	0.1	0.1	0	1.2	0.5	0	6.4	7.7	0
AgB01	7144943	7145693	AgB01_g472_t06	-	308	3	hypothetical protein			N	N	N	0	0	0	0.3	2.9	0	0.1	0	0	0	0	0	0	0	1	0.2	0	0	0	0.5	0.3	0	3.1	3.4	0
AgB01	7156288	7158496	AgB01_g473_t01	+	1561	3	hypothetical protein			N	Y	Y	0	0	0	0	0.2	0.1	0.1	0.1	0	0	0.1	0.2	0.1	0.1	0.5	0.4	0.3	0	0	0.1	0.4	2.2	0.5	0.2	0
AgB01	7166025	7168990	AgB01_g474_t01	+	715	4	homeobox protein ceh-31			N	N	Y	0	0.2	0	0	0.1	0	0	0	0	0	0	0	0	0.2	0.1	0.1	0	0	0	0	0.7	0	0	0	0
AgB01	7166679	7168990	AgB01_g474_t02	+	695	3	homeobox protein ceh-31			N	Y	N	0	0.1	0	0	0.1	0	0	0	0	0	0	0	0	0.2	0.1	0.1	0	0	0	0	0.8	0	0	0	0
AgB01	7174944	7178868	AgB01_g475_t01	+	1108	4	trifunctional enzyme subunit			N	Y	Y	4.7	2.4	4.5	2.7	1.2	27	39.2	32.9	6.7	3.5	10.9	12	13.4	16.7	12.2	18.9	13.3	11.9	13.9	8.7	4.7	3.1	6.8	2.1	12.4
AgB01	7181435	7195756	AgB01_g476_t01	-	5981	12	Trifunctional enzyme subunit alpha	SL		N	Y	Y	13.5	2.7	3.2	1.3	2.4	28.4	24.4	23.3	6.2	6.3	32.8	34.6	41.9	29.9	33.6	34.4	39.6	38.1	43.1	38.6	18.5	25.4	4	1.1	2.8
AgB01	7202720	7227486	AgB01_g477_t01	-	2259	16	zinc finger ccch domain-containing protein 3	SL	Telo	N	Y	Y	55.9	39.9	11.8	7.1	8.2	40	37.1	34.4	11.6	15.9	61.7	88.8	98.4	79	103.5	116.7	148.7	66.9	74.2	63.6	34.2	61.2	11.3	4.6	12.1
AgB01	7222951	7248727	AgB01_g478_t01	+	18562	6	26S proteasome non-ATPase regulatory subunit 9	SL		N	N	Y	4.1	0.8	0.9	0.7	1.1	2.2	2.1	1.9	1.1	1.7	5.6	6.7	5.3	7.1	9.1	11.6	11	13.7	14.7	14.3	8.5	12	2	1	2.5
AgB01	7227223	7248727	AgB01_g478_t02	+	15370	6	26S proteasome non-ATPase regulatory subunit 9	SL		N	Y	N	4.5	0.8	1.1	0.8	1.3	2.3	2.2	1.9	1	1.8	4.7	4.8	4.5	5.4	7.3	10.7	10.4	15.4	16.8	18.3	11.1	14.3	2.2	1.2	2.8
AgB01	7227353	7248727	AgB01_g478_t03	+	15253	6	26S proteasome non-ATPase regulatory subunit 9	SL		N	N	N	4.3	0.8	1.1	0.8	1.2	2.2	2.1	1.8	1	1.7	4.7	4.8	4.6	5.3	7.3	10.7	10.4	15.4	16.8	18.1	11.1	14.5	2.2	1.1	2.8
AgB01	7232507	7246564	AgB01_g479_t01	-	7681	12	Heterogeneous nuclear ribonucleoprotein L, partial	SL		N	N	N	7.7	1.9	2.1	1.2	2.1	4.7	3.4	3.4	1.8	5.7	18.8	19.9	15.5	14.7	31.8	51.6	44.5	64	71.5	72.1	38.1	50.4	6.9	3.7	9.2
AgB01	7232507	7246633	AgB01_g479_t02	-	6674	12	Heterogeneous nuclear ribonucleoprotein L, partial	SL		N	Y	N	5.2	1.3	1.4	0.6	1.3	3.3	2.1	2.1	1.1	4.4	15.1	16.9	13.1	11.1	25.2	41.2	33.6	47	53.2	52.9	25.8	35	4.5	2.4	5.8
AgB01	7232507	7246741	AgB01_g479_t03	-	6892	12	Heterogeneous nuclear ribonucleoprotein L, partial	SL		N	N	N	8.5	2.1	2.3	1.3	2.3	5.2	3.8	3.8	2	6.1	20.8	22	17.1	16.2	34.9	57	48.8	69.5	77.8	76	39.4	55.7	7.6	4	10
AgB01	7232507	7247945	AgB01_g479_t04	-	10314	11	Heterogeneous nuclear ribonucleoprotein L, partial	SL		N	N	Y	3.8	0.9	1	0.5	0.9	2.3	1.5	1.5	0.8	3	9.8	11.2	8.7	7.3	16.6	26.7	22.6	32.1	36.1	38.4	19.6	24.8	3	1.6	3.9
AgB01	7232507	7247945	AgB01_g479_t05	-	7578	12	Heterogeneous nuclear ribonucleoprotein L, partial	SL		N	N	N	7.7	1.9	2.2	1.2	2.1	4.8	3.5	3.5	1.9	5.8	19.2	20.7	15.8	14.8	32.5	52.5	45.2	64.2	72.2	71.4	36.7	50.6	7	3.8	9.2
AgB01	7232507	7247945	AgB01_g479_t06	-	7614	13	Heterogeneous nuclear ribonucleoprotein L, partial	SL		N	N	N	4.6	1.1	1.3	0.6	1.2	2.9	1.9	1.9	1	4	13.4	15.2	11.7	9.8	22.5	36.3	30	41.3	46.9	47	22.6	29.3	4	2.2	5.1
AgB01	7256860	7279097	AgB01_g480_t01	+	6868	16	Nuclear hormone receptor family member nhr-71			N	N	N	3.1	0.8	1.7	1.4	1.5	8	5.7	5.8	1.9	0.6	1.8	1.6	1	1.9	3.8	3.6	3.4	6.4	7	5.6	4.2	2.3	0.6	0.6	0.7
AgB01	7256860	7296606	AgB01_g480_t02	+	5569	18	nuclear hormone receptor family member nhr-71			N	N	N	6	7	2.7	1.8	2	10.2	7.3	7.4	2.5	0.5	1.4	2	1.6	2.4	4.6	4.1	4.4	4.8	5.1	4.5	3.6	2.2	1.4	0.7	0.6
AgB01	7256860	7302107	AgB01_g480_t03	+	6642	20	Nuclear hormone receptor family member nhr-71			N	N	N	4.9	8.6	2.3	1.4	1.7	8.3	5.9	5.9	2	0.5	1.1	1.5	1.4	1.9	3.3	3	3.4	3.9	4	3.6	2.8	2.1	1	0.6	0.4
AgB01	7256860	7302107	AgB01_g480_t04	+	7370	19	Nuclear hormone receptor family member nhr-71			N	N	Y	3.8	4.3	1.9	1.3	1.4	7.5	5.3	5.4	1.8	0.4	1	1.4	1.2	1.6	2.9	2.7	3	3.6	3.8	3.3	2.6	1.6	0.8	0.5	0.4
AgB01	7257011	7279097	AgB01_g480_t05	+	6249	16	Nuclear hormone receptor family member nhr-71			N	N	N	3.2	0.9	1.8	1.5	1.6	8.7	6.2	6.3	2.1	0.7	1.9	1.7	1.1	2	4	3.8	3.7	6.8	7.6	6	4.4	2.5	0.7	0.6	0.8
AgB01	7257011	7291371	AgB01_g480_t06	+	3483	18	Nuclear hormone receptor family member nhr-71			N	N	N	5.9	2.1	3.3	2.7	3	15.6	11.1	11.3	3.8	0.8	1.9	2.7	2.1	3.2	5.3	5.2	6	7.2	7.8	6.6	4.9	3	0.8	0.7	0.8
AgB01	7258230	7307782	AgB01_g480_t07	+	3027	19	Nuclear hormone receptor family member nhr-71			N	N	N	6.4	2.4	3.4	0	3.3	17.9	12.7	12.9	4.3	0.9	2.4	3.2	2.5	3.8	6.2	6.1	6.7	8.2	8.9	7.6	5.6	4	1.3	0.9	0.9
AgB01	7273562	7279097	AgB01_g480_t08	+	4140	2	Nuclear hormone receptor family member nhr-71			N	N	N	0.6	0.9	0.3	0.3	0.3	1.4	1.2	1.2	0.7	0.4	1.3	0.7	0.3	0.9	2.5	2.1	0.9	5.2	5.9	4.3	3.2	1.7	0.6	0.4	0.6
AgB01	7284887	7287736	AgB01_g480_t09	+	2850	1	hypothetical protein			N	Y	N	3.4	9.8	1.2	0	0.5	0.2	0.1	0	0	0	0.2	0.2	0.5	0.3	0.7	0.3	0.2	0.2	0.2	0.1	0.1	0.6	0.3	0	0.1
AgB01	7289082	7291371	AgB01_g480_t10	+	2290	1	hypothetical protein			N	N	N	1.7	3.6	0.7	0	0.4	0.4	0.1	0.1	0.1	0	0.1	0.4	0.6	0.3	0.6	0.2	0.6	0.1	0.1	0.1	0.2	0	0.1	0	0.1
AgB01	7291439	7296606	AgB01_g480_t11	+	5168	1	hypothetical protein			N	N	N	3.8	12.8	1	0	0.4	0.3	0.1	0.1	0	0	0.2	0.4	0.5	0.7	1.7	0.9	0.6	0.3	0.3	0.3	0.4	0.3	0.9	0.2	0.1
AgB01	7299603	7325958	AgB01_g480_t12	+	4624	3	hypothetical protein	SL		N	N	N	3.9	10.8	0.8	0	0.3	0.1	0	0	0	0	0.1	0.1	0.3	0.2	0.5	0.2	0.2	0.1	0.1	0.1	0.2	0.4	0.3	0.2	0
AgB01	7281404	7302087	AgB01_g481_t01	-	4624	10	hypothetical protein			N	N	N	8.1	23.1	2.1	0	0.6	0.3	0.1	0.1	0	0.1	0.3	0.2	0.5	0.3	0.9	0.4	0.4	0.3	0.2	0.2	0.3	0.7	0.5	0.1	0.1
AgB01	7281404	7302107	AgB01_g481_t02	-	6935	8	hypothetical protein			N	N	Y	5.5	16.6	1.5	0	0.4	0.2	0.2	0.1	0	0.1	0.2	0.2	0.4	0.4	0.9	0.4	0.3	0.2	0.3	0.1	0.2	0.7	0.5	0.1	0.1
AgB01	7281404	7325964	AgB01_g481_t03	-	1387	12	hypothetical protein	SL		N	N	N	21.8	52	5.3	0.1	1.4	0.6	0.4	0.3	0	0.1	0.5	0.4	0.8	0.5	1.2	0.5	0.2	0.7	0.3	0.2	0.4	1.2	0.4	0.1	0.1
AgB01	7281920	7324304	AgB01_g481_t04	-	1472	10	hypothetical protein	SL		N	N	N	19.8	48.9	5.4	0	1.3	0.7	0.4	0.3	0	0	0.4	0.4	0.9	0.6	1.1	0.7	0.1	0.7	0.4	0.1	0.3	0	0.5	0.1	0.1
AgB01	7284887	7324304	AgB01_g481_t05	-	2853	10	hypothetical protein	SL		N	Y	N	9.9	24.7	2.6	0.1	0.5	0.3	0.2	0.2	0.1	0.1	0.2	0.4	0.4	0.5	0.6	0.4	0.1	0.3	0.3	0.1	0.2	0	0.3	0.1	0
AgB01	7284887	7325964	AgB01_g481_t06	-	1735	12	hypothetical protein	SL		N	N	N	17.5	41.7	4.3	0.1	1.1	0.5	0.4	0.3	0	0.2	0.4	0.4	0.7	0.6	1.1	0.5	0.1	0.6	0.3	0.2	0.4	1	0.3	0.1	0
AgB01	7291760	7300649	AgB01_g481_t07	-	5424	5	hypothetical protein			N	N	N	5.8	19.4	1.7	0	0.6	0.2	0.1	0.1	0	0	0.3	0.3	0.6	0.5	1.1	0.6	0.5	0.2	0.3	0.2	0.3	1	0.8	0.2	0
AgB01	7291760	7300649	AgB01_g481_t08	-	5248	3	hypothetical protein			N	N	N	4.3	14.5	1.3	0	0.3	0.1	0	0	0	0	0.2	0.1	0.3	0.2	0.6	0.3	0.4	0.1	0.2	0.2	0.2	1	0.6	0.1	0
AgB01	7291760	7325843	AgB01_g481_t09	-	4628	6	hypothetical protein	SL		N	N	N	7.7	18.5	1.8	0	0.6	0.2	0.1	0	0	0	0.2	0.2	0.3	0.3	0.5	0.2	0.3	0.1	0.1	0.1	0.1	0.4	0.2	0.1	0
AgB01	7333662	7344758	AgB01_g482_t01	+	930	2	hypothetical protein			N	N	N	0.2	1.7	0.3	0	0	0	0	0	0	0.1	0	0	0	0.1	0	0	0	0	0	0.7	0.9	1.9	0.2	0	0
AgB01	7333662	7430644	AgB01_g482_t02	+	7700	27	Serine/threonine-protein phosphatase 2A regulatory subunit B'' subunit beta	SL		N	N	Y	1.3	1.8	10.6	0.8	2	2.1	3.4	3.6	7.1	5	8.4	5.7	4	7.1	3.2	2	0.7	0.2	0.5	9.2	17.1	16.2	8.9	21.7	0
AgB01	7333662	7430644	AgB01_g482_t03	+	7700	27	Serine/threonine-protein phosphatase 2A regulatory subunit B'' subunit beta	SL		N	N	N	1.3	1.8	10.6	0.8	2	2.1	3.4	3.6	7.1	5	8.4	5.7	4	7.1	3.2	2	0.7	0.2	0.5	9.2	17.1	16.2	8.9	21.7	0
AgB01	7335231	7344758	AgB01_g482_t04	+	911	2	hypothetical protein			N	N	N	0.4	1.5	0.4	0	0	0	0	0	0	0	0	0	0	0	0	0	0	0	0	0	0	0	0	0	0
AgB01	7349339	7430644	AgB01_g482_t05	+	7176	26	Serine/threonine-protein phosphatase 2A regulatory subunit B'' subunit beta	SL		N	Y	N	1.3	1.7	10.6	0.7	2	2.1	3.4	3.6	7	5.2	9	6	4.3	7.5	3.4	2.1	0.6	0.2	0.5	9.6	17.9	16.9	9.3	22.8	0
AgB01	7349339	7430644	AgB01_g482_t06	+	7176	26	Serine/threonine-protein phosphatase 2A regulatory subunit B'' subunit beta	SL		N	N	N	1.3	1.7	10.6	0.7	2	2.1	3.4	3.6	7	5.2	9	6	4.3	7.5	3.4	2.1	0.6	0.2	0.5	9.6	17.9	16.9	9.3	22.8	0
AgB01	7349358	7350608	AgB01_g482_t07	+	645	2	Serine/threonine-protein phosphatase 2A regulatory subunit B'' subunit beta			N	N	N	1.7	2.2	10.6	3.3	1.5	4.8	11.5	13.5	13.5	9.2	21.1	17.9	7.7	15.3	12.1	5.2	0.4	0.3	0.9	6.7	10.8	16.1	17	27.1	0.2
AgB01	7405316	7430644	AgB01_g482_t08	+	5454	15	Serine/threonine-protein phosphatase 2A regulatory subunit B'' subunit beta	SL		N	N	N	0.5	0.9	2.9	0.2	0.8	0.7	0.8	1	2.6	4	9.4	4.6	3.1	7.1	3	1.6	0.5	0.2	0.6	8.6	19.5	12.4	7.7	19	0
AgB01	7416016	7430644	AgB01_g482_t09	+	4885	16	Serine/threonine-protein phosphatase 2A regulatory subunit B'' subunit beta			N	N	N	0.5	1	3.1	0.2	0.9	0.7	0.8	1.1	2.7	4.2	9.6	4.5	3.1	7	3	1.7	0.6	0.2	0.6	9	19.9	13.4	8.6	21.1	0
AgB01	7340112	7340511	AgB01_g483_t01	.	400	1	hypothetical protein			N	Y	Y	0	1.6	0	0	0.3	0.1	0.1	0.1	0	0	0.3	0	0	0	0	0	0.3	0	0	0	0	0	0	0	0
AgB01	7433994	7442565	AgB01_g484_t01	+	1033	4	e3 ubiquitin-protein ligase rnf19b	SL		N	N	N	13.9	5.1	5.9	8.6	4.7	24.7	10.2	10.5	4.9	3.6	9.2	9.9	11.7	10.4	11.6	7.9	9	10.1	9.8	8.8	3.7	1.7	1.6	2.3	4.3
AgB01	7434071	7476600	AgB01_g484_t02	+	5604	19	E3 ubiquitin-protein ligase RNF19B	SL		N	Y	Y	20.7	8	24	58.5	24.1	68.4	27.9	31	19.5	15.2	26.9	24.5	22.2	19.7	24.3	18.7	18.2	22.4	24.9	32.8	19.9	51.5	16.7	17.7	105.4
AgB01	7443659	7446370	AgB01_g485_t01	+	439	3	spindle- and centromere-associated protein			N	Y	Y	0	0.1	0.2	0	0	0.1	0	0	1.5	0	0.5	0.6	0	0.2	0.2	0.1	0.4	0.3	0	0.2	0.3	0	0	0.4	0.2
AgB01	7476784	7502305	AgB01_g486_t01	+	6640	14	dtw domain-containing protein 1	SL		N	N	Y	19	3.4	3.9	3.4	6	22.9	17.4	15.4	4.7	8	14.4	9.5	7.6	8.6	7	6.3	8.2	16.9	14.9	11.7	9.4	12.5	7.8	9.5	10.9
AgB01	7478818	7502305	AgB01_g486_t02	+	4738	15	dtw domain-containing protein 1	SL		N	Y	N	28.4	5	5.6	5.2	8.6	34.8	27	24	7.1	11.6	20.3	13.5	11	12.5	10.2	9.1	12.8	24.9	21.6	16.9	13.5	18.6	11.6	14.3	15.6
AgB01	7483376	7493873	AgB01_g487_t01	-	8711	2	b-cell receptor-associated protein 31	SL		N	Y	N	6.9	2.5	1.4	0.6	1.3	4.3	2.4	2.2	0.5	2.3	2.9	3.1	3.5	3.4	2.8	3.5	5.5	10.5	10.8	9.9	7.6	6.9	1.3	1.9	5.6
AgB01	7483376	7497243	AgB01_g487_t02	-	13198	2	b-cell receptor-associated protein 31	SL		N	N	Y	6.3	2.4	1.4	0.6	1.2	4.1	2.6	2.4	0.6	1.7	2.1	2.3	2.6	2.5	2.1	2.7	4.4	9.3	9.4	8.1	6.3	5.2	1.1	1.6	4.7
AgB01	7514040	7549543	AgB01_g488_t01	-	1923	15	Twinkle protein, partial	SL		N	Y	N	16.2	9.3	4.8	6.9	6.5	33.7	16.4	17.8	3.5	2.8	4.4	6.3	6.9	10.9	9.1	9.6	10.2	11	11.9	8.1	6.4	11.7	1.2	1.6	1.1
AgB01	7515324	7521530	AgB01_g488_t02	-	4947	5	Twinkle protein			N	N	N	5.3	5.1	1.4	1.5	1.4	6	4.8	4.8	0.8	1.4	3.9	2.5	2.8	4.2	6	4.2	3.9	5.6	5.7	4.2	4.2	8.4	1.2	1.1	0.4
AgB01	7515324	7524069	AgB01_g488_t03	-	4278	5	Twinkle protein			N	N	N	5.9	4.6	1.5	1.9	1.7	7.3	5.9	5.8	0.9	1.4	4.3	2.8	2.8	4.8	6.9	4.6	3.8	5.9	6.3	4.4	4.5	7.7	1.4	1.2	0.4
AgB01	7515324	7549482	AgB01_g488_t04	-	5577	20	Twinkle protein, partial	SL		N	N	N	9.9	6	2.7	3.9	3.5	17.2	10.2	10.6	1.9	2	4.8	4.3	4.4	7.5	8.4	6.8	6.4	8.2	8.8	6.2	5.6	9.9	1.4	1.5	0.7
AgB01	7515324	7549543	AgB01_g488_t05	-	5632	20	Twinkle protein, partial	SL		N	N	Y	9.8	6	2.7	3.8	3.5	17	10.1	10.5	1.9	2	4.8	4.3	4.4	7.5	8.3	6.8	6.4	8.2	8.8	6.1	5.6	9.8	1.4	1.5	0.7
AgB01	7551237	7564528	AgB01_g489_t01	-	3379	10	galactokinase	SL	Telo	N	Y	N	20.3	43.7	16.9	22.4	12.2	22.5	14.2	15.3	14.2	13.8	24.6	17.1	11.8	24.6	21.8	18.5	10.9	16	13.7	12.8	10.8	13.8	11.7	9	10.9
AgB01	7551237	7564859	AgB01_g489_t02	-	6270	9	galactokinase	SL	Telo	N	N	N	11.3	24.4	9.3	12.1	6.6	12.2	7.7	8.3	7.7	7.5	13.3	9.4	6.4	13.3	12	10.2	6.2	8.9	7.7	7.2	6.3	8	6.3	4.9	5.9
AgB01	7551237	7564859	AgB01_g489_t03	-	6321	10	galactokinase	SL	Telo	N	N	Y	11.3	24.5	9.3	12	6.5	12	7.6	8.2	7.6	7.4	13.1	9.1	6.2	13.1	11.8	10	6.1	8.9	7.6	7.1	6.3	7.7	6.2	4.8	5.8
AgB01	7551237	7564859	AgB01_g489_t04	-	5199	10	galactokinase	SL	Telo	N	N	N	13.3	28.9	11.1	14.6	7.9	14.7	9.3	9.9	9.3	9	16	11.1	7.7	16	14.3	12.2	7.3	10.7	9.2	8.6	7.5	9.6	7.6	5.9	7
AgB01	7567526	7625679	AgB01_g490_t01	-	4696	30	tbc (tre-2 bub2 cdc16) domain family member protein		Telo	N	N	N	0.4	0.5	6	18.1	14.3	0.6	0.5	0.7	2.3	1.5	0.4	0.4	0.5	0.7	1.9	1.5	0.6	0.4	0.2	3.3	8.3	9.2	2.3	4.8	0
AgB01	7567526	7634101	AgB01_g490_t02	-	5085	34	tbc (tre-2 bub2 cdc16) domain family member protein	SL	Telo	N	N	N	0.5	0.6	6.3	22.1	16.3	0.7	0.7	0.7	3.1	1.7	0.4	0.4	0.6	0.7	1.9	1.5	0.6	0.5	0.2	3.6	8.5	10.2	2.4	4.8	0
AgB01	7567526	7634101	AgB01_g490_t03	-	5608	34	tbc (tre-2 bub2 cdc16) domain family member protein	SL	Telo	N	N	Y	0.4	0.5	5.8	19.9	14.6	0.7	0.6	0.7	2.9	1.6	0.4	0.3	0.6	0.6	1.7	1.3	0.5	0.4	0.2	3.3	8.2	8.9	2.1	4.3	0
AgB01	7567526	7634101	AgB01_g490_t04	-	5196	35	tbc (tre-2 bub2 cdc16) domain family member protein	SL	Telo	N	N	N	0.4	0.6	6.1	0	15.8	0.7	0.7	0.7	3	1.7	0.4	0.4	0.6	0.7	1.8	1.4	0.6	0.4	0.2	3.4	8.2	9.6	2.3	4.7	0
AgB01	7567526	7634101	AgB01_g490_t05	-	5195	35	tbc (tre-2 bub2 cdc16) domain family member protein	SL	Telo	N	N	N	0.4	0.6	6.1	21.6	15.8	0.7	0.7	0.7	3	1.7	0.4	0.4	0.6	0.7	1.8	1.4	0.6	0.4	0.2	3.5	8.3	9.6	2.3	4.7	0
AgB01	7567526	7634101	AgB01_g490_t06	-	5201	35	tbc (tre-2 bub2 cdc16) domain family member protein	SL	Telo	N	N	N	0.4	0.6	6.1	21.6	15.8	0.7	0.7	0.7	3	1.7	0.4	0.4	0.6	0.7	1.8	1.4	0.6	0.4	0.2	3.4	8.2	9.6	2.3	4.7	0
AgB01	7567526	7634101	AgB01_g490_t07	-	5492	33	tbc (tre-2 bub2 cdc16) domain family member protein	SL	Telo	N	N	N	0.4	0.5	5.9	20.4	15.1	0.7	0.6	0.7	3	1.6	0.4	0.4	0.6	0.6	1.8	1.4	0.6	0.4	0.2	3.4	8.5	9.4	2.2	4.4	0
AgB01	7567526	7634101	AgB01_g490_t08	-	4972	34	tbc (tre-2 bub2 cdc16) domain family member protein	SL	Telo	N	N	N	0.4	0.5	5.6	20.8	15.3	0.7	0.6	0.7	3	1.7	0.4	0.4	0.7	0.7	1.9	1.5	0.6	0.5	0.2	3.4	8.1	9.4	2.3	4.6	0
AgB01	7612868	7634101	AgB01_g490_t09	-	1980	16	TBC1 domain family member 2B, partial	SL		N	Y	N	0.1	0.1	1.8	24	16.4	1	0.5	0.5	3.4	1.6	0.9	0.6	1	0.9	2.6	2.3	0.7	0.6	0.3	1.6	4.4	9.6	2.3	5	0
AgB01	7586936	7609815	AgB01_g491_t01	+	3187	14	Protein scabrous		Telo	N	N	Y	3.8	3.7	58.9	1.2	1.1	5.2	7.2	6.5	3.2	2.2	5.1	2.9	1.3	3.7	2.4	1.8	0.8	0.5	0.5	14.2	5.9	0	1.4	0.8	0
AgB01	7587446	7609815	AgB01_g491_t02	+	3131	13	Protein scabrous		Telo	N	N	N	4	3.6	58.8	1.2	1	5.2	7.3	6.6	3.1	2.2	6	3.4	1.5	4.2	2.6	2.1	1	0.5	0.7	15.8	6.6	0.6	1.5	0.8	0
AgB01	7587447	7609815	AgB01_g491_t03	+	3142	13	Protein scabrous		Telo	N	N	N	4	3.6	59.4	1.2	1	5.3	7.3	6.6	3.1	2.3	5.9	3.4	1.5	4.2	2.6	2.1	1	0.5	0.7	16	6.6	0.6	1.5	0.8	0
AgB01	7587448	7609815	AgB01_g491_t04	+	2663	14	Protein scabrous		Telo	N	N	N	4.6	4.4	69.4	0	1.3	6.1	8.6	7.8	3.8	2.5	6.1	3.4	1.6	4.5	2.8	2.2	0.9	0.6	0.7	16.7	6.8	0	1.6	0.9	0
AgB01	7587454	7609815	AgB01_g491_t05	+	2543	13	Protein scabrous		Telo	N	Y	N	4.7	4.2	69.8	1.3	1.3	6.1	8.8	8.1	3.9	2.4	6.4	3.6	1.7	4.7	3	2.3	1	0.6	0.6	16.8	6.9	0	1.7	0.9	0
AgB01	7594547	7595751	AgB01_g491_t06	+	1205	1	protein scabrous			N	N	N	0.5	1	14.2	0.3	0.3	0.9	1.2	0.8	0.9	0.2	0.2	0.1	0	0.2	1.1	0.6	0	0.1	0.4	6.3	2.3	0	0.4	0.5	0
AgB01	7601068	7601556	AgB01_g491_t07	+	489	1	protein scabrous			N	N	N	1.5	0.5	10.9	0.1	0	0.7	0.9	0.7	0.7	0	0.1	0	0	0.1	0.3	0.2	0	0.5	0	3.8	1.8	0	0.1	0.4	0
AgB01	7604253	7605037	AgB01_g491_t08	+	785	1	Protein scabrous			N	N	N	0.3	0.9	15.5	0.4	0.2	1.6	1.2	1.5	0.6	0.5	0.1	0.3	0	0.6	0.6	0.2	0.3	0	0.1	2.4	2.4	0	0.4	0.1	0
AgB01	7606697	7607353	AgB01_g491_t09	+	657	1	protein scabrous			N	N	N	3.5	1.6	12.7	0.6	0.4	3.4	5.3	6.1	2.5	0.7	6.6	5.8	2.9	5.3	2.9	2.6	1.5	0.3	0.3	3	1.6	0	0.6	0.5	0
AgB01	7693686	7710293	AgB01_g492_t01	+	507	3	Epithelial discoidin domain-containing receptor 1	SL		N	N	N	0.1	0	0	0	0.1	2	3.4	2.4	1.5	4.5	14.8	15.2	9.1	11.4	10.5	6.2	3.6	4.9	17.4	124.3	29.2	6.8	5.6	2.8	14.6
AgB01	7693687	7709874	AgB01_g492_t02	+	405	3	Epithelial discoidin domain-containing receptor 1	SL		N	N	N	0	0	0	0	0.2	2.1	3.7	3	1.9	5.7	18.1	19.4	11.1	14.5	13.2	7.9	4.6	5.9	22	157.1	37.2	8.5	5.7	3.3	13.8
AgB01	7693687	7728751	AgB01_g492_t03	+	4243	17	Epithelial discoidin domain-containing receptor 1	SL		N	Y	Y	0.6	0.2	0	0.1	0.3	5.4	4.5	4.4	2.2	2	6.3	5.2	3.6	6.8	5.7	4.7	2.2	4.9	18	122	35	7.7	4	3.1	6.8
AgB01	7721498	7726443	AgB01_g492_t04	+	1090	7	epithelial discoidin domain-containing receptor 1			N	N	N	0.7	0.1	0	0	0.7	9.9	6.2	7.3	3.4	1.4	6	3.3	3	8.5	4.8	5.2	2	6.5	22	145.9	41.7	7.9	4.7	3.7	7.7
AgB01	7725027	7725380	AgB01_g493_t01	.	354	1	hypothetical protein			N	Y	Y	0.5	0	0	0	0	0	0.5	0	0	0	0.2	0.6	0	0.1	0.4	0.4	0.5	0	1.4	12.4	4.2	4.9	0.2	0.1	0
AgB01	7730020	7735731	AgB01_g494_t01	-	4364	3	Beta-1,3-galactosyltransferase bre-5			N	N	N	4.8	0.9	1.1	1.1	1.2	8.9	10.7	10.1	2	4.7	37.4	34.9	36.4	30.4	21.9	17	10.7	9.3	5.7	3.3	3.4	2.8	4.4	2.8	8.6
AgB01	7730020	7736733	AgB01_g494_t02	-	1392	5	beta- -galactosyltransferase bre-5	SL		N	N	N	13.4	1.9	2.3	0	3.2	24.8	30.5	28.9	5.9	12.8	85.1	83.4	67.1	75.9	43.8	33.1	16.9	16.6	10.1	5.5	6	3.7	9.3	5.4	14.8
AgB01	7730020	7736796	AgB01_g494_t03	-	1597	6	beta- -galactosyltransferase bre-5	SL		N	N	N	13.6	2.2	2.5	3.2	3.4	25.6	32.3	30.3	5.9	11.6	76.4	74.2	60.8	69.8	39.5	30.7	16.1	15.4	9.8	5	5.5	4.3	8.5	4.9	13.7
AgB01	7730020	7736864	AgB01_g494_t04	-	2056	4	beta- -galactosyltransferase bre-5	SL		N	N	N	10.1	1.4	1.7	2.4	2.4	17.2	20.6	19.6	4.3	8.9	58.9	57.1	45.6	52.6	32.2	24.3	12.4	12.5	8.1	4	4.9	2.5	7.2	4.3	11.6
AgB01	7730020	7736864	AgB01_g494_t05	-	5208	3	beta- -galactosyltransferase bre-5	SL		N	N	Y	3	0.5	0.6	0.7	0.7	5.2	6.3	6.1	1.1	2.4	18.2	18.5	15	18.3	11.5	8.9	5.7	5	3	1.5	1.8	2	2.4	1.5	4.7
AgB01	7730020	7741069	AgB01_g494_t06	-	2605	6	Beta-1,3-galactosyltransferase bre-5	SL		N	N	N	9.5	1.5	1.8	2.3	2.6	17	20.6	19.8	4.3	8.1	55.4	58.8	63.1	50.6	29.2	23.8	16.9	11.2	8	4.1	4.5	2.7	6.5	3.9	11.3
AgB01	7730020	7741069	AgB01_g494_t07	-	2072	7	beta- -galactosyltransferase bre-5	SL		N	Y	N	7	1.2	1.5	1.7	2	13.4	17.2	16.4	2.8	5.1	37	40.6	34.1	37.7	18.8	15.3	11.6	7.6	5	2.5	2.6	3.3	4.2	2.5	7.7
AgB01	7730020	7741069	AgB01_g494_t08	-	3619	6	beta- -galactosyltransferase bre-5	SL		N	N	N	6.5	1.2	1.4	1.5	1.8	12.3	15.1	14.4	2.9	6.6	48.1	45.5	47.4	42.2	25.8	20.6	13	10.6	6.4	3.7	3.8	2.4	5.4	3.5	10.1
AgB01	7730020	7735828	AgB01_g495_t01	+	5809	1	Beta-1,3-galactosyltransferase bre-5			N	Y	Y	1.8	0.4	0.4	0.4	0.6	3.2	3.6	3.4	0.9	2.2	14.9	13.1	16.8	11.6	8.8	7.1	4.2	3.8	2.5	1.5	1.5	0.3	1.8	1.1	3.4
AgB01	7742673	7766263	AgB01_g496_t01	-	5300	21	influenza virus ns1a-binding protein	SL		N	Y	N	27.9	8.3	14.5	8.3	12.8	25.3	10	10.3	8.6	6.5	10.4	11	11.6	20.2	41.9	45.2	38.2	51.2	44.3	19.3	10.9	30.3	20.8	25	53.9
AgB01	7742673	7768911	AgB01_g496_t02	-	5851	21	influenza virus ns1a-binding protein	SL		N	N	Y	25.3	7.6	13.2	7.5	11.6	22.9	9	9.4	7.8	5.8	9.5	9.9	10.6	18.4	38	41	34.8	46.5	40.1	17.5	9.9	27.5	18.9	22.7	48.9
AgB01	7774502	7788685	AgB01_g497_t01	+	957	5	hypothetical protein			N	N	Y	0	0	0.6	0.1	0.3	0	0	0	0	0.3	0	0	0	0.1	0.2	0	0	0	0	0.2	0.1	1.8	0.8	0.3	0.4
AgB01	7782021	7788685	AgB01_g497_t02	+	718	4	hypothetical protein			N	Y	N	0	0	0.8	0.1	0.4	0	0	0	0	0.4	0	0	0	0.2	0.2	0.1	0	0	0.1	0.2	0.1	2.4	1.1	0.5	0.5
AgB01	7798896	7807998	AgB01_g498_t01	-	2594	9	hypothetical protein	SL		N	Y	Y	0.2	0.1	0.2	0	0.1	8.8	10.9	10.5	2.6	2.9	12.3	10.8	12.2	15.3	6.7	7	3	0.8	0.4	4	41.6	0	0.8	0.4	0
AgB01	7812634	7818203	AgB01_g499_t01	-	3747	4	hypothetical protein			N	N	N	0.7	3.5	0.1	0	0.1	0.1	0	0	0.1	0.1	0.2	0.1	0.1	0.2	0.5	0.2	0.1	0	0.1	1.5	2.1	0	0.8	0.2	0
AgB01	7812634	7818695	AgB01_g499_t02	-	5255	3	hypothetical protein			N	N	Y	0.7	3.3	0.1	0	0.1	0	0	0	0.1	0.1	0.3	0.1	0.2	0.2	0.4	0.2	0.2	0.3	0.3	1.3	1.7	0.3	0.6	0.2	0.1
AgB01	7816432	7826434	AgB01_g499_t03	-	1538	5	hypothetical protein	SL	Telo	N	N	N	26.3	111.3	65.3	1.1	10.3	0.3	0.9	0.9	1.7	2	14.2	14.8	8.8	9.2	6.6	3.5	1.9	0.5	0	0.1	0.2	1.1	0.9	0	0.3
AgB01	7820051	7824643	AgB01_g499_t04	-	3177	2	hypothetical protein	SL		N	Y	N	12.5	55.5	32.2	0.6	5.2	0.1	0.4	0.4	0.9	1.2	8.5	9	4.8	5.2	3.8	1.9	0.9	0.3	0	0.1	0.1	0.5	0.3	0	0.1
AgB01	7820051	7826434	AgB01_g499_t05	-	3725	3	hypothetical protein	SL	Telo	N	N	N	11.5	50.8	29	0.5	4.7	0.1	0.4	0.4	0.8	0.8	5.9	6	3.7	3.8	2.8	1.5	0.8	0.2	0	0	0.1	0.5	0.4	0	0.1
AgB01	7828190	7843900	AgB01_g500_t01	+	254	2	hypothetical protein	SL		N	N	N	0.1	0	0.5	0.4	0	0.5	3.7	1	0.9	0	3	3.1	1.2	1.3	1	0.6	0.9	0.3	0.2	1.7	148.7	170.1	0.2	0.1	0
AgB01	7841923	7843900	AgB01_g500_t02	+	1978	1	hypothetical protein	SL		N	Y	Y	0	0	0.1	0.1	0	0.1	0.6	0.2	0.3	0.2	0.9	0.6	0.4	0.5	0.2	0.2	0.1	0.1	0.2	0.7	44	41.1	0.1	0	0
AgB01	7842458	7845756	AgB01_g500_t03	+	670	3	hypothetical protein	SL		N	N	N	0.1	0	0.2	0.2	0.1	0.4	2.3	1.5	1	0.6	4.4	3	3.1	2.1	1.7	0.8	0.5	0.3	0.4	2.2	152.9	160	0.3	0.1	0
AgB01	7845137	7845756	AgB01_g500_t04	+	620	1	hypothetical protein			N	N	N	0	0	0	0	0.1	0.2	1	0.7	0	0.3	1.7	2.7	2.2	1.3	1.8	0.5	0.1	0.1	0.3	1.1	18.9	33.5	0.1	0.1	0
AgB01	7847517	7852850	AgB01_g501_t01	+	2988	5	hypothetical protein	SL		N	N	Y	0.3	0	0.4	0.3	0.2	49.1	80.2	70.9	26.8	37.8	66.6	56.5	37.4	56.4	18.7	12.4	3.9	0.8	4.6	4.2	2.8	0	3.8	1.6	0.1
AgB01	7847855	7852850	AgB01_g501_t02	+	2609	5	hypothetical protein	SL		N	N	N	0.4	0	0.4	0.3	0.3	60.5	100.3	93	34.8	48.3	79.7	68.4	46.7	66.6	22.4	14.8	5	1	5.8	5.2	3.3	0	4.6	2	0.1
AgB01	7847855	7852850	AgB01_g501_t03	+	1841	6	hypothetical protein	SL		N	N	N	0.6	0	0.7	0.5	0.4	88.1	142.4	129.6	48.1	62.8	110.9	94.3	64.8	93.4	30.4	20.7	6.7	1.2	5.3	5.2	4.1	0	6.3	2.7	0.1
AgB01	7847908	7852850	AgB01_g501_t04	+	2114	6	hypothetical protein	SL		N	Y	N	0.4	0	0.5	0.4	0.3	69.1	112.7	99.7	37.8	52.9	93.9	79.7	52.6	79.5	26.2	17.6	5.5	1	5	4.8	3.2	0	5.3	2.3	0.1
AgB01	7850154	7851486	AgB01_g502_t01	-	590	2	hypothetical protein			N	Y	Y	0.6	0.1	0.5	0.2	0.2	66.7	100.7	103.4	32.7	39.7	46.3	49.4	48.6	38.7	12	9.7	5.4	0.8	3.4	3.3	2.4	0	3.1	1.7	0.1
AgB01	7854835	7865768	AgB01_g503_t01	+	8760	3	Integral membrane protein 2B	SL		N	Y	Y	0.3	0.5	0.4	3	1.4	0.3	0.2	0.2	2.2	2.9	0.2	0.3	0.5	0.3	0.2	0.2	0.3	1.7	7	13.3	16.4	1.8	1.3	0.1	1.9
AgB01	7854835	7865768	AgB01_g503_t02	+	7596	4	Integral membrane protein 2B	SL		N	N	N	1.6	2.7	1.3	4	2	1	0.6	0.8	2.9	3.4	0.2	0.4	0.6	0.4	0.3	0.3	0.5	1.9	7.7	14.5	18.3	2	1.5	0.1	2.1
AgB01	7854835	7865768	AgB01_g503_t03	+	5593	5	integral membrane protein 2b	SL		N	N	N	1.7	2.8	1.3	5.4	2.6	1.1	0.6	0.8	3.7	4.4	0.3	0.5	0.8	0.5	0.4	0.3	0.5	2.1	8	15.6	20.6	2.5	2	0.1	2.5
AgB01	7854897	7865768	AgB01_g503_t04	+	1718	6	Integral membrane protein 2B	SL		N	N	N	0.7	0.9	1.5	14.9	6.9	1.4	0.7	0.7	10.1	11.3	0.5	0.9	1.5	1	0.7	0.7	0.9	4.4	17.3	35	48.3	3	5.2	0.3	6
AgB01	7862808	7865768	AgB01_g503_t05	+	1424	2	Integral membrane protein 2B			N	N	N	0.4	0.6	0.8	7.3	3.2	0.5	0.3	0.5	4.5	8.2	0.4	0.8	1.4	0.7	0.4	0.3	1	3.3	12.3	25.6	34.4	3.6	4.1	0.2	3.7
AgB01	7865879	7870503	AgB01_g504_t01	-	1842	4	hypothetical protein		Telo	N	N	N	0.3	0.4	0.1	0.1	0	0	0.1	0	2	4.3	0.1	0	0.3	0.3	0.2	0.1	0.1	0	0	0.1	3.8	1.9	0	0	0
AgB01	7865879	7871952	AgB01_g504_t02	-	2170	6	hypothetical protein		Telo	N	Y	Y	0.3	0.4	0.1	0.1	0.1	0	0.1	0	1.8	3.8	0.1	0	0.2	0.3	0.1	0.1	0.1	0	0	0	3.6	1.6	0	0	0
AgB01	7872019	7872404	AgB01_g505_t01	.	386	1	hypothetical protein			N	Y	Y	0	0	0	0	0	0	0	0	0	0	0	0	0	0	0	0	0	0	0	0	1.4	4.5	0	0	0
AgB01	7872642	7873878	AgB01_g506_t01	-	403	2	hypothetical protein			N	Y	Y	0	0	0	0	0	0	0	0	0	0	0	0	0	0	0	0	0	0	0	0	3.5	0	0	0	0
AgB01	7883651	7886267	AgB01_g507_t01	-	465	3	Arylacetamide deacetylase			N	Y	Y	2.6	20.6	3.2	0.4	1.4	0	0	0	0	0	0.2	1.7	0	1.4	1.2	0.4	0	6.2	7.9	9.6	16.1	3.7	1.3	0.5	0.5
AgB01	7891009	7898626	AgB01_g508_t01	+	1493	6	Uncharacterized protein C09G5.8	SL		N	Y	N	0.2	0.1	0	0	0	0	0	0	0	0.1	0.1	0	0.1	0.3	3.3	2.7	0.9	0.2	0.1	0.3	13.7	15.1	0.1	0	0
AgB01	7891009	7898626	AgB01_g508_t02	+	1662	6	Uncharacterized protein C09G5.8	SL		N	N	Y	0.2	0.1	0	0	0	0	0	0	0	0.1	0.1	0	0.1	0.3	3.1	2.5	0.9	0.1	0.1	0.3	12.3	14.6	0.1	0	0
AgB01	7891970	7892861	AgB01_g508_t03	+	892	1	hypothetical protein			N	N	N	0	0	0	0	0	0	0	0	0	0	0	0	0	0.4	1.8	0.4	0.2	0	0	0	6.1	0	0	0	0
AgB01	7892917	7894020	AgB01_g508_t04	+	1104	1	hypothetical protein			N	N	N	0	0	0	0	0	0	0	0	0	0	0	0	0.3	0.1	0.2	0.4	0	0	0	0.1	4	1.6	0	0	0
AgB01	7912791	7918474	AgB01_g509_t01	+	5684	1	Zinc finger protein Gfi-1	SL		N	N	Y	0.3	3.3	0.2	0	0	0	0	0	0	0	0	0	0.1	0.1	0.1	0.1	0.1	0	0.1	1.5	1	0.3	0	0	0
AgB01	7915464	7926248	AgB01_g509_t02	+	3579	5	Zinc finger protein Gfi-1	SL	Telo	N	Y	N	0	0.3	0.1	0.3	0.2	0	0	0	0	0	0.1	0.2	0.1	0.3	0.4	0.3	0.2	0.2	0.4	9.1	7.7	4.3	0.2	0	0
AgB01	7921050	7921517	AgB01_g509_t03	+	468	1	Zinc finger protein Gfi-1			N	N	N	0	0.1	0.1	0.7	0.4	0	0	0	0	0	0.1	0	0	0.2	0.2	0.1	0	0.2	0.8	6	4.7	0	0.1	0	0
AgB01	7922993	7926248	AgB01_g509_t04	+	3256	1	Zinc finger protein Gfi-1		Telo	N	N	N	0	0	0.1	0	0	0	0	0	0	0	0.1	0.1	0	0.2	0.3	0.2	0.1	0.1	0.3	5.9	5.6	2.7	0.2	0	0
AgB01	7935005	7938424	AgB01_g510_t01	-	2194	3	mpv17-like protein		Telo	N	Y	Y	6.7	1.4	2.1	1.9	1.2	7.6	11.4	11.4	1.4	4.2	13.8	9	9.2	10.5	10.3	10.3	5.2	9.6	6.8	4	5.2	4.7	2.9	3	1.6
AgB01	7950944	7970170	AgB01_g511_t01	-	2959	18	hypothetical protein			N	Y	Y	37	18.1	7.8	3.4	7.8	48.1	30	30.5	7.5	2.9	5.3	6.7	8	10.6	12.4	12.3	17.6	21.4	25.4	26.5	17.9	10.5	2.7	2.2	3
AgB01	7950944	7970526	AgB01_g511_t02	-	2917	18	hypothetical protein			N	N	N	37.5	18.3	7.9	3.5	7.9	48.8	30.5	30.9	7.6	2.8	5.4	6.8	8	10.7	12.5	12.4	17.9	21.6	25.6	26.8	18.1	10.7	2.8	2.2	3.1
AgB01	7974814	7997197	AgB01_g512_t01	+	2164	7	arylacetamide deacetylase	SL	Telo	N	N	N	14.6	71.5	10.8	0.5	2.4	0	0	0	0.1	0	0.3	0.9	0.7	1.2	1	0.8	2.4	5.9	7.5	8.9	15.2	0.8	1.2	0.4	0.3
AgB01	7975139	7995064	AgB01_g512_t02	+	842	3	arylacetamide deacetylase	SL	Telo	N	N	N	19.7	100.4	14.8	0.5	3	0.1	0.1	0.1	0.3	0	0.3	0.9	0.8	0.8	0.7	0.8	3.6	5.2	6.3	8.5	12.6	0	1	0.5	0.3
AgB01	7975142	7996174	AgB01_g512_t03	+	1541	6	Arylacetamide deacetylase	SL	Telo	N	N	N	21	100.8	15	0.6	3	0.1	0.1	0	0.1	0	0.3	0.8	0.8	1.4	1.2	1	3.2	6	7.2	9.2	15.2	0	1.3	0.5	0.3
AgB01	7975142	7996174	AgB01_g512_t04	+	1258	7	Arylacetamide deacetylase, partial	SL	Telo	N	N	N	24.2	114.8	16.8	0.8	3.7	0.1	0	0	0.2	0	0.4	1	0.9	1.5	1.2	1	3.8	6.7	8.6	10.6	17.7	0	1.4	0.6	0.4
AgB01	7975142	7996174	AgB01_g512_t05	+	1640	7	Arylacetamide deacetylase	SL	Telo	N	N	N	19.7	94.4	13.7	0.6	2.8	0	0	0	0.1	0	0.3	0.8	0.7	1.3	1.1	1	3	5.5	6.8	8.7	14.2	0	1.2	0.5	0.3
AgB01	7980735	7997197	AgB01_g512_t06	+	2118	10	Arylacetamide deacetylase	SL	Telo	N	N	N	16.1	79.6	12.7	0.5	2.6	0	0	0	0.1	0	0.4	0.9	0.7	1.2	0.9	0.6	2.2	5.6	7.2	8.7	14.4	0.8	1.2	0.5	0.3
AgB01	7980749	7996174	AgB01_g512_t07	+	1292	8	Arylacetamide deacetylase	SL	Telo	N	N	N	24.7	118.2	19	0.7	4	0	0	0	0.2	0	0.4	0.9	0.9	1.3	1	0.8	3	5.8	7.6	9.6	15.3	0	1.2	0.5	0.4
AgB01	7980749	7997197	AgB01_g512_t08	+	2056	9	Arylacetamide deacetylase	SL	Telo	N	N	N	16.8	83.6	13.5	0.6	2.7	0	0	0	0.1	0	0.3	0.9	0.8	1.2	1	0.7	2.1	5.5	7.1	8.7	14.5	0.8	1.3	0.5	0.4
AgB01	7980751	7997197	AgB01_g512_t09	+	2095	10	Arylacetamide deacetylase	SL	Telo	N	N	N	16.1	79.9	12.2	0	2.6	0	0	0	0.1	0	0.3	0.9	0.8	1.2	1	0.6	2.1	5.3	7	8.5	14	0.8	1.2	0.5	0.3
AgB01	7980751	7997197	AgB01_g512_t10	+	2368	11	Arylacetamide deacetylase	SL	Telo	N	N	N	15.3	75.6	11.9	0.5	2.3	0	0	0	0.1	0	0.3	0.8	0.7	1.1	0.9	0.6	2.1	4.9	6.4	7.7	12.6	0.7	1.1	0.4	0.3
AgB01	7980751	7997197	AgB01_g512_t11	+	1868	8	arylacetamide deacetylase	SL	Telo	N	N	N	17.7	87.3	14.3	0.6	3	0.1	0	0	0.1	0	0.3	1	0.8	1.3	1.1	0.7	2.3	6.2	8	9.7	16.2	0.9	1.4	0.5	0.4
AgB01	7980757	7997197	AgB01_g512_t12	+	2323	10	arylacetamide deacetylase	SL	Telo	N	N	N	13.7	67.7	11.2	0.5	2.3	0.1	0	0	0.1	0	0.3	0.9	0.5	0.9	0.8	0.5	1.7	4.7	6.1	7.4	11.9	0.7	1.1	0.4	0.3
AgB01	7986737	7997197	AgB01_g512_t13	+	1909	6	arylacetamide deacetylase	SL		N	N	N	16.6	81.5	12.2	0.6	2.7	0.1	0	0	0.1	0	0.3	1	0.8	1.3	1	0.7	2.2	6	7.9	9.5	15.8	0.9	1.3	0.5	0.4
AgB01	7990394	7996174	AgB01_g512_t14	+	3131	5	Arylacetamide deacetylase			N	Y	Y	8.8	44.7	6	0.2	0.9	0	0	0	0.1	0	0.1	0.2	0.4	0.3	0.2	0.1	1	2.3	2.9	3.3	4.7	0	0.3	0.2	0.1
AgB01	7974817	7987157	AgB01_g513_t01	-	10505	2	Arylacetamide deacetylase, partial		Telo	N	Y	Y	1.4	5.2	1.1	0	0.2	0	0	0	0	0	0	0.1	0	0.1	0.1	0.1	0.6	1.2	1.1	1.2	2.2	0.2	0.1	0	0
AgB01	8002392	8020599	AgB01_g514_t01	+	4531	17	hypothetical protein	SL		N	Y	Y	31.4	12.2	4.4	2.9	8	23.4	20.3	19.1	2.6	2.9	8.8	9	17.4	13.9	22.2	29	58.7	54.7	62.1	82.8	72.4	61	5	1.8	4.4
AgB01	8002587	8020599	AgB01_g514_t02	+	3778	18	hypothetical protein	SL		N	N	N	36.2	14.1	5.1	3.6	8.7	27.6	24.1	22.8	3	3.4	10.5	10.9	20.4	16.4	25.8	32.9	67.5	60.2	68.1	88.5	75	65.9	5.8	2.2	4.7
AgB01	8002587	8020599	AgB01_g514_t03	+	3706	17	hypothetical protein	SL		N	N	N	36.3	14.3	5.1	3.7	8.8	28	24.5	23.1	3.1	3.4	10.7	11	20.8	16.7	26.2	33.5	68.6	61.4	69.8	90.6	76.7	67.2	6	2.2	4.8
AgB01	8003080	8020599	AgB01_g514_t04	+	3730	16	hypothetical protein	SL		N	N	N	33.5	13	4.8	3.3	7.7	25.1	22	20.5	2.8	3.3	10.3	10.6	17.5	15.9	25.6	32	61.2	59.7	67.4	87.8	74.5	64.4	5.8	2.1	4.8
AgB01	8004994	8020599	AgB01_g514_t05	+	4323	16	hypothetical protein			N	N	N	31	13	4.3	2.9	7.9	22.5	18.8	17.7	2.5	2.7	7.3	8	15	12.7	20.4	27.3	53.5	54.7	60.6	81.8	71.3	60	5.1	1.8	4.3
AgB01	8017557	8052238	AgB01_g515_t01	-	6043	18	Multidrug resistance-associated protein 1, partial	SL		N	Y	N	1.4	1	0.4	1.8	1	0.6	0.3	0.3	3	2.3	2	1.6	1.8	1.7	3.8	3.8	1.8	8.3	9.6	13	14.9	10.3	3.1	0.8	17.1
AgB01	8017557	8052238	AgB01_g515_t02	-	6185	19	Multidrug resistance-associated protein 1, partial	SL		N	N	N	1.9	1.1	0.4	1.2	0.8	1	0.5	0.6	2.1	1.9	2.6	1.8	1.8	2.7	5.8	6.3	3.2	16.9	17.1	23.5	24.3	17	3.4	0.9	12.6
AgB01	8025243	8053723	AgB01_g515_t03	-	4236	18	canalicular multispecific organic anion transporter 2			N	N	N	0.8	0.9	0.3	2	1	0	0	0	3.5	2.2	0.3	0.3	0.6	0.4	0.8	0.8	0.3	0.2	0.4	1.6	4.7	1.2	2.6	0.6	18.7
AgB01	8025243	8053723	AgB01_g515_t04	-	4158	17	canalicular multispecific organic anion transporter 2			N	N	N	0.6	0.7	0.3	1.8	0.9	0.1	0	0	3.2	1.4	0.3	0.3	0.5	0.4	0.6	0.6	0.2	0.1	0.4	1.4	4.4	0.8	2.3	0.6	17
AgB01	8025243	8053723	AgB01_g515_t05	-	4546	19	canalicular multispecific organic anion transporter 2			N	N	N	0.7	0.7	0.3	1.8	1	0	0	0	3.3	2.1	0.4	0.3	0.6	0.4	0.6	0.8	0.4	0.2	0.4	1.7	5	1.1	2.7	0.6	19.6
AgB01	8025243	8053723	AgB01_g515_t06	-	4158	17	canalicular multispecific organic anion transporter 2			N	N	N	0.7	0.7	0.3	1.6	1	0	0	0	2.8	1.3	0.3	0.3	0.5	0.4	0.6	0.6	0.2	0.2	0.4	1.4	4.3	1.7	2.3	0.6	17
AgB01	8025243	8053723	AgB01_g515_t07	-	4373	18	canalicular multispecific organic anion transporter 2			N	N	N	0.7	0.6	0.3	1.7	0.9	0.1	0	0	2.6	1.4	0.3	0.3	0.6	0.4	0.6	0.6	0.2	0.1	0.4	1.5	5	0.4	2.4	0.6	18
AgB01	8025243	8053723	AgB01_g515_t08	-	4158	17	canalicular multispecific organic anion transporter 2			N	N	N	0.7	0.8	0.3	1.7	0.9	0	0	0	2.9	1.4	0.2	0.3	0.5	0.4	0.6	0.5	0.2	0.2	0.3	1.5	4.5	1.2	2.2	0.6	16.5
AgB01	8025243	8073327	AgB01_g515_t09	-	6679	34	Canalicular multispecific organic anion transporter 2			N	N	Y	0.8	0.7	0.4	1.9	1	0.1	0	0	3.1	2	0.4	0.3	0.6	0.5	0.9	0.9	0.5	0.3	0.6	2.4	6.7	1.8	3.2	0.8	27.2
AgB01	8025243	8073327	AgB01_g515_t10	-	6679	34	Canalicular multispecific organic anion transporter 2			N	N	N	0.6	0.4	0.2	1.2	0.6	0	0	0	2.2	1.5	0.3	0.2	0.4	0.3	0.6	0.7	0.5	0.2	0.5	1.8	5.1	1.6	2.4	0.6	21.2
AgB01	8025243	8073328	AgB01_g515_t11	-	5990	33	canalicular multispecific organic anion transporter 2			N	N	N	0.6	0.5	0.3	1.4	0.7	0	0	0	2.6	1.5	0.3	0.2	0.3	0.4	0.7	0.7	0.5	0.2	0.5	1.8	5.1	1.7	2.6	0.6	21.3
AgB01	8025243	8073328	AgB01_g515_t12	-	5990	33	canalicular multispecific organic anion transporter 2			N	N	N	0.6	0.5	0.3	1.4	0.6	0	0	0	2.4	1.5	0.3	0.2	0.4	0.4	0.7	0.7	0.4	0.2	0.5	1.8	5.3	1.7	2.5	0.6	21.1
AgB01	8025243	8073360	AgB01_g515_t13	-	6317	35	Canalicular multispecific organic anion transporter 2			N	N	N	0.5	0.5	0.3	1.4	0.7	0	0	0	2.1	1.5	0.3	0.2	0.4	0.3	0.7	0.7	0.4	0.2	0.5	1.9	5.3	1.4	2.5	0.6	21.9
AgB01	8025243	8073360	AgB01_g515_t14	-	6272	35	canalicular multispecific organic anion transporter 2			N	N	N	0.5	0.5	0.3	1.4	0.6	0	0	0	2.3	1.5	0.3	0.2	0.4	0.3	0.7	0.7	0.5	0.2	0.5	1.8	5.3	1.1	2.5	0.6	21.9
AgB01	8025243	8073360	AgB01_g515_t15	-	6637	34	canalicular multispecific organic anion transporter 2			N	N	N	0.6	0.5	0.2	1.3	0.6	0.1	0	0	2.2	1.4	0.2	0.2	0.4	0.3	0.7	0.7	0.5	0.2	0.6	1.9	5.3	1.3	2.5	0.6	21.4
AgB01	8025243	8073360	AgB01_g515_t16	-	6565	33	Canalicular multispecific organic anion transporter 2			N	N	N	0.5	0.4	0.3	1.3	0.6	0	0	0	2.1	1.5	0.3	0.2	0.4	0.3	0.6	0.7	0.4	0.2	0.5	1.9	5.2	1.3	2.3	0.6	20.7
AgB01	8025243	8073360	AgB01_g515_t17	-	6348	32	canalicular multispecific organic anion transporter 2			N	N	N	0.6	0.4	0.3	1.4	0.7	0	0	0	2.2	1.5	0.3	0.2	0.5	0.3	0.6	0.6	0.4	0.2	0.5	1.9	5.4	1.4	2.5	0.6	21.1
AgB01	8025243	8073360	AgB01_g515_t18	-	6102	30	canalicular multispecific organic anion transporter 2			N	N	N	0.6	0.5	0.2	1.2	0.6	0	0	0	1.9	0.9	0.2	0.2	0.4	0.3	0.6	0.7	0.4	0.2	0.5	1.7	4.6	1.4	2.2	0.6	19.3
AgB01	8025243	8073360	AgB01_g515_t19	-	6469	33	canalicular multispecific organic anion transporter 2			N	N	N	0.8	0.8	0.4	2	1	0.1	0	0	3.3	2	0.4	0.3	0.6	0.5	0.9	0.9	0.5	0.3	0.6	2.4	6.8	1.6	3.3	0.8	27.4
AgB01	8027037	8053723	AgB01_g515_t20	-	3464	18	canalicular multispecific organic anion transporter 2			N	N	N	1.2	1	0.5	3.2	1.6	0	0	0	5.3	3.4	0.5	0.5	1	0.7	1.1	1.2	0.5	0.3	0.7	3.1	9	2.5	4.5	1	33.4
AgB01	8027037	8053723	AgB01_g515_t21	-	3464	18	canalicular multispecific organic anion transporter 2			N	N	N	1.2	1	0.5	3.2	1.6	0	0	0	5.3	3.4	0.5	0.5	1	0.7	1.1	1.2	0.5	0.3	0.7	3.1	9	2.5	4.5	1	33.5
AgB01	8050449	8073328	AgB01_g515_t22	-	2369	16	canalicular multispecific organic anion transporter 2			N	N	N	0.4	0	0.2	0	0.1	0.1	0	0	0	0.1	0.2	0.1	0.1	0.1	0.6	0.8	0.7	0.2	0.6	2.1	6.4	0.7	2.4	0.6	25.1
AgB01	8050449	8073328	AgB01_g515_t23	-	2369	16	canalicular multispecific organic anion transporter 2			N	N	N	0.4	0	0.2	0	0.1	0.1	0	0	0	0.1	0.2	0.1	0.1	0.1	0.6	0.8	0.7	0.2	0.6	2.1	6.4	0.7	2.4	0.6	25.1
AgB01	8054525	8073355	AgB01_g515_t24	-	1875	14	Canalicular multispecific organic anion transporter 2			N	N	N	0.3	0	0.1	0	0	0.1	0	0	0	0	0.1	0.1	0.1	0.1	0.7	0.9	0.4	0.3	0.9	2.3	5.7	0.9	2.1	0.6	26.5
AgB01	8054525	8073355	AgB01_g515_t25	-	1875	14	Canalicular multispecific organic anion transporter 2			N	N	N	0.3	0	0.1	0	0	0.1	0	0	0	0	0.1	0.1	0.1	0.1	0.7	0.9	0.4	0.3	0.9	2.3	5.7	0.9	2.2	0.6	26.3
AgB01	8054525	8073355	AgB01_g515_t26	-	1875	14	Canalicular multispecific organic anion transporter 2			N	N	N	0.3	0	0.1	0	0	0.1	0	0	0	0	0.1	0.1	0.1	0.1	0.7	0.9	0.4	0.3	0.9	2.3	5.7	0.9	2.1	0.6	26.3
AgB01	8023265	8024403	AgB01_g516_t01	+	1139	1	28 kDa inner dynein arm light chain, axonemal			N	Y	Y	1.2	0.6	0.3	0.2	0.1	0.9	0.5	0.5	0.6	0.3	1.1	0.6	1.5	1.2	2	2.1	1.1	0.5	0.4	0	1.1	3	0.4	0.1	0.5
AgB01	8074540	8078501	AgB01_g517_t01	-	1284	5	Protein crumb			N	N	N	3.3	2.5	3.2	2.3	1.8	1.1	0.5	0.2	0.1	0.1	1.7	5.1	9.8	8.5	17.2	29.2	23.4	15.7	31.6	82.4	35.8	6.7	8.9	1.4	2.5
AgB01	8074540	8084018	AgB01_g517_t02	-	2155	10	Protein crumb			N	N	N	2.5	2	2.6	0	1.9	0.8	0.3	0.2	0.1	0.1	1.7	3.7	7.3	6.8	14.6	24.9	18.4	13.7	28.3	72.7	32.6	5.6	6.9	1.3	2.1
AgB01	8074540	8099966	AgB01_g517_t03	-	6191	25	crumbs protein			N	N	N	1.2	1.2	1.1	0.8	0.7	0.3	0.2	0.1	0	0	1.5	2.5	4	5.9	13.4	20.9	15.2	12.8	25.6	61	30.7	3.9	4	0.7	0.8
AgB01	8074540	8109279	AgB01_g517_t04	-	6149	30	Protein crumb	SL		N	Y	N	1.2	1.3	1.1	0.8	0.7	0.3	0.2	0.1	0	0	1.7	3.1	4.9	6.6	16.3	24.7	19.2	14.8	28.7	68.4	34.2	4.2	4.2	0.8	0.8
AgB01	8074540	8110013	AgB01_g517_t05	-	6285	31	Protein crumb	SL		N	N	N	1.1	1.2	1.1	0.8	0.7	0.3	0.2	0.1	0	0	1.7	3	4.8	6.6	16.3	24.4	19	14.6	28.7	67.8	33.9	4.1	4.1	0.8	0.8
AgB01	8074540	8110434	AgB01_g517_t06	-	6087	31	crumbs protein	SL		N	N	N	1.2	1.4	1.1	0.8	0.7	0.3	0.1	0.1	0	0	1.7	2.8	4.2	6.4	15.5	23.5	17.2	14.5	28.9	68.3	34.6	4	4.2	0.8	0.8
AgB01	8075556	8109279	AgB01_g517_t07	-	6630	27	Protein crumb	SL		N	N	Y	0.8	1.1	0.9	0.5	0.5	0.2	0.1	0.1	0	0	1.5	2.7	4.1	5.8	14.7	22	16.2	13.3	25.9	61.8	31.1	3.4	3.4	0.6	0.6
AgB01	8095227	8109279	AgB01_g517_t08	-	2341	8	Protein crumb	SL		N	N	N	0	0	0	0	0	0	0	0	0	0	0.8	1.9	2.8	2.8	10.7	14.7	13.6	7.7	13.8	33.9	15.7	3	0.7	0.2	0
AgB01	8102063	8102679	AgB01_g518_t01	.	617	1	Protein crumb			N	Y	Y	0	0	0	0	0	0	0	0	0	0	0	0.1	0.1	0.7	2.5	2.4	1.7	2.1	4.2	7.9	3.5	0	0.2	0	0
AgB01	8118687	8119321	AgB01_g519_t01	.	635	1	hypothetical protein			N	Y	Y	2.2	1.7	0.1	0	0	0	0	0	0	0	0	0	0	0.1	0	0	0	0.1	0	0	0	0	0	0	0
AgB01	8120266	8136179	AgB01_g520_t01	-	12997	4	hypothetical protein			N	Y	Y	0.9	0.6	0.3	0.2	0.6	0.5	0.4	0.4	0.3	0.5	0.9	0.6	0.4	0.5	1.2	1.5	2.3	6.4	7.3	7.1	4.7	3.2	0.7	0.3	0.5
AgB01	8120266	8136179	AgB01_g520_t02	-	12937	3	hypothetical protein			N	N	N	1.4	0.8	0.5	0.4	0.8	1	0.8	0.8	0.7	1.1	1.8	1.5	0.8	1.2	2.1	2.1	3.3	9.4	10.5	9.8	6.3	4	1.2	0.4	0.7
AgB01	8133721	8136179	AgB01_g520_t03	-	604	3	hypothetical protein			N	N	N	1.3	0.2	0	0.3	0	0.7	0.4	0.3	0	2.3	0.1	0	0.4	0.1	1.5	0.9	0.4	0.6	1	0.4	1.9	2.9	2.1	1.1	0.1
AgB01	8123952	8133406	AgB01_g521_t01	+	3562	6	hypothetical protein			N	Y	N	2.2	0.5	0.7	0.8	0.9	2.4	2	1.6	1.4	3.4	5.8	5.4	2.4	4.7	4.1	2.8	3.1	12.2	13	11	7.6	2.9	1.5	0.6	0.7
AgB01	8123969	8133406	AgB01_g521_t02	+	4206	6	Protein cereblon			N	N	Y	2.3	0.6	0.7	0.7	1	2.2	1.9	1.6	1.2	3.1	5.5	5	2	4.1	4.1	2.7	3.7	12.4	13	10.7	7.3	2.9	1.7	0.6	0.7
AgB01	8140384	8142357	AgB01_g522_t01	-	1974	1	hypothetical protein			N	N	N	1.4	0.3	0	0.3	0.3	3.9	5.9	6.1	5.8	4.5	27.1	14.8	6.6	17.9	6.8	3.9	2	1.6	2.4	7.4	20.2	0	4.7	1.2	0.1
AgB01	8140384	8143582	AgB01_g522_t02	-	1920	2	hypothetical protein			N	N	N	0.9	0.2	0.1	0.3	0.3	2.7	4.4	4.5	3.3	3.6	16.1	11.7	3.2	13	5.3	3.5	1.8	1.8	3.3	12.9	17.8	0	2.5	0.6	0
AgB01	8140384	8146135	AgB01_g522_t03	-	3161	3	hypothetical protein			N	Y	Y	0.5	0.1	0	0.2	0.2	1.7	2.7	2.7	2	2.4	10	7.4	1.9	8.1	3.4	2.2	1.3	1.5	2.4	8.9	11.7	0	1.6	0.4	0
AgB01	8140384	8146135	AgB01_g522_t04	-	3049	3	hypothetical protein			N	N	N	0.6	0.1	0	0.2	0.2	1.7	2.8	2.8	2.1	2.3	10.2	7.4	2	8.2	3.3	2.2	1.3	1.4	2.3	7.7	10.9	0	1.6	0.4	0
AgB01	8147416	8152350	AgB01_g523_t01	-	766	5	Uncharacterized protein K12H4.5	SL	Telo	N	N	N	123.2	55.4	23.8	33.8	43	74.6	63.4	57.6	66.4	71.6	210.4	375.4	235.3	157.4	136.7	102.9	120.5	69.1	56.9	37.2	58.3	45.1	94.9	110.9	76
AgB01	8147416	8152397	AgB01_g523_t02	-	821	5	Uncharacterized protein K12H4.5	SL	Telo	N	N	N	115	51.8	22.2	31.5	40.2	69.7	59.1	53.9	62	65.3	193.5	340.7	216.1	144	124.6	94.2	111.1	63.2	52	34	53.8	42.1	90.6	103.8	71.6
AgB01	8147416	8153422	AgB01_g523_t03	-	872	6	Uncharacterized protein K12H4.5	SL	Telo	N	N	Y	108.5	48.8	21	29.6	37.8	65.7	55.8	50.9	58.2	62	183.7	325	204.6	136.7	117.9	89.3	105	60.2	49.3	32.3	50.9	39.6	85	98	68.1
AgB01	8147416	8154762	AgB01_g523_t04	-	792	5	Uncharacterized protein K12H4.5	SL	Telo	N	Y	N	119.5	53.7	23.1	32.8	41.7	73	62.3	56.3	64.4	70.3	207	365.1	229.9	154.5	133.1	100.2	116.9	67.2	55.1	36	56.4	43.7	92.7	110.5	79.3
AgB01	8161845	8176823	AgB01_g524_t01	+	4669	11	Oxysterol-binding protein-related protein 1	SL		N	N	Y	11.6	8.7	4.3	4.2	2.1	13.6	13.9	14	4.8	5.1	20.5	15.1	9.7	17.9	15.6	17	11.5	15.1	16.3	15	15.1	23.3	15.2	3.5	17.8
AgB01	8161958	8176823	AgB01_g524_t02	+	3155	12	Oxysterol-binding protein-related protein 1	SL		N	N	N	16.3	11.6	6	6.2	3.1	20.1	20.6	20.7	7	7.6	30.2	22.2	14.4	26.3	23	25	17.1	22.4	24.2	22	22.3	34.5	22.5	5.2	26.2
AgB01	8162128	8176823	AgB01_g524_t03	+	2978	12	Oxysterol-binding protein-related protein 1	SL		N	N	N	17.2	12.2	6.3	6.5	3.3	21.2	21.8	21.8	7.4	7.9	31.5	22.9	14.8	26.9	23.9	25.7	17.4	23.3	25.4	23.1	23.2	37.2	23.5	5.4	27.4
AgB01	8163361	8176823	AgB01_g524_t04	+	3132	11	Oxysterol-binding protein-related protein 1	SL		N	Y	N	15.5	11.2	5.7	5.9	2.9	19	19.4	19.5	6.8	7.5	30	22.1	14.3	26	22.9	24.8	16.7	22.2	23.8	21.9	21.9	34.8	22.3	5.1	25.8
AgB01	8178543	8191823	AgB01_g525_t01	+	8821	5	Protein CutA	SL		N	N	Y	32.8	10.4	10.2	19.1	11.8	20.2	11.9	11.5	13.4	10.3	11.7	9.7	8.5	7.8	7.8	7.4	7.2	15.7	20.3	11.9	12.4	14.1	21.9	11.8	15.9
AgB01	8179214	8181849	AgB01_g525_t02	+	874	2	Protein CutA	SL		N	Y	N	109.4	9.4	39.4	98.8	49.9	79.5	45	41.2	48.7	62.3	43.5	34.7	27.8	15.5	17	22	25.2	89.5	115.3	61	57.6	98.9	123.1	69.9	93.7
AgB01	8179781	8191823	AgB01_g525_t03	+	8551	4	Signal transducing adapter molecule 1			N	N	N	25.3	10	7.2	11.5	8.1	14.3	8.5	8.5	10.1	5.1	8.2	7.1	6.5	6.8	6.5	5.8	5.3	8.4	10.5	7	7.6	5.1	10.4	5.6	7.6
AgB01	8181138	8198097	AgB01_g526_t01	-	7788	9	Signal transducing adapter molecule 1			N	N	Y	26	18.5	7	7.7	6	15.5	9.6	9.3	6.4	6.4	13.8	16.4	17	13.8	10.9	9.9	9.3	8.7	11.6	9.3	9.2	8.4	9.5	5.4	6.9
AgB01	8181138	8198097	AgB01_g526_t02	-	6906	10	Signal transducing adapter molecule 1			N	N	N	55.5	34	15.3	19.5	13.8	32.2	19.9	19.5	16.1	10.8	19.4	23.3	25.5	20	15.3	14.4	15.5	15.6	20.2	15	14.8	14	18.7	10.6	14.5
AgB01	8181138	8198097	AgB01_g526_t03	-	7217	10	Signal transducing adapter molecule 1			N	N	N	53.8	33.3	14.7	18.7	13.3	30.9	19.1	18.7	15.7	10.3	19.1	22.4	24.5	19.2	15.2	14.2	15	15.1	19.9	14.8	14.7	13.7	18.5	10.4	14.1
AgB01	8181138	8199816	AgB01_g526_t04	-	5852	10	Signal transducing adapter molecule 1	SL		N	Y	N	58.7	37.7	17	20.4	15	35.8	22.3	21.8	17.7	13.3	28.8	30.2	30.3	27.3	22.9	20.1	17.4	18.1	24.2	18.2	19.1	16.5	23.3	13.3	17.1
AgB01	8181138	8199821	AgB01_g526_t05	-	5639	9	Signal transducing adapter molecule 1	SL		N	N	N	34.3	25.7	10.1	10.7	8.2	21.5	13.3	13	9	8.5	18.3	22.1	23	18	14.4	13.2	11.7	11.2	14.9	11.9	11.6	10.7	13.6	7.8	10.1
AgB01	8193175	8203739	AgB01_g527_t01	+	7819	3	Signal transducing adapter molecule 1	SL		N	N	Y	9.9	6.9	1.5	0.7	0.9	12.5	7.8	7.9	2	4.4	24.9	20.2	20.7	19.5	10.9	8.3	4.5	6	5.6	6.1	4.7	6.2	2.3	1	1.3
AgB01	8193175	8209623	AgB01_g527_t02	+	7378	9	Signal transducing adapter molecule 1	SL		N	N	N	37.4	12.5	8.1	12.2	9.8	44.4	57.2	51.4	9.9	8.6	37.7	31.9	36.4	27.4	17.5	16.9	22.5	16.4	16.3	12	8.4	14.1	9.2	5	7.3
AgB01	8198745	8199808	AgB01_g527_t03	+	1064	1	hypothetical protein	SL		N	N	N	22.4	16.2	2.3	0.6	0.6	11.2	9.6	6.3	2	3.3	24	30.2	22.3	20.9	8.5	5.8	2.3	3.3	2.9	2.9	1.9	0	1.8	0.8	0.7
AgB01	8204158	8209623	AgB01_g527_t04	+	1123	6	hypothetical protein	SL		N	Y	N	159.7	11.2	39.1	73.4	56.8	211	325.4	287	53.1	34.1	135.2	92.2	116.7	79.3	60.4	69	119.4	75	76.4	40.6	23.6	57	47.5	25.4	36.7
AgB01	8204219	8209623	AgB01_g527_t05	+	1598	5	hypothetical protein	SL		N	N	N	111.3	7.8	27.4	50.9	39.8	146.3	225.5	198.6	37	22.1	90.5	62	81	54.2	41.3	47.7	83.5	52.2	54.5	29.5	17.6	36.8	31.5	16.4	24.1
AgB01	8205473	8208546	AgB01_g527_t06	+	3074	1	hypothetical protein			N	N	N	26.7	1.6	6.2	11	9	34.8	53.4	46.6	8.9	4.2	15	16.2	21.6	15.7	10	12.8	18.3	12.1	10.3	7.6	4.3	3.4	5.2	2.2	3.6
AgB01	8210966	8211629	AgB01_g528_t01	.	664	1	hypothetical protein			N	Y	Y	2.3	0	0.2	0	0.3	0	0	0.5	0	0	0	0	0	0.2	0.2	0.1	0	0.2	0	0	0	0	0	0	0
AgB01	8211688	8212160	AgB01_g529_t01	.	473	1	hypothetical protein			N	Y	Y	2.9	0	0.2	0	0.1	0.1	0.1	0.1	0	0	0.2	0	0.2	0.1	0	0.1	0	0.1	0.1	0.1	0.1	0	0	0	0
AgB01	8222658	8223447	AgB01_g530_t01	+	790	1	hypothetical protein			N	N	N	0.2	0.2	0	0	0	0.3	0.1	0.4	0	0.2	1.2	1.1	1.5	1.7	1	0.6	3.5	0.8	2.3	2.9	2.6	4.4	0	0	0
AgB01	8222693	8226521	AgB01_g530_t02	+	649	2	G-protein coupled receptor 52			N	N	N	0.1	0.2	0.1	0	0	3.5	1.2	2.1	0	1.7	5	7.2	3.9	4.7	3.6	2.5	0.9	1.9	3.5	4.8	4.3	5.3	0.2	0	0
AgB01	8222693	8233131	AgB01_g530_t03	+	963	4	G-protein coupled receptor 52			N	N	N	1	0.2	0.1	0.1	0	6.8	3.8	4.6	0.2	2.6	7.9	10.8	11.6	9.6	7.2	6.8	2.9	5	7	9	7.9	12.6	0.6	0.2	0
AgB01	8225087	8244655	AgB01_g530_t04	+	4572	5	G-protein coupled receptor 52			N	Y	Y	1.8	0.5	0.4	0	0	2.9	2.1	2.3	0.4	1.7	5.7	6.8	7.2	5.1	5.7	4.3	3.7	3.1	4	4.9	6	16.3	0.5	0.2	0
AgB01	8245129	8258284	AgB01_g531_t01	-	3242	10	hypothetical protein			N	N	N	5.7	2.7	2	0.4	1.5	12.6	4.8	5.3	1.4	0.6	1.5	1	1.5	1.5	4.4	3.4	2.5	7.3	5.6	5.3	2.6	2.7	0.6	0.7	1.3
AgB01	8245129	8261979	AgB01_g531_t02	-	3848	12	hypothetical protein			N	N	N	6.9	3.1	2.5	0.4	1.8	14.4	5.7	6.5	1.6	0.5	1.5	1	1.6	1.7	4.4	3.3	2.4	6.6	5.4	5	2.6	1.8	0.6	0.7	1.4
AgB01	8245129	8261979	AgB01_g531_t03	-	2652	13	hypothetical protein			N	N	N	10	4	3.7	0.6	2.7	21.2	8.5	9.6	2.3	0.7	1.9	1.4	2.4	2.3	4.8	3.8	3.3	5.7	5.5	5.2	2.6	2	0.7	0.8	1.7
AgB01	8245129	8263440	AgB01_g531_t04	-	3481	14	hypothetical protein			N	N	N	8.6	4	3.1	0.4	2.3	18.4	7.6	8.2	1.5	0.6	2	1.3	1.7	2	5.3	4.1	3	7.8	6.2	5.9	3	2.5	0.7	0.9	1.6
AgB01	8245129	8263440	AgB01_g531_t05	-	3478	14	hypothetical protein			N	N	N	8.6	4	3	0.5	2.5	18.8	7.6	8.2	1.7	0.7	2	1.3	1.9	2.1	5.4	4.1	3	8	6.2	5.9	3.1	2	0.8	0.9	1.6
AgB01	8245129	8263440	AgB01_g531_t06	-	2255	15	hypothetical protein			N	N	N	13.2	5.7	4.6	0.8	3.9	28.9	11.7	12.6	2.4	1	2.6	1.9	2.9	3	6.4	5.1	4.4	7.6	6.8	6.6	3.4	2.3	0.9	1.2	2.1
AgB01	8245129	8263440	AgB01_g531_t07	-	2267	15	hypothetical protein			N	N	N	13.3	5.6	4.6	0.7	3.9	28.4	11.6	12.5	2.3	1	2.6	1.8	2.8	2.9	6.3	5	4.4	7.5	6.8	6.5	3.4	2.3	0.9	1.2	2.1
AgB01	8245129	8263457	AgB01_g531_t08	-	2272	15	hypothetical protein			N	N	N	13.1	5.6	4.6	0	3.9	28.6	11.6	12.5	2.4	1	2.6	1.8	2.9	2.9	6.3	5.1	4.4	7.6	6.8	6.6	3.4	2.3	0.9	1.2	2.1
AgB01	8245129	8263457	AgB01_g531_t09	-	4253	13	hypothetical protein			N	N	Y	7.4	3.4	2.6	0.4	2.1	15.3	6.3	6.7	1.5	0.6	1.6	1.1	1.7	1.7	4.4	3.5	2.5	6.8	5.2	5	2.7	1.6	0.6	0.8	1.3
AgB01	8245129	8263457	AgB01_g531_t10	-	3468	14	hypothetical protein			N	N	N	8.8	4.1	3.1	0.5	2.5	18.9	7.6	8.2	1.6	0.7	2	1.3	1.9	2.1	5.4	4.1	3.1	8	6.3	6	3.1	2.5	0.8	0.9	1.6
AgB01	8248084	8261646	AgB01_g531_t11	-	2242	10	hypothetical protein			N	N	N	10.5	4.3	4.4	0.6	3	23	8.8	9.9	1.9	0.8	1.7	1.5	2.7	2.2	4.6	3.7	3.6	5.3	5.3	5.3	2.8	2.3	0.6	0.7	1.9
AgB01	8248084	8263440	AgB01_g531_t12	-	2205	12	hypothetical protein			N	N	N	12.8	5.4	5	0.8	3.9	28.1	11.1	11.9	1.9	1	2.3	1.8	2.9	2.5	5.5	4.5	4.3	6.5	5.9	6	3.3	2.4	0.7	1	2.1
AgB01	8248084	8263457	AgB01_g531_t13	-	2222	12	hypothetical protein			N	N	N	12.7	5.4	4.9	0.8	3.8	27.9	11	11.8	1.9	0.9	2.3	1.7	2.9	2.5	5.5	4.5	4.2	6.5	5.8	6	3.2	2.3	0.7	1	2.1
AgB01	8253715	8263440	AgB01_g531_t14	-	1027	7	hypothetical protein			N	Y	N	17.2	7.4	6.4	0.9	5.9	38.3	16.4	17.1	2	1	2.6	1.7	2.9	3	7.3	5.2	4.6	6.7	6.6	6.4	4.1	1.7	0.8	1.4	2.1
AgB01	8264085	8265596	AgB01_g532_t01	.	1512	1	hypothetical protein			N	Y	Y	3.6	1.3	1.9	0.1	0.2	0.8	0.6	0.5	0.1	0	0.1	0	0.4	0.1	0.1	0	0	0	0	0	0	0	0	0	0.3
AgB01	8266072	8281688	AgB01_g533_t01	-	7986	7	F-box/WD repeat-containing protein 1A			N	N	N	8.1	2.6	2.1	4.1	1.9	9.6	3.4	3.8	1.1	1.8	9.5	5.8	3.7	5.2	11.9	10.5	6.8	10.1	10	8.9	5.6	6.7	2.6	1.9	2
AgB01	8266072	8285722	AgB01_g533_t02	-	6267	12	F-box/WD repeat-containing protein 1A			N	N	N	11.4	3.4	3	7.1	3.1	17.5	5.9	6.8	1.8	2.5	13.2	8.2	5.4	8.1	15.8	14.7	8.1	13	12.6	11.4	6.9	9.9	3.3	2.9	2.4
AgB01	8266072	8292560	AgB01_g533_t03	-	6853	16	f-box wd repeat-containing protein 11	SL		N	N	N	12.1	3.3	4.1	0	4.6	23.4	8.6	9.6	2.5	2.7	14.5	9.6	7.3	9.7	18.5	17.2	10.4	14.7	14.5	12.6	7.7	10.6	3.4	3.3	2.4
AgB01	8266072	8294265	AgB01_g533_t04	-	7003	17	f-box wd repeat-containing protein 11	SL		N	N	N	11.9	3.2	4	9.6	4.5	22.9	8.5	9.5	2.4	2.7	14.7	9.5	7.7	9.7	17.9	16.7	10.3	14.3	14.1	12.4	7.6	9.9	3.3	3.2	2.4
AgB01	8266072	8294265	AgB01_g533_t05	-	7017	17	f-box wd repeat-containing protein 11	SL		N	N	N	12	3.3	4.1	9.7	4.5	23.2	8.5	9.5	2.4	2.7	14.6	9.6	7.7	9.7	17.9	16.7	10.4	14.3	14.2	12.4	7.6	10.8	3.3	3.2	2.4
AgB01	8266072	8294265	AgB01_g533_t06	-	8306	16	f-box wd repeat-containing protein 11	SL		N	N	Y	10.8	3	3.6	8.3	3.8	19.7	7.2	8	2.1	2.3	12.3	8.2	6.6	8.2	15.8	14.7	10	12.8	12.4	10.9	6.7	8.9	3	2.7	2.3
AgB01	8266072	8294348	AgB01_g533_t07	-	7096	17	f-box wd repeat-containing protein 11	SL		N	N	N	11.7	3.2	3.8	9.2	4.2	22.1	8	9.1	2.3	2.6	14.2	9.3	7.4	9.3	17.4	16.1	9.9	14	13.7	12.1	7.4	10.7	3.2	3.1	2.4
AgB01	8266072	8294348	AgB01_g533_t08	-	7102	17	f-box wd repeat-containing protein 11	SL		N	N	N	11.6	3.2	3.8	9.2	4.1	22.1	8	9.1	2.2	2.7	14.4	9.4	7.5	9.5	17.4	16.2	9.9	13.9	13.7	12.1	7.4	10.2	3.2	3.1	2.4
AgB01	8281882	8294265	AgB01_g533_t09	-	1548	9	f-box wd repeat-containing protein 11	SL		N	Y	N	17.7	3.2	8.4	22.5	10.4	54.5	21.1	23.4	5.6	3.9	18.2	14.8	17.1	17.5	24.9	26.3	20.9	19.5	20.9	18	11.3	11.2	3.1	4.5	2.3
AgB01	8285894	8288092	AgB01_g534_t01	+	2199	1	LINE-1 reverse transcriptase			N	Y	Y	6.4	12.6	4.6	0.1	0.5	0.5	0.2	0.3	0.2	0.2	0.3	0.3	0.4	0.4	0.6	0.6	0.5	0.7	0.5	0.6	0.6	0.8	0.5	0.5	0.3
AgB01	8285894	8288944	AgB01_g534_t02	+	1374	3	LINE-1 reverse transcriptase			N	N	N	22	37.9	17.3	2.5	3.9	5.3	2.7	2.7	1.4	0.8	2.5	2.4	2.3	2.6	4	4.1	3.6	4.3	3.9	3.5	3.1	1.3	2.8	2.8	2
AgB01	8288408	8288944	AgB01_g534_t03	+	537	1	f-box wd repeat-containing protein 11			N	N	N	3.7	1.2	2.8	5.7	4.5	11.6	5.3	5	2.1	0.2	2.3	1.7	2.6	3.3	4.4	5.4	6	3.6	5.4	3.4	1.4	0	0.4	0.8	0.3
AgB01	8294577	8306698	AgB01_g535_t01	+	8078	4	60S ribosomal protein L11, partial	SL	Telo	N	Y	Y	26.2	4.2	10.3	9.5	9.2	13.7	10.6	10.1	13.3	18.5	19.1	15	11.3	10.5	16.1	18.3	28.8	72	67.4	55.1	53.1	39.2	36.9	18.3	28.2
AgB01	8294992	8306698	AgB01_g535_t02	+	5578	5	60S ribosomal protein L11, partial	SL	Telo	N	N	N	36.4	6	14.6	13.7	13.2	19.5	15.3	14.5	19.2	26.2	25.9	20	14.6	13.8	20.9	24.3	38.3	97.5	92.6	73.2	71.9	52.1	51.7	25.4	38.7
AgB01	8295525	8306698	AgB01_g535_t03	+	6036	5	60S ribosomal protein L11, partial	SL	Telo	N	N	N	34.3	5.6	13.7	12.7	12.2	18.1	14.2	13.5	17.8	24.3	24.3	19	14.4	13.2	19.8	22.9	36.7	90.7	86	68.5	66.9	48.1	47.4	23.5	35.8
AgB01	8317026	8328367	AgB01_g536_t01	+	3800	13	ADAM 17 protease			N	Y	N	13.4	2.3	3.9	2.6	3.4	13.5	7	6.7	2.7	3.9	4.3	6.1	7.3	17.6	10.4	12.3	9.6	9.7	9.2	10.9	9.5	9.6	2.9	1.4	5.1
AgB01	8317026	8329485	AgB01_g536_t02	+	3394	15	ADAM 17 protease			N	N	N	15.5	2.6	4.5	3	3.8	15.4	8	7.7	3	4.3	4.7	7	8.1	20.3	10.4	13.2	10.8	11.3	10.8	12.9	11.1	10.7	3.1	1.6	5.9
AgB01	8317026	8329485	AgB01_g536_t03	+	3236	14	ADAM 17 protease			N	N	N	14.7	2.4	4.3	2.9	3.8	14.7	7.8	7.3	3	4.1	4.6	6.8	8.2	19.6	10.3	12.7	11.1	10.7	10.4	12.3	10.8	10.7	2.9	1.4	5.5
AgB01	8317026	8335658	AgB01_g536_t04	+	7409	16	ADAM 17 protease			N	N	N	10.5	14.2	4.2	0	2.3	7.6	4.2	4	1.8	3.1	4.5	4.6	5	12.7	8.1	8.9	6.2	9.1	9.2	10.7	10.7	12.8	3.3	1.4	4.4
AgB01	8317026	8335658	AgB01_g536_t05	+	7135	17	ADAM 17 protease			N	N	N	10.9	14.7	4.3	1.8	2.4	8	4.4	4.2	1.9	3.3	4.7	5	5.3	13.6	8.6	9.3	6.6	9.5	9.7	11.3	11.3	13.3	3.5	1.4	4.6
AgB01	8317026	8335658	AgB01_g536_t06	+	7565	16	ADAM 17 protease			N	N	N	10.4	13.9	4.2	1.7	2.4	7.5	4.1	3.9	1.8	3.2	4.5	4.7	5.1	12.9	8.3	9.2	6.6	9.6	9.9	11.2	11.2	13	3.3	1.4	4.4
AgB01	8317026	8335658	AgB01_g536_t07	+	7557	16	ADAM 17 protease			N	N	N	8.9	7.5	3.2	1.6	2.1	7.3	3.9	3.7	1.7	2.5	3.3	3.9	4.3	11	6.6	7.5	6.1	7.5	7.8	8.6	8.4	9.2	2.4	1.1	3.6
AgB01	8317026	8335658	AgB01_g536_t08	+	6977	16	ADAM 17 protease			N	N	N	8.8	8	3.1	1.6	2.1	7.3	4.1	3.7	1.7	2.5	3.3	4	4.5	11.1	6.8	7.2	6.1	7	7.3	8.2	8.3	9.2	2.4	1.1	3.5
AgB01	8317026	8335658	AgB01_g536_t09	+	7999	15	ADAM 17 protease			N	N	Y	8.5	7.1	3.1	1.5	2	6.9	3.7	3.5	1.6	2.4	3.1	3.7	4.2	10.6	6.4	7.3	6.1	7.6	7.8	8.6	8.7	9.3	2.3	1	3.5
AgB01	8331146	8344949	AgB01_g537_t01	-	4898	6	glutaminase			N	N	N	5.4	34.3	5	0.3	1	0.3	0.2	0.3	0.3	1	1.9	1.3	1.4	2.9	2.7	2.6	0.7	3.2	3.3	4	5.1	6.7	1.4	0.4	1.2
AgB01	8331146	8344974	AgB01_g537_t02	-	4926	6	glutaminase			N	N	N	5.4	34	5	0.3	0.9	0.3	0.2	0.3	0.3	1	1.9	1.3	1.4	2.9	2.6	2.6	0.7	3.1	3.2	4	5	6.7	1.4	0.4	1.2
AgB01	8331146	8351540	AgB01_g537_t03	-	6021	14	glutaminase			N	N	Y	4.5	28	4.1	0.2	0.8	0.3	0.2	0.2	0.2	0.8	1.5	1.1	1.1	2.3	2.2	2.2	0.6	2.6	2.7	3.3	4.9	7.8	1.1	0.4	1
AgB01	8331146	8351609	AgB01_g537_t04	-	5261	14	glutaminase			N	Y	N	6.9	39.8	5.8	0.4	1.1	0.6	0.5	0.5	0.5	1.5	3.1	2.2	2	4.6	4.5	3.9	1.8	5.5	5.7	6.6	8.7	11.2	2.5	0.8	2.2
AgB01	8362505	8376164	AgB01_g538_t01	+	2321	6	5 -amp-activated protein kinase subunit beta-2	SL		N	Y	N	22.8	3.6	7.1	6.9	4.9	32	25.5	21.7	13.6	18.3	20.6	24.4	29.7	36.9	42.9	34.6	35.6	44.9	54.5	49.7	25.7	40.2	8.7	6.4	8.2
AgB01	8363159	8384997	AgB01_g538_t02	+	5164	12	5 -amp-activated protein kinase subunit beta-2	SL		N	N	Y	11.7	1.5	4.1	3.6	3.7	16.3	12.1	10.4	4.3	8	10.5	11.6	14.7	18.1	26.4	23.9	20.2	28.7	31.6	32.3	17	22.8	4.5	3	4.7
AgB01	8368972	8369608	AgB01_g538_t03	+	637	1	hypothetical protein			N	N	N	0.2	0.1	0.5	0	0.3	0.4	0.1	0.4	0.7	2.2	1.2	1.6	0.6	1.2	2	1.8	2.5	6.3	10.1	10.2	4.6	0	0.4	0.1	0.7
AgB01	8369086	8376164	AgB01_g538_t04	+	2043	5	5 -amp-activated protein kinase subunit beta-2			N	N	N	28.5	4.3	7.8	7.8	5.5	33.8	27.2	23.4	18.8	21.8	22.8	21.9	25.4	41.1	52	41.4	40.7	64.4	81.9	74.3	39.7	42.3	12.6	9.5	11.9
AgB01	8376684	8384997	AgB01_g538_t05	+	1933	8	divalent-cation tolerance protein			N	N	N	8.4	0.5	1.7	1.9	3	5.7	3.1	3	1.9	1.2	3.9	3.1	4.2	6.5	14.5	16.9	11.6	19.7	20.9	24.4	13.8	12.5	2.8	1.3	3
AgB01	8376704	8380054	AgB01_g538_t06	+	1240	4	divalent-cation tolerance protein			N	N	N	6.8	0.3	1.6	1.6	2.2	5.8	2.7	3.1	1.4	1.3	3.4	2.3	2.5	5.4	9.5	12.7	7	13.2	15.1	18.5	9.4	8.4	2.3	1.1	1.7
AgB01	8380120	8384997	AgB01_g538_t07	+	3558	3	divalent-cation tolerance protein			N	N	N	2.9	0.3	1.3	0.6	1.7	1.8	1.6	1.2	0.8	0.8	2.6	1.5	2.6	3.3	10.5	11	6.7	12.9	12.4	14.6	8.3	9.2	1.4	0.8	2.1
AgB01	8374743	8376021	AgB01_g539_t01	-	1279	1	5'-AMP-activated protein kinase subunit beta-2			N	Y	Y	18.1	2.6	2.6	3	1.7	7	8.7	7.3	18.5	14.5	18.1	12.9	10.9	23.3	31.8	25.6	19.4	43.6	59.4	54	30.6	35.1	10.3	7.7	9.2
AgB01	8386549	8399878	AgB01_g540_t01	-	1586	8	proton myo-inositol cotransporter			N	N	N	1.3	1.1	5.1	0.2	0.9	0.7	1.3	1.6	16.6	10.7	5.8	3.6	3.2	3.8	1.9	1.8	0.8	0.1	0	0.2	0.1	0	2.2	0.6	7.1
AgB01	8386549	8403908	AgB01_g540_t02	-	3067	13	proton myo-inositol cotransporter			N	Y	Y	0.7	0.6	2.9	0.2	0.9	0.6	1.2	1.4	10.1	6.6	3.6	2.8	2.3	2.6	1.5	1.1	0.5	0	0	0.1	0	0	1.5	0.5	5.3
AgB01	8386549	8409090	AgB01_g540_t03	-	2467	15	proton myo-inositol cotransporter			N	N	N	0.9	0.8	3.6	0.2	1.2	0.6	1	1.1	12	8.1	4.5	3.2	2.5	3.1	1.8	1.3	0.6	0	0	0.1	0.3	0	1.8	0.5	6.2
AgB01	8402125	8403533	AgB01_g540_t04	-	977	2	Proton myo-inositol cotransporter, partial			N	N	N	0.1	0	0	0	0.3	0.8	1.9	2.2	2.3	0.4	1.5	3.1	2.4	1.7	1.2	0.5	0.3	0	0	0	0.1	0	0.5	0.3	2.7
AgB01	8404985	8413557	AgB01_g541_t01	+	986	6	hypothetical protein			N	Y	N	3.3	4.1	80.7	67	24.9	19.9	29.2	27.1	15.7	9.4	43.8	40.8	34.9	38.9	24.5	22.8	11.6	2.5	0.4	0.4	6.8	24.5	3.4	0.7	0
AgB01	8405594	8413557	AgB01_g541_t02	+	1730	5	hypothetical protein			N	N	N	2.3	2.9	51.1	42.5	15.7	12.5	19	18.1	9.8	6.4	30.1	27.6	25.4	26	16.2	15	7.5	1.7	0.2	0.3	4.4	16	2.3	0.5	0
AgB01	8405694	8406926	AgB01_g541_t03	+	1233	1	hypothetical protein			N	N	N	0.3	0.1	1.8	2.7	0.6	1.4	1.3	1.1	1.3	1.9	6	6.4	2.5	5.8	3	2.2	0.4	0.3	0.1	0.1	1.1	4.2	0.3	0.3	0
AgB01	8406292	8413557	AgB01_g541_t04	+	4476	3	hypothetical protein			N	N	Y	1.6	3.2	17.5	13.9	5	5.8	7.9	7.1	3.8	2.2	9.8	9.4	7.7	8.6	5.5	5	2.3	0.5	0.1	0.2	5.9	7	0.9	0.3	0
AgB01	8410550	8413557	AgB01_g541_t05	+	1538	3	hypothetical protein			N	N	N	3.4	4.9	33.9	25.1	12.2	8.9	13.7	13.3	6	2.6	15.3	11.4	17.6	11.6	6.9	7.7	5	0.9	0.2	0.2	6	5.6	1.6	0.3	0
AgB01	8412144	8413557	AgB01_g541_t06	+	884	2	hypothetical protein			N	N	N	3	5.5	48.9	36.1	18.1	10.6	17	16.3	9	3.5	18.6	13.3	20.3	14	8.2	9.5	6.9	1.2	0.2	0.2	6.6	7.8	2	0.4	0
AgB01	8413281	8414775	AgB01_g542_t01	-	1302	2	Solute carrier family 22 member 3			N	N	N	1.7	2.3	33	6.4	2.1	1.5	3.2	3.4	1.6	0.9	6	4.4	7.3	4.8	2.9	2.8	1.3	2.8	1.4	2.4	6.2	2.7	0.6	0.1	0
AgB01	8413281	8423576	AgB01_g542_t02	-	2668	7	Solute carrier family 22 member 3	SL		N	Y	Y	1.6	1.6	59.5	4.1	1.4	0.9	1.6	1.8	0.8	0.6	3.1	2.5	3.6	2.8	1.7	1.7	1	4.3	2	2.8	8.7	4.5	0.4	0.1	0
AgB01	8416755	8418140	AgB01_g543_t01	+	1001	2	Solute carrier family 22 member 3			N	Y	N	1	0.8	36.7	0.6	0.4	0.2	0	0.1	0	0	0	0	0	0.2	0.1	0.2	0	2	0.4	1	2	1.7	0	0	0
AgB01	8416755	8418140	AgB01_g543_t02	+	1386	1	Solute carrier family 22 member 3			N	N	Y	0.7	0.6	20.7	0.3	0.2	0.2	0	0.1	0	0	0.1	0	0	0.1	0	0.2	0	1.6	0.5	1	1.7	2.5	0	0	0
AgB01	8443029	8466846	AgB01_g544_t01	-	2033	4	hypothetical protein	SL		N	N	N	0.5	0.4	0	0	0.1	0.6	0.7	0.9	0.7	0.1	0.6	0.6	0.9	0.7	0.3	0.3	0.1	0	0.1	0.1	0.1	0	5.6	4.4	0
AgB01	8443029	8466846	AgB01_g544_t02	-	2007	4	hypothetical protein	SL		N	N	N	0.5	0.4	0	0	0.1	0.7	0.7	0.9	0.7	0	0.6	0.6	0.9	0.7	0.3	0.3	0.1	0	0.1	0.1	0.1	0	5.4	4.3	0
AgB01	8443029	8467307	AgB01_g544_t03	-	2461	4	T. brucei spp.-specific protein	SL		N	Y	Y	0.6	0.3	0	0	0.1	0.5	0.6	0.7	0.6	0	0.5	0.5	0.8	0.6	0.2	0.2	0.1	0	0.1	0.1	0.1	0	4.3	3.5	0
AgB01	8463442	8464729	AgB01_g544_t04	-	1003	2	hypothetical protein	SL		N	N	N	0.9	0.3	0	0	0.2	0	0.1	0	0.2	0.1	0.3	0.2	0.2	0	0.7	0.2	0.1	0	0.1	0.2	0.1	0	11.2	9.1	0
AgB01	8463442	8464729	AgB01_g544_t05	-	1010	2	hypothetical protein	SL		N	N	N	0.9	0.3	0	0	0.2	0.1	0.1	0	0.2	0.2	0.3	0.2	0.2	0	0.7	0.3	0.1	0	0.1	0.2	0.2	0	11.4	9.3	0
AgB01	8463442	8464729	AgB01_g544_t06	-	984	2	hypothetical protein	SL		N	N	N	0.9	0.3	0	0	0.2	0.2	0.1	0	0.2	0.1	0.3	0.2	0.2	0	0.7	0.3	0.1	0	0.1	0.2	0.2	0	11	9.2	0
AgB01	8465735	8466407	AgB01_g545_t01	.	673	1	hypothetical protein			N	Y	Y	2.1	0	0	0	0	0	0	0.2	0	0	0	0	0.2	0	0.1	0	0	0	0	0	0	0	0	0	0
AgB01	8485319	8494571	AgB01_g546_t01	+	1431	7	neuropeptide ff receptor 2			N	Y	Y	0	0	0	0	0	0	0	0	0.3	0.2	0.1	0	0	0	0.8	0.2	0.1	0.2	0.2	0.7	1	4.8	0.1	0	0
AgB01	8485357	8487589	AgB01_g546_t02	+	627	2	neuropeptide ff receptor 2			N	N	N	0	0	0	0	0	0	0	0	0	0.4	0	0	0	0	0.4	0.1	0	0	0.3	0.6	0.6	5.5	0	0	0
AgB01	8492056	8492453	AgB01_g546_t03	+	398	1	neuropeptide ff receptor 2			N	N	N	0	0	0	0	0	0	0	0	0	0	0.1	0	0	0	0	0	0	0	0	0.6	1.5	0	0.1	0	0
AgB01	8498935	8511559	AgB01_g547_t01	-	1958	7	somatostatin receptor type 5			N	Y	Y	3.1	13.2	1.3	0.1	0.5	1	2.1	2.2	3.8	3.4	16.9	15.2	13.4	17.4	8.2	8.4	2.7	0.1	0	0.1	1.4	5.3	1	0.2	0
AgB01	8533259	8535838	AgB01_g548_t01	.	2580	1	Craniofacial development protein 2, partial		Telo	N	Y	Y	5.4	9.1	2	0.4	10.8	0.9	0.5	0.4	0.4	0.5	0.5	0.7	1	1	0.5	0.8	1.9	3.5	3.5	3.4	3.6	4	20.3	0.9	0.7
AgB01	8546994	8553935	AgB01_g549_t01	-	6653	2	aminopeptidase n			N	Y	Y	0.6	0.5	0.3	0.1	0.1	0.2	0.1	0.1	0.5	0.4	0.1	0.1	0.2	0.2	1.2	0.3	0.6	0.8	1.4	0.6	0.9	16.9	1.5	0.7	0.8
AgB01	8567343	8568182	AgB01_g550_t01	-	301	2	hypothetical protein			N	Y	Y	0	0.1	0.1	0	0	0	0	0	0	0.9	0	0	0	0	0	0	0	0	0	0	0	0	0	0	0
AgB01	8575824	8580024	AgB01_g551_t01	+	1762	5	hypothetical protein			N	Y	Y	0.5	0.1	0.1	0	0	0.1	0	0	0.2	0.1	0.9	0.9	0.8	0.6	0.2	0.1	0	0	0	0.1	4.2	1	0.1	0	0
AgB01	8586448	8586796	AgB01_g552_t01	.	349	1	Uncharacterized protein U88			N	Y	Y	0	0	0	0	0	0.4	0	0	0	0	0.4	0.2	0	0	0	0	0	0	0	0	0	0	0	0	0
AgB01	8589608	8605600	AgB01_g553_t01	+	2390	12	intermediate filament protein ifa-1			N	Y	N	0	0.1	0	0	0	0	0	0	0	0	0.1	0.1	0.1	0.1	0.7	0.6	0.1	0.1	0.2	1.2	13.5	13.7	0.3	0.1	0
AgB01	8589608	8605600	AgB01_g553_t02	+	2393	12	Intermediate filament protein ifa-1			N	N	Y	0	0.1	0	0	0	0	0	0	0	0	0.1	0.1	0.1	0.1	0.7	0.6	0.1	0.1	0.2	1.1	13.6	14.4	0.3	0.1	0
AgB01	8596057	8605600	AgB01_g553_t03	+	1476	8	intermediate filament protein ifa-1			N	N	N	0	0.1	0	0	0	0	0	0	0	0	0	0	0	0	0.8	0.4	0.1	0.1	0.2	1	15	14.1	0.8	0.9	0.1
AgB01	8596100	8605600	AgB01_g553_t04	+	1436	8	Intermediate filament protein ifa-1			N	N	N	0	0.1	0.1	0	0.1	0	0	0	0	0	0	0	0	0	0.8	0.4	0.1	0.1	0.2	1	15.1	15.6	0.8	1	0.2
AgB01	8596135	8602493	AgB01_g553_t05	+	1454	7	Intermediate filament protein ifa-1			N	N	N	0	0.1	0	0	0	0	0	0	0	0	0	0	0	0	0.6	0.4	0.1	0	0.1	0.9	11.8	7.1	0.2	0.1	0
AgB01	8604528	8605600	AgB01_g553_t06	+	1073	1	intermediate filament protein ifa-1			N	N	N	0	0	0	0	0	0	0	0	0	0	0	0	0	0	0.2	0	0.1	0	0	0.4	5.9	14.5	0.2	0.1	0
AgB01	8636068	8661577	AgB01_g554_t01	+	1705	8	hypothetical protein	SL	Telo	N	Y	Y	0.2	0.4	0.2	0.1	0.1	0.7	2.8	3	2.2	1.5	8.8	10.8	9.1	6.9	3.9	2.7	1.3	0.4	1.3	4.2	7.8	10.1	2.4	1.1	0
AgB01	8661721	8665940	AgB01_g555_t01	-	2329	3	pantothenate kinase 4			N	N	Y	1.6	0.3	0.1	0	0.1	1.5	0.9	0.8	0.2	0.1	0.5	0.9	1.6	0.8	3.3	2.7	3.2	0.4	0.4	1.8	5.7	0	0.3	0	0
AgB01	8661721	8665940	AgB01_g555_t02	-	2223	3	pantothenate kinase 4			N	N	N	1.4	0.3	0	0	0	1.3	0.9	0.7	0.2	0.2	0.5	0.7	1.2	0.8	2.5	2.4	2.9	0.4	0.4	1.7	5.5	0	0.3	0	0
AgB01	8661721	8665940	AgB01_g555_t03	-	2329	3	pantothenate kinase 4			N	Y	N	1.6	0.3	0.1	0	0.1	1.5	0.9	0.8	0.2	0.1	0.5	0.9	1.6	0.8	3.3	2.7	3.2	0.4	0.4	1.8	5.7	0	0.3	0	0
AgB01	8667947	8684785	AgB01_g556_t01	+	5883	9	Terminal uridylyltransferase 4	SL		N	N	N	9.8	4.7	1.4	0.7	2.2	6	2.8	2.8	1.2	1.2	3.1	3.1	4.3	3.8	5.7	4.8	4.9	7.4	9.6	11.2	9.7	4.1	1.1	0.6	0.7
AgB01	8667947	8684785	AgB01_g556_t02	+	5975	9	Terminal uridylyltransferase 4	SL		N	N	N	8.6	3.9	1.2	0.5	1.8	6.2	2.8	2.7	1.1	1.2	3	3.2	4.2	3.8	5.6	4.7	4.8	7.3	9.2	11	9.6	4.3	1.1	0.6	0.6
AgB01	8667949	8671207	AgB01_g556_t03	+	982	3	Terminal uridylyltransferase 4	SL		N	Y	N	10.1	2.2	2.3	0.7	3.1	14.3	6	7.1	1.6	3.1	10.3	13.4	18	9.3	14.2	11.6	13.1	15.4	19.4	26.9	20.8	10.6	1.8	0.9	1.2
AgB01	8667957	8684785	AgB01_g556_t04	+	6069	10	Terminal uridylyltransferase 4	SL		N	N	N	8.8	3.9	1.2	0.6	1.8	6.3	2.9	2.8	1.1	1.2	3.1	3.1	4.2	3.8	5.6	4.8	4.8	7.4	9.5	11.1	9.7	4.3	1.1	0.6	0.6
AgB01	8667957	8684785	AgB01_g556_t05	+	6070	10	Terminal uridylyltransferase 4	SL		N	N	Y	6.9	2.3	1	0.5	1.7	6	2.8	2.7	1	1	2.6	2.8	3.8	3.2	4.6	4	4.1	5.9	7.5	9	7.8	2.6	0.9	0.5	0.5
AgB01	8668028	8678095	AgB01_g556_t06	+	3212	5	Terminal uridylyltransferase 4	SL		N	N	N	7.2	1.8	1.6	0.6	2.2	8.4	3.8	3.7	1.5	1.4	3.7	4.6	6.1	4.3	6	5.9	5.8	9.4	11.1	13.2	11.3	4.3	1.2	0.6	0.9
AgB01	8668125	8684785	AgB01_g556_t07	+	5761	8	terminal uridylyltransferase 4	SL		N	N	N	8.5	4	1.1	0	1.8	5.9	2.6	2.5	1	1.2	3.1	3.3	4.4	3.8	5.6	4.7	4.8	7.3	9.2	10.8	9.4	4.2	1.1	0.6	0.6
AgB01	8668125	8684785	AgB01_g556_t08	+	5601	8	Terminal uridylyltransferase 4	SL		N	N	N	8.4	3.9	1.1	0.5	1.6	5.7	2.5	2.5	1	1.2	3.1	3.3	4.4	3.8	5.8	4.8	4.9	7.4	9.6	11.2	9.7	4	1.1	0.6	0.7
AgB01	8668160	8684785	AgB01_g556_t09	+	5420	8	Terminal uridylyltransferase 4	SL		N	N	N	8.2	3.9	1.1	0.5	1.5	4.9	2.2	2.3	1.2	1.1	3.1	3.2	4.2	3.6	5.7	4.6	4.8	7.1	9.3	10.9	9.4	4.1	1.2	0.6	0.7
AgB01	8670414	8684785	AgB01_g556_t10	+	5471	8	Terminal uridylyltransferase 4			N	N	N	6.5	2.3	1	0.5	1.5	5.2	2.5	2.4	1	0.6	1.4	0.9	1.3	2.2	3	2.7	2.6	4.6	6	6.3	6.4	1.6	0.8	0.4	0.4
AgB01	8671860	8678095	AgB01_g556_t11	+	1969	4	terminal uridylyltransferase 4			N	N	N	6.2	1.9	1.3	0.7	2.4	6.3	3	2.5	1.5	0.7	1	0.8	0.9	2.3	2.4	3.3	2.4	6.7	7.2	7.8	7.1	3.5	1	0.6	0.8
AgB01	8680373	8688102	AgB01_g557_t01	-	5109	4	Terminal uridylyltransferase 4		Telo	N	N	N	6.4	8.6	1	0.1	0.3	0.3	0.1	0.1	0.2	0.3	0.6	0.4	0.5	0.8	1.3	1	0.9	1.8	2.4	2.7	2.3	2	0.3	0.1	0.1
AgB01	8680373	8692839	AgB01_g557_t02	-	6809	6	Terminal uridylyltransferase 4		Telo	N	N	Y	9.7	14.9	1.4	0.1	0.3	0.3	0.1	0.1	0.2	0.3	0.5	0.4	0.5	0.7	1	0.7	0.7	1.4	1.8	2	1.7	1.5	0.2	0.1	0.1
AgB01	8680373	8692924	AgB01_g557_t03	-	5582	7	Terminal uridylyltransferase 4		Telo	N	N	N	12.1	17.1	1.7	0.1	0.6	0.6	0.2	0.1	0.3	0.4	1.1	0.7	0.8	1.3	2.5	1.6	2.1	2.8	4	4.3	3.8	1.9	0.6	0.2	0.2
AgB01	8685591	8692924	AgB01_g557_t04	-	1323	6	hypothetical protein		Telo	N	Y	N	31.9	55.6	5.6	0.2	0.6	0.2	0.2	0	0.3	0.4	0.5	0.4	0.4	0.9	0.6	0.2	0	0.2	0.4	0.9	0.7	0	0.2	0	0.1
AgB01	8694226	8698667	AgB01_g558_t01	-	2909	3	Cuticle collagen 10			N	Y	Y	1.8	1.5	0.1	0	0.2	0.3	0	0.1	0	0	0	0	0.1	0	0	0	0.2	0	0	0	0.1	0	0	0	0
AgB01	8700604	8714704	AgB01_g559_t01	+	2752	7	hypothetical protein	SL		N	Y	N	4.5	2.3	3.6	1.5	4	5.5	4	3.9	6.7	6.6	24	16.5	11.8	31.1	37.1	27	11.7	13.1	9.2	7.8	7	8.2	8.2	4.2	4.9
AgB01	8702994	8714704	AgB01_g559_t02	+	2789	7	hypothetical protein	SL		N	N	Y	4.5	2.3	3.6	1.5	3.9	5.6	4.1	3.9	6.7	6.5	23.6	16.8	11.9	31.2	36.3	26.7	11.8	13	9.1	7.7	6.9	8.1	8.1	4.2	4.9
AgB01	8702995	8714704	AgB01_g559_t03	+	2276	8	hypothetical protein	SL		N	N	N	5.4	2.7	4.3	1.8	4.8	6.8	4.9	4.6	8.1	7.3	26.7	19.9	13.4	35.6	40	29.1	13.9	14.2	10.1	8.7	7.8	6.8	8.7	4.5	5.4
AgB01	8703300	8714704	AgB01_g559_t04	+	2764	7	hypothetical protein	SL		N	N	N	4.5	2.3	3.6	1.5	4	5.6	4.1	3.9	6.7	6.6	23.6	16.4	11.6	31	36.4	26.9	11.7	13	9.2	7.7	7	8.1	8.2	4.2	4.9
AgB01	8703340	8714704	AgB01_g559_t05	+	2212	8	hypothetical protein	SL		N	N	N	5.5	2.8	4.5	1.8	5	7	5.1	4.7	8.4	7.5	27.1	19.5	13.2	36	40.8	29.9	14.1	14.5	10.3	8.9	8	7	8.9	4.6	5.5
AgB01	8703347	8714704	AgB01_g559_t06	+	1799	8	hypothetical protein	SL		N	N	N	6.7	3.4	5.3	2.2	5.9	8.5	6.1	5.7	10.2	8.6	30	22.5	15.2	41.2	45.4	33.8	15.8	16.6	12.1	10.3	9.3	8.6	9.5	4.8	5.9
AgB01	8719891	8756568	AgB01_g560_t01	+	4666	26	Cuticle collagen 99, partial	SL	Telo	N	N	N	30.6	46.3	795.6	11101.1	6063.5	18.6	44	4.8	1	0.7	7.2	4.8	6.5	4.6	6.3	6.2	5.1	1.6	0.6	0.2	0.5	0	125.9	0.2	0.1
AgB01	8743152	8756568	AgB01_g560_t02	+	3020	8	RecName: Full=Collagen alpha-2(IV) chain; Flags: Precursor	SL	Telo	N	Y	N	28.4	42.4	722.4	10202.7	5519.2	16.7	38.4	4.3	1.2	0.9	9.9	6.9	8.8	5.9	7.1	5.8	4.3	1.8	0.7	0.3	0.5	0	128.1	0.2	0.1
AgB01	8743152	8761857	AgB01_g560_t03	+	8284	9	RecName: Full=Collagen alpha-2(IV) chain; Flags: Precursor	SL	Telo	N	N	Y	13.3	19.8	335.8	4743.7	2659.7	8.2	18.1	2.1	0.5	0.6	4.5	3	3.6	2.7	4	3	2.1	1.6	1.1	1	1	2.1	61.9	0.3	0.1
AgB01	8743152	8761857	AgB01_g560_t04	+	6736	8	Cuticle collagen 99, partial	SL	Telo	N	N	N	12	17.4	292.5	4109.8	2269.9	6.8	15.7	2	0.6	0.6	5.2	3.5	4.1	3.2	3.9	3	2.1	1.8	1.4	1.2	1.1	2.6	53.4	0.4	0.2
AgB01	8743252	8761857	AgB01_g560_t05	+	7479	7	RecName: Full=Collagen alpha-2(IV) chain; Flags: Precursor	SL	Telo	N	N	N	17.2	25.3	445.3	6284.2	3466.2	10.8	23.7	2.6	0.6	0.6	4.7	3.2	4	2.9	4.4	3.3	2.5	1.7	1.2	1.1	1.1	2.3	77.2	0.4	0.1
AgB01	8738397	8741620	AgB01_g561_t01	-	2378	2	Cuticle collagen 12, partial			N	N	N	36.3	54.2	1029.5	14536.2	7955.1	25.2	54.9	4.9	0.5	0.1	0.1	0.6	1.4	0.6	7.4	4.5	3.4	0.9	0.1	0.1	0.4	0	145.5	0	0
AgB01	8738397	8745681	AgB01_g561_t02	-	2556	2	RecName: Full=Collagen alpha-2(IV) chain; Flags: Precursor			N	Y	N	25.7	38.5	724	10191	5573.5	17.7	37.9	3.3	0.1	0.1	0	0.5	0.4	0.4	4.1	2.2	2.4	0.6	0	0.1	0.3	0	106.2	0	0
AgB01	8738397	8747469	AgB01_g561_t03	-	4071	2	Cuticle collagen 99, partial	SL	Telo	N	N	N	30.3	44.8	831.6	0	6548.7	20.7	43.8	3.9	0.1	0.2	0.5	0.8	1.2	0.6	5.6	3.3	2.8	0.7	0.1	0.1	0.3	0	124.9	0	0
AgB01	8738397	8747469	AgB01_g561_t04	-	4356	2	Collagen alpha-2(IV) chain	SL	Telo	N	N	Y	12.5	19.1	343.2	4798.8	2469.3	7.9	17.5	1.4	0.1	0	0.2	0.3	0.4	0.2	2.1	1.2	1.4	0.3	0	0	0.1	0	49.3	0	0
AgB01	8738397	8747469	AgB01_g561_t05	-	3789	3	Cuticle collagen 99, partial	SL	Telo	N	N	N	31.1	45.9	853.7	12069.5	6640.1	21.1	45.1	3.9	0.1	0.2	0.5	0.9	1.2	0.6	5.7	3.3	2.8	0.7	0.1	0.1	0.3	0	126.7	0	0
AgB01	8738397	8747469	AgB01_g561_t06	-	3783	4	Cuticle collagen 12, partial	SL	Telo	N	N	N	15.8	24.3	430.6	6069	3220.5	10.2	22.5	1.9	0.1	0.1	0.3	0.5	0.5	0.3	2.7	1.3	1.4	0.5	0.1	0	0.1	0	58.8	0	0
AgB01	8738397	8747469	AgB01_g561_t07	-	4344	4	Cuticle collagen 99, partial	SL	Telo	N	N	N	16.1	24.7	453.3	6392.2	3440.2	11.1	23.9	2	0.1	0	0.2	0.3	0.6	0.3	2.8	1.6	1.6	0.4	0	0.1	0.2	0	68.8	0	0
AgB01	8743637	8745678	AgB01_g561_t08	-	917	2	Proline-rich protein 2			N	N	N	20.5	29.5	545.1	7649	4434.8	12.4	29.4	2.4	0	0.2	0	0.5	0.1	0.3	4	1.8	1.3	0.8	0	0	0.3	0	79.2	0	0
AgB01	8756406	8768199	AgB01_g562_t01	-	5503	8	myosin-8			N	Y	Y	2.7	2.4	11	127.5	84.5	1.4	2.3	1.4	0.8	0.8	2.6	1.5	1.5	2.9	3.1	3.1	2.2	3.5	3.6	3.4	2.8	2.2	5	0.7	0.5
AgB01	8756406	8768199	AgB01_g562_t02	-	5081	9	myosin-8			N	N	N	3.8	4	17.7	209	115.3	1.8	2.9	1.6	1	0.9	3.2	1.9	1.9	3.4	3.7	3.8	2.6	3.9	4.1	3.9	3	2.4	6.2	0.9	0.6
AgB01	8756406	8768199	AgB01_g562_t03	-	5081	9	myosin-8			N	N	N	3.7	4	17.7	209	115.3	1.8	2.9	1.6	1	0.9	3.2	1.9	1.9	3.4	3.7	3.8	2.6	3.9	4	3.9	3	2.4	6.2	0.9	0.6
AgB01	8772940	8778166	AgB01_g563_t01	-	848	6	myosin-8			N	Y	Y	10.8	2.9	8.6	3	8.5	9.1	6.9	8.2	7.5	1.6	5	4.7	8.4	9.5	7.7	11.8	9.7	9.1	10	9.6	6.4	6.1	2.4	2	1.5
AgB01	8780298	8786409	AgB01_g564_t01	+	1132	7	uridine diphosphate glucose pyrophosphatase			N	N	N	14.1	4.3	5.3	5.2	4.5	17.4	9.3	10.4	3.7	2.4	5.4	6	6.4	11.4	21.1	14.9	10.9	15.5	19.3	17.2	12.7	7.6	4	4.7	2
AgB01	8780298	8786409	AgB01_g564_t02	+	1132	7	uridine diphosphate glucose pyrophosphatase			N	N	N	14.1	4.3	5.3	5.2	4.5	17.4	9.3	10.4	3.7	2.4	5.4	6	6.4	11.4	21.1	14.9	10.9	15.5	19.3	17.2	12.7	7.6	4	4.7	2
AgB01	8780300	8792363	AgB01_g564_t03	+	5134	8	uridine diphosphate glucose pyrophosphatase			N	N	N	5.8	2.8	1.6	0	1.5	4.9	2.6	3	1.3	0.8	2.3	1.9	2.5	3.8	7.9	5.2	3.6	5.7	6.5	6.2	4.7	2.4	1.7	2.3	0.8
AgB01	8780300	8792363	AgB01_g564_t04	+	5134	8	uridine diphosphate glucose pyrophosphatase			N	Y	N	8.5	4.5	2.1	1.6	2.1	6	3.2	3.8	1.8	1.2	3.5	2.4	3	4.9	9.7	6.8	4.4	7.4	8.7	8.1	6.3	6.4	2.5	3.6	1.1
AgB01	8780315	8786409	AgB01_g564_t05	+	1137	7	uridine diphosphate glucose pyrophosphatase			N	N	N	13.8	4.3	5.2	5.1	4.5	17.1	9	10.3	3.6	2.3	5.5	6.1	6.4	11.1	20.3	14.3	10.3	15.2	19.1	16.7	12.2	7.6	4	4.6	2
AgB01	8780315	8786409	AgB01_g564_t06	+	1137	7	uridine diphosphate glucose pyrophosphatase			N	N	N	13.8	4.3	5.2	5.1	4.5	17.1	9	10.3	3.6	2.3	5.5	6.1	6.4	11.1	20.3	14.3	10.3	15.2	19.1	16.7	12.2	7.6	4	4.6	2
AgB01	8780315	8792363	AgB01_g564_t07	+	5141	8	uridine diphosphate glucose pyrophosphatase			N	N	N	5.8	2.8	1.6	1.3	1.5	4.9	2.6	3	1.3	0.8	2.3	2	2.5	3.8	7.7	5.1	3.5	5.7	6.5	6.1	4.6	2.4	1.7	2.2	0.8
AgB01	8780315	8792363	AgB01_g564_t08	+	5141	8	uridine diphosphate glucose pyrophosphatase			N	N	N	5.8	2.8	1.6	1.3	1.5	4.9	2.6	3	1.3	0.8	2.3	2	2.5	3.8	7.7	5.1	3.5	5.7	6.5	6.1	4.6	2.4	1.7	2.2	0.8
AgB01	8780320	8792363	AgB01_g564_t09	+	5648	7	uridine diphosphate glucose pyrophosphatase			N	N	Y	5.4	2.6	1.5	1.2	1.5	4.5	2.4	2.7	1.2	0.7	2.1	1.7	2.2	3.5	7.1	4.7	3.4	5.6	6.3	6	4.4	2.1	1.6	2	0.7
AgB01	8786732	8796713	AgB01_g565_t01	-	6240	4	uridine diphosphate glucose pyrophosphatase			N	N	N	7.4	8.4	1.2	0	0.6	0.9	0.5	0.7	0.4	0.3	1.1	0.6	0.5	1.1	1.7	1.4	0.7	1.6	2	1.8	1.7	3.3	0.7	1.1	0.3
AgB01	8786732	8798761	AgB01_g565_t02	-	6081	6	uridine diphosphate glucose pyrophosphatase		Telo	N	N	N	9.7	11.2	1.6	0.4	1.1	1.8	1	1.3	0.9	0.6	2	1	1.4	2.2	4.4	3	1.7	3.6	3.9	3.8	3.2	4	1.4	2.2	0.6
AgB01	8786732	8798768	AgB01_g565_t03	-	5922	7	uridine diphosphate glucose pyrophosphatase		Telo	N	N	N	9.7	9.9	1.4	0.4	1.1	1.9	1	1.3	0.9	0.6	2.1	1	1.4	2.3	4.4	3.1	1.7	3.6	4	3.9	3.3	4.1	1.5	2.2	0.7
AgB01	8786732	8798777	AgB01_g565_t04	-	6253	8	uridine diphosphate glucose pyrophosphatase		Telo	N	N	N	9	11.3	1.4	0.2	0.6	0.9	0.5	0.7	0.4	0.3	1.1	0.5	0.5	1.1	1.7	1.4	0.7	1.6	2	1.8	1.7	3.3	0.7	1.1	0.3
AgB01	8786732	8798797	AgB01_g565_t05	-	6273	7	uridine diphosphate glucose pyrophosphatase		Telo	N	N	Y	7.8	8.6	1.1	0.2	0.6	0.9	0.5	0.7	0.4	0.3	1.1	0.5	0.5	1.1	1.7	1.4	0.7	1.6	2	1.7	1.6	3.3	0.7	1.1	0.3
AgB01	8786732	8803504	AgB01_g565_t06	-	5506	4	uridine diphosphate glucose pyrophosphatase		Telo	N	N	N	5.9	5.3	0.8	0.2	0.6	1	0.5	0.8	0.5	0.4	1.2	0.5	0.5	1.2	1.9	1.5	0.8	1.8	2.3	1.9	1.8	3.8	0.8	1.3	0.4
AgB01	8795446	8798797	AgB01_g565_t07	-	1685	3	hypothetical protein		Telo	N	Y	N	9.7	15.1	1.2	0.1	0.2	0	0	0	0.1	0	0.2	0.1	0.3	0.4	0.1	0.1	0	0	0.1	0.3	0.4	0	0.1	0	0
AgB01	8813420	8830390	AgB01_g566_t01	+	1251	8	Zinc finger protein 79			N	Y	N	0	0.3	0	0	0	0	0.1	0.1	0	0	0.4	0.3	0.1	0.1	0.3	0	0.2	0.1	2.2	5	11.2	2.8	0.1	0	0
AgB01	8816936	8817681	AgB01_g566_t02	+	746	1	Zinc finger protein 79			N	N	N	0	0.1	0	0	0	0	0.1	0	0	0	0	0	0	0	0	0	0.3	0	1	1.9	2.2	0	0	0	0
AgB01	8819427	8819965	AgB01_g566_t03	+	539	1	Zinc finger protein 79			N	N	N	0	0.2	0	0	0	0	0.2	0.2	0	0	0	0	0	0	0.4	0	0	0	0.7	2.9	4.2	0	0	0	0
AgB01	8827632	8828247	AgB01_g566_t04	+	616	1	Zinc finger protein 79			N	N	N	0	0.2	0	0	0	0	0	0	0	0	0	0.2	0	0.1	0.2	0	0	0	0.6	1.5	2.7	0	0	0	0
AgB01	8829094	8830390	AgB01_g566_t05	+	1297	1	Zinc finger protein 79			N	N	Y	0	0	0	0	0	0	0	0	0	0	0.3	0.4	0	0	0	0	0	0.1	0.3	1.1	3.4	0	0	0	0
AgB01	8829094	8830390	AgB01_g566_t06	+	753	2	Zinc finger protein 79			N	N	N	0	0	0	0	0	0	0	0	0	0	0.6	0.3	0	0.1	0.1	0	0	0.1	0.6	1.7	5.5	0	0.1	0	0
AgB01	8832010	8842421	AgB01_g567_t01	+	2243	7	hypothetical protein		Telo	N	Y	Y	0	0	0	0	0	0	0	0	0	0	0	0	0	0	0.3	0.5	0.7	0.1	0.1	3.6	7.8	1.5	0.1	0	0
AgB01	8832010	8842421	AgB01_g567_t02	+	2201	7	hypothetical protein		Telo	N	N	N	0	0	0	0	0	0	0	0	0.1	0	0	0	0	0	0.3	0.5	0.7	0.1	0.1	3.8	8.1	1.6	0.1	0	0
AgB01	8832010	8842421	AgB01_g567_t03	+	1956	7	hypothetical protein		Telo	N	N	N	0	0	0	0	0	0	0	0	0.1	0	0	0	0	0	0.4	0.6	0.8	0.1	0.1	3.2	6.8	0.9	0.1	0	0
AgB01	8833869	8835871	AgB01_g567_t04	+	775	3	hypothetical protein			N	N	N	0	0	0	0	0	0	0	0	0	0	0	0	0	0	0	0	0	0	0	3.1	5.6	0	0	0	0
AgB01	8834651	8835099	AgB01_g567_t05	+	449	1	hypothetical protein			N	N	N	0	0	0	0	0	0	0	0	0	0	0	0	0	0	0	0	0	0	0	0.5	0.8	0	0	0	0
AgB01	8836502	8837762	AgB01_g567_t06	+	1261	1	hypothetical protein			N	N	N	0	0	0	0	0	0	0	0	0.1	0	0	0	0	0	0	0	0	0	0.1	0.9	1.8	0	0	0	0
AgB01	8841231	8841630	AgB01_g567_t07	+	400	1	hypothetical protein			N	N	N	0	0	0	0	0	0	0	0	0	0	0	0	0	0	1	0.6	0.3	0	0	0.9	4.6	4.3	0.1	0	0
AgB01	8870009	8881147	AgB01_g568_t01	+	1030	8	cathepsin b-like cysteine proteinase 6			N	N	N	0.1	0	0	0	0.1	0.7	3.3	2.7	1.4	2.1	1.7	2.4	1	2.3	1.2	1.2	0.4	0	0.2	1.2	4.2	1.7	0.1	0	0
AgB01	8870009	8888329	AgB01_g568_t02	+	3917	12	cathepsin b-like cysteine proteinase 6			N	Y	Y	0	0	0	0	0	0.3	1	0.9	0.6	0.9	1.2	1.1	0.4	1.1	1.7	1	0.3	0.1	0.1	0.5	2.5	0.9	0.1	0	0
AgB01	8870011	8881147	AgB01_g568_t03	+	1061	8	cathepsin b-like cysteine proteinase 6			N	N	N	0.1	0	0	0	0.1	0.7	3.2	2.6	1.4	2	1.7	2.6	1	2.3	1.3	1.2	0.4	0	0.2	1.1	4.1	1.6	0.1	0	0
AgB01	8870011	8888329	AgB01_g568_t04	+	3915	12	cathepsin b-like cysteine proteinase 6			N	N	N	0	0	0	0	0	0.3	1	0.9	0.6	0.9	1.2	1.1	0.4	1.1	1.7	1	0.3	0.1	0.1	0.5	2.5	0.9	0.1	0	0
AgB01	8871737	8888329	AgB01_g568_t05	+	3656	11	cathepsin b-like cysteine proteinase 6			N	N	N	0	0	0	0	0	0.3	1.1	1	0.6	0.8	1.2	1.1	0.4	1.2	1.7	1	0.3	0.1	0.1	0.4	2.2	0.9	0.1	0	0
AgB01	8887514	8891012	AgB01_g569_t01	-	2073	3	hypothetical protein			N	N	N	1.9	1	0	0	0.3	0.5	0.5	0.4	0.3	0.8	3.6	3.3	2.1	3.3	2.7	1.1	1	0.9	0.6	0.6	1.3	4.2	0.5	0.1	0
AgB01	8887514	8892062	AgB01_g569_t02	-	2162	4	hypothetical protein			N	N	N	1.9	0.9	0	0	0.3	0.5	0.5	0.3	0.3	0.9	3.9	3.7	2.4	3.6	2.8	1.3	1	0.9	0.6	0.6	1.3	4.8	0.5	0.2	0
AgB01	8887514	8894658	AgB01_g569_t03	-	2456	5	Na(+)/H(+) antiporter nhx-3			N	N	Y	2	1	0	0	0.4	0.5	0.4	0.3	0.3	0.8	4.1	3.5	2.5	3.6	2.9	1.4	1	1	0.7	0.6	1.4	4.9	0.5	0.1	0
AgB01	8887514	8894658	AgB01_g569_t04	-	2419	5	Na(+)/H(+) antiporter nhx-3			N	Y	N	2	1.1	0	0	0.4	0.6	0.5	0.3	0.3	0.9	4.3	3.7	2.7	3.9	3	1.5	1.1	1.1	0.7	0.6	1.4	5	0.5	0.1	0
AgB01	8900749	8906617	AgB01_g570_t01	-	345	2	hypothetical protein			N	Y	Y	0	0.2	0	0	0	0	0	0	0	0	0	0	0	0	0	0	0	0	0	0	0	0	0	0	0
AgB01	8908608	8933384	AgB01_g571_t01	-	5043	6	Alpha-1,3-mannosyl-glycoprotein 4-beta-N-acetylglucosaminyltransferase A, partial			N	N	N	7.8	10.7	0.8	0.3	1	2.2	1.2	1.2	3.3	2.4	3.4	2.3	1.4	4.6	3.8	2	0.9	0.5	0.2	0.4	8.6	3.8	1.6	0.3	1
AgB01	8908608	8933384	AgB01_g571_t02	-	5043	7	Alpha-1,3-mannosyl-glycoprotein 4-beta-N-acetylglucosaminyltransferase A, partial			N	N	N	7.2	10.1	0.8	0.3	1	2.2	1.2	1.2	3.3	2.4	3.3	2.3	1.3	4.5	3.7	2	0.8	0.5	0.2	0.4	8.3	3.8	1.5	0.3	0.9
AgB01	8908608	8947896	AgB01_g571_t03	-	4668	11	Alpha-1,3-mannosyl-glycoprotein 4-beta-N-acetylglucosaminyltransferase A, partial	SL		N	N	N	11.2	18.6	1.8	0.5	2	3.4	2.1	2.1	6.5	3.9	4.4	3.5	2.8	6.3	5.2	2.9	1.1	0.7	0.2	0.5	10.1	6.7	2.2	0.4	1.4
AgB01	8908608	8950279	AgB01_g571_t04	-	5308	12	Alpha-1,3-mannosyl-glycoprotein 4-beta-N-acetylglucosaminyltransferase A, partial	SL		N	N	Y	10.9	16.6	1.5	0.4	1.8	3	1.9	1.9	5.5	3.4	3.8	3	2.4	5.5	4.5	2.5	1	0.6	0.2	0.4	8.8	5.9	1.9	0.4	1.2
AgB01	8908608	8950386	AgB01_g571_t05	-	4148	13	Alpha-1,3-mannosyl-glycoprotein 4-beta-N-acetylglucosaminyltransferase A, partial	SL		N	N	N	12.5	20.1	1.8	0.6	2.3	3.8	2.4	2.4	7	4.3	5	3.9	3.1	7.1	5.8	3.3	1.2	0.8	0.2	0.5	11.2	7.5	2.5	0.5	1.5
AgB01	8908608	8950389	AgB01_g571_t06	-	4281	13	Alpha-1,3-mannosyl-glycoprotein 4-beta-N-acetylglucosaminyltransferase A, partial	SL		N	N	N	12.4	19.7	1.8	0	2.2	3.7	2.3	2.3	6.8	4.1	4.8	3.7	3	6.8	5.6	3.2	1.2	0.8	0.2	0.5	10.8	7.3	2.4	0.5	1.5
AgB01	8908608	8950462	AgB01_g571_t07	-	4354	13	Alpha-1,3-mannosyl-glycoprotein 4-beta-N-acetylglucosaminyltransferase A, partial	SL		N	N	N	12.2	19.4	1.7	0.5	2.2	3.6	2.3	2.3	6.7	4	4.7	3.7	2.9	6.7	5.5	3.1	1.2	0.7	0.2	0.5	10.7	7.1	2.3	0.5	1.5
AgB01	8926157	8938769	AgB01_g571_t08	-	1943	10	Alpha-1,3-mannosyl-glycoprotein 4-beta-N-acetylglucosaminyltransferase A, partial	SL		N	N	N	18.7	29.6	3	1	4.4	7.4	4.7	4.7	12.3	5.9	6.3	6.2	5.7	12.2	9	5.8	1.7	1.1	0.4	0.7	15.7	8.9	3.3	0.6	1.8
AgB01	8926157	8940232	AgB01_g571_t09	-	2630	10	Alpha-1,3-mannosyl-glycoprotein 4-beta-N-acetylglucosaminyltransferase A, partial	SL		N	Y	N	14.9	23.4	2.5	0.8	3.3	5.6	3.5	3.5	9.2	4.5	4.7	4.7	4.3	9.2	6.7	4.4	1.5	0.8	0.3	0.7	12.6	8.5	2.5	0.5	1.5
AgB01	8926157	8950279	AgB01_g571_t10	-	3281	12	Alpha-1,3-mannosyl-glycoprotein 4-beta-N-acetylglucosaminyltransferase A, partial	SL		N	N	N	13.8	22.1	2.2	0.6	2.8	4.4	2.8	2.8	7.8	4.1	3.8	3.8	3.4	7.2	5.8	3.6	1	0.7	0.2	0.5	10.1	7.4	2.2	0.4	1.4
AgB01	8926157	8950386	AgB01_g571_t11	-	2121	12	Alpha-1,3-mannosyl-glycoprotein 4-beta-N-acetylglucosaminyltransferase A, partial	SL		N	N	N	18.6	31.8	3.2	1	4.2	6.8	4.3	4.3	12	6.3	5.9	6	5.3	11.1	8.9	5.5	1.5	1.1	0.3	0.8	15.4	11.4	3.5	0.7	2.2
AgB01	8921952	8922396	AgB01_g572_t01	.	445	1	putative g-protein coupled receptor tkr-1			N	Y	Y	3	8.5	2.6	0.2	0.2	1.1	1.1	0.5	0.2	0.3	0.7	1.5	3.3	0.6	0.5	0.7	7.4	1.3	0.7	0.9	0.3	3.9	0.3	0	0.1
AgB01	8976226	8988670	AgB01_g573_t01	+	1340	9	tRNA guanosine-2'-O-methyltransferase TRM11			N	N	N	9.8	2	2.7	2.1	2.9	20.1	14.4	15.5	6.8	4.5	16.9	14.9	9.4	26.9	16.6	16.7	12.6	17.8	17.3	15.4	14.5	0	2.8	1.4	2.9
AgB01	8976226	8998210	AgB01_g573_t02	+	3252	10	trna (guanine -n2)-methyltransferase-like protein			N	N	N	4.5	1	1.1	1	1.1	8.6	6	6.7	3.5	2.5	10.2	7.4	5.2	13.6	8.8	9.7	7.7	10.4	10.5	10.5	8.6	5.8	6	7.1	4.6
AgB01	8976226	8998210	AgB01_g573_t03	+	3252	10	trna (guanine -n2)-methyltransferase-like protein			N	N	N	4.1	0.9	1.1	0.9	1.1	8.3	5.8	6.5	3	2.2	8.6	7	4.6	12.3	7.9	8.3	6.7	8.7	8.7	8.4	6.9	3.7	3.7	3.9	3
AgB01	8976226	8998210	AgB01_g573_t04	+	3342	11	tRNA guanosine-2'-O-methyltransferase TRM11			N	N	Y	4.6	0.9	1.2	0.9	1.2	9	6.5	7	3.2	2.2	8.6	6.9	4.5	12.7	8	8.5	6.6	9.2	9	8.6	7.3	3.6	3.6	3.8	3
AgB01	8976226	8998210	AgB01_g573_t05	+	3342	11	tRNA guanosine-2'-O-methyltransferase TRM11			N	N	N	4.6	0.9	1.2	0	1.2	9	6.5	7	3.2	2.2	8.6	6.9	4.5	12.7	8	8.5	6.6	9.2	9	8.6	7.3	3.6	3.6	3.8	3
AgB01	8976226	8998210	AgB01_g573_t06	+	3342	11	tRNA guanosine-2'-O-methyltransferase TRM11			N	N	N	4.6	0.9	1.2	0.9	1.2	9	6.5	7	3.2	2.2	8.6	6.9	4.5	12.7	8	8.5	6.6	9.2	9	8.6	7.3	3.6	3.6	3.8	3
AgB01	8976226	8998210	AgB01_g573_t07	+	3342	11	tRNA guanosine-2'-O-methyltransferase TRM11			N	Y	N	5	1	1.3	1	1.2	9.3	6.7	7.4	3.8	2.4	10.2	7.4	5.2	13.7	8.8	9.5	7.2	10.6	10.6	9.6	8.5	5.7	5.1	5.7	3.6
AgB01	8976226	8998210	AgB01_g573_t08	+	3252	10	trna (guanine -n2)-methyltransferase-like protein			N	N	N	4.5	1	1.1	1	1.2	8.7	6.1	6.9	3.5	2.5	10.3	7.4	5.3	13.5	8.8	9.5	7.4	10.2	10.4	9.6	8.1	5.8	5.2	5.8	3.6
AgB01	8979585	8989879	AgB01_g573_t09	+	1329	6	trna (guanine -n2)-methyltransferase-like protein			N	N	N	7	1.9	1.9	1.5	2.3	14.6	9.4	11	4.9	3.1	10.9	8.7	5.8	15.4	10	12.2	9.6	12.4	12.7	11.3	10	2.6	2.9	1.3	2.1
AgB01	8980600	8998210	AgB01_g573_t10	+	2480	7	trna (guanine -n2)-methyltransferase-like protein			N	N	N	10.3	5.6	7	4	2.7	21.1	10.6	10.8	6.5	1.9	9.1	5.5	3.9	9.8	6.3	8.6	6.2	9.3	9.6	10.1	7.6	7.7	7.4	9.1	5.5
AgB01	8988598	8992192	AgB01_g574_t01	-	3245	2	cysteine-rich protein			N	N	N	1.3	1.7	0.3	0.5	0.6	0.6	0.3	0.5	0.6	1.6	1.1	1	0.6	1.2	1.5	1.7	1.2	3.6	3.4	2.7	2.6	4.8	1.2	0.2	0.4
AgB01	8988598	8992751	AgB01_g574_t02	-	2593	4	cysteine-rich protein			N	N	N	2.1	2.5	0.3	0.6	0.7	0.6	0.4	0.6	0.9	2.1	1	0.8	0.6	1.3	1.6	1.8	1.6	3.5	3.5	2.7	2.2	5.3	1.6	0.2	0.5
AgB01	8988598	8992751	AgB01_g574_t03	-	3231	3	cysteine-rich protein			N	N	N	1.7	2.2	0.2	0.4	0.5	0.3	0.1	0.2	0.6	1.5	0.7	0.7	0.5	0.6	1.2	1.1	1.2	3.3	3	2.5	2	4.3	1.1	0.2	0.4
AgB01	8988598	9011664	AgB01_g574_t04	-	10674	10	Esterase	SL		N	N	N	5.1	7.9	3.1	0.2	1.1	0.3	0.2	0.3	0.7	0.6	1	0.7	0.7	1.3	1.7	1.9	1.7	3.9	3.7	5.8	4	2.9	4	7	4.6
AgB01	8988598	9011876	AgB01_g574_t05	-	10886	10	Esterase	SL		N	N	N	6.3	9.5	3.6	0	1.1	0.3	0.2	0.3	0.7	0.6	1	0.7	0.7	1.3	1.7	1.9	1.7	3.9	3.7	5.8	4	2.9	4	7	4.5
AgB01	8988598	9016378	AgB01_g574_t06	-	11188	12	Esterase	SL		N	N	Y	1.9	2.6	0.9	0.2	0.6	0.2	0.2	0.2	0.5	0.5	0.9	0.6	0.5	1.1	1.5	1.7	1.4	3.5	3.2	5.3	3.5	2.9	3.8	6.6	4.3
AgB01	8988598	9021684	AgB01_g574_t07	-	10835	11	Esterase	SL		N	N	N	2.1	2.9	1.1	0.2	0.6	0.2	0.2	0.2	0.5	0.6	1	0.6	0.6	1.2	1.6	1.8	1.5	3.6	3.4	5.5	3.7	2.9	4	6.9	4.5
AgB01	8999015	9016378	AgB01_g574_t08	-	2731	13	Esterase	SL		N	N	N	0.4	0.4	0	0	1.2	0.2	0.3	0.3	0.3	0.2	1.1	1.3	1.2	3	3.9	5.4	4.5	6.7	6.2	18.9	10.3	1.9	16.3	33	19.8
AgB01	8999015	9021751	AgB01_g574_t09	-	2445	12	Esterase	SL		N	Y	N	0.4	0.4	0	0	1.4	0.2	0.4	0.4	0.4	0.4	1.3	1.4	1.3	3.4	4.5	6.1	5	7.6	7.1	21.5	11.6	1.4	18.4	37.6	22.1
AgB01	9009283	9011661	AgB01_g574_t10	-	268	2	Esterase	SL		N	N	N	0	0	0	0	0	0	0	0.1	0.8	0.3	1.9	0.6	0	3.1	10.4	8.1	6.9	13.6	11.2	25.9	12.6	0	20.8	45.5	37.5
AgB01	9018768	9021751	AgB01_g574_t11	-	2201	2	hypothetical protein			N	N	N	0	0	0	0	0	0.1	0	0	0.3	0.2	0.1	0.1	0	0.1	0	0.6	0.4	0.9	0.9	2	1.2	0.8	2.2	1.3	6.8
AgB01	9039310	9049503	AgB01_g575_t01	+	1343	7	Aromatic-amino-acid aminotransferase 1	SL		N	N	N	20.1	16.9	6.3	3.2	2.2	18.8	10.4	10.9	3.8	2.3	5.5	5.8	9.1	12.4	36.3	33.8	46	31	34.1	24.6	11.3	3.9	5.1	9.1	3.5
AgB01	9039369	9049503	AgB01_g575_t02	+	1338	7	Aromatic-amino-acid aminotransferase 1	SL		N	Y	N	18.9	16.4	6.2	3.1	2.1	18.1	10	10.6	3.7	2.3	5.6	5.8	9	12	34.9	32.9	45.8	30	32.4	23.9	10.8	3.9	4.7	8.7	3.3
AgB01	9040120	9049503	AgB01_g575_t03	+	2116	6	Aromatic-amino-acid aminotransferase 1	SL		N	N	Y	12	10.5	4	2	1.4	11.4	6.3	6.7	2.3	1.5	3.6	3.9	5.9	8	22.8	21.2	29.6	19.2	20.8	15.3	6.9	2.5	3	5.6	2.1
AgB01	9059094	9064010	AgB01_g576_t01	-	836	3	Uncharacterized protein YER152C			N	Y	Y	12.2	10.2	2.4	1.3	1.8	9.6	5.8	4.7	1.5	0.3	2.2	1.2	2.8	5.2	14.3	16.8	10.4	22.2	23.3	21.4	11.2	0	3.3	4.7	1.9
AgB01	9064117	9082907	AgB01_g577_t01	+	5497	9	Innexin unc-9	SL		N	N	N	0.6	0.7	1.4	14.9	7.3	13.2	19.4	18.6	12.9	12.1	49.9	37.8	28.9	49.1	26.1	21.4	8.7	11.7	14	13	25	9.1	5.7	4.3	0.1
AgB01	9064117	9082907	AgB01_g577_t02	+	6490	8	innexin unc-9	SL		N	N	Y	0.3	0.4	0.7	8.9	4.4	7.4	10.1	9.9	6.4	4.3	18.9	14	11.2	23	11.5	9.3	3.7	4.8	5.6	5.6	11.7	3.2	2.6	2.1	0
AgB01	9064117	9082907	AgB01_g577_t03	+	5100	7	Innexin unc-9	SL		N	N	N	0.6	0.7	1.5	16.2	8	12.8	19.1	18.4	13.2	12.3	49	36.3	27.4	46.5	25.1	21.3	9	12.6	15.1	14	26.4	9.5	6.1	4.5	0.2
AgB01	9064134	9082907	AgB01_g577_t04	+	6041	6	Innexin unc-9	SL		N	N	N	0.3	0.4	0.8	10	5	6.7	9.2	9.2	6.5	4	16.3	11.5	8.9	19.3	9.9	8.6	3.7	5.2	6.2	6.2	12.4	3.4	2.9	2.2	0
AgB01	9064979	9082907	AgB01_g577_t05	+	5051	7	Innexin unc-9	SL		N	N	N	0.3	0.4	0.9	11.4	5.7	8.1	11.1	11.1	6.9	4.8	20.2	13.9	10.5	23.7	12.1	10.5	4.6	6.3	7.5	7.4	14.4	3.8	3.2	2.5	0
AgB01	9068536	9070615	AgB01_g577_t06	+	952	3	Innexin unc-9	SL		N	Y	N	0	2.4	0.2	0.6	0.2	7.3	9.6	9.4	4.2	4.5	26.1	23.8	20.3	35.1	16.7	9.4	1.9	0.2	0.1	1	5.8	1.8	0.6	1.4	0
AgB01	9076368	9085623	AgB01_g578_t01	-	6650	7	Maleylacetoacetate isomerase 2	SL		N	Y	N	0.4	0.5	0.9	6.8	3.3	10.9	18	16.4	11.1	11.6	48.9	40.6	33.3	46.1	22.7	20.7	10.7	17	20	16	22.9	6.5	4.7	3.6	0.2
AgB01	9076368	9085653	AgB01_g578_t02	-	7502	5	Maleylacetoacetate isomerase 2	SL		N	N	Y	0.2	0.3	0.4	2.9	1.4	6	10.5	9.2	6.1	7.7	32.3	28.3	23.4	29	14	13.2	6.8	11.2	13.2	10.2	13	4.8	2.4	1.9	0.1
AgB01	9076368	9086016	AgB01_g578_t03	-	7435	6	Maleylacetoacetate isomerase 2	SL		N	N	N	0.2	0.3	0.5	2.9	1.4	7.6	13	11.5	7.3	8.2	35.9	30.5	24.9	32.5	15.7	14.5	8.2	14.1	16.1	11.7	15	5.3	2.7	2.2	0.2
AgB01	9076368	9089780	AgB01_g578_t04	-	7411	5	putative maleylacetoacetate isomerase 2	SL		N	N	N	0.7	1.1	0.9	2.8	1.4	7.4	13.2	11.7	7.5	8.6	34.5	25.3	19.4	25.8	13	11.6	5.7	9.7	11.9	8.3	12.1	4.4	2.4	1.8	0.1
AgB01	9083061	9085965	AgB01_g579_t01	.	2905	1	putative maleylacetoacetate isomerase 2	SL		N	Y	Y	0	0	0	0	0.1	3.3	5	4.5	1.9	1.5	13	5.3	3.9	8.7	4.3	3.6	4.1	9.7	11.1	5.6	6.8	1.8	0.8	0.8	0.1
AgB01	9088612	9095502	AgB01_g580_t01	+	3544	6	putative maleylacetoacetate isomerase 2		Telo	N	N	N	9.1	20.8	9	0.3	1.8	32.6	60.5	56.6	21.6	52.3	211.6	119.4	79	64.4	21.8	11.2	3.7	0.6	0.2	0.4	0.3	0	4	1.3	0
AgB01	9088612	9095502	AgB01_g580_t02	+	4492	5	putative maleylacetoacetate isomerase 2		Telo	N	N	Y	7.5	16.3	7	0.2	1.4	25.4	47.7	44.3	16.8	41	166.2	92.9	62.4	50.2	17.1	8.7	2.9	0.4	0.2	0.3	0.3	0	3.1	1	0
AgB01	9088709	9095502	AgB01_g580_t03	+	2561	7	hypothetical protein		Telo	N	N	N	11.8	28.3	12.4	0.4	2.5	44.8	83.3	77.9	29.6	72.3	292.3	165.2	109.3	89.1	30.1	15.4	5.2	0.8	0.3	0.6	0.4	0	5.5	1.7	0.1
AgB01	9088800	9095502	AgB01_g580_t04	+	2662	7	hypothetical protein		Telo	N	Y	N	11.4	27.2	12	0.4	2.4	43.2	80.3	75	28.6	69.6	281.4	158.9	105.2	85.7	29	14.8	5	0.8	0.3	0.6	0.4	0	5.3	1.7	0
AgB01	9090971	9095502	AgB01_g580_t05	+	2453	4	hypothetical protein		Telo	N	N	N	10	22.1	9	0.3	1.8	33.1	55.9	55.4	24.1	64.7	269	148.3	102.3	74.7	26.1	13.2	4.4	0.7	0.3	0.6	0.4	0	5.1	1.6	0
AgB01	9096609	9102652	AgB01_g581_t01	+	2296	9	Tubulin alpha-2 chain		Telo	N	Y	Y	7.8	2	3.2	0.7	1.9	196.9	257.1	255.2	64.2	115.7	264.2	216.1	170.1	195.5	47.2	30.2	13.3	1	0.4	0.8	1.1	0.8	10.8	4.7	0.1
AgB01	9104342	9117448	AgB01_g582_t01	+	3109	15	protein zwilch-like protein	SL		N	N	N	29.4	22.8	3.6	0.8	2.3	30	31.3	30.7	30.5	11.8	57.6	48.9	43.5	58.3	44.9	36.4	25.4	28.3	40.8	25	13.7	2.8	4.9	0.8	0.7
AgB01	9104511	9117448	AgB01_g582_t02	+	3724	14	protein zwilch-like protein	SL		N	N	Y	24.8	19.2	3	0.7	1.9	25.1	26.1	25.6	25.5	9.9	48.3	41	36.3	48.9	37.6	30.4	21.3	23.6	34.2	20.9	11.4	2.3	4.1	0.6	0.6
AgB01	9104511	9117448	AgB01_g582_t03	+	3177	15	protein zwilch-like protein	SL		N	N	N	28.8	22.4	3.5	0.8	2.2	29.4	30.6	30	29.8	11.6	56.5	48	42.5	57.1	43.9	35.6	24.9	27.7	39.9	24.5	13.4	2.7	4.8	0.7	0.7
AgB01	9104511	9117448	AgB01_g582_t04	+	3117	15	protein zwilch-like protein	SL		N	N	N	29.3	22.8	3.6	0.8	2.3	30	31.2	30.6	30.4	11.8	57.5	48.8	43.4	58.2	44.8	36.3	25.4	28.2	40.7	25	13.6	2.8	4.9	0.8	0.7
AgB01	9104551	9117448	AgB01_g582_t05	+	2743	16	protein zwilch-like protein	SL		N	Y	N	33.2	24.5	4	0.9	2.6	34	35.4	34.7	34.5	12.6	60.8	53.5	48.3	64.2	47.6	38.3	27.6	30.1	43.8	26.6	14.6	2.5	5	0.8	0.7
AgB01	9118741	9124096	AgB01_g583_t01	+	2552	5	hypothetical protein	SL		N	Y	N	6.5	1.8	1.2	1.2	0.8	6.8	5.6	5	3.4	12.3	25.7	19.8	17.6	29	43.8	44.3	34.4	69.8	67.3	29.4	15.8	0.7	6.5	1	2.5
AgB01	9119117	9124096	AgB01_g583_t02	+	3027	4	hypothetical protein	SL		N	N	Y	5.5	1.5	0.9	1	0.6	5.5	4.6	4.1	2.9	10	20.9	15.8	13.9	23.1	35	35.1	27.7	56.9	54.5	23.7	12.9	0.6	5.4	0.8	2
AgB01	9124285	9130926	AgB01_g584_t01	+	1363	5	HD domain-containing protein 2	SL		N	Y	Y	13.3	1.6	2.1	1.1	2.5	14.1	11.3	11.9	2.9	1.5	7	5.2	7.1	8.6	12.4	19.1	22.5	45.9	36	16.6	21.3	3.8	5.3	2.8	1.7
AgB01	9124381	9130926	AgB01_g584_t02	+	1267	6	HD domain-containing protein 2	SL		N	N	N	14.2	1.7	2.3	1.2	2.7	15.1	12.1	12.8	3.1	1.7	7.5	5.6	7.6	9.2	13.4	20.5	24.2	49.3	38.6	17.8	22.9	4.1	5.7	3	1.8
AgB01	9132500	9133226	AgB01_g585_t01	-	727	1	hypothetical protein			N	N	N	2.4	0.2	0.7	0.6	0.6	0.5	0.2	0.2	1.7	2.5	0.9	0.6	0.9	0.7	1.7	1.1	0.8	2.1	2.7	1.5	0.8	0	2.5	0.5	0.8
AgB01	9132500	9137115	AgB01_g585_t02	-	3390	2	60S ribosomal protein L10	SL		N	N	N	16.8	2.6	2.2	2.4	6.6	10.8	10.7	9.5	3.9	5.1	6.9	7.3	5.9	9.6	10.5	12	15.4	18	18	9.5	8.9	11.7	4	1.5	2.1
AgB01	9132500	9137115	AgB01_g585_t03	-	3263	2	60S ribosomal protein L10	SL		N	N	N	16.9	2.7	1.3	0.9	6.1	10.6	10.2	9.1	3.7	4.2	7.2	7.4	5.8	9	10.7	11.7	14.6	18.6	18.7	9.7	8.8	11.7	3.9	1.6	2
AgB01	9132500	9137115	AgB01_g585_t04	-	3396	2	60S ribosomal protein L10	SL		N	N	Y	17.5	2.8	1.2	0.7	6.3	11.2	10.7	9.5	3.3	3.3	6.6	6.5	5.5	8.6	9.7	11	14	17.3	17.7	9.2	8.2	11.7	3.4	1.3	2
AgB01	9133481	9137115	AgB01_g585_t05	-	3059	2	60S ribosomal protein L10	SL		N	Y	N	17.8	2.8	1.4	1	6.6	11.3	10.9	9.7	3.9	4.9	7	7.2	5.8	9.3	10.3	12	15.8	18.7	19.1	9.8	8.9	12.4	4	1.7	2.1
AgB01	9132569	9133226	AgB01_g586_t01	+	658	1	hypothetical protein			N	N	N	2.6	0.2	0.8	0	0.7	0.6	0.3	0.2	1.8	2.7	0.9	0.6	1	0.7	1.8	1.2	0.8	2.3	3	1.7	0.9	0	2.7	0.6	0.9
AgB01	9132614	9137166	AgB01_g586_t02	+	2775	2	60S ribosomal protein L10	SL		N	N	N	43.1	7	4.8	4.8	16.8	29.8	27.4	25	8.2	7.1	25.2	26.6	22.1	29.4	35.5	39.7	39.6	59.2	56.9	38.6	30.6	20.6	7.5	2.9	4.5
AgB01	9132614	9137166	AgB01_g586_t03	+	909	4	60S ribosomal protein L10	SL		N	N	N	150.2	24.3	14	12.4	58.1	107.4	98.4	91.2	21.5	14.8	82.8	87.7	73.5	96.9	115.3	131.6	132.8	195.5	186.2	124.7	99.5	68.5	20.4	7.5	13.7
AgB01	9132614	9137166	AgB01_g586_t04	+	1202	4	60S ribosomal protein L10	SL		N	Y	N	67.9	11.1	2.9	0.6	24.1	48.4	42	39.9	8.5	6.7	45	48.9	40.2	47.9	61.8	68.4	59.6	101	94.4	69.4	51.5	21.6	9	2.7	5.5
AgB01	9133437	9137166	AgB01_g586_t05	+	2157	3	60S ribosomal protein L10	SL		N	N	N	38.8	6.3	3.4	2.9	14.8	28.8	25	23.7	5.4	4.6	25.3	27.2	22.3	27.4	34.6	38.7	34.3	57.7	54.3	39.8	29.6	12.8	5.4	1.9	3.4
AgB01	9133529	9137166	AgB01_g586_t06	+	3638	1	60S ribosomal protein L10	SL		N	N	Y	15.9	2.7	0.9	0.4	5.8	10.9	9.4	8.7	3	3.4	12.7	13.7	11.3	13.7	17.4	19.3	16.6	28.4	26.9	20.6	15	4.8	2.7	1	1.5
AgB01	9134090	9137166	AgB01_g586_t07	+	1193	4	60S ribosomal protein L10	SL		N	N	N	67.8	11.1	3	0.6	24.5	48.8	42.5	40.2	8.8	8.1	43.9	47.5	39.6	47.9	59.6	67.9	60.9	99.2	93.3	68.8	50.9	21.7	8.7	2.8	5.5
AgB01	9140662	9159556	AgB01_g587_t01	+	5231	22	Structural maintenance of chromosomes protein 1A	SL		N	N	Y	25.3	53.7	5.2	0.4	1.2	3.3	3.2	3.2	2	1.6	4.4	5.2	10.3	10.9	10.4	12.1	12.6	10.7	13.3	10.8	5.7	2.3	1.7	1.5	1.2
AgB01	9140662	9159556	AgB01_g587_t02	+	4079	22	sucrase- intestinal	SL		N	N	N	52.1	120.3	10.9	0.6	2.4	7.8	8.3	7.5	4.3	2.7	8.4	9	16	20.1	17.7	20.1	18.9	16.2	19.6	15.7	8.4	4.2	2.8	2.4	1.9
AgB01	9141291	9159556	AgB01_g587_t03	+	3438	22	sucrase- intestinal	SL		N	N	N	61.7	142.5	13	0.8	2.8	9.3	9.9	8.9	5.1	3.2	10	10.7	18.8	23.8	20.9	23.8	22.4	19.2	23.3	18.6	10	5	3.3	2.9	2.2
AgB01	9141291	9159556	AgB01_g587_t04	+	3418	22	sucrase- intestinal	SL		N	N	N	62.1	143.4	13	0	2.8	9.3	9.9	8.9	5.1	3.2	10	10.7	18.9	23.9	21	23.9	22.5	19.3	23.4	18.8	10	5.1	3.3	2.9	2.2
AgB01	9141336	9145942	AgB01_g587_t05	+	832	7	sucrase- intestinal			N	N	N	113.8	224.7	17.5	0.7	3	4.6	7.7	5.8	3.3	0.4	3.7	3.5	3.2	7.5	4.5	2.9	0.8	0.1	0.1	0.3	0.1	0	0.6	0.2	0.6
[truncated: 59,821 more rows]
