# Supplementary material for: Comparative genome analysis of programmed DNA elimination in nematodes
Source: HighWire-hosted journal article supplement (doi:10.1101/gr.225730.117), 2017-11-08
Supplement: Supplemental_Table_S5.xlsx [file Supplemental_Table_S5.xlsx]

## Sheet: Parascaris_genes_and_expression
Chromosome	Start	End	Transcript_name	Strand	Tx_length	# of Exons	Annotation	Trans-splicing	5'-M7G	Eliminated	Best_expressed_transcript	Largest_transcript	Testis	Ovary	Embryo	Intestine	Carcass
PgB01	4744	27216	PgB01_g001_t01	+	3573	27	80 kDa MCM3-associated protein			N	N	Y	10	10.3	8.4	5.4	1.4
PgB01	4810	27216	PgB01_g001_t02	+	3507	28	80 kDa MCM3-associated protein			N	N	N	10.2	10.5	8.3	5.5	1.4
PgB01	5951	27216	PgB01_g001_t03	+	3354	27	80 kDa MCM3-associated protein			N	Y	N	10.4	10.7	8.1	5.3	1.4
PgB01	33877	40229	PgB01_g002_t01	+	652	6	Transcription factor elt-2	SL		N	Y	Y	0	0.1	18.5	0.2	0
PgB01	44725	53563	PgB01_g003_t01	-	2251	10	cholinesterase	SL		N	Y	Y	1.3	0.9	3.2	4.3	7.1
PgB01	44725	53563	PgB01_g003_t02	-	2246	10	cholinesterase	SL		N	N	N	1.3	0.9	3.2	4.3	7.1
PgB01	55545	62572	PgB01_g004_t01	+	1194	8	Ribosome biogenesis regulatory protein	SL		N	N	N	9.5	16.2	2.6	6.2	2
PgB01	55642	62572	PgB01_g004_t02	+	1279	8	Ribosome biogenesis regulatory protein	SL		N	Y	Y	8.9	14.9	2.4	5.8	1.9
PgB01	99587	126911	PgB01_g005_t01	+	2668	15	Zinc finger protein 28	SL		N	Y	Y	0.3	21.5	10.8	2.2	1.4
PgB01	131845	140163	PgB01_g006_t01	-	1592	12	Periodic tryptophan protein 1	SL		N	N	N	12.4	8.3	9.7	10.3	2.7
PgB01	131845	140826	PgB01_g006_t02	-	2134	11	Periodic tryptophan protein 1	SL		N	N	N	12.5	6.4	7.3	7.7	2
PgB01	131845	140874	PgB01_g006_t03	-	3129	10	Periodic tryptophan protein 1	SL		N	N	Y	11.5	5.1	4.9	5.3	1.5
PgB01	131845	140874	PgB01_g006_t04	-	2564	11	Periodic tryptophan protein 1	SL		N	N	N	12.9	5.9	6.1	6.4	1.7
PgB01	131845	144262	PgB01_g006_t05	-	2743	13	Periodic tryptophan protein 1	SL		N	N	N	51.3	5.5	6.3	6.7	2.6
PgB01	131845	144262	PgB01_g006_t06	-	2200	13	Periodic tryptophan protein 1	SL		N	N	N	41.9	6.7	7.5	8.3	2.9
PgB01	132499	134077	PgB01_g006_t07	-	728	3	Periodic tryptophan protein 1			N	N	N	2	3.8	2	7	1.1
PgB01	132499	134782	PgB01_g006_t08	-	670	3	Periodic tryptophan protein 1			N	N	N	2	4.7	4.1	11.7	1.7
PgB01	141045	144259	PgB01_g006_t09	-	1352	3	hypothetical protein			N	Y	N	68.1	0.9	0.7	2	1.4
PgB01	141515	144259	PgB01_g007_t01	+	617	2	hypothetical protein			N	Y	Y	51.2	0.9	1.1	0.3	2.2
PgB01	148299	157180	PgB01_g008_t01	-	1759	12	major facilitator superfamily domain-containing protein 7-a			N	N	N	12.1	29.1	23.2	11.2	4.8
PgB01	148299	157422	PgB01_g008_t02	-	1780	12	major facilitator superfamily domain-containing protein 7-a			N	Y	Y	12	29	23	10.9	4.9
PgB01	167625	183810	PgB01_g009_t01	-	3340	21	prion-like domain-bearing protein 25			N	N	N	0.9	2.5	1.8	0.2	0.2
PgB01	167625	184472	PgB01_g009_t02	-	3517	22	prion-like domain-bearing protein 25			N	Y	Y	0.9	2.6	2.1	0.2	0.2
PgB01	188382	191417	PgB01_g010_t01	-	542	5	trafficking protein particle complex subunit 1	SL		N	N	Y	10.1	21.2	3.6	2.2	5.6
PgB01	189496	191409	PgB01_g010_t02	-	279	4	trafficking protein particle complex subunit 1	SL		N	Y	N	7.4	22.2	6.9	4.3	5.6
PgB01	194192	207238	PgB01_g011_t01	+	3451	22	ALG-1	SL		N	Y	N	8.9	34.2	33.4	11.9	2.5
PgB01	195073	207238	PgB01_g011_t02	+	3549	21	ALG-1	SL		N	N	Y	8.6	33	32.3	11.5	2.4
PgB01	195735	207238	PgB01_g011_t03	+	3419	21	ALG-1	SL		N	N	N	9	34.6	33.7	12	2.5
PgB01	211214	217637	PgB01_g012_t01	+	1840	10	receptor-type tyrosine-protein phosphatase beta		Telo	N	N	N	94.3	2.5	2.1	2.5	0.9
PgB01	211214	217637	PgB01_g012_t02	+	2306	10	receptor-type tyrosine-protein phosphatase beta		Telo	N	N	N	80.9	1.9	1.6	2	0.9
PgB01	211214	226366	PgB01_g012_t03	+	1966	12	Tyrosine-protein phosphatase non-receptor type 9		Telo	N	N	N	149.6	0.6	1.3	3.5	1.5
PgB01	218715	226366	PgB01_g012_t04	+	1953	11	Tyrosine-protein phosphatase non-receptor type 9		Telo	N	N	N	163.1	0.1	1.3	2.4	1.6
PgB01	218715	226366	PgB01_g012_t05	+	2066	12	Tyrosine-protein phosphatase non-receptor type 9		Telo	N	N	N	167.4	0.1	1.7	2.3	1.7
PgB01	218715	230523	PgB01_g012_t06	+	2994	16	Tyrosine-protein phosphatase non-receptor type 9		Telo	N	Y	Y	125.2	0.2	1.4	1.7	1.4
PgB01	218738	226366	PgB01_g012_t07	+	2280	10	tyrosine-protein phosphatase non-receptor type 9		Telo	N	N	N	134.7	0.1	1.3	1.8	1.2
PgB01	218741	226366	PgB01_g012_t08	+	2390	11	tyrosine-protein phosphatase non-receptor type 9		Telo	N	N	N	140	0.1	1.7	1.8	1.3
PgB01	226635	230523	PgB01_g012_t09	+	1238	6	hypothetical protein		Telo	N	N	N	38.6	0.4	0.4	0.3	0.9
PgB01	228468	230523	PgB01_g012_t10	+	862	2	hypothetical protein			N	N	N	14.8	0.2	0.6	0.4	0.7
PgB01	230840	238168	PgB01_g013_t01	-	2076	10	Eukaryotic initiation factor 4A		Telo	N	Y	Y	129.6	133.4	179.1	85.8	109.3
PgB01	242471	267368	PgB01_g014_t01	+	2119	14	Rho guanine nucleotide exchange factor 7	SL		N	N	Y	8.4	19.8	8.9	3.8	4.2
PgB01	242471	269689	PgB01_g014_t02	+	2109	14	rho guanine nucleotide exchange factor 6	SL		N	N	N	8.6	19.9	9	4.3	4.2
PgB01	242522	247693	PgB01_g014_t03	+	734	6	Rho guanine nucleotide exchange factor 7	SL		N	Y	N	11.4	31	14.9	2.5	4.4
PgB01	242838	247693	PgB01_g014_t04	+	610	6	Rho guanine nucleotide exchange factor 7			N	N	N	11.6	32.5	12	3	4.8
PgB01	242838	269689	PgB01_g014_t05	+	1934	14	rho guanine nucleotide exchange factor 6			N	N	N	8.3	19.5	7.7	4.7	4.4
PgB01	264663	269689	PgB01_g014_t06	+	776	6	rho guanine nucleotide exchange factor 6			N	N	N	3.4	3.6	0.4	4.1	4.6
PgB01	273280	284555	PgB01_g015_t01	+	2741	18	prolyl endopeptidase			N	N	Y	18.3	64	41.7	20.7	13.9
PgB01	273280	284555	PgB01_g015_t02	+	2741	17	prolyl endopeptidase			N	Y	N	18.3	64	41.7	20.7	13.9
PgB01	285814	296540	PgB01_g016_t01	+	1494	9	intraflagellar transport protein 46-like protein			N	Y	Y	0	0	1.2	0	0.5
PgB01	293684	295061	PgB01_g017_t01	+	114	2	intraflagellar transport protein 46-like protein			N	Y	Y	0	0	5.9	0	0
PgB01	305952	311771	PgB01_g018_t01	+	1184	7	Uncharacterized protein B0403.3	SL		N	Y	Y	0.6	1.2	0.1	3.1	38.8
PgB01	312708	329661	PgB01_g019_t01	-	3509	20	Patched-related protein 9	SL		N	Y	Y	2.3	2.2	11.9	63	13.2
PgB01	312708	329661	PgB01_g019_t02	-	3503	20	Patched-related protein 9	SL		N	N	N	2.3	2.2	11.9	63.1	13.2
PgB01	313799	319787	PgB01_g019_t03	-	1896	10	Patched-related protein 9	SL		N	N	N	2.4	1.9	9.1	47.5	9.4
PgB01	313799	327581	PgB01_g019_t04	-	3017	18	Patched-related protein 9	SL		N	N	N	2.5	2.2	12.1	68	14.1
PgB01	313799	327581	PgB01_g019_t05	-	3023	18	Patched-related protein 9	SL		N	N	N	2.5	2.2	12.1	67.9	14.1
PgB01	313799	327581	PgB01_g019_t06	-	3017	18	Patched-related protein 9	SL		N	N	N	2.5	2.2	12.1	68.1	14.1
PgB01	313799	329661	PgB01_g019_t07	-	3157	19	Patched-related protein 9	SL		N	N	N	2.4	2.1	11.8	65	13.5
PgB01	333096	338349	PgB01_g020_t01	-	1180	9	Tyrosine-protein kinase Fps85D			N	N	N	90.6	1.8	0.2	1.7	0.8
PgB01	333096	341305	PgB01_g020_t02	-	1623	11	Tyrosine-protein kinase Fps85D			N	N	N	85.1	1.3	0.2	1.9	1
PgB01	333096	341305	PgB01_g020_t03	-	1623	12	Tyrosine-protein kinase Fps85D			N	N	N	85.1	1.3	0.2	1.9	1
PgB01	333096	341354	PgB01_g020_t04	-	1672	11	Tyrosine-protein kinase Fps85D			N	N	Y	82.6	1.3	0.2	1.8	1
PgB01	333096	341354	PgB01_g020_t05	-	1672	12	Tyrosine-protein kinase Fps85D			N	Y	N	82.6	1.3	0.2	1.8	1
PgB01	333096	341354	PgB01_g020_t06	-	1672	12	Tyrosine-protein kinase Fps85D			N	N	N	82.6	1.3	0.2	1.8	1
PgB01	334116	340314	PgB01_g020_t07	-	1257	8	Tyrosine-protein kinase Fps85D			N	N	N	67.6	0.6	0.1	2.3	1.1
PgB01	334116	341305	PgB01_g020_t08	-	1427	9	Tyrosine-protein kinase Fps85D			N	N	N	67	0.5	0.1	2	1
PgB01	343677	345961	PgB01_g021_t01	-	691	3	cuticle collagen 19			N	Y	Y	1	0.3	1.2	0	0
PgB01	346551	349455	PgB01_g022_t01	-	693	5	cuticle collagen 19			N	Y	Y	0.6	0.5	0	0	0.5
PgB01	353009	354189	PgB01_g023_t01	-	472	2	hypothetical protein			N	Y	Y	0.3	1.1	0	0	0
PgB01	360822	381310	PgB01_g024_t01	+	3662	24	tudor domain containing protein			N	Y	N	33.5	16.9	8.9	1.3	0.4
PgB01	360956	381310	PgB01_g024_t02	+	4411	25	tudor domain containing protein			N	N	Y	28.2	14	7.4	1	0.4
PgB01	361744	381310	PgB01_g024_t03	+	3795	22	tudor domain containing protein			N	N	N	32.2	16.3	8.6	1.3	0.4
PgB01	361744	381310	PgB01_g024_t04	+	3795	22	tudor domain containing protein			N	N	N	32.2	16.3	8.6	1.3	0.4
PgB01	361744	381310	PgB01_g024_t05	+	3795	23	tudor domain containing protein			N	N	N	32.2	16.3	8.6	1.3	0.4
PgB01	361744	381310	PgB01_g024_t06	+	3795	23	tudor domain containing protein			N	N	N	32.2	16.3	8.6	1.3	0.4
PgB01	361901	377122	PgB01_g024_t07	+	2654	19	tudor domain containing protein			N	N	N	39	21.2	7.6	1.4	0.5
PgB01	390978	398720	PgB01_g025_t01	+	2790	8	ras-related protein rab-11b	SL		N	Y	Y	5.9	3.6	2.1	1	0.5
PgB01	392416	396447	PgB01_g025_t02	+	2069	6	ras-related protein rab-11b	SL		N	N	N	8.8	4.9	2.4	0.9	0.2
PgB01	392416	398720	PgB01_g025_t03	+	2489	7	ras-related protein rab-11b	SL		N	N	N	7	4	2.4	1.1	0.6
PgB01	396759	402327	PgB01_g026_t01	-	1802	7	cuticle collagen 19			N	N	N	4.2	1.3	3.6	5.2	1.5
PgB01	396759	409766	PgB01_g026_t02	-	3286	9	cuticle collagen 19	SL		N	Y	Y	1.9	0.6	2.2	3.7	0.9
PgB01	396759	409766	PgB01_g026_t03	-	2689	10	cuticle collagen 19	SL		N	N	N	1.6	0.6	2.7	4.6	1.2
PgB01	402612	410192	PgB01_g027_t01	+	1357	8	hypothetical protein	SL		N	Y	Y	2.8	4	8	70.5	19
PgB01	402703	408943	PgB01_g027_t02	+	624	6	hypothetical protein	SL		N	N	N	2	4.4	7.9	58.5	11.6
PgB01	402703	410192	PgB01_g027_t03	+	1259	8	hypothetical protein	SL		N	N	N	3	4.3	8.4	75.8	20.4
PgB01	411633	417521	PgB01_g028_t01	-	1544	11	ATP-dependent RNA helicase			N	Y	Y	5.4	5.4	6.7	3.6	1.1
PgB01	418353	422326	PgB01_g029_t01	+	932	6	Soma ferritin	SL	Telo	N	Y	Y	183.4	470.8	189.1	231	150.2
PgB01	423383	425776	PgB01_g030_t01	+	845	4	soma ferritin	SL		N	Y	Y	3.4	14.7	8.5	11.9	9
PgB01	426055	436200	PgB01_g031_t01	-	3805	12	trehalase			N	Y	Y	70.9	3.9	1.9	2	1.9
PgB01	426055	436200	PgB01_g031_t02	-	3678	12	trehalase			N	N	N	68.4	4	2	2.1	1.8
PgB01	436941	446524	PgB01_g032_t01	-	2499	15	hypothetical protein	SL		N	N	Y	6	8.6	5	0.3	0.8
PgB01	436941	446529	PgB01_g032_t02	-	2399	14	hypothetical protein	SL		N	N	N	5.8	8.1	4.9	0.3	0.7
PgB01	436941	446529	PgB01_g032_t03	-	2477	15	hypothetical protein	SL		N	Y	N	6.3	8.9	5.9	0.3	0.8
PgB01	448613	458571	PgB01_g033_t01	-	2035	17	hypothetical protein	SL		N	N	N	7.7	9.6	10.4	3.6	1.3
PgB01	448613	458609	PgB01_g033_t02	-	2163	17	hypothetical protein	SL		N	N	Y	7.7	9.9	9.8	3.4	1.7
PgB01	449454	458026	PgB01_g033_t03	-	1439	13	hypothetical protein	SL		N	Y	N	9.4	11.4	13.3	4.6	1.6
PgB01	461330	469074	PgB01_g034_t01	-	915	7	mechanosensory protein 3			N	Y	Y	0	0	0	0	0
PgB01	474219	476091	PgB01_g035_t01	+	974	2	hypothetical protein	SL		N	Y	Y	0	17.4	10.5	6	1.9
PgB01	476257	482095	PgB01_g036_t01	+	1209	7	hypothetical protein			N	Y	Y	0.4	15.6	6.9	5.1	0.6
PgB01	490544	494038	PgB01_g037_t01	+	1183	3	hypothetical protein	SL		N	Y	Y	0	7.8	16.3	0	0
PgB01	491489	494038	PgB01_g037_t02	+	926	3	hypothetical protein	SL		N	N	N	0	9.9	17.5	0.1	0
PgB01	491721	492051	PgB01_g037_t03	+	331	1	hypothetical protein	SL		N	N	N	0	1.6	9.1	0	0
PgB01	496505	501323	PgB01_g038_t01	+	1159	9	Exosome complex exonuclease RRP42			N	Y	Y	34.3	34.3	11.4	3.6	1.4
PgB01	496574	501323	PgB01_g038_t02	+	1055	9	exosome complex component rrp42			N	N	N	35.6	33.8	12.1	2.5	1.4
PgB01	502525	515236	PgB01_g039_t01	+	950	7	cre-tth-1 protein	SL		N	Y	N	46.4	386.4	69.3	26.8	17
PgB01	511480	515236	PgB01_g039_t02	+	1138	6	cre-tth-1 protein	SL		N	N	Y	38.7	323.3	57.9	22.4	14.2
PgB01	517692	537670	PgB01_g040_t01	-	2100	15	tyrosine-protein kinase ryk	SL		N	Y	Y	8.6	45.9	40.9	0.1	8.4
PgB01	518621	527407	PgB01_g040_t02	-	1540	11	tyrosine-protein kinase ryk	SL		N	N	N	9.7	43.6	42.7	0.1	8
PgB01	519424	537652	PgB01_g040_t03	-	1715	13	tyrosine-protein kinase ryk	SL		N	N	N	9.9	51.8	47.7	0.1	9.9
PgB01	557175	565501	PgB01_g041_t01	+	2197	13	Acetylcholine regulator unc-18	SL		N	Y	Y	8.9	26.8	16.8	9.4	5.3
PgB01	568476	574872	PgB01_g042_t01	-	1490	8	GDP-fucose protein O-fucosyltransferase 1	SL		N	Y	N	1.3	47.6	21.6	4.3	6.4
PgB01	568476	574874	PgB01_g042_t02	-	1517	8	GDP-fucose protein O-fucosyltransferase 1	SL		N	N	Y	1.2	46.9	21.2	4.3	6.3
PgB01	577606	585726	PgB01_g043_t01	-	1022	8	Syntaxin-6	SL		N	Y	N	2.6	14.8	7.3	5.1	4.6
PgB01	578961	584500	PgB01_g043_t02	-	608	6	Syntaxin-6	SL		N	N	N	4.3	24.2	12.3	8.5	6.4
PgB01	579203	585844	PgB01_g043_t03	-	1573	6	Syntaxin-6	SL		N	N	Y	1.5	9.2	4.7	3.3	3
PgB01	585343	599699	PgB01_g044_t01	+	1857	11	intraflagellar transport protein 81-like protein	SL		N	N	Y	0.3	0.2	0	0	1.2
PgB01	585343	599699	PgB01_g044_t02	+	1857	11	intraflagellar transport protein 81-like protein	SL		N	Y	N	0.3	0.2	0	0	1.2
PgB01	600498	603519	PgB01_g045_t01	+	426	3	intraflagellar transport protein 81-like protein			N	Y	Y	1	0.1	0	0	1.5
PgB01	602967	608471	PgB01_g046_t01	-	1747	8	hypothetical protein			N	Y	Y	6.8	30.9	8.9	0	0.6
PgB01	602967	608471	PgB01_g046_t02	-	1747	8	hypothetical protein			N	N	N	6.8	30.9	8.9	0	0.6
PgB01	617025	623741	PgB01_g047_t01	+	956	6	Nudix hydrolase 8	SL		N	Y	Y	2.2	6.7	0.4	1.7	1.1
PgB01	637929	653440	PgB01_g048_t01	-	3744	20	hypothetical protein	SL		N	N	Y	7.9	7.1	3.9	2.4	0.9
PgB01	637929	653440	PgB01_g048_t02	-	3594	20	hypothetical protein	SL		N	N	N	8.3	6.9	4.1	2.7	1
PgB01	637929	653449	PgB01_g048_t03	-	3715	21	hypothetical protein	SL		N	Y	N	8.3	7.3	4	2.6	1
PgB01	637929	653449	PgB01_g048_t04	-	3477	21	hypothetical protein	SL		N	N	N	8.5	7.5	4.2	2.7	1.1
PgB01	655684	679552	PgB01_g049_t01	-	4834	32	DNA topoisomerase 2	SL		N	Y	N	9	8.6	14.9	3.9	0.7
PgB01	655684	680075	PgB01_g049_t02	-	4754	32	DNA topoisomerase 2	SL		N	N	N	9.2	8.8	14.8	4	0.8
PgB01	655684	680076	PgB01_g049_t03	-	4755	32	DNA topoisomerase 2	SL		N	N	N	9.2	8.7	14.8	4	0.8
PgB01	655684	681948	PgB01_g049_t04	-	4931	34	DNA topoisomerase 2	SL		N	N	N	8.9	8.4	14.3	3.8	0.7
PgB01	655684	682445	PgB01_g049_t05	-	5396	34	DNA topoisomerase 2	SL		N	N	Y	8.1	7.7	13.1	3.5	0.7
PgB01	682730	697361	PgB01_g050_t01	+	3011	22	Protein lin-25			N	Y	Y	9.3	27.4	17.4	4.9	1.4
PgB01	684178	697361	PgB01_g050_t02	+	2898	21	Protein lin-25			N	N	N	9.5	27.3	16.4	4.8	1.3
PgB01	698016	702298	PgB01_g051_t01	-	2181	5	Homeobox protein ceh-37	SL		N	Y	Y	0	28.1	50.5	1	0.1
PgB01	698016	702298	PgB01_g051_t02	-	2154	5	Homeobox protein ceh-37	SL		N	N	N	0	27.3	49.2	1.1	0
PgB01	708728	713436	PgB01_g052_t01	-	1001	5	homeobox protein ceh-37			N	Y	Y	0.5	0.8	7.3	5.7	1.1
PgB01	735478	740370	PgB01_g053_t01	+	1218	5	hypothetical protein	SL		N	N	Y	11.7	35.1	15.4	7	5.1
PgB01	735605	740370	PgB01_g053_t02	+	805	6	hypothetical protein	SL		N	Y	N	17.5	50.5	23.2	10	7.7
PgB01	741850	752974	PgB01_g054_t01	+	5780	10	chromatin complexes subunit bap18		Telo	N	N	Y	15.2	12.7	5.3	1.4	0.6
PgB01	741850	752974	PgB01_g054_t02	+	5002	10	chromatin complexes subunit bap18		Telo	N	N	N	15.3	14.7	6.2	1.6	0.7
PgB01	741850	752974	PgB01_g054_t03	+	3665	12	chromatin complexes subunit bap18		Telo	N	Y	N	18	20	8.4	1.8	1
PgB01	746299	752974	PgB01_g054_t04	+	4199	5	hypothetical protein		Telo	N	N	N	19.8	0.3	1.1	0.4	0.3
PgB01	746299	752974	PgB01_g054_t05	+	2084	7	hypothetical protein		Telo	N	N	N	29.6	0.7	2.3	0	0.6
PgB01	753701	757144	PgB01_g055_t01	+	1236	4	60S ribosomal protein L10a	SL	Telo	N	N	Y	78.1	127.6	44.5	46.7	30.2
PgB01	753702	757144	PgB01_g055_t02	+	791	5	60S ribosomal protein L10a	SL	Telo	N	Y	N	121.3	198.7	69.4	72.2	47.2
PgB01	780000	829385	PgB01_g056_t01	+	4830	22	hypothetical protein	SL		N	N	Y	3.1	29.7	20.4	47.6	10.9
PgB01	780000	829385	PgB01_g056_t02	+	4824	22	hypothetical protein	SL		N	N	N	3.1	29.7	20.5	47.5	11
PgB01	780171	829385	PgB01_g056_t03	+	4351	23	hypothetical protein	SL		N	N	N	3.5	33.2	23	52.7	12.3
PgB01	780171	829385	PgB01_g056_t04	+	4357	23	hypothetical protein	SL		N	N	N	3.5	33.1	23	52.9	12.3
PgB01	820784	829385	PgB01_g056_t05	+	1675	11	hypothetical protein	SL		N	Y	N	3.4	57.2	43.1	43.6	9.8
PgB01	838232	858459	PgB01_g057_t01	+	2442	14	Acetylcholinesterase			N	Y	Y	0.2	0	0	0.2	8.8
PgB01	838264	858033	PgB01_g057_t02	+	2032	13	Acetylcholinesterase			N	N	N	0.1	0	0	0.3	8.5
PgB01	875616	888933	PgB01_g058_t01	+	1616	8	RecName: Full=cAMP-dependent protein kinase catalytic subunit; Short=PKA C	SL		N	Y	Y	7.1	40.7	34.9	8.4	22.7
PgB01	889519	892441	PgB01_g059_t01	-	842	4	39S ribosomal protein L23	SL		N	Y	Y	1.3	2.8	4.2	1	0.6
PgB01	896256	918535	PgB01_g060_t01	-	5156	31	UDP-glucose:glycoprotein glucosyltransferase 1	SL		N	Y	Y	12	15.2	6.5	8.5	3.6
PgB01	909937	918535	PgB01_g060_t02	-	1618	13	UDP-glucose:glycoprotein glucosyltransferase 1	SL		N	N	N	14.8	16.4	9.4	11.8	3.1
PgB01	915666	918535	PgB01_g060_t03	-	572	5	UDP-glucose:glycoprotein glucosyltransferase 1	SL		N	N	N	12.5	14.7	19.4	13.9	4.2
PgB01	923147	926263	PgB01_g061_t01	-	761	5	Syntaxin-1A			N	N	N	3.7	15.1	10	0	0.5
PgB01	923147	930541	PgB01_g061_t02	-	1074	8	Syntaxin-1A	SL		N	Y	Y	2.6	12.9	6.6	0	0.3
PgB01	931587	931982	PgB01_g062_t01	-	396	1	hypothetical protein			N	Y	Y	0	1	4.4	0.4	0.2
PgB01	940760	957883	PgB01_g063_t01	-	3607	18	putative exosome complex exonuclease rrp44			N	N	Y	6.7	12.7	7.9	2.5	0.6
PgB01	940760	957883	PgB01_g063_t02	-	3607	18	putative exosome complex exonuclease rrp44			N	Y	N	6.7	12.7	7.9	2.5	0.6
PgB01	941213	957883	PgB01_g063_t03	-	3418	18	putative exosome complex exonuclease rrp44			N	N	N	7.1	13.1	7.9	2.6	0.6
PgB01	941213	957883	PgB01_g063_t04	-	3418	18	putative exosome complex exonuclease rrp44			N	N	N	7.1	13.1	7.9	2.6	0.6
PgB01	953940	957883	PgB01_g063_t05	-	1107	4	Probable exosome complex exonuclease RRP44			N	N	N	5.9	12.6	8.2	1.7	1.2
PgB01	958826	966788	PgB01_g064_t01	-	1448	10	Importin-5		Telo	N	N	N	54.3	82	101.1	69.3	53.7
PgB01	958826	966792	PgB01_g064_t02	-	1452	11	Importin-5		Telo	N	N	N	54.5	81.9	100.8	69.2	53.7
PgB01	958826	966946	PgB01_g064_t03	-	1606	10	Importin-5		Telo	N	N	N	50.3	74.4	92.4	62.8	48.7
PgB01	958826	975421	PgB01_g064_t04	-	2926	23	Importin-5		Telo	N	N	N	66.3	89	107	76.8	57.2
PgB01	958826	979095	PgB01_g064_t05	-	3626	26	Importin-5	SL	Telo	N	N	N	74	100.4	114.1	80.5	62
PgB01	958826	979095	PgB01_g064_t06	-	3626	27	Importin-5	SL	Telo	N	N	N	74	100.4	114.1	80.5	62
PgB01	958826	979106	PgB01_g064_t07	-	3637	26	Importin-5	SL	Telo	N	Y	N	71.7	98.1	111.2	78.3	60.3
PgB01	958826	979107	PgB01_g064_t08	-	3638	25	Importin-5	SL	Telo	N	N	N	73.8	100.4	113.8	80.3	61.8
PgB01	958826	979130	PgB01_g064_t09	-	3661	26	Importin-5	SL	Telo	N	N	N	73.4	100	113.1	79.9	61.5
PgB01	958826	980643	PgB01_g064_t10	-	3668	26	Importin-5	SL	Telo	N	N	Y	73.4	99.6	112.8	79.7	61.3
PgB01	958826	980643	PgB01_g064_t11	-	3668	27	Importin-5	SL	Telo	N	N	N	73.4	99.6	112.8	79.7	61.3
PgB01	958826	980643	PgB01_g064_t12	-	3668	26	Importin-5	SL	Telo	N	N	N	73.4	99.7	112.8	79.7	61.3
PgB01	973518	975419	PgB01_g064_t13	-	330	4	Importin-5			N	N	N	50.8	70.5	109.6	65.1	53.8
PgB01	973518	980642	PgB01_g064_t14	-	1073	8	Importin-5	SL	Telo	N	N	N	85.6	119.9	127.5	83.8	70.1
PgB01	977784	979100	PgB01_g064_t15	-	267	2	Importin-5	SL	Telo	N	N	N	74.4	124.8	123.8	80	63.6
PgB01	975032	976507	PgB01_g065_t01	+	575	4	Importin-5			N	Y	Y	13.3	14.5	16.3	12.8	9.7
PgB01	985836	994920	PgB01_g066_t01	-	1720	13	px domain-containing protein	SL		N	N	N	4.3	16.3	6.3	3.4	3
PgB01	985836	994927	PgB01_g066_t02	-	1730	13	px domain-containing protein	SL		N	N	Y	4.3	16.2	6.3	3.4	3
PgB01	985836	994927	PgB01_g066_t03	-	1730	13	px domain-containing protein	SL		N	Y	N	4.3	16.2	6.3	3.4	3
PgB01	985836	994927	PgB01_g066_t04	-	1727	13	px domain-containing protein	SL		N	N	N	4.3	16.3	6.3	3.4	3
PgB01	992113	994927	PgB01_g066_t05	-	560	5	px domain-containing protein	SL		N	N	N	3.6	19.6	2.4	0	2.2
PgB01	998604	999998	PgB01_g067_t01	-	389	2	gem-associated protein 7	SL		N	N	N	3.3	13.2	7.8	7.2	0.7
PgB01	998604	1001451	PgB01_g067_t02	-	473	2	gem-associated protein 7	SL		N	Y	Y	5.5	11.8	11.5	7.4	2.2
PgB01	1003333	1007769	PgB01_g068_t01	-	745	5	60S ribosomal protein L23a	SL		N	Y	N	265.8	619.3	229.6	291.2	266.1
PgB01	1003333	1010535	PgB01_g068_t02	-	1403	7	Neuroligin-4, Y-linked	SL		N	N	N	142.9	334	129.5	158.2	141.9
PgB01	1003333	1015004	PgB01_g068_t03	-	1912	12	Neuroligin-4, Y-linked	SL		N	N	N	109.3	258.7	113.6	118.1	105.2
PgB01	1003333	1015015	PgB01_g068_t04	-	2402	11	Neuroligin-4, Y-linked	SL		N	N	N	87.7	207.9	91.9	95.3	84
PgB01	1003333	1021838	PgB01_g068_t05	-	3470	16	Neuroligin-4, Y-linked	SL		N	N	N	66.5	162.6	69.5	70	59.5
PgB01	1003333	1022036	PgB01_g068_t06	-	3189	17	Neuroligin-4, Y-linked	SL		N	N	N	72	175.6	74.5	75.1	64.5
PgB01	1003333	1022036	PgB01_g068_t07	-	3668	16	Neuroligin-4, Y-linked	SL		N	N	Y	63	154	65.8	66.2	56.3
PgB01	1003333	1022036	PgB01_g068_t08	-	3668	16	Neuroligin-4, Y-linked	SL		N	N	N	63	154	65.8	66.2	56.3
PgB01	1003333	1022036	PgB01_g068_t09	-	3441	17	Neuroligin-4, Y-linked	SL		N	N	N	67	163.2	69.6	70.5	59.9
PgB01	1003333	1022036	PgB01_g068_t10	-	3441	17	Neuroligin-4, Y-linked	SL		N	N	N	67	163.2	69.6	70.5	59.9
PgB01	1003333	1022036	PgB01_g068_t11	-	3271	17	Neuroligin-4, Y-linked	SL		N	N	N	70.3	171.3	73.2	73.5	62.9
PgB01	1027330	1030400	PgB01_g069_t01	-	2691	2	hypothetical protein			N	Y	N	9.3	0	0	0.4	0.1
PgB01	1027330	1030400	PgB01_g069_t02	-	2703	2	hypothetical protein			N	N	Y	8.8	0	0	0.4	0
PgB01	1027330	1030400	PgB01_g069_t03	-	2323	3	hypothetical protein			N	N	N	9.8	0	0	0.5	0
PgB01	1032183	1036781	PgB01_g070_t01	-	3547	3	Tyrosine-protein kinase transforming protein Fps		Telo	N	N	N	91.8	0	0.1	1.8	0.7
PgB01	1032183	1036781	PgB01_g070_t02	-	3550	3	Tyrosine-protein kinase transforming protein Fps		Telo	N	N	N	91.7	0	0.1	1.8	0.7
PgB01	1032183	1042640	PgB01_g070_t03	-	3184	12	tyrosine-protein kinase frk		Telo	N	N	N	217.5	0	0.5	5.5	1.5
PgB01	1032183	1043195	PgB01_g070_t04	-	3734	11	tyrosine-protein kinase frk		Telo	N	N	Y	182.6	0	0.4	4.7	1.3
PgB01	1032183	1043205	PgB01_g070_t05	-	2886	13	tyrosine-protein kinase frk		Telo	N	N	N	241	0	0.5	5.8	1.8
PgB01	1032183	1043206	PgB01_g070_t06	-	2593	14	tyrosine-protein kinase frk		Telo	N	Y	N	243	0	0.5	5.9	1.7
PgB01	1037564	1042638	PgB01_g070_t07	-	1096	7	tyrosine-protein kinase frk			N	N	N	243.9	0.1	0.9	7	1.7
PgB01	1032192	1034117	PgB01_g071_t01	+	1707	2	hypothetical protein		Telo	N	Y	Y	47.7	0	0	0.9	0.4
PgB01	1045505	1055100	PgB01_g072_t01	-	1781	12	pyruvate kinase muscle isozyme			N	Y	Y	1.7	1.3	0.1	2.1	1.4
PgB01	1046371	1055100	PgB01_g072_t02	-	1407	11	pyruvate kinase muscle isozyme			N	N	N	2.1	1.4	0.1	1.9	1.8
PgB01	1062673	1070352	PgB01_g073_t01	-	1758	11	an1-like zinc finger family protein		Telo	N	Y	Y	134.6	0	1.6	1.9	0.5
PgB01	1073052	1086175	PgB01_g074_t01	-	2405	18	brct domain-containing protein			N	Y	Y	0.8	1	0.1	0.4	0.4
PgB01	1092751	1099572	PgB01_g075_t01	-	1411	8	Platelet-activating factor acetylhydrolase 2			N	N	Y	20	18.3	12.7	23.9	4.8
PgB01	1096560	1099556	PgB01_g075_t02	-	486	3	Platelet-activating factor acetylhydrolase 2			N	Y	N	27.6	27.1	11.2	33.3	5.1
PgB01	1108426	1113742	PgB01_g076_t01	-	1282	8	ribonuclease p protein 1			N	N	N	1.6	7.5	2.2	2.4	1.4
PgB01	1108426	1113794	PgB01_g076_t02	-	1334	7	ribonuclease p protein 1			N	Y	Y	1.6	7.2	2.1	2.3	1.4
PgB01	1116641	1131155	PgB01_g077_t01	-	3138	17	Fumarylacetoacetase	SL	Telo	N	N	N	10.3	55.1	14.8	1.9	1.3
PgB01	1116641	1131157	PgB01_g077_t02	-	3116	17	Fumarylacetoacetase	SL	Telo	N	N	N	10.4	57	15	1.9	1.3
PgB01	1116641	1131157	PgB01_g077_t03	-	3116	17	Fumarylacetoacetase	SL	Telo	N	N	N	10.4	57	15	1.9	1.3
PgB01	1116641	1131157	PgB01_g077_t04	-	3189	18	Fumarylacetoacetase	SL	Telo	N	N	Y	10.1	55.6	14.7	1.8	1.3
PgB01	1122706	1131157	PgB01_g077_t05	-	2028	12	Fumarylacetoacetase	SL	Telo	N	Y	N	14.6	82.1	19.9	2.4	1.6
PgB01	1132514	1140004	PgB01_g078_t01	-	1620	10	NudC domain-containing protein 1			N	N	N	7	17	13.1	9.3	2.8
PgB01	1132514	1141563	PgB01_g078_t02	-	1969	11	NudC domain-containing protein 1			N	Y	Y	8.2	23.6	15.6	9.3	3.4
PgB01	1143695	1175775	PgB01_g079_t01	-	3667	22	Peroxisome biogenesis factor 1	SL	Telo	N	Y	N	7.9	25.8	17.5	9	4.8
PgB01	1143695	1175791	PgB01_g079_t02	-	4150	21	Peroxisome biogenesis factor 1	SL	Telo	N	N	Y	7.1	23.2	15.9	8.3	4.4
PgB01	1166595	1172694	PgB01_g079_t03	-	1307	10	Peroxisome biogenesis factor 1			N	N	N	10.2	28.2	15.9	14.3	6.2
PgB01	1188942	1189405	PgB01_g080_t01	.	464	1	hypothetical protein			N	Y	Y	0	0	3.3	0	0
PgB01	1191110	1211913	PgB01_g081_t01	+	4106	26	Arf-GAP with SH3 domain, ANK repeat and PH domain-containing protein 1			N	Y	Y	19.2	21	21.6	13.4	3.4
PgB01	1192788	1211913	PgB01_g081_t02	+	4082	26	Arf-GAP with SH3 domain, ANK repeat and PH domain-containing protein 1			N	N	N	19.2	21.1	21.8	13.5	3.4
PgB01	1196731	1211913	PgB01_g081_t03	+	3336	21	Arf-GAP with SH3 domain, ANK repeat and PH domain-containing protein 1			N	N	N	19.3	22.9	24	14	3.8
PgB01	1216772	1222420	PgB01_g082_t01	+	765	7	DNA polymerase zeta catalytic subunit	SL		N	Y	N	3	14.2	2.1	4.1	0.7
PgB01	1216772	1228823	PgB01_g082_t02	+	2644	16	DNA polymerase zeta catalytic subunit	SL		N	N	N	2.5	10.9	5.1	3.6	0.9
PgB01	1216772	1228823	PgB01_g082_t03	+	2644	17	DNA polymerase zeta catalytic subunit	SL		N	N	N	2.5	10.9	5.1	3.6	0.9
PgB01	1216772	1228823	PgB01_g082_t04	+	2644	17	DNA polymerase zeta catalytic subunit	SL		N	N	N	2.5	10.9	5.1	3.6	0.9
PgB01	1216772	1228823	PgB01_g082_t05	+	2644	18	DNA polymerase zeta catalytic subunit	SL		N	N	N	2.5	10.9	5.1	3.6	0.9
PgB01	1216772	1240732	PgB01_g082_t06	+	4913	34	DNA polymerase zeta catalytic subunit	SL		N	N	Y	2.7	11.4	6.7	4.4	1
PgB01	1216772	1240732	PgB01_g082_t07	+	4913	34	DNA polymerase zeta catalytic subunit	SL		N	N	N	2.7	11.4	6.7	4.4	1
PgB01	1216772	1240732	PgB01_g082_t08	+	4913	35	DNA polymerase zeta catalytic subunit	SL		N	N	N	2.7	11.4	6.7	4.4	1
PgB01	1216777	1228823	PgB01_g082_t09	+	2564	16	DNA polymerase zeta catalytic subunit	SL		N	N	N	2.3	10.9	5	3.5	0.9
PgB01	1222235	1228823	PgB01_g082_t10	+	1792	10	DNA polymerase zeta catalytic subunit			N	N	N	1.9	9.1	5.7	2.7	0.8
PgB01	1229251	1240732	PgB01_g082_t11	+	2674	18	DNA polymerase zeta catalytic subunit			N	N	N	2.5	9	6.5	4.5	0.9
PgB01	1236093	1238709	PgB01_g082_t12	+	804	5	DNA polymerase zeta catalytic subunit			N	N	N	1.4	8.2	7.1	5	0.9
PgB01	1242064	1244849	PgB01_g083_t01	-	940	4	dna polymerase zeta catalytic subunit		Telo	N	Y	Y	39.3	247.7	82.7	4	8
PgB01	1252188	1290824	PgB01_g084_t01	+	1832	10	methyltransferase-like protein 13			N	N	N	67	0.7	0	0.5	0.5
PgB01	1252206	1287422	PgB01_g084_t02	+	1001	8	methyltransferase-like protein 13			N	N	N	77.9	0.3	0	0.6	0.7
PgB01	1253282	1290824	PgB01_g084_t03	+	1662	9	methyltransferase-like protein 13			N	N	N	66.7	0.7	0	0.6	0.5
PgB01	1266586	1290824	PgB01_g084_t04	+	1853	10	methyltransferase-like protein 13			N	Y	Y	66.2	0.6	0	0.5	0.5
PgB01	1268970	1290824	PgB01_g084_t05	+	1554	9	methyltransferase-like protein 13			N	N	N	64.9	0.7	0	0.6	0.4
PgB01	1280674	1290824	PgB01_g084_t06	+	1852	11	methyltransferase-like protein 13			N	N	N	66.3	0.6	0	0.5	0.5
PgB01	1287988	1289117	PgB01_g084_t07	+	86	2	hypothetical protein			N	N	N	0	0	28.3	0	0
PgB01	1311360	1313945	PgB01_g085_t01	-	1156	4	hypothetical protein	SL		N	Y	Y	0	0	1	2.2	15.4
PgB01	1327498	1336246	PgB01_g086_t01	+	2133	15	Cell division protein kinase 8	SL	Telo	N	Y	Y	15.2	43.3	17.7	7.9	7.2
PgB01	1338660	1352063	PgB01_g087_t01	+	945	5	hypothetical protein			N	Y	Y	0	7.2	2.7	0	1.2
PgB01	1350769	1352063	PgB01_g087_t02	+	502	2	hypothetical protein			N	N	N	0	7	2.5	0	1
PgB01	1356583	1359481	PgB01_g088_t01	+	879	5	hypothetical protein			N	Y	Y	0.4	0	0	0	0.5
PgB01	1361513	1383172	PgB01_g089_t01	-	4101	31	multidrug resistance protein pgp-3	SL		N	Y	Y	0.8	0.2	2	12.8	5.5
PgB01	1393009	1403190	PgB01_g090_t01	+	6218	7	hypothetical protein	SL		N	N	N	4.3	1.1	2.1	7.4	3.5
PgB01	1393009	1404625	PgB01_g090_t02	+	6418	8	hypothetical protein	SL		N	N	N	3.7	0.9	1.3	6.2	2.7
PgB01	1393009	1404625	PgB01_g090_t03	+	7470	7	hypothetical protein	SL		N	N	Y	3.5	0.8	1.1	4.9	2.2
PgB01	1397454	1404625	PgB01_g090_t04	+	1947	8	hypothetical protein	SL		N	N	N	11.4	3	3.5	10.9	6
PgB01	1397709	1404625	PgB01_g090_t05	+	1673	8	hypothetical protein	SL		N	Y	N	13.3	3.5	4.1	12.5	6.8
PgB01	1401532	1403190	PgB01_g090_t06	+	518	3	hypothetical protein	SL		N	N	N	21.2	8.9	19.1	11.8	10.9
PgB01	1393903	1395264	PgB01_g091_t01	-	891	2	hypothetical protein	SL		N	N	N	0	0	0.2	4	3
PgB01	1393903	1396176	PgB01_g091_t02	-	1715	2	hypothetical protein	SL		N	N	N	0.1	0	0.3	6.2	2.6
PgB01	1393903	1396470	PgB01_g091_t03	-	1210	3	hypothetical protein	SL		N	Y	N	0.3	0	0.7	11.3	5.5
PgB01	1393903	1397257	PgB01_g091_t04	-	2556	2	hypothetical protein	SL		N	N	Y	0.3	0	0.7	6.6	2.8
PgB01	1393903	1397520	PgB01_g091_t05	-	1454	2	hypothetical protein	SL		N	N	N	0	0	0.4	8.8	4.2
PgB01	1413515	1426685	PgB01_g092_t01	+	1478	6	hypothetical protein		Telo	N	Y	Y	0	0.2	3.1	0.7	12.6
PgB01	1434212	1434593	PgB01_g093_t01	.	382	1	hypothetical protein			N	Y	Y	0.5	2.3	0	0	0
PgB01	1464630	1477360	PgB01_g094_t01	+	1852	10	Zinc finger protein 620	SL		N	Y	Y	1.2	1.3	5.2	0.4	3.9
PgB01	1465734	1465990	PgB01_g094_t02	+	257	1	hypothetical protein			N	N	N	0	0	0	0	1.7
PgB01	1482908	1487301	PgB01_g095_t01	-	1452	7	hypothetical protein		Telo	N	N	Y	64.4	0	4	0.4	0.5
PgB01	1482908	1487301	PgB01_g095_t02	-	1061	8	hypothetical protein		Telo	N	Y	N	83.3	0	3.7	0.5	0.6
PgB01	1489952	1494134	PgB01_g096_t01	+	3269	3	Small heat shock protein OV25-1	SL		N	N	N	12.7	13.1	33	0.5	0.2
PgB01	1490062	1499582	PgB01_g096_t02	+	3111	4	Small heat shock protein OV25-1	SL		N	Y	N	12.8	13.6	34.5	0.6	0.2
PgB01	1490068	1494134	PgB01_g096_t03	+	3628	2	Small heat shock protein OV25-1	SL		N	N	Y	9.3	6.9	16.6	0.3	0.2
PgB01	1490582	1500063	PgB01_g097_t01	-	1265	3	Hyphally regulated cell wall protein 3			N	N	N	41.2	11.6	40.9	0.6	1.1
PgB01	1490582	1500063	PgB01_g097_t02	-	2938	3	Small heat shock protein OV25-1			N	N	N	23.7	14.4	36.9	0.8	0.5
PgB01	1490582	1500063	PgB01_g097_t03	-	5426	5	Hyphally regulated cell wall protein 3			N	Y	Y	19.5	1.2	3.5	0.3	0.3
PgB01	1490582	1500063	PgB01_g097_t04	-	1790	6	Hyphally regulated cell wall protein 3			N	N	N	38.7	3.6	10.3	1.1	1.1
PgB01	1490582	1500063	PgB01_g097_t05	-	3463	6	Hyphally regulated cell wall protein 3			N	N	N	21.2	6.2	16.5	0.6	0.5
PgB01	1534680	1539697	PgB01_g098_t01	+	1301	8	two pore potassium channel protein sup-9	SL		N	Y	Y	0	0.8	0.3	1.8	6.4
PgB01	1551063	1555737	PgB01_g099_t01	-	1300	8	two pore potassium channel protein sup-9		Telo	N	Y	Y	0.2	1.2	1.5	3.2	7
PgB01	1561883	1579616	PgB01_g100_t01	-	2263	5	Two pore potassium channel protein sup-9			N	Y	N	0.2	3	0	0.7	2.4
PgB01	1575338	1579616	PgB01_g100_t02	-	2287	3	Two pore potassium channel protein sup-9			N	N	Y	0.2	2.1	0	0.6	1.6
PgB01	1624742	1627699	PgB01_g101_t01	+	749	5	Vesicle-trafficking protein SEC22b	SL		N	Y	Y	3	13	4.8	3	1.8
PgB01	1628897	1640139	PgB01_g102_t01	+	1718	14	Glutathione reductase	SL		N	Y	Y	9.7	24.5	19	7	13.5
PgB01	1630984	1637345	PgB01_g102_t02	+	1134	10	glutathione	SL		N	N	N	12.1	32.9	17.2	8.5	15.6
PgB01	1641761	1651579	PgB01_g103_t01	+	1965	11	serine threonine-protein phosphatase pp1-beta catalytic subunit	SL		N	Y	N	152.2	1.6	3.5	1.9	1.2
PgB01	1642311	1651579	PgB01_g103_t02	+	2432	10	serine threonine-protein phosphatase pp1-beta catalytic subunit	SL		N	N	N	123.5	1.7	2.9	1.6	1
PgB01	1642750	1651579	PgB01_g103_t03	+	2438	9	serine threonine-protein phosphatase pp1-beta catalytic subunit	SL		N	N	Y	122.6	1.1	2.9	1.4	0.9
PgB01	1654690	1659691	PgB01_g104_t01	-	2196	6	palmitoyltransferase zdhhc15			N	Y	Y	16	0	0	0	0.1
PgB01	1654690	1659691	PgB01_g104_t02	-	1321	7	palmitoyltransferase zdhhc15			N	N	N	24	0	0	0.5	0.2
PgB01	1655219	1658596	PgB01_g104_t03	-	955	5	palmitoyltransferase zdhhc15			N	N	N	22.5	0	0	0	0.2
PgB01	1655219	1659691	PgB01_g104_t04	-	1126	6	palmitoyltransferase zdhhc15			N	N	N	26.5	0	0	0.6	0.2
PgB01	1661162	1666005	PgB01_g105_t01	+	977	8	Nuclear transcription factor Y subunit gamma	SL		N	Y	N	2.5	18	12.9	4	0.6
PgB01	1661268	1666005	PgB01_g105_t02	+	1253	7	Nuclear transcription factor Y subunit gamma	SL		N	N	Y	2	14.2	10	3.1	0.5
PgB01	1664491	1666005	PgB01_g105_t03	+	619	3	Nuclear transcription factor Y subunit gamma			N	N	N	1.3	4.5	1.5	1.6	0.3
PgB01	1667388	1673264	PgB01_g106_t01	-	2441	6	dihydroflavonol-4-reductase	SL		N	N	Y	1.6	4.6	5.9	0.2	7.2
PgB01	1667388	1674173	PgB01_g106_t02	-	1560	8	dihydroflavonol-4-reductase	SL		N	Y	N	2	4	8.3	0.2	10.1
PgB01	1668084	1670301	PgB01_g107_t01	+	910	2	dihydroflavonol-4-reductase	SL		N	Y	Y	3	25	7.4	1.3	5.3
PgB01	1675689	1676999	PgB01_g108_t01	+	312	2	hypothetical protein		Telo	N	Y	Y	156.8	0	0	3.8	1.7
PgB01	1681308	1695751	PgB01_g109_t01	-	2392	17	Remodeling and spacing factor 1	SL		N	N	N	3.9	6.9	4.9	3.6	2.1
PgB01	1681308	1695917	PgB01_g109_t02	-	2687	18	Remodeling and spacing factor 1	SL		N	N	N	3.7	6.6	5.3	4.2	2.1
PgB01	1681308	1708424	PgB01_g109_t03	-	4038	29	Remodeling and spacing factor 1	SL		N	N	N	5.4	7.8	7.8	5.3	1.9
PgB01	1681308	1708484	PgB01_g109_t04	-	4111	29	Remodeling and spacing factor 1	SL		N	N	Y	5.5	7.8	7.6	5.6	1.9
PgB01	1681308	1708558	PgB01_g109_t05	-	4056	28	Remodeling and spacing factor 1	SL		N	N	N	5.4	7.6	7.5	5.4	1.8
PgB01	1684932	1708516	PgB01_g109_t06	-	2855	22	Remodeling and spacing factor 1	SL		N	Y	N	5.8	8.9	7.8	5	1.8
PgB01	1719050	1719393	PgB01_g110_t01	.	344	1	hypothetical protein			N	Y	Y	1.4	2.1	10.2	0	0
PgB01	1722141	1725996	PgB01_g111_t01	+	734	5	Ras-related C3 botulinum toxin substrate 1			N	N	N	2	16.8	17.8	4.4	2.5
PgB01	1722141	1726296	PgB01_g111_t02	+	903	5	Ras-related C3 botulinum toxin substrate 1			N	Y	Y	1.6	16	15.1	3.6	2.3
PgB01	1729161	1735788	PgB01_g112_t01	+	2825	8	protein rrnad1	SL		N	N	N	4.7	16.6	8.7	3.8	2.9
PgB01	1729161	1735788	PgB01_g112_t02	+	2842	8	protein rrnad1	SL		N	N	Y	4.4	16.2	8.4	3.6	2.8
PgB01	1729161	1735788	PgB01_g112_t03	+	2582	9	protein rrnad1	SL		N	N	N	5.1	18.2	8.9	3.9	3
PgB01	1729183	1735788	PgB01_g112_t04	+	2577	9	protein rrnad1	SL		N	N	N	4.9	17.8	8.7	3.6	2.9
PgB01	1729296	1735788	PgB01_g112_t05	+	2488	9	protein rrnad1	SL		N	Y	N	5.2	18.2	9.3	4	3
PgB01	1729944	1735788	PgB01_g112_t06	+	1777	8	protein rrnad1	SL		N	N	N	5.1	20.4	9.7	4.6	3.3
PgB01	1737987	1744531	PgB01_g113_t01	-	1073	7	serine threonine-protein phosphatase pp2a			N	Y	Y	12.7	15	13.8	10.9	2.2
PgB01	1748315	1753320	PgB01_g114_t01	-	1080	7	UPF0585 protein C16orf13 homolog A	SL	Telo	N	Y	Y	16.7	0.3	0	1.6	1.9
PgB01	1753717	1757866	PgB01_g115_t01	-	948	5	UPF0585 protein C16orf13 homolog A	SL		N	Y	Y	12.7	39	31.2	12.5	9.7
PgB01	1760589	1776276	PgB01_g116_t01	+	3349	24	Zinc finger protein sdc-1	SL		N	Y	Y	5.5	4.8	6.4	5	0.8
PgB01	1760899	1776276	PgB01_g116_t02	+	3328	24	Zinc finger protein sdc-1	SL		N	N	N	5.5	4.8	6.4	5.1	0.8
PgB01	1761470	1776276	PgB01_g116_t03	+	3146	23	Zinc finger protein sdc-1	SL		N	N	N	5.2	4.4	6.7	5.3	0.8
PgB01	1777615	1779082	PgB01_g117_t01	+	600	3	histone-fold protein chrac subunit	SL		N	Y	Y	2.7	11	0.7	0.1	0.4
PgB01	1790901	1793797	PgB01_g118_t01	-	425	6	baif -transferase family protein c7orf10-like protein			N	N	N	8.7	10.4	10.7	1.5	6.5
PgB01	1791088	1795675	PgB01_g118_t02	-	2378	6	baif -transferase family protein c7orf10-like protein			N	N	Y	8.5	7.1	4.3	0.3	2.9
PgB01	1791088	1797882	PgB01_g118_t03	-	1972	10	baif -transferase family protein c7orf10-like protein			N	Y	N	14	16.5	11.5	0.8	5.9
PgB01	1802233	1809199	PgB01_g119_t01	-	2289	10	serine threonine-protein phosphatase pp1-gamma catalytic subunit	SL	Telo	N	N	N	170.4	244.9	46.9	2.7	2.2
PgB01	1802233	1809247	PgB01_g119_t02	-	2184	10	serine threonine-protein phosphatase pp1-gamma catalytic subunit	SL	Telo	N	N	N	178.3	256.6	49.2	2.8	2.3
PgB01	1802233	1811590	PgB01_g119_t03	-	2475	10	serine threonine-protein phosphatase pp1-gamma catalytic subunit	SL	Telo	N	Y	Y	157.2	228.6	44	2.5	2
PgB01	1814743	1826972	PgB01_g120_t01	-	2145	14	RCC1 and BTB domain-containing protein 1	SL		N	Y	Y	1.3	0.6	0.7	0	4
PgB01	1864096	1897137	PgB01_g121_t01	-	7073	42	proteasome activator complex subunit 4	SL		N	N	N	129.3	2	1.1	1.7	1
PgB01	1864096	1897144	PgB01_g121_t02	-	6703	43	Proteasome activator complex subunit 4	SL		N	Y	N	136	2.1	1.1	1.9	1.1
PgB01	1864096	1897171	PgB01_g121_t03	-	6841	43	Proteasome activator complex subunit 4	SL		N	N	N	132.6	2.1	1.1	1.9	1
PgB01	1864096	1897175	PgB01_g121_t04	-	6492	45	Proteasome activator complex subunit 4	SL		N	N	N	140.3	2.2	1.2	2.1	1.1
PgB01	1864096	1897182	PgB01_g121_t05	-	6499	44	Proteasome activator complex subunit 4	SL		N	N	N	140.1	2.2	1.2	2.1	1.1
PgB01	1864096	1897182	PgB01_g121_t06	-	7650	42	proteasome activator complex subunit 4	SL		N	N	Y	119.5	1.9	0.8	1.6	0.9
PgB01	1899300	1904837	PgB01_g122_t01	-	4113	3	hypothetical protein	SL		N	N	N	7.2	0	0	0.2	0.1
PgB01	1899300	1904837	PgB01_g122_t02	-	4900	3	hypothetical protein	SL		N	N	Y	6.7	0	0	0.2	0.1
PgB01	1899300	1904837	PgB01_g122_t03	-	2761	6	hypothetical protein	SL		N	N	N	9.1	0	0	0.2	0.1
PgB01	1899300	1904837	PgB01_g122_t04	-	2243	7	hypothetical protein	SL		N	N	N	10.8	0	0	0.2	0.2
PgB01	1899300	1904837	PgB01_g122_t05	-	2957	6	hypothetical protein	SL		N	Y	N	9.5	0	0	0.3	0.1
PgB01	1899300	1904837	PgB01_g122_t06	-	2787	6	hypothetical protein	SL		N	N	N	8.6	0	0	0.2	0.1
PgB01	1901875	1904822	PgB01_g122_t07	-	1906	3	hypothetical protein	SL		N	N	N	10.6	0	0	0.3	0
PgB01	1918413	1927271	PgB01_g123_t01	-	2002	10	hypothetical protein			N	Y	Y	0	3.4	1.9	0	0.1
PgB01	1935822	1938267	PgB01_g124_t01	+	635	4	15 kDa selenoprotein	SL		N	Y	Y	5.3	44.8	27.2	13.6	12
PgB01	1940224	1950039	PgB01_g125_t01	+	1981	9	nadph-dependent methylglyoxal reductase grp2	SL		N	Y	Y	3.8	9.9	13.2	10.4	9.9
PgB01	1940628	1950039	PgB01_g125_t02	+	1561	9	nadph-dependent methylglyoxal reductase grp2	SL		N	N	N	4.7	11.3	14	13.1	12.3
PgB01	1954235	1955059	PgB01_g126_t01	-	269	2	hypothetical protein			N	N	N	1.4	6.8	8.1	0	3.2
PgB01	1954235	1958384	PgB01_g126_t02	-	562	4	Protein phosphatase 1 regulatory subunit 11			N	N	N	4	8.1	8.1	8.7	5.5
PgB01	1954235	1958384	PgB01_g126_t03	-	650	4	Protein phosphatase 1 regulatory subunit 11			N	N	Y	3.5	7	7	7.6	4.8
PgB01	1954235	1958384	PgB01_g126_t04	-	562	4	Protein phosphatase 1 regulatory subunit 11			N	Y	N	4	8.1	8.1	8.7	5.5
PgB01	1999710	2005283	PgB01_g127_t01	+	813	5	hypothetical protein			N	Y	Y	1.1	2.2	1.1	1.9	1
PgB01	2031328	2068503	PgB01_g128_t01	+	2342	12	hypothetical protein			N	N	N	1.7	5.5	8.8	23.6	6.2
PgB01	2031328	2068503	PgB01_g128_t02	+	2342	12	hypothetical protein			N	Y	N	1.6	5.5	8.8	23.5	6.1
PgB01	2033403	2068503	PgB01_g128_t03	+	2779	11	hypothetical protein			N	N	Y	1.4	4.5	7.5	20.6	4.8
PgB01	2033473	2067176	PgB01_g128_t04	+	2431	10	hypothetical protein			N	N	N	1.5	4.8	7.7	23.6	5.2
PgB01	2033724	2034947	PgB01_g128_t05	+	1224	1	Nuclear receptor coactivator 2			N	N	N	1.1	1	1.4	3.2	1.8
PgB01	2043772	2050482	PgB01_g129_t01	-	5295	2	Nuclear receptor coactivator 2			N	Y	Y	0.4	0.8	1.2	2.9	1.1
PgB01	2043772	2050482	PgB01_g129_t02	-	3931	3	Nuclear receptor coactivator 2			N	N	N	0.6	1	1.2	3.1	1.6
PgB01	2073643	2079582	PgB01_g130_t01	+	1542	7	hypothetical protein	SL		N	Y	Y	8.6	33.8	21.1	11.3	4.4
PgB01	2108619	2114824	PgB01_g131_t01	+	777	4	Uncharacterized protein B0302.5			N	Y	Y	0	3.6	4.2	0	3.1
PgB01	2117178	2117589	PgB01_g132_t01	.	412	1	hypothetical protein			N	Y	Y	2.8	0	0	0	0
PgB01	2141090	2142420	PgB01_g133_t01	+	1331	1	hypothetical protein			N	N	N	0.4	0.6	4.3	0.3	1.1
PgB01	2141090	2151683	PgB01_g133_t02	+	1866	7	Protein max	SL		N	N	N	6.1	35	33.8	22.2	9.1
PgB01	2142877	2151683	PgB01_g133_t03	+	1053	7	Protein max	SL		N	N	N	10.2	61.5	59.8	39.2	15.1
PgB01	2143103	2151683	PgB01_g133_t04	+	1053	7	Protein max	SL		N	Y	N	10.2	61.5	59.8	39.2	15.1
PgB01	2145251	2151683	PgB01_g133_t05	+	1914	6	Protein max	SL		N	N	Y	5.6	34.2	33.8	21.5	9.1
PgB01	2146110	2149390	PgB01_g133_t06	+	392	3	Protein max	SL		N	N	N	12.7	66	56.1	22.9	15.3
PgB01	2160581	2161112	PgB01_g134_t01	-	532	1	hypothetical protein			N	N	N	2.3	4.7	2.4	0.9	2
PgB01	2160581	2165154	PgB01_g134_t02	-	1068	6	NAD-dependent ADP-ribosyltransferase sirtuin-4			N	Y	Y	6.2	18.5	6	7.2	5.9
PgB01	2166674	2172444	PgB01_g135_t01	+	1323	8	Cap-specific mRNA (nucleoside-2'-O-)-methyltransferase 1	SL		N	N	N	5.3	12.2	11	7.2	2.2
PgB01	2166674	2178132	PgB01_g135_t02	+	2693	15	Cap-specific mRNA (nucleoside-2'-O-)-methyltransferase 1	SL		N	N	N	6.5	12.1	11.1	5.2	1.5
PgB01	2166674	2180380	PgB01_g135_t03	+	3161	18	Cap-specific mRNA (nucleoside-2'-O-)-methyltransferase 1	SL		N	Y	Y	6.2	10.6	9.1	4.4	1.4
PgB01	2173696	2179852	PgB01_g135_t04	+	1774	7	Cap-specific mRNA (nucleoside-2'-O-)-methyltransferase 1			N	N	N	5.3	8.4	7.6	2.8	0.9
PgB01	2188535	2189284	PgB01_g136_t01	-	750	1	hypothetical protein			N	Y	Y	0	0	0	0	0
PgB01	2191706	2202498	PgB01_g137_t01	+	2092	12	fragile x mental retardation protein 1-like protein		Telo	N	N	N	39.4	28.4	46.5	59.2	34.6
PgB01	2191706	2202498	PgB01_g137_t02	+	2092	11	fragile x mental retardation protein 1-like protein		Telo	N	N	N	39.4	28.4	46.5	59.2	34.6
PgB01	2191706	2202498	PgB01_g137_t03	+	2101	11	Fragile X mental retardation protein 1		Telo	N	N	Y	39.3	28.3	46.3	59	34.5
PgB01	2191708	2202498	PgB01_g137_t04	+	2099	12	Fragile X mental retardation protein 1		Telo	N	N	N	39.3	28.2	45.4	59.1	34.5
PgB01	2191708	2202498	PgB01_g137_t05	+	2099	12	Fragile X mental retardation protein 1		Telo	N	Y	N	39.3	28.2	45.4	59.1	34.5
PgB01	2205225	2215792	PgB01_g138_t01	+	1979	10	Run domain Beclin-1 interacting and cystein-rich containing protein			N	N	Y	5.2	7.3	6.1	2.4	0.9
PgB01	2205393	2215792	PgB01_g138_t02	+	1811	10	Run domain Beclin-1 interacting and cystein-rich containing protein			N	N	N	5.7	8	6.6	2.1	1
PgB01	2205393	2215792	PgB01_g138_t03	+	1811	11	Run domain Beclin-1 interacting and cystein-rich containing protein			N	N	N	5.7	8	6.6	2.1	1
PgB01	2208652	2211740	PgB01_g138_t04	+	1127	4	Run domain Beclin-1 interacting and cystein-rich containing protein			N	Y	N	5	7.2	5.1	3.4	1.1
PgB01	2229101	2241983	PgB01_g139_t01	+	1761	11	nuclear hormone receptor family member nhr-121	SL		N	Y	N	3.7	25.6	17.1	5.4	0.5
PgB01	2229101	2241983	PgB01_g139_t02	+	1765	11	nuclear hormone receptor family member nhr-121	SL		N	N	Y	3.7	25.5	17.1	5.4	0.5
PgB01	2229112	2241139	PgB01_g139_t03	+	1475	10	nuclear hormone receptor family member nhr-121	SL		N	N	N	4.2	28.9	16.6	5.3	0.6
PgB01	2238320	2241139	PgB01_g139_t04	+	678	4	nuclear hormone receptor family member nhr-121			N	N	N	3.5	12.7	5.4	3.2	0.4
PgB01	2244289	2246868	PgB01_g140_t01	+	874	3	hypothetical protein	SL		N	Y	Y	0.5	0.3	6.1	0	2.9
PgB01	2259555	2270844	PgB01_g141_t01	+	2020	8	Protein FAM102A	SL		N	Y	Y	8.1	3.2	7	4.7	0.9
PgB01	2261969	2270844	PgB01_g141_t02	+	1955	8	Protein FAM102A	SL		N	N	N	8.1	3.3	7.3	4.8	0.9
PgB01	2274566	2280062	PgB01_g142_t01	+	1130	7	hypothetical protein			N	Y	Y	1	0.2	0	0	5.5
PgB01	2281136	2288472	PgB01_g143_t01	-	985	7	Catechol O-methyltransferase domain-containing protein 1	SL		N	Y	N	3.4	1.8	3.6	10.3	9.3
PgB01	2281136	2288569	PgB01_g143_t02	-	1003	6	Catechol O-methyltransferase domain-containing protein 1	SL		N	N	Y	5.6	4.1	3.5	14.3	20.3
PgB01	2292349	2295129	PgB01_g144_t01	-	619	4	hypothetical protein			N	Y	Y	2.1	0	0	0	1.5
PgB01	2305095	2311729	PgB01_g145_t01	-	1043	7	Matrix metalloproteinase-24			N	N	N	0	0.9	0	0	0.9
PgB01	2305939	2317018	PgB01_g145_t02	-	1168	9	Matrix metalloproteinase-24			N	N	N	0	1.3	0	0	1.1
PgB01	2305939	2317580	PgB01_g145_t03	-	1175	9	Matrix metalloproteinase-24			N	Y	Y	0	0.9	0	0	1
PgB01	2325296	2333796	PgB01_g146_t01	+	1854	9	factor viii intron 22 protein	SL		N	N	N	6.2	17.5	13.4	2	4.9
PgB01	2325296	2333796	PgB01_g146_t02	+	1949	10	factor viii intron 22 protein	SL		N	Y	N	6.5	19.8	13.4	1.9	5.1
PgB01	2328596	2333796	PgB01_g146_t03	+	2142	6	factor viii intron 22 protein	SL		N	N	Y	4.2	9	8.7	1.7	2.8
PgB01	2328596	2333796	PgB01_g146_t04	+	1624	7	factor viii intron 22 protein	SL		N	N	N	5.6	11.7	9.1	2.2	3.7
PgB01	2331623	2333796	PgB01_g146_t05	+	533	3	factor viii intron 22 protein			N	N	N	6.5	8.9	7.4	0.1	4.5
PgB01	2336588	2337928	PgB01_g147_t01	+	346	3	Serine/threonine-protein kinase Nek7	SL		N	Y	N	3.1	32.4	11.2	0	5.9
PgB01	2336588	2342130	PgB01_g147_t02	+	1341	7	Serine/threonine-protein kinase Nek7	SL		N	N	Y	5.4	25.5	12.3	1.8	3.8
PgB01	2338936	2342130	PgB01_g147_t03	+	975	5	Serine/threonine-protein kinase Nek7			N	N	N	5.8	20.4	11.4	2.5	2.5
PgB01	2343600	2347306	PgB01_g148_t01	+	1245	5	transcription initiation factor tfiid subunit 5	SL		N	Y	Y	5.6	15.5	5.8	2.9	1.7
PgB01	2343761	2347306	PgB01_g148_t02	+	902	4	transcription initiation factor tfiid subunit 5	SL		N	N	N	6	15.7	2.4	2.4	1.9
PgB01	2351671	2354661	PgB01_g149_t01	-	455	5	and pleckstrin domain-containing protein 2			N	Y	Y	1.3	1.5	0	0	0.5
PgB01	2355728	2357145	PgB01_g150_t01	-	744	2	and pleckstrin domain-containing protein 2			N	Y	Y	0.9	0	0	0	0
PgB01	2357930	2362288	PgB01_g151_t01	-	797	8	FERM, RhoGEF and pleckstrin domain-containing protein 2			N	Y	Y	0.5	2.1	0	0	0.1
PgB01	2369470	2372623	PgB01_g152_t01	-	3061	2	FERM, RhoGEF and pleckstrin domain-containing protein 1			N	N	N	3.8	10.5	3.7	0.5	1.3
PgB01	2369470	2391236	PgB01_g152_t02	-	4187	10	FERM, RhoGEF and pleckstrin domain-containing protein 1	SL		N	Y	Y	3.2	9.5	3.5	0.6	1.4
PgB01	2429619	2437274	PgB01_g153_t01	+	3945	4	cre-dpy-6 protein			N	Y	Y	0	0	0	0	0
PgB01	2437535	2438479	PgB01_g154_t01	+	486	2	cre-dpy-6 protein			N	Y	Y	0.1	0	0	0	0
PgB01	2443724	2444823	PgB01_g155_t01	-	674	2	hypothetical protein			N	Y	Y	0	0.4	28.8	0	1.3
PgB01	2463671	2469643	PgB01_g156_t01	-	1113	8	Endonuclease G			N	Y	Y	1.6	14.9	8.1	2.4	5.8
PgB01	2463671	2469643	PgB01_g156_t02	-	1099	8	Endonuclease G			N	N	N	1.8	14.8	8.2	2.6	5.2
PgB01	2465162	2469614	PgB01_g156_t03	-	876	7	Endonuclease G			N	N	N	2.1	18.3	9.1	3.1	7.1
PgB01	2473967	2503461	PgB01_g157_t01	-	5945	39	ATP-binding cassette sub-family A member 1			N	N	N	32.3	22.1	13.9	13.9	4.3
PgB01	2473967	2507872	PgB01_g157_t02	-	7028	44	ATP-binding cassette sub-family A member 1	SL		N	Y	N	33.2	22.1	13	14	4.3
PgB01	2474532	2503454	PgB01_g157_t03	-	6324	38	ATP-binding cassette sub-family A member 1			N	N	N	30.4	20.3	12.1	13	4.1
PgB01	2474532	2504551	PgB01_g157_t04	-	6487	39	ATP-binding cassette sub-family A member 1			N	N	N	31.1	20.2	12.3	13.2	4.1
PgB01	2474532	2511856	PgB01_g157_t05	-	7436	43	ATP-binding cassette sub-family A member 1	SL		N	N	Y	31.5	20.5	11.5	13.1	4.1
PgB01	2474532	2511856	PgB01_g157_t06	-	7436	45	ATP-binding cassette sub-family A member 1	SL		N	N	N	31.4	20.5	11.5	13.1	4.1
PgB01	2480170	2501772	PgB01_g157_t07	-	4022	28	ATP-binding cassette sub-family A member 1			N	N	N	35.7	25.4	15.9	14.5	4.8
PgB01	2480170	2503461	PgB01_g157_t08	-	4357	30	ATP-binding cassette sub-family A member 1			N	N	N	36.6	24.9	15.5	13.9	4.8
PgB01	2480170	2504536	PgB01_g157_t09	-	4498	32	ATP-binding cassette sub-family A member 1			N	N	N	37.4	24.8	15.4	14.3	4.8
PgB01	2480170	2504551	PgB01_g157_t10	-	4513	31	ATP-binding cassette sub-family A member 1			N	N	N	37.5	24.7	15.7	14.3	4.8
PgB01	2520035	2547856	PgB01_g158_t01	+	2045	12	Matrix metalloproteinase-24	SL		N	N	Y	10.5	12.6	2.9	5	23.3
PgB01	2522448	2547856	PgB01_g158_t02	+	1719	12	Matrix metalloproteinase-24	SL		N	Y	N	11.8	14.7	3	4.6	24.2
PgB01	2550831	2558406	PgB01_g159_t01	-	1378	9	ras-related gtp-binding protein d	SL		N	N	Y	2.5	6.8	5.8	1.5	1.2
PgB01	2550831	2558406	PgB01_g159_t02	-	1378	9	ras-related gtp-binding protein d	SL		N	Y	N	2.5	6.8	5.8	1.5	1.2
PgB01	2564700	2573591	PgB01_g160_t01	-	1441	9	Cell division protein kinase 2	SL		N	Y	N	6.2	19.5	15.5	2.9	1.7
PgB01	2564700	2573637	PgB01_g160_t02	-	1487	8	Cell division protein kinase 2	SL		N	N	N	6.1	18.5	15.1	2.8	1.6
PgB01	2564700	2573637	PgB01_g160_t03	-	1493	8	cyclin-dependent kinase 2	SL		N	N	N	5.9	18.1	14.8	2.7	1.6
PgB01	2564700	2573637	PgB01_g160_t04	-	1493	8	cyclin-dependent kinase 2	SL		N	N	N	5.9	18.1	14.8	2.7	1.6
PgB01	2564700	2573642	PgB01_g160_t05	-	1488	8	cyclin-dependent kinase 2	SL		N	N	N	6.1	18.4	15.1	2.8	1.6
PgB01	2564700	2573697	PgB01_g160_t06	-	1547	8	Cell division protein kinase 2	SL		N	N	N	5.9	18	14.5	2.7	1.6
PgB01	2564700	2573702	PgB01_g160_t07	-	1552	8	Cell division protein kinase 2	SL		N	N	Y	5.8	18	14.4	2.7	1.6
PgB01	2564700	2573702	PgB01_g160_t08	-	1552	8	Cell division protein kinase 2	SL		N	N	N	5.8	18	14.4	2.7	1.6
PgB01	2567003	2573702	PgB01_g160_t09	-	976	6	cyclin-dependent kinase 2	SL		N	N	N	7.1	23.1	19.2	2.9	1.9
PgB01	2577720	2591101	PgB01_g161_t01	+	2266	14	DNA replication licensing factor mcm7	SL		N	N	N	5.7	7.7	8.8	1.5	0.6
PgB01	2577730	2589003	PgB01_g161_t02	+	1900	12	DNA replication licensing factor mcm7	SL		N	N	N	6.8	9.1	9.4	1.6	0.7
PgB01	2577730	2590524	PgB01_g161_t03	+	1952	13	DNA replication licensing factor mcm7	SL		N	N	N	6.6	8.9	9.1	1.5	0.7
PgB01	2578199	2591101	PgB01_g161_t04	+	2758	14	DNA replication licensing factor mcm7	SL		N	N	Y	5.2	6.5	7.2	1.2	0.5
PgB01	2578212	2591101	PgB01_g161_t05	+	2745	14	DNA replication licensing factor mcm7	SL		N	N	N	5.2	6.5	7.3	1.2	0.5
PgB01	2578670	2590524	PgB01_g161_t06	+	2192	12	DNA replication licensing factor mcm7	SL		N	N	N	5.9	8.2	8.1	1.4	0.8
PgB01	2578670	2591101	PgB01_g161_t07	+	2496	13	DNA replication licensing factor mcm7	SL		N	N	N	5.2	7.2	8	1.3	0.7
PgB01	2584394	2591101	PgB01_g161_t08	+	1488	9	DNA replication licensing factor mcm7			N	Y	N	5.8	7.7	9.4	2	0.6
PgB01	2584395	2589905	PgB01_g161_t09	+	1183	8	DNA replication licensing factor mcm7			N	N	N	7.3	9.6	10	2.3	0.7
PgB01	2594005	2601789	PgB01_g162_t01	+	1168	12	Proteasome subunit alpha type-1			N	N	N	29.3	45.7	22.1	22.5	14.5
PgB01	2594005	2601789	PgB01_g162_t02	+	1168	12	Proteasome subunit alpha type-1			N	N	N	29.3	46	22	22.6	14.5
PgB01	2594005	2601789	PgB01_g162_t03	+	1168	12	Proteasome subunit alpha type-1			N	N	N	29.3	46	22	22.6	14.5
PgB01	2594005	2602861	PgB01_g162_t04	+	1835	12	Proteasome subunit alpha type-1		Telo	N	Y	Y	52.3	86.1	44.1	29.6	19.4
PgB01	2594196	2601789	PgB01_g162_t05	+	977	11	Proteasome subunit alpha type-1			N	N	N	35	54.9	26.3	26.3	17.3
PgB01	2594199	2601789	PgB01_g162_t06	+	974	11	Proteasome subunit alpha type-1			N	N	N	34.3	52.7	26.4	25.9	17.1
PgB01	2595280	2601789	PgB01_g162_t07	+	942	11	Proteasome subunit alpha type-1			N	N	N	35.5	54.2	27.3	26.3	17.3
PgB01	2595302	2601789	PgB01_g162_t08	+	920	12	Proteasome subunit alpha type-1			N	N	N	36.8	56	28	27.3	18
PgB01	2596111	2599262	PgB01_g162_t09	+	472	7	Proteasome subunit alpha type-1			N	N	N	44.2	70.2	33.6	34.6	20.4
PgB01	2601655	2609050	PgB01_g163_t01	-	3169	11	Heat shock 70 kDa protein C	SL	Telo	N	N	Y	225.1	350	178.6	132.3	73.7
PgB01	2601655	2609058	PgB01_g163_t02	-	3096	11	Heat shock 70 kDa protein C	SL	Telo	N	Y	N	210.2	323.8	165.1	127	69.3
PgB01	2601655	2609612	PgB01_g163_t03	-	3161	11	Heat shock 70 kDa protein C	SL	Telo	N	N	N	224.4	350.9	179	132.6	73.9
PgB01	2605166	2606770	PgB01_g163_t04	-	749	2	Heat shock 70 kDa protein C			N	N	N	158.3	265.1	113.9	110.4	55.8
PgB01	2605166	2606770	PgB01_g163_t05	-	749	3	Heat shock 70 kDa protein C			N	N	N	157.2	264.8	114.1	110.1	56.1
PgB01	2611069	2617169	PgB01_g164_t01	-	1490	8	dna-directed rna polymerase iii subunit rpc10	SL		N	N	N	6.3	10.3	6.9	3.8	2.1
PgB01	2611069	2617527	PgB01_g164_t02	-	1844	8	dna-directed rna polymerase iii subunit rpc10	SL		N	N	N	5.1	8.3	5.6	3.1	1.7
PgB01	2611069	2617527	PgB01_g164_t03	-	1848	9	dna-directed rna polymerase iii subunit rpc10	SL		N	Y	Y	5	8.3	5.6	3.1	1.7
PgB01	2618763	2623427	PgB01_g165_t01	-	1465	7	scavenger mrna-decapping enzyme	SL		N	N	Y	3.9	14.9	4.3	4	1
PgB01	2618763	2623965	PgB01_g165_t02	-	1112	8	scavenger mrna-decapping enzyme	SL		N	Y	N	4.6	19.4	4.4	5.3	1.1
PgB01	2623699	2632345	PgB01_g166_t01	+	1948	10	rna polymerase ii subunit b1 ctd phosphatase	SL		N	N	N	9.7	20.8	11.6	5	3.5
PgB01	2623710	2630497	PgB01_g166_t02	+	1099	8	rna polymerase ii subunit b1 ctd phosphatase	SL		N	N	N	12.9	29.9	12.4	6.6	4.7
PgB01	2624083	2632345	PgB01_g166_t03	+	2015	10	rna polymerase ii subunit b1 ctd phosphatase	SL		N	Y	Y	9.4	20.2	11.2	4.8	3.4
PgB01	2624633	2626305	PgB01_g166_t04	+	246	3	hypothetical protein	SL		N	N	N	6.5	22.5	0	0	2.1
PgB01	2624633	2632345	PgB01_g166_t05	+	1948	10	rna polymerase ii subunit b1 ctd phosphatase	SL		N	N	N	9.7	20.8	11.6	5	3.5
PgB01	2635440	2641117	PgB01_g167_t01	+	467	4	hypothetical protein			N	N	Y	3.1	13.5	1.1	2.3	1.2
PgB01	2635440	2641117	PgB01_g167_t02	+	467	4	hypothetical protein			N	Y	N	3.1	13.5	1.1	2.3	1.2
PgB01	2636056	2641117	PgB01_g167_t03	+	457	4	hypothetical protein			N	N	N	3.2	13.8	1.1	2.4	1.2
PgB01	2636056	2641117	PgB01_g167_t04	+	457	4	hypothetical protein			N	N	N	3.2	13.8	1.1	2.4	1.2
PgB01	2655967	2664651	PgB01_g168_t01	-	2441	12	flavoprotein subunit of succinate dehydrogenase			N	N	Y	37.3	174.8	59.6	161.9	76.2
PgB01	2655967	2664651	PgB01_g168_t02	-	2441	12	flavoprotein subunit of succinate dehydrogenase			N	Y	N	36.3	171.2	58	157.3	74.5
PgB01	2664216	2665261	PgB01_g169_t01	+	331	2	flavoprotein subunit of succinate dehydrogenase			N	Y	Y	23.7	92.6	34	113.3	36.7
PgB01	2672322	2677835	PgB01_g170_t01	-	1643	8	Transporter	SL		N	N	N	0.2	24.1	23.5	0.5	0
PgB01	2672322	2681803	PgB01_g170_t02	-	2045	9	Transporter	SL		N	Y	Y	0.1	25.6	20.9	0.4	0
PgB01	2685541	2696188	PgB01_g171_t01	+	2007	12	Zinc metalloproteinase nas-10		Telo	N	N	Y	0.8	0	0.6	0	2.1
PgB01	2685697	2696188	PgB01_g171_t02	+	1851	13	Zinc metalloproteinase nas-10			N	Y	N	0.9	0	0.7	0	2.2
PgB01	2690840	2692637	PgB01_g171_t03	+	252	3	Zinc metalloproteinase nas-10			N	N	N	1.4	0	0	0	4
PgB01	2699638	2707565	PgB01_g172_t01	+	1032	7	hypothetical protein	SL	Telo	N	Y	Y	0.6	10.8	1.9	14.3	86.7
PgB01	2702738	2705736	PgB01_g172_t02	+	414	4	hypothetical protein	SL	Telo	N	N	N	0	8.6	4.3	16.8	66.2
PgB01	2710237	2715222	PgB01_g173_t01	+	839	6	hypothetical protein			N	Y	Y	1.8	0.9	1.7	0	0
PgB01	2718247	2729239	PgB01_g174_t01	+	1531	12	tudor domain containing protein	SL		N	N	N	6.3	12.8	3.1	1.3	0.9
PgB01	2718247	2729917	PgB01_g174_t02	+	1692	13	tudor domain containing protein	SL		N	N	N	5.9	12.4	2.8	1.1	0.8
PgB01	2718247	2731372	PgB01_g174_t03	+	2081	15	tudor domain containing protein	SL		N	N	Y	5.4	10.9	2.9	1	0.6
PgB01	2718247	2731372	PgB01_g174_t04	+	2069	15	tudor domain containing protein	SL		N	N	N	5.5	11	2.9	1	0.6
PgB01	2718247	2731372	PgB01_g174_t05	+	2069	15	tudor domain containing protein	SL		N	Y	N	5.5	10.8	2.9	1	0.6
PgB01	2718247	2731372	PgB01_g174_t06	+	2081	15	tudor domain containing protein	SL		N	N	N	5.4	10.9	2.9	1	0.6
PgB01	2718247	2731372	PgB01_g174_t07	+	2069	15	tudor domain containing protein	SL		N	N	N	5.5	11	2.9	1	0.6
PgB01	2718247	2731372	PgB01_g174_t08	+	2081	15	tudor domain containing protein	SL		N	N	N	5.4	10.8	2.9	1	0.6
PgB01	2719906	2729917	PgB01_g174_t09	+	1533	12	tudor domain containing protein	SL		N	N	N	5.5	12.8	2.3	1.3	0.8
PgB01	2725335	2729239	PgB01_g174_t10	+	373	3	tudor domain containing protein			N	N	N	3.4	11.6	0	2	1
PgB01	2734370	2736943	PgB01_g175_t01	+	971	4	Nuclear nucleic acid-binding protein C1D	SL		N	Y	Y	13.8	34.6	29.6	6.5	1.2
PgB01	2734370	2736943	PgB01_g175_t02	+	696	5	Nuclear nucleic acid-binding protein C1D	SL		N	N	N	19.4	48.1	40.6	8	1.7
PgB01	2739879	2741509	PgB01_g176_t01	+	451	3	hypothetical protein	SL		N	Y	Y	7.3	22.3	17.9	6.2	3.1
PgB01	2742315	2756537	PgB01_g177_t01	+	2453	14	hypothetical protein			N	N	Y	9.1	16.2	17.8	8.2	3
PgB01	2742315	2757473	PgB01_g177_t02	+	2367	14	hypothetical protein			N	Y	N	9.3	16.7	18.3	8.5	3.1
PgB01	2761692	2774550	PgB01_g178_t01	+	2303	16	hypothetical protein			N	N	N	39.1	30.5	24.2	26.3	13.5
PgB01	2761692	2782254	PgB01_g178_t02	+	3528	24	Protein transport protein Sec16			N	N	N	39.3	32.3	26.7	27.6	13.2
PgB01	2761692	2793615	PgB01_g178_t03	+	6745	40	Protein transport protein Sec16			N	N	N	29.4	25.8	27.7	24.3	9.7
PgB01	2761692	2793615	PgB01_g178_t04	+	6751	40	Protein transport protein Sec16			N	N	N	29.4	25.8	27.7	24.3	9.7
PgB01	2761692	2793615	PgB01_g178_t05	+	6748	41	Protein transport protein Sec16			N	N	N	29.4	25.8	27.7	24.3	9.7
PgB01	2761704	2793615	PgB01_g178_t06	+	6739	40	Protein transport protein Sec16			N	N	N	29.4	25.8	27.7	24.3	9.7
PgB01	2761704	2793615	PgB01_g178_t07	+	6733	41	Protein transport protein Sec16			N	N	N	29.4	25.9	27.8	24.3	9.7
PgB01	2762285	2793615	PgB01_g178_t08	+	7268	39	Protein transport protein Sec16			N	N	Y	27.4	24	25.7	22.5	9
PgB01	2762285	2793615	PgB01_g178_t09	+	7265	40	Protein transport protein Sec16			N	N	N	27.4	24	25.7	22.6	9
PgB01	2762285	2793615	PgB01_g178_t10	+	7262	39	Protein transport protein Sec16			N	N	N	27.4	24	25.7	22.6	9
PgB01	2762678	2793615	PgB01_g178_t11	+	6869	40	Protein transport protein Sec16			N	N	N	28.8	25.3	27.2	23.9	9.5
PgB01	2762848	2790876	PgB01_g178_t12	+	5964	35	Protein transport protein Sec16			N	N	N	32.6	27.7	29.9	26.1	10.7
PgB01	2762848	2793615	PgB01_g178_t13	+	6705	39	Protein transport protein Sec16			N	N	N	29.5	25.9	27.9	24.4	9.7
PgB01	2780381	2782254	PgB01_g178_t14	+	306	3	Protein transport protein Sec16			N	Y	N	22.3	14.1	7.1	21.3	4
PgB01	2782559	2793615	PgB01_g178_t15	+	2928	17	trna selenocysteine 1-associated protein 1			N	N	N	20.3	20.5	31.5	22.6	6.4
PgB01	2782586	2790876	PgB01_g178_t16	+	2130	13	trna selenocysteine 1-associated protein 1			N	N	N	26.4	24.2	39.5	27.2	8.1
PgB01	2795007	2811818	PgB01_g179_t01	+	2902	8	trna selenocysteine 1-associated protein 1	SL		N	N	Y	8.2	22.6	36	10.1	3.3
PgB01	2796210	2811818	PgB01_g179_t02	+	2883	7	trna selenocysteine 1-associated protein 1	SL		N	N	N	6.3	19	26.1	8.7	2.7
PgB01	2796210	2811818	PgB01_g179_t03	+	2883	7	trna selenocysteine 1-associated protein 1	SL		N	Y	N	8.3	22.7	36.2	10.2	3.3
PgB01	2799758	2811818	PgB01_g179_t04	+	2289	3	trna selenocysteine 1-associated protein 1	SL		N	N	N	3	9	17.1	3.6	1.1
PgB01	2808751	2825033	PgB01_g180_t01	-	4908	15	peroxisomal biogenesis factor 3	SL	Telo	N	N	N	7.9	16.9	14.1	5.9	5
PgB01	2808751	2825033	PgB01_g180_t02	-	4916	15	peroxisomal biogenesis factor 3	SL	Telo	N	N	Y	7.8	16.8	14.1	5.9	5
PgB01	2818440	2825138	PgB01_g180_t03	-	1417	7	translation initiation factor 4E	SL		N	Y	N	9.7	20.3	20.7	2.8	8.5
PgB01	2827142	2828866	PgB01_g181_t01	+	495	2	WD repeat-containing protein 35			N	Y	N	9.8	1.1	1.2	0	0
PgB01	2827142	2829083	PgB01_g181_t02	+	542	2	WD repeat-containing protein 35			N	N	Y	9.5	1	1.1	0	0
PgB01	2827142	2833738	PgB01_g182_t01	-	1285	9	WD repeat-containing protein 35	SL		N	Y	N	14.5	2.1	1.2	0	0
PgB01	2827142	2837913	PgB01_g182_t02	-	2206	14	WD repeat-containing protein 35	SL		N	N	Y	19.4	1.4	1	0	0
PgB01	2827142	2837913	PgB01_g182_t03	-	2206	14	WD repeat-containing protein 35	SL		N	N	N	17	1.2	0.7	0	0
PgB01	2854235	2854703	PgB01_g183_t01	+	243	2	hypothetical protein			N	Y	Y	0.1	0	0	0	0
PgB01	2886879	2900500	PgB01_g184_t01	+	1074	10	Mechanosensory protein 2			N	Y	Y	0.4	0.1	0.7	1.5	0.3
PgB01	2910478	2914895	PgB01_g185_t01	+	3220	2	hypothetical protein			N	Y	Y	0	7.7	3.1	0.1	0.3
PgB01	2910478	2915890	PgB01_g185_t02	+	507	3	hypothetical protein			N	N	N	0	7.8	7	0.5	0.2
PgB01	2910508	2915890	PgB01_g185_t03	+	258	2	hypothetical protein			N	N	N	0	6.2	0	1	0
PgB01	2919820	2925296	PgB01_g186_t01	-	802	5	hypothetical protein			N	Y	N	2.1	3.6	2.4	0	6.8
PgB01	2919820	2925425	PgB01_g186_t02	-	919	5	hypothetical protein			N	N	Y	1.8	3.2	2.1	0	6
PgB01	2973219	2974291	PgB01_g187_t01	-	392	2	hypothetical protein			N	Y	Y	0	0	0.9	0	0
PgB01	2983304	2991469	PgB01_g188_t01	-	1997	11	Telomerase Cajal body protein 1	SL		N	Y	Y	7.8	14.6	7.8	5.8	3.2
PgB01	2992693	3003899	PgB01_g189_t01	-	2654	14	RAD50-interacting protein 1	SL		N	N	Y	5.7	9.7	3.4	4.6	3.2
PgB01	2992693	3005032	PgB01_g189_t02	-	2372	15	RAD50-interacting protein 1	SL		N	N	N	6.4	10.9	3.7	5.1	3.7
PgB01	2993514	2999207	PgB01_g189_t03	-	1152	8	RINT1-like protein			N	Y	N	7.8	9.9	3.6	6.4	2.8
PgB01	3005086	3014505	PgB01_g190_t01	-	2134	10	RAD50-interacting protein 1			N	Y	Y	102.5	3.3	4.8	2.7	1
PgB01	3005086	3014651	PgB01_g190_t02	-	1915	11	RAD50-interacting protein 1			N	N	N	114.6	4.2	5.3	3	1.2
PgB01	3012977	3014140	PgB01_g190_t03	-	359	2	RAD50-interacting protein 1			N	N	N	24.3	0.3	0	0	0
PgB01	3012977	3014393	PgB01_g190_t04	-	411	2	RAD50-interacting protein 1			N	N	N	31.9	1.6	0	0.5	0
PgB01	3016657	3020682	PgB01_g191_t01	+	807	4	hypothetical protein			N	Y	Y	0.2	11.1	0.8	0.1	0.2
PgB01	3020337	3037306	PgB01_g192_t01	-	2894	17	grip and coiled-coil domain-containing protein 2			N	Y	Y	10.7	24.4	9.4	7	3.1
PgB01	3047910	3065965	PgB01_g193_t01	-	3338	14	histone deacetylase 4			N	Y	N	9.6	34.6	24.4	30.8	17.3
PgB01	3047910	3066008	PgB01_g193_t02	-	3806	13	histone deacetylase 4			N	N	Y	8.3	30.2	21.4	27.2	15.1
PgB01	3069843	3072710	PgB01_g194_t01	+	2868	1	hypothetical protein			N	N	Y	11	0	0	0.5	0.1
PgB01	3069843	3073863	PgB01_g194_t02	+	1368	3	hypothetical protein			N	N	N	9.8	0	0	0	0.1
PgB01	3069860	3072710	PgB01_g194_t03	+	2343	2	hypothetical protein			N	Y	N	11.8	0	0	0.6	0.1
PgB01	3070928	3073863	PgB01_g194_t04	+	1666	2	hypothetical protein			N	N	N	11.8	0	0	0.9	0.1
PgB01	3079082	3094674	PgB01_g195_t01	-	2660	20	Rab-3-interacting molecule unc-10			N	N	N	2	6.1	6.1	0.1	1.9
PgB01	3079082	3094674	PgB01_g195_t02	-	2654	20	Rab-3-interacting molecule unc-10			N	N	N	2	6.1	6.1	0.1	1.9
PgB01	3079082	3131723	PgB01_g195_t03	-	4439	32	Rab-3-interacting molecule unc-10			N	N	N	1.5	5.8	6.2	0.1	2.1
PgB01	3079082	3131723	PgB01_g195_t04	-	4430	32	Rab-3-interacting molecule unc-10			N	N	N	1.5	5.8	6.2	0.1	2.1
PgB01	3079082	3131723	PgB01_g195_t05	-	4430	32	Rab-3-interacting molecule unc-10			N	N	N	1.5	5.8	6.2	0.1	2.1
PgB01	3079082	3131723	PgB01_g195_t06	-	4436	32	Rab-3-interacting molecule unc-10			N	N	N	1.5	5.8	6.2	0.1	2.1
PgB01	3079082	3131723	PgB01_g195_t07	-	4445	32	Rab-3-interacting molecule unc-10			N	Y	Y	1.5	5.8	6.2	0.1	2.1
PgB01	3151212	3172326	PgB01_g196_t01	+	4810	30	hypothetical protein			N	N	N	9.2	12.2	13.8	9.7	2.8
PgB01	3151212	3172326	PgB01_g196_t02	+	4810	31	hypothetical protein			N	Y	N	9.2	12.2	13.8	9.7	2.8
PgB01	3152240	3172326	PgB01_g196_t03	+	4857	30	hypothetical protein			N	N	Y	9.1	11.9	13.6	9.6	2.7
PgB01	3173625	3180535	PgB01_g197_t01	+	1120	5	hypothetical protein	SL	Telo	N	Y	Y	2.7	49.3	18.6	1.3	0.8
PgB01	3185238	3189064	PgB01_g198_t01	+	1092	7	hypothetical protein	SL		N	Y	Y	2.9	9.7	6.5	0	0
PgB01	3191380	3198635	PgB01_g199_t01	+	693	5	hypothetical protein			N	Y	Y	0.3	0	0	0	0.4
PgB01	3202537	3210097	PgB01_g200_t01	+	2241	6	hypothetical protein		Telo	N	Y	Y	0	0	0.9	0.5	71.9
PgB01	3210415	3216570	PgB01_g201_t01	-	2007	7	hypothetical protein	SL		N	N	Y	0.2	0	0.1	5.1	2.4
PgB01	3214343	3216411	PgB01_g201_t02	-	521	3	hypothetical protein	SL		N	Y	N	0.8	0	0.3	10.5	4.1
PgB01	3220283	3223069	PgB01_g202_t01	+	1104	3	hypothetical protein		Telo	N	Y	Y	0.2	59.2	85.9	0.3	18.1
PgB01	3227107	3233034	PgB01_g203_t01	+	2089	5	Transformer-2 protein alpha		Telo	N	Y	N	36.6	49.8	36.1	18.7	5.5
PgB01	3227107	3233034	PgB01_g203_t02	+	2846	5	Transformer-2 protein alpha		Telo	N	N	Y	29	35.3	26.2	13.3	4.4
PgB01	3227107	3233034	PgB01_g203_t03	+	2323	6	Transformer-2 protein alpha		Telo	N	N	N	35.3	43.5	32.5	16.3	5.4
PgB01	3235467	3256897	PgB01_g204_t01	-	3520	22	hypothetical protein	SL		N	N	N	13.4	55.4	24.6	9.9	6.1
PgB01	3235467	3256897	PgB01_g204_t02	-	3520	21	hypothetical protein	SL		N	N	N	13.4	55.4	24.6	9.9	6.1
PgB01	3235467	3256907	PgB01_g204_t03	-	3530	21	hypothetical protein	SL		N	Y	N	13.4	55.3	24.5	9.8	6.1
PgB01	3235467	3256907	PgB01_g204_t04	-	3530	22	hypothetical protein	SL		N	N	N	13.4	55.3	24.5	9.8	6.1
PgB01	3235467	3256909	PgB01_g204_t05	-	3532	22	hypothetical protein	SL		N	N	N	13.3	55.2	24.5	9.8	6.1
PgB01	3235467	3256909	PgB01_g204_t06	-	3532	21	hypothetical protein	SL		N	N	N	13.3	55.2	24.5	9.8	6.1
PgB01	3235467	3257016	PgB01_g204_t07	-	3639	21	hypothetical protein	SL		N	N	Y	13	53.7	23.8	9.5	5.9
PgB01	3235467	3257016	PgB01_g204_t08	-	3639	22	hypothetical protein	SL		N	N	N	13	53.7	23.8	9.5	5.9
PgB01	3235467	3257016	PgB01_g204_t09	-	3639	22	hypothetical protein	SL		N	N	N	13	53.7	23.8	9.5	5.9
PgB01	3257813	3260567	PgB01_g205_t01	-	1117	4	Translationally-controlled tumor protein homolog	SL		N	N	Y	113.9	303.2	78.5	179.4	149.1
PgB01	3257813	3260718	PgB01_g205_t02	-	1065	5	Translationally-controlled tumor protein homolog	SL		N	Y	N	119.4	317.7	80.7	187.9	156.1
PgB01	3261297	3265397	PgB01_g206_t01	-	1590	6	60S acidic ribosomal protein P0	SL	Telo	N	Y	Y	209.1	600.9	219.1	186.8	97.8
PgB01	3269054	3277615	PgB01_g207_t01	-	1881	11	sister chromatid cohesion protein dcc1			N	Y	Y	11.8	28.7	15.8	4.2	2.6
PgB01	3281444	3286018	PgB01_g208_t01	-	715	5	cre-abu-10 protein			N	Y	Y	6.9	2.7	0.8	0	0.9
PgB01	3289392	3297120	PgB01_g209_t01	-	1691	11	Phosphoglycerate kinase	SL		N	N	N	48.7	182.2	54.2	65	108.7
PgB01	3289392	3298626	PgB01_g209_t02	-	1752	11	Phosphoglycerate kinase	SL		N	N	Y	47.4	175.9	52.3	62.7	104.9
PgB01	3289392	3298626	PgB01_g209_t03	-	1752	11	Phosphoglycerate kinase	SL		N	N	N	47.4	175.9	52.3	62.7	104.9
PgB01	3289392	3298798	PgB01_g209_t04	-	1752	11	Phosphoglycerate kinase	SL		N	N	N	47	175.9	52.3	62.7	104.9
PgB01	3289392	3298798	PgB01_g209_t05	-	1752	11	Phosphoglycerate kinase	SL		N	Y	N	47	175.9	52.3	62.7	104.9
PgB01	3302178	3310065	PgB01_g210_t01	+	1387	8	RRNA-processing protein FCF1			N	Y	Y	5.5	6.6	3.3	0.1	2.7
PgB01	3302526	3310065	PgB01_g210_t02	+	964	7	RRNA-processing protein FCF1			N	N	N	7.4	9.2	3.9	0.1	2.6
PgB01	3311973	3318139	PgB01_g211_t01	+	1336	7	hypothetical protein			N	N	N	7.2	55.6	18.1	17.4	14.8
PgB01	3311973	3318982	PgB01_g211_t02	+	2125	7	hypothetical protein			N	Y	Y	6.3	44.1	18.6	12.1	11.7
PgB01	3312285	3314369	PgB01_g211_t03	+	427	3	hypothetical protein			N	N	N	10.9	78.6	23.4	21.2	16
PgB01	3322465	3326160	PgB01_g212_t01	-	1255	5	cre-grd-7 protein			N	N	N	1.4	3	2	1.5	1
PgB01	3322465	3332608	PgB01_g212_t02	-	2177	10	cre-grd-7 protein	SL		N	Y	Y	1.5	2.9	2.9	1	1
PgB01	3322465	3332608	PgB01_g212_t03	-	1988	10	cre-grd-7 protein	SL		N	N	N	1.6	2.8	3.2	1.1	1.1
PgB01	3324545	3331567	PgB01_g212_t04	-	1009	8	cre-grd-7 protein			N	N	N	1.6	3.5	4.2	0.4	0.7
PgB01	3326482	3331554	PgB01_g212_t05	-	698	5	cre-grd-7 protein			N	N	N	1.8	2.9	5.5	0.4	1.2
PgB01	3326482	3332644	PgB01_g212_t06	-	692	5	cre-grd-7 protein	SL		N	N	N	1.2	3.2	5.6	0.4	1.2
PgB01	3333552	3360521	PgB01_g213_t01	-	4972	21	227 kDa spindle- and centromere-associated protein			N	N	N	50.8	22.5	26	33	18.3
PgB01	3333552	3360521	PgB01_g213_t02	-	5098	22	227 kDa spindle- and centromere-associated protein			N	N	N	51.2	22	25.8	33.2	17.9
PgB01	3333552	3361199	PgB01_g213_t03	-	4934	23	227 kDa spindle- and centromere-associated protein	SL		N	N	N	51.9	22.6	25.7	34.1	18.7
PgB01	3333552	3361263	PgB01_g213_t04	-	4905	22	227 kDa spindle- and centromere-associated protein	SL		N	N	N	51.8	23	26.5	33.8	18.8
PgB01	3333552	3361263	PgB01_g213_t05	-	4899	22	227 kDa spindle- and centromere-associated protein	SL		N	N	N	50.9	22.8	25.8	34	18.7
PgB01	3333552	3362325	PgB01_g213_t06	-	5293	25	227 kDa spindle- and centromere-associated protein	SL	Telo	N	N	Y	50.9	21.5	25	32.7	17.6
PgB01	3350948	3361199	PgB01_g213_t07	-	3270	8	hypothetical protein	SL		N	Y	N	40	17.9	24.5	22.2	16.3
PgB01	3364346	3369747	PgB01_g214_t01	-	937	8	disks large-like protein 4			N	Y	Y	3.3	8.8	5.9	20	9.6
PgB01	3371452	3383268	PgB01_g215_t01	-	3860	18	microtubule-associated protein futsch		Telo	N	Y	N	151.1	0.1	0.7	1.3	1.7
PgB01	3371452	3383505	PgB01_g215_t02	-	3613	18	microtubule-associated protein futsch		Telo	N	N	N	150	0.1	0.8	1.7	1.6
PgB01	3371452	3383548	PgB01_g215_t03	-	3654	18	microtubule-associated protein futsch		Telo	N	N	N	147.4	0.1	0.8	1.7	1.5
PgB01	3371452	3383548	PgB01_g215_t04	-	3825	19	microtubule-associated protein futsch		Telo	N	N	N	150.3	0.1	0.7	1.7	1.7
PgB01	3371452	3383559	PgB01_g215_t05	-	4557	16	microtubule-associated protein futsch		Telo	N	N	Y	119.8	0.1	0.6	1.4	1.3
PgB01	3371452	3383559	PgB01_g215_t06	-	4094	19	microtubule-associated protein futsch		Telo	N	N	N	135.1	0.1	0.7	1.5	1.4
PgB01	3371452	3383811	PgB01_g215_t07	-	3266	21	microtubule-associated protein futsch		Telo	N	N	N	170.8	0.1	0.8	1.5	1.8
PgB01	3384372	3385582	PgB01_g216_t01	-	984	2	Tyrosine-protein phosphatase non-receptor type 12			N	N	N	70.4	0	0.9	2.2	0.5
PgB01	3384372	3394817	PgB01_g216_t02	-	1886	15	Tyrosine-protein phosphatase non-receptor type 12		Telo	N	N	N	250.5	0	4	4.8	1.6
PgB01	3384372	3394818	PgB01_g216_t03	-	2277	14	Tyrosine-protein phosphatase non-receptor type 12		Telo	N	N	N	207.8	0	3.3	4	1.3
PgB01	3384372	3394820	PgB01_g216_t04	-	1895	15	Tyrosine-protein phosphatase non-receptor type 12		Telo	N	Y	N	249.6	0	4	4.8	1.6
PgB01	3384372	3394820	PgB01_g216_t05	-	2285	14	Tyrosine-protein phosphatase non-receptor type 12		Telo	N	N	Y	207.1	0	3.3	3.9	1.3
PgB01	3454206	3464865	PgB01_g217_t01	-	9081	3	cre-scd-1 protein	SL		N	N	N	0.4	1.5	0.5	1	0.5
PgB01	3454206	3470131	PgB01_g217_t02	-	10595	5	hypothetical protein	SL		N	N	N	2.6	6.6	3.2	2.1	1.1
PgB01	3454206	3470148	PgB01_g217_t03	-	11360	4	hypothetical protein	SL		N	N	Y	2.6	6.4	3	2	1.1
PgB01	3466889	3470155	PgB01_g217_t04	-	1048	4	hypothetical protein	SL		N	N	N	20.9	86.5	51.3	27.2	10.7
PgB01	3466889	3471335	PgB01_g217_t05	-	2351	4	hypothetical protein	SL		N	Y	N	7.9	30.4	17.9	7.3	3.8
PgB01	3507219	3513811	PgB01_g218_t01	+	1332	7	proteolipid protein m6-1			N	Y	N	4	17.2	13.9	0	17.3
PgB01	3507291	3513811	PgB01_g218_t02	+	1493	6	proteolipid protein m6-1			N	N	Y	3.5	15.1	12.9	0	14.9
PgB01	3514897	3515507	PgB01_g219_t01	-	611	1	hypothetical protein			N	N	N	4.8	7.1	6.7	7.7	5.6
PgB01	3514897	3526156	PgB01_g219_t02	-	1869	10	hypothetical protein	SL		N	Y	N	5.9	12.1	11.1	16.7	6.5
PgB01	3517645	3525349	PgB01_g219_t03	-	2920	8	hypothetical protein			N	N	N	3.2	6.4	6.9	10.3	3.2
PgB01	3517645	3529279	PgB01_g219_t04	-	5822	9	hypothetical protein	SL		N	N	Y	1.7	3.5	3.5	5.5	1.7
PgB01	3517645	3529279	PgB01_g219_t05	-	5800	9	hypothetical protein	SL		N	N	N	1.7	3.6	3.7	5.3	1.7
PgB01	3531371	3532023	PgB01_g220_t01	.	653	1	hypothetical protein			N	Y	Y	0.3	0.8	0	0	0
PgB01	3557146	3569272	PgB01_g221_t01	+	2525	16	Poly ADP-ribose polymerase 2			N	N	Y	7.7	9.5	6.7	1.2	0.4
PgB01	3557146	3569272	PgB01_g221_t02	+	2525	16	Poly ADP-ribose polymerase 2			N	Y	N	4.5	6.6	5.2	0.8	0.3
PgB01	3572458	3579577	PgB01_g222_t01	-	1191	7	hypothetical protein	SL		N	Y	Y	0.1	3.3	2.7	0	0.5
PgB01	3573402	3579577	PgB01_g222_t02	-	842	6	hypothetical protein	SL		N	N	N	0.1	3.8	3.2	0	0.3
PgB01	3612701	3624289	PgB01_g223_t01	-	2667	14	E3 ubiquitin-protein ligase RFWD2			N	Y	Y	17.5	27.2	16	8.4	2.3
PgB01	3612701	3625556	PgB01_g223_t02	-	2416	15	E3 ubiquitin-protein ligase RFWD2			N	N	N	19.7	30.8	18.4	8.6	2.5
PgB01	3612701	3625556	PgB01_g223_t03	-	2416	15	E3 ubiquitin-protein ligase RFWD2			N	N	N	19.7	30.8	18.4	8.6	2.5
PgB01	3614614	3624138	PgB01_g223_t04	-	1764	12	E3 ubiquitin-protein ligase RFWD2			N	N	N	22.6	33.9	18.1	10.3	3.3
PgB01	3614614	3624162	PgB01_g223_t05	-	1630	12	E3 ubiquitin-protein ligase RFWD2			N	N	N	25.3	38	20.7	10.2	3.6
PgB01	3648249	3653173	PgB01_g224_t01	+	513	4	B9 domain-containing protein 1	SL		N	Y	Y	2.1	4.5	37.6	0	1.2
PgB01	3653405	3657001	PgB01_g225_t01	-	1014	5	60S ribosomal protein L19		Telo	N	Y	Y	212.3	393.9	159.5	263.4	170.7
PgB01	3654790	3655353	PgB01_g226_t01	.	564	1	60S ribosomal protein L19			N	Y	Y	21.9	42.4	17	33.7	17.2
PgB01	3661210	3673923	PgB01_g227_t01	+	2897	17	Protein EMSY	SL		N	N	N	16.7	3.3	6.7	4.1	0.3
PgB01	3661210	3673923	PgB01_g227_t02	+	2903	17	Protein EMSY	SL		N	Y	N	16.8	3.3	6.6	4	0.3
PgB01	3661384	3673923	PgB01_g227_t03	+	2729	17	Protein EMSY	SL		N	N	N	17.9	3.5	7.1	4.4	0.3
PgB01	3661400	3673923	PgB01_g227_t04	+	2707	17	Protein EMSY	SL		N	N	N	17.9	3.5	7.1	4.5	0.3
PgB01	3661675	3673923	PgB01_g227_t05	+	2974	16	Protein EMSY	SL		N	N	Y	16.6	2.8	6.3	3.8	0.3
PgB01	3676750	3680407	PgB01_g228_t01	-	545	5	hypothetical protein			N	N	N	152.1	0	0.5	2.6	2.7
PgB01	3676750	3681686	PgB01_g228_t02	-	682	7	hypothetical protein			N	N	N	161.3	0	0.4	2.1	3
PgB01	3676750	3682490	PgB01_g228_t03	-	965	7	hypothetical protein			N	Y	Y	126.5	0	0.3	1.5	2.2
PgB01	3676750	3682490	PgB01_g228_t04	-	965	8	hypothetical protein			N	N	N	126.5	0	0.3	1.5	2.2
PgB01	3684082	3685514	PgB01_g229_t01	+	448	3	baif -transferase family protein			N	Y	N	0	12.1	4.3	0	2.7
PgB01	3684082	3688557	PgB01_g229_t02	+	1243	8	baif -transferase family protein			N	N	Y	0.3	6.8	5.6	1.1	3.2
PgB01	3686436	3686771	PgB01_g229_t03	+	336	1	baif -transferase family protein			N	N	N	0	0.8	0	0	0
PgB01	3690148	3695247	PgB01_g230_t01	+	1509	8	CaiB/baiF CoA-transferase family protein			N	Y	Y	0	0.6	0.8	0.2	14.6
PgB01	3699370	3710435	PgB01_g231_t01	+	2192	6	Transmembrane BAX inhibitor motif-containing protein 4			N	Y	Y	19.4	16.5	11.3	10.5	10.2
PgB01	3731671	3746880	PgB01_g232_t01	+	1771	10	synaptotagmin-9	SL		N	N	Y	2.1	95.9	26.3	1.2	1
PgB01	3737386	3746880	PgB01_g232_t02	+	1572	9	synaptotagmin-9			N	Y	N	2.4	82	21.1	1.2	1
PgB01	3764047	3772126	PgB01_g233_t01	+	1915	13	Conserved oligomeric Golgi complex subunit 8	SL		N	Y	Y	8.2	17.7	5.7	6.6	2.9
PgB01	3778056	3780784	PgB01_g234_t01	+	589	4	hypothetical protein			N	Y	Y	0.8	1.9	1.9	0	0
PgB01	3781676	3790460	PgB01_g235_t01	-	3322	11	Transcription factor Dp-1			N	Y	Y	6.3	15.3	18.6	5.4	1.4
PgB01	3783395	3787609	PgB01_g235_t02	-	1404	7	Transcription factor Dp-1			N	N	N	6.5	12.6	16	6.3	2
PgB01	3783395	3790800	PgB01_g235_t03	-	1916	11	Transcription factor Dp-1			N	N	N	7.5	19.1	25.4	9	2.4
PgB01	3793242	3801724	PgB01_g236_t01	-	2172	11	db module family protein	SL	Telo	N	Y	Y	0.8	97.6	37.5	0.2	0.5
PgB01	3793242	3804440	PgB01_g236_t02	-	2121	11	db module family protein	SL	Telo	N	N	N	0.8	99.3	38.4	0.3	0.5
PgB01	3805007	3808223	PgB01_g237_t01	.	3217	1	Histone H2B 2		Telo	N	Y	Y	9.1	29	34.1	6.2	2.9
PgB01	3810045	3815132	PgB01_g238_t01	+	967	7	regulatory protein	SL		N	Y	Y	69.4	185.9	45.1	41	31.8
PgB01	3810057	3814699	PgB01_g238_t02	+	735	7	regulatory protein	SL		N	N	N	79.3	208.3	54.6	44.7	34.8
PgB01	3813225	3814192	PgB01_g239_t01	-	423	2	regulatory protein			N	Y	Y	5.1	22.2	2.4	6.1	2.5
PgB01	3815780	3820687	PgB01_g240_t01	+	1105	6	regulatory protein			N	N	N	1.9	2.4	0.4	1.4	2.9
PgB01	3815780	3831064	PgB01_g240_t02	+	2700	19	methionine--trna	SL		N	Y	N	3.5	7.3	4.1	1.8	1.7
PgB01	3821183	3831064	PgB01_g240_t03	+	2733	13	methionine--trna	SL		N	N	Y	2.7	6.4	3.9	1.5	0.6
PgB01	3833279	3847514	PgB01_g241_t01	-	3114	22	pre-mrna-splicing factor syf1			N	N	N	10.1	15.8	16	7.8	2.8
PgB01	3833279	3847641	PgB01_g241_t02	-	3145	22	pre-mrna-splicing factor syf1			N	Y	Y	10.1	15.6	15.8	7.8	2.9
PgB01	3848250	3868065	PgB01_g242_t01	+	3647	22	ATP-dependent RNA helicase DHX34			N	N	Y	3.7	8.4	3.9	2.5	1.3
PgB01	3848286	3868065	PgB01_g242_t02	+	3642	22	ATP-dependent RNA helicase DHX34			N	N	N	3.7	8.4	3.8	2.4	1.3
PgB01	3848290	3868065	PgB01_g242_t03	+	3565	22	ATP-dependent RNA helicase DHX34			N	Y	N	3.8	8.2	3.6	2.5	1.3
PgB01	3848528	3868065	PgB01_g242_t04	+	3539	22	ATP-dependent RNA helicase DHX34			N	N	N	3.8	8.3	3.5	2.5	1.3
PgB01	3869222	3899780	PgB01_g243_t01	-	1413	7	Ral guanine nucleotide dissociation stimulator-like protein 1			N	N	N	12.4	45.3	28.7	22.3	21.6
PgB01	3869222	3899780	PgB01_g243_t02	-	1413	6	Ral guanine nucleotide dissociation stimulator-like protein 1			N	N	N	12.4	45.3	28.7	22.3	21.6
PgB01	3869222	3902442	PgB01_g243_t03	-	2064	10	Ral guanine nucleotide dissociation stimulator-like protein 1			N	N	N	19.9	59.3	35.4	26.3	27.1
PgB01	3869222	3902442	PgB01_g243_t04	-	2064	10	Ral guanine nucleotide dissociation stimulator-like protein 1			N	N	N	19.9	59.2	35.4	26.2	27.1
PgB01	3869222	3902442	PgB01_g243_t05	-	2064	10	Ral guanine nucleotide dissociation stimulator-like protein 1			N	N	N	19.9	59.2	35.4	26.2	27.1
PgB01	3869222	3916104	PgB01_g243_t06	-	3646	19	Ral guanine nucleotide dissociation stimulator-like protein 1			N	Y	Y	23.3	68.4	36.3	28.2	29.9
PgB01	3869222	3916104	PgB01_g243_t07	-	3646	20	Ral guanine nucleotide dissociation stimulator-like protein 1			N	N	N	23.3	68.4	36.3	28.2	29.9
PgB01	3941473	3974835	PgB01_g244_t01	+	1593	11	uncoordinated protein 58	SL		N	N	N	1	10.9	10.2	0	2.7
PgB01	3943485	3974835	PgB01_g244_t02	+	1683	11	uncoordinated protein 58	SL		N	N	N	1	10.3	9.6	0	2.8
PgB01	3946094	3974835	PgB01_g244_t03	+	1719	11	uncoordinated protein 58	SL		N	N	N	0.9	10.2	9.4	0	2.6
PgB01	3952205	3974835	PgB01_g244_t04	+	1877	11	uncoordinated protein 58	SL		N	Y	Y	1	9.3	10.6	0	2.3
PgB01	3976981	3981645	PgB01_g245_t01	+	2757	4	28S ribosomal protein S28		Telo	N	N	Y	15.8	77.4	33.1	4.2	3
PgB01	3976981	3981645	PgB01_g245_t02	+	2709	4	28S ribosomal protein S28		Telo	N	N	N	15.8	74.1	30.2	4	2.8
PgB01	3976981	3981645	PgB01_g245_t03	+	2129	5	28S ribosomal protein S28		Telo	N	N	N	20.1	100.2	42.8	5.4	3.9
PgB01	3977398	3981645	PgB01_g245_t04	+	1664	5	28S ribosomal protein S28		Telo	N	N	N	25.1	120.3	49.2	6.1	4.6
PgB01	3978132	3981645	PgB01_g245_t05	+	1214	5	28S ribosomal protein S28		Telo	N	Y	N	34	164.8	66	8.4	6.1
PgB01	3983118	3987079	PgB01_g246_t01	-	604	3	hypothetical protein			N	N	N	0	1.8	1.5	0	0
PgB01	3983898	3987034	PgB01_g246_t02	-	459	3	hypothetical protein			N	N	N	0.1	8.6	9	0	0
PgB01	3983898	3996335	PgB01_g246_t03	-	1735	11	beta- -galactosyltransferase 1			N	Y	N	0.1	9.7	4.7	0	0
PgB01	3983898	3996335	PgB01_g246_t04	-	1776	12	beta- -galactosyltransferase 1			N	N	Y	0.1	9.9	3.7	0	0
PgB01	3987803	3988842	PgB01_g246_t05	-	905	2	beta- -galactosyltransferase 1			N	N	N	1.6	2.1	1.8	0	0
PgB01	4011843	4040958	PgB01_g247_t01	+	2835	20	beta-catenin armadillo-related protein 1			N	Y	N	18.5	27.2	34.7	55.9	16.1
PgB01	4011843	4042689	PgB01_g247_t02	+	3018	20	beta-catenin armadillo-related protein 1			N	N	N	17.5	25.9	32.6	53.4	15.5
PgB01	4019203	4042689	PgB01_g247_t03	+	5267	19	beta-catenin armadillo-related protein 1			N	N	N	10.2	14.8	18.7	30.8	8.9
PgB01	4019203	4058632	PgB01_g247_t04	+	18240	22	beta-catenin armadillo-related protein 1			N	N	Y	29.8	5	6.8	10.2	3
PgB01	4043180	4058632	PgB01_g247_t05	+	15453	1	beta-catenin armadillo-related protein 1			N	N	N	34.6	1	1.7	1.8	0.6
PgB01	4047795	4058632	PgB01_g247_t06	+	10080	2	beta-catenin armadillo-related protein 1			N	N	N	39.8	0.8	1.7	1.2	0.4
PgB01	4043180	4048502	PgB01_g248_t01	-	2625	2	beta-catenin armadillo-related protein 1			N	N	N	58.6	2.5	2.9	6.5	2.2
PgB01	4043180	4092243	PgB01_g248_t02	-	6219	20	Protein bunched, class 1/class 3/D/E isoform	SL		N	N	N	116.1	3.2	4.5	6	2.2
PgB01	4043180	4098529	PgB01_g248_t03	-	5254	23	Protein bunched, class 1/class 3/D/E isoform	SL		N	Y	N	136.6	4	5.3	7	2.6
PgB01	4043180	4133621	PgB01_g248_t04	-	7854	39	transmembrane 9 superfamily member 2	SL	Telo	N	N	N	96.8	12.2	11.6	10.5	4.6
PgB01	4048577	4057645	PgB01_g248_t05	-	1406	8	hypothetical protein			N	N	N	371.1	0.4	2.7	6.6	3.2
PgB01	4058784	4069172	PgB01_g248_t06	-	680	5	Protein bunched, class 1/class 3/D/E isoform	SL		N	N	N	3.8	3.6	12.3	1	0.2
PgB01	4058784	4109292	PgB01_g248_t07	-	2239	17	Protein bunched, class 1/class 3/D/E isoform	SL		N	N	N	6	4.3	5.4	3.7	1.1
PgB01	4061049	4089853	PgB01_g248_t08	-	9549	9	Protein bunched, class 1/class 3/D/E isoform	SL		N	N	N	4	0.9	2.7	1.3	0.3
PgB01	4063947	4069172	PgB01_g248_t09	-	1260	4	Protein bunched, class 1/class 3/D/E isoform	SL		N	N	N	3.1	2.1	4.7	0.3	0.1
PgB01	4065540	4089853	PgB01_g248_t10	-	1778	7	Protein bunched, class 1/class 3/D/E isoform	SL		N	N	N	7.8	2.5	3.7	3.1	1
PgB01	4065540	4100412	PgB01_g248_t11	-	15836	10	Protein bunched, class 1/class 3/D/E isoform	SL		N	N	Y	2.8	0.7	1.1	1.2	0.2
PgB01	4089963	4100412	PgB01_g248_t12	-	5686	4	hypothetical protein	SL		N	N	N	2.8	0.5	0.2	1.4	0.1
PgB01	4101280	4105425	PgB01_g248_t13	-	250	2	hypothetical protein			N	N	N	2.4	0	0	0	0
PgB01	4113857	4130626	PgB01_g248_t14	-	2119	15	transmembrane 9 superfamily member 2			N	N	N	19.6	34.1	29.4	20.4	9.9
PgB01	4113857	4131771	PgB01_g248_t15	-	3367	15	transmembrane 9 superfamily member 2			N	N	N	13.4	22.4	18.7	13.6	6.6
PgB01	4141258	4158129	PgB01_g249_t01	+	2059	11	Acetylcholine receptor subunit alpha-like protein	SL		N	Y	N	5.5	13.6	7.1	12.9	10.1
PgB01	4141258	4158129	PgB01_g249_t02	+	2184	12	Acetylcholine receptor subunit alpha-like protein	SL		N	N	Y	5.4	13.9	7.4	12.7	9.7
PgB01	4149353	4158129	PgB01_g249_t03	+	2104	7	acetylcholine receptor subunit alpha-type unc-38			N	N	N	4.1	12.7	4.5	7.2	5.8
PgB01	4151366	4158129	PgB01_g249_t04	+	1363	8	Acetylcholine receptor subunit alpha-like protein			N	N	N	5.9	19.6	9.1	10	8
PgB01	4151666	4158129	PgB01_g249_t05	+	1158	6	acetylcholine receptor subunit alpha-type unc-38			N	N	N	5.8	20.4	9.2	10.8	7.4
PgB01	4142527	4145616	PgB01_g250_t01	-	1006	4	Cuticle collagen dpy-7			N	Y	Y	1.9	0.9	2.7	0.1	0.1
PgB01	4162243	4162642	PgB01_g251_t01	-	216	2	hypothetical protein			Y	Y	Y	0	0	0	0	0
PgB02X	4031	4408	PgB02X_g001_t01	.	378	1	Ubiquitin-conjugating enzyme E2 variant 2			N	Y	Y	0.8	0.5	0	1.9	0.5
PgB02X	10935	11634	PgB02X_g002_t01	.	700	1	hypothetical protein			N	Y	Y	0.9	0	0	0	0.5
PgB02X	12510	29151	PgB02X_g003_t01	-	1330	4	Calmodulin	SL		N	N	Y	6.1	12.4	1.4	0.8	14.7
PgB02X	18958	23518	PgB02X_g003_t02	-	323	3	Calmodulin	SL		N	Y	N	10.5	26.3	4.9	2.7	32.5
PgB02X	35232	59522	PgB02X_g004_t01	-	2935	11	ETSous factor			N	N	N	1.9	14.8	7.7	12.4	5.8
PgB02X	35613	49131	PgB02X_g004_t02	-	3261	10	ETSous factor			N	Y	Y	1.9	13.8	7.7	11.6	5.2
PgB02X	35613	59522	PgB02X_g004_t03	-	2957	11	ETSous factor			N	N	N	2	15.3	8.5	12.8	5.7
PgB02X	78583	87371	PgB02X_g005_t01	+	1509	8	dna damage-regulated autophagy modulator protein 2	SL		N	Y	N	3.9	17.5	6.7	4.8	10.3
PgB02X	79383	87371	PgB02X_g005_t02	+	1784	7	dna damage-regulated autophagy modulator protein 2	SL		N	N	Y	3.3	14.7	4.6	3.8	8.7
PgB02X	90990	113996	PgB02X_g006_t01	+	7760	22	ubiquitin carboxyl-terminal hydrolase 31	SL	Telo	N	N	Y	2.9	7.2	3.6	10.4	9.1
PgB02X	92138	93640	PgB02X_g006_t02	+	1503	1	ubiquitin carboxyl-terminal hydrolase 31	SL		N	N	N	0	2.1	2	2	2.3
PgB02X	92138	95022	PgB02X_g006_t03	+	1319	2	ubiquitin carboxyl-terminal hydrolase 31	SL		N	N	N	0.2	3.8	2.2	2.9	3.8
PgB02X	92410	106863	PgB02X_g006_t04	+	2775	18	ubiquitin carboxyl-terminal hydrolase 31	SL		N	N	N	2.9	12.2	7	17.8	7.3
PgB02X	92410	108033	PgB02X_g006_t05	+	2886	19	ubiquitin carboxyl-terminal hydrolase 31	SL		N	Y	N	3	12	7.4	17.7	7.2
PgB02X	92410	113996	PgB02X_g006_t06	+	6343	22	ubiquitin carboxyl-terminal hydrolase 31	SL	Telo	N	N	N	3.5	8.8	4.4	12.6	11
PgB02X	95194	95820	PgB02X_g006_t07	+	627	1	hypothetical protein			N	N	N	0.2	1.8	2.5	3.9	1.9
PgB02X	98041	113996	PgB02X_g006_t08	+	6485	15	ubiquitin carboxyl-terminal hydrolase 31		Telo	N	N	N	3.3	6.2	2.7	11.2	9.7
PgB02X	112348	126866	PgB02X_g007_t01	-	4289	15	6-phosphofructokinase		Telo	N	Y	Y	20.6	20.2	16.1	61.2	99.8
PgB02X	129977	143947	PgB02X_g008_t01	+	4206	19	exocyst complex component 1	SL		N	N	Y	8.4	28.7	25.5	6	2.8
PgB02X	132468	143947	PgB02X_g008_t02	+	2855	18	exocyst complex component 1	SL		N	Y	N	12.1	42.3	36.7	8.5	4.1
PgB02X	147364	161557	PgB02X_g009_t01	+	1167	5	Uncharacterized protein B0310.1		Telo	N	Y	Y	0	0.8	3.3	0.7	36.2
PgB02X	162655	165344	PgB02X_g010_t01	-	680	4	Fibroblast growth factor 17			N	Y	Y	0	2	1.9	2.5	0
PgB02X	207904	211986	PgB02X_g011_t01	+	1386	5	fmrfamide receptor			N	Y	Y	2.4	0.4	1.9	30.5	6.4
PgB02X	212193	218634	PgB02X_g012_t01	-	1816	4	fmrfamide receptor		Telo	N	Y	Y	1.7	9.3	4.7	19.2	32.3
PgB02X	224061	224605	PgB02X_g013_t01	-	249	3	hypothetical protein			N	Y	Y	0	0	0	0	0.4
PgB02X	228533	235525	PgB02X_g014_t01	-	1789	10	Negative elongation factor A			N	Y	N	1.7	8.1	9.8	3.4	0.9
PgB02X	228533	235525	PgB02X_g014_t02	-	1795	10	Negative elongation factor A			N	N	Y	1.7	8	9.8	3.4	0.9
PgB02X	240504	246906	PgB02X_g015_t01	+	1737	6	vang-like protein 1			N	Y	Y	7.6	25.8	21.5	0.8	0.6
PgB02X	250054	253645	PgB02X_g016_t01	-	633	5	Female germline-specific tumor suppressor gld-1			N	N	N	77	25.9	16.4	2.7	4.3
PgB02X	251189	259382	PgB02X_g016_t02	-	1402	10	Female germline-specific tumor suppressor gld-1	SL		N	Y	Y	92.2	29.3	14.6	2.4	2.7
PgB02X	268424	269658	PgB02X_g017_t01	+	303	2	hypothetical protein			N	Y	Y	0	0	0	0	0
PgB02X	274711	295999	PgB02X_g018_t01	+	3487	21	Ubiquitin carboxyl-terminal hydrolase 7			N	Y	N	28.8	39.1	33.8	35.2	27.8
PgB02X	274711	301323	PgB02X_g018_t02	+	4274	26	Ubiquitin carboxyl-terminal hydrolase 7			N	N	Y	27.9	36.2	31.6	32.3	26.2
PgB02X	274711	301323	PgB02X_g018_t03	+	4265	26	Ubiquitin carboxyl-terminal hydrolase 7			N	N	N	27.9	36.3	31.7	32.3	26.3
PgB02X	274764	283257	PgB02X_g018_t04	+	784	7	Ubiquitin carboxyl-terminal hydrolase 7			N	N	N	27.2	57.1	45.7	38.6	27.3
PgB02X	285523	301323	PgB02X_g018_t05	+	3277	17	Ubiquitin carboxyl-terminal hydrolase 7			N	N	N	24.2	25.9	23.2	27.3	22.1
PgB02X	296132	301323	PgB02X_g018_t06	+	1742	5	Ubiquitin carboxyl-terminal hydrolase 7			N	N	N	10.3	10.3	9.3	7.9	8.4
PgB02X	296132	301323	PgB02X_g018_t07	+	1733	5	Ubiquitin carboxyl-terminal hydrolase 7			N	N	N	10.3	10.3	9.3	7.9	8.4
PgB02X	303032	321358	PgB02X_g019_t01	+	2406	10	cre-lpr-3 protein		Telo	N	N	N	1.4	12.1	28.9	0.2	0.8
PgB02X	315771	321358	PgB02X_g019_t02	+	2425	9	cre-lpr-3 protein			N	N	Y	1.2	12	28.7	0.2	0.7
PgB02X	316218	321358	PgB02X_g019_t03	+	2228	8	cre-lpr-3 protein			N	Y	N	1.1	10.5	26.3	0.1	0.7
PgB02X	321711	332239	PgB02X_g020_t01	+	2583	14	cre-lpr-6 protein	SL		N	Y	Y	0.5	35.4	35.1	1	0.4
PgB02X	336840	339895	PgB02X_g021_t01	+	565	2	ocalin-related protein family member (lpr-4)			N	Y	Y	0	0	3.3	0.3	0
PgB02X	347195	360601	PgB02X_g022_t01	-	3742	12	ocalin-related protein family member (lpr-4)	SL		N	Y	Y	10.1	12.7	12.3	11.5	2.5
PgB02X	372744	383907	PgB02X_g023_t01	+	3541	13	adp-ribosylation factor-binding protein gga3			N	Y	Y	2.2	2.8	2.1	3.8	2
PgB02X	373206	381086	PgB02X_g023_t02	+	2428	10	adp-ribosylation factor-binding protein gga3			N	N	N	2.7	2.9	0.8	4.4	1.6
PgB02X	373827	383907	PgB02X_g023_t03	+	2049	14	adp-ribosylation factor-binding protein gga3			N	N	N	3.1	4.3	2.5	4.7	3.4
PgB02X	375971	383907	PgB02X_g023_t04	+	2932	9	adp-ribosylation factor-binding protein gga3			N	N	N	2	2.8	1.5	2.9	2.3
PgB02X	385120	387557	PgB02X_g024_t01	+	582	3	cre-lpr-3 protein		Telo	N	Y	Y	0.4	5.7	15.9	0.4	0.5
PgB02X	389119	396559	PgB02X_g025_t01	-	1452	9	putative nadh dehydrogenase iron-sulfur protein			N	Y	Y	95	223.5	43.8	102.5	102.5
PgB02X	399316	415444	PgB02X_g026_t01	+	958	5	dexamethasone-induced 1	SL		N	N	N	4.6	0.1	0	0	0.6
PgB02X	400146	415444	PgB02X_g026_t02	+	1286	5	dexamethasone-induced 1	SL		N	Y	Y	4.7	0.1	0	0	0.5
PgB02X	422908	435088	PgB02X_g027_t01	+	2417	15	Protein HID1	SL		N	Y	Y	6.5	16.5	24.4	15	6.7
PgB02X	436312	437002	PgB02X_g028_t01	.	691	1	hypothetical protein			N	Y	Y	3.8	9.5	13.2	1.1	3.3
PgB02X	439073	443860	PgB02X_g029_t01	+	1538	3	Ras-related protein Rab-1A	SL		N	N	N	0.5	6.8	10.7	1.8	1
PgB02X	439073	443860	PgB02X_g029_t02	+	4244	2	Ras-related protein Rab-1A	SL		N	N	Y	0.2	2.8	4.7	1.1	1.4
PgB02X	439073	444435	PgB02X_g029_t03	+	3516	3	Ras-related protein Rab-1A	SL		N	N	N	0.2	3.5	4.6	1.2	1.5
PgB02X	439073	444435	PgB02X_g029_t04	+	810	4	Ras-related protein Rab-1A	SL		N	Y	N	0.8	13.6	15.6	3.1	1.2
PgB02X	450731	455654	PgB02X_g030_t01	+	1150	6	ADP-ribosylation factor-like protein 1	SL	Telo	N	Y	Y	2.4	15.4	11.2	6.6	2
PgB02X	455216	465372	PgB02X_g031_t01	-	2052	12	Palmitoyltransferase ZDHHC17	SL	Telo	N	Y	Y	13.4	112.6	60.9	72.9	23
PgB02X	465594	473968	PgB02X_g032_t01	+	1219	6	Uncharacterized protein F59B10.3		Telo	N	N	Y	8.3	17.5	14.7	2.4	12.1
PgB02X	465594	473968	PgB02X_g032_t02	+	995	6	Uncharacterized protein F59B10.3		Telo	N	N	N	10.1	21.4	18	3	14.6
PgB02X	465594	473968	PgB02X_g032_t03	+	1048	6	Uncharacterized protein F59B10.3		Telo	N	N	N	9.7	20.6	18.8	2.8	13.4
PgB02X	465594	473968	PgB02X_g032_t04	+	1033	6	Uncharacterized protein F59B10.3		Telo	N	Y	N	9.9	20.9	19.1	2.9	13.4
PgB02X	465600	473968	PgB02X_g032_t05	+	855	6	Uncharacterized protein F59B10.3		Telo	N	N	N	10.3	22.3	18.9	3.5	13.7
PgB02X	478488	502448	PgB02X_g033_t01	+	5611	26	Serine/threonine-protein kinase kin-29	SL		N	Y	Y	17.1	80.9	32.1	22.9	17.7
PgB02X	478590	502448	PgB02X_g033_t02	+	5168	28	Serine/threonine-protein kinase kin-29	SL		N	N	N	17.8	84.3	32.9	24.7	18.8
PgB02X	485836	502448	PgB02X_g033_t03	+	3926	19	Serine/threonine-protein kinase kin-29	SL		N	N	N	18.6	85.6	32.3	29.3	22.9
PgB02X	485836	502448	PgB02X_g033_t04	+	3926	20	Serine/threonine-protein kinase kin-29	SL		N	N	N	18.6	85.6	32.3	29.3	22.9
PgB02X	486062	502448	PgB02X_g033_t05	+	3627	20	Serine/threonine-protein kinase kin-29	SL		N	N	N	20	89.7	34.7	31.1	23.4
PgB02X	495507	497397	PgB02X_g033_t06	+	190	2	Serine/threonine-protein kinase kin-29			N	N	N	21.2	59	33.1	21.9	14.5
PgB02X	502956	504263	PgB02X_g034_t01	-	753	3	hypothetical protein	SL		N	N	N	2.5	0	13.7	19.8	4.6
PgB02X	502956	507000	PgB02X_g034_t02	-	1070	5	hypothetical protein	SL		N	N	N	2.5	0.2	23.4	22.7	4.6
PgB02X	502956	507494	PgB02X_g034_t03	-	1810	6	hypothetical protein	SL		N	Y	Y	1.9	0.1	16.7	21.2	3.9
PgB02X	515486	518519	PgB02X_g035_t01	+	675	5	Cytosolic purine 5'-nucleotidase	SL		N	Y	Y	4	14.3	8.9	0.3	1.4
PgB02X	520867	522117	PgB02X_g036_t01	-	1251	1	Transposon-derived protein			N	N	N	0	0	0.1	0.4	0.4
PgB02X	520867	531187	PgB02X_g036_t02	-	2296	11	bestrophin-1	SL		N	Y	Y	0.5	11.2	8.7	14.1	5.3
PgB02X	538128	543408	PgB02X_g037_t01	+	1369	9	Uncharacterized protein B0035.15	SL		N	Y	Y	2.1	5.4	1.3	1.3	1.4
PgB02X	543520	551333	PgB02X_g038_t01	+	2646	9	tRNA-specific 2-thiouridylase 1		Telo	N	Y	Y	1.8	9.2	2.3	0.8	2
PgB02X	543520	551333	PgB02X_g038_t02	+	2611	9	tRNA-specific 2-thiouridylase 1		Telo	N	N	N	1.7	9.1	2.3	0.8	2
PgB02X	544406	551333	PgB02X_g038_t03	+	1753	9	tRNA-specific 2-thiouridylase 1			N	N	N	2.6	12.5	3.5	1.2	2.5
PgB02X	552430	555662	PgB02X_g039_t01	-	1005	6	hypothetical protein		Telo	N	Y	Y	60.4	1770.1	15.3	14.2	7.4
PgB02X	557043	567122	PgB02X_g040_t01	+	2371	8	RNA-binding protein 39		Telo	N	N	Y	15.4	677.7	1	3.4	1.5
PgB02X	557395	567122	PgB02X_g040_t02	+	2253	8	RNA-binding protein 39		Telo	N	Y	N	16.3	713.1	1.1	3.5	1.5
PgB02X	561174	567122	PgB02X_g040_t03	+	2319	5	RNA-binding protein 39		Telo	N	N	N	15.1	654.1	1	3.4	1.5
PgB02X	567928	578367	PgB02X_g041_t01	-	1999	16	RNA-binding protein 39			N	Y	Y	7.7	12.6	14.9	7.8	1.8
PgB02X	597419	605739	PgB02X_g042_t01	+	1315	7	arrestin domain-containing protein 3			N	Y	Y	0.1	1.7	1.3	0	0.4
PgB02X	607556	611637	PgB02X_g043_t01	-	573	6	phytanoyl- dioxygenase domain-containing protein 1-like protein			N	N	N	0.1	12.1	24.7	0	0.6
PgB02X	607556	612751	PgB02X_g043_t02	-	1091	8	phytanoyl- dioxygenase domain-containing protein 1-like protein	SL		N	Y	Y	0.1	13.1	22.6	0.1	0.6
PgB02X	611256	612751	PgB02X_g043_t03	-	891	3	phytanoyl- dioxygenase domain-containing protein 1-like protein	SL		N	N	N	0	8.5	12.8	0.1	0.3
PgB02X	615533	635680	PgB02X_g044_t01	-	4053	24	Contactin			N	Y	Y	0.7	1.9	1.6	0.2	1.7
PgB02X	673983	680857	PgB02X_g045_t01	-	1468	8	dual specificity mitogen-activated protein kinase kinase hemipterous	SL	Telo	N	N	N	5.7	35.1	12.6	36.8	23.3
PgB02X	673983	681057	PgB02X_g045_t02	-	1700	8	dual specificity mitogen-activated protein kinase kinase hemipterous	SL	Telo	N	N	N	5.6	33	11.3	39.3	21.5
PgB02X	673983	681057	PgB02X_g045_t03	-	2068	8	dual specificity mitogen-activated protein kinase kinase hemipterous	SL	Telo	N	Y	Y	5.1	30.1	10.2	34.8	19.9
PgB02X	684877	690654	PgB02X_g046_t01	+	866	7	Proline dehydrogenase			N	N	N	0.3	0.9	0	0	6.7
PgB02X	684877	695145	PgB02X_g046_t02	+	2264	14	Proline dehydrogenase			N	Y	Y	0.1	0.6	0.4	1	6.5
PgB02X	725931	732422	PgB02X_g047_t01	+	2741	6	hypothetical protein	SL		N	Y	Y	6.7	33.4	7	0.5	4.4
PgB02X	726881	732924	PgB02X_g047_t02	+	1567	6	hypothetical protein	SL		N	N	N	11.5	56.8	12.3	0.8	7.6
PgB02X	731903	732422	PgB02X_g047_t03	+	520	1	hypothetical protein			N	N	N	0.7	4.6	6.6	0	1
PgB02X	746837	747297	PgB02X_g048_t01	.	461	1	hypothetical protein			N	Y	Y	1	9.9	14.9	0	1.5
PgB02X	749728	760474	PgB02X_g049_t01	-	2722	16	monocarboxylate transporter 5			N	Y	N	2.7	15.7	21.5	2.1	4.5
PgB02X	749728	760789	PgB02X_g049_t02	-	3172	17	monocarboxylate transporter 5			N	N	Y	2.3	13.9	18.5	2.1	4
PgB02X	779438	779775	PgB02X_g050_t01	.	338	1	hypothetical protein			N	Y	Y	0	0	5.5	0	0
PgB02X	788535	806400	PgB02X_g051_t01	+	3398	21	Eukaryotic translation initiation factor 2-alpha kinase			N	Y	Y	11.3	28.7	15.8	20.6	12
PgB02X	809328	850566	PgB02X_g052_t01	+	6622	35	hypothetical protein	SL		N	Y	Y	3.2	8.4	4.7	7	2.4
PgB02X	818221	850566	PgB02X_g052_t02	+	6128	33	hypothetical protein	SL		N	N	N	3.5	8.8	4.8	7.6	2.5
PgB02X	855021	862266	PgB02X_g053_t01	-	1030	5	hypothetical protein	SL		N	Y	Y	1.4	22.6	9.4	0	3.5
PgB02X	888850	895484	PgB02X_g054_t01	-	2819	6	cre-tsp-9 protein	SL	Telo	N	N	N	9.6	53.6	42.4	27.7	21.5
PgB02X	888850	895665	PgB02X_g054_t02	-	2186	6	cre-tsp-9 protein	SL	Telo	N	Y	N	12.3	68.9	54.6	35.6	27.6
PgB02X	888850	895935	PgB02X_g054_t03	-	3813	5	cre-tsp-9 protein	SL	Telo	N	N	Y	7.1	39.7	31.3	20.5	16
PgB02X	901783	906822	PgB02X_g055_t01	+	477	2	hypothetical protein	SL		N	Y	Y	0.1	0.5	0	0	1.7
PgB02X	908471	913629	PgB02X_g056_t01	-	4290	2	cuticlin-1			N	Y	Y	0	0	0.4	0	0.4
PgB02X	908471	913629	PgB02X_g057_t01	.	5159	1	cuticlin-1			N	Y	Y	0	0	0.2	0	0.4
PgB02X	915089	917743	PgB02X_g058_t01	-	1002	3	Duffy receptor beta form	SL	Telo	N	Y	N	0.1	0.8	0.8	5.4	827.7
PgB02X	915089	918332	PgB02X_g058_t02	-	2726	2	Duffy receptor beta form	SL	Telo	N	N	Y	0.2	0.6	1.1	3.1	541.8
PgB02X	916379	917127	PgB02X_g059_t01	+	674	2	Duffy receptor beta form		Telo	N	Y	Y	0.5	1.2	3.1	4.3	927.9
PgB02X	919943	920387	PgB02X_g060_t01	-	445	1	hypothetical protein			N	N	N	0.2	1.7	0	0	0
PgB02X	919943	929597	PgB02X_g060_t02	-	1509	9	neuropeptide receptor a8			N	Y	Y	0.4	0.9	2.4	0	1
PgB02X	919943	938202	PgB02X_g060_t03	-	1386	11	neuropeptide receptor a8			N	N	N	0.5	0.9	2.7	0	1.4
PgB02X	972109	981217	PgB02X_g061_t01	+	2372	16	Leucine-rich repeat neuronal protein 2	SL		N	Y	Y	1.4	1	4.6	1.1	2.4
PgB02X	972214	981217	PgB02X_g061_t02	+	2230	16	Leucine-rich repeat neuronal protein 2	SL		N	N	N	1.5	1	4.2	1.2	2.5
PgB02X	985457	989761	PgB02X_g062_t01	-	1272	5	hypothetical protein			N	Y	Y	0.2	0.7	2.7	0	0.3
PgB02X	996690	1004006	PgB02X_g063_t01	+	1648	10	tenascin	SL		N	Y	Y	2.1	18	30.9	0.4	53.4
PgB02X	1006836	1011651	PgB02X_g064_t01	-	1753	7	Stromal membrane-associated protein 2			N	Y	Y	5	16.1	20.2	21	9.4
PgB02X	1012962	1014876	PgB02X_g065_t01	-	621	3	Stromal membrane-associated protein 2			N	Y	Y	5.9	26.5	40.4	14.9	6.7
PgB02X	1035225	1036276	PgB02X_g066_t01	+	627	3	Homeobox protein vab-15			N	Y	Y	0.9	2	6	0	0.2
PgB02X	1038378	1038940	PgB02X_g067_t01	+	342	2	homeobox protein vab-15			N	Y	Y	0	0	0	0	0
PgB02X	1050277	1069759	PgB02X_g068_t01	-	4208	20	Tag-53			N	Y	Y	8.1	16.1	12.8	29.3	10.9
PgB02X	1070180	1070651	PgB02X_g069_t01	.	472	1	hypothetical protein			N	Y	Y	1.1	0.3	0	0.2	0
PgB02X	1071512	1086107	PgB02X_g070_t01	-	3117	19	putative cytoplasmic aconitate hydratase	SL		N	N	Y	9.4	77.1	34.4	12.4	9.6
PgB02X	1071512	1088426	PgB02X_g070_t02	-	3117	19	putative cytoplasmic aconitate hydratase	SL		N	N	N	9.4	77.1	34.4	12.4	9.6
PgB02X	1071512	1088426	PgB02X_g070_t03	-	3117	19	putative cytoplasmic aconitate hydratase	SL		N	Y	N	9.4	77.1	34.4	12.4	9.6
PgB02X	1090990	1095908	PgB02X_g071_t01	-	1768	6	ww domain-binding protein 11		Telo	N	Y	Y	20	131	75.3	20.6	10
PgB02X	1097866	1105765	PgB02X_g072_t01	+	1239	7	hypothetical protein	SL		N	Y	Y	4	37.2	28.5	5.4	1.5
PgB02X	1109673	1110400	PgB02X_g073_t01	.	728	1	hypothetical protein			N	Y	Y	0.5	0	0	0.1	0.2
PgB02X	1112809	1126084	PgB02X_g074_t01	-	2539	6	hypothetical protein			N	Y	Y	2.6	7.7	8	11.7	5.9
PgB02X	1112809	1126084	PgB02X_g074_t02	-	2452	5	hypothetical protein			N	N	N	2.8	7.9	7.5	11.4	6.3
PgB02X	1145393	1145985	PgB02X_g075_t01	.	593	1	hypothetical protein			N	Y	Y	0.7	0	0	0.4	0
PgB02X	1162918	1163235	PgB02X_g076_t01	.	318	1	hypothetical protein			N	Y	Y	0	0	0.3	3.1	0
PgB02X	1168293	1169809	PgB02X_g077_t01	+	1187	2	hypothetical protein			N	N	N	0.5	0	2.3	25.6	2.1
PgB02X	1168312	1169809	PgB02X_g077_t02	+	774	3	hypothetical protein			N	Y	N	1.2	0	3.8	47.3	3.2
PgB02X	1168455	1169809	PgB02X_g077_t03	+	961	2	hypothetical protein			N	N	N	1	0	2.2	30	2.6
PgB02X	1168542	1169809	PgB02X_g077_t04	+	932	2	hypothetical protein			N	N	N	0.5	0	2.1	21.6	2.4
PgB02X	1168590	1169809	PgB02X_g077_t05	+	1220	1	hypothetical protein			N	N	Y	0.4	0	1.6	17.3	1.9
PgB02X	1190023	1191757	PgB02X_g078_t01	+	1735	1	hypothetical protein	SL		N	N	Y	1.3	6.9	10.6	1.4	0.3
PgB02X	1190023	1195264	PgB02X_g078_t02	+	1544	3	hypothetical protein	SL		N	N	N	1.6	17.8	21.1	2	0.7
PgB02X	1190023	1196462	PgB02X_g078_t03	+	1474	4	hypothetical protein	SL		N	Y	N	2	22	26.2	2.1	1.1
PgB02X	1192704	1195264	PgB02X_g078_t04	+	881	2	hypothetical protein			N	N	N	1.1	16.3	15.5	0.9	0.7
PgB02X	1205239	1214767	PgB02X_g079_t01	+	2645	13	Cleft lip and palate transmembrane protein 1			N	Y	Y	5.8	11.9	15.3	4.8	1.8
PgB02X	1216830	1229139	PgB02X_g080_t01	-	1923	14	Neprilysin-1			N	Y	Y	0	0	0	0	0.2
PgB02X	1232925	1242281	PgB02X_g081_t01	-	1995	7	hypothetical protein			N	Y	Y	0	1	0.3	0	0
PgB02X	1240062	1240751	PgB02X_g082_t01	.	690	1	hypothetical protein			N	Y	Y	0	1.1	1.2	0	0
PgB02X	1240805	1244486	PgB02X_g083_t01	-	1199	6	hypothetical protein			N	Y	Y	0.3	1.6	1.5	0	0
PgB02X	1249170	1254364	PgB02X_g084_t01	-	928	8	Cuticlin-1	SL		N	Y	Y	0	12.4	17.9	0.5	0.1
PgB02X	1282720	1298749	PgB02X_g085_t01	+	2480	18	Metabotropic glutamate receptor 7			N	Y	Y	0.2	1	0.8	0	0.1
PgB02X	1301410	1329848	PgB02X_g086_t01	+	4593	22	Multidrug resistance-associated protein 1			N	N	N	1	18.7	9	0	2
PgB02X	1301410	1337417	PgB02X_g086_t02	+	6203	34	Multidrug resistance-associated protein 1			N	N	Y	1.6	19.7	9.3	0	1.4
PgB02X	1302146	1337417	PgB02X_g086_t03	+	5467	34	Multidrug resistance-associated protein 1			N	N	N	1.8	22.4	10.6	0	1.5
PgB02X	1302613	1313383	PgB02X_g086_t04	+	2267	13	Multidrug resistance-associated protein 1			N	Y	N	0.9	24.8	11.1	0	2.4
PgB02X	1302617	1322054	PgB02X_g086_t05	+	4205	24	Multidrug resistance-associated protein 1			N	N	N	9.2	23.7	16.1	3.1	2.2
PgB02X	1313505	1337417	PgB02X_g086_t06	+	2953	21	Multidrug resistance-associated protein 1			N	N	N	2.7	21.8	11.2	0	0.7
PgB02X	1314697	1315713	PgB02X_g086_t07	+	659	2	Multidrug resistance-associated protein 1			N	N	N	1.5	10.2	4.2	1.2	1.2
PgB02X	1316149	1337417	PgB02X_g086_t08	+	2201	16	Multidrug resistance-associated protein 1			N	N	N	2.9	20	10.3	0	0.6
PgB02X	1324253	1326531	PgB02X_g087_t01	.	2279	1	hypothetical protein			N	Y	Y	20.6	3.6	15	3.8	1.5
PgB02X	1338938	1340863	PgB02X_g088_t01	-	718	3	hypothetical protein			N	Y	Y	0.6	1.1	6	0	0
PgB02X	1345910	1349379	PgB02X_g089_t01	+	1145	6	hypothetical protein			N	Y	Y	1.3	82	62.7	0.4	0.3
PgB02X	1359999	1381730	PgB02X_g090_t01	+	4464	14	growth inhibition and differentiation-related protein 88-like protein			N	Y	Y	3	6.2	9.9	10.8	3.2
PgB02X	1390793	1395814	PgB02X_g091_t01	-	1196	3	Disks large 1 tumor suppressor protein			N	N	N	2.7	8.7	9.3	10.6	1.9
PgB02X	1390793	1434172	PgB02X_g091_t02	-	3454	19	Membrane-associated guanylate kinase, WW and PDZ domain-containing protein 1	SL		N	Y	Y	7.7	13.6	15.6	18	5.8
PgB02X	1422010	1422366	PgB02X_g092_t01	.	357	1	hypothetical protein			N	Y	Y	1.1	0	5.6	0	0
PgB02X	1447524	1459509	PgB02X_g093_t01	+	3366	12	Histidyl-tRNA synthetase	SL		N	Y	Y	5	14.1	13	13.1	6.8
PgB02X	1447681	1448350	PgB02X_g093_t02	+	670	1	Histidyl-tRNA synthetase			N	N	N	3	3.1	5.3	3.1	2.1
PgB02X	1447794	1459509	PgB02X_g093_t03	+	3346	12	Histidyl-tRNA synthetase	SL		N	N	N	4.9	13.9	12.6	13.2	6.5
PgB02X	1462551	1472384	PgB02X_g094_t01	-	3387	10	hypothetical protein	SL		N	Y	Y	4.4	24.9	19.2	8.4	3.2
PgB02X	1480756	1485549	PgB02X_g095_t01	-	1471	4	udp-n-acetylglucosamine transferase subunit alg13-like protein			N	N	Y	1.8	3.2	1.1	2.6	1.2
PgB02X	1480756	1486121	PgB02X_g095_t02	-	1159	5	udp-n-acetylglucosamine transferase subunit alg13-like protein			N	N	N	2.2	6.9	3.5	2.4	1.2
PgB02X	1480756	1488168	PgB02X_g095_t03	-	1120	6	udp-n-acetylglucosamine transferase subunit alg13-like protein			N	Y	N	2.5	6.9	4.2	2.5	1.3
PgB02X	1482396	1504583	PgB02X_g096_t01	+	695	2	hypothetical protein	SL	Telo	N	Y	Y	6.2	38.8	17.6	3.7	3.6
PgB02X	1488652	1498029	PgB02X_g097_t01	-	3476	12	hypothetical protein	SL	Telo	N	Y	Y	31.3	12.1	1.7	1.2	0.4
PgB02X	1488652	1498029	PgB02X_g097_t02	-	2265	12	hypothetical protein	SL	Telo	N	N	N	43	18.4	2.6	1.9	0.7
PgB02X	1488652	1498029	PgB02X_g097_t03	-	2328	13	hypothetical protein	SL	Telo	N	N	N	43.7	18.1	2.5	1.8	0.7
PgB02X	1488652	1498029	PgB02X_g097_t04	-	2328	14	hypothetical protein	SL	Telo	N	N	N	43.7	18.1	2.5	1.8	0.7
PgB02X	1488652	1498029	PgB02X_g097_t05	-	2265	13	hypothetical protein	SL	Telo	N	N	N	43	18.4	2.6	1.9	0.7
PgB02X	1499580	1506143	PgB02X_g098_t01	+	1049	6	UDP-N-acetylglucosamine transferase subunit ALG13			N	N	N	1.7	8.2	5	2.5	2
PgB02X	1500116	1506143	PgB02X_g098_t02	+	1282	6	UDP-N-acetylglucosamine transferase subunit ALG13			N	N	Y	1.2	6.7	4.6	1.8	1.3
PgB02X	1500744	1506143	PgB02X_g098_t03	+	1182	5	UDP-N-acetylglucosamine transferase subunit ALG13			N	Y	N	1.2	5.4	4.1	2	1.5
PgB02X	1500758	1506143	PgB02X_g098_t04	+	1241	5	UDP-N-acetylglucosamine transferase subunit ALG13			N	N	N	1.1	6.1	4.8	2	1.4
PgB02X	1511072	1512663	PgB02X_g099_t01	-	1022	3	cuticlin-1			N	Y	Y	0	2	3.9	0	0
PgB02X	1522011	1532061	PgB02X_g100_t01	+	2547	8	putative gene 48 protein			N	N	Y	3.6	1.4	0.1	0.1	0
PgB02X	1522011	1532061	PgB02X_g100_t02	+	2538	8	putative gene 48 protein			N	Y	N	3.6	1.4	0.1	0.1	0
PgB02X	1534924	1540827	PgB02X_g101_t01	-	1509	4	hypothetical protein			N	Y	Y	0.4	0.1	0	0	0
PgB02X	1546497	1554889	PgB02X_g102_t01	+	1212	10	Coiled-coil domain-containing protein 149			N	Y	Y	0.3	0.4	0	0	0.1
PgB02X	1554747	1590271	PgB02X_g103_t01	-	5227	25	agrin			N	N	Y	0.1	0.3	0.4	0	1.5
PgB02X	1556683	1590271	PgB02X_g103_t02	-	5126	24	agrin			N	Y	N	0	0.3	0.4	0	1.6
PgB02X	1602075	1607305	PgB02X_g104_t01	+	1615	6	39S ribosomal protein L41			N	Y	Y	14.8	42.9	45.3	30.5	29.8
PgB02X	1607381	1619358	PgB02X_g105_t01	-	3044	11	Fatty acyl-CoA reductase		Telo	N	Y	Y	14.9	49.8	33.1	89.7	52.9
PgB02X	1637634	1646280	PgB02X_g106_t01	+	1494	8	Uncharacterized protein F36G3.1			N	Y	Y	3.5	7	0.2	1.1	9.3
PgB02X	1647112	1649544	PgB02X_g107_t01	+	1269	3	Uncharacterized protein F36G3.1			N	Y	Y	1.5	1.2	0	0.2	3.7
PgB02X	1693838	1695046	PgB02X_g108_t01	-	592	2	putative g-protein coupled receptor			N	Y	Y	0	0	0	0	1.1
PgB02X	1693999	1701153	PgB02X_g109_t01	-	579	4	putative g-protein coupled receptor			N	Y	Y	0	0	0	0	0.3
PgB02X	1702938	1703606	PgB02X_g110_t01	-	669	1	putative g-protein coupled receptor			N	Y	Y	0	0	0	0	0
PgB02X	1729995	1742134	PgB02X_g111_t01	+	2142	9	ectonucleotide pyrophosphatase phosphodiesterase family member 6			N	Y	Y	0	0.3	0.3	0	2.2
PgB02X	1742199	1753115	PgB02X_g112_t01	-	6477	7	ectonucleotide pyrophosphatase phosphodiesterase family member 6			N	N	Y	0.1	0	0.6	2	0.4
PgB02X	1743066	1744459	PgB02X_g112_t02	-	1058	2	ectonucleotide pyrophosphatase phosphodiesterase family member 6			N	N	N	0	0	1.7	1.1	0.9
PgB02X	1743415	1747258	PgB02X_g112_t03	-	3027	3	ectonucleotide pyrophosphatase phosphodiesterase family member 6			N	Y	N	0	0	0.7	1.1	0.5
PgB02X	1755539	1763870	PgB02X_g113_t01	-	1669	8	hypothetical protein	SL		N	N	Y	0.9	0	3.6	22.4	4.2
PgB02X	1755539	1763870	PgB02X_g113_t02	-	1275	10	hypothetical protein	SL		N	N	N	1	0.1	5.9	29.8	5.8
PgB02X	1755539	1763875	PgB02X_g113_t03	-	1191	9	hypothetical protein	SL		N	N	N	1	0.1	6.2	30.9	5.7
PgB02X	1755539	1764334	PgB02X_g113_t04	-	1667	9	hypothetical protein	SL		N	Y	N	0.7	0.1	4.4	23.4	4.5
PgB02X	1775422	1790935	PgB02X_g114_t01	+	10346	13	Lysine histidine transporter 1			N	Y	Y	1.7	36.5	0.4	0.2	13.6
PgB02X	1793375	1798146	PgB02X_g115_t01	-	531	4	domon domain-containing protein			N	Y	Y	1.4	1.3	0	0.4	0.5
PgB02X	1797383	1808379	PgB02X_g116_t01	+	2669	13	trehalase	SL		N	Y	N	11.4	35.4	24.5	25.4	9.6
PgB02X	1797383	1808379	PgB02X_g116_t02	+	2732	13	trehalase	SL		N	N	Y	11.5	35.1	24	25.9	9.7
PgB02X	1809594	1812764	PgB02X_g117_t01	-	987	4	DOMON domain-containing protein			N	Y	Y	3.3	7.1	7.2	7.8	4.4
PgB02X	1814338	1844905	PgB02X_g118_t01	-	2453	7	hypothetical protein	SL		N	Y	N	1.5	18.9	5.3	11.5	4.4
PgB02X	1814338	1844905	PgB02X_g118_t02	-	2472	7	hypothetical protein	SL		N	N	Y	1.4	18.8	5.3	11.4	4.4
PgB02X	1815843	1831595	PgB02X_g118_t03	-	2259	4	hypothetical protein	SL		N	N	N	1.2	17	4.9	9.7	2.9
PgB02X	1815843	1844905	PgB02X_g118_t04	-	1958	6	hypothetical protein	SL		N	N	N	1.2	19.6	5.7	11.6	3.7
PgB02X	1852313	1869057	PgB02X_g119_t01	-	2483	13	CRAL-TRIO domain-containing protein	SL		N	Y	Y	10	89.9	45.3	11.4	13.5
PgB02X	1884538	1947771	PgB02X_g120_t01	+	3457	21	FYVE, RhoGEF and PH domain-containing protein 4	SL		N	Y	N	6.8	43	8	19.8	19.7
PgB02X	1911696	1947225	PgB02X_g120_t02	+	5818	18	FYVE, RhoGEF and PH domain-containing protein 4			N	N	N	4	25.1	5.9	12.3	12.5
PgB02X	1911696	1947771	PgB02X_g120_t03	+	5206	19	FYVE, RhoGEF and PH domain-containing protein 4			N	N	N	4.6	28.2	5.8	13.5	13.3
PgB02X	1914218	1947225	PgB02X_g120_t04	+	9903	17	FYVE, RhoGEF and PH domain-containing protein 4			N	N	Y	2.4	15	3.2	7.9	7.6
PgB02X	1947846	2009813	PgB02X_g121_t01	-	12309	63	Neurogenic locus notch protein 1			N	N	N	1.8	0.5	2.7	15.2	4.8
PgB02X	1947846	2009871	PgB02X_g121_t02	-	14428	63	Neurogenic locus notch protein 1			N	N	Y	1.6	0.4	2.4	13.2	4.3
PgB02X	1947846	2009871	PgB02X_g121_t03	-	12404	64	Neurogenic locus notch protein 1			N	N	N	1.7	0.5	2.7	14.9	4.9
PgB02X	1947846	2009871	PgB02X_g121_t04	-	13748	64	Neurogenic locus notch protein 1			N	N	N	1.7	0.5	2.5	13.7	4.4
PgB02X	1947846	2009871	PgB02X_g121_t05	-	11103	67	and ph domain-containing protein 1			N	Y	N	1.9	0.6	2.9	16.3	5.3
PgB02X	1962230	2009813	PgB02X_g121_t06	-	9491	48	Neurogenic locus notch protein 1			N	N	N	1.5	0.4	2	13.3	4.2
PgB02X	1980774	1999776	PgB02X_g121_t07	-	3954	22	and ph domain-containing protein 1			N	N	N	1.5	0.1	2.7	15.9	3.9
PgB02X	1999914	2007796	PgB02X_g121_t08	-	2328	7	Sushi, von Willebrand factor type A, EGF and pentraxin domain-containing protein 1			N	N	N	1.1	0.2	0.4	9.4	4
PgB02X	2013924	2021203	PgB02X_g122_t01	-	590	4	Visual system homeobox 1		Telo	N	Y	Y	14.2	0	0	0	0.8
PgB02X	2030029	2040146	PgB02X_g123_t01	-	2662	6	Mps one binder kinase activator-like protein1B	SL	Telo	N	N	N	20.9	89.4	60.6	17.9	27
PgB02X	2030029	2040146	PgB02X_g123_t02	-	2169	6	Mps one binder kinase activator-like protein1B	SL	Telo	N	Y	N	25.2	107.5	73.5	21.1	33
PgB02X	2030029	2040146	PgB02X_g123_t03	-	6158	5	Mps one binder kinase activator-like protein1B	SL	Telo	N	N	Y	9.8	39	26.5	8.9	12
PgB02X	2041261	2048401	PgB02X_g124_t01	-	1266	6	Serine/threonine-protein phosphatase 2A catalytic subunit beta isoform			N	Y	Y	8.4	31.1	20.4	24.6	32
PgB02X	2058777	2060186	PgB02X_g125_t01	-	886	2	hypothetical protein			N	N	N	1.9	12.6	14.5	6.6	1.1
PgB02X	2058777	2061731	PgB02X_g125_t02	-	774	2	hypothetical protein			N	N	N	1.7	17.4	17.3	7.6	1.3
PgB02X	2058777	2070252	PgB02X_g125_t03	-	2108	9	hypothetical protein			N	Y	Y	2.6	20.5	18.6	6.2	1.7
PgB02X	2062732	2070252	PgB02X_g125_t04	-	1794	6	hypothetical protein			N	N	N	2.2	14	14.4	4	1.3
PgB02X	2071543	2080867	PgB02X_g126_t01	+	949	7	Serine/threonine-protein kinase pelle	SL		N	Y	Y	29.4	56.7	22.3	23.8	8.4
PgB02X	2081062	2098185	PgB02X_g127_t01	+	3353	12	serine threonine-protein kinase pelle			N	Y	N	35	37.5	22.8	20.6	24.3
PgB02X	2081062	2105484	PgB02X_g127_t02	+	4918	22	serine threonine-protein kinase pelle			N	N	Y	14.7	32.9	16.3	10.8	7
PgB02X	2096351	2105484	PgB02X_g127_t03	+	2428	13	Serine/threonine-protein kinase pelle			N	N	N	5.7	22.4	6.4	4.2	3.9
PgB02X	2096351	2105484	PgB02X_g127_t04	+	2513	13	Serine/threonine-protein kinase pelle			N	N	N	5.7	22.1	5.9	4.5	4.2
PgB02X	2096351	2105484	PgB02X_g127_t05	+	2952	13	Serine/threonine-protein kinase pelle			N	N	N	5	16.2	4.7	4.2	3.2
PgB02X	2096536	2105484	PgB02X_g127_t06	+	2941	12	Serine/threonine-protein kinase pelle			N	N	N	5.5	17.9	4.5	4.6	3.6
PgB02X	2096536	2105484	PgB02X_g127_t07	+	2268	13	Serine/threonine-protein kinase pelle			N	N	N	6.2	24.1	6.4	4.5	4.1
PgB02X	2096536	2105484	PgB02X_g127_t08	+	2155	13	Serine/threonine-protein kinase pelle			N	N	N	5.7	23.6	6.9	5.1	4.4
PgB02X	2096696	2105484	PgB02X_g127_t09	+	2119	13	Serine/threonine-protein kinase pelle			N	N	N	6.2	24	7	5	4.4
PgB02X	2096696	2105484	PgB02X_g127_t10	+	2034	13	Serine/threonine-protein kinase pelle			N	N	N	6.3	24.5	7.6	4.7	4
PgB02X	2096696	2105484	PgB02X_g127_t11	+	2647	12	Serine/threonine-protein kinase pelle			N	N	N	5.6	17.7	5.2	4.4	3.2
PgB02X	2106652	2109189	PgB02X_g128_t01	-	1178	3	cuticle collagen 34	SL		N	Y	Y	1	1.2	3.9	1.2	0.5
PgB02X	2112749	2121463	PgB02X_g129_t01	-	1435	8	prostasin	SL		N	N	Y	1.2	1.7	1.2	30.1	6.2
PgB02X	2112749	2121463	PgB02X_g129_t02	-	1432	8	prostasin	SL		N	Y	N	1.2	1.7	1.2	30.1	6.2
PgB02X	2127415	2134288	PgB02X_g130_t01	+	1372	6	hypothetical protein	SL		N	N	Y	7.9	75.8	41.6	9.8	3.6
PgB02X	2127415	2134288	PgB02X_g130_t02	+	1238	6	hypothetical protein	SL		N	Y	N	8.6	79	44.3	10.9	3.6
PgB02X	2127426	2138487	PgB02X_g130_t03	+	664	7	hypothetical protein	SL		N	N	N	7.4	67.5	50.2	17.6	3.5
PgB02X	2127426	2139070	PgB02X_g130_t04	+	929	7	hypothetical protein	SL		N	N	N	5.5	54.5	38.3	12.5	3.1
PgB02X	2136437	2137314	PgB02X_g131_t01	.	878	1	hypothetical protein			N	Y	Y	1	0	0.6	1.5	0
PgB02X	2147359	2159374	PgB02X_g132_t01	+	2175	12	Protein-cysteine N-palmitoyltransferase Rasp		Telo	N	Y	Y	7.2	42.5	62.5	1.1	1.1
PgB02X	2163646	2172887	PgB02X_g133_t01	+	2118	11	rabenosyn-5			N	Y	Y	13.8	31.2	22	14.4	9.9
PgB02X	2163700	2172887	PgB02X_g133_t02	+	2037	11	Rabenosyn-5			N	N	N	13.7	31.2	20.9	13.3	9.8
PgB02X	2185230	2186749	PgB02X_g134_t01	+	217	2	hypothetical protein	SL		N	Y	N	0	3.3	0	0	0.2
PgB02X	2185230	2190975	PgB02X_g134_t02	+	1030	4	hypothetical protein	SL		N	N	Y	1.5	0.2	0	0.5	2.9
PgB02X	2194454	2226669	PgB02X_g135_t01	-	2687	13	protein ndrg1	SL		N	Y	Y	8	24.2	20.4	22.3	7.7
PgB02X	2194454	2226669	PgB02X_g135_t02	-	2616	13	protein ndrg1	SL		N	N	N	8.2	24.8	21	22.9	8
PgB02X	2212084	2223359	PgB02X_g135_t03	-	172	2	hypothetical protein			N	N	N	3.2	1.1	0	0	0.2
PgB02X	2231730	2242846	PgB02X_g136_t01	-	4183	7	39S ribosomal protein L2	SL		N	Y	Y	5.2	11.2	8.4	10.3	4.6
PgB02X	2246047	2259535	PgB02X_g137_t01	+	1600	4	hypothetical protein			N	N	N	2.3	20.7	35.6	45	17.2
PgB02X	2246047	2259535	PgB02X_g137_t02	+	1116	5	hypothetical protein			N	Y	N	3.5	31.9	54.4	68.7	27.2
PgB02X	2246047	2259535	PgB02X_g137_t03	+	1125	5	hypothetical protein			N	N	N	3.5	31.7	54	68.2	27.2
PgB02X	2253130	2259535	PgB02X_g137_t04	+	6078	2	hypothetical protein			N	N	Y	1.2	3.4	9.9	18.7	4.6
PgB02X	2253289	2259535	PgB02X_g137_t05	+	661	4	hypothetical protein			N	N	N	5.5	34.7	83.1	108.4	34.6
PgB02X	2253289	2259535	PgB02X_g137_t06	+	670	4	hypothetical protein			N	N	N	5.4	34.3	82	107	34.5
PgB02X	2253339	2259535	PgB02X_g137_t07	+	5385	3	hypothetical protein			N	N	N	1.4	4.3	11.9	21.2	5.8
PgB02X	2253339	2259535	PgB02X_g137_t08	+	5394	3	hypothetical protein			N	N	N	1.4	4.3	11.9	21.2	5.8
PgB02X	2262918	2263426	PgB02X_g138_t01	.	509	1	hypothetical protein			N	Y	Y	0	0	0.2	1.6	0.3
PgB02X	2266201	2277355	PgB02X_g139_t01	-	984	4	bzip transcription factor family protein			N	Y	N	0.6	9.5	6.8	0	0.3
PgB02X	2275489	2277355	PgB02X_g139_t02	-	1216	2	hypothetical protein			N	N	Y	0	0.6	4.3	0	1.5
PgB02X	2320155	2336800	PgB02X_g140_t01	+	1498	10	Tyramine receptor ser-2			N	Y	Y	0.6	1.5	2.6	0.5	0.1
PgB02X	2342915	2365651	PgB02X_g141_t01	-	2982	12	hypothetical protein			N	Y	Y	3.1	9	15.9	73.6	13.8
PgB02X	2352827	2364804	PgB02X_g141_t02	-	1650	8	hypothetical protein			N	N	N	3.9	15.9	13	6.7	3.3
PgB02X	2367018	2376671	PgB02X_g142_t01	+	1469	9	Thiamine pyrophosphate carrier			N	N	Y	1.2	4.2	6.2	2.9	1.4
PgB02X	2367954	2377397	PgB02X_g142_t02	+	1449	10	Thiamine pyrophosphate carrier			N	Y	N	1.4	5.3	8	2.4	1.1
PgB02X	2371464	2376671	PgB02X_g142_t03	+	754	7	Thiamine pyrophosphate carrier			N	N	N	1.9	5.2	6.3	4.3	1.3
PgB02X	2381398	2383037	PgB02X_g143_t01	+	1640	1	hypothetical protein			N	N	Y	1.1	0.2	0	0	0
PgB02X	2381398	2385120	PgB02X_g143_t02	+	883	3	hypothetical protein			N	Y	N	1.6	7.3	2.6	0	0
PgB02X	2381752	2383037	PgB02X_g143_t03	+	263	2	hypothetical protein			N	N	N	3.9	1.6	0	0	0
PgB02X	2393202	2396106	PgB02X_g144_t01	+	1931	4	Cuticle collagen 6		Telo	N	Y	Y	22.1	1.4	1.8	0.5	0.4
PgB02X	2398818	2418429	PgB02X_g145_t01	+	2180	14	filamin a-interacting protein 1-like protein	SL		N	Y	N	4.7	26.8	7.7	25.2	84.8
PgB02X	2398818	2420648	PgB02X_g145_t02	+	2718	15	filamin a-interacting protein 1-like protein	SL	Telo	N	N	N	4.1	23.5	8.3	21.1	77.2
PgB02X	2401526	2420648	PgB02X_g145_t03	+	3314	13	filamin a-interacting protein 1-like protein	SL	Telo	N	N	Y	3.6	20	6.8	17.3	62.9
PgB02X	2421454	2429103	PgB02X_g146_t01	-	2515	5	filamin a-interacting protein 1-like protein	SL		N	Y	Y	0.3	11.1	4.8	0.2	36.7
PgB02X	2440068	2449634	PgB02X_g147_t01	-	1735	5	Ras-related C3 botulinum toxin substrate 1	SL	Telo	N	Y	Y	33	118.3	79.5	31.6	34.9
PgB02X	2453619	2461321	PgB02X_g148_t01	-	2380	6	immunoglobulin i-set domain containing protein			N	N	N	1.3	2.8	0.9	1.4	8
PgB02X	2453906	2461928	PgB02X_g148_t02	-	2652	5	immunoglobulin i-set domain containing protein			N	Y	N	1.1	2.5	0.5	1.2	7.2
PgB02X	2453906	2462024	PgB02X_g148_t03	-	3114	5	immunoglobulin i-set domain containing protein			N	N	Y	0.9	2.7	0.4	1	6.3
PgB02X	2458506	2461041	PgB02X_g148_t04	-	281	2	hypothetical protein			N	N	N	1.7	0	0	0	3
PgB02X	2457292	2461321	PgB02X_g149_t01	+	1552	3	39S ribosomal protein L17			N	N	Y	0.6	3.4	3.5	0.1	2.3
PgB02X	2457292	2463027	PgB02X_g149_t02	+	1488	5	39S ribosomal protein L17			N	Y	N	0.5	6.3	6	0.9	3.4
PgB02X	2460290	2463027	PgB02X_g149_t03	+	968	3	39S ribosomal protein L17			N	N	N	0.9	6.3	3.7	1.2	2.5
PgB02X	2463204	2463567	PgB02X_g150_t01	.	364	1	hypothetical protein			N	Y	Y	6.3	47.2	13.6	2.5	6.2
PgB02X	2463761	2470128	PgB02X_g151_t01	-	820	6	39S ribosomal protein L17	SL		N	N	N	6.9	43.4	20.7	4.5	8.2
PgB02X	2463761	2470539	PgB02X_g151_t02	-	1169	5	39S ribosomal protein L17	SL		N	Y	Y	5	32	12.9	3.1	5.8
PgB02X	2464075	2470252	PgB02X_g151_t03	-	704	5	39S ribosomal protein L17	SL		N	N	N	7.8	48.8	18.2	2.3	8.6
PgB02X	2472666	2477183	PgB02X_g152_t01	-	1056	6	cre-mlt-8 protein	SL		N	Y	Y	0.5	8.1	6.9	2.7	3
PgB02X	2488655	2491519	PgB02X_g153_t01	-	360	3	Cytochrome b-c1 complex subunit 8	SL		N	N	N	64.6	314.2	89.5	63.7	88.9
PgB02X	2488655	2496139	PgB02X_g153_t02	-	1020	6	Transcription termination factor 2	SL		N	Y	Y	34.8	169.7	65.4	42.8	55.9
PgB02X	2496729	2497589	PgB02X_g154_t01	+	351	2	hypothetical protein			N	Y	Y	0	0	0	0	0
PgB02X	2501467	2505511	PgB02X_g155_t01	+	2324	2	ubiquitin-conjugating enzyme e2 2	SL		N	N	Y	17.3	43.4	44.3	43	26.5
PgB02X	2501536	2505511	PgB02X_g155_t02	+	1642	3	ubiquitin-conjugating enzyme e2 2	SL		N	Y	N	23.6	61.4	62.6	60.3	37.5
PgB02X	2506979	2515882	PgB02X_g156_t01	+	2585	9	Cysteine desulfurase			N	Y	Y	1.6	3.5	1.5	2.3	1.8
PgB02X	2511031	2513180	PgB02X_g156_t02	+	1196	3	Cysteine desulfurase			N	N	N	2.1	3.9	1.4	3.9	0.8
PgB02X	2511031	2513180	PgB02X_g156_t03	+	1346	3	Cysteine desulfurase			N	N	N	2.1	4.6	1.5	2.6	0.8
PgB02X	2511060	2513180	PgB02X_g156_t04	+	915	4	Cysteine desulfurase			N	N	N	2.8	5.9	2.2	3.9	1.3
PgB02X	2523300	2539815	PgB02X_g157_t01	-	3354	15	putative atp synthase subunit g	SL		N	Y	Y	4.5	5.5	12.7	36.5	7
PgB02X	2533485	2539777	PgB02X_g157_t02	-	1501	3	putative atp synthase subunit g			N	N	N	6	5.7	15.1	46.5	8.3
PgB02X	2539965	2540534	PgB02X_g158_t01	.	570	1	hypothetical protein			N	Y	Y	1	1	0	0	0
PgB02X	2544594	2549427	PgB02X_g159_t01	-	2080	3	ATP synthase subunit g 2		Telo	N	Y	Y	12	31.8	28.7	35.6	24.3
PgB02X	2552289	2562872	PgB02X_g160_t01	-	2180	14	serine threonine-protein kinase polo			N	N	N	1.2	62.8	14	4.2	0.7
PgB02X	2552289	2562974	PgB02X_g160_t02	-	2261	14	serine threonine-protein kinase polo			N	Y	Y	1.2	61.4	14	4.1	0.7
PgB02X	2565621	2582416	PgB02X_g161_t01	-	2653	13	serine threonine-protein kinase polo			N	Y	Y	10.1	36.4	23.7	29	7.4
PgB02X	2588516	2590317	PgB02X_g162_t01	.	1802	1	hypothetical protein			N	Y	Y	0.2	0	0	0.2	0
PgB02X	2609025	2611407	PgB02X_g163_t01	+	353	3	synaptotagmin-1			N	Y	Y	0	2	0	0	0
PgB02X	2614164	2625877	PgB02X_g164_t01	-	1483	10	synaptotagmin-1	SL		N	Y	Y	1.5	13.9	3.6	0	1.4
PgB02X	2635372	2643305	PgB02X_g165_t01	+	804	5	hypothetical protein			N	N	Y	7.6	48.7	53.6	13	5.4
PgB02X	2636107	2643305	PgB02X_g165_t02	+	798	5	hypothetical protein			N	Y	N	8	49.1	54	13.1	5.4
PgB02X	2653895	2676514	PgB02X_g166_t01	+	2682	13	hypothetical protein			N	N	Y	0.9	1.1	1.7	9	4.2
PgB02X	2653895	2677500	PgB02X_g166_t02	+	2659	13	hypothetical protein			N	Y	N	1.2	1.7	2	9.9	4.8
PgB02X	2653895	2677500	PgB02X_g166_t03	+	2269	14	hypothetical protein			N	N	N	1.5	2	2.3	10.8	5.7
PgB02X	2688314	2698142	PgB02X_g167_t01	+	1747	11	Major facilitator superfamily domain-containing protein 8	SL	Telo	N	Y	N	3.9	14.7	26.2	124.4	23.8
PgB02X	2688332	2698142	PgB02X_g167_t02	+	2429	10	Major facilitator superfamily domain-containing protein 8	SL	Telo	N	N	Y	2.9	10.4	18.5	88.6	16.8
PgB02X	2688334	2698142	PgB02X_g167_t03	+	2113	10	Major facilitator superfamily domain-containing protein 8	SL	Telo	N	N	N	3.3	11.8	21.8	104.7	19.3
PgB02X	2704816	2715880	PgB02X_g168_t01	+	2290	10	protein lin-14			N	Y	Y	3.1	31.5	15.9	25.8	5.4
PgB02X	2724933	2737801	PgB02X_g169_t01	+	1978	16	Protein FAM116B			N	N	N	4.7	36.5	13.3	8.2	5.4
PgB02X	2724933	2737801	PgB02X_g169_t02	+	2106	16	Protein FAM116B			N	Y	Y	4.5	35.3	14.8	8.5	5.2
PgB02X	2739768	2743097	PgB02X_g170_t01	+	1146	3	ARL14 effector protein-like	SL		N	Y	Y	1.1	9.9	8.7	1.7	0.7
PgB02X	2744539	2747636	PgB02X_g171_t01	+	948	4	Uncharacterized protein ZC84.1			N	Y	Y	0.1	2	0	0	0.5
PgB02X	2748984	2773645	PgB02X_g172_t01	-	893	5	hypothetical protein			N	Y	Y	0.1	0.4	1.1	0	2.2
PgB02X	2766031	2769388	PgB02X_g173_t01	+	785	5	rna-binding protein 42			N	Y	Y	2	4.8	7.9	2.5	1.6
PgB02X	2776230	2798620	PgB02X_g174_t01	-	3814	22	and ph domain-containing protein 6			N	Y	Y	7.5	60.5	17.4	19.2	6.3
PgB02X	2785046	2785673	PgB02X_g175_t01	+	334	2	FYVE, RhoGEF and PH domain-containing protein 6			N	Y	Y	4.1	39	1.3	4.4	3.7
PgB02X	2808079	2814080	PgB02X_g176_t01	-	1072	8	tbc1 domain family member 22b			N	N	N	3.3	20.4	6.3	3.2	2.5
PgB02X	2808079	2821222	PgB02X_g176_t02	-	1979	15	tbc1 domain family member 22b	SL		N	Y	Y	4.2	28.2	13.6	6.5	3.7
PgB02X	2825488	2830852	PgB02X_g177_t01	+	1238	7	rna-binding protein 42			N	Y	Y	2.8	7	12.8	6.2	3.1
PgB02X	2833523	2835753	PgB02X_g178_t01	-	340	2	dna damage-regulated autophagy modulator protein 2			N	N	N	0.3	0.5	5.7	13	6
PgB02X	2833523	2845163	PgB02X_g178_t02	-	2635	9	DNA damage-regulated autophagy modulator protein 2	SL		N	Y	N	2.5	0.5	4.6	57.8	10.7
PgB02X	2833523	2847693	PgB02X_g178_t03	-	6135	8	dna damage-regulated autophagy modulator protein 2	SL		N	N	Y	1.1	0.2	2	26.1	4.7
PgB02X	2857088	2865893	PgB02X_g179_t01	+	897	8	hypothetical protein			N	Y	Y	0	0	0	0	0
PgB02X	2877774	2887949	PgB02X_g180_t01	-	2425	7	V-type proton ATPase catalytic subunit A		Telo	N	Y	N	4.1	8.1	12.3	53	12.8
PgB02X	2877774	2888174	PgB02X_g180_t02	-	3301	6	V-type proton ATPase catalytic subunit A		Telo	N	N	Y	5.1	9	13.9	59	13.9
PgB02X	2878399	2887919	PgB02X_g181_t01	+	6487	7	V-type proton ATPase catalytic subunit A		Telo	N	Y	Y	0.8	1	2.9	8.1	4.2
PgB02X	2888399	2897322	PgB02X_g182_t01	-	1467	10	Protein KIAA0100	SL		N	Y	Y	10.8	16.9	12.1	8.7	3
PgB02X	2901456	2901839	PgB02X_g183_t01	-	384	1	hypothetical protein			N	Y	Y	0.2	0.7	3.5	0	0
PgB02X	2914394	2917629	PgB02X_g184_t01	+	598	3	hypothetical protein			N	Y	Y	1	0	0	0	0
PgB02X	2949897	2961686	PgB02X_g185_t01	+	1546	8	hypothetical protein		Telo	N	Y	Y	4.4	8	0	0	0.1
PgB02X	2949976	2958776	PgB02X_g185_t02	+	1251	6	hypothetical protein		Telo	N	N	N	4.8	8.1	0	0	0.1
PgB02X	2983620	3023310	PgB02X_g186_t01	+	9859	43	Fatty acid synthase	SL		N	N	N	0.9	100.5	5.7	1.3	17.4
PgB02X	2983706	3023310	PgB02X_g186_t02	+	9688	43	Fatty acid synthase	SL		N	Y	N	0.9	102.2	5.8	1.4	17.7
PgB02X	2983859	3023310	PgB02X_g186_t03	+	10082	42	Fatty acid synthase	SL		N	N	Y	0.9	97.8	5.6	1.2	17.2
PgB02X	3026502	3037491	PgB02X_g187_t01	-	2316	16	Sodium-coupled monocarboxylate transporter 1			N	N	Y	32	13.2	3.4	1.3	1.5
PgB02X	3026502	3038150	PgB02X_g187_t02	-	2091	17	sodium-coupled monocarboxylate transporter 1			N	Y	N	34.9	14.6	3.8	1.4	1.7
PgB02X	3026502	3043160	PgB02X_g187_t03	-	2099	18	sodium-coupled monocarboxylate transporter 1			N	N	N	34.1	14.6	3.8	1.4	1.7
PgB02X	3043665	3073201	PgB02X_g188_t01	+	23054	12	Y+L amino acid transporter 2	SL		N	N	Y	1.3	5.7	5	9.7	2.4
PgB02X	3046866	3073201	PgB02X_g188_t02	+	18611	13	Y+L amino acid transporter 2	SL		N	Y	N	1.3	6.1	5.2	8.7	2.5
PgB02X	3043696	3067174	PgB02X_g189_t01	-	23238	2	Y+L amino acid transporter 2	SL		N	Y	Y	0.3	0.7	0.8	3.5	0.4
PgB02X	3079245	3095020	PgB02X_g190_t01	+	3898	14	Large neutral amino acids transporter small subunit 1	SL		N	Y	N	11.2	22.4	2.2	16.2	6.8
PgB02X	3080653	3095020	PgB02X_g190_t02	+	4095	13	Large neutral amino acids transporter small subunit 1	SL		N	N	Y	10.7	21.3	2.1	15.4	6.5
PgB02X	3096312	3125511	PgB02X_g191_t01	-	4468	28	Cation-transporting ATPase	SL		N	Y	N	17.2	26.9	12.3	14	6.3
PgB02X	3097562	3118946	PgB02X_g191_t02	-	6196	25	Cation-transporting ATPase			N	N	N	12.2	18.9	8.1	10.9	4.6
PgB02X	3097562	3128383	PgB02X_g191_t03	-	8064	27	Cation-transporting ATPase	SL		N	N	N	10.1	15.2	6.9	8.4	3.6
PgB02X	3097562	3136853	PgB02X_g191_t04	-	6268	28	Cation-transporting ATPase	SL		N	N	N	12.2	19	8.5	10.7	4.8
PgB02X	3097562	3136853	PgB02X_g191_t05	-	9723	29	Cation-transporting ATPase	SL		N	N	Y	8.2	12.6	5.8	8.4	3.3
PgB02X	3138896	3152627	PgB02X_g192_t01	-	2962	19	Glutaminyl-tRNA synthetase			N	Y	Y	32.7	42	26	22.5	19.5
PgB02X	3167682	3168074	PgB02X_g193_t01	-	393	1	hypothetical protein			N	Y	Y	0	1	0.6	0	0
PgB02X	3182991	3192836	PgB02X_g194_t01	+	1682	10	Fibrillin-2			N	Y	Y	3.3	12.9	3.5	0	0.3
PgB02X	3185355	3189630	PgB02X_g194_t02	+	758	5	Fibrillin-2			N	N	N	3.7	14.4	2	0	0.4
PgB02X	3202304	3205119	PgB02X_g195_t01	+	931	5	Patched domain-containing protein 3			N	Y	Y	0	1	14.2	0	0
PgB02X	3208715	3214691	PgB02X_g196_t01	+	1273	7	Patched domain-containing protein 3			N	Y	Y	0	0.8	5.1	0.2	0.1
PgB02X	3215061	3216846	PgB02X_g197_t01	+	590	2	patched domain-containing protein 3			N	Y	Y	0	1.1	23.7	0	0
PgB02X	3222709	3228401	PgB02X_g198_t01	+	348	2	hypothetical protein			N	Y	Y	0	0	0	0	0
PgB02X	3232447	3237218	PgB02X_g199_t01	-	688	7	hypothetical protein	SL		N	N	N	0.5	6.2	0.1	0.6	0.7
PgB02X	3232447	3239076	PgB02X_g199_t02	-	2463	6	hypothetical protein	SL		N	N	Y	0.5	1.6	0.5	1.4	0.3
PgB02X	3232447	3239076	PgB02X_g199_t03	-	1942	6	hypothetical protein	SL		N	N	N	0.2	2.1	1	1.1	0.4
PgB02X	3232447	3239693	PgB02X_g199_t04	-	1872	7	hypothetical protein	SL		N	N	N	0.2	2.9	1	1.2	0.4
PgB02X	3235263	3237860	PgB02X_g199_t05	-	1028	4	hypothetical protein	SL		N	N	N	0.2	2.5	0.5	1.7	0.3
PgB02X	3235263	3239532	PgB02X_g199_t06	-	758	4	hypothetical protein	SL		N	Y	N	0.3	3.2	0.3	1.9	0.6
PgB02X	3244002	3259508	PgB02X_g200_t01	+	2239	12	Reticulocyte-binding protein 2-like protein a			N	Y	Y	0.1	0.8	5.5	0.2	16.5
PgB02X	3266252	3297068	PgB02X_g201_t01	-	4594	25	kn motif and ankyrin repeat domain-containing protein 1	SL		N	Y	Y	3.3	84.3	55.9	17.1	21.2
PgB02X	3297317	3302430	PgB02X_g202_t01	-	744	5	hypothetical protein			N	Y	Y	0	4.2	1.4	0.9	1.3
PgB02X	3313334	3321616	PgB02X_g203_t01	-	2887	10	sucrase- intestinal	SL	Telo	N	Y	Y	24.8	0.3	49.5	479.5	100.3
PgB02X	3318104	3319352	PgB02X_g203_t02	-	545	2	sucrase- intestinal		Telo	N	N	N	12	1	26.6	263	52.6
PgB02X	3318104	3321616	PgB02X_g203_t03	-	1150	6	sucrase- intestinal		Telo	N	N	N	31.9	0.5	53.7	616.3	116.4
PgB02X	3322211	3330046	PgB02X_g204_t01	-	2790	10	sucrase- intestinal	SL	Telo	N	Y	Y	27.7	0.4	56.4	563.4	97.9
PgB02X	3333290	3343700	PgB02X_g205_t01	+	1455	14	nedd8-activating enzyme e1 catalytic subunit			N	N	N	6.2	24	14.5	10.9	4.5
PgB02X	3333456	3343700	PgB02X_g205_t02	+	1459	14	nedd8-activating enzyme e1 catalytic subunit			N	N	N	6.4	23.9	14.4	10.9	4.4
PgB02X	3334057	3343700	PgB02X_g205_t03	+	1437	14	nedd8-activating enzyme e1 catalytic subunit			N	Y	N	6.2	23.7	13.9	11.1	4.5
PgB02X	3334177	3343700	PgB02X_g205_t04	+	1505	14	nedd8-activating enzyme e1 catalytic subunit			N	N	Y	5.9	22.7	13.3	11.1	4.3
PgB02X	3348174	3350537	PgB02X_g206_t01	+	509	4	hypothetical protein	SL		N	Y	Y	5.3	4.6	3.3	1.5	0.1
PgB02X	3350682	3355691	PgB02X_g207_t01	-	1302	9	Ribosomal RNA methyltransferase			N	N	N	3.6	9	8.4	2.1	3.2
PgB02X	3350682	3357905	PgB02X_g207_t02	-	1977	12	Ribosomal RNA methyltransferase			N	Y	Y	3.5	9.7	8.1	1.7	3.6
PgB02X	3362949	3374390	PgB02X_g208_t01	-	2167	18	Ribosomal RNA methyltransferase	SL		N	Y	Y	5	17.3	12.4	2	1.9
PgB02X	3378685	3380718	PgB02X_g209_t01	-	562	2	Protein transport protein Sec61 subunit beta			N	Y	Y	24.9	42.6	12.2	17.2	12.1
PgB02X	3391162	3403323	PgB02X_g210_t01	+	2033	11	histone deacetylase 10	SL		N	N	Y	10.8	17.6	7.8	4.1	2.4
PgB02X	3391170	3403323	PgB02X_g210_t02	+	2033	11	histone deacetylase 10	SL		N	Y	N	10.3	16.8	7.6	4.1	2.3
PgB02X	3391234	3403323	PgB02X_g210_t03	+	1965	11	histone deacetylase 10	SL		N	N	N	11.1	18.2	8.1	4.3	2.5
PgB02X	3402887	3410569	PgB02X_g211_t01	-	2624	11	tubulin alpha-3 chain			N	Y	Y	0.5	85.8	0.2	0.6	0.2
PgB02X	3416574	3418686	PgB02X_g212_t01	+	1841	2	hypothetical protein		Telo	N	Y	Y	0	216.9	0	0.8	0.3
PgB02X	3444672	3453458	PgB02X_g213_t01	+	1137	9	Ligand-gated ion channel 50			N	Y	Y	0	0	0.4	0	0.3
PgB02X	3458255	3462516	PgB02X_g214_t01	-	1491	2	hypothetical protein			N	N	N	0	0	0.7	0	0.2
PgB02X	3458255	3462516	PgB02X_g214_t02	-	2290	3	hypothetical protein			N	N	N	0	0	0.5	0	0.3
PgB02X	3459852	3462392	PgB02X_g214_t03	-	2541	1	hypothetical protein			N	Y	Y	0	0	0.4	0	0.4
PgB02X	3465436	3469367	PgB02X_g215_t01	-	807	5	fmrfamide receptor			N	Y	Y	0	0	1.5	0	0
PgB02X	3477560	3479749	PgB02X_g216_t01	-	574	4	Esterase			N	Y	Y	3.8	1.7	14.3	64.7	28.8
PgB02X	3478570	3501006	PgB02X_g217_t01	+	1294	5	esterase cm06b1			N	Y	N	1.3	1.3	2.9	32.4	17.5
PgB02X	3491958	3501006	PgB02X_g217_t02	+	2136	9	esterase cm06b1			N	N	Y	2.4	1.4	8.2	54	25.8
PgB02X	3491958	3501006	PgB02X_g217_t03	+	1787	9	esterase cm06b1			N	N	N	2.3	1.3	8.8	59.2	26.7
PgB02X	3491958	3501006	PgB02X_g217_t04	+	1898	9	esterase cm06b1			N	N	N	2.6	1.7	9.2	62.4	29.1
PgB02X	3491958	3501006	PgB02X_g217_t05	+	1898	9	esterase cm06b1			N	N	N	2.3	1.6	8	53.5	25.8
PgB02X	3480814	3484549	PgB02X_g218_t01	-	1246	4	esterase cm06b1			N	N	Y	1.3	0.3	6.5	36.3	13.9
PgB02X	3480814	3486485	PgB02X_g218_t02	-	705	5	esterase cm06b1			N	Y	N	3	0.6	13.8	73.7	29.5
PgB02X	3485385	3486062	PgB02X_g219_t01	.	678	1	hypothetical protein			N	Y	Y	0.6	0	1.6	0	1.4
PgB02X	3505186	3509827	PgB02X_g220_t01	-	3450	4	Glycogen synthase kinase-3			Y	N	N	24	1.8	9.4	0.7	0.2
PgB02X	3505186	3510257	PgB02X_g220_t02	-	3931	4	Glycogen synthase kinase-3			Y	Y	Y	19	1.6	8.2	0.5	0.2
PgB02X	3508464	3510259	PgB02X_g221_t01	+	1701	2	Glycogen synthase kinase-3			Y	Y	Y	11.9	0.3	1.2	0.2	0
PgB03	7262	28056	PgB03_g001_t01	-	3330	20	poly rna polymerase gld-2-like protein b	SL		N	Y	N	13.2	24.2	7.9	7.9	2.2
PgB03	7262	28202	PgB03_g001_t02	-	3470	20	poly rna polymerase gld-2-like protein b	SL		N	N	Y	12.9	23.5	7.6	7.7	2.2
PgB03	25211	28079	PgB03_g001_t03	-	932	5	Poly(A) RNA polymerase gld-2	SL		N	N	N	12.3	22	5.7	5	1.7
PgB03	32341	36742	PgB03_g002_t01	-	358	2	Receptor expression-enhancing protein 5	SL	Telo	N	N	N	401.2	11.3	1.4	6.2	4.7
PgB03	32341	39705	PgB03_g002_t02	-	1659	4	Receptor expression-enhancing protein 5	SL	Telo	N	N	N	283.3	5.8	4.6	5.1	2.9
PgB03	32341	42942	PgB03_g002_t03	-	790	5	Receptor expression-enhancing protein 6	SL	Telo	N	Y	N	412.6	9.6	6.4	3.8	5.6
PgB03	33744	39696	PgB03_g002_t04	-	800	4	Receptor expression-enhancing protein 5	SL	Telo	N	N	N	261.9	3.4	5.3	4.2	2.1
PgB03	33744	39705	PgB03_g002_t05	-	809	3	Receptor expression-enhancing protein 5	SL	Telo	N	N	N	258.9	3.4	5.3	4.1	2.1
PgB03	33744	39705	PgB03_g002_t06	-	809	4	Receptor expression-enhancing protein 5	SL	Telo	N	N	N	259	3.4	5.3	4.1	2.1
PgB03	33744	39705	PgB03_g002_t07	-	809	4	Receptor expression-enhancing protein 5	SL	Telo	N	N	N	258.9	3.4	5.3	4.1	2.1
PgB03	33744	42942	PgB03_g002_t08	-	2686	8	Receptor expression-enhancing protein 6	SL	Telo	N	N	Y	127	1.1	3.3	1.8	1.6
PgB03	40412	54505	PgB03_g002_t09	-	2226	11	Riboflavin transporter 2	SL		N	N	N	65.3	23.9	15.5	6.6	4.6
PgB03	46831	54505	PgB03_g002_t10	-	1497	8	Riboflavin transporter 2	SL		N	N	N	5.7	38	21.6	10.1	5.3
PgB03	46831	54505	PgB03_g002_t11	-	1493	8	Riboflavin transporter 2	SL		N	N	N	5.7	38	21.6	10.2	5.3
PgB03	56423	62371	PgB03_g003_t01	+	1357	8	Casein kinase I		Telo	N	Y	Y	66.7	0	0.8	1.1	0.6
PgB03	56473	62371	PgB03_g003_t02	+	1166	7	Casein kinase I		Telo	N	N	N	66.6	0	0.9	0.6	0.7
PgB03	65818	68614	PgB03_g004_t01	-	2681	2	Carbonic anhydrase 5		Telo	N	Y	Y	1.7	0	5.5	61.3	10.5
PgB03	65818	68614	PgB03_g005_t01	+	510	3	Carbonic anhydrase 5		Telo	N	Y	N	26.1	0.1	87.7	729.6	145.9
PgB03	65818	68614	PgB03_g005_t02	+	510	4	Carbonic anhydrase 5		Telo	N	N	N	33.1	0.2	107.6	994.4	192.5
PgB03	66834	68614	PgB03_g005_t03	+	680	3	Carbonic anhydrase 5			N	N	N	16.8	0.2	53.2	566.1	111.9
PgB03	67537	68614	PgB03_g005_t04	+	1078	1	Carbonic anhydrase 5			N	N	Y	3.3	0	8.3	85.7	18.1
PgB03	73317	93345	PgB03_g006_t01	+	2423	8	EF-hand domain-containing protein D2	SL	Telo	N	Y	N	4.6	40.7	46.5	3.3	3
PgB03	78315	93345	PgB03_g006_t02	+	1646	6	EF-hand domain-containing protein D2	SL	Telo	N	N	N	5.7	44.4	61.3	3.7	2.8
PgB03	83826	93345	PgB03_g006_t03	+	2806	6	EF-hand domain-containing protein D2	SL	Telo	N	N	Y	3.7	28.1	41.4	2.5	1.6
PgB03	98018	151198	PgB03_g007_t01	-	2254	13	3',5'-cyclic phosphodiesterase pde-4	SL		N	N	N	0.4	28.7	2.1	0.6	1.4
PgB03	98018	193319	PgB03_g007_t02	-	2367	14	3',5'-cyclic phosphodiesterase pde-4	SL		N	Y	N	0.4	33.2	2	0.5	1.3
PgB03	98018	193319	PgB03_g007_t03	-	2373	14	3',5'-cyclic phosphodiesterase pde-4	SL		N	N	N	0.3	33.1	2	0.5	1.3
PgB03	101180	193319	PgB03_g007_t04	-	2490	13	3',5'-cyclic phosphodiesterase pde-4	SL		N	N	Y	0.3	30.9	1.1	0.5	1.3
PgB03	227104	227963	PgB03_g008_t01	+	340	2	cre-mlt-10 protein			N	Y	Y	1.1	0	5.2	0	0.6
PgB03	228909	232308	PgB03_g009_t01	+	1011	3	cre-mlt-10 protein			N	Y	Y	2	0	2.5	0	0
PgB03	243578	259856	PgB03_g010_t01	+	1484	9	beta-lactamase domain-containing protein 2	SL	Telo	N	N	N	0	0.6	0	0	16.7
PgB03	243578	259856	PgB03_g010_t02	+	1835	9	beta-lactamase domain-containing protein 2	SL	Telo	N	Y	Y	0	0.8	0	0	16.3
PgB03	255237	258066	PgB03_g011_t01	.	2830	1	Retrovirus-related Pol polyprotein from type-1 retrotransposable element R2			N	Y	Y	0.2	0.5	0.9	1.6	5.5
PgB03	258123	258448	PgB03_g012_t01	.	326	1	Retrovirus-related Pol polyprotein from type-1 retrotransposable element R2			N	Y	Y	0	0	0	1.5	3.3
PgB03	260338	263942	PgB03_g013_t01	+	943	5	hypothetical protein			N	Y	N	10.5	0	0	0	0.3
PgB03	261182	263942	PgB03_g013_t02	+	1038	3	hypothetical protein			N	N	Y	6.2	0	0.6	0	0.7
PgB03	263223	263942	PgB03_g013_t03	+	720	1	hypothetical protein			N	N	N	3.8	0	0	0	0.4
PgB03	265904	267175	PgB03_g014_t01	-	716	2	tryptophan 5-hydroxylase 1			N	Y	Y	0.4	0.4	0	0	3.2
PgB03	280902	289228	PgB03_g015_t01	-	2013	8	cre-mlt-10 protein			N	Y	Y	0	0	0	0	0
PgB03	303178	311190	PgB03_g016_t01	+	1943	11	Peptidyl-prolyl cis-trans isomerase 4	SL		N	N	Y	6.6	27.8	9.2	2.9	2.4
PgB03	303178	311190	PgB03_g016_t02	+	1694	12	Peptidyl-prolyl cis-trans isomerase 4	SL		N	Y	N	7.6	31.9	10.5	3.4	2.8
PgB03	311750	321063	PgB03_g017_t01	-	1760	13	Glutamate receptor 1	SL		N	Y	Y	3.3	0.3	1.7	12.6	5
PgB03	327800	345752	PgB03_g018_t01	-	2191	18	Histone-lysine N-methyltransferase EZH2	SL		N	Y	Y	8.2	19.3	14.6	5	1.4
PgB03	327800	345752	PgB03_g018_t02	-	2191	18	Histone-lysine N-methyltransferase EZH2	SL		N	N	N	8.2	19.3	14.6	5	1.4
PgB03	352787	362081	PgB03_g019_t01	-	1798	10	cre-eff-1 protein			N	Y	Y	0.8	0	0.4	0	0.4
PgB03	394921	401419	PgB03_g020_t01	+	892	5	hypothetical protein			N	Y	Y	0	0.1	3.3	0	3.7
PgB03	401929	405382	PgB03_g021_t01	-	785	4	hypothetical protein	SL		N	N	Y	0.1	63.8	0	0.1	0.3
PgB03	402967	404151	PgB03_g021_t02	-	705	2	hypothetical protein			N	Y	N	0.1	34.4	2.9	0	0
PgB03	403703	407862	PgB03_g022_t01	+	597	4	hypothetical protein	SL		N	Y	Y	0.8	19.7	1.3	0.1	1.6
PgB03	410564	416423	PgB03_g023_t01	-	943	7	Histone chaperone asf-1			N	N	N	8.2	15.6	21.7	5.4	1.5
PgB03	410564	436134	PgB03_g023_t02	-	901	7	Histone chaperone asf-1		Telo	N	N	N	8.3	15.9	22.7	5.6	1.6
PgB03	410811	436120	PgB03_g023_t03	-	834	7	Histone chaperone asf-1		Telo	N	N	N	9	17.1	23.2	6.1	1.7
PgB03	410811	436134	PgB03_g023_t04	-	848	6	Histone chaperone asf-1		Telo	N	N	N	8.8	16.9	22.9	6	1.7
PgB03	415110	416521	PgB03_g023_t05	-	774	3	Histone chaperone asf-1			N	N	N	3.5	8.2	9.4	1.7	0.5
PgB03	421373	428490	PgB03_g023_t06	-	969	6	putative histone chaperone asf-1		Telo	N	N	N	3.7	6.5	3.2	1.6	1.6
PgB03	424142	430996	PgB03_g023_t07	-	174	2	hypothetical protein		Telo	N	N	N	1.8	4.3	6.8	0	0.8
PgB03	427093	436134	PgB03_g023_t08	-	1008	6	Histone chaperone asf-1			N	Y	Y	6.9	15.9	19.4	5.2	1.8
PgB03	430432	436134	PgB03_g023_t09	-	314	4	Histone chaperone asf-1			N	N	N	7	21.7	23	3.8	1.6
PgB03	438667	441116	PgB03_g024_t01	-	923	3	nadh-ubiquinone oxidoreductase b12 subunit	SL		N	Y	Y	74.2	168	65.6	80.6	73.2
PgB03	442668	444810	PgB03_g025_t01	+	927	3	Nogo-B receptor	SL		N	Y	Y	1.1	5.6	7.5	8.1	0.7
PgB03	452075	467170	PgB03_g026_t01	+	2208	15	Glutamate--cysteine ligase	SL		N	Y	N	16.7	36.4	28.3	25.9	9.7
PgB03	452075	467170	PgB03_g026_t02	+	2208	15	Glutamate--cysteine ligase	SL		N	N	N	16.7	36.4	28.3	25.9	9.7
PgB03	453749	467170	PgB03_g026_t03	+	3211	14	Glutamate--cysteine ligase	SL		N	N	Y	13.2	25	19.5	18	6.6
PgB03	453749	467170	PgB03_g026_t04	+	3211	14	Glutamate--cysteine ligase	SL		N	N	N	13.2	25	19.5	18	6.6
PgB03	453845	467170	PgB03_g026_t05	+	2222	15	Glutamate--cysteine ligase	SL		N	N	N	16.6	36.1	28.1	25.7	9.6
PgB03	453850	467170	PgB03_g026_t06	+	2217	15	Glutamate--cysteine ligase	SL		N	N	N	16.6	36.2	28.2	25.8	9.6
PgB03	454132	463378	PgB03_g026_t07	+	2294	10	Glutamate--cysteine ligase	SL		N	N	N	15.3	31.8	21.9	20.9	8
PgB03	454132	463378	PgB03_g026_t08	+	2294	10	Glutamate--cysteine ligase	SL		N	N	N	15.3	31.8	21.9	20.9	8
PgB03	475261	500067	PgB03_g027_t01	-	1420	3	l-fucose kinase		Telo	N	Y	Y	0.6	0	0	0.9	3.9
PgB03	483114	522927	PgB03_g028_t01	+	3261	22	l-fucose kinase		Telo	N	N	N	6.1	4.1	4.8	12	4
PgB03	483120	521229	PgB03_g028_t02	+	2551	21	l-fucose kinase		Telo	N	N	N	7.3	4.8	5.6	14.8	4.8
PgB03	496489	522927	PgB03_g028_t03	+	3314	22	l-fucose kinase		Telo	N	N	Y	6.2	4	4.7	11.8	3.9
PgB03	496551	520779	PgB03_g028_t04	+	2614	21	l-fucose kinase		Telo	N	Y	N	7.4	4.7	5.4	14.4	4.7
PgB03	524981	528957	PgB03_g029_t01	+	1551	5	L-fucose kinase	SL		N	Y	Y	2.6	9.1	6.8	4.8	2.5
PgB03	534188	537342	PgB03_g030_t01	+	894	4	Ras-related protein Rab-7a			N	Y	Y	13.7	24.1	18.8	12.9	23.5
PgB03	538262	538844	PgB03_g031_t01	.	583	1	hypothetical protein			N	Y	Y	1.6	8.3	3.9	3	4.1
PgB03	544596	550443	PgB03_g032_t01	-	1687	8	D-2-hydroxyglutarate dehydrogenase	SL		N	Y	Y	2.5	8.7	4.1	3.3	1.7
PgB03	554829	560461	PgB03_g033_t01	-	1119	7	General transcription factor IIE subunit 2			N	Y	Y	9.1	16.5	15.6	8	2.4
PgB03	583137	584008	PgB03_g034_t01	+	872	1	GSK3-beta interaction protein	SL		N	Y	Y	1	10.4	3	2.2	0.1
PgB03	583137	584694	PgB03_g034_t02	+	465	2	GSK3-beta interaction protein	SL		N	N	N	2.1	46.4	17.5	2.7	0.8
PgB03	585228	598256	PgB03_g035_t01	-	4711	11	hypothetical protein	SL	Telo	N	Y	Y	5.2	24	21	0.5	0.2
PgB03	587191	598256	PgB03_g035_t02	-	2855	10	GSK3-beta interaction protein	SL	Telo	N	N	N	7.4	27.7	27.1	0.6	0.2
PgB03	589734	592767	PgB03_g035_t03	-	670	3	hypothetical protein			N	N	N	5.7	23.7	24.4	0.7	0.6
PgB03	594045	598256	PgB03_g035_t04	-	1972	3	hypothetical protein	SL	Telo	N	N	N	7.3	21.1	19.4	0.2	0.1
PgB03	599661	610187	PgB03_g036_t01	-	1863	11	M-phase inducer phosphatase cdc-25.1	SL		N	Y	Y	3.5	39.2	32.4	0	0.4
PgB03	599661	610187	PgB03_g036_t02	-	1863	11	M-phase inducer phosphatase cdc-25.1	SL		N	N	N	3.5	39.2	32.4	0	0.4
PgB03	615125	631052	PgB03_g037_t01	+	2771	16	splicing factor 3a subunit 3	SL		N	Y	Y	7	28.2	22.9	4.3	2
PgB03	615125	631052	PgB03_g037_t02	+	2762	16	splicing factor 3a subunit 3	SL		N	N	N	7.1	28.3	23	4.5	2
PgB03	615125	631052	PgB03_g037_t03	+	2762	16	splicing factor 3a subunit 3	SL		N	N	N	7.1	28.2	23	4.5	2
PgB03	615165	631052	PgB03_g037_t04	+	2722	16	splicing factor 3a subunit 3	SL		N	N	N	7.2	28.7	23.4	4.5	2
PgB03	615186	631052	PgB03_g037_t05	+	2710	16	splicing factor 3a subunit 3	SL		N	N	N	7.2	28.6	23.4	4.4	2
PgB03	615210	623580	PgB03_g037_t06	+	1682	10	hypothetical protein	SL		N	N	N	7.7	32.2	23.4	4.3	2.6
PgB03	630833	642306	PgB03_g038_t01	-	1573	11	Splicing factor 3A subunit 3	SL	Telo	N	Y	Y	23.7	58.1	46	13.3	6.9
PgB03	631892	633366	PgB03_g039_t01	-	457	2	hypothetical protein			N	Y	Y	1.1	13.4	7.9	3	1.3
PgB03	659836	700792	PgB03_g040_t01	+	2295	14	Peroxidase mlt-7	SL		N	N	N	0.3	4.2	3.1	1.3	2.9
PgB03	666092	700792	PgB03_g040_t02	+	2604	13	Peroxidase mlt-7	SL		N	N	Y	0.3	3.7	2.4	1.2	2.6
PgB03	679348	700792	PgB03_g040_t03	+	2468	12	Peroxidase mlt-7	SL		N	Y	N	0.3	3.9	2.5	1.2	2.5
PgB03	705235	718303	PgB03_g041_t01	-	2249	13	Peroxidase mlt-7			N	Y	Y	0	2.3	0.7	0	0.2
PgB03	730983	738483	PgB03_g042_t01	-	1656	4	hypothetical protein	SL		N	Y	Y	4.7	19.7	54.7	7.8	3.1
PgB03	731320	738483	PgB03_g042_t02	-	1466	4	hypothetical protein	SL		N	N	N	4.7	21.4	56.1	8.8	3.3
PgB03	745252	755480	PgB03_g043_t01	-	1366	8	OTU domain-containing protein 3			N	Y	Y	14.9	24.1	17.6	19.9	8.3
PgB03	761073	761683	PgB03_g044_t01	+	215	2	Hydroxypyruvate isomerase	SL		N	N	N	1.2	21.5	3.9	5.5	3.4
PgB03	761073	769740	PgB03_g044_t02	+	760	8	Hydroxypyruvate isomerase	SL		N	Y	N	20.2	38.7	6.7	7.7	7.2
PgB03	761073	770294	PgB03_g044_t03	+	1142	8	Hydroxypyruvate isomerase	SL		N	N	Y	20.4	33.3	5.1	6.4	7.4
PgB03	764111	770294	PgB03_g044_t04	+	883	6	Hydroxypyruvate isomerase	SL		N	N	N	25.4	24	3.7	3.9	6.9
PgB03	769651	770294	PgB03_g045_t01	-	472	2	Hydroxypyruvate isomerase			N	Y	Y	17	18.2	1.4	3	6.4
PgB03	817559	830350	PgB03_g046_t01	+	5586	9	YTH domain-containing protein 1	SL		N	Y	Y	4.7	3.5	1.9	1.8	0.4
PgB03	817559	835526	PgB03_g046_t02	+	5513	11	YTH domain-containing protein 1	SL		N	N	N	4.7	3.3	1.9	1.7	0.4
PgB03	818226	820511	PgB03_g046_t03	+	875	2	YTH domain-containing protein 1	SL		N	N	N	1.7	2.7	2.5	0.6	0.5
PgB03	819787	820511	PgB03_g046_t04	+	725	1	YTH domain-containing protein 1	SL		N	N	N	2.4	4	4.3	0.7	0.6
PgB03	824066	835526	PgB03_g046_t05	+	1598	9	YTH domain-containing protein 1			N	N	N	6.9	5.2	2.7	3.2	0.7
PgB03	839282	845516	PgB03_g047_t01	-	754	4	GILT-like protein			N	N	N	6.1	15.5	13.2	4.4	0
PgB03	839282	850195	PgB03_g047_t02	-	1001	5	GILT-like protein	SL		N	Y	Y	6.5	19.6	10.5	5.6	0.9
PgB03	857507	861717	PgB03_g048_t01	-	1098	6	hypothetical protein	SL		N	Y	Y	0	3.8	32.3	0.2	0.1
PgB03	918614	927884	PgB03_g049_t01	-	2107	11	Zinc finger and BTB domain-containing protein 16-A	SL		N	N	Y	4.4	13.4	11.6	6	1.1
PgB03	918614	927884	PgB03_g049_t02	-	2107	11	Zinc finger and BTB domain-containing protein 16-A	SL		N	Y	N	4.4	13.4	11.6	6	1.1
PgB03	944823	949027	PgB03_g050_t01	+	1646	6	actin-2		Telo	N	Y	Y	82	70.2	41.2	49.2	3806.7
PgB03	944823	959514	PgB03_g050_t02	+	1489	6	actin-2		Telo	N	N	N	33.4	52.1	47	69.5	4107.4
PgB03	944823	959514	PgB03_g050_t03	+	1489	7	actin-2		Telo	N	N	N	31.5	71.6	60.5	110	5848.6
PgB03	955556	959514	PgB03_g050_t04	+	1391	6	actin-2		Telo	N	N	N	69.3	65.8	63.8	91.6	5422
PgB03	957437	959514	PgB03_g050_t05	+	783	4	Actin-2		Telo	N	N	N	92.7	67.8	58.4	123.6	5462.9
PgB03	945721	956501	PgB03_g051_t01	-	524	2	actin-2		Telo	N	Y	Y	36.5	41.4	37.9	42.6	2617.7
PgB03	945721	956501	PgB03_g051_t02	-	524	2	actin-2		Telo	N	N	N	28.2	115.5	79.1	65.8	4767.8
PgB03	948581	959514	PgB03_g052_t01	-	290	2	Actin-2		Telo	N	Y	Y	0.8	1.1	3.8	10.2	923.7
PgB03	963267	967279	PgB03_g053_t01	-	1451	6	actin-2			N	Y	N	60.5	44.3	27.9	46.5	3560.7
PgB03	963267	978012	PgB03_g053_t02	-	1464	7	actin-2		Telo	N	N	N	359.2	169.8	135.9	270.3	14560.6
PgB03	965748	967277	PgB03_g053_t03	-	696	3	Actin-2			N	N	N	34.1	63.9	47.6	58.1	4077.5
PgB03	972699	974511	PgB03_g053_t04	-	1293	2	Actin-2		Telo	N	N	N	114.4	8	23.7	12.5	333.3
PgB03	972699	975927	PgB03_g053_t05	-	1614	4	Actin-2		Telo	N	N	N	270.8	46	47.5	78.7	3043.1
PgB03	972699	977642	PgB03_g053_t06	-	2159	6	actin-2		Telo	N	N	Y	281.6	36.1	41.1	69.7	2719
PgB03	972699	978012	PgB03_g053_t07	-	1887	7	actin-2		Telo	N	N	N	299.1	26.1	41.4	50.1	1726.3
PgB03	975108	978012	PgB03_g053_t08	-	1093	4	Actin-2		Telo	N	N	N	298	42.5	45	86.5	2946.6
PgB03	976009	978012	PgB03_g053_t09	-	926	3	Actin-2		Telo	N	N	N	70.3	5.8	10.1	11.7	479.4
PgB03	965194	975690	PgB03_g054_t01	+	275	2	Actin-2		Telo	N	N	N	20.3	49.2	14.6	77.5	3986.7
PgB03	965194	975690	PgB03_g054_t02	+	275	2	Actin-2		Telo	N	Y	N	114.7	34.3	15.3	30.6	2661.4
PgB03	975108	977183	PgB03_g054_t03	+	2076	1	actin-2		Telo	N	N	Y	82.8	9.3	10.4	16	607
PgB03	972699	973717	PgB03_g055_t01	.	1019	1	Actin-2		Telo	N	Y	Y	72.2	3.8	13.3	7.7	128.4
PgB03	984006	987690	PgB03_g056_t01	+	546	5	Aldose reductase B			N	Y	Y	8.6	44.5	20.3	13.2	9.4
PgB03	994437	1002119	PgB03_g057_t01	+	1499	7	hypothetical protein	SL		N	Y	Y	1.1	1.8	0	0.5	0.5
PgB03	1005180	1010687	PgB03_g058_t01	-	1275	4	hypothetical protein			N	Y	N	0.2	0.4	0	0	1
PgB03	1009739	1011365	PgB03_g058_t02	-	1336	2	hypothetical protein			N	N	Y	0.1	0.4	0	0	1.3
PgB03	1023687	1027365	PgB03_g059_t01	-	553	3	hypothetical protein			N	Y	Y	0	0	4.1	0	2.3
PgB03	1027632	1050401	PgB03_g060_t01	+	1920	9	hypothetical protein			N	Y	N	4.1	19.5	34.8	0.2	1.7
PgB03	1027632	1051190	PgB03_g060_t02	+	2441	10	hypothetical protein			N	N	Y	3.5	16.7	32	0.1	1.4
PgB03	1027632	1051190	PgB03_g060_t03	+	2378	10	hypothetical protein			N	N	N	3.6	17.1	33.2	0.1	1.4
PgB03	1027632	1051190	PgB03_g060_t04	+	2438	10	hypothetical protein			N	N	N	3.5	16.8	32	0.1	1.4
PgB03	1027640	1051190	PgB03_g060_t05	+	2367	10	hypothetical protein			N	N	N	3.6	17.2	33.4	0.1	1.4
PgB03	1027640	1051190	PgB03_g060_t06	+	2355	10	hypothetical protein			N	N	N	3.6	16.4	30.8	0.1	1.5
PgB03	1077468	1082471	PgB03_g061_t01	+	729	5	hypothetical protein			N	Y	Y	0	0	0	0	0
PgB03	1091247	1097537	PgB03_g062_t01	-	3031	5	nc domain containing protein	SL	Telo	N	N	N	6.5	71.7	29.8	143.7	36.4
PgB03	1091247	1097537	PgB03_g062_t02	-	4647	4	nc domain containing protein	SL	Telo	N	Y	Y	5.5	52.8	22.5	111.6	27.7
PgB03	1091247	1120088	PgB03_g062_t03	-	1825	6	nc domain containing protein	SL	Telo	N	N	N	10.4	119	48.8	232.3	59.5
PgB03	1091247	1120088	PgB03_g062_t04	-	1828	5	nc domain containing protein	SL	Telo	N	N	N	9.4	111.1	49.2	193	51.6
PgB03	1116013	1120088	PgB03_g062_t05	-	886	5	nc domain containing protein	SL		N	N	N	7.3	72.1	35.6	136.4	32
PgB03	1121872	1122282	PgB03_g063_t01	.	411	1	hypothetical protein			N	Y	Y	1.7	4.8	8.6	0.7	1.2
PgB03	1123331	1138613	PgB03_g064_t01	-	2184	15	Integrator complex subunit 11			N	Y	N	7.5	12.5	7.6	5.5	4.7
PgB03	1123331	1138613	PgB03_g064_t02	-	2184	16	Integrator complex subunit 11			N	N	N	7.5	12.5	7.6	5.5	4.7
PgB03	1124907	1138513	PgB03_g064_t03	-	2088	12	Integrator complex subunit 11			N	N	N	7.1	10.8	6.4	5.6	4.2
PgB03	1124907	1138601	PgB03_g064_t04	-	2226	12	Integrator complex subunit 11			N	N	Y	6.9	11	6.1	5.3	4.1
PgB03	1141565	1145666	PgB03_g065_t01	+	2142	3	Histone H4			N	Y	N	6.3	14.1	14.4	8.7	4
PgB03	1141565	1145666	PgB03_g065_t02	+	2352	2	Histone H4			N	N	Y	5.7	13.1	13.1	7.9	3.6
PgB03	1150084	1154101	PgB03_g066_t01	-	1854	5	gram domain-containing protein 4			N	Y	Y	0.4	21	10	18.5	4.3
PgB03	1150084	1156288	PgB03_g066_t02	-	1560	6	gram domain-containing protein 4			N	N	N	1	25.3	11.6	18	6
PgB03	1150084	1156438	PgB03_g066_t03	-	1789	7	gram domain-containing protein 4			N	N	N	0.8	24.9	11.6	20.8	5.8
PgB03	1156502	1168775	PgB03_g067_t01	-	2069	6	gram domain-containing protein 4			N	Y	Y	0.1	7.7	2.1	8.2	1.3
PgB03	1173170	1173661	PgB03_g068_t01	.	492	1	hypothetical protein			N	Y	Y	0.1	1.7	0	0	0
PgB03	1181930	1186006	PgB03_g069_t01	-	1206	2	hypothetical protein			N	N	N	73.8	0	0.1	1.7	0.4
PgB03	1181930	1191518	PgB03_g069_t02	-	1224	6	hypothetical protein			N	N	Y	115.8	0	0.1	3.4	1
PgB03	1181930	1193111	PgB03_g069_t03	-	865	6	hypothetical protein			N	N	N	129.6	0	0.1	3.6	1
PgB03	1181930	1193194	PgB03_g069_t04	-	987	6	hypothetical protein			N	N	N	125.5	0	0.1	4.3	1.2
PgB03	1181930	1193194	PgB03_g069_t05	-	1119	7	hypothetical protein			N	Y	N	125.4	0	0.1	3.8	1.1
PgB03	1187669	1191518	PgB03_g069_t06	-	1122	3	hypothetical protein			N	N	N	51.8	0	0.1	2.3	0.5
PgB03	1201495	1225701	PgB03_g070_t01	+	3040	9	Organic cation transporter protein	SL		N	N	Y	9	8.5	4.8	8.3	4.1
PgB03	1201495	1225701	PgB03_g070_t02	+	3040	9	Organic cation transporter protein	SL		N	N	N	9	8.5	4.8	8.3	4.1
PgB03	1201495	1225701	PgB03_g070_t03	+	3040	10	Organic cation transporter protein	SL		N	N	N	9	8.5	4.8	8.3	4.1
PgB03	1201495	1225701	PgB03_g070_t04	+	1855	10	Organic cation transporter protein	SL		N	N	N	13	14.3	7.9	13.3	6.7
PgB03	1201539	1225701	PgB03_g070_t05	+	1811	10	Organic cation transporter protein	SL		N	N	N	13.4	14.6	8.1	13.6	6.9
PgB03	1201539	1225701	PgB03_g070_t06	+	1811	10	Organic cation transporter protein	SL		N	N	N	13.4	14.6	8.1	13.6	6.9
PgB03	1212320	1225701	PgB03_g070_t07	+	2245	9	Organic cation transporter protein	SL		N	Y	N	10.8	11.8	6.5	11	5.5
PgB03	1212320	1225701	PgB03_g070_t08	+	2245	9	Organic cation transporter protein	SL		N	N	N	10.8	11.8	6.5	11	5.5
PgB03	1212320	1225701	PgB03_g070_t09	+	2245	9	Organic cation transporter protein	SL		N	N	N	10.8	11.8	6.5	11	5.5
PgB03	1217145	1225701	PgB03_g070_t10	+	2929	8	Organic cation transporter protein	SL		N	N	N	9.3	8.8	4.5	8.5	4.3
PgB03	1217145	1225701	PgB03_g070_t11	+	1744	9	Organic cation transporter protein	SL		N	N	N	13.8	15.1	7.6	14	7.1
PgB03	1229558	1230149	PgB03_g071_t01	.	592	1	hypothetical protein			N	Y	Y	0	0.9	0	0	0
PgB03	1239798	1246281	PgB03_g072_t01	+	1612	6	MOSC domain-containing protein 1	SL		N	Y	Y	3	27.1	24.2	30.6	67.7
PgB03	1239798	1247103	PgB03_g072_t02	+	1537	7	MOSC domain-containing protein 1	SL		N	N	N	2.9	24.2	18.6	29.1	66.1
PgB03	1239877	1246642	PgB03_g072_t03	+	1400	7	MOSC domain-containing protein 1	SL		N	N	N	3.3	26.3	20.4	31.9	70.3
PgB03	1244311	1246642	PgB03_g072_t04	+	826	3	MOSC domain-containing protein 1			N	N	N	1.1	8.1	5.4	5.5	26.2
PgB03	1244311	1247103	PgB03_g072_t05	+	884	3	MOSC domain-containing protein 1			N	N	N	0.9	7.9	5	5.2	27.7
PgB03	1265976	1279683	PgB03_g073_t01	-	5060	11	metal transporter cnnm4			N	N	N	0.8	0	1.2	10.4	1.7
PgB03	1265976	1282619	PgB03_g073_t02	-	3515	13	metal transporter cnnm4			N	N	N	1	0	1.7	10.7	2.3
PgB03	1265976	1282793	PgB03_g073_t03	-	4478	15	metal transporter cnnm4			N	N	N	0.7	0	1.8	12.4	2.2
PgB03	1265976	1282828	PgB03_g073_t04	-	7579	13	metal transporter cnnm4			N	N	Y	0.8	0	1.2	8.3	1.4
PgB03	1265976	1282828	PgB03_g073_t05	-	7198	13	metal transporter cnnm4			N	N	N	0.8	0	1.3	8.6	1.4
PgB03	1265976	1282828	PgB03_g073_t06	-	3040	14	metal transporter cnnm4			N	N	N	1	0	2.6	12.2	2.7
PgB03	1265976	1282828	PgB03_g073_t07	-	5197	14	metal transporter cnnm4			N	N	N	0.7	0	1.6	11.2	1.9
PgB03	1265976	1284442	PgB03_g073_t08	-	4091	16	metal transporter cnnm4			N	N	N	0.7	0	1.7	8.6	2.3
PgB03	1267613	1282793	PgB03_g073_t09	-	3037	14	metal transporter cnnm4			N	N	N	1	0	2.2	11.5	2.8
PgB03	1280655	1282793	PgB03_g073_t10	-	1000	3	metal transporter cnnm4			N	Y	N	0.2	0	2.3	6.6	1.3
PgB03	1315562	1320782	PgB03_g074_t01	+	1447	8	Ras-like protein			N	Y	Y	0.4	19.8	31.1	0.3	0.1
PgB03	1339237	1342335	PgB03_g075_t01	-	516	2	hypothetical protein			N	Y	Y	0.3	0	2.8	0	0
PgB03	1354566	1366420	PgB03_g076_t01	-	5881	5	hypothetical protein			N	N	N	5.5	0	0	0	0.1
PgB03	1354566	1366443	PgB03_g076_t02	-	10679	2	hypothetical protein			N	Y	Y	4.4	0	0	0	0
PgB03	1354566	1366443	PgB03_g076_t03	-	6995	4	hypothetical protein			N	N	N	5.6	0	0	0	0
PgB03	1354566	1366443	PgB03_g076_t04	-	6638	4	hypothetical protein			N	N	N	5.7	0	0	0	0
PgB03	1390039	1395339	PgB03_g077_t01	-	1806	6	vesicle transport through interaction with t-snares-like protein 1a	SL		N	Y	Y	2	28.7	15.3	2.1	2.3
PgB03	1401062	1407315	PgB03_g078_t01	-	1043	5	28S ribosomal protein S7			N	Y	Y	14.6	29.4	10.6	10.9	7.6
PgB03	1410854	1420445	PgB03_g079_t01	-	1113	8	citron rho-interacting kinase			N	N	N	17.2	6.9	15.3	9.7	2.3
PgB03	1410854	1433617	PgB03_g079_t02	-	2632	21	citron rho-interacting kinase			N	N	N	19.1	11	18.6	8.4	2.2
PgB03	1410854	1435160	PgB03_g079_t03	-	2954	22	citron rho-interacting kinase			N	N	N	19.7	11	19.4	7.4	2
PgB03	1410854	1438317	PgB03_g079_t04	-	3497	27	citron rho-interacting kinase			N	N	N	19.7	12.8	19	6.6	1.8
PgB03	1410854	1438317	PgB03_g079_t05	-	3414	26	citron rho-interacting kinase			N	N	N	20.2	13.2	19.1	6.7	1.8
PgB03	1410854	1438317	PgB03_g079_t06	-	3414	26	citron rho-interacting kinase			N	N	N	20.2	13.2	19.1	6.7	1.8
PgB03	1410854	1497146	PgB03_g079_t07	-	3691	28	citron rho-interacting kinase	SL	Telo	N	N	N	19.4	14.7	19	6.3	1.7
PgB03	1410854	1503455	PgB03_g079_t08	-	4662	35	citron rho-interacting kinase	SL	Telo	N	Y	Y	16.6	20.5	21.1	5.5	1.5
PgB03	1411762	1491548	PgB03_g079_t09	-	2857	23	citron rho-interacting kinase	SL	Telo	N	N	N	20.3	11.2	20.1	7.6	2
PgB03	1414825	1415474	PgB03_g079_t10	-	101	2	citron rho-interacting kinase			N	N	N	8.2	0	0	14.4	0
PgB03	1414825	1428689	PgB03_g079_t11	-	1758	15	citron rho-interacting kinase			N	N	N	22.5	13.1	18.9	10.8	3.1
PgB03	1416597	1417308	PgB03_g079_t12	-	104	2	citron rho-interacting kinase			N	N	N	4	3.9	25	7.3	1.4
PgB03	1417787	1428689	PgB03_g079_t13	-	1404	12	citron rho-interacting kinase			N	N	N	23.1	14.6	20.2	8.9	3.5
PgB03	1417787	1432878	PgB03_g079_t14	-	1709	15	citron rho-interacting kinase			N	N	N	23.9	14.4	23.1	8.8	2.9
PgB03	1417787	1494418	PgB03_g079_t15	-	2641	22	citron rho-interacting kinase	SL	Telo	N	N	N	23.1	15.4	22.2	5.9	2.1
PgB03	1417787	1494710	PgB03_g079_t16	-	2668	22	citron rho-interacting kinase	SL	Telo	N	N	N	22.8	15.6	21.4	6.1	2.1
PgB03	1417787	1497146	PgB03_g079_t17	-	2949	24	citron rho-interacting kinase	SL	Telo	N	N	N	21.4	16.4	21.2	5.6	1.9
PgB03	1439142	1442955	PgB03_g080_t01	-	510	3	citron rho-interacting kinase			N	N	N	4.1	23.3	18.3	0.7	0.8
PgB03	1439142	1450006	PgB03_g080_t02	-	1093	7	citron rho-interacting kinase			N	N	Y	5.1	37.5	21.6	2.2	0.6
PgB03	1449037	1453437	PgB03_g080_t03	-	537	5	citron rho-interacting kinase	SL		N	Y	N	3.1	20.6	20.6	0	0.1
PgB03	1456496	1524281	PgB03_g081_t01	+	3692	19	hypothetical protein	SL	Telo	N	N	N	8.2	24.2	10.2	3.9	2.4
PgB03	1456496	1524281	PgB03_g081_t02	+	3692	19	hypothetical protein	SL	Telo	N	N	N	8.1	24.5	10.1	4.1	2.6
PgB03	1456496	1524281	PgB03_g081_t03	+	4044	18	hypothetical protein	SL	Telo	N	N	Y	7.6	20.4	9.3	3.6	2.3
PgB03	1456496	1524281	PgB03_g081_t04	+	3692	19	hypothetical protein	SL	Telo	N	N	N	7.9	24.3	10.3	4	2.3
PgB03	1456496	1524281	PgB03_g081_t05	+	3616	18	hypothetical protein	SL	Telo	N	N	N	8.4	23.1	10.1	4.3	2.3
PgB03	1456496	1524281	PgB03_g081_t06	+	3692	19	hypothetical protein	SL	Telo	N	N	N	8.1	24.9	10.5	4.1	2.3
PgB03	1456496	1524281	PgB03_g081_t07	+	3692	19	hypothetical protein	SL	Telo	N	N	N	8.4	24.9	10.3	4.1	2.4
PgB03	1456496	1524281	PgB03_g081_t08	+	3692	19	hypothetical protein	SL	Telo	N	N	N	8.4	23.5	10.1	4	2.4
PgB03	1456496	1524281	PgB03_g081_t09	+	3692	19	hypothetical protein	SL	Telo	N	N	N	8.3	23	9.8	4	2.4
PgB03	1456496	1524281	PgB03_g081_t10	+	3692	19	hypothetical protein	SL	Telo	N	N	N	8.3	23.4	9.9	4.1	2.5
PgB03	1457598	1518779	PgB03_g081_t11	+	1400	12	hypothetical protein	SL	Telo	N	N	N	9.1	32.7	13.3	5.2	3
PgB03	1457598	1518779	PgB03_g081_t12	+	1400	12	hypothetical protein	SL	Telo	N	N	N	8.9	33	12.6	5.5	3.2
PgB03	1458037	1524281	PgB03_g081_t13	+	2523	17	hypothetical protein	SL	Telo	N	N	N	9.5	29.3	13.8	4.1	2.8
PgB03	1458037	1524281	PgB03_g081_t14	+	2523	18	hypothetical protein	SL	Telo	N	Y	N	13.1	38.5	16.8	4.8	3.7
PgB03	1459865	1517436	PgB03_g081_t15	+	1516	9	hypothetical protein	SL	Telo	N	N	N	5.5	17.6	8.2	3	1.3
PgB03	1459865	1517436	PgB03_g081_t16	+	1516	9	hypothetical protein	SL	Telo	N	N	N	5.8	17.8	9	3	1.3
PgB03	1459865	1524281	PgB03_g081_t17	+	2647	17	hypothetical protein	SL	Telo	N	N	N	12.1	32	14.7	4.6	3.2
PgB03	1459865	1524281	PgB03_g081_t18	+	2839	16	hypothetical protein	SL	Telo	N	N	N	11.4	30.6	13.7	4.4	3.1
PgB03	1459865	1524281	PgB03_g081_t19	+	2839	16	hypothetical protein	SL	Telo	N	N	N	11.3	30.1	13.7	4.3	3
PgB03	1468356	1474634	PgB03_g081_t20	+	818	6	hypothetical protein			N	N	N	13.5	34.9	12.3	7.3	4.3
PgB03	1468356	1521808	PgB03_g081_t21	+	999	6	hypothetical protein	SL	Telo	N	N	N	11.3	29.4	10.2	5.9	3.6
PgB03	1471042	1474634	PgB03_g081_t22	+	459	4	hypothetical protein			N	N	N	10.9	27.9	11.7	7.2	3.2
PgB03	1471042	1524281	PgB03_g081_t23	+	1122	8	hypothetical protein	SL	Telo	N	N	N	15	32.6	16.1	3.5	3.3
PgB03	1507531	1524281	PgB03_g081_t24	+	2682	19	hypothetical protein			N	N	N	13.3	40.7	17.1	6.6	3.9
PgB03	1483290	1534470	PgB03_g082_t01	+	448	3	hypothetical protein	SL		N	Y	Y	1.1	0	0.6	0	0
PgB03	1486389	1542998	PgB03_g083_t01	-	1419	6	hypothetical protein	SL		N	N	N	10.5	210.4	1.4	7.1	0.9
PgB03	1486389	1542998	PgB03_g083_t02	-	1419	6	hypothetical protein	SL		N	N	N	10.5	210.4	1.4	7.1	0.9
PgB03	1486389	1542998	PgB03_g083_t03	-	1419	6	hypothetical protein	SL		N	Y	N	10.5	210.4	1.4	7.1	0.9
PgB03	1486389	1542998	PgB03_g083_t04	-	1419	6	hypothetical protein	SL		N	N	N	10.5	210.3	1.4	7.1	0.9
PgB03	1486389	1542998	PgB03_g083_t05	-	1419	6	hypothetical protein	SL		N	N	N	10.5	210.5	1.4	7.1	0.9
PgB03	1536806	1542997	PgB03_g083_t06	-	2175	5	hypothetical protein			N	N	Y	6.7	135.9	0.9	4.8	0.6
PgB03	1536806	1542998	PgB03_g083_t07	-	1383	6	hypothetical protein			N	N	N	10.8	215.3	1.5	7.3	0.9
PgB03	1557701	1585567	PgB03_g084_t01	+	13475	11	Hexokinase HKDC1	SL		N	N	Y	4	4.5	3.2	1.9	5.5
PgB03	1557701	1586595	PgB03_g084_t02	+	9359	13	Hexokinase HKDC1	SL		N	N	N	5.1	7.5	4.4	2.7	8.4
PgB03	1558510	1585567	PgB03_g084_t03	+	12107	12	Hexokinase HKDC1	SL		N	N	N	4.4	5	3.6	2.1	6.1
PgB03	1558510	1585567	PgB03_g084_t04	+	12150	12	Hexokinase HKDC1	SL		N	N	N	4.4	5	3.6	2.1	6.1
PgB03	1558510	1586595	PgB03_g084_t05	+	12450	13	Hexokinase HKDC1	SL		N	N	N	4.6	5.7	3.4	2.1	6.4
PgB03	1568860	1585567	PgB03_g084_t06	+	2311	11	Hexokinase HKDC1	SL		N	Y	N	12.7	25.3	16.1	10	30.4
PgB03	1569722	1586595	PgB03_g084_t07	+	2213	11	Hexokinase HKDC1			N	N	N	14.5	28.2	16.3	9.1	28.9
PgB03	1601454	1668164	PgB03_g085_t01	+	2435	6	ets domain-containing protein elk-3			N	Y	N	5.9	28.3	33.7	35.9	14.1
PgB03	1601474	1668164	PgB03_g085_t02	+	3335	5	ets domain-containing protein elk-3			N	N	Y	3.9	19.8	22.7	26	10
PgB03	1675727	1681703	PgB03_g086_t01	+	1362	6	ets translocation variant 1			N	N	N	9.8	16.4	13.7	6.4	2.1
PgB03	1675734	1682855	PgB03_g086_t02	+	1127	6	ets translocation variant 1			N	N	N	9.3	18.4	17.9	8.6	2.3
PgB03	1675914	1681703	PgB03_g086_t03	+	1586	5	ets translocation variant 1			N	Y	Y	8.4	14.2	11.8	6	1.8
PgB03	1682435	1682855	PgB03_g086_t04	+	421	1	hypothetical protein			N	N	N	5.3	6.8	8.2	0	0.3
PgB03	1686348	1693291	PgB03_g087_t01	+	1608	5	ETS domain-containing protein Elk-1	SL		N	Y	Y	1.5	38.7	10.5	0	0
PgB03	1686348	1693291	PgB03_g087_t02	+	1608	5	ETS domain-containing protein Elk-1	SL		N	N	N	1.5	38.7	10.5	0	0
PgB03	1686348	1693291	PgB03_g087_t03	+	1608	5	ETS domain-containing protein Elk-1	SL		N	N	N	1.5	38.7	10.5	0	0
PgB03	1702789	1731227	PgB03_g088_t01	-	3998	21	Maltase-glucoamylase-like protein	SL		N	Y	Y	0.7	0	3.8	17.1	3.6
PgB03	1737269	1743558	PgB03_g089_t01	+	687	6	hypothetical protein		Telo	N	Y	Y	2	1.3	0	1.3	0.1
PgB03	1742811	1764152	PgB03_g090_t01	-	4208	21	maltase- intestinal		Telo	N	N	N	20.5	0.6	53.8	502.6	75
PgB03	1742811	1765456	PgB03_g090_t02	-	5512	20	maltase- intestinal		Telo	N	Y	Y	15.6	0.4	41.1	383.6	57.3
PgB03	1742811	1768485	PgB03_g090_t03	-	4292	21	maltase- intestinal		Telo	N	N	N	20.2	0.6	52.9	493	73.6
PgB03	1742811	1768544	PgB03_g090_t04	-	4351	22	maltase- intestinal		Telo	N	N	N	19.9	0.6	52.4	486.6	72.6
PgB03	1742811	1768544	PgB03_g090_t05	-	4351	21	maltase- intestinal		Telo	N	N	N	19.9	0.6	52.4	486.6	72.6
PgB03	1769829	1797358	PgB03_g091_t01	-	2550	19	Calcium-dependent secretion activator			N	N	N	3.3	5.1	5.8	24.7	11.2
PgB03	1769829	1801567	PgB03_g091_t02	-	3423	22	Calcium-dependent secretion activator	SL		N	N	N	3.1	5.2	5.1	24.5	11.4
PgB03	1769829	1801567	PgB03_g091_t03	-	3441	22	Calcium-dependent secretion activator	SL		N	N	N	3.1	5.2	5.1	24.4	11.4
PgB03	1769829	1815442	PgB03_g091_t04	-	5047	31	Calcium-dependent secretion activator	SL		N	Y	N	3.6	4	4.5	25.6	11.7
PgB03	1769829	1815442	PgB03_g091_t05	-	5083	32	Calcium-dependent secretion activator	SL		N	N	N	3.6	3.9	4.4	24.8	11.6
PgB03	1769829	1815442	PgB03_g091_t06	-	5047	31	Calcium-dependent secretion activator	SL		N	N	N	3.6	4	4.5	25.6	11.7
PgB03	1769829	1815442	PgB03_g091_t07	-	5029	31	Calcium-dependent secretion activator	SL		N	N	N	3.6	4	4.5	25.7	11.7
PgB03	1769829	1823450	PgB03_g091_t08	-	4781	34	Calcium-dependent secretion activator	SL		N	N	N	3.6	4.2	4.6	24.9	12.4
PgB03	1769829	1823450	PgB03_g091_t09	-	4745	33	Calcium-dependent secretion activator	SL		N	N	N	3.6	4.2	4.7	25.8	12.5
PgB03	1769829	1825557	PgB03_g091_t10	-	6834	33	Calcium-dependent secretion activator	SL		N	N	Y	2.7	2.9	3.5	18.4	8.7
PgB03	1769829	1825557	PgB03_g091_t11	-	6834	33	Calcium-dependent secretion activator	SL		N	N	N	2.7	2.9	3.5	18.4	8.7
PgB03	1798923	1815442	PgB03_g091_t12	-	2305	12	Calcium-dependent secretion activator	SL		N	N	N	3.6	2.3	2.3	23.3	9.9
PgB03	1798923	1815442	PgB03_g091_t13	-	2305	12	Calcium-dependent secretion activator	SL		N	N	N	3.6	2.3	2.3	23.3	9.9
PgB03	1859556	1877720	PgB03_g092_t01	-	4574	23	Uncharacterized protein F54D1.6	SL		N	N	N	9.4	6.6	16.2	59	10.4
PgB03	1859556	1877720	PgB03_g092_t02	-	4574	24	Uncharacterized protein F54D1.6	SL		N	N	N	9.4	6.6	16.2	59	10.4
PgB03	1859556	1885980	PgB03_g092_t03	-	6069	31	Uncharacterized protein F54D1.6	SL		N	N	Y	9.6	5.1	15.4	60.3	10.2
PgB03	1859556	1886536	PgB03_g092_t04	-	5727	31	Uncharacterized protein F54D1.6	SL		N	N	N	10	5.4	16.2	62.7	10.6
PgB03	1859556	1886536	PgB03_g092_t05	-	5398	32	Uncharacterized protein F54D1.6	SL		N	N	N	10.6	5.8	17.3	67.1	11.4
PgB03	1859556	1886536	PgB03_g092_t06	-	5727	32	Uncharacterized protein F54D1.6	SL		N	N	N	10	5.4	16.2	62.7	10.6
PgB03	1859556	1886536	PgB03_g092_t07	-	5398	33	Uncharacterized protein F54D1.6	SL		N	Y	N	10.6	5.8	17.3	67.1	11.4
PgB03	1880105	1886536	PgB03_g092_t08	-	895	7	Uncharacterized protein F54D1.6	SL		N	N	N	11.5	0.9	12.8	82.7	11.3
PgB03	1887394	1890231	PgB03_g093_t01	.	2838	1	hypothetical protein			N	Y	Y	0	0	0.7	0.9	0.2
PgB03	1892163	1892780	PgB03_g094_t01	.	618	1	hypothetical protein			N	Y	Y	0.3	4.1	7.6	0	0
PgB03	1893166	1917062	PgB03_g095_t01	-	3848	25	Uncharacterized protein F54D1.6	SL		N	N	N	5.3	21.9	14.9	1.6	0.2
PgB03	1893166	1923323	PgB03_g095_t02	-	4655	30	Uncharacterized protein F54D1.6	SL		N	N	Y	5.1	21.1	13	1.5	0.3
PgB03	1893166	1923323	PgB03_g095_t03	-	4655	30	Uncharacterized protein F54D1.6	SL		N	N	N	5.1	21.1	13	1.5	0.3
PgB03	1893166	1923323	PgB03_g095_t04	-	4655	30	Uncharacterized protein F54D1.6	SL		N	Y	N	5.1	21.1	13	1.5	0.3
PgB03	1938530	1941823	PgB03_g096_t01	+	1217	4	hypothetical protein			N	N	N	0	0	0.8	0.8	39.6
PgB03	1938530	1947446	PgB03_g096_t02	+	1198	6	hypothetical protein			N	Y	N	0	0	0.8	0.4	49.8
PgB03	1938530	1955028	PgB03_g096_t03	+	969	7	hypothetical protein	SL	Telo	N	N	N	8.1	92.2	55.9	73	356.3
PgB03	1939077	1947446	PgB03_g096_t04	+	1523	6	hypothetical protein			N	N	N	0	0	0.6	0.3	39.3
PgB03	1939077	1954052	PgB03_g096_t05	+	1294	6	hypothetical protein	SL	Telo	N	N	N	6	69.1	41.9	54.7	267
PgB03	1939077	1955028	PgB03_g096_t06	+	1294	6	hypothetical protein	SL	Telo	N	N	N	6	69.1	41.9	54.7	267
PgB03	1939390	1941823	PgB03_g096_t07	+	1229	4	hypothetical protein			N	N	N	0	0	0.8	0.7	39.3
PgB03	1939475	1941823	PgB03_g096_t08	+	1530	3	hypothetical protein			N	N	Y	0	0	0.7	0.6	31.5
PgB03	1939475	1947446	PgB03_g096_t09	+	1511	5	hypothetical protein			N	N	N	0	0	0.6	0.3	39.4
PgB03	1947984	1948291	PgB03_g097_t01	.	308	1	hypothetical protein			N	Y	Y	0	0	0	2.5	4.5
PgB03	1969440	1973526	PgB03_g098_t01	+	396	3	hypothetical protein	SL		N	Y	Y	0.6	0.9	681.2	0.7	0.7
PgB03	1969440	1973526	PgB03_g098_t02	+	396	4	hypothetical protein	SL		N	N	N	0.6	0.9	681.2	0.7	0.7
PgB03	1973659	1977008	PgB03_g099_t01	+	940	3	hypothetical protein			N	N	Y	0.4	1.3	485.1	0.6	0.1
PgB03	1974794	1977008	PgB03_g099_t02	+	889	3	hypothetical protein			N	Y	N	0.4	1.4	593.6	0.8	0.2
PgB03	2002110	2007132	PgB03_g100_t01	-	766	4	40S ribosomal protein S11	SL	Telo	N	N	Y	144.1	445.6	132.2	230	158.6
PgB03	2002110	2007132	PgB03_g100_t02	-	766	3	40S ribosomal protein S11	SL	Telo	N	Y	N	144.1	445.6	132.2	230	158.6
PgB03	2015465	2016263	PgB03_g101_t01	.	799	1	FMRFamide receptor			N	Y	Y	10.5	0	3	0	0.3
PgB03	2032074	2039171	PgB03_g102_t01	-	1101	3	Calpain clp-1			N	N	N	112.7	0	10.4	2.3	0.9
PgB03	2032074	2042643	PgB03_g102_t02	-	1197	7	Calpain clp-1		Telo	N	Y	Y	153	0	16	4.1	1.4
PgB03	2044399	2062011	PgB03_g103_t01	-	2595	15	Calpain clp-1	SL		N	N	N	4.3	9.3	7.9	9.1	4
PgB03	2044399	2062057	PgB03_g103_t02	-	2641	16	Calpain clp-1	SL		N	N	N	4.3	9.1	7.8	9.2	4
PgB03	2044399	2062057	PgB03_g103_t03	-	2558	16	Calpain clp-1	SL		N	N	N	4.5	9.5	8	9.2	4.4
PgB03	2044399	2063604	PgB03_g103_t04	-	3241	16	Calpain clp-1	SL		N	N	Y	3.6	7.8	6.3	7.6	3.6
PgB03	2059853	2062011	PgB03_g103_t05	-	422	3	Calpain clp-1	SL		N	Y	N	4.2	12.5	12.5	15.3	5.6
PgB03	2066848	2079134	PgB03_g104_t01	+	1762	10	ATP-binding cassette sub-family B member 8			N	N	N	5.7	20.2	4.4	2	1.1
PgB03	2066848	2079678	PgB03_g104_t02	+	2306	9	ATP-binding cassette sub-family B member 8			N	N	Y	4.5	18.1	3.3	1.8	0.9
PgB03	2066848	2079678	PgB03_g104_t03	+	1838	9	ATP-binding cassette sub-family B member 8			N	N	N	5	18.3	2.9	2.1	1.1
PgB03	2066897	2069345	PgB03_g104_t04	+	597	2	ATP-binding cassette sub-family B member 8			N	N	N	2.4	3.5	2.5	3.9	0.4
PgB03	2074806	2079134	PgB03_g104_t05	+	889	5	ATP-binding cassette sub-family B member 8			N	Y	N	8.3	31.8	3.4	0.3	0.4
PgB03	2081020	2085023	PgB03_g105_t01	+	1084	2	hypothetical protein			N	N	N	0.4	2.4	0	0	0
PgB03	2081020	2085023	PgB03_g105_t02	+	1518	3	hypothetical protein			N	Y	Y	0.4	3.2	0.9	0	0
PgB03	2094925	2098916	PgB03_g106_t01	+	1561	6	msp-domain protein 4		Telo	N	Y	N	993	4.8	9.1	21.3	10.9
PgB03	2094925	2098916	PgB03_g106_t02	+	1651	7	msp-domain protein 4		Telo	N	N	N	956.3	4.8	8.5	19.1	10.2
PgB03	2094984	2098916	PgB03_g106_t03	+	2787	5	msp-domain protein 4		Telo	N	N	Y	548.7	2.8	5.1	11.4	5.8
PgB03	2095846	2098916	PgB03_g106_t04	+	1724	6	msp-domain protein 4		Telo	N	N	N	836.8	4.5	8.2	17.6	8.8
PgB03	2101570	2122806	PgB03_g107_t01	+	7713	10	GDP-fucose transporter	SL		N	N	Y	15.5	7.7	7.2	3.1	1.5
PgB03	2101997	2122806	PgB03_g107_t02	+	6598	10	GDP-fucose transporter	SL		N	Y	N	9.1	5.2	5.3	2.4	1.1
PgB03	2107554	2122806	PgB03_g107_t03	+	7609	9	GDP-fucose transporter	SL		N	N	N	16.4	7.3	7.1	2.8	1.5
PgB03	2114068	2121197	PgB03_g108_t01	-	5382	4	complement component c6			N	N	N	23.8	6.1	6.2	2.1	1.5
PgB03	2114068	2121686	PgB03_g108_t02	-	5871	4	complement component c6			N	N	N	23	5.6	5.6	1.9	1.4
PgB03	2114068	2121686	PgB03_g108_t03	-	3201	4	complement component c6			N	N	N	31.2	3.5	5.9	1.4	1.8
PgB03	2114068	2125362	PgB03_g108_t04	-	7932	5	complement component c6		Telo	N	N	N	21.8	4.2	4.2	1.7	1.2
PgB03	2114068	2125362	PgB03_g108_t05	-	7932	5	complement component c6		Telo	N	N	N	21.8	4.2	4.2	1.7	1.2
PgB03	2114068	2125362	PgB03_g108_t06	-	7932	6	complement component c6		Telo	N	N	N	21.8	4.2	4.2	1.7	1.2
PgB03	2114068	2125365	PgB03_g108_t07	-	6609	7	complement component c6		Telo	N	N	N	25.6	5	5.1	2	1.4
PgB03	2114068	2125365	PgB03_g108_t08	-	6510	8	complement component c6		Telo	N	N	N	25.9	5.1	5.2	2.1	1.4
PgB03	2114068	2125365	PgB03_g108_t09	-	6476	8	complement component c6		Telo	N	N	N	26	5.1	5.2	2.1	1.4
PgB03	2114068	2125365	PgB03_g108_t10	-	3874	8	complement component c6		Telo	N	N	N	34.6	2.9	5	1.8	1.7
PgB03	2114068	2125365	PgB03_g108_t11	-	6544	7	complement component c6		Telo	N	N	N	25.8	5	5.1	2.1	1.4
PgB03	2114068	2133460	PgB03_g108_t12	-	8742	12	complement component c6		Telo	N	N	N	25.4	3.8	4	1.6	1.1
PgB03	2114068	2133460	PgB03_g108_t13	-	8810	12	complement component c6		Telo	N	N	Y	25.3	3.7	3.9	1.5	1.1
PgB03	2114068	2133460	PgB03_g108_t14	-	8742	12	complement component c6		Telo	N	Y	N	20.6	2.8	2.5	1.1	0.8
PgB03	2123037	2125365	PgB03_g108_t15	-	1406	3	complement component c6		Telo	N	N	N	14.6	0.6	1.3	0.7	0.4
PgB03	2123037	2133460	PgB03_g108_t16	-	3706	8	complement component c6		Telo	N	N	N	20.1	0.2	0.7	0.3	0.4
PgB03	2126464	2133460	PgB03_g108_t17	-	1592	7	complement component c6			N	N	N	30.7	0	0.6	0.1	0.5
PgB03	2135502	2147103	PgB03_g109_t01	+	1655	12	hypothetical protein	SL		N	N	N	66.9	2.8	0.4	0.7	0.6
PgB03	2137844	2147103	PgB03_g109_t02	+	1947	8	hypothetical protein	SL		N	Y	Y	43	3.6	1.7	0.5	0.5
PgB03	2152667	2162238	PgB03_g110_t01	+	1284	9	Cleavage and polyadenylation specificity factor subunit 4			N	Y	Y	8	15.4	5.3	6.1	3.2
PgB03	2152667	2162238	PgB03_g110_t02	+	1284	10	Cleavage and polyadenylation specificity factor subunit 4			N	N	N	8	15.5	5.3	6.1	3.2
PgB03	2152667	2162238	PgB03_g110_t03	+	1284	10	Cleavage and polyadenylation specificity factor subunit 4			N	N	N	8	15.4	5.3	6.1	3.2
PgB03	2154753	2162238	PgB03_g110_t04	+	1119	9	Cleavage and polyadenylation specificity factor subunit 4			N	N	N	8.5	16.2	6.1	7	3.2
PgB03	2163590	2169987	PgB03_g111_t01	+	762	5	Cleavage and polyadenylation specificity factor subunit 4			N	N	Y	5.9	18.1	15	4.1	5.8
PgB03	2163590	2169987	PgB03_g111_t02	+	762	5	Cleavage and polyadenylation specificity factor subunit 4			N	Y	N	5.9	18.1	15	4.1	5.8
PgB03	2163590	2169987	PgB03_g111_t03	+	762	5	Cleavage and polyadenylation specificity factor subunit 4			N	N	N	5.9	18.1	15	4.1	5.8
PgB03	2163596	2169987	PgB03_g111_t04	+	756	5	Cleavage and polyadenylation specificity factor subunit 4			N	N	N	5.9	18.2	15.1	4.1	5.8
PgB03	2164908	2169987	PgB03_g111_t05	+	762	5	Cleavage and polyadenylation specificity factor subunit 4			N	N	N	5.9	18.1	15	4.1	5.8
PgB03	2164908	2169987	PgB03_g111_t06	+	762	5	Cleavage and polyadenylation specificity factor subunit 4			N	N	N	5.9	18.1	15	4.1	5.8
PgB03	2171979	2200115	PgB03_g112_t01	+	4280	14	hypothetical protein			N	N	Y	3.3	4.7	7.2	2.5	1.6
PgB03	2171979	2203559	PgB03_g112_t02	+	3346	15	hypothetical protein			N	N	N	3.7	6.5	9.3	2.4	2.1
PgB03	2171979	2203559	PgB03_g112_t03	+	2621	16	hypothetical protein			N	Y	N	4.2	8	11.6	3.1	2.6
PgB03	2177426	2203559	PgB03_g112_t04	+	1961	11	hypothetical protein			N	N	N	3.6	7.3	11	3.6	2.7
PgB03	2177480	2201702	PgB03_g112_t05	+	1345	10	hypothetical protein			N	N	N	4.5	10.1	13.2	5.2	3.7
PgB03	2193197	2203559	PgB03_g112_t06	+	1495	8	hypothetical protein			N	N	N	3.4	5.2	8.8	3.6	2.6
PgB03	2209955	2218423	PgB03_g113_t01	+	4014	4	ubiquitin-conjugating enzyme e2 1			N	N	Y	10.2	13.5	12.7	12.3	15.7
PgB03	2211413	2218423	PgB03_g113_t02	+	3328	4	ubiquitin-conjugating enzyme e2 1			N	Y	N	11.7	14.3	13.6	13.8	17.3
PgB03	2219004	2225702	PgB03_g114_t01	+	1572	7	ubiquitin-conjugating enzyme e2 1			N	Y	Y	27.5	108.8	29.8	11.4	13.6
PgB03	2228093	2230917	PgB03_g115_t01	+	734	3	UPF0562 protein C29E4.12	SL		N	Y	Y	17.3	34.4	47.9	87.6	43.7
PgB03	2228223	2236890	PgB03_g115_t02	+	491	3	UPF0562 protein C29E4.12	SL		N	N	N	25.8	50.5	71.6	131	63.8
PgB03	2232693	2243866	PgB03_g116_t01	+	2545	7	Condensin-2 complex subunit H2			N	N	N	6.3	29.6	13.1	4.3	1
PgB03	2234043	2243866	PgB03_g116_t02	+	3162	6	Condensin-2 complex subunit H2			N	N	Y	3.8	11.4	10.1	3.6	0.5
PgB03	2234688	2243866	PgB03_g116_t03	+	1586	7	Condensin-2 complex subunit H2			N	Y	N	6.9	20.6	17.6	6.8	1.5
PgB03	2240144	2243174	PgB03_g116_t04	+	2290	2	Condensin-2 complex subunit H2			N	N	N	2.1	7.8	6.2	1.2	0.4
PgB03	2240144	2243866	PgB03_g116_t05	+	1826	4	Condensin-2 complex subunit H2			N	N	N	3.8	13.1	10.9	4.1	1
PgB03	2240144	2243866	PgB03_g116_t06	+	1733	4	Condensin-2 complex subunit H2			N	N	N	5.3	17.7	10.9	4.8	1
PgB03	2251491	2253514	PgB03_g117_t01	+	795	2	hypothetical protein			N	Y	Y	1.7	0.4	0.4	1	0.2
PgB03	2253596	2257371	PgB03_g118_t01	.	3776	1	hypothetical protein			N	Y	Y	18.1	5.8	14.1	5.9	2
PgB03	2263210	2269752	PgB03_g119_t01	-	1835	7	Rab-like protein 3		Telo	N	N	N	23.9	19	11.1	8.6	6
PgB03	2263210	2271326	PgB03_g119_t02	-	2095	8	Rab-like protein 3		Telo	N	N	N	22.7	23.9	16.9	8.1	6.4
PgB03	2263210	2274638	PgB03_g119_t03	-	1945	7	Rab-like protein 3		Telo	N	N	N	21.3	17.9	10.7	9.4	5.5
PgB03	2263210	2275524	PgB03_g119_t04	-	1798	8	Rab-like protein 3		Telo	N	N	N	24.9	25.7	14.2	8.5	6.8
PgB03	2263210	2323225	PgB03_g119_t05	-	1164	7	Rab-like protein 3	SL	Telo	N	Y	N	31.5	23.2	10.9	6.9	7.2
PgB03	2263210	2332923	PgB03_g119_t06	-	2568	13	Transmembrane protein 185B	SL	Telo	N	N	Y	17.7	20.7	18.9	13	6.1
PgB03	2270308	2271326	PgB03_g119_t07	-	1019	1	hypothetical protein			N	N	N	5.1	14.8	18.4	3.1	2.4
PgB03	2326382	2331517	PgB03_g119_t08	-	1134	6	Transmembrane protein 185B			N	N	N	6.1	17.4	23.1	14.5	4.2
PgB03	2326382	2332976	PgB03_g119_t09	-	1170	6	Transmembrane protein 185B			N	N	N	6.3	20.1	28.1	17.9	4.7
PgB03	2265865	2268257	PgB03_g120_t01	+	433	3	Rab-like protein 3			N	Y	Y	3.1	1.7	3.1	30.8	0.8
PgB03	2280937	2283110	PgB03_g121_t01	-	2051	2	homeobox-containing protein 1			N	Y	Y	0.2	2.9	3.5	0.2	0.2
PgB03	2292654	2296120	PgB03_g122_t01	+	988	3	zonadhesin			N	Y	Y	3.1	12.3	5.2	3.7	19
PgB03	2294002	2296120	PgB03_g122_t02	+	710	2	zonadhesin			N	N	N	4.2	13.8	5	3.3	22
PgB03	2301014	2306136	PgB03_g123_t01	-	2844	4	Condensin-2 complex subunit H2			N	Y	Y	3.4	2.3	2.4	1.3	0.4
PgB03	2306595	2313315	PgB03_g124_t01	-	2903	8	Condensin-2 complex subunit H2	SL		N	N	N	4.4	30.1	8.4	2.7	1.2
PgB03	2306595	2313315	PgB03_g124_t02	-	4511	5	Condensin-2 complex subunit H2	SL		N	N	Y	4.1	25.7	7.3	2.7	0.7
PgB03	2306595	2313315	PgB03_g124_t03	-	4473	5	Condensin-2 complex subunit H2	SL		N	N	N	3.9	30.3	7.3	2.5	0.7
PgB03	2307913	2313242	PgB03_g124_t04	-	2379	5	Condensin-2 complex subunit H2	SL		N	Y	N	4.8	46.6	9.5	3.1	1.1
PgB03	2307913	2313242	PgB03_g124_t05	-	2731	6	Condensin-2 complex subunit H2	SL		N	N	N	5.3	35.9	11.2	4.2	1.2
PgB03	2334522	2349852	PgB03_g125_t01	+	3786	18	26S proteasome non-ATPase regulatory subunit 2	SL		N	N	N	16.2	20.9	14.5	13.3	6.5
PgB03	2334522	2349852	PgB03_g125_t02	+	4446	17	26S proteasome non-ATPase regulatory subunit 2	SL		N	N	Y	13.6	18.3	12.3	11.2	5.6
PgB03	2334530	2343566	PgB03_g125_t03	+	1756	12	26S proteasome non-ATPase regulatory subunit 2	SL		N	Y	N	22.3	32.2	18.8	20	9.6
PgB03	2347887	2354637	PgB03_g126_t01	-	3395	5	hypothetical protein			N	Y	Y	10.5	2.4	4.1	0.2	0.7
PgB03	2347887	2354637	PgB03_g126_t02	-	3040	6	hypothetical protein			N	N	N	9.8	1.3	3.2	0.1	0.5
PgB03	2354722	2355032	PgB03_g127_t01	.	311	1	hypothetical protein			N	Y	Y	1.2	0	2.7	0	0
PgB03	2359804	2361843	PgB03_g128_t01	-	821	3	26S proteasome non-ATPase regulatory subunit 2			N	N	Y	0	2.1	5.3	0.2	0.1
PgB03	2359804	2362379	PgB03_g128_t02	-	535	3	26S proteasome non-ATPase regulatory subunit 2			N	Y	N	0	1.9	7.7	0.1	0.1
PgB03	2371438	2406253	PgB03_g129_t01	-	2649	17	Protein kinase C-like 1			N	Y	N	2.2	5.3	6.3	7.4	7.9
PgB03	2371438	2431842	PgB03_g129_t02	-	2683	17	Protein kinase C-like 1			N	N	Y	2.2	5.4	6.3	7.6	8.7
PgB03	2467814	2474560	PgB03_g130_t01	+	990	6	Cuticle collagen lon-3			N	N	N	2.1	30.6	5.6	0	0
PgB03	2471399	2474560	PgB03_g130_t02	+	1058	6	Cuticle collagen lon-3			N	Y	N	1.9	28.6	5.2	0	0
PgB03	2471676	2474560	PgB03_g130_t03	+	1059	6	Cuticle collagen lon-3			N	N	Y	2.2	27.9	5.2	0	0
PgB03	2481143	2481412	PgB03_g131_t01	-	270	1	prolactin-releasing peptide receptor			N	Y	Y	0	0	0	0	0
PgB03	2548246	2560940	PgB03_g132_t01	+	1081	8	protein wnt-2			N	Y	Y	0.2	0.8	3.5	3.2	1
PgB03	2571733	2597690	PgB03_g133_t01	-	3644	10	zinc finger protein 1			N	N	N	6.2	18.1	16.8	0.3	0.2
PgB03	2571733	2597697	PgB03_g133_t02	-	2272	11	zinc finger protein 1			N	Y	N	8	29.1	27.3	0.5	0.4
PgB03	2571733	2597697	PgB03_g133_t03	-	3729	10	zinc finger protein 1			N	N	Y	6.3	18	18.1	0.3	0.2
PgB03	2648853	2652300	PgB03_g134_t01	-	1162	4	Histone H2B.1/H2B.2			N	Y	Y	22.2	83	223.9	40.5	10.7
PgB03	2654894	2676557	PgB03_g135_t01	+	2587	19	Wings apart-like protein			N	N	N	6.3	11.3	19.2	7.2	3.1
PgB03	2657242	2676557	PgB03_g135_t02	+	2733	18	Wings apart-like protein			N	Y	Y	6	10.7	18.5	6.9	2.9
PgB03	2657341	2676046	PgB03_g135_t03	+	2443	17	Wings apart-like protein			N	N	N	6.7	11.9	20.7	7.7	3.2
PgB03	2657451	2662591	PgB03_g135_t04	+	1089	4	Wings apart-like protein			N	N	N	6.6	10.4	17.8	7.3	1.9
PgB03	2658030	2676557	PgB03_g135_t05	+	2554	18	Wings apart-like protein			N	N	N	6.4	11.4	19.4	7.3	3.1
PgB03	2658030	2676557	PgB03_g135_t06	+	2554	18	Wings apart-like protein			N	N	N	6.4	11.4	19.4	7.3	3.1
PgB03	2658036	2676046	PgB03_g135_t07	+	2357	17	Wings apart-like protein			N	N	N	6.9	12.3	21	7.9	3.3
PgB03	2658053	2662591	PgB03_g135_t08	+	1096	4	Wings apart-like protein			N	N	N	6.6	10.4	17.7	7.2	1.9
PgB03	2658060	2676046	PgB03_g135_t09	+	2333	17	Wings apart-like protein			N	N	N	7	12.2	21.1	8	3.4
PgB03	2678464	2679067	PgB03_g136_t01	.	604	1	hypothetical protein			N	Y	Y	3.6	2.8	6.7	1.5	1.4
PgB03	2680021	2688549	PgB03_g137_t01	+	1430	10	methylglutaconyl		Telo	N	N	N	0.2	284	97.8	1.4	1
PgB03	2680021	2688549	PgB03_g137_t02	+	1447	10	methylglutaconyl		Telo	N	Y	Y	0.2	280.6	96.7	1.3	1
PgB03	2682686	2684927	PgB03_g137_t03	+	833	4	methylglutaconyl			N	N	N	0	208	63.6	1.9	1.3
PgB03	2685028	2688549	PgB03_g137_t04	+	380	3	methylglutaconyl		Telo	N	N	N	0.3	349.8	145.5	1	1.2
PgB03	2692480	2700476	PgB03_g138_t01	+	1258	9	methylglutaconyl			N	Y	Y	8.6	18.1	22.9	27.2	29.3
PgB03	2694050	2700476	PgB03_g138_t02	+	1038	8	methylglutaconyl			N	N	N	8.5	19.3	26.3	30	32.7
PgB03	2696536	2700476	PgB03_g138_t03	+	717	5	methylglutaconyl			N	N	N	10.5	17.4	30.2	28.6	35.3
PgB03	2702383	2716885	PgB03_g139_t01	-	3593	14	bifunctional heparan sulfate n-deacetylase n-sulfotransferase 1			N	Y	N	10.9	28.8	24.8	10.8	4
PgB03	2702383	2717515	PgB03_g139_t02	-	3807	14	bifunctional heparan sulfate n-deacetylase n-sulfotransferase 1			N	N	Y	10.3	27.3	23.9	10.2	3.8
PgB03	2704266	2716844	PgB03_g139_t03	-	2673	14	bifunctional heparan sulfate n-deacetylase n-sulfotransferase 1			N	N	N	13.8	37	29.7	14.5	5.2
PgB03	2704266	2716952	PgB03_g139_t04	-	2781	15	bifunctional heparan sulfate n-deacetylase n-sulfotransferase 1			N	N	N	13.3	35.7	29.1	14	5
PgB03	2704266	2717368	PgB03_g139_t05	-	2781	15	bifunctional heparan sulfate n-deacetylase n-sulfotransferase 1			N	N	N	13.3	35.7	29.3	14	5
PgB03	2704266	2717515	PgB03_g139_t06	-	2928	14	bifunctional heparan sulfate n-deacetylase n-sulfotransferase 1			N	N	N	12.6	34.1	27.8	13.3	4.8
PgB03	2718239	2728663	PgB03_g140_t01	+	1624	10	COP9 signalosome complex subunit 2	SL	Telo	N	Y	Y	44.6	72.6	32.4	50.9	26.7
PgB03	2719291	2728663	PgB03_g140_t02	+	1544	10	COP9 signalosome complex subunit 2	SL	Telo	N	N	N	47	76.5	33	53.5	28.1
PgB03	2731628	2734613	PgB03_g141_t01	+	1402	4	Chromatin modification-related protein MEAF6	SL		N	Y	N	6.7	27.7	40	5.4	4
PgB03	2731628	2744601	PgB03_g141_t02	+	3022	13	actin-related protein 10	SL		N	N	N	8.2	27.5	25.1	10.9	6.9
PgB03	2732156	2744601	PgB03_g141_t03	+	2833	13	actin-related protein 10			N	N	N	8.2	25.9	24.4	11.3	7
PgB03	2736495	2744601	PgB03_g141_t04	+	3030	9	actin-related protein 10			N	N	Y	5.9	17.4	13.7	8.8	5.4
PgB03	2749124	2752189	PgB03_g142_t01	+	567	3	hypothetical protein			N	Y	Y	0.1	0.8	2.2	0	0
PgB03	2755625	2760439	PgB03_g143_t01	+	1203	4	cre-mlt-10 protein			N	Y	Y	0.5	0.3	3.8	0	0
PgB03	2790469	2796948	PgB03_g144_t01	+	4271	3	hypothetical protein		Telo	N	N	N	1.5	0	0.2	0.3	20.4
PgB03	2790469	2809204	PgB03_g144_t02	+	4625	18	Location of vulva defective 1		Telo	N	N	Y	0.9	0.1	0.3	0.8	13.6
PgB03	2790469	2809472	PgB03_g144_t03	+	2973	20	Location of vulva defective 1		Telo	N	Y	N	0.4	0	0	0	16.6
PgB03	2790658	2796948	PgB03_g144_t04	+	4533	3	hypothetical protein		Telo	N	N	N	1.3	0	0.2	0.3	17.8
PgB03	2790658	2801810	PgB03_g144_t05	+	3168	10	hypothetical protein		Telo	N	N	N	1.5	0	0.3	0.4	21.5
PgB03	2793128	2796948	PgB03_g144_t06	+	989	4	hypothetical protein		Telo	N	N	N	1.5	0	0	0.5	44.3
PgB03	2794116	2796948	PgB03_g144_t07	+	2833	1	hypothetical protein		Telo	N	N	N	0.6	0	0	0	20
PgB03	2801377	2816385	PgB03_g145_t01	-	2762	18	Location of vulva defective 1			N	Y	Y	0.3	0.7	0.7	4.4	1.3
PgB03	2818462	2819626	PgB03_g146_t01	-	945	2	Location of vulva defective 1			N	Y	Y	0	0	0.1	1.8	0.3
PgB03	2820097	2840051	PgB03_g147_t01	-	3873	23	Location of vulva defective 1	SL		N	N	Y	0.8	1.8	1.7	5.6	0.7
PgB03	2820527	2840051	PgB03_g147_t02	-	3383	23	Location of vulva defective 1	SL		N	N	N	0.8	2.1	2	6.2	0.8
PgB03	2834878	2838380	PgB03_g147_t03	-	678	5	Location of vulva defective 1	SL		N	Y	N	0.9	2.5	1.9	10.3	0.7
PgB03	2851615	2870973	PgB03_g148_t01	-	3616	13	LanC-like protein 3	SL		N	N	N	14.2	24.4	9.9	5.7	5.5
PgB03	2851615	2870973	PgB03_g148_t02	-	3742	14	LanC-like protein 3	SL		N	Y	Y	13.3	22.7	9.8	5.2	5.2
PgB03	2855041	2855420	PgB03_g148_t03	-	111	2	LanC-like protein 3			N	N	N	10.3	9.1	12.8	1	1.3
PgB03	2856969	2860961	PgB03_g148_t04	-	880	5	LanC-like protein 3	SL		N	N	N	23.2	38.7	17.9	6.6	7
PgB03	2855554	2855783	PgB03_g149_t01	+	230	1	LanC-like protein 3			N	Y	Y	10.4	16.6	6.9	7.3	3.8
PgB03	2884918	2890149	PgB03_g150_t01	+	326	3	Uncharacterized protein T05H10.3	SL		N	N	N	0	0	0	0	7.4
PgB03	2884918	2891409	PgB03_g150_t02	+	906	4	Uncharacterized protein T05H10.3	SL		N	Y	Y	0.1	0.3	0	0	5.2
PgB03	2897108	2898741	PgB03_g151_t01	+	398	2	Uncharacterized protein T05H10.3			N	Y	Y	1	1.8	0	0	0
PgB03	2901068	2909065	PgB03_g152_t01	+	958	7	acyl- dehydrogenase family member 10			N	Y	Y	10.4	8.2	8.3	24.2	7.8
PgB03	2908214	2925310	PgB03_g153_t01	-	7039	15	Protein FAM65B	SL		N	N	N	19.9	16.8	16.2	31.3	6.4
PgB03	2908214	2925310	PgB03_g153_t02	-	7039	15	Protein FAM65B	SL		N	N	N	19.9	16.8	16.2	31.3	6.4
PgB03	2908214	2925310	PgB03_g153_t03	-	7120	16	Protein FAM65B	SL		N	N	Y	19.9	16.8	16.3	31.7	6.4
PgB03	2908214	2956416	PgB03_g153_t04	-	6378	23	Protein FAM65B	SL		N	N	N	24.9	24.2	21.7	30.8	7.5
PgB03	2908214	2956416	PgB03_g153_t05	-	6378	23	Protein FAM65B	SL		N	Y	N	24.8	24	21.5	30.6	7.4
PgB03	2908214	2964689	PgB03_g153_t06	-	6683	25	Protein FAM65B	SL		N	N	N	24.3	25.8	22.6	29.4	7.3
PgB03	2908214	2964755	PgB03_g153_t07	-	6749	25	Protein FAM65B	SL		N	N	N	24	25.6	22.4	29.1	7.2
PgB03	2908214	2964760	PgB03_g153_t08	-	6754	25	Protein FAM65B	SL		N	N	N	24	25.6	22.3	29	7.2
PgB03	2908214	2964760	PgB03_g153_t09	-	6754	25	Protein FAM65B	SL		N	N	N	24	25.6	22.3	29	7.2
PgB03	2908214	2982232	PgB03_g153_t10	-	6777	25	Protein FAM65B	SL		N	N	N	24	25.4	22	28.9	7.2
PgB03	2908214	2990051	PgB03_g153_t11	-	6982	26	Protein FAM65B	SL		N	N	N	23.3	24.7	21.3	28.1	7
PgB03	2908214	2990051	PgB03_g153_t12	-	6982	26	Protein FAM65B	SL		N	N	N	23.3	24.7	21.3	28.1	7
PgB03	2908214	2990051	PgB03_g153_t13	-	6982	26	Protein FAM65B	SL		N	N	N	23.3	24.7	21.3	28.1	7
PgB03	2994516	2994995	PgB03_g154_t01	+	276	2	hypothetical protein			N	Y	Y	0	0	0	0	0
PgB03	3009907	3012892	PgB03_g155_t01	-	1875	4	aminopeptidase n			N	Y	Y	0	0.2	0	0	0
PgB03	3024095	3037014	PgB03_g156_t01	-	2342	9	hypothetical protein			N	N	Y	11.2	15.3	11	21.4	5.1
PgB03	3024095	3038022	PgB03_g156_t02	-	2131	9	hypothetical protein			N	N	N	12.3	16.8	12.1	22.2	5.6
PgB03	3024095	3038531	PgB03_g156_t03	-	2141	9	hypothetical protein			N	N	N	12.3	16.9	12.4	23.8	5.7
PgB03	3024095	3050285	PgB03_g156_t04	-	2036	9	hypothetical protein			N	Y	N	12.9	17.6	12.7	23.3	5.8
PgB03	3027641	3035660	PgB03_g156_t05	-	1975	7	hypothetical protein			N	N	N	10.4	14.2	11.5	21.3	5
PgB03	3027641	3038531	PgB03_g156_t06	-	1559	8	hypothetical protein			N	N	N	13.2	18.4	14.9	28	6.4
PgB03	3056655	3086142	PgB03_g157_t01	-	6342	24	Serine/threonine-protein kinase WNK1			N	N	N	22.5	21.7	19.1	38	12.6
PgB03	3056655	3086142	PgB03_g157_t02	-	7047	25	Serine/threonine-protein kinase WNK1			N	N	Y	21.8	20.2	17.3	37	12.1
PgB03	3056655	3086142	PgB03_g157_t03	-	6993	25	Serine/threonine-protein kinase WNK1			N	N	N	21.5	19.8	16.9	37.2	12
PgB03	3056655	3095731	PgB03_g157_t04	-	4894	27	Serine/threonine-protein kinase WNK1			N	Y	N	27.4	27.8	23.6	48.7	16.5
PgB03	3056655	3099860	PgB03_g157_t05	-	5667	26	Serine/threonine-protein kinase WNK1			N	N	N	25.1	24.9	22.1	43.7	14.7
PgB03	3056655	3099860	PgB03_g157_t06	-	6426	27	Serine/threonine-protein kinase WNK1			N	N	N	24.3	23.3	20.2	41.8	14.1
PgB03	3130752	3131081	PgB03_g158_t01	+	330	1	hypothetical protein			N	N	N	2.2	0	0	0	0
PgB03	3130752	3167396	PgB03_g158_t02	+	5806	21	Protein Malvolio			N	N	N	10.7	0	2	15.9	2
PgB03	3130752	3167396	PgB03_g158_t03	+	5140	20	Protein Malvolio			N	N	N	10.9	0	2.2	18	2.2
PgB03	3130752	3167396	PgB03_g158_t04	+	6451	21	Protein Malvolio			N	N	Y	9.9	0	1.8	14.4	1.8
PgB03	3145780	3147970	PgB03_g158_t05	+	960	2	hypothetical protein			N	N	N	10.4	0	0.3	0	0
PgB03	3148049	3152060	PgB03_g158_t06	+	4012	1	Craniofacial development protein 2			N	N	N	8	0	0.1	0.2	0.2
PgB03	3148049	3154544	PgB03_g158_t07	+	1753	6	Craniofacial development protein 2			N	N	N	10	0	0.3	0.2	0.1
PgB03	3150163	3167396	PgB03_g158_t08	+	3184	18	Protein Malvolio			N	N	N	10.8	0	3.4	28.9	3.5
PgB03	3153920	3167396	PgB03_g158_t09	+	2079	13	Protein Malvolio			N	N	N	12.1	0	5.2	44.6	5.4
PgB03	3154034	3167396	PgB03_g158_t10	+	2919	13	Protein Malvolio			N	N	N	9.7	0	3.8	32.3	3.9
PgB03	3155094	3155475	PgB03_g158_t11	+	382	1	hypothetical protein			N	N	N	4.7	0	0	0.1	0
PgB03	3155152	3159528	PgB03_g158_t12	+	625	5	Protein Malvolio			N	N	N	6.7	0	0.8	29.7	2.1
PgB03	3157780	3167396	PgB03_g158_t13	+	1559	10	Protein Malvolio			N	Y	N	13.6	0	6.4	46.5	6.1
PgB03	3168016	3173903	PgB03_g159_t01	-	2823	3	Sodium-coupled neutral amino acid transporter 10	SL		N	Y	Y	12.9	25.6	20.4	21	10.5
PgB03	3174127	3179617	PgB03_g160_t01	+	2551	7	Mediator of RNA polymerase II transcription subunit 18		Telo	N	N	Y	13	37.2	21	8.7	8.9
PgB03	3174599	3179617	PgB03_g160_t02	+	2213	7	Mediator of RNA polymerase II transcription subunit 18		Telo	N	Y	N	14.1	40.1	22.9	9.8	9.3
PgB03	3179412	3187853	PgB03_g161_t01	-	1568	10	choline kinase alpha	SL	Telo	N	Y	Y	6.2	52.2	34.7	2.5	8.5
PgB03	3202478	3207272	PgB03_g162_t01	-	962	7	origin recognition complex subunit 5			N	N	N	0.9	9	20.5	0	0
PgB03	3202478	3212110	PgB03_g162_t02	-	1441	10	origin recognition complex subunit 5	SL		N	Y	Y	1.1	12	23.5	0.6	0
PgB03	3202478	3212110	PgB03_g162_t03	-	1441	10	origin recognition complex subunit 5	SL		N	N	N	1.1	11.9	23.5	0.6	0
PgB03	3204128	3207208	PgB03_g162_t04	-	664	5	origin recognition complex subunit 5			N	N	N	0.7	10.7	20.2	0	0
PgB03	3213009	3221446	PgB03_g163_t01	-	2082	9	Tubulin alpha chain			N	N	N	145.3	120.2	110.7	27.1	23.3
PgB03	3213009	3222858	PgB03_g163_t02	-	3989	8	Tubulin alpha chain			N	Y	Y	73.4	47.4	47.9	13.1	11.7
PgB03	3213009	3229046	PgB03_g163_t03	-	2108	9	Tubulin alpha chain			N	N	N	168.1	189.9	154.1	29.3	24.4
PgB03	3230498	3249450	PgB03_g164_t01	+	4374	27	Cleavage and polyadenylation specificity factor subunit 1			N	Y	Y	13.1	25.6	22.8	5.4	2.6
PgB03	3251616	3260572	PgB03_g165_t01	-	3001	7	amine oxidase-like protein		Telo	N	N	N	6.2	3.9	4.3	0.2	0.2
PgB03	3251616	3261526	PgB03_g165_t02	-	2375	9	amine oxidase-like protein		Telo	N	Y	N	5.9	4.9	5.8	0.3	0.3
PgB03	3251616	3261526	PgB03_g165_t03	-	3127	8	amine oxidase-like protein		Telo	N	N	N	5.9	4	4	0.2	0.2
PgB03	3251616	3261526	PgB03_g165_t04	-	3295	8	amine oxidase-like protein		Telo	N	N	Y	5.6	3.8	3.9	0.2	0.2
PgB03	3285165	3291426	PgB03_g166_t01	+	2014	6	LINE-1 reverse transcriptase		Telo	Y	Y	N	28.3	0.2	1	0.1	0.2
PgB03	3285182	3291426	PgB03_g166_t02	+	2521	5	LINE-1 reverse transcriptase		Telo	Y	N	Y	22.5	0.2	0.8	0	0.2
PgB03	3295726	3296162	PgB03_g167_t01	.	437	1	hypothetical protein			Y	Y	Y	2.7	0	0	0	0
PgB03	3296392	3304768	PgB03_g168_t01	-	3777	4	LINE-1 reverse transcriptase		Telo	Y	N	Y	21	0.1	1.6	0.2	0.6
PgB03	3296392	3304783	PgB03_g168_t02	-	2302	5	LINE-1 reverse transcriptase		Telo	Y	N	N	32.5	0.2	2.2	0.3	0.9
PgB03	3296392	3304783	PgB03_g168_t03	-	2280	5	LINE-1 reverse transcriptase		Telo	Y	Y	N	32	0.2	2.2	0.3	0.9
PgB03	3307547	3313842	PgB03_g169_t01	-	895	5	hypothetical protein	SL		Y	N	Y	5	11.1	5.2	0	0
PgB03	3307547	3313974	PgB03_g169_t02	-	890	4	hypothetical protein	SL		Y	N	N	3.2	3.5	1.8	0	0
PgB03	3311485	3313974	PgB03_g169_t03	-	889	2	hypothetical protein	SL		Y	Y	N	4.8	17.6	6.1	1	0
PgB03	3308338	3308901	PgB03_g170_t01	.	564	1	hypothetical protein			Y	Y	Y	7.7	4	7.3	0	0.3
PgB03	3314582	3324613	PgB03_g171_t01	+	3046	6	protein-like protein 4			Y	Y	Y	2.2	0.5	2.4	0	0
PgB03	3316253	3324613	PgB03_g171_t02	+	1970	5	protein-like protein 4			Y	N	N	0.9	0.2	1.2	0	0
PgB03	3326691	3337845	PgB03_g172_t01	-	3455	6	hypothetical protein			Y	N	N	31.9	0	0.1	0.5	0.3
PgB03	3326691	3337845	PgB03_g172_t02	-	5440	5	hypothetical protein			Y	N	N	28.4	0	0.6	0.6	0.1
PgB03	3326691	3337955	PgB03_g172_t03	-	2190	7	hypothetical protein			Y	N	N	45.4	0.1	0.2	0.7	0.4
PgB03	3326691	3337995	PgB03_g172_t04	-	3316	6	hypothetical protein			Y	N	N	32.1	0.1	0.5	1	0.3
PgB03	3326691	3338450	PgB03_g172_t05	-	7131	4	hypothetical protein			Y	N	Y	22.9	0.1	0.6	0.7	0.1
PgB03	3326691	3338450	PgB03_g172_t06	-	1236	7	hypothetical protein			Y	Y	N	72.7	0.1	0.4	1	0.7
PgB03	3328003	3331366	PgB03_g172_t07	-	1379	2	hypothetical protein			Y	N	N	34.5	0	0.7	1.3	0.5
PgB03	3328003	3337955	PgB03_g172_t08	-	4491	4	hypothetical protein			Y	N	N	30.7	0	1	1	0.2
PgB03	3343467	3344046	PgB03_g173_t01	.	580	1	hypothetical protein			Y	Y	Y	6.2	0	0	2.2	0
PgB03	3344914	3349404	PgB03_g174_t01	+	657	5	hypothetical protein			Y	Y	Y	1.2	0.1	0	0	0
PgB04	1482	21076	PgB04_g001_t01	+	1525	8	SPARC	SL	Telo	N	Y	N	3.2	25.1	31.6	17.3	997.8
PgB04	1482	21076	PgB04_g001_t02	+	1525	8	SPARC	SL	Telo	N	N	N	3.2	25.1	31.6	17.3	997.8
PgB04	1482	21076	PgB04_g001_t03	+	1529	8	SPARC	SL	Telo	N	N	Y	3.2	25	31.6	17.3	995.1
PgB04	1482	21076	PgB04_g001_t04	+	1525	8	SPARC	SL	Telo	N	N	N	3.2	25.1	31.6	17.3	997.8
PgB04	24651	35839	PgB04_g002_t01	+	2730	9	DnaJ subfamily B member 12			N	Y	Y	13.8	16.1	14.8	21.6	12.3
PgB04	24651	35839	PgB04_g002_t02	+	2730	9	DnaJ subfamily B member 12			N	N	N	13.8	16.1	14.8	21.3	12.3
PgB04	24813	35839	PgB04_g002_t03	+	2568	10	DnaJ subfamily B member 12			N	N	N	14.7	17.2	15.7	22.7	13
PgB04	38160	44477	PgB04_g003_t01	+	1859	9	DnaJ subfamily C member 2			N	Y	Y	40.5	86.1	48.5	13.9	9.1
PgB04	38160	44477	PgB04_g003_t02	+	1859	10	DnaJ subfamily C member 2			N	N	N	40.5	86.1	48.5	13.9	9.1
PgB04	46135	46540	PgB04_g004_t01	.	406	1	hypothetical protein			N	Y	Y	0	0.5	2.7	0	0
PgB04	46617	49900	PgB04_g005_t01	+	738	5	Histone acetyltransferase MYST1			N	N	Y	26.4	71	42.9	16.7	6.6
PgB04	46617	50073	PgB04_g005_t02	+	735	5	Histone acetyltransferase MYST1			N	N	N	26.8	70.6	43	16.7	6.6
PgB04	46617	50073	PgB04_g005_t03	+	735	5	Histone acetyltransferase MYST1			N	N	N	26.8	70.6	43	16.7	6.6
PgB04	46627	49900	PgB04_g005_t04	+	728	5	Histone acetyltransferase MYST1			N	Y	N	26.7	72	43.4	16.9	6.7
PgB04	46629	50073	PgB04_g005_t05	+	723	4	Histone acetyltransferase MYST1			N	N	N	27.2	71.8	43.8	16.9	6.7
PgB04	50230	50336	PgB04_g006_t01	.	107	1	Histone acetyltransferase MYST1			N	Y	Y	8.3	15	17.3	0.5	1.7
PgB04	51012	52863	PgB04_g007_t01	+	415	3	Histone acetyltransferase MYST1			N	Y	N	28.8	55.3	53.2	19.6	3.8
PgB04	51012	53541	PgB04_g007_t02	+	867	3	Histone acetyltransferase MYST1			N	N	Y	18	40.9	35.1	14.1	3.3
PgB04	60247	68109	PgB04_g008_t01	+	1715	6	Leucine-rich repeat-containing protein 15			N	Y	Y	0.2	0.1	7.1	0.1	1.8
PgB04	73632	76210	PgB04_g009_t01	-	723	4	copine-8			N	Y	Y	1.7	12.2	7.3	6	0.7
PgB04	81419	85142	PgB04_g010_t01	+	887	6	General transcription factor 3C polypeptide 5			N	N	N	2.2	4.6	3.1	4.1	1.8
PgB04	81419	87901	PgB04_g010_t02	+	1265	10	General transcription factor 3C polypeptide 5			N	Y	Y	2.9	3.8	1.9	3.2	1.5
PgB04	89342	103134	PgB04_g011_t01	+	3015	18	PHD finger and CXXC domain-containing protein	SL		N	Y	Y	3.6	9.7	12.4	6.1	1.1
PgB04	90524	103134	PgB04_g011_t02	+	2717	16	PHD finger and CXXC domain-containing protein			N	N	N	3.5	8.8	10.6	5.6	0.7
PgB04	105958	111395	PgB04_g012_t01	+	1732	8	Phosphomannomutase	SL		N	Y	Y	15.4	71.5	16.8	16.9	16.9
PgB04	115930	128671	PgB04_g013_t01	-	1881	16	Monensin-resistant 2			N	N	N	8.2	18.7	14.8	10.6	6.1
PgB04	115930	147761	PgB04_g013_t02	-	5266	36	Monensin-resistant 2			N	N	N	11.6	29.9	20.8	20.6	12.3
PgB04	115930	147762	PgB04_g013_t03	-	5252	36	Monensin-resistant 2			N	N	N	11.6	30	20.9	20.7	12.4
PgB04	115930	147762	PgB04_g013_t04	-	5252	37	Monensin-resistant 2			N	N	N	11.6	30	20.9	20.7	12.4
PgB04	115930	147762	PgB04_g013_t05	-	5267	37	Monensin-resistant 2			N	Y	N	11.6	29.9	20.8	20.6	12.3
PgB04	115930	147762	PgB04_g013_t06	-	5267	37	Monensin-resistant 2			N	N	N	11.6	29.9	20.8	20.6	12.3
PgB04	115930	147935	PgB04_g013_t07	-	5431	36	Monensin-resistant 2			N	N	N	11.3	29.1	20.2	20	12
PgB04	115930	147935	PgB04_g013_t08	-	5425	37	Monensin-resistant 2			N	N	N	11.3	29.1	20.2	20	12
PgB04	115930	147935	PgB04_g013_t09	-	5431	37	Monensin-resistant 2			N	N	N	11.3	29.1	20.2	20	12
PgB04	115930	149673	PgB04_g013_t10	-	5454	38	Monensin-resistant 2			N	N	Y	11.2	29	20.1	19.9	11.9
PgB04	119468	147761	PgB04_g013_t11	-	4645	33	Monensin-resistant 2			N	N	N	12.7	33.1	21.4	22	13.5
PgB04	119468	147762	PgB04_g013_t12	-	4646	34	Monensin-resistant 2			N	N	N	12.7	33.1	21.4	22	13.5
PgB04	150163	163051	PgB04_g014_t01	-	2102	15	Suppressor of tumorigenicity 7 protein	SL		N	N	N	12.7	22.1	12	1.3	0.8
PgB04	150163	163304	PgB04_g014_t02	-	2342	15	Suppressor of tumorigenicity 7 protein	SL		N	N	Y	11.8	20.4	11.4	1.2	0.8
PgB04	150163	163304	PgB04_g014_t03	-	2339	15	Suppressor of tumorigenicity 7 protein	SL		N	N	N	11.8	20.4	11.4	1.2	0.8
PgB04	150163	165252	PgB04_g014_t04	-	2275	16	Suppressor of tumorigenicity 7 protein	SL		N	N	N	11.4	21	10.7	1.2	0.7
PgB04	150163	165252	PgB04_g014_t05	-	2271	16	Suppressor of tumorigenicity 7 protein	SL		N	Y	N	11.8	21.2	11.2	1.2	0.8
PgB04	165698	180143	PgB04_g015_t01	+	4490	21	Coatomer subunit gamma	SL		N	Y	N	34.6	46.9	25.6	22.6	14.8
PgB04	166274	180143	PgB04_g015_t02	+	5026	20	Coatomer subunit gamma	SL		N	N	Y	31.1	41.9	22.9	20.1	13.2
PgB04	180436	180998	PgB04_g016_t01	+	563	1	hypothetical protein		Telo	N	Y	Y	2.8	4.6	0	0	1
PgB04	182590	183467	PgB04_g017_t01	+	515	2	cre-ttr-52 protein			N	Y	Y	1.5	2.3	13.7	1.5	3.1
PgB04	197511	206145	PgB04_g018_t01	+	2266	12	bifunctional 3 -phosphoadenosine 5 -phosphosulfate synthase			N	Y	Y	11.8	44.2	21.5	14.6	9.3
PgB04	200904	206145	PgB04_g018_t02	+	1805	9	bifunctional 3 -phosphoadenosine 5 -phosphosulfate synthase			N	N	N	11.4	42.9	22.5	14.6	9.9
PgB04	208481	215434	PgB04_g019_t01	+	2219	7	Glyoxylate reductase/hydroxypyruvate reductase	SL	Telo	N	Y	N	108.1	29.3	18.8	6	4.3
PgB04	208481	215434	PgB04_g019_t02	+	2264	8	Glyoxylate reductase/hydroxypyruvate reductase	SL	Telo	N	N	Y	106.1	28.6	18.5	5.9	4.2
PgB04	208702	215434	PgB04_g019_t03	+	1902	5	Glyoxylate reductase/hydroxypyruvate reductase	SL	Telo	N	N	N	108	26	20.7	6.4	4.7
PgB04	216852	223495	PgB04_g020_t01	+	2517	7	Glyoxylate reductase/hydroxypyruvate reductase	SL		N	Y	N	9	4.5	14.9	117.4	24.1
PgB04	216871	223495	PgB04_g020_t02	+	3491	6	Glyoxylate reductase/hydroxypyruvate reductase	SL		N	N	Y	6.5	3.3	10.7	84.8	17.5
PgB04	224992	252368	PgB04_g021_t01	+	8401	11	Cleavage and polyadenylation specificity factor subunit 6	SL	Telo	N	N	Y	12.8	34.7	30.8	11.1	2.8
PgB04	224992	252911	PgB04_g021_t02	+	4532	11	Cleavage and polyadenylation specificity factor subunit 6	SL	Telo	N	N	N	20.6	61.6	53.8	18.8	4.9
PgB04	224992	263805	PgB04_g021_t03	+	5048	13	Cleavage and polyadenylation specificity factor subunit 6	SL	Telo	N	N	N	19.2	57.7	50	17.2	4.5
PgB04	224992	307659	PgB04_g021_t04	+	5845	24	Protein espinas	SL	Telo	N	N	N	19.3	56.7	44.7	15.2	4.6
PgB04	224992	307659	PgB04_g021_t05	+	6568	24	Protein espinas	SL	Telo	N	N	N	17.8	51.5	40	13.9	4.2
PgB04	224992	307659	PgB04_g021_t06	+	5913	25	Protein espinas	SL	Telo	N	N	N	19.3	56.9	44.4	15.4	4.6
PgB04	224992	307659	PgB04_g021_t07	+	6483	22	Protein espinas	SL	Telo	N	N	N	18	52.1	40.5	14.1	4.2
PgB04	224992	307659	PgB04_g021_t08	+	6483	22	Protein espinas	SL	Telo	N	N	N	18	52.1	40.5	14.1	4.2
PgB04	224993	249266	PgB04_g021_t09	+	4439	12	Cleavage and polyadenylation specificity factor subunit 6	SL	Telo	N	N	N	21.4	65	56.5	20.1	5.1
PgB04	224993	307659	PgB04_g021_t10	+	5916	23	Protein espinas	SL	Telo	N	N	N	19.3	56.8	44.4	15.3	4.6
PgB04	225013	247362	PgB04_g021_t11	+	4150	9	Cleavage and polyadenylation specificity factor subunit 6	SL	Telo	N	Y	N	22.2	68.1	60.1	20.1	5.2
PgB04	225013	247362	PgB04_g021_t12	+	4129	9	Cleavage and polyadenylation specificity factor subunit 6	SL	Telo	N	N	N	22.5	69.5	60.8	20.7	5.4
PgB04	264533	301023	PgB04_g021_t13	+	1527	8	prickle-like protein 2	SL		N	N	N	6.9	18	3.6	1.3	1.1
PgB04	264533	301023	PgB04_g021_t14	+	1527	7	prickle-like protein 2	SL		N	N	N	6.9	18	3.6	1.3	1.1
PgB04	270954	301023	PgB04_g021_t15	+	1521	7	prickle-like protein 2	SL		N	N	N	5.9	18	3.6	1.3	1
PgB04	256175	264016	PgB04_g022_t01	-	4337	5	hypothetical protein	SL		N	N	N	2.3	52.7	0.2	0	0
PgB04	256175	264016	PgB04_g022_t02	-	3977	5	hypothetical protein	SL		N	N	N	2.5	57.7	0.2	0.3	0
PgB04	256175	264016	PgB04_g022_t03	-	4523	6	hypothetical protein	SL		N	Y	Y	2.2	51.4	0.2	0.3	0
PgB04	256175	264033	PgB04_g022_t04	-	4273	6	hypothetical protein	SL		N	N	N	2.4	54.7	0.2	0.3	0
PgB04	256175	264190	PgB04_g022_t05	-	4523	7	hypothetical protein	SL		N	N	N	2.1	50.7	0.2	0.3	0
PgB04	313445	321897	PgB04_g023_t01	-	1123	7	Serpentine receptor class delta-19			N	Y	Y	1	3.5	9	0	0.2
PgB04	322570	332328	PgB04_g024_t01	-	3138	11	hypothetical protein	SL		N	N	Y	13.8	10.5	19.2	9.8	4.5
PgB04	324469	331284	PgB04_g024_t02	-	1463	9	hypothetical protein	SL		N	Y	N	24.1	20.4	35.4	19.4	8.8
PgB04	324469	332328	PgB04_g024_t03	-	2233	9	hypothetical protein	SL		N	N	N	17.4	13.1	22.7	13.2	5.6
PgB04	324619	331243	PgB04_g024_t04	-	1143	9	hypothetical protein	SL		N	N	N	32.9	29.4	54.2	24.7	11.7
PgB04	324619	325173	PgB04_g025_t01	.	555	1	hypothetical protein			N	Y	Y	11.8	19.6	39.3	3.2	7.7
PgB04	336134	347955	PgB04_g026_t01	+	3947	20	Round spermatid basic protein 1-like protein			N	Y	Y	5.9	11.6	7.2	4.2	1.2
PgB04	336295	343903	PgB04_g026_t02	+	2596	12	round spermatid basic protein 1-like protein			N	N	N	7.2	13.1	9.2	4.9	1.5
PgB04	336295	347955	PgB04_g026_t03	+	3786	20	Round spermatid basic protein 1-like protein			N	N	N	6.1	12.1	7.6	4.4	1.2
PgB04	338282	347955	PgB04_g026_t04	+	3193	15	round spermatid basic protein 1-like protein			N	N	N	5.1	9.2	4.5	2.8	1
PgB04	338775	347955	PgB04_g026_t05	+	3288	15	round spermatid basic protein 1-like protein			N	N	N	5	9.7	4.6	2.7	1
PgB04	351426	357245	PgB04_g027_t01	-	1936	9	26S proteasome non-ATPase regulatory subunit 6	SL		N	Y	Y	64.3	129.4	79.6	67.3	39.4
PgB04	357865	366727	PgB04_g028_t01	+	1730	13	E3 ubiquitin-protein ligase RFWD3			N	Y	N	1.4	2.9	5.1	2.8	0.7
PgB04	358366	366727	PgB04_g028_t02	+	1820	14	E3 ubiquitin-protein ligase RFWD3			N	N	Y	1.3	3	4.8	2.7	0.6
PgB04	359479	359993	PgB04_g028_t03	+	515	1	E3 ubiquitin-protein ligase RFWD3			N	N	N	0.4	3.7	2.6	0.8	0.6
PgB04	372417	376037	PgB04_g029_t01	-	978	5	hypothetical protein			N	Y	Y	0.1	4.4	2.1	0	0
PgB04	398641	405044	PgB04_g030_t01	-	1529	10	TBC1 domain family member 13	SL		N	Y	Y	3.1	10.2	5.1	3.6	1.8
PgB04	406838	416028	PgB04_g031_t01	+	2756	16	ATP-dependent RNA helicase DDX46	SL		N	N	N	4.3	4.5	6.5	8.3	0.8
PgB04	406838	416028	PgB04_g031_t02	+	2944	17	ATP-dependent RNA helicase DDX46	SL		N	Y	Y	4.2	4.8	7.7	8	0.8
PgB04	416990	422285	PgB04_g032_t01	+	1380	8	Paralyzed arrest at two-fold protein 6			N	Y	N	15.8	60.4	37.2	17.6	26.5
PgB04	416990	423283	PgB04_g032_t02	+	1842	8	Paralyzed arrest at two-fold protein 6			N	N	Y	11.8	46.2	28.6	14.1	20.6
PgB04	423882	429846	PgB04_g033_t01	-	1391	7	glutamyl-trna amidotransferase subunit			N	N	N	3.7	8	5.8	2.3	2.1
PgB04	423882	429846	PgB04_g033_t02	-	1391	7	glutamyl-trna amidotransferase subunit			N	N	N	3.7	8	5.8	2.3	2.1
PgB04	423882	430857	PgB04_g033_t03	-	1566	8	glutamyl-trna amidotransferase subunit			N	N	N	3.6	9.3	6.2	2	1.9
PgB04	423882	430857	PgB04_g033_t04	-	1566	8	glutamyl-trna amidotransferase subunit			N	N	N	3.6	9.3	6.2	2	1.9
PgB04	423882	430857	PgB04_g033_t05	-	1566	9	glutamyl-trna amidotransferase subunit			N	N	N	3.6	9.3	6.2	2	1.9
PgB04	423882	431148	PgB04_g033_t06	-	1857	9	glutamyl-trna amidotransferase subunit			N	Y	Y	3.1	7.8	6	1.7	1.6
PgB04	433079	442564	PgB04_g034_t01	+	2376	14	Transmembrane 9 superfamily member 3	SL		N	Y	Y	20.4	15.9	17	21.8	11.7
PgB04	444314	444857	PgB04_g035_t01	+	544	1	hypothetical protein			N	Y	Y	1.5	0	0	0	0
PgB04	448779	454739	PgB04_g036_t01	-	1589	5	erythroid transcription factor			N	N	N	0.9	3.8	14.7	14.9	2.2
PgB04	448779	457926	PgB04_g036_t02	-	1362	9	erythroid transcription factor	SL		N	Y	N	2.1	9.5	27.3	17.7	2.8
PgB04	448779	458436	PgB04_g036_t03	-	1872	8	erythroid transcription factor	SL		N	N	N	1.8	6.9	20.6	12.9	2.1
PgB04	448779	461233	PgB04_g036_t04	-	2971	9	erythroid transcription factor	SL		N	N	Y	1.2	4.5	12.9	8.8	1.3
PgB04	472351	478481	PgB04_g037_t01	-	1438	8	Intramembrane protease 2			N	Y	Y	5.4	7.9	8.5	9.4	2.3
PgB04	485438	494150	PgB04_g038_t01	+	2171	13	Endoplasmin			N	N	N	192.3	116.1	58.6	170.7	66.1
PgB04	485438	496486	PgB04_g038_t02	+	3344	15	Endoplasmin			N	Y	Y	138.9	88.5	46.6	124.2	48.4
PgB04	495813	496818	PgB04_g039_t01	-	886	2	hypothetical protein			N	Y	Y	22.3	27.7	16.1	10.9	7.4
PgB04	496878	506413	PgB04_g040_t01	+	1806	10	hypothetical protein			N	Y	N	8.4	20.7	7.5	8.3	3.7
PgB04	496977	506413	PgB04_g040_t02	+	1867	10	hypothetical protein			N	N	N	8.1	20	7.2	8.1	3.6
PgB04	497153	506413	PgB04_g040_t03	+	1785	10	hypothetical protein			N	N	N	8.5	20.9	7.6	8.4	3.7
PgB04	497251	506413	PgB04_g040_t04	+	1869	10	hypothetical protein			N	N	Y	7.8	19.9	7.2	8.3	3.5
PgB04	497570	506413	PgB04_g040_t05	+	1771	10	hypothetical protein			N	N	N	8.5	21.1	7.6	8.5	3.7
PgB04	500930	506413	PgB04_g040_t06	+	1514	7	hypothetical protein			N	N	N	7.9	19.7	6.2	7.4	3.6
PgB04	500930	506413	PgB04_g040_t07	+	1532	7	hypothetical protein			N	N	N	7.5	19.3	6.1	7.6	3.3
PgB04	506958	530015	PgB04_g041_t01	-	3761	12	sefir domain protein			N	Y	Y	2.5	18.1	9.5	0.8	2.4
PgB04	506958	532388	PgB04_g041_t02	-	2932	12	sefir domain protein			N	N	N	3	23.7	12.8	1.1	3.2
PgB04	506958	532600	PgB04_g041_t03	-	2881	13	sefir domain protein			N	N	N	3.1	24.7	13	1.1	3.4
PgB04	536927	605967	PgB04_g042_t01	+	15464	89	cytoplasmic dynein 2 heavy chain 1	SL		N	Y	Y	14.3	26.4	8.3	1	0.3
PgB04	545561	572520	PgB04_g042_t02	+	4604	27	cytoplasmic dynein 2 heavy chain 1			N	N	N	30.1	47.1	10.7	3.1	0.9
PgB04	545561	572520	PgB04_g042_t03	+	4394	28	cytoplasmic dynein 2 heavy chain 1			N	N	N	38.4	51.5	11.8	4.1	1.2
PgB04	554236	559227	PgB04_g042_t04	+	1707	7	cytoplasmic dynein 2 heavy chain 1			N	N	N	30.1	36.8	4.2	1.7	1
PgB04	554236	559227	PgB04_g042_t05	+	1718	7	cytoplasmic dynein 2 heavy chain 1			N	N	N	14.3	34.6	3.5	0.3	0.7
PgB04	554236	560236	PgB04_g042_t06	+	1683	9	cytoplasmic dynein 2 heavy chain 1			N	N	N	12.5	42.4	5.5	0.3	0.7
PgB04	579227	583262	PgB04_g042_t07	+	1001	7	cytoplasmic dynein 2 heavy chain 1			N	N	N	5.9	4.2	4.8	0	0.1
PgB04	584268	603354	PgB04_g042_t08	+	4934	31	cytoplasmic dynein 2 heavy chain 1			N	N	N	7.8	6.8	3.8	0.2	0.2
PgB04	562678	569218	PgB04_g043_t01	+	6541	1	Pao retrotransposon peptidase family protein			N	Y	Y	20.7	5.1	12.2	4.2	2.1
PgB04	563358	569218	PgB04_g043_t02	+	3953	2	hypothetical protein			N	N	N	148.7	40.2	88.5	51.3	13.4
PgB04	604714	616813	PgB04_g044_t01	-	1939	20	ABC transporter ATP-binding protein/permease wht-1		Telo	N	N	N	131.4	2.4	0.8	3.1	1.6
PgB04	604958	616800	PgB04_g044_t02	-	2761	18	ABC transporter ATP-binding protein/permease wht-1		Telo	N	N	N	97.6	3	1	2.2	1.1
PgB04	604958	616809	PgB04_g044_t03	-	2842	19	ABC transporter ATP-binding protein/permease wht-1		Telo	N	N	N	102.6	2.7	0.9	2.1	1.2
PgB04	604958	616813	PgB04_g044_t04	-	3476	18	ABC transporter ATP-binding protein/permease wht-1		Telo	N	N	N	83.3	2.2	0.8	1.7	1
PgB04	604958	616813	PgB04_g044_t05	-	2804	19	ABC transporter ATP-binding protein/permease wht-1		Telo	N	N	N	102.6	2.8	1	2.2	1.2
PgB04	604958	616813	PgB04_g044_t06	-	3518	18	ABC transporter ATP-binding protein/permease wht-1		Telo	N	Y	Y	79	1.8	0.5	1.7	0.9
PgB04	610735	614983	PgB04_g044_t07	-	347	5	ABC transporter ATP-binding protein/permease wht-1			N	N	N	94	0.2	3.6	3.6	1.8
PgB04	617706	625960	PgB04_g045_t01	+	2071	7	Serine/threonine-protein kinase			N	N	Y	57.2	1.1	3.1	10.9	3.1
PgB04	617706	625960	PgB04_g045_t02	+	2071	7	Serine/threonine-protein kinase			N	Y	N	59.3	0.7	2.4	10.6	3
PgB04	617706	627625	PgB04_g045_t03	+	1311	8	Serine/threonine-protein kinase			N	N	N	86.1	2.9	4.8	16.7	4.9
PgB04	622371	630723	PgB04_g046_t01	-	1476	9	gnat family protein			N	Y	N	8.7	13.8	4.2	2.2	2.1
PgB04	622371	631776	PgB04_g046_t02	-	2037	9	gnat family protein			N	N	N	14.7	10.4	5.9	3	1.8
PgB04	622371	631776	PgB04_g046_t03	-	2037	9	gnat family protein			N	N	N	14.9	10.4	5.9	3	1.8
PgB04	624592	631758	PgB04_g046_t04	-	2521	7	gnat family protein			N	N	Y	7.6	6.3	3	1.2	0.8
PgB04	627048	631758	PgB04_g046_t05	-	1740	5	gnat family protein			N	N	N	3.2	5.8	3.3	1	0.6
PgB04	634217	637942	PgB04_g047_t01	-	1803	5	Uncharacterized protein R08C7.12	SL		N	Y	Y	1	16.5	8.1	16.4	1.6
PgB04	634217	637942	PgB04_g047_t02	-	1779	5	Uncharacterized protein R08C7.12	SL		N	N	N	0.9	16.1	7.4	16.1	1.5
PgB04	651166	678645	PgB04_g048_t01	-	4205	26	helicase arip4	SL		N	N	N	5.5	16.6	11.6	4.4	2
PgB04	651166	678645	PgB04_g048_t02	-	4363	27	helicase arip4	SL		N	N	N	5.3	16	11.1	4.2	1.9
PgB04	651166	678645	PgB04_g048_t03	-	4399	27	helicase arip4	SL		N	N	Y	5.3	15.9	11	4.2	1.9
PgB04	651166	678645	PgB04_g048_t04	-	4169	26	helicase arip4	SL		N	N	N	5.6	16.8	11.7	4.4	2
PgB04	652511	678645	PgB04_g048_t05	-	3739	26	helicase arip4	SL		N	Y	N	6.2	18.6	13	4.5	1.3
PgB04	656028	678645	PgB04_g048_t06	-	3713	24	helicase arip4			N	N	N	6.2	18.8	12.7	4.1	1.1
PgB04	684087	686557	PgB04_g049_t01	-	1042	4	Golgin subfamily A member 7			N	Y	Y	3.3	11	19.6	9.9	4.6
PgB04	689002	706761	PgB04_g050_t01	+	3958	16	Succinyl-CoA ligase GDP-forming subunit beta	SL	Telo	N	N	N	269.9	15.4	14.3	9.6	4.5
PgB04	689002	706761	PgB04_g050_t02	+	3958	16	Succinyl-CoA ligase GDP-forming subunit beta	SL	Telo	N	N	N	269.9	15.4	14.3	9.6	4.5
PgB04	689002	706761	PgB04_g050_t03	+	3958	17	Succinyl-CoA ligase GDP-forming subunit beta	SL	Telo	N	N	N	269.9	15.4	14.3	9.6	4.5
PgB04	689152	699446	PgB04_g050_t04	+	1413	14	Succinyl-CoA ligase GDP-forming subunit beta	SL	Telo	N	Y	N	731.9	35.9	30.4	25.3	10.5
PgB04	689255	706761	PgB04_g050_t05	+	7076	15	Succinyl-CoA ligase GDP-forming subunit beta	SL	Telo	N	N	Y	156	8.7	8.1	5.3	2.6
PgB04	689255	706761	PgB04_g050_t06	+	7076	16	Succinyl-CoA ligase GDP-forming subunit beta	SL	Telo	N	N	N	156	8.7	8.1	5.3	2.6
PgB04	689255	706761	PgB04_g050_t07	+	7076	15	Succinyl-CoA ligase GDP-forming subunit beta	SL	Telo	N	N	N	156	8.7	8.1	5.3	2.6
PgB04	689957	699446	PgB04_g050_t08	+	3831	13	Succinyl-CoA ligase GDP-forming subunit beta	SL		N	N	N	277.4	13.6	11.5	9.3	4.1
PgB04	701119	702182	PgB04_g050_t09	+	294	2	hypothetical protein			N	N	N	0.1	3.3	0	0	0.6
PgB04	706611	711922	PgB04_g051_t01	-	1710	8	proteasome subunit beta type-6	SL		N	N	Y	60.6	99.4	36.8	22.3	20.5
PgB04	706611	712639	PgB04_g051_t02	-	1669	9	proteasome subunit beta type-6	SL		N	Y	N	62.2	101.8	37.8	22.9	21
PgB04	715201	718705	PgB04_g052_t01	+	1672	4	DNA-binding protein HEXBP		Telo	N	Y	Y	237.5	40.4	90.9	62.1	27.4
PgB04	718902	720912	PgB04_g053_t01	-	677	4	RNA exonuclease 4			N	N	N	9.9	26.3	13.9	4.6	3.5
PgB04	718902	721648	PgB04_g053_t02	-	951	6	RNA exonuclease 4			N	N	N	10.7	32.2	15.3	5.3	2.9
PgB04	718902	722135	PgB04_g053_t03	-	1348	6	RNA exonuclease 4			N	Y	Y	7.7	24.9	10.8	5.4	2.4
PgB04	720279	729016	PgB04_g054_t01	+	1390	10	Pre-mRNA-splicing factor 18	SL	Telo	N	N	N	20	88.9	35.3	18.1	10.3
PgB04	720279	729016	PgB04_g054_t02	+	1390	10	Pre-mRNA-splicing factor 18	SL	Telo	N	Y	N	20	88.9	35.3	18.1	10.3
PgB04	720279	729016	PgB04_g054_t03	+	1390	11	Pre-mRNA-splicing factor 18	SL	Telo	N	N	N	20	88.9	35.3	18.1	10.3
PgB04	723500	729016	PgB04_g054_t04	+	1582	8	Pre-mRNA-splicing factor 18	SL		N	N	Y	17.5	78.2	32.2	15.2	8.6
PgB04	723500	729016	PgB04_g054_t05	+	1582	8	Pre-mRNA-splicing factor 18	SL		N	N	N	17.5	78.2	32.2	15.2	8.6
PgB04	731436	738762	PgB04_g055_t01	+	1278	7	Geranylgeranyl pyrophosphate synthase			N	N	Y	12.8	23.9	25.2	10.4	6.7
PgB04	731436	738762	PgB04_g055_t02	+	1278	7	Geranylgeranyl pyrophosphate synthase			N	N	N	12.8	23.9	25.2	10.4	6.7
PgB04	731436	738762	PgB04_g055_t03	+	1278	8	Geranylgeranyl pyrophosphate synthase			N	N	N	12.8	23.9	25.2	10.4	6.7
PgB04	731436	738762	PgB04_g055_t04	+	1278	8	Geranylgeranyl pyrophosphate synthase			N	N	N	12.8	23.9	25.2	10.4	6.7
PgB04	731436	742421	PgB04_g055_t05	+	1161	9	Geranylgeranyl pyrophosphate synthase			N	Y	N	13.9	26.2	27.8	12.3	7.4
PgB04	739751	744208	PgB04_g056_t01	-	1935	8	Quinone oxidoreductase-like protein 2			N	N	Y	9.1	24.2	13.4	6.6	4.9
PgB04	739751	744817	PgB04_g056_t02	-	1826	8	Quinone oxidoreductase-like protein 2			N	Y	N	9.3	25.4	14.2	7.2	5.2
PgB04	744500	752359	PgB04_g057_t01	+	1838	10	Interferon-related developmental regulator 1	SL		N	Y	N	7.3	15.9	14	4.6	2.4
PgB04	745870	752359	PgB04_g057_t02	+	1704	10	Interferon-related developmental regulator 1	SL		N	N	N	8	16.9	14.2	4.9	2.6
PgB04	745870	752359	PgB04_g057_t03	+	2039	9	Interferon-related developmental regulator 1	SL		N	N	Y	6.9	15.9	13.9	4.3	2.3
PgB04	751256	757061	PgB04_g058_t01	-	2304	8	Cytoplasmic tRNA 2-thiolation protein 1			N	Y	Y	4.2	12.2	11.8	6.6	1.9
PgB04	751256	757900	PgB04_g058_t02	-	2236	9	Cytoplasmic tRNA 2-thiolation protein 1			N	N	N	5	14.1	12.9	7.2	2.3
PgB04	751256	757900	PgB04_g058_t03	-	2236	9	Cytoplasmic tRNA 2-thiolation protein 1			N	N	N	5	14.1	12.9	7.2	2.3
PgB04	751256	757900	PgB04_g058_t04	-	2237	10	Cytoplasmic tRNA 2-thiolation protein 1			N	N	N	5	14.1	12.9	7.2	2.3
PgB04	751256	758292	PgB04_g058_t05	-	1998	10	Cytoplasmic tRNA 2-thiolation protein 1			N	N	N	5.6	16	13.9	7.9	2.6
PgB04	751256	758292	PgB04_g058_t06	-	1998	10	Cytoplasmic tRNA 2-thiolation protein 1			N	N	N	5.1	14	11.2	7.7	2.4
PgB04	752683	758254	PgB04_g058_t07	-	1053	9	Cytoplasmic tRNA 2-thiolation protein 1			N	N	N	7.4	20.4	16.6	13.3	3.1
PgB04	759469	762257	PgB04_g059_t01	+	404	3	stam-binding a	SL		N	N	N	7.5	3.9	9.1	1.3	0.9
PgB04	759469	770301	PgB04_g059_t02	+	1668	9	stam-binding a	SL		N	Y	Y	9.1	17.2	4.7	7.3	3
PgB04	759469	770301	PgB04_g059_t03	+	1668	9	stam-binding a	SL		N	N	N	9.1	17.2	4.7	7.3	3
PgB04	761080	763993	PgB04_g059_t04	+	490	4	STAM-binding protein-like protein A	SL		N	N	N	11.8	25.3	8.9	6.7	5.7
PgB04	779639	798995	PgB04_g060_t01	+	2612	20	LIM domain and actin-binding protein 1			N	Y	N	0.5	27.7	14.8	0.4	36.7
PgB04	779639	801121	PgB04_g060_t02	+	2934	21	LIM domain and actin-binding protein 1			N	N	N	0.4	25.9	16.7	0.1	29.9
PgB04	779675	801121	PgB04_g060_t03	+	2961	22	LIM domain and actin-binding protein 1			N	N	Y	0.4	25.4	16.7	0.1	29
PgB04	803107	805228	PgB04_g061_t01	-	652	3	hypothetical protein			N	Y	Y	0.4	2.3	2.3	0	0
PgB04	809339	840243	PgB04_g062_t01	+	6558	34	NEDD8	SL		N	N	Y	30.8	33.5	19.2	27.2	8.1
PgB04	809339	840243	PgB04_g062_t02	+	6431	35	NEDD8	SL		N	N	N	31.3	34	19.5	28.2	8.3
PgB04	809339	840243	PgB04_g062_t03	+	6398	35	NEDD8	SL		N	N	N	31.3	34.1	19.6	27.9	8.3
PgB04	809339	840243	PgB04_g062_t04	+	6398	34	NEDD8	SL		N	N	N	31.4	34.1	19.6	27.9	8.3
PgB04	809722	840243	PgB04_g062_t05	+	6015	35	NEDD8	SL		N	N	N	33	36.3	20.8	29.7	8.8
PgB04	809722	840243	PgB04_g062_t06	+	6048	35	NEDD8	SL		N	N	N	33	36.2	20.7	29.9	8.7
PgB04	809722	840243	PgB04_g062_t07	+	6015	35	NEDD8	SL		N	N	N	33.1	36.3	20.8	29.7	8.8
PgB04	809722	840243	PgB04_g062_t08	+	6048	35	NEDD8	SL		N	N	N	32.9	36.2	20.6	29.9	8.7
PgB04	810351	840243	PgB04_g062_t09	+	5386	34	NEDD8	SL		N	Y	N	36.4	40.6	23.2	33.2	9.8
PgB04	810382	840243	PgB04_g062_t10	+	5388	34	NEDD8	SL		N	N	N	36.4	40.6	23.2	33.6	9.8
PgB04	810394	840243	PgB04_g062_t11	+	5376	36	NEDD8	SL		N	N	N	36.3	40.7	23.2	33.6	9.8
PgB04	823167	840243	PgB04_g062_t12	+	3624	22	NEDD8			N	N	N	24.1	27.4	11.5	24.6	6.4
PgB04	840681	843029	PgB04_g063_t01	+	302	4	glutathione s-transferase kappa 1	SL		N	N	N	2.7	22.7	0	0	4.9
PgB04	840681	854758	PgB04_g063_t02	+	3092	12	glutathione s-transferase kappa 1	SL		N	N	Y	4.6	18.7	3.9	9.8	5.4
PgB04	840681	854758	PgB04_g063_t03	+	3092	12	glutathione s-transferase kappa 1	SL		N	Y	N	3.8	17.1	3.4	9.3	4.8
PgB04	842430	854758	PgB04_g063_t04	+	2707	11	glutathione s-transferase kappa 1	SL		N	N	N	5.1	19	4.5	11.2	5.7
PgB04	844649	854758	PgB04_g063_t05	+	2426	9	glutathione s-transferase kappa 1	SL		N	N	N	4.9	16.3	4.1	12.1	5.2
PgB04	844649	854758	PgB04_g063_t06	+	2638	8	glutathione s-transferase kappa 1	SL		N	N	N	4.5	15	3.8	11.1	4.8
PgB04	847252	854758	PgB04_g063_t07	+	2518	5	hypothetical protein	SL		N	N	N	4.1	11.7	3.1	11.3	3.8
PgB04	847252	854758	PgB04_g063_t08	+	2144	6	hypothetical protein	SL		N	N	N	4.4	13.7	3.7	13.2	4.4
PgB04	847252	854758	PgB04_g063_t09	+	2144	6	hypothetical protein	SL		N	N	N	3.3	11.9	2.9	12.4	3.6
PgB04	848456	854758	PgB04_g063_t10	+	2019	5	hypothetical protein	SL		N	N	N	3.6	11.7	1.9	13.2	3.9
PgB04	852360	857683	PgB04_g064_t01	-	3299	4	Cell cycle control protein 50A			N	Y	Y	2.8	1.6	1.1	0.9	0.9
PgB04	852360	857683	PgB04_g064_t02	-	3228	4	Cell cycle control protein 50A			N	N	N	2.9	1.7	1.1	0.9	0.9
PgB04	852360	857683	PgB04_g064_t03	-	1967	4	hypothetical protein			N	N	N	2.4	2.7	1.9	1.5	1.3
PgB04	861058	863889	PgB04_g065_t01	-	1138	6	Cuticle collagen 19			N	Y	Y	0.3	2.6	10.5	0	0
PgB04	862174	862695	PgB04_g065_t02	-	324	2	Cuticle collagen 19			N	N	N	0.5	1.1	11.7	0	0
PgB04	867706	870015	PgB04_g066_t01	+	665	4	40S ribosomal protein S25		Telo	N	Y	Y	202.8	458.4	140.9	210	162.3
PgB04	873703	878822	PgB04_g067_t01	+	1203	9	Innexin-7	SL		N	N	N	13.6	46.7	27.9	28.7	14.8
PgB04	873703	882749	PgB04_g067_t02	+	2499	11	Innexin-7	SL		N	N	Y	9.5	30.8	21.8	18.6	9.6
PgB04	873703	884508	PgB04_g067_t03	+	1871	12	Innexin-7	SL		N	Y	N	12.1	37.6	28.2	24.5	12.4
PgB04	873705	886226	PgB04_g067_t04	+	1706	13	Innexin-7	SL		N	N	N	12.6	40.9	29.4	26.4	13.5
PgB04	895942	897429	PgB04_g068_t01	.	1488	1	hypothetical protein			N	Y	Y	5.7	2.4	6.1	2.9	0.4
PgB04	900165	900551	PgB04_g069_t01	+	387	1	hypothetical protein			N	Y	Y	0.6	0.5	3.5	0	0
PgB04	900612	902926	PgB04_g070_t01	.	2315	1	hypothetical protein			N	Y	Y	3.4	3	2.5	1.3	0.1
PgB04	910271	921784	PgB04_g071_t01	-	2829	16	Cytosolic non-specific dipeptidase			N	N	N	21.3	32.7	35.6	249.4	61.7
PgB04	910271	921785	PgB04_g071_t02	-	2075	16	Cytosolic non-specific dipeptidase			N	N	N	27.4	40	44.3	322.1	74.5
PgB04	910271	922525	PgB04_g071_t03	-	2177	16	Cytosolic non-specific dipeptidase	SL		N	Y	N	28.2	42.6	46.9	326	76.8
PgB04	914847	921785	PgB04_g071_t04	-	2564	10	Cytosolic non-specific dipeptidase			N	N	N	23.5	35.7	39.3	275.4	66.6
PgB04	914847	922525	PgB04_g071_t05	-	2666	11	Cytosolic non-specific dipeptidase	SL		N	N	N	24.3	38	41.6	280.3	68.8
PgB04	914847	922660	PgB04_g071_t06	-	2920	11	Cytosolic non-specific dipeptidase	SL		N	N	Y	22.2	34.4	37.2	255.5	62.4
PgB04	914847	923698	PgB04_g071_t07	-	2691	12	Cytosolic non-specific dipeptidase	SL		N	N	N	24.1	37.6	41.2	277.9	68.1
PgB04	926945	933529	PgB04_g072_t01	-	1352	10	Cytosolic non-specific dipeptidase			N	Y	N	3.2	13.5	11.6	53.2	21.2
PgB04	926945	934469	PgB04_g072_t02	-	1504	11	Cytosolic non-specific dipeptidase	SL		N	N	Y	3.4	15.1	13.8	56	20.7
PgB04	926945	934858	PgB04_g072_t03	-	1454	11	Cytosolic non-specific dipeptidase	SL		N	N	N	3.2	14.7	14.3	56.3	21.2
PgB04	938967	966334	PgB04_g073_t01	+	3122	25	PDZ domain-containing protein 8			N	N	N	12.3	32.1	14.6	25.7	11.5
PgB04	938967	972217	PgB04_g073_t02	+	4200	30	PDZ domain-containing protein 8			N	N	N	10.7	27.4	13.1	21.4	10.1
PgB04	938967	972217	PgB04_g073_t03	+	4200	30	PDZ domain-containing protein 8			N	N	N	10.7	27.4	13.1	21.4	10.1
PgB04	938967	972217	PgB04_g073_t04	+	4200	30	PDZ domain-containing protein 8			N	N	N	10.7	27.4	13.1	21.4	10.1
PgB04	938967	972217	PgB04_g073_t05	+	4200	30	PDZ domain-containing protein 8			N	N	N	10.7	27.4	13.1	21.4	10.1
PgB04	938967	972217	PgB04_g073_t06	+	4200	31	PDZ domain-containing protein 8			N	Y	N	10.7	27.4	13.1	21.4	10.1
PgB04	938967	972217	PgB04_g073_t07	+	4200	31	PDZ domain-containing protein 8			N	N	N	10.7	27.4	13.1	21.4	10.1
PgB04	938967	972217	PgB04_g073_t08	+	4200	32	PDZ domain-containing protein 8			N	N	N	10.7	27.4	13.1	21.4	10.1
PgB04	938969	972217	PgB04_g073_t09	+	4198	32	PDZ domain-containing protein 8			N	N	N	10.7	27.4	13.2	21.4	10.1
PgB04	939907	972217	PgB04_g073_t10	+	4372	30	PDZ domain-containing protein 8			N	N	Y	10.3	26.3	12.6	20.6	9.7
PgB04	939991	972217	PgB04_g073_t11	+	4288	30	PDZ domain-containing protein 8			N	N	N	10.5	26.8	12.8	21	9.9
PgB04	940824	972217	PgB04_g073_t12	+	4157	30	PDZ domain-containing protein 8			N	N	N	10.8	27.6	13.1	21.4	10.2
PgB04	940824	972217	PgB04_g073_t13	+	4157	30	PDZ domain-containing protein 8			N	N	N	10.8	27.7	13.1	21.4	10.2
PgB04	940824	972217	PgB04_g073_t14	+	4157	31	PDZ domain-containing protein 8			N	N	N	10.8	27.6	13.1	21.4	10.2
PgB04	940833	972217	PgB04_g073_t15	+	4148	29	PDZ domain-containing protein 8			N	N	N	10.9	27.7	13.1	21.4	10.2
PgB04	1004542	1004847	PgB04_g074_t01	+	306	1	hypothetical protein			N	Y	Y	22.3	2	3	6.9	0
PgB04	1014809	1029644	PgB04_g075_t01	+	9106	9	hypothetical protein			N	N	Y	50.7	0.4	1.1	1.2	0.3
PgB04	1014809	1029644	PgB04_g075_t02	+	8391	10	hypothetical protein			N	N	N	54	0.5	1.3	1.5	0.3
PgB04	1014809	1053202	PgB04_g075_t03	+	2876	2	hypothetical protein		Telo	N	N	N	68.6	0.1	1.1	2.2	0.1
PgB04	1014809	1058837	PgB04_g075_t04	+	5309	7	hypothetical protein		Telo	N	N	N	68.4	21.3	5.2	1.9	0.8
PgB04	1014809	1058837	PgB04_g075_t05	+	4763	7	hypothetical protein		Telo	N	N	N	69.6	23.7	5.8	2.2	0.9
PgB04	1014809	1058837	PgB04_g075_t06	+	3829	8	hypothetical protein		Telo	N	N	N	80.9	29.5	6.5	2.6	1.1
PgB04	1014809	1058837	PgB04_g075_t07	+	4375	8	hypothetical protein		Telo	N	N	N	70.7	25.8	6.2	2	1
PgB04	1014809	1058837	PgB04_g075_t08	+	3441	9	hypothetical protein		Telo	N	N	N	84	32.8	7.2	2.3	1.2
PgB04	1014809	1058837	PgB04_g075_t09	+	6005	6	hypothetical protein		Telo	N	N	N	56.6	18.8	4.6	1.8	0.7
PgB04	1017241	1029644	PgB04_g075_t10	+	5721	10	hypothetical protein			N	N	N	47.9	0.5	0.8	1.2	0.2
PgB04	1018181	1056098	PgB04_g075_t11	+	1331	4	hypothetical protein		Telo	N	N	N	122.3	1.1	0.9	1.4	0.3
PgB04	1021068	1024939	PgB04_g075_t12	+	1497	4	hypothetical protein			N	N	N	49.2	0.4	1.6	1.4	0.3
[truncated: 38,488 more rows]
