# Supplementary material for: Comparative genome analysis of programmed DNA elimination in nematodes
Source: HighWire-hosted journal article supplement (doi:10.1101/gr.225730.117), 2017-11-08
Supplement: Supplemental_Table_S6.xlsx [file Supplemental_Table_S6.xlsx]

## Sheet: Ascaris_X_genes_in_Celegans
Ascaris_transcripts	chromosome	Start	End	Strand	C. elegans_transcripts	chromosomes	Start	End	Strand	Annotation
AgB08X_g005_t02	AgB08X	22724	37815	-	F59A6.6a	chrII	4995551	4996442	+	rnase h family member (rnh-)
AgB08X_g008_t01	AgB08X	61030	72015	-	T27F7.1	chrII	4994039	4995607	+	Charged multivesicular body protein 3
AgB08X_g009_t02	AgB08X	74684	96625	-	B0491.1	chrII	11348430	11349946	+	GPI mannosyltransferase 1
AgB08X_g010_t05	AgB08X	99116	106741	-	C18H9.8	chrII	6679545	6682971	+	Intraflagellar transport protein 74
AgB08X_g012_t03	AgB08X	127284	134191	+	ZK546.17	chrII	4938599	4941150	-	MMACHC-like protein
AgB08X_g015_t01	AgB08X	171122	182365	-	Y48C3A.4	chrII	13279780	13285829	-	zinc c2h2 type family protein
AgB08X_g016_t01	AgB08X	239845	262026	+	F45H11.4a	chrI	10384219	10391388	-	metabotropic glutamate receptor 5
AgB08X_g017_t02	AgB08X	269389	273079	-	F45H11.6	chrI	10382746	10384222	-	transcription factor
AgB08X_g020_t03	AgB08X	295742	305769	-	Y95B8A.1	chrI	942257	947710	+	Zinc metalloproteinase nas-30
AgB08X_g022_t02	AgB08X	351609	352155	+	R05D7.4	chrI	12181046	12183297	-	Abhydrolase domain-containing protein 11
AgB08X_g027_t06	AgB08X	410957	426860	+	Y39B6A.43a	chrV	18961064	18967823	-	hypothetical protein
AgB08X_g030_t01	AgB08X	444780	456255	+	T02C12.3	chrIII	4022166	4025658	+	general transcription factor 3c polypeptide 5
AgB08X_g032_t02	AgB08X	503494	513015	+	E04D5.2	chrII	10419230	10422026	-	FMRFamide receptor, partial
AgB08X_g033_t07	AgB08X	517054	522094	+	R06F6.9	chrII	10821015	10822443	+	Peroxisomal 3,2-trans-enoyl-CoA isomerase
AgB08X_g034_t05	AgB08X	522582	531926	-	R06F6.12	chrII	10822328	10824081	-	Uncharacterized protein R06F6.12
AgB08X_g037_t03	AgB08X	553956	560749	-	C15F1.7a	chrII	6972712	6973892	-	superoxide dismutase
AgB08X_g039_t04	AgB08X	566267	571459	+	R06A4.9a	chrII	14358366	14361701	+	WD repeat-containing protein 33
AgB08X_g040_t01	AgB08X	585065	588842	-	Y48C3A.10	chrII	13338281	13339961	+	50s ribosomal protein l20
AgB08X_g043_t02	AgB08X	601820	606774	-	C05D12.1	chrII	11412232	11415820	-	Ferric-chelate reductase 1
AgB08X_g045_t02	AgB08X	616291	627387	-	C29F5.1	chrII	6303424	6306283	+	hypothetical protein
AgB08X_g046_t01	AgB08X	648808	660694	+	C29F5.4	chrII	6292652	6294356	-	hypothetical protein
AgB08X_g047_t02	AgB08X	667798	675422	+	T13C2.7	chrII	6779464	6781686	+	Cytochrome P450
AgB08X_g048_t01	AgB08X	673204	687006	-	ZK177.5	chrII	5503966	5506115	+	putative cytochrome p450 cyp44
AgB08X_g052_t01	AgB08X	719204	728497	-	F02E9.9a	chrI	8429931	8432980	-	Dipeptidyl peptidase 3, partial
AgB08X_g053_t01	AgB08X	730934	739005	+	C14A4.6	chrII	10593529	10594776	-	hypothetical protein
AgB08X_g054_t04	AgB08X	757116	761199	+	Y46G5A.29	chrII	12856200	12862058	+	hypothetical protein
AgB08X_g056_t02	AgB08X	793786	808094	-	F37B12.1	chrII	9026968	9029263	-	hypothetical protein
AgB08X_g058_t02	AgB08X	824707	867022	+	Y46G5A.1a	chrII	12694412	12725483	+	USP6-like protein
AgB08X_g059_t01	AgB08X	867114	870350	-	F21A3.6	chrV	15543161	15544994	-	g in family member (glb-14)
AgB08X_g071_t02	AgB08X	971074	980213	-	Y73E7A.9a	chrI	1610390	1620080	+	WD and tetratricopeptide repeats protein 1
AgB08X_g072_t03	AgB08X	985240	999466	+	Y92H12A.1a	chrI	1577400	1580069	+	Tyrosine-protein kinase Fyn
AgB08X_g076_t01	AgB08X	1023544	1043091	+	F27D4.1	chrI	7702429	7704584	+	putative electron transfer flavoprotein subunit
AgB08X_g077_t05	AgB08X	1052723	1060883	+	C41G7.9a	chrI	9515002	9516776	-	mbr family protein
AgB08X_g078_t03	AgB08X	1059977	1081382	-	F14B4.2a	chrI	9271480	9273794	-	hexokinase-2
AgB08X_g079_t01	AgB08X	1092989	1109365	-	R06A10.4	chrI	1089666	1095796	-	Serine/threonine-protein kinase H1
AgB08X_g083_t01	AgB08X	1158750	1172621	+	ZC434.9a	chrI	10356253	10360890	+	Carboxypeptidase A2
AgB08X_g085_t04	AgB08X	1196798	1211444	+	ZK484.2a	chrI	6081782	6085023	+	atp-binding cassette sub-family b member 9
AgB08X_g087_t02	AgB08X	1230597	1240531	+	Y48G1C.10a	chrI	89480	90957	+	Myotubularin-related protein 10-B
AgB08X_g089_t01	AgB08X	1246977	1259348	+	K07A12.4a	chrI	8687638	8690929	-	hbs1-like protein
AgB08X_g092_t06	AgB08X	1305827	1317762	-	Y47G6A.19a	chrI	3523313	3529956	-	Carboxypeptidase B
AgB08X_g093_t03	AgB08X	1326379	1340276	+	D1037.1	chrI	3684783	3690192	+	Protein SON
AgB08X_g094_t07	AgB08X	1342513	1361050	+	R119.5a	chrI	388470	394415	-	Protein-L-isoaspartate O-methyltransferase domain-containing protein 1
AgB08X_g095_t02	AgB08X	1357165	1392453	-	C09H6.2a	chrI	8109746	8119314	-	Protein lin-10
AgB08X_g102_t01	AgB08X	1447742	1452504	-	ZK337.5	chrI	15001854	15005608	+	mec-3 dependent expression family member (mtd-1)
AgB08X_g103_t05	AgB08X	1455771	1463502	-	F57C9.1a	chrI	4849070	4850717	+	Pyridoxal kinase
AgB08X_g104_t03	AgB08X	1480227	1495935	-	F55D12.4a	chrI	7899037	7903334	-	Steroid receptor seven-up, isoform B/C
AgB08X_g107_t04	AgB08X	1514321	1523580	+	C25A1.11a	chrI	10193925	10197000	-	Aryl hydrocarbon receptor nuclear translocator
AgB08X_g108_t01	AgB08X	1520971	1528979	-	C25A1.13	chrI	10193242	10193999	+	39S ribosomal protein L43
AgB08X_g109_t02	AgB08X	1530343	1533269	+	C01A2.5	chrI	13384752	13387084	+	Calcineurin-binding protein cabin-1
AgB08X_g110_t02	AgB08X	1529881	1541038	-	F56E10.1a	chrV	104826	118162	+	Calcineurin-binding protein cabin-1
AgB08X_g111_t01	AgB08X	1557923	1561340	-	Y47H9C.7	chrI	11891549	11893727	-	Translation initiation factor eIF-2B subunit beta
AgB08X_g112_t02	AgB08X	1566140	1585736	+	C48B6.8	chrI	6917750	6922955	-	Protein PTHB1
AgB08X_g114_t01	AgB08X	1622620	1625841	-	C48B6.2	chrI	6916766	6917560	+	40S ribosomal protein S4-like protein
AgB08X_g115_t04	AgB08X	1630364	1658348	-	Y18H1A.9	chrI	748228	757010	-	carboxypeptidase a2
AgB08X_g116_t03	AgB08X	1658454	1687758	-	F54A5.3a	chrI	969089	973133	-	shc-transforming protein 1
AgB08X_g117_t04	AgB08X	1685808	1691826	+	F30A10.5a	chrI	9486642	9488029	-	stomatin-like protein 2
AgB08X_g118_t01	AgB08X	1691917	1697152	-	F30A10.1	chrI	9472642	9474794	-	Calcium and integrin-binding family member 2
AgB08X_g119_t01	AgB08X	1699304	1713757	-	F45H11.1a	chrI	10366621	10371699	+	transcription factor sp9
AgB08X_g121_t01	AgB08X	1718895	1736557	-	F23C8.4	chrI	2434004	2435708	+	comm domain-containing protein 4
AgB08X_g129_t01	AgB08X	1805249	1811740	-	F18A11.2	chrII	13032778	13036505	+	cral-trio domain-containing protein
AgB08X_g131_t01	AgB08X	1872186	1876637	+	Y17G7B.1	chrII	11972310	11973732	-	acyl- -binding protein-like protein 1
AgB08X_g133_t01	AgB08X	1934786	1957602	+	F42A8.1	chrII	9341397	9346590	-	Uncharacterized protein F42A8.1
AgB08X_g134_t03	AgB08X	1986213	2003055	+	T07D4.2a	chrII	8869549	8871954	-	UPF0046 protein T07D4.2
AgB08X_g136_t01	AgB08X	2030991	2032854	+	ZK1290.10	chrII	7551951	7553906	-	Uncharacterized protein ZK1290.10
AgB08X_g137_t05	AgB08X	2035253	2054737	-	F07F6.4	chrII	5425750	5429572	-	ADP-ribosylation factor GTPase-activating protein 1
AgB08X_g138_t04	AgB08X	2057620	2084717	-	Y53F4B.21	chrII	15090172	15109042	+	WASH complex subunit 7, partial
AgB08X_g139_t01	AgB08X	2086497	2102006	-	F10G7.2	chrII	4706821	4710052	+	Nuclease domain-containing protein 1
AgB08X_g141_t01	AgB08X	2106425	2114470	+	F15A4.11	chrII	12459772	12460551	+	hypothetical protein
AgB08X_g143_t05	AgB08X	2120674	2127837	-	C04G6.1a	chrII	5104430	5108901	+	mitogen-activated protein kinase 7
AgB08X_g144_t01	AgB08X	2133505	2152823	+	Y54E2A.2	chrII	14746890	14752489	-	Protein smg-9
AgB08X_g146_t01	AgB08X	2166437	2179792	-	C01F1.2	chrII	4299653	4300919	+	protein sco1
AgB08X_g149_t03	AgB08X	2191636	2201283	-	T13B5.1	chrII	1092006	1097899	+	sodium- and chloride-dependent creatine transporter 1
AgB08X_g152_t05	AgB08X	2239665	2255443	+	W07A12.4	chrII	9148356	9152311	+	BTB/POZ domain-containing protein 17
AgB08X_g153_t01	AgB08X	2271023	2286375	+	F43E2.3	chrII	7359961	7363247	+	Peptide methionine sulfoxide reductase
AgB08X_g154_t03	AgB08X	2275208	2291935	-	F43E2.5	chrII	7363217	7364107	-	peptide methionine sulfoxide reductase
AgB08X_g155_t03	AgB08X	2294882	2300938	+	Y17G7B.7	chrII	12036842	12039139	-	Triosephosphate isomerase
AgB08X_g157_t01	AgB08X	2302497	2324689	+	Y17G7B.9	chrII	12028763	12036742	-	Triosephosphate isomerase
AgB08X_g159_t06	AgB08X	2322123	2362123	-	K02C4.4a	chrII	8088427	8092754	-	Kyphoscoliosis peptidase
AgB08X_g160_t06	AgB08X	2379319	2456459	-	Y64G10A.7a	chrIV	14291901	14319564	+	Multiple epidermal growth factor-like domains protein 6
AgB08X_g161_t02	AgB08X	2477535	2484841	-	F59E12.11a	chrII	5647986	5649472	-	Loss of heterozygosity 12 chromosomal region 1 protein, partial
AgB08X_g162_t03	AgB08X	2492095	2495913	-	B0024.12	chrV	10319535	10320158	-	glucosamine 6-phosphate n-acetyltransferase
AgB08X_g164_t03	AgB08X	2504973	2536212	-	C47G2.2	chrII	11281986	11283953	+	forkhead box protein d3
AgB08X_g167_t01	AgB08X	2564353	2566732	-	C55A6.12a	chrV	11501444	11503127	-	hypothetical protein
AgB08X_g168_t03	AgB08X	2575183	2608804	-	K06A1.6	chrII	6456522	6467642	-	diacylglycerol kinase
AgB08X_g169_t01	AgB08X	2638977	2654098	-	F07H5.2	chrII	8782029	8783670	-	Delta-sarcoglycan
AgB08X_g170_t06	AgB08X	2658584	2660837	+	M176.2	chrII	9414559	9416431	-	Glutathione synthetase
AgB08X_g171_t01	AgB08X	2661297	2678856	-	C07E3.2	chrII	10339692	10345112	-	Nucleolar complex protein 2
AgB08X_g174_t01	AgB08X	2700524	2719987	-	T05H10.5a	chrII	8062743	8066193	+	ubiquitin conjugation factor e4 b
AgB08X_g175_t02	AgB08X	2728069	2744149	+	K02F3.2a	chrIII	845842	850586	+	Calcium-binding carrier
AgB08X_g178_t02	AgB08X	2773403	2790903	-	T28D9.7	chrII	6474338	6482125	-	degenerin-like protein
AgB08X_g180_t01	AgB08X	2800507	2805636	+	C54C6.6	chrIII	3534660	3537496	-	Fructose-bisphosphate aldolase 1, partial
AgB08X_g184_t01	AgB08X	2809711	2824931	+	F48E8.2	chrIII	5464381	5467992	+	e2f-associated phosphoprotein
AgB08X_g185_t03	AgB08X	2842271	2867717	-	F46H5.4	chrX	7245079	7254792	-	Dedicator of cytokinesis protein 7
AgB08X_g186_t04	AgB08X	2872691	2885402	+	C41C4.10a	chrII	8102108	8105052	-	Sideroflexin-5
AgB08X_g188_t01	AgB08X	2900653	2910175	-	H20J04.8	chrII	4324361	4326089	+	putative u2 small nuclear ribonucleoprotein a
AgB08X_g191_t01	AgB08X	2938975	2944737	+	C56C10.3	chrII	6589290	6591081	+	Charged multivesicular body protein 4b
AgB08X_g192_t03	AgB08X	2947659	2955720	+	C56C10.8	chrII	6587578	6588679	-	Transcription factor BTF3
AgB08X_g193_t01	AgB08X	2957017	2973932	+	C56C10.7a	chrII	6584409	6586755	-	Probable trafficking protein particle complex subunit 13 homolog
AgB08X_g194_t01	AgB08X	2985154	2996420	+	ZK669.4	chrII	7942463	7945206	-	Lipoamide acyltransferase component of branched-chain alpha-keto acid dehydrogenase complex
AgB08X_g199_t04	AgB08X	3066767	3117121	-	F26H11.2a	chrII	14390718	14407905	+	Nucleosome-remodeling factor subunit NURF301-like protein
AgB08X_g201_t01	AgB08X	3122386	3131935	-	W08F4.8a	chrII	577839	579892	-	Hsp90 co-chaperone cdc37
AgB08X_g202_t03	AgB08X	3138131	3143062	-	H20J04.3	chrII	4335707	4338424	+	bess motif family protein
AgB08X_g206_t02	AgB08X	3205070	3212189	-	R06F6.1	chrII	10785452	10787272	+	Histone RNA hairpin-binding protein
AgB08X_g208_t01	AgB08X	3217146	3223272	+	Y50C1A.2	chrI	412911	418660	-	hypothetical protein
AgB08X_g209_t02	AgB08X	3229593	3254521	+	Y48G8AR.1a	chrI	1259374	1268155	-	Protein grainyhead
AgB08X_g210_t01	AgB08X	3251889	3263289	-	Y48G8AL.15	chrI	1254770	1258258	+	nucleoside diphosphate kinase 6
AgB08X_g211_t01	AgB08X	3255855	3272880	+	F43E2.4	chrII	7353576	7356426	-	atp-binding cassette sub-family b member 9
AgB08X_g213_t03	AgB08X	3282911	3292308	+	W04C9.1a	chrI	489969	496150	+	atp-binding cassette sub-family b member 9
AgB08X_g214_t02	AgB08X	3295378	3300657	-	W09C5.1	chrI	13626522	13628447	-	Ribosome biogenesis protein NSA2
AgB08X_g215_t01	AgB08X	3302789	3306382	-	C48B6.3	chrI	6915049	6916609	+	ribosome biogenesis protein nsa2-like protein
AgB08X_g216_t02	AgB08X	3309938	3320133	+	C01H6.7a	chrI	7224656	7227760	+	Bromodomain-containing protein 7
AgB08X_g217_t01	AgB08X	3322625	3346927	-	Y106G6G.2	chrI	10323792	10327870	-	brefeldin a-inhibited guanine nucleotide-exchange protein 3
AgB08X_g218_t03	AgB08X	3347793	3361506	-	B0025.1a	chrI	6028486	6033455	+	phosphatidylinositol 3-kinase catalytic subunit type 3
AgB08X_g219_t01	AgB08X	3364657	3370821	+	C05D9.1	chrX	1128986	1132925	+	Sorting nexin-1
AgB08X_g220_t01	AgB08X	3368854	3383536	-	D2030.1	chrI	7567824	7571250	-	Mannosyl-oligosaccharide alpha-1,2-mannosidase isoform A
AgB08X_g222_t02	AgB08X	3389456	3401524	+	C43E11.10	chrI	4268070	4270287	-	cell division control protein 6-like protein
AgB08X_g223_t01	AgB08X	3390416	3395715	-	Y47D9A.2a	chrI	4298184	4302243	+	ctd small phosphatase-like protein 2
AgB08X_g225_t01	AgB08X	3410858	3414530	+	C43E11.9	chrI	4267199	4267967	-	60S ribosome subunit biogenesis protein NIP7
AgB08X_g226_t04	AgB08X	3437452	3461216	-	C10G11.7a	chrI	6284973	6289340	+	hypothetical protein
AgB08X_g227_t01	AgB08X	3454963	3469194	-	Y53G8AM.8	chrIII	3267178	3278710	-	hypothetical protein
AgB08X_g231_t03	AgB08X	3538015	3559073	-	F41C6.1	chrX	6889689	6897140	+	Netrin unc-6, partial
AgB08X_g237_t03	AgB08X	3588335	3603687	-	C42D8.5a	chrX	5092481	5097067	-	inactive angiotensin-converting enzyme-related protein
AgB08X_g239_t02	AgB08X	3615169	3622574	-	C02H7.1	chrX	763769	766713	+	traf3-interacting protein 1
AgB08X_g241_t03	AgB08X	3635217	3667117	+	C02H7.3a	chrX	751211	759732	-	MAP kinase-activating death domain protein
AgB08X_g243_t02	AgB08X	3669596	3673491	-	C18D1.4	chrII	10056311	10060582	-	stargazin related protein stg-1
AgB08X_g247_t04	AgB08X	3703794	3720047	+	F52B10.2	chrX	2918730	2923984	-	Heparan sulfate glucosamine 3-O-sulfotransferase 3B1
AgB08X_g251_t07	AgB08X	3745698	3796692	-	E01H11.1a	chrX	9371130	9386035	+	Protein kinase C-like 2
AgB08X_g253_t02	AgB08X	3807187	3815509	-	F39D8.3a	chrX	15422494	15425114	+	putative g-protein coupled receptor
AgB08X_g254_t04	AgB08X	3829723	3847467	+	T28B4.1a	chrX	6592579	6596135	+	f-box lrr-repeat protein 2-like isoform 1
AgB08X_g255_t03	AgB08X	3847769	3868795	-	H28G03.1a	chrX	5216363	5219095	+	Heterogeneous nuclear ribonucleoprotein A1
AgB08X_g259_t01	AgB08X	3889963	3899895	-	C25G6.5	chrX	1251998	1255629	-	neuropeptide y receptor 11
AgB08X_g263_t01	AgB08X	3937124	3943880	+	ZC449.2	chrX	5021215	5024258	+	hypothetical protein
AgB08X_g265_t03	AgB08X	3955973	3963753	-	R102.4a	chrIV	10693041	10694411	-	Uncharacterized protein R102.4
AgB08X_g267_t02	AgB08X	3979008	4013467	+	F49E2.5a	chrX	9543670	9560316	+	L-aminoadipate-semialdehyde dehydrogenase-phosphopantetheinyl transferase
AgB08X_g270_t04	AgB08X	4019722	4035122	-	K07H8.10	chrIV	8286587	8289529	-	Nucleolin
AgB08X_g274_t01	AgB08X	4091068	4101476	+	F22F4.2	chrX	5996156	5998243	+	Innexin-3
AgB08X_g276_t01	AgB08X	4112871	4151497	-	F14D12.1a	chrX	5603766	5608780	+	protein dok-7
AgB08X_g278_t03	AgB08X	4163514	4183168	-	Y32H12A.5	chrIII	5375698	5379929	-	progestin and adipoq receptor-like protein 1
AgB08X_g279_t02	AgB08X	4185552	4202207	-	ZC374.1	chrX	10049460	10052481	+	Gonadotropin-releasing hormone II receptor
AgB08X_g280_t05	AgB08X	4225989	4245575	+	ZC374.2	chrX	10034836	10047417	-	Protein sidekick
AgB08X_g281_t06	AgB08X	4248278	4261875	+	B0035.2	chrIV	11312437	11313980	-	DnaJ dnj-2
AgB08X_g282_t04	AgB08X	4254486	4270150	-	B0035.1a	chrIV	11310972	11312382	+	Zinc finger protein 207
AgB08X_g284_t02	AgB08X	4289541	4305015	-	T22B11.4a	chrIV	4679018	4682651	+	hypothetical protein
AgB08X_g285_t02	AgB08X	4329800	4348621	-	W02C12.3a	chrIV	4014799	4018962	-	Transcription factor E3, partial
AgB08X_g287_t02	AgB08X	4397693	4424446	+	T02C5.3a	chrX	2698257	2705859	-	hypothetical protein
AgB08X_g289_t02	AgB08X	4443557	4450952	-	T07D1.2	chrX	2429862	2439003	-	Protein RMD5 A
AgB08X_g294_t04	AgB08X	4480461	4505530	+	T07D1.4a	chrX	2445500	2450504	-	Sex determination protein fox-1
AgB08X_g296_t02	AgB08X	4539872	4562006	-	F15A2.6a	chrX	13487555	13500662	-	serine threonine kinase sad-1
AgB09X_g001_t02	AgB09X	12411	14837	+	K01A2.5a	chrII	302405	303659	+	Valacyclovir hydrolase
AgB09X_g005_t01	AgB09X	34472	45606	+	W09H1.1a	chrII	13175857	13181561	-	hypothetical protein
AgB09X_g015_t06	AgB09X	202917	207716	-	W01D2.5a	chrII	14813054	14814889	+	organic solute transporter alpha-like protein
AgB09X_g019_t01	AgB09X	269836	278671	-	F46C5.4	chrII	8836175	8839313	+	Uncharacterized protein F46C5.4
AgB09X_g024_t05	AgB09X	346522	411657	+	F56D12.4a	chrII	1326995	1350136	+	JNK-interacting protein 1
AgB09X_g030_t01	AgB09X	517439	540151	+	H34C03.2a	chrIV	6757311	6762609	+	Ubiquitin carboxyl-terminal hydrolase 4
AgB09X_g031_t02	AgB09X	544285	557841	-	C01B10.11	chrIV	6657981	6660434	+	hypothetical protein
AgB09X_g033_t01	AgB09X	584650	597393	-	B0218.3	chrIV	8148794	8151156	+	Mitogen-activated protein kinase pmk-1
AgB09X_g038_t01	AgB09X	898179	914254	-	W02B8.5	chrII	13930648	13931997	-	cre-hot-3 protein
AgB09X_g042_t01	AgB09X	977461	992255	+	T28C6.7a	chrIV	8827804	8840682	+	Cingulin-like protein 1
AgB09X_g046_t02	AgB09X	1066638	1093144	-	Y69A2AR.16a	chrIV	2497801	2530296	+	Exportin-4
AgB09X_g047_t01	AgB09X	1094334	1104571	-	Y69A2AR.18a	chrIV	2495735	2497675	+	ATP synthase subunit gamma
AgB09X_g049_t02	AgB09X	1120227	1129886	+	F46C5.9	chrII	8808636	8810729	-	Transducin beta-like protein 2
AgB09X_g050_t02	AgB09X	1134426	1139669	+	F46C5.8	chrII	8811353	8812605	+	Protein RER1
AgB09X_g051_t01	AgB09X	1143328	1157776	+	C17G10.9a	chrII	5619590	5622483	-	Eukaryotic translation initiation factor 3 subunit L
AgB09X_g054_t04	AgB09X	1185739	1198094	-	F35H8.3	chrII	9557646	9559516	+	Zinc finger and BTB domain-containing protein 24
AgB09X_g055_t06	AgB09X	1234934	1284057	-	F13H8.10a	chrII	6274115	6279699	+	Biotin--protein ligase
AgB09X_g057_t01	AgB09X	1304626	1315919	-	F10G7.8	chrII	4696419	4698427	-	26s proteasome non-atpase regulatory subunit 12
AgB09X_g058_t06	AgB09X	1320441	1343520	-	F14E5.2a	chrII	8423954	8428855	-	Golgi apparatus protein 1
AgB09X_g060_t02	AgB09X	1365157	1381640	-	F58G11.5	chrV	13675988	13678598	-	Calcium homeostasis endoplasmic reticulum protein
AgB09X_g062_t01	AgB09X	1393546	1406543	+	T02G5.8	chrII	7073796	7075551	+	Acetyl-CoA acetyltransferase A
AgB09X_g063_t01	AgB09X	1427852	1443609	+	F40F8.8a	chrII	11145843	11150381	+	Arrestin domain-containing protein 2, partial
AgB09X_g067_t02	AgB09X	1484129	1497051	+	C28F5.2	chrII	7507319	7513975	-	globin-like protein 9
AgB09X_g069_t04	AgB09X	1533758	1558369	-	Y54G9A.3a	chrII	13708453	13712911	+	potassium voltage-gated channel subfamily kqt member 1
AgB09X_g072_t01	AgB09X	1609295	1636524	+	Y110A2AL.8a	chrII	2845384	2852128	-	Protein patched 1
AgB09X_g074_t01	AgB09X	1653758	1700724	+	E01G4.4a	chrII	13448835	13460642	-	putative g-protein coupled receptor tkr-1
AgB09X_g075_t01	AgB09X	1702400	1708249	-	Y38F2AR.2	chrIV	2389445	2390386	+	Translocon-associated protein subunit gamma
AgB09X_g076_t01	AgB09X	1710067	1720591	-	T09A5.11	chrII	7864074	7866256	+	dolichyl-diphosphooligosaccharide--protein glycosyltransferase 48 kda subunit
AgB09X_g082_t01	AgB09X	1759045	1763728	-	Y51H1A.4	chrII	13876034	13882585	+	Inhibitor of growth protein 3
AgB09X_g083_t01	AgB09X	1780772	1785682	-	Y51H1A.3a	chrII	13872869	13875423	+	nadh dehydrogenase 1 beta subcomplex subunit
AgB09X_g087_t03	AgB09X	1826978	1841043	-	F54A3.3	chrII	2233540	2243539	+	T-complex protein 1 subunit gamma
AgB09X_g088_t02	AgB09X	1847431	1926340	-	F44G4.8a	chrII	9005796	9019775	-	Tyrosine-protein phosphatase 10D
AgB09X_g089_t03	AgB09X	1946443	2000698	-	F29C12.3a	chrII	13098249	13116806	-	Rapamycin-insensitive companion of mTOR
AgB09X_g090_t01	AgB09X	1977803	1985785	+	F29C12.1a	chrII	13108019	13110169	+	db module family protein
AgB09X_g092_t03	AgB09X	2041273	2063238	-	C32D5.3	chrII	6318087	6321101	-	Protein EFR3
AgB09X_g096_t02	AgB09X	2073260	2084708	+	ZK1290.3a	chrII	7544069	7545335	+	Cuticle collagen 6
AgB09X_g098_t01	AgB09X	2113024	2119665	+	F01D5.6	chrII	14006511	14008514	+	hypothetical protein
AgB09X_g100_t02	AgB09X	2122792	2141198	+	C34B7.4	chrI	8333082	8336144	+	histone acetyltransferase kat7
AgB09X_g101_t05	AgB09X	2145247	2155034	+	T01E8.4	chrII	10236936	10239695	-	f-box wd repeat-containing protein 9
AgB09X_g102_t04	AgB09X	2186875	2198037	+	T01E8.3	chrII	10222877	10229440	+	1-phosphatidylinositol-4,5-bisphosphate phosphodiesterase gamma-1
AgB09X_g106_t05	AgB09X	2246716	2321081	-	K07D4.7a	chrII	4004885	4016072	+	Ephexin-1
AgB09X_g111_t01	AgB09X	2440902	2470713	+	K11D9.1a	chrIII	10805930	10810999	+	Kinesin-like protein KIF2A
AgB09X_g112_t01	AgB09X	2481119	2512439	+	C04A2.7a	chrII	6854190	6858298	-	DnaJ dnj-5
AgB09X_g113_t03	AgB09X	2515476	2523378	+	D1081.9	chrI	8485876	8487043	-	ring finger protein
AgB09X_g115_t01	AgB09X	2534264	2599166	-	C25H3.8	chrII	5669788	5679276	-	Vacuolar protein sorting-associated protein 13D
AgB09X_g117_t01	AgB09X	2604076	2606286	-	Y57G7A.9	chrII	1300064	1301641	-	hypothetical protein
AgB09X_g120_t01	AgB09X	2631606	2634853	-	C23H3.9a	chrII	74180	77460	-	metallo-beta-lactamase domain-containing protein 1
AgB09X_g122_t01	AgB09X	2655491	2663479	-	C50D2.9	chrII	88221	91519	-	Malonyl-CoA-acyl carrier protein transacylase
AgB09X_g123_t01	AgB09X	2672662	2677680	-	C50D2.7	chrII	92169	95277	-	ADP-dependent glucokinase
AgB09X_g124_t02	AgB09X	2679050	2683877	+	C07E3.9	chrII	10350760	10351613	+	Phospholipase A2, major isoenzyme, partial
AgB09X_g126_t01	AgB09X	2705525	2722652	+	M03C11.7	chrIII	10424112	10427982	-	U4/U6 small nuclear ribonucleoprotein Prp3
AgB09X_g127_t01	AgB09X	2723620	2729531	+	T05H10.3	chrII	8049049	8050564	-	Uncharacterized protein T05H10.3
AgB09X_g128_t04	AgB09X	2741739	2750616	+	C08H9.15	chrII	9881193	9882530	+	hypothetical protein
AgB09X_g130_t01	AgB09X	2754897	2784308	+	Y76B12C.2	chrIV	1993089	2008993	+	dna repair protein complementing xp-c cells-like protein
AgB09X_g131_t03	AgB09X	2782094	2797020	-	F01G10.1	chrIV	10243591	10245752	+	transketolase
AgB09X_g134_t08	AgB09X	2826410	2832201	-	C32D5.6	chrII	6331899	6333987	-	tetratricopeptide repeat protein 39b
AgB09X_g136_t05	AgB09X	2824004	2828162	+	R148.6	chrIII	3198477	3199516	-	Heh-1
AgB09X_g137_t01	AgB09X	2842970	2857798	-	F45H10.1a	chrII	13487263	13488172	-	succinate-semialdehyde
AgB09X_g138_t01	AgB09X	2861554	2865089	-	T13F2.5	chrIV	9781043	9784686	-	cre-sre-4 protein
AgB09X_g140_t02	AgB09X	2910104	2929206	+	W07E6.3b	chrII	495424	498659	+	sphingomyelin synthase-related 2
AgB09X_g141_t02	AgB09X	2937666	2948389	+	R08D7.3	chrIII	8969638	8971578	-	Eukaryotic translation initiation factor 3 subunit D, partial
AgB09X_g142_t02	AgB09X	2949482	2955078	+	F10B5.2	chrII	8144762	8147236	+	Uncharacterized protein F10B5.2
AgB09X_g144_t02	AgB09X	2976828	2985557	-	F26C11.2	chrII	9897754	9900376	-	homeobox protein unc-4-like protein
AgB09X_g146_t20	AgB09X	3010159	3031877	-	H03A11.2	chrX	15225869	15230645	-	Golgin subfamily A member 6-like protein 22
AgB09X_g147_t02	AgB09X	3060683	3071205	-	C34C6.3	chrII	8691789	8694180	+	Protein TsetseEP
AgB09X_g149_t05	AgB09X	3125340	3138332	+	R05F9.10	chrII	4902288	4903796	-	Small glutamine-rich tetratricopeptide repeat-containing protein beta
AgB09X_g150_t01	AgB09X	3131200	3147133	-	T01E8.1	chrII	10206715	10209391	+	Small glutamine-rich tetratricopeptide repeat-containing protein beta
AgB13X_g017_t01	AgB13X	312046	320263	-	T02G5.13a	chrII	7099587	7101163	-	Methylmalonic aciduria type A
AgB13X_g018_t01	AgB13X	320719	328390	-	F10E7.8a	chrII	7101268	7105030	-	Protein FAM40B
AgB13X_g019_t03	AgB13X	330823	337791	+	Y17G7B.3	chrII	11989024	11992823	+	hydroxyacylglutathione
AgB13X_g023_t01	AgB13X	364598	370930	+	K11G12.4a	chrX	6719666	6723066	-	NRAMP-like transporter smf-1
AgB13X_g025_t01	AgB13X	395398	403144	+	M02D8.4a	chrX	8748434	8750969	-	asparagine synthetase
AgB13X_g028_t01	AgB13X	432474	447705	-	F41E7.2	chrX	10273692	10278261	+	Sodium/hydrogen exchanger-like domain-containing protein 1
AgB13X_g031_t01	AgB13X	487662	501398	+	ZC373.4	chrX	10062451	10069783	-	Myosin light chain kinase 3
AgB13X_g034_t04	AgB13X	546574	621320	+	Y34B4A.4a	chrX	5264330	5271799	+	Rap guanine nucleotide exchange factor 1
AgB13X_g035_t02	AgB13X	624429	642739	+	F16H11.1	chrX	4668071	4673234	+	major facilitator superfamily domain-containing protein 12
AgB13X_g036_t03	AgB13X	648795	664090	+	C34F6.7	chrX	11210107	11215470	-	transmembrane protein
AgB13X_g037_t03	AgB13X	729811	745388	+	F46C3.3a	chrX	11420477	11433524	-	Myosin-XV
AgB13X_g039_t06	AgB13X	748963	778694	-	ZK455.2	chrX	11332553	11338301	-	atrial natriuretic peptide receptor 1
AgB13X_g040_t01	AgB13X	782627	787378	+	T04C12.5	chrV	11076737	11078168	-	Actin-2
AgB13X_g042_t01	AgB13X	864494	877776	+	C52B9.4	chrX	4260652	4264591	+	Transmembrane protein 87A
AgB13X_g044_t02	AgB13X	896071	946686	-	R03A10.6	chrX	15461843	15470758	+	sex peptide receptor
AgB13X_g046_t01	AgB13X	942759	957838	+	K09E2.2	chrX	8673060	8681653	+	hypothetical protein
AgB13X_g048_t01	AgB13X	960853	971378	+	K09E2.1	chrX	8681910	8686146	+	collagen alpha-5 chain
AgB13X_g050_t05	AgB13X	976747	1052940	+	C07A12.7a	chrX	4517748	4518686	-	Target of Myb protein 1
AgB13X_g052_t01	AgB13X	1068435	1082786	-	T19D7.4	chrX	658477	661777	-	RUN domain-containing protein 1
AgB13X_g055_t01	AgB13X	1122815	1132426	+	C03E10.4	chrV	11282572	11286039	+	Alpha-1,6-mannosyl-glycoprotein 2-beta-N-acetylglucosaminyltransferase
AgB13X_g062_t04	AgB13X	1225335	1237871	-	F49H6.5a	chrV	17023473	17025347	+	Molybdenum cofactor biosynthesis protein 1
AgB13X_g064_t01	AgB13X	1244911	1256917	-	T19D7.6	chrX	669684	670800	-	Transposon-derived protein
AgB13X_g065_t18	AgB13X	1285991	1303903	-	C28G1.3	chrX	8831739	8835715	-	Exocyst complex component 6
AgB13X_g066_t01	AgB13X	1304780	1312346	+	Y110A7A.10	chrI	5107833	5110183	+	Phosphatidylinositol 3-kinase regulatory subunit alpha
AgB13X_g068_t02	AgB13X	1317252	1351389	-	T14C1.1	chrX	14406117	14411181	+	G-protein coupled receptor, partial
AgB13X_g082_t01	AgB13X	1622718	1636983	+	C27C12.7	chrX	14831824	14838187	+	Dipeptidyl peptidase family member 2
AgB13X_g084_t03	AgB13X	1659805	1697316	+	C27C12.2	chrX	14845937	14849217	+	Early growth response protein 1
AgB13X_g085_t02	AgB13X	1690838	1740516	-	C14H10.3a	chrX	10220644	10228137	-	pyridoxal-dependent decarboxylase domain-containing protein 1
AgB13X_g086_t01	AgB13X	1772041	1804365	+	F02G3.1a	chrX	692978	703036	+	Neural cell adhesion molecule 1
AgB13X_g088_t02	AgB13X	1847664	1864831	-	F45E1.4	chrX	7985979	7988981	+	haloacid dehalogenase-like hydrolase family protein
AgB13X_g089_t09	AgB13X	1875771	1880685	+	F59F5.7	chrX	10559503	10566668	+	hypothetical protein
AgB13X_g090_t03	AgB13X	1899326	1925704	+	W01C8.5a	chrX	5694475	5697308	-	DOMON domain-containing protein
AgB13X_g091_t03	AgB13X	1928935	1960471	-	T22B7.1a	chrX	5668320	5674060	+	Transcription factor Sox-6
AgB13X_g092_t03	AgB13X	1992631	2009114	-	M03A8.4	chrX	6820005	6823268	-	cre-gei-15 protein
AgB13X_g094_t05	AgB13X	2024647	2069024	-	C54D2.5a	chrX	7847682	7875954	-	Voltage-dependent T-type calcium channel subunit alpha-1H
AgB13X_g096_t06	AgB13X	2114272	2159198	+	F15B9.7a	chrV	13019068	13033373	+	Protocadherin-like wing polarity protein stan
AgB15X_g002_t03	AgB15X	17416	28681	+	C36B1.4	chrI	8727214	8728497	-	Proteasome subunit alpha type-7
AgB15X_g003_t01	AgB15X	32818	44380	+	W03C9.7a	chrII	11970255	11972226	+	Tristetraprolin, partial
AgB15X_g006_t01	AgB15X	73541	82314	+	F31D4.2	chrV	20841573	20845546	-	Protein-glutamate O-methyltransferase
AgB15X_g007_t06	AgB15X	77882	110168	-	F53H4.1	chrX	15861294	15865918	-	DNA excision repair protein ERCC-6, partial
AgB15X_g009_t02	AgB15X	110774	115910	-	W01A11.1a	chrV	6499224	6502428	+	Epoxide hydrolase 1
AgB15X_g010_t01	AgB15X	121824	140317	-	T02E1.5a	chrI	8212423	8214304	-	Epidermal retinol dehydrogenase 2
AgB15X_g025_t01	AgB15X	339400	352137	+	ZK455.1	chrX	11339874	11343568	+	putative cytoplasmic aconitate hydratase
AgB15X_g026_t02	AgB15X	360075	376029	+	F33C8.1a	chrX	14710475	14718779	+	Tag-53
AgB15X_g029_t03	AgB15X	385771	392899	-	R07B1.1	chrX	9847275	9849518	+	homeobox protein vab-15
AgB15X_g030_t02	AgB15X	411758	423462	+	W09D10.1	chrIII	10736893	10739824	-	Stromal membrane-associated protein 2
AgB15X_g032_t03	AgB15X	427093	430976	+	C37C3.7	chrV	7835369	7837070	-	tenascin
AgB15X_g036_t03	AgB15X	451393	460597	-	F20D1.7	chrX	14987369	14991380	-	Leucine-rich repeat neuronal protein 2
AgB15X_g039_t01	AgB15X	496664	516116	+	C46F4.1a	chrX	5932768	5934532	+	neuropeptide receptor a8
AgB15X_g055_t02	AgB15X	759146	769722	-	B0513.5a	chrIV	13868556	13876615	-	Proline dehydrogenase
AgB15X_g058_t03	AgB15X	791164	798629	-	C05E7.4	chrX	12965485	12968731	+	FMRFamide receptor, partial
AgB15X_g059_t02	AgB15X	827595	849032	+	C33F10.5a	chrII	4798158	4805676	-	Contactin
AgB15X_g060_t05	AgB15X	851357	858821	+	Y105C5B.9	chrIV	15930581	15931813	+	phytanoyl- dioxygenase domain-containing protein 1-like protein
AgB15X_g061_t03	AgB15X	856516	878785	-	R05C11.1	chrIV	2066200	2071741	+	arrestin domain-containing protein 3
AgB15X_g062_t01	AgB15X	886554	900040	+	Y55F3AM.3a	chrIV	1012624	1019558	+	RNA-binding protein 39
AgB15X_g067_t01	AgB15X	913967	929787	-	B0035.16	chrIV	11295074	11296887	-	tRNA-specific 2-thiouridylase 1, partial
AgB15X_g069_t01	AgB15X	952305	974540	+	F59F3.5	chrX	10982351	10987928	+	Vascular endothelial growth factor receptor 2
AgB15X_g076_t02	AgB15X	1082506	1092633	-	F59F5.1	chrX	10529294	10532677	+	Monocarboxylate transporter 12
AgB15X_g077_t09	AgB15X	1107364	1116075	-	Y46G5A.2	chrII	12679954	12686713	+	protoheme ix
AgB15X_g078_t01	AgB15X	1120157	1124573	-	Y73B6BL.44	chrIV	6493599	6497378	+	hypothetical protein
AgB15X_g080_t03	AgB15X	1130716	1145199	+	W08D2.1	chrIV	9812444	9815526	-	protein wnt-7b
AgB15X_g081_t02	AgB15X	1145952	1155639	-	W07G9.2a	chrIV	3791588	3793856	+	Glucuronosyltransferase sqv-8
AgB15X_g082_t01	AgB15X	1165369	1203446	+	Y4C6B.6	chrIV	5344592	5350947	-	Glucosylceramidase
AgB15X_g084_t10	AgB15X	1239721	1275154	+	F33D4.2a	chrIV	7675174	7696921	+	Inositol 1,4,5-trisphosphate receptor type 1
AgB15X_g085_t01	AgB15X	1276612	1285451	+	Y56A3A.4a	chrIII	11862393	11869281	-	transcription initiation factor tfiid subunit 12
AgB15X_g086_t01	AgB15X	1286730	1314964	-	F20B6.8a	chrX	4210573	4214772	-	Homeodomain-interacting protein kinase 2
AgB15X_g087_t02	AgB15X	1323576	1330899	-	C07A4.2	chrX	10172326	10174185	+	golgi-associated plant pathogenesis-related protein 1
AgB15X_g091_t01	AgB15X	1395512	1396946	+	F13H6.5	chrV	6372114	6374933	-	hypothetical protein
AgB15X_g093_t02	AgB15X	1406617	1418523	-	H39E23.1a	chrV	14112802	14141119	-	Serine/threonine-protein kinase SIK2
AgB15X_g098_t04	AgB15X	1455517	1471087	+	T12A7.5	chrIV	11779216	11786969	+	ocalin-related protein family member (lpr-2)
AgB15X_g099_t01	AgB15X	1471810	1474862	-	Y94H6A.12a	chrIV	2711950	2713035	-	peptidyl-trna hydrolase ptrhd1
AgB15X_g100_t02	AgB15X	1475364	1481993	-	Y94H6A.7	chrIV	2713907	2716574	-	Low molecular weight phosphotyrosine protein phosphatase
AgB15X_g101_t01	AgB15X	1482433	1490170	+	Y57G11C.15a	chrIV	14822540	14825264	-	Protein transport protein Sec61 subunit alpha isoform 2
AgB15X_g102_t03	AgB15X	1492293	1499580	+	ZC434.6a	chrI	10340997	10345648	+	nicastrin
AgB15X_g103_t06	AgB15X	1503019	1510948	-	K02E10.4a	chrX	2483263	2488296	+	nicastrin
AgB15X_g104_t01	AgB15X	1522626	1535075	+	F09B12.1a	chrX	15101787	15107741	-	ing defective family member (mlt-9)
AgB15X_g109_t02	AgB15X	1589723	1606819	-	F58H12.1	chrX	2843922	2852520	-	serine threonine-protein kinase kin-29
AgB15X_g110_t01	AgB15X	1619657	1625455	-	F59B10.3	chrII	10510542	10512991	+	Uncharacterized protein F59B10.3
AgB15X_g111_t01	AgB15X	1630697	1647008	+	D2021.2a	chrX	8552261	8556351	+	Palmitoyltransferase ZDHHC17
AgB15X_g112_t04	AgB15X	1640169	1647168	-	F54C9.10	chrII	8581945	8583080	+	ADP-ribosylation factor-like protein 1
AgB15X_g113_t01	AgB15X	1649914	1658312	-	K02E10.1	chrX	2496180	2501001	+	Ras-related protein Rab-1A
AgB15X_g115_t03	AgB15X	1666757	1674400	-	K02E10.2a	chrX	2489044	2494339	+	Protein HID1
AgB15X_g121_t02	AgB15X	1750237	1758960	-	T22C1.8	chrI	7955978	7958505	-	Tyrosine-protein phosphatase non-receptor type 9
AgB15X_g127_t03	AgB15X	1842627	1859852	-	H27M09.1	chrI	6851372	6854140	+	ATP-dependent RNA helicase DDX41
AgB15X_g128_t05	AgB15X	1862782	1871546	-	K08E7.1	chrIV	12563775	12566111	-	TLD domain-containing protein
AgB15X_g130_t08	AgB15X	1907713	1916671	-	F37B4.7	chrV	2872465	2875600	-	Folate-like transporter 2
AgB15X_g131_t06	AgB15X	1931171	1942223	-	T10E9.7a	chrI	6530131	6533031	-	NADH dehydrogenase ubiquinone iron-sulfur protein 3
AgB15X_g139_t01	AgB15X	2052257	2058840	-	K07G5.3	chrI	7161016	7166518	+	coiled-coil and c2 domain-containing protein 2a
AgB16X_g007_t03	AgB16X	100914	107569	+	W02B12.8a	chrII	11464894	11468653	+	rho gtpase-activating protein 1
AgB16X_g008_t02	AgB16X	135361	155423	-	B0365.3	chrV	13126466	13129995	-	Sodium/potassium-transporting ATPase subunit alpha
AgB16X_g010_t03	AgB16X	210332	227245	+	ZK652.6a	chrIII	7829411	7832503	+	e3 ubiquitin-protein ligase kcmf1
AgB16X_g011_t03	AgB16X	250749	273475	-	T09B9.4	chrX	9771697	9774352	-	coiled-coil domain-containing protein 6
AgB16X_g016_t01	AgB16X	326573	341476	+	F22B7.10	chrIII	8659872	8667482	-	Protein dpy-19 3
AgB16X_g020_t01	AgB16X	420101	426407	+	W03F8.1	chrIV	5204591	5207138	+	Troponin I 4
AgB16X_g022_t03	AgB16X	438103	451648	+	C46C11.1a	chrX	4637242	4643695	+	hormone-sensitive lipase
AgB16X_g025_t03	AgB16X	496397	511717	+	H01A20.1	chrX	14558504	14561425	+	Nuclear hormone receptor family member nhr-3
AgB16X_g027_t01	AgB16X	546556	549462	+	R106.2	chrX	17483012	17486831	-	Probable G-protein coupled receptor C06G4.5
AgB16X_g029_t02	AgB16X	567488	581889	+	Y38C1BA.2a	chrIV	1805037	1808499	-	synapsin
AgB16X_g031_t02	AgB16X	618790	631784	-	D2062.12	chrII	2625092	2627070	+	Acetylcholine receptor-like protein cup-4
AgB16X_g032_t03	AgB16X	663792	679007	+	R01E6.7	chrX	13567441	13569954	-	hypothetical protein
AgB16X_g033_t05	AgB16X	676326	719127	-	F58A3.1a	chrX	11028917	11040605	+	lim domain-binding protein 2
AgB16X_g035_t02	AgB16X	755607	767306	-	F53F8.5	chrV	20700340	20704048	-	Uncharacterized protein C19orf47 homolog
AgB16X_g036_t06	AgB16X	797813	807794	+	C11G6.1a	chrX	16332440	16346027	+	Transcription initiation factor TFIID subunit 3
AgB16X_g037_t03	AgB16X	808873	818115	-	C52B11.3	chrX	1295278	1298823	+	Dopamine receptor 4
AgB16X_g039_t02	AgB16X	909046	915104	+	C02H7.2	chrX	731160	735672	-	cre-npr-19 protein
AgB16X_g043_t01	AgB16X	986154	994494	-	F59F5.5	chrX	10546062	10548962	+	hypothetical protein
AgB16X_g044_t03	AgB16X	999814	1035571	-	C11E4.6	chrX	9610563	9617045	+	Ankyrin repeat and sterile alpha motif domain-containing protein 1B
AgB16X_g048_t01	AgB16X	1099839	1109646	+	C15B12.7a	chrX	6499928	6504613	-	Zinc transporter 1
AgB16X_g049_t07	AgB16X	1198690	1223878	-	C37C3.2a	chrV	7855217	7857916	+	Eukaryotic translation initiation factor 5, partial
AgB16X_g054_t01	AgB16X	1191284	1198516	-	F58H1.8	chrV	11935148	11936528	+	hypothetical protein
AgB16X_g058_t01	AgB16X	1271909	1286861	-	R10D12.14a	chrV	13963734	13965405	+	Suppressor of aph-1
AgB16X_g061_t01	AgB16X	1311576	1356327	-	F29G9.2a	chrV	6023474	6026251	+	Coiled-coil domain-containing protein 85C-A, partial
AgB16X_g064_t04	AgB16X	1356842	1365244	+	Y48G1C.4a	chrI	49919	54426	+	CDP-diacylglycerol--glycerol-3-phosphate 3-phosphatidyltransferase
AgB16X_g065_t01	AgB16X	1369213	1373614	-	K07C11.1	chrV	8224965	8226037	+	paired box protein pax-9
AgB16X_g071_t01	AgB16X	1445650	1464862	+	R11G1.4a	chrX	3646320	3650150	-	Serine/threonine-protein kinase sax-1
AgB16X_g073_t01	AgB16X	1492781	1510495	+	F58H1.1	chrV	11927661	11933246	-	Alpha-mannosidase 2
AgB16X_g079_t01	AgB16X	1603282	1613990	-	F53C11.5a	chrV	13787536	13796254	+	zinc finger protein
AgB16X_g083_t05	AgB16X	1678681	1691436	-	ZK742.1a	chrV	7805064	7814571	+	Exportin-1
AgB16X_g090_t02	AgB16X	1801363	1807929	-	F54B11.4	chrX	13592618	13593643	+	hypothetical protein
AgB22X_g005_t01	AgB22X	61593	64616	-	Y48B6A.9	chrII	14211439	14213123	+	cre-hot-7 protein
AgB22X_g007_t03	AgB22X	111768	119958	+	F13B12.3a	chrIV	10439123	10443819	+	transient receptor potential cation channel subfamily m member 5
AgB22X_g008_t01	AgB22X	123969	131110	-	F33C8.4	chrX	14732283	14734457	+	hypothetical protein
AgB22X_g009_t03	AgB22X	134929	143277	-	T03G6.1	chrX	2608228	2609989	+	hypothetical protein
AgB22X_g010_t03	AgB22X	156756	175318	-	T03G6.2a	chrX	2594003	2606722	+	Nuclear hormone receptor family member nhr-40
AgB22X_g013_t01	AgB22X	286058	293421	-	ZK652.10	chrIII	7855840	7857242	-	Polymerase delta-interacting protein 2
AgB22X_g016_t01	AgB22X	409416	445995	-	M03A8.2	chrX	6809104	6817266	+	Autophagy-related protein 2 B
AgB22X_g022_t02	AgB22X	565259	577678	+	R02F2.9	chrIII	5499190	5499976	+	Peptidyl-tRNA hydrolase ICT1
AgB22X_g025_t05	AgB22X	596549	649765	-	R160.7	chrX	4378004	4383366	-	Lateral signaling target protein 2
AgB22X_g026_t01	AgB22X	671450	683231	+	ZC373.1a	chrX	10054281	10057524	+	Cystathionine beta-synthase
AgB22X_g028_t01	AgB22X	717065	735674	-	R160.1a	chrX	4389365	4393795	+	AP-2 complex subunit mu
AgB22X_g032_t01	AgB22X	777235	795566	+	ZK809.4a	chrIV	11653422	11655470	-	equilibrative nucleoside transporter 1
AgB22X_g034_t01	AgB22X	806508	827129	+	F56F10.4	chrX	864925	871089	-	Lethal(2) giant larvae protein 2
AgB22X_g035_t03	AgB22X	841322	856625	-	Y59C2A.1	chrII	2208112	2212863	+	Carboxypeptidase A2
AgB22X_g037_t02	AgB22X	892272	901769	-	T22B7.3	chrX	5647378	5650213	+	Uncharacterized protein ZK1307.1
AgB22X_g039_t06	AgB22X	937863	957833	+	K09E2.4a	chrX	8667635	8671753	+	Brother of CDO
AgB22X_g040_t02	AgB22X	974754	992395	+	T14E8.3a	chrX	6564175	6569518	-	Dopamine receptor 3
AgB22X_g041_t03	AgB22X	996572	1005853	+	F49H12.3	chrX	2084375	2085057	+	k+ channel tetramerisation domain containing protein
AgB22X_g042_t04	AgB22X	1011488	1016939	-	C49F8.2	chrX	13371612	13376992	-	Monocarboxylate transporter 12
AgB22X_g044_t01	AgB22X	1041540	1052435	-	C49F8.3	chrX	13386057	13387547	-	db module family protein
AgB22X_g045_t01	AgB22X	1068602	1085031	+	C43G2.1a	chrIV	6552479	6555920	-	progestin and adipoq receptor-like protein 1
AgB22X_g046_t02	AgB22X	1108181	1115394	+	F56F10.3	chrX	862268	863851	-	Cysteine dioxygenase 1
AgB22X_g047_t01	AgB22X	1113419	1121537	-	C11E4.8	chrX	9623304	9624714	+	hypothetical protein
AgB22X_g050_t01	AgB22X	1141131	1178955	-	C39D10.7	chrX	7907964	7913930	-	Chondroitin proteoglycan 2
AgB22X_g053_t03	AgB22X	1206624	1245904	-	W09B6.1a	chrII	1136801	1152665	+	Acetyl-CoA carboxylase 2
AgB22X_g054_t03	AgB22X	1264718	1269778	+	Y42G9A.3a	chrIII	6146214	6148065	+	leucine-rich repeat-containing protein 58
AgB27X_g001_t01	AgB27X	41337	48369	-	F59C6.12	chrI	10520863	10521986	+	UPF0598 protein F59C6.12
AgB27X_g006_t02	AgB27X	87420	109980	+	C43E11.6a	chrI	4231106	4236039	+	Neurabin-1
AgB27X_g007_t07	AgB27X	112098	131440	+	C32E12.2	chrI	5196078	5200102	+	putative 3 -cyclic phosphodiesterase pde-5
AgB27X_g009_t01	AgB27X	137292	152758	+	F46F11.7	chrI	5620751	5623035	+	Suppressor of lurcher protein 1
AgB27X_g010_t05	AgB27X	145041	169972	-	C15A11.3	chrI	7389049	7395918	-	Suppressor of lurcher protein 1
AgB27X_g012_t06	AgB27X	176479	209522	-	F32B5.7a	chrI	2673049	2680644	-	Glycine-rich domain-containing protein 2
AgB27X_g013_t01	AgB27X	226670	261203	+	C16C2.2a	chrI	9722550	9726263	+	Regulator of G-protein signaling 7, partial
AgB27X_g014_t04	AgB27X	248555	261644	-	H28O16.2	chrI	12647376	12652087	-	Microspherule protein 1
AgB27X_g015_t01	AgB27X	261274	269663	+	H28O16.1a	chrI	12652618	12654586	+	ATP synthase subunit alpha, partial
AgB27X_g016_t04	AgB27X	272990	284646	-	K07A1.7	chrI	9595276	9598363	-	Headcase protein
AgB27X_g018_t02	AgB27X	290568	302795	-	C16C2.4	chrI	9712825	9715230	-	synapse-associated protein 1
AgB27X_g019_t02	AgB27X	304792	320662	+	C16C2.3a	chrI	9715336	9728108	-	Type II inositol-1,4,5-trisphosphate 5-phosphatase
AgB27X_g020_t01	AgB27X	323936	329150	-	D1037.4	chrI	3682772	3684118	-	Ras-related protein Rab-8B
AgB28X_g006_t01	AgB28X	36619	52936	+	T01G9.6a	chrI	8288959	8291005	-	Casein kinase II subunit beta
AgB28X_g011_t05	AgB28X	134616	145407	-	T24H10.1	chrII	9099371	9100639	+	transcription elongation factor s-ii
AgB28X_g021_t03	AgB28X	216781	235395	-	B0414.5	chrI	5788634	5791752	-	Cytoplasmic polyadenylation element-binding protein 3
AgB28X_g023_t07	AgB28X	258272	279203	-	Y41E3.18	chrIV	15061929	15065748	-	Abhydrolase domain-containing protein
AgB31X_g005_t01	AgB31X	42726	58349	+	C07H6.5	chrIII	7495320	7497832	-	ATP-dependent RNA helicase cgh-1
AgB35X_g003_t02	AgB35X	17334	37012	+	R09B5.4	chrV	1462063	1464699	-	Solute carrier family 40 member 1
AgB35X_g004_t04	AgB35X	39377	55891	+	C18E9.6	chrII	8971965	8973566	-	Import receptor subunit TOM40
AgR009X_g003_t04	AgR009X	29507	38134	+	C25A1.5	chrI	10177181	10178921	+	Fatty acid 2-hydroxylase
AgR009X_g004_t01	AgR009X	35097	42810	-	K07A12.7	chrI	8691039	8692622	-	28s ribosomal protein
AgR009X_g007_t01	AgR009X	60846	74159	+	T25D3.4a	chrII	147241	152825	+	Hippocampus abundant transcript 1 protein
AgR009X_g008_t01	AgR009X	77168	86814	+	Y51H7C.11	chrII	1425758	1437499	-	nucleolar protein 6
AgR009X_g009_t01	AgR009X	96176	101117	+	F23F1.5	chrII	30061	31584	-	Snurportin-1
AgR009X_g010_t01	AgR009X	105217	116484	+	F23F1.4	chrII	25382	28423	-	hypothetical protein
AgR009X_g012_t03	AgR009X	142592	172132	+	W10C6.1	chrII	11112719	11120788	+	Anaphase-promoting complex subunit 1
AgR009X_g013_t01	AgR009X	130385	144239	-	C09H10.8	chrII	11109584	11111169	-	cre-glb-4 protein
AgR009X_g014_t11	AgR009X	174302	206679	+	ZK1236.1	chrIII	8429307	8431586	+	GTP-binding protein
AgR009X_g023_t02	AgR009X	309894	312640	-	F23F1.2	chrII	34204	35262	+	hypothetical protein
AgR009X_g025_t03	AgR009X	329274	348968	-	C01F1.6	chrII	4282321	4288211	-	Ankyrin repeat domain-containing protein 13C
AgR009X_g028_t02	AgR009X	376539	395937	+	T01H3.3	chrII	7870881	7873893	-	Sialin
AgR009X_g029_t03	AgR009X	396965	451078	+	F59G1.4a	chrII	5896170	5904588	+	domain-containing protein armc9
AgR009X_g031_t03	AgR009X	466121	477242	-	ZK930.3a	chrII	11897365	11901210	-	Zinc finger C4H2 domain-containing protein
AgR009X_g032_t03	AgR009X	486163	499409	+	M28.8	chrII	10628263	10633216	+	hypothetical protein
AgR009X_g037_t01	AgR009X	573956	585003	+	F40H3.4a	chrII	6189580	6191402	-	forkhead box protein i1c
AgR009X_g038_t02	AgR009X	585215	593140	-	Y53F4B.4a	chrII	14973453	14977000	+	Methyltransferase
AgR009X_g039_t01	AgR009X	593421	597140	-	Y53F4B.42	chrII	14969902	14971233	+	Methyltransferase-like protein 2-A
AgR009X_g040_t01	AgR009X	607086	626250	+	ZC581.3	chrI	6651220	6655430	+	hypothetical protein
AgR009X_g041_t05	AgR009X	644471	649145	+	Y67A6A.2a	chrI	9839598	9844809	+	Nuclear hormone receptor family member nhr-62
AgR009X_g046_t02	AgR009X	690353	696386	-	DY3.5	chrI	8771275	8777514	-	prion-like-domain-bearing protein family member (pqn-26)
AgR009X_g047_t04	AgR009X	697642	707008	-	DY3.2	chrI	8762986	8765633	+	Lamin-1
AgR009X_g048_t01	AgR009X	710247	714365	-	T23G7.3	chrII	9165929	9167830	-	PIN2/TERF1-interacting telomerase inhibitor 1
AgR009X_g052_t01	AgR009X	780005	781868	.	K02B12.1	chrI	8498114	8502412	-	homeobox protein ceh-6
AgR009X_g054_t11	AgR009X	812303	817689	-	Y47H9C.2	chrI	11836460	11849251	+	Palmitoyltransferase
AgR009X_g055_t01	AgR009X	827094	833377	+	F11C3.2	chrI	14872112	14875378	+	olfactomedin-like protein 2b
AgR009X_g056_t02	AgR009X	838359	848963	+	F29F11.1	chrV	10659635	10661467	-	UDP-glucose 6-dehydrogenase
AgR009X_g058_t01	AgR009X	876759	900689	-	T19A6.1a	chrI	8377627	8390027	-	PQ-loop repeat-containing protein 1
AgR009X_g059_t02	AgR009X	888036	896440	+	F16D3.7	chrI	8384931	8387039	+	G-protein coupled receptor No9, partial
AgR009X_g060_t01	AgR009X	901971	915671	-	T19A6.3a	chrI	8398918	8400472	+	Transmembrane protein 188
AgR009X_g061_t01	AgR009X	918927	934780	-	M05B5.5a	chrI	7190834	7193924	-	Transcription factor 12
AgR009X_g065_t04	AgR009X	1111207	1129020	-	C43E11.1	chrI	4270697	4273332	+	Apoptotic chromatin condensation inducer in the nucleus
AgR009X_g066_t01	AgR009X	1131497	1149962	-	K10D3.2	chrI	7122614	7128423	-	run domain containing protein
AgR009X_g067_t01	AgR009X	1154166	1164778	-	C10H11.1	chrI	4747490	4759601	+	Supervillin
AgR009X_g070_t05	AgR009X	1199057	1209300	-	F26H9.6	chrI	9308442	9310221	+	ras-related protein rab-5b
AgR009X_g071_t01	AgR009X	1214525	1230721	+	F14B4.1	chrI	9265951	9270919	-	prolow-density lipoprotein receptor-related protein 1
AgR009X_g072_t04	AgR009X	1234799	1248707	-	B0511.5	chrI	10628712	10631674	+	cuticlin-1
AgR009X_g076_t02	AgR009X	1255584	1270337	-	B0511.6	chrI	10625388	10628387	+	ATP-dependent RNA helicase pitchoune
AgR009X_g078_t02	AgR009X	1282295	1288014	+	F54A3.5	chrII	2224359	2225708	-	inner membrane organizing system protein
AgR009X_g079_t02	AgR009X	1294930	1302678	+	Y119C1B.3	chrI	4549695	4552758	+	Transmembrane protein 26
AgR009X_g080_t03	AgR009X	1302887	1312326	-	F10G8.9a	chrI	10049055	10050703	+	3-oxoacyl
AgR009X_g085_t01	AgR009X	1344492	1349824	-	F25H9.6	chrV	13466924	13468361	-	Phosphopantothenoylcysteine decarboxylase
AgR009X_g088_t03	AgR009X	1423827	1452419	+	K11D12.10a	chrV	5056378	5064803	-	Mitogen-activated protein kinase kinase kinase
AgR009X_g091_t01	AgR009X	1465161	1473308	+	Y113G7B.17	chrV	20267450	20269711	-	Protein arginine N-methyltransferase 8
AgR009X_g096_t05	AgR009X	1549124	1567821	-	ZK930.1a	chrII	11908714	11915852	-	Phosphoinositide 3-kinase regulatory subunit 4
AgR009X_g097_t02	AgR009X	1573275	1598877	-	F33A8.3	chrII	11039348	11041206	-	Y-box factor
AgR009X_g103_t02	AgR009X	1646682	1651736	+	F10G7.11	chrII	4727326	4727869	-	60S ribosomal protein L4, partial
AgR009X_g104_t03	AgR009X	1648941	1658468	-	F10G7.5a	chrII	4693542	4696408	+	Oxalate:formate antiporter
AgR009X_g105_t01	AgR009X	1671660	1715123	+	R53.3a	chrII	9955185	9962344	+	MDS1 and EVI1 complex locus protein EVI1
AgR009X_g106_t03	AgR009X	1738645	1754841	-	ZK1127.10	chrII	7056173	7058014	-	Cystathionine gamma-lyase 2
AgR009X_g118_t05	AgR009X	1882036	1891145	+	W05E10.4a	chrV	11709775	11715903	-	Trehalase
AgR009X_g121_t02	AgR009X	1940976	1955887	+	D1069.3b	chrII	341982	347891	-	Hyccin
AgR009X_g123_t02	AgR009X	2011121	2019249	+	Y48C3A.3	chrII	13309290	13311488	+	Failed axon connections
AgR009X_g124_t01	AgR009X	2027308	2039500	+	C06A1.2a	chrII	10570602	10571415	+	hypothetical protein
AgR009X_g125_t02	AgR009X	2042801	2049765	+	T21D12.3	chrIV	259989	261683	-	Polyglutamine-binding protein 1
AgR009X_g126_t01	AgR009X	2060343	2068548	+	K08F8.3	chrII	8756291	8758723	-	alpha-()-fucosyltransferase c
AgR009X_g127_t01	AgR009X	2066426	2070960	-	Y87G2A.15	chrI	13564567	13566362	+	cre-grd-15 protein
AgR009X_g129_t03	AgR009X	2096312	2106537	-	JC8.6a	chrIV	13241051	13243401	+	Protein lin-54
AgR009X_g130_t01	AgR009X	2108482	2121655	-	W04C9.5	chrI	462657	467131	-	ras-like protein 1
AgR009X_g132_t03	AgR009X	2144131	2164458	-	T12C9.3	chrII	4441265	4453151	-	t family of potassium channels protein 7
AgR009X_g133_t01	AgR009X	2177916	2185269	+	ZK632.12	chrIII	9830792	9832430	+	pleckstrin-like proteiny domain-containing family f member 2
AgR009X_g134_t01	AgR009X	2185765	2195638	-	T02D1.6a	chrIV	17408231	17413513	-	G-protein coupled receptor
AgR009X_g135_t01	AgR009X	2210875	2225094	-	F38E11.5	chrIV	9459731	9463998	+	Coatomer subunit beta
AgR009X_g136_t02	AgR009X	2229088	2238767	-	F38E11.6a	chrIV	9463951	9467518	-	hypothetical protein
AgR009X_g139_t01	AgR009X	2269041	2293546	+	W09C2.1a	chrIV	9614970	9620140	+	gata-binding factor 2
AgR009X_g143_t06	AgR009X	2356765	2365496	+	ZK1127.4	chrII	7053949	7055208	+	Protein BCCIP
AgR009X_g145_t01	AgR009X	2366636	2371140	+	R53.4	chrII	9967277	9968049	-	Putative ATP synthase subunit f, mitochondrial
AgR009X_g146_t01	AgR009X	2372702	2379987	+	R53.2	chrII	9962966	9967132	-	Thymidylate kinase
AgR009X_g151_t05	AgR009X	2411152	2434163	-	Y18D10A.5	chrI	12819216	12825562	+	Glycogen synthase kinase-3 beta
AgR009X_g152_t06	AgR009X	2451250	2463904	+	SSSD1.1	chrX	6379484	6384845	-	protein turtle
AgR009X_g153_t05	AgR009X	2472821	2480481	+	K03A1.2a	chrX	7292138	7296035	+	Leucine-rich repeat-containing protein 70
AgR009X_g154_t01	AgR009X	2476711	2484077	-	K03A1.4a	chrX	7296098	7298741	-	Calmodulin
AgR009X_g157_t01	AgR009X	2522434	2527870	-	K03D3.10	chrIV	16308225	16309829	+	Ras-related C3 botulinum toxin substrate 1
AgR009X_g160_t01	AgR009X	2556871	2573660	+	W10G6.2a	chrX	16254843	16260128	-	Serine/threonine-protein kinase sgk-1
AgR009X_g162_t04	AgR009X	2565566	2575504	-	F52H2.7	chrX	2566557	2572653	-	C2 domain-containing protein 5
AgR009X_g163_t02	AgR009X	2575737	2591437	+	T07F8.4	chrII	7130529	7132055	-	Mesoderm induction early response protein 1
AgR009X_g165_t04	AgR009X	2686341	2760403	+	C18D1.1a	chrII	10061999	10074426	-	die-1
AgR009X_g167_t01	AgR009X	2766832	2777888	+	B0495.5	chrII	7695935	7698506	-	Uncharacterized protein B0495.5
AgR009X_g169_t01	AgR009X	2806335	2829467	-	F39H12.4	chrX	845731	851516	-	Nephrin
AgR009X_g170_t03	AgR009X	2850893	2859847	+	C05E11.1	chrX	4588768	4590446	+	Protein lunapark-1
AgR009X_g171_t01	AgR009X	2860825	2881405	-	F31F6.4a	chrX	14881419	14882067	+	FMRFamide-like neuropeptides 14
AgR009X_g172_t01	AgR009X	2881954	2889023	-	ZK550.4	chrIV	17255301	17257562	+	General transcription factor IIE subunit 1
AgR009X_g174_t01	AgR009X	2896012	2918613	+	F35G12.3a	chrIII	4574898	4578437	-	AP2-associated protein kinase 1
AgR009X_g176_t01	AgR009X	2924507	2934262	+	F39H12.3	chrX	838144	841493	-	iq calmodulin-binding motif family protein
AgR009X_g177_t02	AgR009X	2935516	2938720	-	F21E9.2	chrX	1328143	1329947	-	hypothetical protein
AgR009X_g178_t02	AgR009X	2953591	2962756	+	C04C3.3	chrIV	3399672	3403904	+	Pyruvate dehydrogenase E1 component subunit beta
AgR009X_g179_t07	AgR009X	2970093	2980997	-	C33H5.11a	chrIV	7786000	7789613	-	intramembrane protease 2
AgR009X_g182_t01	AgR009X	2991284	3002614	-	R01H2.3	chrIII	7058521	7060597	-	Sortilin-related receptor
AgR009X_g184_t05	AgR009X	3030672	3054989	-	F29B9.2a	chrIV	4660993	4665204	+	Lysine-specific demethylase 7A
AgR009X_g186_t03	AgR009X	3077689	3082664	+	F53B6.1	chrI	8928748	8931089	+	Tetraspanin-11
AgR009X_g192_t01	AgR009X	3150483	3159425	-	C07D8.6	chrX	7341509	7342780	+	Alcohol dehydrogenase NADP+ A
AgR009X_g193_t01	AgR009X	3161856	3166736	+	T19D7.3	chrX	656188	658511	+	lpr-4 protein
AgR009X_g194_t04	AgR009X	3170835	3210835	-	F41D9.3a	chrX	8387470	8392581	-	MAM domain-containing glycosylphosphatidylinositol anchor protein 1
AgR009X_g197_t03	AgR009X	3235330	3247245	-	C02F12.1a	chrX	3681170	3684232	+	tetraspanin-17
AgR009X_g199_t03	AgR009X	3290367	3301427	-	F07A11.5	chrII	11612257	11614391	+	ribokinase
AgR009X_g201_t02	AgR009X	3321765	3331287	-	ZK418.7	chrIII	7079077	7080789	-	Putative G-protein coupled receptor B0244.7
AgR009X_g203_t01	AgR009X	3358261	3368163	+	C30B5.2a	chrII	6197180	6198308	+	Vacuolar protein sorting-associated protein 55
AgR009X_g207_t01	AgR009X	3420155	3428040	-	C09G5.13	chrII	10717336	10719579	+	Uncharacterized protein C09G5.8
AgR009X_g209_t08	AgR009X	3441098	3460517	+	W07G1.1	chrII	13937995	13939631	-	hypothetical protein
AgR009X_g210_t09	AgR009X	3478639	3489080	+	F49E12.6	chrII	8412671	8416857	+	Transcription factor E2F7
AgR009X_g211_t02	AgR009X	3492173	3502727	+	M01F1.5	chrIII	3510964	3519607	-	proton myo-inositol cotransporter
AgR009X_g212_t01	AgR009X	3516338	3526928	+	Y54E2A.11a	chrII	14795410	14796868	+	Eukaryotic translation initiation factor 3 subunit B
AgR009X_g214_t09	AgR009X	3575342	3592346	+	M02F4.8	chrX	3025505	3026976	+	aquaporin-3
AgR009X_g219_t01	AgR009X	3606805	3635340	+	T05H10.1	chrII	8042589	8047452	+	Ubiquitin carboxyl-terminal hydrolase 47
AgR009X_g220_t01	AgR009X	3627744	3635256	-	C06H2.1	chrV	11122820	11123867	-	cre-atp-5 protein
AgR009X_g222_t01	AgR009X	3649906	3665525	+	T05C12.10	chrII	8198803	8204001	+	warthog protein 8
AgR009X_g223_t01	AgR009X	3665963	3671411	+	M110.1	chrII	8204341	8207491	+	cuticle collagen 13
AgR009X_g224_t02	AgR009X	3667090	3679879	-	ZK938.3	chrII	9831648	9834364	-	cuticle collagen 13
AgR009X_g225_t01	AgR009X	3682295	3691943	+	Y54G9A.7	chrII	13724978	13725805	-	hypothetical protein
AgR009X_g228_t01	AgR009X	3716496	3718510	-	F42A8.3	chrII	9353000	9354327	+	osteopetrosis-associated transmembrane protein 1
AgR009X_g230_t01	AgR009X	3724640	3731623	+	F42A8.2	chrII	9350648	9352801	-	iron-sulfur subunit of succinate dehydrogenase
AgR009X_g233_t01	AgR009X	3746300	3755339	+	K07A3.1a	chrI	2581210	2586122	-	Fructose-1,6-bisphosphatase isozyme 2
AgR009X_g234_t01	AgR009X	3765147	3769014	+	F42G8.10	chrIV	8128948	8130256	-	hypothetical protein
AgR009X_g235_t01	AgR009X	3767520	3771063	-	F42G8.19	chrIV	8127734	8128909	+	hypothetical protein
AgR009X_g236_t01	AgR009X	3771243	3779616	-	C10C6.5	chrIV	11470185	11473419	+	abc transporter atp-binding protein permease wht-3
AgR009X_g245_t04	AgR009X	3903071	3918932	-	ZK1086.1a	chrX	13798222	13809857	-	Oxysterol-binding protein-related protein 8
AgR009X_g246_t01	AgR009X	3920107	3932172	+	C52B9.3a	chrX	4265851	4270486	+	Tubulin-specific chaperone cofactor E-like protein
AgR009X_g248_t01	AgR009X	3938472	3942812	-	C52B9.9	chrX	4271169	4274229	-	hypothetical protein
AgR009X_g249_t02	AgR009X	3945699	3954175	-	C52B9.6	chrX	4274786	4279344	-	t family of potassium channels protein 7
AgR009X_g250_t01	AgR009X	3961888	3971963	-	R09G11.1	chrX	17528344	17531980	+	Potassium channel regulatory protein sup-10
AgR009X_g251_t05	AgR009X	3977193	3990973	+	F47A4.3a	chrX	9823752	9831249	-	GTPase-activating protein rrc-1
AgR009X_g254_t01	AgR009X	4032550	4040563	-	T22H6.2a	chrX	12782396	12787146	+	Delta-1-pyrroline-5-carboxylate synthase
AgR009X_g256_t01	AgR009X	4052805	4079970	+	Y41E3.9a	chrIV	15025710	15037036	+	Fanconi anemia group D2 protein
AgR009X_g257_t01	AgR009X	4080952	4084758	+	K03A11.3	chrX	13074682	13076092	+	homeobox protein ceh-24
AgR009X_g260_t02	AgR009X	4093275	4106804	-	F16F9.5	chrX	8465832	8470256	-	degenerin mec-10
AgR009X_g263_t02	AgR009X	4122136	4135100	+	EEED8.9	chrII	5393293	5395694	-	serine threonine-protein kinase
AgR009X_g264_t01	AgR009X	4135168	4156463	+	R13A5.1a	chrIII	7584339	7591557	+	Mucolipin-3
AgR009X_g265_t01	AgR009X	4157529	4162215	-	C16A11.1a	chrII	4253052	4255281	+	guanine nucleotide-binding protein alpha-3 subunit
AgR009X_g267_t02	AgR009X	4169771	4181155	-	C26D10.3	chrII	8325386	8329658	+	Pyridine nucleotide-disulfide oxidoreductase domain-containing protein 1
AgR009X_g270_t01	AgR009X	4186530	4189641	-	F09E5.3	chrII	5373997	5375177	+	deoxyribose-phosphate aldolase
AgR009X_g273_t01	AgR009X	4266931	4281425	+	C34C6.5a	chrII	8699056	8701736	-	diacylglycerol kinase catalytic domain protein
AgR009X_g274_t02	AgR009X	4282998	4291412	+	VF13D12L.3	chrII	11705989	11713608	+	l-sulfolactate dehydrogenase
AgR009X_g275_t03	AgR009X	4289318	4296743	-	F13D12.9	chrII	11707452	11709587	-	Cyclopropane-fatty-acyl-phospholipid synthase
AgR009X_g276_t03	AgR009X	4300939	4311399	-	F54D12.6a	chrII	1368103	1374988	-	ras activating factor
AgR009X_g279_t01	AgR009X	4350701	4353629	+	T05C1.1	chrII	4478613	4480948	+	hypothetical protein
AgR009X_g280_t01	AgR009X	4357071	4361887	-	F46C5.2	chrII	8828212	8829287	-	Uncharacterized protein F46C5.2
AgR009X_g281_t04	AgR009X	4381297	4394138	-	F14F3.3	chrX	10521806	10524565	-	Lysophospholipid acyltransferase 7
AgR009X_g282_t03	AgR009X	4399533	4425482	+	C09F9.3a	chrII	14720552	14733524	-	cathepsin f
AgR009X_g283_t02	AgR009X	4420096	4425518	-	F54D5.8	chrII	11545563	11547366	+	DnaJ subfamily B member 1
AgR009X_g287_t05	AgR009X	4447722	4467260	+	K01C8.2	chrII	8267253	8269914	-	Uncharacterized protein ZC84.1
AgR009X_g288_t09	AgR009X	4467845	4484536	-	F22D3.2a	chrII	6928770	6947571	+	folliculin
AgR009X_g294_t04	AgR009X	4554331	4566724	+	C03A3.2	chrX	11262848	11266324	+	Transmembrane protein 104
AgR009X_g296_t01	AgR009X	4601276	4603223	-	T09B9.5	chrX	9777831	9780251	+	Uncharacterized protein T09B9.5
AgR009X_g298_t01	AgR009X	4625623	4646723	+	Y41G9A.4a	chrX	2957934	2961723	+	Gamma-aminobutyric acid type B receptor subunit 2
AgR009X_g301_t01	AgR009X	4694884	4709102	+	F40E10.6	chrX	14703715	14706857	-	Transmembrane protein 184B
AgR009X_g304_t01	AgR009X	4725171	4730198	+	T08D10.1	chrX	11944313	11946834	-	Nuclear transcription factor Y subunit alpha
AgR009X_g318_t07	AgR009X	5109155	5111701	-	C47G2.1	chrII	11269124	11271599	+	Cuticlin-1
AgR009X_g319_t01	AgR009X	5159232	5190584	+	B0495.10a	chrII	7711917	7718591	-	Tag-178
AgR009X_g320_t01	AgR009X	5191225	5208261	+	C50B6.9	chrV	13336369	13337957	+	hypothetical protein
AgR009X_g321_t04	AgR009X	5237947	5252496	+	F55C12.1a	chrII	5884552	5892664	+	Rab11 family-interacting protein 4
AgR009X_g322_t05	AgR009X	5272549	5286514	+	C25H3.7	chrII	5666756	5668930	-	myeloid leukemia factor
AgR009X_g325_t01	AgR009X	5292763	5302237	-	MTCE.26	chrMtDNA	7827	9428	+	NADH dehydrogenase subunit 4, partial (mitochondrion)
AgR009X_g327_t01	AgR009X	5294427	5303288	-	MTCE.23	chrMtDNA	5678	6449	+	cytochrome c oxidase subunit 3, partial (mitochondrion)
AgR009X_g330_t02	AgR009X	5330824	5338824	-	Y48B6A.13a	chrII	14220938	14226259	-	Diphosphomevalonate decarboxylase
AgR009X_g331_t03	AgR009X	5356985	5376548	-	2RSSE.1a	chrII	15268212	15273314	+	Rho GTPase-activating protein 20
AgR009X_g333_t03	AgR009X	5395957	5410478	-	K01C8.9	chrII	8280855	8283208	-	Guanine nucleotide-binding protein-like protein
AgR009X_g334_t01	AgR009X	5412257	5424438	-	Y39G8B.1a	chrII	13970789	13972970	-	Alcohol dehydrogenase NADP+
AgR009X_g335_t06	AgR009X	5426970	5436111	+	R07G3.5	chrII	7597545	7598752	-	Serine/threonine-protein phosphatase Pgam5
AgR009X_g336_t02	AgR009X	5436219	5442723	-	T15H9.3	chrII	9613463	9614812	-	Helix-loop-helix protein 6
AgR009X_g340_t01	AgR009X	5508668	5523863	+	F58A6.2	chrII	5136717	5138568	+	hypothetical protein
AgR009X_g342_t05	AgR009X	5531518	5542265	+	D2089.1a	chrII	10659208	10662317	+	putative splicing arginine serine-rich 7
AgR009X_g347_t01	AgR009X	5588933	5600734	+	Y51H7BR.7	chrII	1523565	1525598	-	Lysine-specific demethylase 4
AgR009X_g348_t02	AgR009X	5598345	5623737	-	Y48B6A.11	chrII	14234972	14243603	-	lysine-specific demethylase 4
AgR009X_g359_t02	AgR009X	5758703	6014744	+	C09D8.1a	chrII	10975539	11012247	+	Tyrosine-protein phosphatase Lar-like protein
AgR013X_g001_t01	AgR013X	5488	39941	-	Y71G12B.8	chrI	1767887	1790157	+	ATP-dependent RNA helicase DDX27
AgR013X_g002_t01	AgR013X	19102	23442	+	Y71G12B.26a	chrI	1779766	1782594	-	major facilitator superfamily protein
AgR013X_g003_t02	AgR013X	26714	32874	+	Y71G12B.25a	chrI	1771388	1775933	-	major facilitator superfamily protein
AgR013X_g005_t05	AgR013X	67048	93937	-	Y20F4.3a	chrI	1988246	2010525	-	ras gtpase-activating protein 1
AgR013X_g006_t01	AgR013X	96688	100132	+	Y20F4.2	chrI	2026277	2033966	+	cbn-crtc-1 protein
AgR013X_g007_t03	AgR013X	106845	119284	-	Y47G6A.6	chrI	3516450	3523387	+	Histone acetyltransferase KAT2B
AgR013X_g008_t01	AgR013X	127774	141601	+	ZK484.4a	chrI	6070679	6078895	-	hypothetical protein
AgR013X_g011_t05	AgR013X	159498	164139	-	T09B4.4	chrI	6167940	6168642	+	Calmodulin-like protein 4
AgR013X_g012_t02	AgR013X	164665	171614	-	T23G11.4	chrI	7694325	7695233	+	Uncharacterized protein C9orf78
AgR013X_g013_t03	AgR013X	171753	181595	-	F33D11.11	chrI	5868266	5869954	-	Vesicle-associated membrane protein-associated protein A
AgR013X_g016_t04	AgR013X	207120	215066	-	F33D11.12	chrI	5862645	5865011	-	Palmitoyltransferase ZDHHC3
AgR013X_g018_t01	AgR013X	224980	233315	-	Y54E10A.3	chrI	3229431	3233294	+	Thioredoxin-like protein 1
AgR013X_g019_t01	AgR013X	234887	245132	-	Y44E3A.4	chrI	3319540	3330673	-	variant sh3 domain containing protein
AgR013X_g020_t03	AgR013X	261088	272829	-	Y74C9A.5	chrI	27591	32544	-	Sestrin-3
AgR013X_g021_t05	AgR013X	303661	319845	+	Y71F9B.5a	chrI	2709919	2717345	+	Frizzled-10-B
AgR013X_g022_t02	AgR013X	322833	337897	-	F32B5.2	chrI	2697399	2699955	+	hypothetical protein
AgR013X_g023_t02	AgR013X	342262	359793	-	F16A11.1a	chrI	9393953	9404024	-	RING finger and SPRY domain-containing protein 1
AgR013X_g024_t05	AgR013X	363380	385622	+	W05B5.3a	chrI	13055664	13062122	-	Nuclear hormone receptor E75
AgR013X_g029_t01	AgR013X	444599	454223	-	Y34D9A.1	chrI	1019827	1029910	-	39s ribosomal protein
AgR013X_g030_t02	AgR013X	454732	464451	+	Y34D9A.6	chrI	1049596	1050727	+	Glutaredoxin-1
AgR013X_g032_t02	AgR013X	472781	487386	-	Y34D9A.10	chrI	1053894	1066899	-	Vacuolar protein sorting-associated protein 4A, partial
AgR013X_g034_t02	AgR013X	477711	482856	+	Y34D9A.2	chrI	1062293	1065269	+	vacuolar protein sorting-associated protein 4b
AgR013X_g037_t01	AgR013X	547960	557169	-	T06D10.1	chrI	9070850	9075077	-	cre-rsbp-1 protein
AgR013X_g038_t04	AgR013X	561232	588065	+	W10D5.1	chrI	9095957	9100862	+	myocyte-specific enhancer factor 2c
AgR013X_g039_t01	AgR013X	578046	602343	-	W10D5.3a	chrI	9101324	9107939	-	E3 SUMO-protein ligase gei-17
AgR013X_g040_t02	AgR013X	604500	618908	-	ZK858.4a	chrI	9132538	9135753	+	pap-associated domain-containing protein 5
AgR013X_g042_t01	AgR013X	625133	637081	-	Y63D3A.6a	chrI	14104429	14113179	-	Translocation protein SEC63
AgR013X_g043_t06	AgR013X	666640	680209	+	Y106G6D.7	chrI	10122459	10130215	+	RNA-binding protein 12
AgR013X_g045_t04	AgR013X	741066	752758	+	M01E11.7a	chrI	5583407	5607529	-	Tensin
AgR013X_g049_t05	AgR013X	770381	775451	-	Y37E3.8a	chrI	2069681	2070607	-	60S ribosomal protein L27a
AgR013X_g051_t01	AgR013X	776632	789142	+	Y37E3.10a	chrI	2072680	2076906	+	Eukaryotic translation initiation factor 2 subunit 1
AgR013X_g054_t01	AgR013X	801338	807589	+	Y65B4BR.6a	chrI	572177	575120	-	cre-grl-16 protein
AgR013X_g055_t04	AgR013X	808648	841006	-	D2085.1	chrII	8651109	8658808	+	cad protein
AgR013X_g056_t01	AgR013X	847723	862166	-	C01H6.2	chrI	7204541	7207717	-	Ankyrin repeat and SAM domain-containing protein 6
AgR013X_g057_t01	AgR013X	865360	876822	+	M04C9.5a	chrI	9359075	9362926	+	Cell division protein kinase 7
AgR013X_g058_t03	AgR013X	875787	916143	-	F16A11.3a	chrI	9364175	9389633	-	Serine/threonine-protein phosphatase 4 regulatory subunit 1
AgR013X_g060_t01	AgR013X	919276	937751	+	Y60A3A.7	chrV	19955453	19958912	+	Abhydrolase domain-containing protein 2-A
AgR013X_g061_t06	AgR013X	954150	978902	+	B0207.12a	chrI	5970295	5973320	-	glutamate-gated chloride channel
AgR013X_g062_t01	AgR013X	980290	994719	+	ZK265.1a	chrI	8226509	8240637	-	Krev interaction trapped protein 1
AgR013X_g063_t02	AgR013X	1005754	1016423	-	F54C1.2	chrI	5003351	5004933	+	protein dom-3
AgR013X_g064_t01	AgR013X	1025451	1032452	-	R13A1.8	chrIV	7218049	7219485	-	cre-glb-23 protein
AgR013X_g065_t01	AgR013X	1056785	1083666	-	F56A11.1	chrIV	572723	583577	+	cytoplasmic fmr1-interacting protein-like protein
AgR013X_g067_t03	AgR013X	1118229	1158331	+	C32F10.8a	chrI	5823081	5826147	-	Alanine aminotransferase 2, partial
AgR013X_g068_t04	AgR013X	1154200	1177851	-	T12F5.4	chrI	3713142	3721157	-	Histone-lysine N-methyltransferase lin-59
AgR013X_g072_t02	AgR013X	1195771	1205880	+	C25A1.4	chrI	10169639	10172645	-	myelin expression factor 2
AgR013X_g074_t01	AgR013X	1230999	1245960	+	F26E4.11	chrI	9793756	9796675	+	E3 ubiquitin-protein ligase AMFR
AgR013X_g075_t03	AgR013X	1245714	1256872	-	R06C7.6	chrI	7246075	7246811	-	Glutamine amidohydrolase
AgR013X_g076_t01	AgR013X	1261040	1276478	-	H25P06.1	chrI	11311516	11323110	-	Hexokinase-1
AgR013X_g078_t04	AgR013X	1310322	1314895	+	Y71F9B.6a	chrI	2722519	2726724	-	CDK5 and ABL1 enzyme substrate 1
AgR013X_g079_t01	AgR013X	1310318	1322985	-	C01A2.2a	chrI	13397270	13398529	+	hypothetical protein
AgR013X_g080_t02	AgR013X	1345756	1384195	-	K03D10.1	chrI	14128594	14142207	-	anosmin-1
AgR013X_g081_t02	AgR013X	1399017	1408321	+	F49D11.9	chrI	10933810	10935712	-	Glycolipid transfer protein domain-containing protein 1
AgR013X_g082_t02	AgR013X	1420457	1518051	+	T21E3.3	chrI	3935272	3953991	-	low-density lipoprotein receptor-related protein 1
AgR013X_g083_t01	AgR013X	1520608	1524527	+	F49D11.8	chrI	10924240	10925753	-	myophilin
AgR013X_g084_t01	AgR013X	1527941	1539451	-	R119.6	chrI	382648	388564	+	Transcription initiation factor TFIID subunit 4
AgR013X_g085_t01	AgR013X	1547505	1567344	+	R119.4	chrI	379071	381902	-	Ubiquitin-associated protein 2
AgR013X_g087_t03	AgR013X	1576870	1584490	+	R119.2	chrI	368370	373445	-	putative xaa-pro aminopeptidase 3
AgR013X_g089_t01	AgR013X	1591438	1597918	+	F57B10.8	chrI	6548644	6550447	-	Activator of basal transcription 1
AgR013X_g090_t01	AgR013X	1604303	1611217	+	F33H2.8a	chrI	15031145	15033039	-	sac3 ganp family protein
AgR013X_g091_t02	AgR013X	1623160	1641693	+	F08B6.4a	chrI	6761228	6767797	-	Calponin
AgR013X_g097_t04	AgR013X	1700470	1727707	+	F47G6.4a	chrI	1446497	1465358	+	Myosin-VI
AgR013X_g099_t03	AgR013X	1748760	1764396	-	M01E11.2	chrI	5579666	5581979	+	Beta-catenin-like protein 1
AgR013X_g100_t02	AgR013X	1767845	1793242	-	F16D3.4	chrI	8363954	8369917	-	Tubulin-specific chaperone D
AgR013X_g102_t01	AgR013X	1801678	1805288	-	F10G8.7	chrI	10030174	10046760	+	DNA excision repair protein ERCC-1
AgR013X_g103_t01	AgR013X	1814487	1816496	+	F10G8.5	chrI	10033461	10034816	-	Neuronal calcium sensor 2
AgR013X_g107_t01	AgR013X	1868388	1885258	-	Y47H9C.5a	chrI	11877803	11887278	+	DnaJ subfamily C member 10
AgR013X_g110_t01	AgR013X	1887981	1891058	+	F53F10.8	chrI	3828239	3828900	+	transmembrane protein
AgR013X_g114_t01	AgR013X	1901240	1920159	+	Y18D10A.3	chrI	12809999	12815641	-	apolipoprotein a-i-binding protein
AgR013X_g115_t04	AgR013X	1927962	1994782	+	T08G11.1a	chrI	8905644	8916805	-	Vacuolar protein sorting-associated protein 13A
AgR013X_g117_t02	AgR013X	2012532	2016695	+	W06D4.6	chrI	9065087	9070264	+	DNA repair and recombination protein RAD54-like protein, partial
AgR013X_g118_t01	AgR013X	2017460	2025876	+	C43E11.4	chrI	4247754	4249415	+	elongation factor tu
AgR013X_g119_t01	AgR013X	2027263	2034667	+	C43E11.11	chrI	4249482	4253144	+	putative oligomeric golgi complex subunit 5
AgR013X_g120_t01	AgR013X	2045625	2065065	+	C43E11.3a	chrI	4254380	4264699	+	Histone-lysine N-methyltransferase SETD2
AgR013X_g122_t03	AgR013X	2086154	2094389	+	F22D6.4	chrI	7090623	7091371	+	putative nadh dehydrogenase iron-sulfur protein
AgR013X_g128_t02	AgR013X	2141530	2164518	-	Y105E8A.10a	chrI	14418197	14431806	+	Non-lysosomal glucosylceramidase
AgR013X_g130_t01	AgR013X	2166552	2186328	-	Y105E8A.9	chrI	14406028	14417942	+	AP-1 complex subunit gamma-1
AgR013X_g133_t05	AgR013X	2273710	2285036	+	R13H8.1a	chrI	10771457	10776700	+	Forkhead box protein O
AgR013X_g136_t01	AgR013X	2302078	2334208	+	T01C8.1a	chrX	16796087	16803357	+	5'-AMP-activated protein kinase catalytic subunit alpha-2
AgR013X_g137_t01	AgR013X	2342398	2351058	+	ZC434.2	chrI	10330879	10331808	+	40s ribosomal protein s7
AgR013X_g138_t04	AgR013X	2365638	2376668	+	H06O01.3a	chrI	7005443	7009190	+	SEC14-like protein 2
AgR013X_g140_t01	AgR013X	2376975	2382519	-	F29C4.2	chrIV	126731	127640	+	hypothetical protein
AgR013X_g141_t06	AgR013X	2388372	2394791	+	B0207.6	chrI	5935370	5936957	-	gpn-loop gtpase 2
AgR013X_g142_t07	AgR013X	2395962	2422305	+	Y71G12B.20a	chrI	1644588	1651394	-	Semaphorin-2A
AgR013X_g143_t01	AgR013X	2422610	2428396	+	R12E2.8	chrI	4155542	4158733	-	Galaxin
AgR013X_g148_t02	AgR013X	2509076	2515626	+	T03F1.12	chrI	3875974	3876711	-	Protein SYS1
AgR013X_g149_t02	AgR013X	2514593	2525023	-	T03F1.1	chrI	3874037	3875991	+	Ubiquitin-like modifier-activating enzyme 5
AgR013X_g150_t01	AgR013X	2527635	2543148	+	Y48B6A.1	chrII	14151040	14154373	-	Ribosome biogenesis protein BOP1
AgR013X_g151_t02	AgR013X	2539221	2555519	-	C34G6.6a	chrI	5874422	5878954	-	Ribosome biogenesis protein BOP1
AgR013X_g153_t03	AgR013X	2573112	2589520	-	ZK1067.6a	chrII	9178514	9188480	-	RNA-binding protein sym-2, partial
AgR013X_g157_t05	AgR013X	2695790	2721142	+	K03E5.1	chrI	3427177	3433207	+	Zinc transporter ZIP3
AgR013X_g158_t01	AgR013X	2704442	2726689	-	F55F8.9a	chrI	5669968	5673352	-	Zinc transporter ZIP3
AgR013X_g161_t01	AgR013X	2782017	2792193	+	W02D3.3	chrI	6724917	6728330	+	Mechanosensory abnormality protein 6
AgR013X_g163_t01	AgR013X	2800223	2846535	-	ZK337.2	chrI	14975419	14980586	+	Early growth response protein 1
AgR013X_g166_t02	AgR013X	2879541	2903089	+	F39B2.4a	chrI	14777139	14787804	-	Mediator of RNA polymerase II transcription subunit 23
AgR013X_g167_t01	AgR013X	2907752	2911675	+	F39B2.5	chrI	14775184	14776663	-	Suppressor of cytokine signaling 7
AgR013X_g168_t01	AgR013X	2912150	2925377	+	F39B2.7	chrI	14770689	14775007	-	tRNA modification GTPase mnmE
AgR013X_g169_t01	AgR013X	2926360	2932666	+	Y106G6E.4	chrI	10221635	10222778	-	5-formyltetrahydrofolate cyclo-ligase
AgR013X_g170_t02	AgR013X	2940514	2960730	-	F36A2.9a	chrI	8816978	8821358	+	Phospholipase B1, membrane-associated
AgR013X_g172_t01	AgR013X	3002844	3007103	+	F28H1.2	chrI	3987842	3988699	+	myophilin
AgR013X_g174_t01	AgR013X	3025930	3041357	-	K10C3.2	chrI	9850020	9851791	-	camp-regulated phosphoprotein endosulfine conserved region containing protein
AgR013X_g175_t01	AgR013X	3059608	3068829	+	K10C3.4a	chrI	9853658	9863492	+	Transmembrane protein 98
AgR013X_g176_t05	AgR013X	3085723	3103933	-	F26E4.1	chrI	9754122	9757898	+	Serine/threonine-protein phosphatase 2A 55 kDa regulatory subunit B delta isoform
AgR013X_g178_t02	AgR013X	3115769	3126601	+	C09H6.3	chrI	8125801	8130091	+	Cohesin loading complex subunit SCC4
AgR013X_g179_t04	AgR013X	3159281	3181138	+	C49A1.10	chrI	14241898	14244452	-	hypothetical protein
AgR013X_g182_t01	AgR013X	3216165	3230818	+	C09D4.2	chrI	5491424	5493263	+	hypothetical protein
AgR013X_g185_t08	AgR013X	3261404	3283283	+	F58B3.5a	chrIV	11631941	11635487	-	Methionyl-tRNA synthetase
AgR013X_g187_t06	AgR013X	3334064	3346460	+	C10H11.9	chrI	4738171	4744321	-	Rho-associated protein kinase let-502
AgR013X_g190_t03	AgR013X	3377611	3398138	+	Y18H1A.3a	chrI	700274	715850	-	Ral GTPase-activating protein subunit alpha-1
AgR013X_g192_t04	AgR013X	3408194	3416984	-	F59D8.1	chrX	3567355	3572549	-	vitellogenin-6
AgR013X_g193_t01	AgR013X	3419393	3422937	+	Y18H1A.2	chrI	694982	698322	-	Leukocyte receptor cluster member 1
AgR013X_g196_t02	AgR013X	3434674	3448178	-	T09B4.9	chrI	6177983	6180840	-	Import inner membrane translocase subunit tim-44
AgR013X_g197_t01	AgR013X	3450876	3475315	+	K10C3.5a	chrI	9863590	9869055	+	Ribosome assembly protein 1
AgR013X_g199_t01	AgR013X	3477682	3495816	-	Y47G6A.32	chrI	3620582	3625087	+	hypothetical protein
AgR013X_g203_t01	AgR013X	3530503	3543806	-	B0252.2	chrII	6910031	6912697	+	Sphingomyelin phosphodiesterase 1
AgR013X_g204_t03	AgR013X	3545416	3568367	+	B0252.3a	chrII	6902853	6907501	-	Transporter, partial
AgR013X_g206_t01	AgR013X	3597726	3605247	-	Y48C3A.18a	chrII	13412635	13414906	+	YrdC domain-containing protein
AgR013X_g209_t04	AgR013X	3645559	3677536	-	T08B2.5a	chrI	6215775	6219909	+	RNA-binding protein 10
AgR013X_g210_t02	AgR013X	3681191	3699238	+	ZK524.3a	chrI	7457153	7460756	-	Leucyl-tRNA synthetase
AgR013X_g211_t01	AgR013X	3702207	3715429	+	Y105E8B.2a	chrI	14634628	14642653	-	Exocyst complex component 8
AgR013X_g215_t02	AgR013X	3768733	3772654	+	C37A2.6	chrI	6788032	6789002	-	methyltransferase-like protein 20-like protein
AgR013X_g220_t05	AgR013X	3854391	3873574	-	T23G7.4	chrII	9173175	9177152	-	Exocyst complex component 2
AgR013X_g223_t03	AgR013X	3895460	3904270	-	C37A2.7	chrI	6789039	6789738	-	60S acidic ribosomal protein P2
AgR013X_g228_t01	AgR013X	3956088	3964930	+	F35C12.3a	chrI	9813040	9815897	-	hypothetical protein
AgR013X_g230_t01	AgR013X	3981183	3987415	-	C30F12.3	chrI	6970367	6971879	-	hypothetical protein
AgR013X_g231_t05	AgR013X	4014968	4045343	+	ZK524.4	chrI	7460858	7466424	-	SNF-related serine/threonine-protein kinase
AgR013X_g233_t01	AgR013X	4067075	4077629	-	K07C5.5a	chrV	10356285	10357903	-	Epoxide hydrolase 4
AgR013X_g235_t04	AgR013X	4094542	4108043	+	K05C4.6a	chrI	14738882	14742657	+	Protein humpback-2
AgR013X_g238_t02	AgR013X	4154015	4163935	+	T19B4.3	chrI	5678638	5679862	+	adenine phosphoribosyltransferase
AgR013X_g243_t02	AgR013X	4207835	4217438	+	C26C6.5a	chrI	7536204	7542157	-	Transcriptional repressor p66-alpha
AgR013X_g244_t01	AgR013X	4213123	4237357	-	C53C11.3	chrX	17318584	17326603	+	Patched domain-containing protein 3
AgR013X_g246_t06	AgR013X	4286018	4325338	-	C06A5.3a	chrI	5986492	5990581	+	hepatoma-derived growth factor
AgR013X_g253_t02	AgR013X	4424127	4434995	-	W05B5.1a	chrI	13033483	13045432	+	hypothetical protein
AgR013X_g259_t03	AgR013X	4530558	4548224	-	F38G1.1	chrX	481378	486504	+	Intraflagellar transport protein 80, partial
AgR013X_g260_t02	AgR013X	4562603	4577492	+	F35A5.8a	chrX	3800045	3802771	-	Endophilin-B1
AgR013X_g262_t01	AgR013X	4609663	4622582	+	F29A7.4	chrII	2748588	2751573	+	CB1 cannabinoid receptor-interacting protein 1
AgR014X_g003_t03	AgR014X	20074	43030	+	W08D2.5a	chrIV	9817412	9824632	-	Cation-transporting ATPase, partial
AgR014X_g007_t02	AgR014X	72601	90741	-	F27C8.1	chrIV	9598986	9601695	-	Y+L amino acid transporter 2
AgR014X_g008_t04	AgR014X	107746	119688	+	F52H2.4	chrX	2543391	2548028	-	Sodium-coupled monocarboxylate transporter 1, partial
AgR014X_g009_t01	AgR014X	123416	159804	-	F32H2.5	chrI	8975384	8986534	-	Fatty acid synthase
AgR014X_g015_t02	AgR014X	239644	242555	+	F35H12.6	chrX	913290	914853	+	hypothetical protein
AgR014X_g018_t01	AgR014X	266740	290593	+	Y49A3A.2	chrV	14351711	14354281	+	V-type proton ATPase catalytic subunit A
AgR014X_g019_t01	AgR014X	272409	282809	-	ZC13.2	chrX	880629	883049	+	V-type proton ATPase catalytic subunit A
AgR014X_g020_t02	AgR014X	285859	290084	-	ZK813.5	chrX	3448744	3451222	-	Melanin-concentrating hormone receptor 2
AgR014X_g025_t03	AgR014X	338495	346314	-	Y54H5A.3	chrIII	5151907	5153229	-	rna-binding protein 42
AgR014X_g026_t03	AgR014X	347863	359364	+	F32B6.8a	chrIV	9899012	9902513	+	tbc1 domain family member 22b
AgR014X_g028_t04	AgR014X	382741	393787	+	C28C12.10a	chrIV	8503493	8510511	-	FYVE, RhoGEF and PH domain-containing protein 6
AgR014X_g030_t02	AgR014X	435755	440348	-	T21D12.12	chrIV	266448	268322	+	Uncharacterized protein ZC84.1
AgR014X_g031_t02	AgR014X	448265	461489	-	F53H1.3a	chrIV	1329162	1339376	+	Protein FAM116B
AgR014X_g032_t01	AgR014X	466480	484056	-	T25C12.1a	chrX	11465557	11484368	+	protein lin-14
AgR014X_g034_t01	AgR014X	504094	509035	-	F48C5.2	chrX	11451617	11454195	-	hypothetical protein
AgR014X_g036_t02	AgR014X	513841	538900	-	C26D10.6a	chrII	8350535	8354700	-	hypothetical protein
AgR014X_g038_t01	AgR014X	570055	582269	+	F31E8.2a	chrII	6810963	6816443	+	synaptotagmin-1
AgR014X_g042_t01	AgR014X	663884	669650	+	C53B7.4	chrX	6841258	6842129	+	ATP synthase subunit g 2
AgR014X_g044_t01	AgR014X	676415	692416	+	C09E8.1a	chrII	556485	564215	+	putative atp synthase subunit g
AgR014X_g047_t01	AgR014X	723703	729428	+	F45H10.3	chrII	13493181	13494600	-	Transcription termination factor 2, partial
AgR014X_g049_t01	AgR014X	730701	733870	+	R07E4.3	chrX	5953450	5953815	+	Cytochrome b-c1 complex subunit 8
AgR014X_g050_t01	AgR014X	744558	749746	+	W08F4.6	chrII	569236	572110	-	cre-mlt-8 protein
AgR014X_g051_t02	AgR014X	750025	758500	+	Y54E10A.7	chrI	3162813	3163649	+	39S ribosomal protein L17
AgR014X_g052_t02	AgR014X	758010	767250	-	R07G3.7a	chrII	7610986	7613730	-	39S ribosomal protein L17
AgR014X_g053_t01	AgR014X	765241	769306	+	R07G3.9	chrII	7613541	7614434	+	immunoglobulin i-set domain containing protein
AgR014X_g054_t02	AgR014X	772626	788419	+	R07G3.1	chrII	7616452	7618245	+	Ras-related C3 botulinum toxin substrate 1
AgR014X_g055_t02	AgR014X	797095	807690	+	F40H3.1a	chrII	6179867	6184684	+	filamin a-interacting protein 1-like protein
AgR014X_g056_t05	AgR014X	804941	824522	-	C27H5.2a	chrII	7155581	7160950	+	filamin a-interacting protein 1-like protein
AgR014X_g060_t04	AgR014X	849864	862190	-	C42C1.10a	chrIV	12283174	12287752	+	Thiamine pyrophosphate carrier
AgR014X_g062_t01	AgR014X	891040	907848	-	F01E11.5a	chrX	6996873	7005575	-	Tyramine receptor ser-2
AgR014X_g066_t04	AgR014X	993928	1005438	+	F56B3.8a	chrIV	773228	776655	+	39S ribosomal protein L2
AgR014X_g068_t02	AgR014X	1029598	1044038	+	ZK1073.1	chrX	16124151	16128865	-	protein ndrg1
AgR014X_g070_t02	AgR014X	1062399	1076462	-	Y42H9AR.3a	chrIV	8104318	8107598	-	Rabenosyn-5
AgR014X_g073_t04	AgR014X	1083731	1103710	-	Y57G11C.17a	chrIV	14826449	14829115	-	Protein-cysteine N-palmitoyltransferase Rasp
AgR014X_g077_t08	AgR014X	1138156	1142093	-	K09B11.1a	chrIV	13416792	13421927	+	serine threonine-protein kinase pelle
AgR014X_g078_t03	AgR014X	1150845	1174921	-	Y41E3.1a	chrIV	14954206	14958914	-	serine threonine-protein kinase pelle
AgR014X_g079_t07	AgR014X	1175722	1197851	+	C34H4.5a	chrIV	1545300	1549890	-	hypothetical protein
AgR014X_g082_t10	AgR014X	1280981	1316689	+	F55H12.3	chrI	8876319	8893051	+	Neurogenic locus notch protein 1
AgR014X_g083_t02	AgR014X	1309573	1340973	-	C33D9.1a	chrIV	8799092	8804857	-	FYVE, RhoGEF and PH domain-containing protein 4
AgR014X_g085_t02	AgR014X	1402020	1419497	+	T23G5.2a	chrIII	9234765	9236322	-	CRAL-TRIO domain-containing protein, partial
AgR014X_g086_t06	AgR014X	1444970	1459828	+	H01G02.3a	chrIV	11783942	11792593	-	hypothetical protein
AgR014X_g087_t01	AgR014X	1461976	1482898	+	H06A10.1	chrX	13507564	13510094	+	DOMON domain-containing protein
AgR014X_g088_t02	AgR014X	1464697	1480007	-	F15A2.2	chrX	13472155	13475899	+	trehalase
AgR014X_g090_t02	AgR014X	1485026	1492608	-	Y4C6B.2a	chrIV	5340890	5344204	+	Lysine histidine transporter 1
AgR014X_g093_t02	AgR014X	1535468	1550834	-	T03G6.3	chrX	2610826	2615726	-	ectonucleotide pyrophosphatase phosphodiesterase family member 6
AgR014X_g095_t01	AgR014X	1579700	1590649	+	K01A12.3	chrX	8620570	8625240	-	putative g-protein coupled receptor
AgR014X_g097_t07	AgR014X	1632796	1637097	+	M03F4.3a	chrX	4948049	4955331	+	tyramine receptor family member (tyra-3)
AgR014X_g098_t01	AgR014X	1635774	1648676	-	F36G3.1	chrX	9780375	9789275	-	Uncharacterized protein F36G3.1
AgR014X_g099_t01	AgR014X	1657385	1679895	+	Y71H10A.2	chrX	2933361	2937730	+	Fatty acyl-CoA reductase
AgR014X_g100_t03	AgR014X	1677255	1710800	-	B0432.3	chrII	288939	290391	+	39S ribosomal protein L41
AgR014X_g101_t02	AgR014X	1686006	1734807	+	F29G6.1	chrX	11502267	11509432	+	agrin
AgR014X_g104_t02	AgR014X	1736312	1744727	-	F29G6.2	chrX	11509446	11511451	-	Coiled-coil domain-containing protein 149, partial
AgR014X_g107_t01	AgR014X	1760159	1768422	-	JC8.7a	chrIV	13247261	13250699	+	putative gene 48 protein
AgR014X_g110_t01	AgR014X	1785339	1792860	-	R10D12.12	chrV	13961265	13961977	-	UDP-N-acetylglucosamine transferase subunit ALG13
AgR014X_g114_t02	AgR014X	1847092	1859415	-	T11G6.1a	chrIV	10858957	10861284	+	Histidyl-tRNA synthetase
AgR014X_g115_t05	AgR014X	1919365	1959180	+	K01A6.2a	chrIV	11715039	11729276	+	Membrane-associated guanylate kinase, WW and PDZ domain-containing protein 1
AgR014X_g116_t03	AgR014X	1966067	1991262	-	F09C8.2	chrX	16140507	16147022	-	Growth inhibition and differentiation-related protein 88
AgR014X_g120_t04	AgR014X	2014323	2041061	-	F21G4.2	chrX	9884278	9889704	+	Multidrug resistance-associated protein 1
AgR014X_g128_t02	AgR014X	2106003	2131096	+	T07C12.8a	chrV	9952699	9956883	+	neprilysin-1
AgR014X_g130_t03	AgR014X	2129236	2140161	-	C36B7.6	chrX	7097434	7100338	-	Cleft lip and palate transmembrane protein 1
AgR014X_g133_t01	AgR014X	2167012	2172763	-	C15A7.2	chrX	12070743	12073863	-	transmembrane protein
AgR014X_g148_t03	AgR014X	2481993	2490033	+	F54E4.4	chrX	14641391	14645486	-	tyrosinase-like protein tyr-3
AgR014X_g149_t01	AgR014X	2490566	2502562	-	K06H7.4	chrIII	8085705	8088449	+	Cytohesin-1
AgR014X_g152_t02	AgR014X	2517704	2543018	-	ZK287.1a	chrV	9666700	9670050	+	hypothetical protein
AgR014X_g155_t04	AgR014X	2565724	2623052	+	F49E10.5a	chrX	5862708	5873320	+	c-terminal-binding protein
AgR014X_g157_t04	AgR014X	2637463	2640433	+	R03E9.1	chrX	6742351	6743899	+	helix-loop-helix dna-binding domain containing protein
AgR014X_g159_t01	AgR014X	2653504	2659337	+	F18G5.2	chrX	9251818	9255717	+	cre-pes-8 protein
AgR014X_g160_t01	AgR014X	2662899	2665196	+	Y67D8C.22a	chrIV	3070134	3076307	-	hypothetical protein
AgR014X_g161_t07	AgR014X	2718551	2729906	+	B0198.1	chrX	12031598	12034037	-	CD151 antigen
AgR014X_g162_t03	AgR014X	2731930	2744038	-	F43C9.2	chrX	4786118	4790323	+	Calmodulin
AgR014X_g163_t02	AgR014X	2761695	2781271	-	C33A11.4a	chrX	15369974	15377685	-	ETSous factor
AgR014X_g165_t05	AgR014X	2801350	2813158	+	C33A11.2	chrX	15365994	15369999	+	dna damage-regulated autophagy modulator protein 2
AgR014X_g167_t01	AgR014X	2836498	2848441	-	Y71H10A.1a	chrX	2940872	2945481	+	6-phosphofructokinase
AgR014X_g168_t02	AgR014X	2856290	2869366	+	F52E4.7	chrX	3095434	3099837	-	exocyst complex component 1
AgR014X_g170_t01	AgR014X	2872071	2887338	+	B0310.1a	chrX	493964	497510	+	Uncharacterized protein B0310.1
AgR014X_g171_t01	AgR014X	2888300	2895279	-	F38G1.2	chrX	489695	492273	+	Fibroblast growth factor 17
AgR014X_g173_t01	AgR014X	2945340	2949140	-	F38G1.3	chrX	476561	478283	+	fmrfamide receptor
AgR014X_g174_t01	AgR014X	2976021	2985624	+	B0410.2a	chrX	2885863	2890625	+	vang-like protein 1
AgR014X_g177_t08	AgR014X	3012864	3041249	+	H19N07.2a	chrV	11113914	11118818	+	Ubiquitin carboxyl-terminal hydrolase 7
AgR014X_g178_t11	AgR014X	3054437	3061378	+	W04G3.2	chrX	11062132	11064539	+	cre-lpr-6 protein
AgR014X_g179_t01	AgR014X	3065380	3076120	+	W04G3.3	chrX	11065133	11066811	+	ocalin-related protein family member (lpr-4)
AgR014X_g181_t02	AgR014X	3102764	3115880	+	W04G3.4	chrX	11068527	11071925	+	adp-ribosylation factor-binding protein gga3
AgR014X_g185_t03	AgR014X	3196477	3205790	-	Y48B6A.14	chrII	14250683	14251448	+	fact complex subunit ssrp1-a
AgR014X_g186_t04	AgR014X	3208873	3227108	+	C17G10.1	chrII	5596547	5598449	+	2-oxoglutarate and iron-dependent oxygenase domain-containing protein 1
AgR014X_g188_t04	AgR014X	3295496	3303280	+	F32A5.7	chrII	7252232	7253222	-	U6 snRNA-associated Sm-like protein LSm4
AgR014X_g189_t04	AgR014X	3328465	3349016	+	R06F6.6	chrII	10805739	10808523	+	Homeobox protein, partial
AgR014X_g190_t03	AgR014X	3350707	3360677	+	E02H1.3	chrII	9591292	9592936	+	tRNA pseudouridine synthase tag-124
AgR014X_g191_t01	AgR014X	3361756	3368551	+	R02D3.5	chrIV	237591	240307	-	Protein farnesyltransferase/geranylgeranyltransferase type-1 subunit alpha
AgR014X_g192_t03	AgR014X	3368797	3383900	+	E02H1.5	chrII	9595224	9596598	+	Adenylate kinase isoenzyme 6 homolog
AgR014X_g193_t01	AgR014X	3384420	3389787	+	E02H1.8	chrII	9597622	9598201	+	hypothetical protein
AgR014X_g194_t01	AgR014X	3441189	3511544	+	F53A10.2a	chrII	1197374	1230782	+	Rap1 GTPase-activating protein 1
AgR014X_g199_t01	AgR014X	3644206	3656506	-	T28F2.3	chrI	3629471	3631112	+	Carbonic anhydrase 3
AgR014X_g200_t02	AgR014X	3676917	3701672	-	F52B5.1a	chrI	8296927	8307566	-	Sodium-driven chloride bicarbonate exchanger
AgR014X_g201_t02	AgR014X	3725059	3729213	+	Y54E5B.4	chrI	14822050	14823996	+	Ubiquitin-conjugating enzyme E2 W
AgR014X_g205_t01	AgR014X	3772310	3790009	-	W03F11.6a	chrI	2160042	2209629	+	Afadin
AgR014X_g207_t02	AgR014X	3810368	3817372	-	C30F12.1	chrI	6954414	6961139	-	Ribonuclease ZC3H12A
AgR014X_g208_t20	AgR014X	3831594	3834559	-	R04B3.2	chrX	2471540	2473718	-	N(4)-(Beta-N-acetylglucosaminyl)-L-asparaginase
AgR014X_g210_t03	AgR014X	3861704	3877226	-	Y105E8B.8a	chrI	14664449	14674796	+	Endoplasmic oxidoreductin-1
AgR014X_g212_t02	AgR014X	3900727	3992395	-	F55C7.7a	chrI	3999348	4031739	-	Kalirin
AgR014X_g216_t03	AgR014X	4006395	4016764	-	Y54E10BL.6	chrI	3005403	3013448	-	Dual specificity mitogen-activated protein kinase kinase mek-2
AgR014X_g217_t01	AgR014X	4015388	4025816	+	T23D8.1a	chrI	9965580	9969413	+	frizzled-1
AgR014X_g218_t02	AgR014X	4025890	4036647	-	T23D8.2	chrI	9970037	9973177	-	CD63 antigen
AgR014X_g221_t02	AgR014X	4051104	4069022	+	F59A3.1	chrI	5520389	5529763	+	carboxypeptidase d
AgR014X_g222_t01	AgR014X	4073296	4084819	+	C01G8.2	chrI	5274693	5278708	-	battenin
AgR014X_g224_t08	AgR014X	4191413	4216011	+	ZK1151.1a	chrI	11764295	11792118	-	spectrin beta chain
AgR014X_g227_t01	AgR014X	4314899	4348817	+	K12C11.4a	chrI	1305562	1328348	+	death-associated protein kinase dapk-1
AgR014X_g229_t05	AgR014X	4409443	4428808	+	ZC84.4	chrIII	9208288	9215440	-	putative g-protein coupled receptor
AgR014X_g232_t04	AgR014X	4476324	4503940	+	K11D9.2a	chrIII	10812300	10816844	-	calcium-transporting atpase sarcoplasmic endoplasmic reticulum type
AgR014X_g237_t10	AgR014X	4560448	4579424	-	C18B12.6	chrX	15004064	15007308	-	Endoplasmic reticulum-Golgi intermediate compartment protein 2
AgR014X_g238_t01	AgR014X	4581370	4590328	+	F01D4.4	chrIV	10478468	10481844	-	Carboxypeptidase E
AgR014X_g239_t07	AgR014X	4590036	4615229	-	F33D4.4	chrIV	7703874	7706905	-	sphingolipid delta -desaturase des1
AgR018X_g002_t07	AgR018X	15708	20366	+	C46H11.4a	chrI	5037391	5041149	+	Inositol-trisphosphate 3-kinase A
AgR018X_g004_t05	AgR018X	33506	45596	+	C26G2.1a	chrX	14654972	14662841	+	Nephrin
AgR018X_g005_t01	AgR018X	48418	50839	+	C26G2.2	chrX	14664289	14671300	+	hypothetical protein
AgR018X_g008_t02	AgR018X	59556	63139	-	F31F6.8	chrX	14876150	14878855	+	hypothetical protein
AgR018X_g013_t02	AgR018X	79248	96527	-	F40E10.4	chrX	14674328	14683326	+	Protein slit
AgR018X_g015_t02	AgR018X	124681	146064	+	R07E4.1a	chrX	5959115	5970158	+	Ankyrin repeat and fibronectin type-III domain-containing protein 1
AgR018X_g016_t03	AgR018X	139347	153018	-	R07E4.6a	chrX	5971013	5977838	-	CAMP-dependent protein kinase regulatory subunit
AgR018X_g019_t01	AgR018X	179611	190221	-	F47A4.1a	chrX	9801091	9807662	-	Ligand-gated ion channel 50
AgR018X_g020_t02	AgR018X	191402	203928	-	Y66H1B.4	chrIV	379898	383185	-	Sphingosine-1-phosphate lyase
AgR018X_g021_t02	AgR018X	206785	227387	+	H42K12.3	chrX	1311608	1316632	+	Uncharacterized protein F52C9.5
AgR018X_g022_t04	AgR018X	229941	250227	+	JC8.10a	chrIV	13261556	13272514	-	Synaptojanin-1
AgR018X_g024_t08	AgR018X	255041	288369	-	H06H21.10a	chrIV	4827853	4841127	-	Phospholipid-transporting ATPase ID
AgR018X_g027_t01	AgR018X	302243	306112	-	M18.2	chrIV	12110586	12111577	-	putative dynein light chain cytoplasmic
AgR018X_g032_t02	AgR018X	332497	383265	-	Y57A10A.18a	chrII	12209228	12221791	-	ubiquitin carboxyl-terminal hydrolase 7
AgR018X_g033_t03	AgR018X	394902	409879	-	C44H4.7a	chrX	14603065	14608654	+	proline-rich protein 12
AgR018X_g035_t01	AgR018X	424391	432452	+	C18B2.5a	chrX	3606668	3611092	-	hypothetical protein
AgR018X_g038_t01	AgR018X	451569	461251	-	F39D8.2a	chrX	15407931	15419290	+	Homeobox protein homothorax
AgR018X_g040_t01	AgR018X	487459	503596	+	T01C1.2	chrX	10719554	10722054	-	Mushroom body large-type Kenyon cell-specific protein 1
AgR018X_g046_t01	AgR018X	533466	550325	-	T24H7.2	chrII	6247311	6250841	+	Hypoxia up-regulated protein 1
AgR018X_g047_t01	AgR018X	551892	558671	+	C52G5.2	chrX	12843311	12845384	+	thap domain-containing protein 4
AgR018X_g049_t02	AgR018X	580358	608895	+	F15D4.1	chrII	13200165	13215701	+	Helicase mot1
AgR018X_g050_t02	AgR018X	609905	617653	+	JC8.12a	chrIV	13256051	13259076	+	udp-sugar transporter
AgR018X_g051_t06	AgR018X	640779	669368	+	F13E6.6	chrX	10697854	10711869	-	Rho guanine nucleotide exchange factor 12
AgR018X_g053_t01	AgR018X	671088	685270	+	M03A8.3	chrX	6800688	6803700	+	hypothetical protein
AgR018X_g054_t03	AgR018X	708109	725032	+	F39C12.2a	chrX	4854080	4860036	-	Adducin-related protein 1, partial
AgR018X_g055_t02	AgR018X	743702	747903	-	T07F12.4	chrX	4896602	4898163	-	Serine/threonine-protein kinase ULK2
AgR018X_g058_t02	AgR018X	781880	806290	+	K02E10.8a	chrX	2509741	2515317	-	Irregular chiasm C-roughest protein
AgR018X_g059_t04	AgR018X	806983	816220	-	F59B10.1	chrII	10496987	10502541	-	Myelin gene regulatory factor
AgR018X_g062_t01	AgR018X	843345	852431	-	K07H8.2a	chrIV	8291625	8294596	+	Solute carrier family 41 member 1
AgR018X_g069_t02	AgR018X	925164	942835	-	Y45F10D.3a	chrIV	13778866	13782361	+	Polypeptide N-acetylgalactosaminyltransferase 10
AgR018X_g070_t02	AgR018X	944209	950252	-	Y56A3A.13	chrIII	11923886	11929376	+	Nitrilase and fragile histidine triad fusion protein NitFhit
AgR018X_g071_t01	AgR018X	951736	954912	-	Y56A3A.22	chrIII	11921692	11923825	+	Protein FAM210A
AgR018X_g072_t01	AgR018X	963486	972484	-	W10D9.4a	chrII	461667	467365	-	Nuclear transcription factor Y subunit B-2, partial
AgR018X_g073_t04	AgR018X	1008545	1026576	-	T12G3.2a	chrIV	12038995	12043508	-	hypothetical protein
AgR018X_g074_t01	AgR018X	1032285	1039651	-	B0496.5	chrIV	7420958	7422671	+	serpentine class tx family member (srtx-1)
AgR018X_g075_t05	AgR018X	1043386	1055758	-	C39E6.6	chrX	4767178	4769985	-	Neuropeptide FF receptor 2
AgR018X_g076_t01	AgR018X	1060801	1065615	-	R05H5.3	chrII	10197625	10198324	+	nucleoredoxin-like protein 2
AgR018X_g077_t01	AgR018X	1070110	1074299	-	F29B9.6	chrIV	4651044	4652447	+	SUMO-conjugating enzyme UBC9
AgR018X_g081_t02	AgR018X	1105470	1117030	-	C16E9.2a	chrX	6935732	6939041	+	Uncharacterized protein KIAA0930
AgR018X_g083_t04	AgR018X	1118006	1128077	-	C18B2.6	chrX	3613353	3617378	-	Acid-sensing ion channel 1
AgR018X_g086_t01	AgR018X	1156675	1162543	+	F48D6.3	chrX	4249249	4250764	+	helix-loop-helix protein 13
AgR018X_g087_t01	AgR018X	1161289	1172076	-	M03F4.6	chrX	4964413	4969459	-	prion-like domain-bearing protein 25
AgR018X_g090_t01	AgR018X	1177742	1183964	+	F19C6.5	chrX	9982402	9985005	-	Uncharacterized protein F19C6.5
AgR018X_g092_t01	AgR018X	1196173	1203666	+	Y73F8A.5	chrIV	15259879	15269045	+	UPF0577 protein KIAA1324-like homolog
AgR018X_g096_t05	AgR018X	1255807	1273041	+	F09A5.4a	chrX	13152835	13158493	-	Mps one binder kinase activator-like protein 2
AgR018X_g097_t01	AgR018X	1284693	1293880	+	M03F4.7a	chrX	4970463	4972281	-	Calumenin-A
AgR018X_g098_t01	AgR018X	1295065	1302187	+	Y69A2AR.3	chrIV	2641310	2642113	+	hypothetical protein
AgR018X_g099_t03	AgR018X	1295656	1326631	-	F49E10.3	chrX	5885865	5886823	+	hypothetical protein
AgR018X_g100_t03	AgR018X	1330854	1350465	-	F49E10.4a	chrX	5875898	5881716	+	hypothetical protein
AgR018X_g102_t10	AgR018X	1398560	1417941	-	C14H10.2a	chrX	10242338	10251355	-	flagellar attachment zone protein 1
AgR018X_g103_t01	AgR018X	1439725	1443039	-	R09A8.4	chrX	12636153	12637056	-	Cuticle collagen 75, partial
AgR018X_g104_t03	AgR018X	1445694	1461280	+	W10C8.5	chrI	2853975	2855715	-	Arginine kinase F46H5.3
AgR018X_g106_t02	AgR018X	1459710	1467813	-	F22E10.5a	chrX	12762078	12765904	+	choline ethanolaminephosphotransferase 1
AgR018X_g107_t01	AgR018X	1491308	1506578	+	C48A7.2a	chrIV	7394097	7396726	+	Sodium-dependent phosphate transporter 1
AgR018X_g108_t01	AgR018X	1520208	1529567	+	T02D1.4	chrIV	17399776	17402336	+	hypothetical protein
AgR018X_g109_t05	AgR018X	1535656	1539896	-	Y9C12A.1	chrX	681129	682780	-	Tumor protein p53-inducible protein 11
AgR018X_g113_t02	AgR018X	1593380	1606363	+	B0564.9	chrIV	13136032	13138822	+	Innexin unc-7
AgR018X_g114_t01	AgR018X	1601601	1616072	-	C16E9.4a	chrX	6943740	6956399	-	innexin unc-7
AgR018X_g118_t01	AgR018X	1687038	1689366	-	F10D7.1	chrX	17359770	17364764	+	g-protein coupled octopamine
AgR018X_g119_t01	AgR018X	1716176	1724684	-	T22H6.1	chrX	12767463	12769797	-	hypothetical protein
AgR018X_g120_t04	AgR018X	1753313	1766035	-	F20D1.2	chrX	14970751	14974779	+	TBC1 domain family member 23
AgR018X_g121_t01	AgR018X	1773192	1785749	-	C29H12.1	chrII	6125559	6127942	+	Arginyl-tRNA synthetase
AgR018X_g122_t02	AgR018X	1795017	1802737	+	T25F10.3	chrV	6745039	6748609	+	egf-like domain containing protein
AgR018X_g129_t01	AgR018X	1878183	1897181	+	F54D7.3a	chrI	4800043	4804171	+	Forkhead box protein F1
AgR018X_g130_t03	AgR018X	1894213	1901477	-	F26B1.7	chrI	6320289	6324018	-	Forkhead box protein F1
AgR018X_g133_t01	AgR018X	1990709	2026348	-	Y105E8A.25a	chrI	14567169	14616523	-	Rho guanine nucleotide exchange factor 28
AgR018X_g135_t03	AgR018X	2048901	2057251	-	K11B4.1	chrI	14794899	14797166	+	protein mef2bnb-like protein
AgR018X_g137_t01	AgR018X	2067287	2082483	-	Y92H12BL.4	chrI	1376942	1385057	-	rho gtpase-activating protein 39
AgR018X_g139_t01	AgR018X	2084966	2092973	+	W08E3.2	chrI	13333380	13336146	-	Protein CASC3
AgR018X_g140_t02	AgR018X	2094969	2102656	-	F28H1.4a	chrI	3974111	3977262	-	synaptophysin synaptoporin family protein
AgR018X_g141_t01	AgR018X	2106346	2118042	+	F02E9.7	chrI	8413253	8416195	+	tartrate-resistant acid phosphatase type 5
AgR018X_g142_t01	AgR018X	2123682	2132768	+	ZK909.4	chrI	14961501	14965361	+	Cell death specification protein 2
AgR018X_g145_t02	AgR018X	2156239	2201928	-	F55A12.9a	chrI	5372854	5377481	-	Protein FAM46C
AgR018X_g149_t01	AgR018X	2210285	2213513	-	Y119C1B.9	chrI	4537449	4539725	-	hypothetical protein
AgR018X_g152_t02	AgR018X	2228680	2240544	-	C30H7.2a	chrI	5416657	5420731	-	thioredoxin domain-containing protein
AgR018X_g154_t01	AgR018X	2244795	2256376	+	Y18D10A.6a	chrI	12825664	12834143	+	Sodium/hydrogen exchanger 8
AgR018X_g156_t04	AgR018X	2271247	2285162	+	T23H2.4	chrI	6453875	6456984	-	hypothetical protein
AgR018X_g159_t01	AgR018X	2298597	2303685	+	M04C9.3a	chrI	9352885	9354541	-	Pyroglutamyl-peptidase 1
AgR018X_g160_t03	AgR018X	2330937	2346096	+	K04F10.4a	chrI	6342231	6350338	+	Endoprotease bli-4
AgR018X_g163_t02	AgR018X	2385342	2392409	+	M03A1.3	chrII	4557787	4559573	+	Ferric-chelate reductase 1
AgR018X_g164_t01	AgR018X	2393149	2400520	+	F30A10.8	chrI	9501268	9505164	+	Syntrophin-1
AgR018X_g165_t03	AgR018X	2406703	2414470	+	C47B2.5	chrI	12968921	12970238	+	Eukaryotic translation initiation factor 6
AgR018X_g166_t01	AgR018X	2414975	2418252	+	C47B2.8	chrI	12971120	12972347	+	cre-prx-11 protein
AgR018X_g167_t02	AgR018X	2420953	2429605	+	C47B2.6a	chrI	12975183	12978749	+	UDP-glucose 4-epimerase, partial
AgR018X_g168_t01	AgR018X	2433663	2436021	+	C47B2.7a	chrI	12978839	12982450	+	Selenocysteine-specific elongation factor
AgR018X_g169_t02	AgR018X	2436194	2450538	+	C47B2.9	chrI	12983020	12983974	+	s4 domain-containing protein
AgR018X_g170_t04	AgR018X	2458370	2465173	-	F37F2.2	chrI	1442048	1443942	-	putative signal recognition particle 19 kda protein
AgR018X_g171_t03	AgR018X	2466907	2477880	+	Y47G6A.9	chrI	3479329	3481439	+	Zinc finger protein 236
AgR018X_g172_t03	AgR018X	2473281	2493638	-	ZC328.2	chrI	6386149	6392524	-	Zinc finger protein 236
AgR018X_g178_t01	AgR018X	2595388	2615356	+	Y106G6H.1	chrI	10429629	10432336	+	neprilysin-2
AgR018X_g179_t01	AgR018X	2617342	2623772	-	W01A8.4	chrI	7068106	7069186	-	hypothetical protein
AgR018X_g184_t01	AgR018X	2679122	2696051	+	C34B2.5	chrI	10675167	10676811	-	Tetratricopeptide repeat protein 1
AgR018X_g188_t02	AgR018X	2705924	2727953	-	K06A1.1	chrII	6454974	6456440	+	Transcription factor AP-2-beta
AgR018X_g189_t04	AgR018X	2735697	2760662	+	T22C1.10a	chrI	7962052	7972443	+	Rab3 GTPase-activating protein regulatory subunit
AgR018X_g190_t02	AgR018X	2765299	2774313	+	Y71F9B.3	chrI	2730004	2731453	+	Receptor expression-enhancing protein 5
AgR018X_g192_t02	AgR018X	2784511	2788730	+	K07G5.2	chrI	7159714	7160917	+	DNA repair protein complementing XP-A cell
AgR018X_g193_t08	AgR018X	2792017	2827019	+	H12C20.2a	chrV	11566804	11570207	-	mismatch repair endonuclease pms2
AgR018X_g194_t01	AgR018X	2818214	2833065	-	C45B11.6	chrV	11044067	11045734	+	epoxide hydrolase 1
AgR018X_g196_t03	AgR018X	2864992	2878217	+	C09D4.1a	chrI	5497679	5505385	+	MFS-type transporter
AgR018X_g198_t01	AgR018X	2878997	2883883	+	B0511.1	chrI	10667808	10671301	+	Peptidyl-prolyl cis-trans isomerase FKBP14
AgR018X_g201_t01	AgR018X	2891263	2902582	-	R05D7.3a	chrI	12168238	12170125	-	hypothetical protein
AgR018X_g202_t07	AgR018X	2949465	2965814	-	F27C1.11	chrI	5433907	5443026	-	lipoxygenase-like proteiny domain-containing protein 1
AgR018X_g207_t03	AgR018X	3071631	3078640	-	D1007.6	chrI	4583873	4584505	-	40S ribosomal protein S10
AgR018X_g210_t02	AgR018X	3114074	3124656	-	Y47G6A.18	chrI	3509698	3512735	-	Golgi phosphoprotein 3
AgR018X_g214_t01	AgR018X	3152856	3161127	-	W04G3.5a	chrX	11073658	11076043	+	Phosphoribosyl pyrophosphate synthase-associated protein 2
AgR018X_g215_t01	AgR018X	3182576	3191820	-	T22C1.6	chrI	7942719	7945588	+	Alpha-taxilin
AgR018X_g216_t01	AgR018X	3193261	3201031	-	Y39G10AR.8	chrI	2313271	2316003	+	Eukaryotic translation initiation factor 2 subunit 3
AgR018X_g217_t01	AgR018X	3202680	3221259	+	Y110A7A.9a	chrI	5119223	5123985	+	wd repeat-containing protein 11
AgR018X_g218_t01	AgR018X	3223822	3233919	-	Y37E3.13a	chrI	2085673	2093822	-	Peroxidasin
AgR018X_g220_t03	AgR018X	3249518	3256723	+	T22C1.7	chrI	7946186	7951593	-	Junctophilin-3
AgR018X_g221_t02	AgR018X	3269352	3288196	-	Y37E3.17a	chrI	2128590	2145971	+	Dimethylglycine dehydrogenase
AgR018X_g222_t02	AgR018X	3299231	3322347	+	D2092.1a	chrI	6629717	6633491	-	multiple c2 and transmembrane domain-containing protein 1
AgR018X_g223_t02	AgR018X	3325427	3343632	-	T05F1.6	chrI	9626241	9630848	+	Tumor suppressor p53-binding protein 1
AgR018X_g224_t01	AgR018X	3352113	3357670	-	Y71G12A.3a	chrI	1874033	1883639	+	Tubby-related protein 4
AgR018X_g225_t03	AgR018X	3383934	3400445	-	M01D7.2a	chrI	1862607	1872306	-	Secretory carrier-associated membrane protein 3
AgR018X_g226_t01	AgR018X	3401140	3416652	-	K01A11.4a	chrIII	3439023	3444207	-	Transient-receptor-potential-like protein
AgR018X_g227_t01	AgR018X	3421823	3430582	-	B0205.6	chrI	10736697	10739911	+	Cysteine desulfurase
AgR018X_g228_t01	AgR018X	3433304	3440281	+	B0205.7	chrI	10734022	10736615	+	Casein kinase II subunit alpha
AgR018X_g229_t07	AgR018X	3444075	3458685	-	K02F2.1a	chrI	6838354	6843343	+	Dipeptidyl peptidase 8
AgR018X_g230_t01	AgR018X	3462261	3465816	+	R06C1.4	chrI	11930704	11931757	+	cleavage stimulation factor subunit 2
AgR018X_g233_t01	AgR018X	3476057	3484379	+	Y18H1A.13	chrI	741913	745570	-	cuticle collagen dpy-13
AgR018X_g235_t01	AgR018X	3501491	3509654	+	T16H5.1a	chrI	2451908	2463461	-	innexin-19
AgR018X_g236_t03	AgR018X	3520625	3533132	-	T21G5.5a	chrI	6879405	6883112	-	Protein held out wings, partial
AgR018X_g238_t03	AgR018X	3565454	3577741	+	F57B10.7	chrI	6554729	6558623	+	Trehalase
AgR018X_g239_t01	AgR018X	3580621	3589269	+	C04F12.10	chrI	9711064	9712719	-	CAAX prenyl protease 1
AgR018X_g240_t04	AgR018X	3589483	3640735	-	Y54E5B.1a	chrI	14807468	14815714	+	Semaphorin-1A
AgR018X_g242_t02	AgR018X	3655442	3669412	-	T05F1.1a	chrI	9620233	9622370	+	nicalin-1
AgR018X_g243_t01	AgR018X	3672692	3687563	+	K07A1.8	chrI	9609502	9611620	-	protein ergic-53
AgR018X_g244_t03	AgR018X	3686568	3692896	-	R06C1.2	chrI	11917834	11923915	-	Farnesyl pyrophosphate synthase
AgR018X_g245_t02	AgR018X	3693761	3700492	-	R06C1.3a	chrI	11924785	11929511	-	wiskott-aldrich syndrome protein family member 1
AgR018X_g246_t01	AgR018X	3700089	3706525	+	Y71A12C.2	chrI	14046234	14048017	-	transmembrane protein 41a
AgR018X_g247_t01	AgR018X	3717943	3727209	+	F56F4.5	chrI	6133245	6137978	+	peptide transporter 3
AgR018X_g248_t03	AgR018X	3733446	3742140	+	W01A8.6	chrI	7070649	7074733	-	carboxypeptidase a2
AgR018X_g249_t05	AgR018X	3754633	3816946	+	F28B3.4a	chrI	4934118	4949307	+	Disco-interacting protein 2 C
AgR018X_g254_t01	AgR018X	3931637	3939284	+	D2013.10	chrII	9323955	9324873	+	Transmembrane protein 41
AgR018X_g255_t01	AgR018X	3939361	3954675	-	H01M10.1	chrX	2578211	2580574	-	hypothetical protein
AgR018X_g263_t01	AgR018X	3999529	4021371	-	M162.5	chrV	19761051	19766763	+	Sialin
AgR018X_g265_t01	AgR018X	4025159	4052928	-	Y71A12B.4	chrI	13899085	13913854	+	Ankyrin-3
AgR019X_g004_t03	AgR019X	6927	17171	-	K05C4.2	chrI	14720588	14721355	-	protein jagunal-like protein
AgR019X_g005_t02	AgR019X	18623	37847	+	F30A10.3	chrI	9492630	9494589	-	Inositol hexakisphosphate kinase 1
AgR019X_g006_t01	AgR019X	38127	46589	-	Y47G6A.7a	chrI	3502738	3508421	+	Solute carrier family 35 member C2
AgR019X_g011_t05	AgR019X	138114	178593	+	T23D8.4	chrI	9976501	9979662	-	Eukaryotic translation initiation factor 3 subunit C
AgR019X_g015_t01	AgR019X	265977	289807	+	ZK858.5	chrI	9135764	9138361	-	TM2 domain-containing protein, partial
AgR019X_g020_t01	AgR019X	348591	358213	+	T26E3.2	chrI	12679207	12681816	+	Putative nudix hydrolase 1
AgR019X_g022_t02	AgR019X	372662	379621	+	Y34D9B.1a	chrI	948569	957404	-	Frizzled-4
AgR019X_g024_t03	AgR019X	393845	429675	+	Y18D10A.13	chrI	12878595	12902806	+	protein pad-1
AgR019X_g028_t03	AgR019X	453205	499395	-	C32E12.5	chrI	5204540	5215218	-	Transcription factor SOX-14
AgR019X_g030_t05	AgR019X	574637	610702	-	Y75B8A.22	chrIII	12240403	12250164	-	Protein timeless
AgR019X_g033_t01	AgR019X	649438	669967	+	K04G2.2	chrI	8030959	8032886	+	Abhydrolase domain-containing protein
AgR019X_g037_t01	AgR019X	690404	733669	+	F07C3.7	chrV	9244402	9246360	-	large neutral amino acids transporter small subunit 1
AgR019X_g038_t04	AgR019X	714211	741971	+	F52A8.2a	chrI	7318290	7321085	-	Guanine nucleotide-binding protein subunit beta-2
AgR019X_g039_t02	AgR019X	749571	773612	-	F55A12.3	chrI	5358522	5365170	+	Phosphatidylinositol-4-phosphate 5-kinase type-1 alpha
AgR019X_g044_t01	AgR019X	788079	802822	+	T23H2.2	chrI	6436058	6441192	+	synaptotagmin-11
AgR019X_g045_t02	AgR019X	803151	812027	-	Y40B1A.4	chrI	13360401	13366888	-	Transcription factor Sp4
AgR019X_g047_t01	AgR019X	812378	826640	-	W08E3.3a	chrI	13340334	13343940	+	GTP-binding protein tag-210
AgR019X_g049_t01	AgR019X	836241	848542	-	D2030.2a	chrI	7574274	7578563	+	atp-dependent clp protease atp-binding subunit clpx
AgR019X_g050_t01	AgR019X	849817	855310	+	W04C9.2	chrI	488607	489905	+	MICOS complex subunit MIC13
AgR019X_g052_t02	AgR019X	884327	890616	-	F54C1.7	chrI	5018791	5020166	-	troponin isoform 2
AgR019X_g053_t05	AgR019X	901066	919719	+	K04G2.8a	chrI	8050043	8055465	+	apc-related protein 1
AgR019X_g054_t03	AgR019X	989486	1010546	+	K04F10.1	chrI	6364886	6366224	+	Ataxin-1-like protein
AgR019X_g061_t01	AgR019X	1029014	1038858	-	C48E7.3	chrI	6253701	6254947	+	Neuroguidin
AgR019X_g063_t02	AgR019X	1044703	1048838	-	C48E7.11	chrI	6252986	6253584	+	ovary c ebpg transcription factor
AgR019X_g065_t03	AgR019X	1068678	1079555	+	W06D4.1	chrI	9049460	9055457	-	Homogentisate 1,2-dioxygenase
AgR019X_g066_t02	AgR019X	1094508	1101297	+	C01A2.7a	chrI	13402449	13404106	+	hypothetical protein
AgR019X_g067_t01	AgR019X	1103759	1119015	-	ZC168.1	chrIV	10716648	10721755	+	Sodium/calcium exchanger 3
AgR019X_g068_t03	AgR019X	1126186	1162911	-	C17D12.2a	chrI	11592302	11602095	+	CUGBP Elav family member 4
AgR019X_g069_t05	AgR019X	1170743	1200595	-	ZC308.1a	chrI	6369934	6385713	+	poly rna polymerase gld-2
AgR019X_g072_t02	AgR019X	1227172	1263007	-	F25H5.3a	chrI	9168432	9177488	+	Pyruvate kinase muscle isozyme
AgR019X_g073_t02	AgR019X	1268300	1274574	-	D1037.3	chrI	3680180	3680944	-	soma ferritin
AgR019X_g075_t06	AgR019X	1299541	1317314	-	Y106G6E.5a	chrI	10222881	10226972	-	Cell death abnormality protein 12
AgR019X_g076_t01	AgR019X	1317752	1332359	-	Y106G6E.6	chrI	10227210	10231214	-	casein kinase i isoform gamma-1
AgR019X_g078_t01	AgR019X	1367409	1372573	.	F10F2.4	chrIII	4623052	4626158	+	leucine rich repeat family protein
AgR019X_g079_t02	AgR019X	1383099	1395916	+	F47G4.7a	chrI	14050375	14050428	-	S-adenosylmethionine decarboxylase proenzyme
AgR019X_g081_t02	AgR019X	1402693	1414865	+	F28B3.5a	chrI	4926592	4928840	+	transmembrane protein
AgR019X_g082_t01	AgR019X	1414989	1426660	-	Y87G2A.4	chrI	13543079	13545188	-	Ras-related protein Rab-27B
AgR019X_g083_t01	AgR019X	1438881	1446452	+	C47A10.5a	chrV	17774187	17777227	-	d-aspartate oxidase 1
AgR019X_g085_t02	AgR019X	1477319	1490586	+	F52F12.3	chrI	9895693	9900817	-	mitogen-activated protein kinase kinase kinase 7
AgR019X_g087_t01	AgR019X	1516398	1522149	+	W02D3.4	chrI	6719368	6723054	-	Transmembrane protein 144
AgR019X_g088_t01	AgR019X	1523390	1534876	-	R05D11.5	chrI	8592092	8592926	+	Transmembrane protein 208
AgR019X_g089_t01	AgR019X	1530580	1534840	.	R05D11.3	chrI	8591215	8591978	+	Nuclear transport factor 2
AgR019X_g090_t01	AgR019X	1536943	1552042	+	T24B1.1	chrI	7676668	7679061	+	Golgin subfamily A member 5
AgR019X_g092_t01	AgR019X	1558832	1565312	+	T23G11.5a	chrI	7683341	7694210	+	RalA-binding protein 1
AgR019X_g097_t01	AgR019X	1585388	1592749	+	R05D11.9	chrI	8593027	8596225	+	hypothetical protein
AgR019X_g098_t01	AgR019X	1593290	1605207	+	R05D11.6	chrI	8596333	8598552	+	Sodium/potassium/calcium exchanger 2
AgR019X_g099_t01	AgR019X	1599808	1619574	-	F35C12.2a	chrI	9808904	9813075	+	Sodium/potassium/calcium exchanger 2
AgR019X_g102_t02	AgR019X	1643539	1657201	-	C14F11.1a	chrX	6240955	6242706	+	Aspartate aminotransferase
AgR019X_g105_t01	AgR019X	1667089	1671808	-	F25D7.1	chrI	10398988	10400195	-	Derlin-1
AgR019X_g106_t01	AgR019X	1673378	1685631	+	F25D7.2	chrI	10401067	10402774	+	herpud1-a-prov protein
AgR019X_g108_t03	AgR019X	1715464	1721539	+	F25D7.3a	chrI	10409302	10414109	+	pr domain zinc finger protein 1
AgR019X_g110_t02	AgR019X	1734862	1743426	-	C04F12.8	chrI	9697237	9699561	-	Dual specificity protein phosphatase 14
AgR019X_g114_t01	AgR019X	1804770	1810940	-	T05F1.3	chrI	9621160	9625796	-	40s ribosomal protein s19
AgR019X_g115_t02	AgR019X	1816761	1827089	+	Y53C10A.12	chrI	11953512	11961984	-	Heat shock factor protein 1
AgR019X_g116_t03	AgR019X	1827878	1837763	+	F08B6.3	chrI	6758181	6760179	-	Reticulocalbin-2, partial
AgR019X_g117_t02	AgR019X	1833068	1852730	-	Y92H12A.2a	chrI	1543525	1556183	+	e3 ubiquitin-protein ligase nedd4
AgR019X_g118_t01	AgR019X	1859003	1866490	-	ZK973.11	chrI	4379325	4381948	-	Protein disulfide-isomerase TMX3
AgR019X_g119_t01	AgR019X	1868732	1874260	-	Y54E10BR.5	chrI	3028307	3031092	-	Signal peptidase complex catalytic subunit, partial
AgR019X_g120_t01	AgR019X	1875773	1881229	-	W02D3.9	chrI	6742298	6745341	-	Transducin-like enhancer protein 4, partial
AgR019X_g122_t11	AgR019X	1909789	1919683	-	D2030.10a	chrI	7602307	7608245	+	BAI1-associated protein 3
AgR019X_g124_t01	AgR019X	1929763	1933246	+	ZK973.10	chrI	4372255	4373018	-	NADH dehydrogenase ubiquinone iron-sulfur protein 4
AgR019X_g125_t06	AgR019X	1937611	1948910	-	ZK973.3	chrI	4368089	4370504	+	phosphatase
AgR019X_g126_t01	AgR019X	1949817	1966649	+	C32F10.1a	chrI	5832065	5834637	+	oxysterol-binding protein 9
AgR019X_g127_t01	AgR019X	1976127	1976423	+	W02D3.12	chrI	6741984	6742358	+	Succinate dehydrogenase assembly factor 4, mitochondrial
AgR019X_g128_t01	AgR019X	1978849	1985926	+	F13G3.5a	chrI	7301062	7303227	-	Inositol monophosphatase ttx-7
AgR019X_g132_t01	AgR019X	2013412	2028115	+	F28H1.3	chrI	3983171	3986581	+	alanine--trna cytoplasmic
AgR019X_g133_t01	AgR019X	2030389	2040405	-	C53D5.1a	chrI	291215	305468	+	protein fam69c
AgR019X_g136_t02	AgR019X	2072647	2080382	+	T27F6.7	chrI	12494826	12497354	+	hypothetical protein
AgR019X_g140_t04	AgR019X	2119489	2128265	+	T27F6.5a	chrI	12487034	12488960	+	putative proline--trna
AgR019X_g142_t01	AgR019X	2142430	2154248	+	K07G5.1	chrI	7152463	7156868	-	leucine-rich repeat-containing protein 16a
AgR019X_g143_t01	AgR019X	2156420	2181850	+	C44E12.1	chrX	7596927	7599824	+	Peptidase M20 domain-containing protein
AgR019X_g144_t11	AgR019X	2170110	2183285	-	ZC190.1	chrV	8682955	8686160	+	battenin
AgR019X_g146_t02	AgR019X	2216123	2248165	+	Y47G6A.11	chrI	3449326	3462177	+	dna mismatch repair protein msh6
AgR019X_g147_t04	AgR019X	2250053	2268257	+	C34B7.2	chrI	8336966	8341826	+	Polyphosphoinositide phosphatase
AgR019X_g148_t10	AgR019X	2317409	2338103	+	Y71G12B.15a	chrI	1698387	1701127	+	Ubiquitin-conjugating enzyme E2 R2
AgR019X_g149_t01	AgR019X	2347069	2360937	+	Y71G12B.13	chrI	1702105	1708008	+	hypothetical protein
AgR019X_g150_t06	AgR019X	2356417	2458611	-	ZC581.9	chrI	6665077	6670409	-	SCY1-like protein 2
AgR019X_g153_t07	AgR019X	2484037	2534313	-	T19B4.7	chrI	5679844	5691503	-	Netrin receptor DCC
AgR019X_g154_t01	AgR019X	2545131	2559286	-	M01E5.5a	chrI	13292514	13297555	+	DNA topoisomerase 1
AgR019X_g156_t02	AgR019X	2586349	2595936	+	Y71G12B.23a	chrI	1670036	1672740	-	Monocyte to macrophage differentiation protein
AgR019X_g158_t02	AgR019X	2645643	2682968	+	Y47G6A.17	chrI	3487812	3499706	-	227 kDa spindle- and centromere-associated protein, partial
AgR019X_g162_t01	AgR019X	2716080	2727178	-	Y119C1B.4	chrI	4508917	4511126	-	putative 39s ribosomal protein
AgR019X_g163_t01	AgR019X	2729640	2742440	-	Y71H2AR.3	chrIII	2836639	2838453	+	Josephin-2
AgR019X_g164_t05	AgR019X	2757637	2781532	+	K10D3.4	chrI	7134738	7139973	-	maguk p55 subfamily member 6
AgR019X_g165_t01	AgR019X	2828130	2832725	+	D2030.5	chrI	7582106	7583349	+	methylmalonyl
AgR019X_g168_t03	AgR019X	2854172	2861217	+	C27A12.10	chrI	6064088	6065298	+	Methyl-CpG-binding domain protein 2
AgR019X_g169_t01	AgR019X	2866707	2880012	+	T23H2.5	chrI	6457061	6458479	-	Ras-related protein Rab-10
AgR019X_g172_t01	AgR019X	2912128	2964501	-	ZC123.3a	chrI	803368	834808	+	Zinc finger homeobox protein 2
AgR019X_g173_t03	AgR019X	3147460	3169409	-	W02D3.2	chrI	6736686	6741174	+	dihydroorotate dehydrogenase
AgR019X_g175_t03	AgR019X	3176823	3182513	-	Y106G6H.14	chrI	10472196	10473389	-	osteoclast-stimulating factor 1
AgR019X_g177_t02	AgR019X	3187960	3201882	-	F30B5.7	chrIV	4229195	4231861	-	zinc transporter zip3
AgR019X_g178_t04	AgR019X	3206792	3212824	-	C26C6.7a	chrI	7508721	7512593	+	cre-glb-8 protein
AgR019X_g180_t02	AgR019X	3236586	3248767	-	F26H9.2	chrI	9289753	9294035	-	Phosphatase and actin regulator 2
AgR019X_g182_t07	AgR019X	3272229	3286833	+	C37A2.4a	chrI	6780806	6784396	+	g1 s-specific cyclin-e
AgR019X_g183_t01	AgR019X	3292506	3300918	+	Y50C1A.1a	chrI	398891	412915	+	OTU domain-containing protein 7B
AgR019X_g185_t02	AgR019X	3306273	3316141	+	Y74C9A.2a	chrI	11499	16837	+	hypothetical protein
AgR019X_g192_t01	AgR019X	3413998	3419565	+	M01E5.2	chrI	13277061	13280175	-	GTP-binding protein 5
AgR019X_g195_t01	AgR019X	3428920	3440680	-	F16A11.2a	chrI	9390829	9393095	-	trna-splicing ligase-like protein
AgR019X_g199_t03	AgR019X	3449115	3458262	+	C41C4.4a	chrII	8112262	8124910	-	Serine/threonine-protein kinase/endoribonuclease ire-1
AgR019X_g202_t02	AgR019X	3507212	3520301	-	Y23H5A.5a	chrI	2606754	2617360	+	Alpha-catulin
AgR019X_g203_t08	AgR019X	3531160	3579007	+	W03D8.6a	chrI	2802822	2815786	+	Contactin-associated protein
AgR019X_g204_t01	AgR019X	3571014	3589696	-	ZC328.3a	chrI	6409050	6417010	-	GRAM domain-containing protein 1C
AgR019X_g206_t05	AgR019X	3633612	3640878	+	Y65B4A.1	chrI	654090	658810	+	hiv tat-specific factor 1-like protein
AgR019X_g208_t01	AgR019X	3643664	3650547	-	Y87G2A.17	chrI	13491425	13493317	-	HIV Tat-specific factor 1
AgR019X_g209_t03	AgR019X	3656291	3669746	-	F36F2.5	chrI	9020945	9025553	+	cyclic nucleotide-gated cation channel beta-1
AgR019X_g210_t01	AgR019X	3678751	3692530	+	Y47D9A.1a	chrI	4303930	4308244	+	mannose-1-phosphate guanyltransferase alpha-a
AgR019X_g211_t16	AgR019X	3779732	3786278	+	ZK973.6	chrI	4321095	4359080	+	Nuclear anchorage protein 1
AgR019X_g218_t02	AgR019X	3790745	3810679	-	Y18D10A.8	chrI	12844269	12853105	+	kh domain-containing protein
AgR019X_g219_t02	AgR019X	3834162	3850928	+	Y110A7A.5	chrI	5134709	5137971	+	Myotubularin-related protein 2
AgR019X_g224_t01	AgR019X	3911788	3919234	-	T10E9.8	chrI	6539185	6541084	-	cbr-cuti-1 protein
AgR019X_g225_t01	AgR019X	3943789	3964759	+	F11A6.1a	chrI	11676045	11680632	+	Furin-like protease 1, isoform 1/1-X/2
AgR019X_g226_t01	AgR019X	3965508	3988017	-	Y71F9AM.4a	chrI	2931461	2947152	+	Conserved oligomeric Golgi complex subunit 3
AgR021X_g010_t01	AgR021X	52672	65544	+	R13G10.2	chrIII	3822403	3826261	+	Lysine-specific histone demethylase 1B, partial
AgR021X_g014_t02	AgR021X	98774	108260	+	Y41C4A.10	chrIII	11718834	11719450	-	transcription elongation factor b polypeptide 2
AgR021X_g015_t05	AgR021X	108751	121433	+	Y41C4A.9	chrIII	11710827	11718741	-	Digestive organ expansion factor
AgR021X_g017_t02	AgR021X	132436	143491	+	Y41C4A.8	chrIII	11706969	11708820	-	Metal homeostasis factor ATX1, partial
AgR021X_g019_t05	AgR021X	147983	153052	+	Y43F4B.9a	chrIII	13315088	13316985	+	wd repeat-containing protein 85
AgR021X_g020_t03	AgR021X	155965	168380	+	M01F1.3	chrIII	3503711	3505355	-	Lipoyl synthase
AgR021X_g021_t03	AgR021X	169999	185020	+	M01F1.9	chrIII	3493811	3499057	-	retrograde golgi transport protein rgp1-like protein
AgR021X_g023_t02	AgR021X	199698	238313	+	F01F1.7	chrIII	5848838	5853269	-	ATP-dependent RNA helicase DDX23
AgR021X_g024_t02	AgR021X	277216	298775	+	R12B2.5a	chrIII	5829678	5833708	-	Mediator of RNA polymerase II transcription subunit 15
AgR021X_g028_t04	AgR021X	338407	345059	+	D1054.2	chrV	10770321	10771351	+	proteasome subunit alpha type-2
AgR021X_g032_t03	AgR021X	365394	380081	-	Y53G8AR.2a	chrIII	3322970	3331727	+	protein jade-1
AgR021X_g034_t01	AgR021X	383868	401677	+	F09G8.5	chrIII	8254975	8257638	+	Uncharacterized protein F09G8.5
AgR021X_g035_t01	AgR021X	402878	416633	+	Y55D5A.6	chrIII	3042726	3047125	-	metaxin-2
AgR021X_g036_t06	AgR021X	420812	434023	-	ZK686.2	chrIII	7763698	7766052	-	atp-dependent rna helicase
AgR021X_g039_t02	AgR021X	445269	456247	+	K10H10.1	chrII	14489802	14492715	+	solute carrier family 17 member 9
AgR021X_g040_t04	AgR021X	456587	468536	-	C08F8.6	chrIV	11162768	11164622	-	Tau-tubulin kinase 2
AgR021X_g048_t03	AgR021X	590278	607819	+	C09F5.2a	chrIII	646754	654463	+	Protein orai
AgR021X_g053_t03	AgR021X	662144	670690	+	K10C8.2	chrV	12680107	12692364	+	FMRFamide receptor
AgR021X_g060_t02	AgR021X	752238	791835	-	T28F2.5	chrI	3641668	3647009	-	Voltage-dependent L-type calcium channel subunit beta-2
AgR021X_g066_t01	AgR021X	834159	845801	+	F32B6.9	chrIV	9903908	9905903	+	bestrophin-3
AgR021X_g067_t02	AgR021X	852043	859474	-	F28B3.9	chrI	4929099	4932147	+	1-acyl-sn-glycerol-3-phosphate acyltransferase epsilon
AgR021X_g074_t01	AgR021X	956887	969925	+	C09F5.3	chrIII	662847	666265	-	Zinc finger protein 26
AgR021X_g075_t02	AgR021X	986637	995845	+	F21F3.6	chrI	4911805	4914047	-	hypothetical protein
AgR021X_g077_t01	AgR021X	998203	1005149	+	F57B10.5	chrI	6562699	6563660	+	transmembrane emp24 domain-containing protein 7
AgR021X_g079_t01	AgR021X	1026627	1034075	+	Y110A7A.13	chrI	5103581	5104956	-	cysteine and histidine-rich domain-containing protein 1
AgR021X_g080_t01	AgR021X	1033396	1043428	-	W01B11.3	chrI	3267094	3269116	+	Nucleolar protein 58
AgR021X_g083_t01	AgR021X	1059838	1071622	-	K10C3.6a	chrI	9869693	9874676	+	nuclear hormone receptor family member nhr-49
AgR021X_g085_t01	AgR021X	1082319	1093487	+	F32B5.8a	chrI	2686640	2689493	-	cathepsin z
AgR021X_g086_t01	AgR021X	1090781	1096735	-	F21C3.3	chrI	7279660	7280501	-	Histidine triad nucleotide-binding protein 1, partial
AgR021X_g089_t01	AgR021X	1156745	1186597	+	ZK270.1	chrI	14909240	14913083	+	patched domain-containing protein 3
AgR021X_g101_t02	AgR021X	1313637	1335661	+	B0280.12a	chrIII	7138683	7144832	-	Glutamate receptor 1
AgR021X_g102_t02	AgR021X	1333367	1347704	-	C06E8.5	chrIII	7002301	7005450	-	lbp bpi cetp family domain-containing protein
AgR021X_g103_t06	AgR021X	1397267	1401549	+	C07F11.1	chrI	443999	461605	+	Insulin-like growth factor-binding protein complex acid labile subunit
AgR021X_g104_t04	AgR021X	1360454	1429042	-	Y40B1B.6	chrI	13438066	13450197	+	Lysine-specific histone demethylase 1A
AgR021X_g105_t03	AgR021X	1430487	1439965	-	Y40B1B.5	chrI	13435489	13437965	+	hypothetical protein
AgR021X_g106_t03	AgR021X	1447122	1462343	+	F42H11.2	chrI	9578526	9581267	-	Ankyrin repeat and LEM domain-containing protein 1
AgR021X_g107_t02	AgR021X	1463112	1468439	-	C55B7.12a	chrI	6517575	6520879	-	fez family zinc finger protein 1
AgR021X_g109_t02	AgR021X	1478453	1485532	-	T25G3.1	chrI	7552975	7554497	+	Uncharacterized protein KIAA1143 homolog
AgR021X_g111_t02	AgR021X	1501515	1516484	-	Y110A7A.17a	chrI	5123916	5127199	-	Cell division cycle protein 27
AgR021X_g113_t01	AgR021X	1531125	1535694	+	Y71F9B.2a	chrI	2731562	2735371	+	MMP37-like protein
AgR021X_g114_t03	AgR021X	1537788	1550823	+	C54G4.4	chrI	7996728	8003179	-	von willebrand factor type egf and pentraxin domain-containing protein 1
AgR021X_g115_t01	AgR021X	1557865	1565854	+	F15D3.7	chrI	11578641	11579612	+	Import inner membrane translocase subunit Tim23
AgR021X_g121_t03	AgR021X	1688006	1696027	+	ZC247.2	chrI	10255632	10262250	-	hypothetical protein
AgR021X_g123_t02	AgR021X	1718464	1721219	-	Y54E10BL.5	chrI	3001360	3002847	-	hypothetical protein
AgR021X_g124_t01	AgR021X	1723151	1745180	+	K07A12.1	chrI	8666595	8669792	+	Transcription factor 25
AgR021X_g126_t03	AgR021X	1745997	1753104	-	W09C3.4	chrI	4704598	4705881	+	putative dna-directed rna polymerase iii subunit rpc6
AgR021X_g127_t04	AgR021X	1755310	1781203	+	Y48G8AL.10a	chrI	1136371	1154386	-	Zinc finger protein Xfin
AgR021X_g128_t01	AgR021X	1778391	1793828	-	E01A2.7	chrI	4142282	4144583	-	mechanosensory abnormality protein 6
AgR021X_g132_t01	AgR021X	1857929	1862547	+	W02A11.2	chrI	12733287	12736782	-	Vacuolar protein-sorting-associated protein 25
AgR021X_g133_t01	AgR021X	1864592	1870200	+	W02A11.1	chrI	12730011	12732753	-	tRNA (adenine-N(1)-)-methyltransferase catalytic subunit
AgR021X_g136_t03	AgR021X	1896709	1920073	-	F55D12.5a	chrI	7906826	7914269	-	hypothetical protein
AgR021X_g137_t02	AgR021X	1934493	1990254	+	Y105E8A.26a	chrI	14529531	14546634	+	Tight junction protein ZO-2
AgR021X_g142_t01	AgR021X	2035565	2042499	+	ZK770.3	chrI	3755457	3759077	-	innexin unc-9
AgR021X_g143_t02	AgR021X	2057743	2075808	-	W03F11.1a	chrI	2219471	2222313	-	chitin binding peritrophin-a domain containing protein
AgR021X_g144_t03	AgR021X	2084539	2105987	+	T12F5.5a	chrI	3733028	3740479	-	La-related protein CG11505, partial
AgR021X_g145_t04	AgR021X	2118964	2135784	-	W10C8.2	chrI	2823254	2830311	-	Protein pop-1, partial
AgR021X_g147_t01	AgR021X	2182890	2203631	+	Y71G12B.4	chrI	1808091	1811835	+	Peptidylglycine alpha-hydroxylating monooxygenase
AgR021X_g149_t01	AgR021X	2207868	2213962	-	Y73E7A.1a	chrI	1629003	1633498	+	Coiled-coil domain-containing protein 124
AgR021X_g152_t03	AgR021X	2240005	2289297	-	C06A5.7a	chrI	5992670	5999240	-	Tropomodulin
AgR021X_g153_t07	AgR021X	2269376	2287563	+	C46C11.3	chrX	4629039	4631838	+	hypothetical protein
AgR021X_g155_t01	AgR021X	2359276	2366335	-	C52B9.7a	chrX	4293193	4294365	-	Platelet-activating factor acetylhydrolase 2
AgR021X_g158_t03	AgR021X	2459085	2463357	+	Y56A3A.5	chrIII	11886485	11891435	-	Fatty-acid amide hydrolase 1
AgR021X_g159_t02	AgR021X	2469708	2490508	-	Y37E11AL.6a	chrIV	3658877	3668703	-	hypothetical protein
AgR021X_g161_t05	AgR021X	2518753	2526939	+	F42A6.6a	chrIV	3334139	3336854	-	Protein OPI10
AgR021X_g162_t01	AgR021X	2528832	2534768	+	F29C4.7a	chrIV	121797	125929	-	RNA-binding protein 15B
AgR021X_g164_t02	AgR021X	2603022	2613201	+	F31C3.6a	chrI	15053617	15059003	-	hypothetical protein
AgR021X_g165_t01	AgR021X	2613454	2619846	+	C09G4.1a	chrIV	8540473	8544403	+	ceramide synthase 5
AgR021X_g169_t02	AgR021X	2719449	2724248	+	C52D10.11	chrIV	17190177	17191891	-	FMRFamide-like peptide 8
AgR021X_g172_t01	AgR021X	2736353	2738280	+	F44B9.2	chrIII	8022463	8025195	+	Uncharacterized protein F44B9.2
AgR021X_g175_t01	AgR021X	2743567	2760775	-	ZK180.4	chrIV	4511896	4513319	-	gtp-binding protein sar1
AgR021X_g177_t04	AgR021X	2780400	2797266	+	B0496.8	chrIV	7449067	7451445	-	Testin
AgR021X_g178_t02	AgR021X	2799740	2811717	+	M02B1.1a	chrIV	12849506	12854408	+	UDP-galactose/UDP-N-acetylglucosamine transporter srf-3
AgR021X_g179_t01	AgR021X	2824129	2861312	+	Y37A1B.17a	chrIV	13964367	13979847	-	dynamin-binding protein
AgR021X_g180_t03	AgR021X	2864487	2870265	+	R05G6.7	chrIV	7506425	7507891	-	Voltage-dependent anion-selective channel
AgR021X_g181_t02	AgR021X	2879447	2883350	+	C44B12.2a	chrIV	1107396	1110856	+	SPARC
AgR021X_g182_t01	AgR021X	2887850	2899128	+	B0035.14a	chrIV	11303845	11304787	+	DnaJ subfamily B member 12
AgR021X_g183_t03	AgR021X	2902289	2905573	+	F38A5.13	chrIV	6585871	6588186	+	DnaJ subfamily C member 2
AgR021X_g186_t02	AgR021X	2925734	2938131	+	ZK682.5	chrV	9284129	9287617	-	Leucine-rich repeat-containing protein 15
AgR021X_g190_t01	AgR021X	2958133	2979466	+	ZC412.2	chrV	14863168	14867992	-	Guanylate cyclase receptor-type gcy-1
AgR021X_g191_t01	AgR021X	2978765	2985881	-	F35G12.9	chrIII	4593863	4594426	-	Anaphase-promoting complex subunit 11, partial
AgR021X_g193_t01	AgR021X	2993151	3000342	-	Y63D3A.4	chrI	14097492	14101090	-	5 -tyrosyl-dna phosphodiesterase
AgR021X_g195_t03	AgR021X	3044941	3051380	+	ZC477.3a	chrIV	7103492	7105096	+	Coiled-coil domain-containing protein 51
AgR021X_g196_t04	AgR021X	3037693	3043386	-	Y55F3BL.4	chrIV	805102	806236	+	SRR1-like protein
AgR021X_g197_t01	AgR021X	3054387	3066428	+	C47E12.6	chrIV	9983195	9989678	+	hypothetical protein
AgR021X_g200_t01	AgR021X	3139814	3162146	+	ZC410.4a	chrIV	9082361	9087554	+	TWiK family of potassium channels protein 18
AgR021X_g202_t01	AgR021X	3174812	3187729	+	ZC410.5a	chrIV	9088594	9092193	+	hypothetical protein
AgR021X_g203_t02	AgR021X	3192222	3208074	-	C46A5.9	chrIV	7770770	7774275	-	Host cell factor 1
AgR021X_g205_t01	AgR021X	3225253	3237726	+	C33H5.7	chrIV	7774411	7775956	+	WD repeat-containing protein 82
AgR021X_g209_t01	AgR021X	3370314	3371728	-	F54B3.1a	chrII	10251266	10268168	+	Protein SZT2, partial
AgR021X_g212_t01	AgR021X	3418472	3423433	+	T24B8.6	chrII	9086608	9087917	+	Achaete-scute 5
AgR027X_g002_t05	AgR027X	11887	26096	+	F42A10.4a	chrIII	6164909	6168547	-	Eukaryotic elongation factor 2 kinase
AgR027X_g003_t03	AgR027X	22698	40443	-	Y43F8C.4	chrV	19625062	19630753	+	Eukaryotic elongation factor 2 kinase
AgR027X_g006_t01	AgR027X	87396	97859	+	T04F8.1	chrX	11659510	11661660	-	Sideroflexin-3
AgR027X_g007_t02	AgR027X	99006	106610	-	T12B3.1	chrIV	7382415	7384752	+	Protein tyrosine phosphatase domain-containing protein 1
AgR027X_g008_t02	AgR027X	112591	123694	-	T12B3.4a	chrIV	7384756	7388943	-	Mps one binder kinase activator-like protein 2B
AgR027X_g016_t03	AgR027X	237904	256821	-	T10B10.2	chrX	15173904	15178145	+	Cytochrome b-c1 complex subunit 2
AgR027X_g017_t01	AgR027X	270389	292664	+	K02A4.1	chrX	12877480	12880328	+	branched-chain-amino-acid cytosolic
AgR027X_g019_t04	AgR027X	293591	309727	-	W03G11.3	chrX	12100196	12103812	-	alpha-l-fucosidase
AgR027X_g021_t01	AgR027X	342246	378831	+	T23E7.2a	chrX	17671029	17680793	+	ras and ef-hand domain-containing protein-like protein
AgR027X_g022_t03	AgR027X	380414	415752	-	C33D12.6	chrX	3055257	3059385	-	Ras and EF-hand domain-containing protein
AgR027X_g023_t03	AgR027X	431907	439862	+	H18N23.2a	chrX	17622781	17627975	-	Protein phosphatase 1 regulatory subunit 3B
AgR027X_g024_t02	AgR027X	456047	473782	-	F53B3.5	chrX	2872739	2879619	-	hypothetical protein
AgR027X_g027_t02	AgR027X	496112	511880	-	Y38C9A.2a	chrV	118043	119989	-	RecName: Full=GTP-binding protein AGP-1
AgR027X_g028_t01	AgR027X	521389	529097	-	C14A11.7	chrX	2823501	2826827	-	GTP-binding protein Rhes
AgR027X_g029_t07	AgR027X	563509	574180	+	T03F1.7	chrI	3854169	3859292	-	Dimethyladenosine transferase 1
AgR027X_g031_t01	AgR027X	584721	615719	+	C09H6.1a	chrI	8103601	8109221	+	Suppressor of presenilin protein 4
AgR027X_g036_t01	AgR027X	676587	709464	-	R10H10.5	chrIV	10404012	10408530	+	Guanine nucleotide-binding protein G(o) subunit alpha
AgR027X_g040_t06	AgR027X	754336	769872	-	M02A10.3a	chrX	720330	725957	-	E3 ubiquitin-protein ligase CBL-B
AgR027X_g041_t01	AgR027X	788265	823605	+	D2085.5a	chrII	8669133	8677269	-	Ral GTPase-activating protein subunit beta
AgR027X_g048_t04	AgR027X	910655	924780	-	F35C8.4	chrX	5349098	5352423	+	Syntaxin-1
AgR027X_g049_t04	AgR027X	957494	971520	+	W01C8.6a	chrX	5705719	5710625	-	synaptic vesicular amine transporter
AgR027X_g050_t04	AgR027X	977906	994295	+	F39H12.2	chrX	830258	833760	+	wd repeat-containing protein 54
AgR027X_g051_t01	AgR027X	991372	997525	-	R12H7.2	chrX	13218977	13221462	-	Cathepsin D
AgR027X_g053_t01	AgR027X	1013922	1019940	-	ZK455.3	chrX	11328591	11332072	+	Allatostatin-A receptor
AgR027X_g054_t04	AgR027X	1030158	1037867	-	T04F8.2	chrX	11653570	11656569	-	integral membrane protein
AgR027X_g055_t08	AgR027X	1038589	1052815	+	C43H6.7	chrX	2398812	2402057	-	cub domain protein
AgR027X_g058_t03	AgR027X	1087629	1097581	-	F20B6.2	chrX	4191094	4193144	+	V-type proton ATPase subunit B
AgR027X_g059_t01	AgR027X	1100243	1104438	+	K10C2.12	chrX	6420074	6420781	-	hypothetical protein
AgR027X_g062_t01	AgR027X	1191680	1280066	+	W07E11.1a	chrX	10084627	10104252	+	Glutamate synthase NADPH, partial
AgR027X_g064_t01	AgR027X	1241918	1244482	-	W07E11.2	chrX	10091961	10092964	-	FMRFamide-like neuropeptides 3
AgR027X_g066_t06	AgR027X	1302253	1319312	+	Y102A11A.8	chrX	2039397	2046360	-	Fibroblast growth factor receptor
AgR027X_g067_t01	AgR027X	1314083	1325398	-	F40E10.5	chrX	14701790	14703682	+	onchocerca related antigen family member (ora-1)
AgR027X_g068_t04	AgR027X	1325695	1337183	-	C25G6.2	chrX	1245984	1247892	+	hypothetical protein
AgR027X_g070_t01	AgR027X	1372350	1387158	+	F26H9.4	chrI	9305751	9306844	-	nicotinamide mononucleotide adenylyltransferase 1
AgR027X_g072_t01	AgR027X	1396119	1401791	+	T19D7.1	chrX	673027	676484	+	Ligand-gated ion channel 50
AgR027X_g074_t01	AgR027X	1427137	1431355	+	ZK563.4a	chrX	3373253	3374740	-	hypothetical protein
AgR027X_g075_t04	AgR027X	1444418	1457049	-	F43C9.4a	chrX	4796168	4799622	-	cub domain containing protein
AgR027X_g076_t02	AgR027X	1466883	1481117	-	R08E3.4a	chrX	4807379	4811536	-	zinc finger protein
AgR027X_g080_t02	AgR027X	1525931	1534768	-	F14B8.7	chrX	6921646	6924764	-	hypothetical protein
AgR027X_g081_t03	AgR027X	1561168	1583138	+	H42K12.1a	chrX	1321353	1327985	+	3-phosphoinositide-dependent protein kinase 1
AgR027X_g082_t04	AgR027X	1584761	1596298	-	F49E2.2a	chrX	9569379	9573723	+	hypothetical protein
AgR027X_g083_t01	AgR027X	1602095	1619490	+	F22B5.4	chrII	8449701	8452739	+	hypothetical protein
AgR027X_g084_t01	AgR027X	1604567	1608791	+	F59F3.6	chrX	10998004	10999276	-	k+ channel tetramerisation domain containing protein
AgR027X_g088_t04	AgR027X	1666756	1683014	+	F44A6.1a	chrX	10197706	10200369	+	nucleobindin-2
AgR027X_g091_t01	AgR027X	1725379	1737717	-	C27C12.4	chrX	14854131	14856518	+	UNC93-like protein
AgR027X_g098_t01	AgR027X	1811654	1826230	-	C42D8.3	chrX	5087840	5092538	+	pantothenate kinase 4
AgR027X_g099_t01	AgR027X	1832299	1841790	+	F40B5.2a	chrX	8368539	8371545	+	Metallophosphoesterase F40B5.2
AgR027X_g100_t01	AgR027X	1848095	1854244	+	T14G12.4a	chrX	3740208	3742323	-	Fork head domain transcription factor slp2
AgR027X_g102_t05	AgR027X	1878514	1890220	+	T07A9.9a	chrIV	393880	396420	+	Nucleolar GTP-binding protein 1
AgR027X_g104_t01	AgR027X	1890337	1893540	+	T07A9.8	chrIV	396545	399095	+	Ribosomal RNA-processing protein 8
AgR027X_g105_t02	AgR027X	1919712	1929662	-	C06E7.3a	chrIV	5844328	5846335	-	S-adenosylmethionine synthase 4
AgR027X_g106_t01	AgR027X	1937976	1948610	-	C07A12.4a	chrX	4524187	4526532	+	putative disulphide isomerase
AgR027X_g108_t03	AgR027X	1961447	1968223	-	F46H6.1	chrX	4508509	4510960	+	Rho GDP-dissociation inhibitor
AgR027X_g109_t01	AgR027X	1974935	1978831	+	R11G1.1	chrX	3659492	3666879	+	Angiopoietin-4
AgR027X_g112_t02	AgR027X	1999826	2006675	-	C02F12.3	chrX	3668113	3668907	-	Protein snet-1
AgR027X_g113_t03	AgR027X	2012698	2024399	+	C42C1.5	chrIV	12276083	12278052	-	Mannose-1-phosphate guanyltransferase beta
AgR027X_g116_t02	AgR027X	2040521	2055418	-	C04A11.4	chrX	13687973	13695771	+	Disintegrin and metalloproteinase domain-containing protein 19
AgR027X_g117_t02	AgR027X	2063400	2099095	-	C04A11.3	chrX	13677192	13682340	+	STE20-like serine/threonine-protein kinase
AgR027X_g118_t01	AgR027X	2116856	2153857	+	F58A3.2a	chrX	11016441	11023368	+	myoblast growth factor receptor egl-15
AgR027X_g120_t01	AgR027X	2177687	2179872	+	F58A3.4	chrX	11009558	11010640	-	msp domain-containing protein
AgR027X_g122_t01	AgR027X	2196415	2200697	-	C11E4.1	chrX	9584664	9586344	+	Glutathione peroxidase
AgR027X_g123_t02	AgR027X	2221949	2224904	+	F49E2.4a	chrX	9573741	9575866	-	putative galaptin lec-8
AgR027X_g124_t08	AgR027X	2243121	2256425	-	F22A3.1a	chrX	6519107	6522647	+	DNA-binding protein D-ETS-4
AgR027X_g128_t03	AgR027X	2371478	2396123	+	T08A9.1	chrX	7334714	7340224	+	RB1-inducible coiled-coil protein 1
AgR035X_g006_t01	AgR035X	79229	92789	+	M04F3.4a	chrI	4771600	4773026	-	Programmed cell death protein 6
AgR035X_g007_t02	AgR035X	88132	98008	-	C45E1.1a	chrI	3104363	3109542	+	nuclear hormone receptor family member nhr-64
AgR035X_g008_t04	AgR035X	101579	106778	+	F48C1.6	chrI	5318225	5319301	-	hypothetical protein
AgR035X_g009_t01	AgR035X	108574	132523	+	DY3.7	chrI	8792965	8797293	+	Disintegrin and metalloproteinase domain-containing protein 10
AgR035X_g011_t08	AgR035X	146856	163926	-	C09D4.4a	chrI	5479550	5484643	-	Protein FAM135A
AgR035X_g012_t02	AgR035X	165516	188769	-	T27A3.2	chrI	6110134	6114537	+	Ubiquitin carboxyl-terminal hydrolase 5
AgR035X_g013_t06	AgR035X	213350	223340	-	F56G4.5	chrI	11380231	11388751	+	Peptide-N(4)-(N-acetyl-beta-glucosaminyl)asparagine amidase
AgR035X_g014_t01	AgR035X	225981	242287	+	T19A6.2a	chrI	8394728	8398626	+	nucleolar gtp-binding protein 2
AgR035X_g018_t05	AgR035X	338901	399035	+	ZK337.1a	chrI	14994771	15001677	+	CD109 antigen
AgR035X_g019_t02	AgR035X	398269	415006	-	M05B5.6	chrI	7183053	7185709	+	Transient receptor potential cation channel subfamily A member 1
AgR035X_g023_t03	AgR035X	455447	465683	-	T20H4.3a	chrIII	7239027	7241262	+	bifunctional glutamate proline--trna ligase
AgR035X_g024_t01	AgR035X	470961	480897	-	ZK993.1a	chrI	1128324	1131737	+	Homeobox protein goosecoid, partial
AgR035X_g026_t01	AgR035X	495080	500155	-	Y48G8AL.7	chrI	1157571	1162939	+	hypothetical protein
AgR035X_g044_t02	AgR035X	732963	753474	+	F36D1.1	chrI	11276451	11280018	-	hypothetical protein
AgR035X_g047_t01	AgR035X	777760	787113	+	F59C6.7a	chrI	10507000	10515506	-	Intraflagellar transport protein che-13, partial
AgR035X_g050_t01	AgR035X	862835	875532	+	Y48G8AL.5a	chrI	1193158	1211434	+	tRNA (cytosine-5-)-methyltransferase NSUN2
AgR035X_g054_t01	AgR035X	923069	934603	-	C27A12.8	chrI	6058546	6061033	-	protein ariadne-1
AgR035X_g056_t01	AgR035X	955501	962480	-	C25A1.2	chrI	10163475	10165126	-	forkhead box protein j3
AgR035X_g057_t06	AgR035X	968275	1018971	-	C27A12.9	chrI	6061752	6068040	-	Protein still life, isoform SIF type 1, partial
AgR035X_g061_t04	AgR035X	1034125	1051256	+	C27A12.5	chrI	6046832	6050462	-	Homeotic protein empty spiracle
AgR035X_g062_t01	AgR035X	1058539	1126001	+	C44E4.1a	chrI	4610147	4633347	-	e3 ubiquitin-protein ligase ubr4
AgR035X_g064_t02	AgR035X	1139798	1160830	+	F52F12.6a	chrI	9902943	9910545	-	Myelin transcription factor 1-like protein
AgR035X_g065_t01	AgR035X	1180932	1190335	+	T22A3.4a	chrI	10590678	10593972	+	SET and MYND domain-containing protein 3
AgR035X_g074_t05	AgR035X	1319406	1374001	+	ZK270.2a	chrI	14875784	14897367	-	Phosphoenolpyruvate carboxykinase GTP
AgR035X_g076_t05	AgR035X	1375201	1393005	-	F55F8.5	chrI	5655950	5658118	-	Ribosome biogenesis protein WDR12
AgR035X_g078_t03	AgR035X	1403626	1432786	-	C32E8.8	chrI	3789309	3792797	-	patched domain-containing protein 3
AgR035X_g079_t02	AgR035X	1430073	1434889	+	C25A1.16a	chrI	10179018	10179744	+	H/ACA ribonucleoprotein complex subunit 3, partial
AgR035X_g080_t04	AgR035X	1435406	1450549	+	C25A1.7a	chrI	10179845	10183932	+	Isoleucyl-tRNA synthetase
AgR035X_g081_t01	AgR035X	1442047	1459097	-	T01G9.2a	chrI	8275647	8288124	-	Isoleucyl-tRNA synthetase
AgR035X_g082_t01	AgR035X	1460045	1467662	+	Y106G6H.4	chrI	10436895	10437708	-	hypothetical protein
AgR035X_g084_t01	AgR035X	1524567	1546391	-	F25F8.2	chrI	4885062	4888002	-	glutamate-gated chloride channel subunit beta
AgR035X_g085_t03	AgR035X	1524613	1590928	+	F25F8.1	chrI	4884903	4895495	+	hypothetical protein
AgR035X_g087_t07	AgR035X	1614538	1631972	+	B0414.8a	chrI	5803959	5807291	-	Protein fat-free, partial
AgR035X_g088_t01	AgR035X	1625477	1632921	-	T06A4.1a	chrI	770892	776354	+	Carboxypeptidase B, partial
AgR035X_g089_t07	AgR035X	1639883	1658354	-	T01H8.1a	chrI	8573868	8580119	-	Ribosomal protein S6 kinase 2 alpha
AgR035X_g092_t03	AgR035X	1699174	1716282	-	C32E8.3	chrI	3786588	3787494	+	TPPP family protein
AgR035X_g094_t07	AgR035X	1742086	1767284	+	C32E8.7	chrI	3778089	3781690	-	Resistance to inhibitors of cholinesterase protein 19
AgR035X_g097_t05	AgR035X	1801855	1846689	+	F15D3.1a	chrI	11526918	11557851	-	dystrophin-1
AgR036X_g010_t03	AgR036X	117981	161520	-	F31C3.3	chrI	15041433	15050700	-	Protein KIAA0100
AgR036X_g013_t01	AgR036X	191908	197480	+	C29A12.4a	chrV	10825012	10846695	+	Neurexin-2-alpha
AgR036X_g021_t01	AgR036X	277415	294935	+	C18B12.2	chrX	15026308	15031084	+	Calcitonin receptor-like protein 1
AgR036X_g022_t01	AgR036X	296544	299890	-	C18B12.3	chrX	15031353	15034541	-	Visual system homeobox 1
AgR036X_g023_t03	AgR036X	300718	321127	-	C15B12.5a	chrX	6479447	6484810	-	G protein linked acetylcholine receptor isoform b
AgR036X_g025_t07	AgR036X	353720	363541	-	C14F5.5	chrX	7959452	7961723	-	Sex muscle abnormal protein 5
AgR036X_g026_t01	AgR036X	340754	347015	+	C14F5.1a	chrX	7954356	7956211	+	BNIP3 homolog
AgR036X_g027_t01	AgR036X	365990	375292	+	Y69A2AR.2a	chrIV	2642979	2650104	+	Synembryn
AgR036X_g030_t02	AgR036X	393751	409935	-	C05G5.5a	chrX	14756075	14760963	-	Metalloprotease TIKI homolog
AgR036X_g031_t02	AgR036X	398191	426084	+	F56F10.2	chrX	859948	862459	+	hypothetical protein
AgR036X_g032_t02	AgR036X	449200	535946	+	C46H3.2a	chrX	1211770	1230758	-	Caskin-2
AgR036X_g034_t01	AgR036X	547045	548294	-	F42H10.6	chrIII	8478457	8480455	-	esterase
AgR036X_g035_t06	AgR036X	564343	592986	+	F09B9.2a	chrX	10146889	10153142	+	Actin-binding LIM protein 3
AgR036X_g036_t02	AgR036X	605092	619927	+	F57C12.1	chrX	558141	563657	+	Zinc metalloproteinase nas-33
AgR036X_g039_t02	AgR036X	683467	698505	-	F33C8.3	chrX	14726626	14729482	-	cd63 antigen
AgR036X_g041_t01	AgR036X	714907	744926	+	W03F8.5a	chrIV	5173280	5183708	+	Laminin subunit beta-1
AgR036X_g043_t02	AgR036X	757661	783373	-	C42D8.8a	chrX	5112422	5116866	-	Beta-amyloid-like protein
AgR036X_g045_t01	AgR036X	855346	876693	+	C01C4.3a	chrX	3706551	3713382	+	serine threonine-protein kinase
AgR036X_g048_t01	AgR036X	898773	911833	-	K09B11.10	chrIV	13434188	13445375	-	hypothetical protein
AgR036X_g049_t04	AgR036X	913623	936580	-	K09B11.9a	chrIV	13445819	13454954	-	general vesicular transport factor
AgR036X_g052_t01	AgR036X	949668	959870	-	M02B7.5a	chrIV	3807870	3819328	-	iq motif and sec7 domain-containing protein 1
AgR036X_g053_t02	AgR036X	968813	982724	-	T11G6.2a	chrIV	10855497	10858559	-	sugar phosphate exchanger 3
AgR036X_g056_t04	AgR036X	1002429	1012687	-	C02B10.1	chrIV	5086839	5088883	-	Isovaleryl-CoA dehydrogenase
AgR036X_g057_t02	AgR036X	1018574	1023347	+	Y66H1A.5	chrIV	428070	429133	-	hypothetical protein
AgR036X_g059_t02	AgR036X	1041330	1047025	+	B0546.3a	chrIV	3379355	3382834	-	Yippee-like protein 5
AgR036X_g061_t01	AgR036X	1058440	1069203	+	B0546.2a	chrIV	3373387	3378130	-	OTU domain-containing protein 5
AgR036X_g063_t01	AgR036X	1104560	1117931	+	T05A1.3a	chrIV	9560787	9566605	-	Chondroadherin-like protein
AgR036X_g064_t01	AgR036X	1122301	1132189	+	M18.7a	chrIV	12123314	12124599	+	rna binding protein
AgR036X_g065_t01	AgR036X	1133789	1156189	+	M70.4a	chrIV	2253011	2257137	-	Protein O-linked-mannose beta-1,2-N-acetylglucosaminyltransferase 1, partial
AgR036X_g067_t03	AgR036X	1190056	1202391	+	C01B10.8	chrIV	6635039	6638155	+	Methyltransferase-like protein 13
AgR036X_g068_t02	AgR036X	1224673	1260052	+	C01B10.3	chrIV	6619468	6621352	-	type i inositol- -trisphosphate 5-phosphatase
AgR036X_g069_t02	AgR036X	1266384	1285264	-	C17H12.9	chrIV	6812108	6815607	+	Hepatocyte nuclear factor 6
AgR036X_g071_t05	AgR036X	1311664	1375073	-	F47C12.2	chrIV	3989102	4014195	+	von willebrand factor type egf and pentraxin domain-containing protein 1
AgR036X_g072_t01	AgR036X	1316408	1326256	+	W02C12.2a	chrIV	4005494	4007823	-	von willebrand factor type egf and pentraxin domain-containing protein 1
AgR036X_g073_t01	AgR036X	1384666	1395880	+	D2096.2a	chrIV	8379984	8381925	+	PRA1 family protein 3
AgR036X_g075_t02	AgR036X	1406199	1417620	-	ZK829.7	chrIV	11959823	11961535	-	zinc-binding dehydrogenase family protein
AgR036X_g077_t05	AgR036X	1432903	1459072	+	B0513.1a	chrIV	13888089	13893985	+	fez family zinc finger protein 1
AgR036X_g078_t01	AgR036X	1466616	1469543	-	T07C4.5	chrIII	10337840	10339440	+	Transthyretin-like protein 15, partial
AgR036X_g080_t01	AgR036X	1479935	1505186	+	T07A9.3	chrIV	405621	410033	-	Mitogen-activated protein kinase 8
AgR036X_g082_t03	AgR036X	1535210	1549582	+	C05E11.3a	chrX	4578249	4581641	+	lysosomal-associated transmembrane protein
AgR036X_g087_t03	AgR036X	1577861	1589422	-	Y22F5A.1	chrV	10256360	10258654	+	Nuclear hormone receptor family member nhr-213
AgR036X_g088_t01	AgR036X	1599050	1620687	+	Y73B6BL.19	chrIV	6378594	6384070	-	Potassium voltage-gated channel protein Shal
AgR036X_g089_t02	AgR036X	1619394	1625948	-	T19E7.6	chrIV	5667525	5669583	-	Potassium voltage-gated channel protein Shal
AgR036X_g090_t01	AgR036X	1633127	1645661	+	Y116A8C.12	chrIV	16947120	16949734	+	adp-ribosylation factor 6
AgR036X_g096_t02	AgR036X	1707265	1726604	-	T10B10.3	chrX	15178096	15181501	-	pleckstrin-like proteiny domain-containing family m member 2
AgR036X_g097_t01	AgR036X	1728699	1755496	-	T04C10.2a	chrX	14815984	14818507	-	Epsin-2
AgR036X_g099_t02	AgR036X	1757522	1771917	-	F20D1.9	chrX	15002034	15003941	-	Glutamate carrier 1
AgR040X_g004_t02	AgR040X	33325	42551	+	C02F12.7	chrX	3684212	3689205	-	Tag-278
AgR040X_g005_t01	AgR040X	45561	80848	-	C09D1.1a	chrI	4035702	4078806	+	Titin
AgR040X_g006_t01	AgR040X	87056	99466	+	Y102A11A.6	chrX	2031963	2035245	-	Endoplasmic reticulum-Golgi intermediate compartment protein 1
AgR040X_g008_t01	AgR040X	126189	204650	+	R07D5.1a	chrX	15120975	15147742	-	Innexin unc-7
AgR040X_g011_t01	AgR040X	200698	225635	-	H03A11.1	chrX	15209289	15213259	-	Dentin matrix protein 4
AgR040X_g013_t01	AgR040X	282847	290874	+	ZK721.2	chrX	8789456	8790621	+	Troponin I 2, partial
AgR040X_g015_t02	AgR040X	313605	319129	-	H05L03.3	chrX	5904627	5905344	+	hypothetical protein
AgR040X_g020_t01	AgR040X	387034	396322	-	T11G6.8a	chrIV	10861402	10864232	+	Pre-mRNA-splicing factor RBM22
AgR040X_g021_t03	AgR040X	399701	434661	-	T14B4.1	chrII	6736904	6741482	+	Methyltransferase TARBP1
AgR040X_g025_t03	AgR040X	498156	509051	-	F54B11.5	chrX	13594121	13596068	-	RING finger protein 141
AgR040X_g028_t03	AgR040X	529668	539947	-	W06B3.2a	chrX	11997527	12001387	-	Mitogen-activated protein kinase 7
AgR040X_g030_t02	AgR040X	564140	587330	-	C09B8.6a	chrX	6034463	6039496	-	protein lethal essential for life
AgR040X_g032_t02	AgR040X	604985	612737	-	ZC13.4	chrX	892228	898117	-	protein male abnormal 7
AgR040X_g037_t01	AgR040X	648785	655422	+	AC7.1a	chrIV	5112929	5122019	-	substance-p receptor
AgR040X_g039_t01	AgR040X	707740	724048	+	C53D6.2	chrIV	9002839	9005410	-	bone morphogenetic protein 3
AgR040X_g042_t04	AgR040X	762773	789329	-	ZC518.3a	chrIV	12361958	12371852	+	CCR4-NOT transcription complex subunit 6-like protein
AgR040X_g049_t01	AgR040X	890458	902152	+	K04F10.2	chrI	6360844	6364172	+	Protein KIAA0556 homolog
AgR040X_g050_t01	AgR040X	902072	914148	-	T11F8.3a	chrIV	5470185	5473171	+	low-density lipoprotein receptor-related protein 2
AgR040X_g054_t01	AgR040X	978466	987973	+	E01A2.1a	chrI	4140649	4142367	+	Glutamate--cysteine ligase regulatory subunit
AgR040X_g055_t05	AgR040X	995889	1003998	+	R04B3.3	chrX	2473758	2476030	-	ing defective family member (mlt-9)
AgR040X_g060_t07	AgR040X	1043717	1104861	-	F54G2.1a	chrX	2621274	2664373	-	BAI1-associated protein 3, partial
AgR040X_g061_t01	AgR040X	1143164	1156979	+	C09B7.1a	chrX	2673471	2682379	+	5-hydroxytryptamine receptor 7
AgR040X_g062_t02	AgR040X	1157715	1172617	-	T14G11.3	chrX	2682754	2687184	-	Inner membrane protein
AgR040X_g065_t01	AgR040X	1213406	1230261	-	F58G6.4a	chrIV	9658053	9663941	+	Ligand-gated ion channel 50
AgR040X_g070_t01	AgR040X	1266520	1282716	-	Y51H1A.5	chrII	13882705	13888031	+	Histone deacetylase 10
AgR040X_g072_t01	AgR040X	1301338	1305344	+	Y38F2AR.9	chrIV	2388195	2388675	-	Protein transport protein Sec61 subunit beta
AgR040X_g073_t03	AgR040X	1309754	1324080	+	W07E6.1a	chrII	471247	475940	-	Ribosomal RNA methyltransferase, partial
AgR040X_g075_t01	AgR040X	1341526	1352565	-	F11H8.1	chrIII	7021167	7023652	+	nedd8-activating enzyme e1 catalytic subunit
AgR040X_g081_t02	AgR040X	1427014	1432391	-	B0491.4	chrII	11340134	11343530	-	cre-lgc-20 protein
AgR040X_g082_t03	AgR040X	1436459	1446040	-	B0491.5	chrII	11343716	11345743	-	hypothetical protein
AgR040X_g083_t03	AgR040X	1464586	1467793	+	T22D2.1	chrII	2443279	2451130	+	kn motif and ankyrin repeat domain-containing protein 1
AgR040X_g084_t02	AgR040X	1494426	1515897	-	F53G2.4a	chrII	2452970	2458981	-	Reticulocyte-binding protein 2-like protein a
AgR040X_g087_t03	AgR040X	1544244	1568639	-	F31F6.5	chrX	14888488	14894297	+	Patched domain-containing protein 3
AgR040X_g089_t01	AgR040X	1578375	1588406	-	F19C6.3	chrX	10005733	10008755	-	Fibrillin-2
AgR040X_g091_t01	AgR040X	1622184	1637219	+	Y41E3.4a	chrIV	15008503	15013183	-	Glutaminyl-tRNA synthetase
AgR042X_g001_t02	AgR042X	100	24696	+	T08H4.1a	chrII	4100788	4127849	+	Pleckstriny domain-containing family G member 6
AgR042X_g003_t05	AgR042X	87144	112217	+	W09G10.3	chrII	3525172	3528516	-	neurocalcin delta
AgR042X_g004_t04	AgR042X	124837	139633	+	C56E6.2	chrII	6524927	6526333	+	Ras-related protein RABH1C
AgR042X_g006_t03	AgR042X	141146	155032	-	T01B7.3	chrII	8713992	8715013	-	Ras-related protein Rab-21
AgR042X_g016_t02	AgR042X	221931	229681	-	Y38F1A.8	chrII	12997986	13000853	-	Post-GPI attachment to proteins factor 2
AgR042X_g018_t01	AgR042X	239066	247960	+	Y38F1A.9	chrII	13006610	13008164	-	immunoglobulin i-set domain containing protein
AgR042X_g022_t01	AgR042X	283417	294913	+	R08B4.2	chrX	11121916	11125615	-	Aristaless-related homeobox protein
AgR042X_g027_t01	AgR042X	355111	358642	-	C01G6.4	chrII	9271265	9273042	-	ring finger protein 11
AgR042X_g030_t05	AgR042X	372889	528212	-	F57F10.1a	chrII	6147133	6157176	+	Sodium bicarbonate transporter-like protein 11
AgR042X_g041_t26	AgR042X	813541	877375	-	ZC101.1	chrII	14675263	14684296	-	Basement membrane proteoglycan, partial
AgR042X_g043_t01	AgR042X	829530	838604	+	ZC101.3	chrII	14678457	14681145	+	protein-cysteine n-palmitoyltransferase hhat
AgR042X_g045_t03	AgR042X	908817	942643	+	T13C2.6a	chrII	6783427	6788255	+	Very low-density lipoprotein receptor
AgR042X_g046_t02	AgR042X	945781	952518	-	T23G7.5a	chrII	9177338	9178585	+	RNA/RNP complex-1-interacting phosphatase
AgR042X_g048_t01	AgR042X	954420	982714	-	T21B10.3	chrII	8934382	8939033	+	hypothetical protein
AgR042X_g050_t01	AgR042X	985002	992043	-	C23H3.2a	chrII	62405	64340	+	hypothetical protein
AgR042X_g053_t01	AgR042X	1012562	1028443	-	ZK1321.4a	chrII	9770759	9773887	-	alp enigma encoding family member (alp-1)
AgR042X_g056_t01	AgR042X	1088332	1101815	+	C09F9.2	chrII	14705512	14712800	+	zonadhesin
AgR042X_g059_t01	AgR042X	1160000	1165532	-	T24B8.2	chrII	9054978	9056504	+	Charged multivesicular body protein 7
AgR042X_g063_t01	AgR042X	1192079	1197264	+	R08A2.5a	chrV	14712663	14714072	+	hypothetical protein
AgR042X_g064_t01	AgR042X	1197502	1202967	-	ZC412.1a	chrV	14852826	14858596	-	Neuropeptide Y receptor type 1
AgR042X_g065_t01	AgR042X	1213495	1225332	-	F57F5.3	chrV	12004616	12006605	-	hypothetical protein
AgR042X_g074_t01	AgR042X	1360540	1370492	-	C06H2.5a	chrV	11138508	11140323	+	cre-glb-3 protein
AgR042X_g077_t05	AgR042X	1438598	1455304	-	F56D2.5	chrIII	5578435	5581343	-	e3 ubiquitin-protein ligase rnf14
AgR042X_g081_t09	AgR042X	1491850	1501688	+	Y46G5A.4	chrII	12726963	12736910	-	u5 small nuclear ribonucleoprotein helicase
AgR048X_g008_t02	AgR048X	81077	111972	+	B0496.3a	chrIV	7428926	7444648	+	NUAK family SNF1-like kinase 1
AgR048X_g011_t02	AgR048X	163248	171817	-	T04G9.5	chrX	767023	768069	-	Translocon-associated protein subunit beta
AgR048X_g013_t03	AgR048X	171333	181954	+	T04G9.3	chrX	768596	770776	+	Vesicular integral-membrane protein VIP36
AgR048X_g015_t01	AgR048X	201851	216979	-	Y73E7A.4	chrI	1594659	1596184	-	Complexin-1
AgR048X_g016_t01	AgR048X	228425	234242	+	F47G3.4	chrX	2381581	2382335	+	zonadhesin
AgR048X_g018_t02	AgR048X	236516	249220	-	C35A11.4	chrV	5389480	5393148	-	solute carrier family facilitated glucose transporter member 1
AgR048X_g020_t02	AgR048X	264830	273492	+	Y53C12C.1	chrII	9826513	9827926	-	Paired box protein Pax-2-A
AgR048X_g021_t02	AgR048X	282888	296987	+	C24H10.5	chrX	5074399	5078120	-	Calmodulin, partial
AgR048X_g022_t01	AgR048X	311048	315854	+	R11G1.3	chrX	3632367	3633747	-	Glutathione S-transferase 1
AgR048X_g023_t01	AgR048X	314883	326099	-	C56G3.1a	chrX	7377302	7388400	+	G-protein coupled receptor
AgR048X_g024_t07	AgR048X	397359	407163	+	B0198.2a	chrX	12028711	12031457	+	LINE-1 reverse transcriptase
AgR048X_g025_t01	AgR048X	392433	412531	-	K02D3.2	chrX	13708619	13711964	-	StAR-related lipid transfer protein 5
AgR048X_g026_t04	AgR048X	414296	426374	-	R07E3.5a	chrX	10324183	10327642	-	glycerol-3-phosphate acyltransferase 3
AgR048X_g027_t02	AgR048X	429687	435819	+	M01G5.6	chrIII	1495434	1496027	-	cre-ave-1 protein
AgR048X_g028_t01	AgR048X	439940	456532	+	Y34B4A.8a	chrX	5271843	5275282	-	rho gtpase-activating protein 17
AgR048X_g030_t03	AgR048X	459123	469728	-	F46F6.1a	chrX	10373235	10374838	-	DENN domain-containing protein 1A
AgR048X_g032_t03	AgR048X	491386	502184	-	Y57G11C.47	chrIV	14904994	14909686	-	nicotinamidase
AgR048X_g034_t02	AgR048X	523248	564875	-	Y67D8C.10a	chrIV	3111738	3126232	-	Plasma membrane calcium-transporting ATPase 3
AgR048X_g043_t01	AgR048X	618841	635463	-	K02D7.4	chrIV	315056	320605	-	Microsomal triglyceride transfer protein large subunit
AgR048X_g044_t03	AgR048X	637998	640384	+	K02F6.1	chrII	2553962	2556313	+	Retrotransposable element Tf2 155 kDa protein type 1
AgR048X_g050_t04	AgR048X	740306	747644	+	Y38F1A.5	chrII	12980591	12993118	+	G1/S-specific cyclin-D1
AgR048X_g053_t01	AgR048X	815587	827320	+	D2013.2	chrII	9319865	9321888	+	WD repeat and FYVE domain-containing protein 2
AgR048X_g054_t02	AgR048X	824464	834989	-	Y57A10A.25	chrII	12251667	12256628	-	Target of EGR1 protein 1
AgR048X_g056_t01	AgR048X	836082	846232	-	Y57A10A.10	chrII	12256950	12269706	-	Trimeric intracellular cation channel type B
AgR048X_g057_t01	AgR048X	852595	859571	+	ZK673.7	chrII	10466852	10468344	+	Troponin C, isoform 2
AgR048X_g059_t04	AgR048X	883047	886693	-	F56D1.1	chrII	5478578	5480490	+	Zinc finger protein
AgR048X_g060_t01	AgR048X	887004	916506	-	F56D1.2	chrII	5475409	5478524	+	28S ribosomal protein S16, partial
AgR048X_g068_t02	AgR048X	1003670	1012378	+	C24B5.2a	chrV	9175798	9177997	+	Spastin, partial
AgR048X_g069_t02	AgR048X	1015115	1023317	+	W02H5.2	chrV	2638890	2646594	+	hypothetical protein
AgR051X_g017_t02	AgR051X	87429	163517	+	ZK669.1a	chrII	7912093	7928694	-	Rho GTPase-activating protein 29
AgR051X_g018_t04	AgR051X	172075	196355	+	T07D4.4a	chrII	8884908	8889673	+	ATP-dependent RNA helicase DDX19B
AgR051X_g019_t02	AgR051X	209522	280425	+	B0457.1a	chrII	8896841	8908666	+	Latrophilin-1
AgR051X_g022_t03	AgR051X	307709	315118	+	F40F8.7	chrII	11150391	11152600	-	zinc finger protein
AgR051X_g025_t06	AgR051X	345636	356970	-	Y105C5B.21a	chrIV	15997858	16026847	-	Juxtamembrane domain-associated catenin
AgR051X_g027_t02	AgR051X	384947	405310	-	ZK795.1	chrIV	12548129	12554681	+	Inositol polyphosphate multikinase
AgR051X_g028_t03	AgR051X	406910	413838	-	F53B2.6	chrIV	12542034	12545729	+	hsn abnormal migration family member (ham-1)
AgR051X_g030_t04	AgR051X	440992	473039	+	F42A6.9	chrIV	3342519	3350027	-	ELKS/Rab6-interacting/CAST family member 1
AgR051X_g032_t06	AgR051X	501393	515901	-	T19E7.2a	chrIV	5651087	5660523	-	protein skinhead-1
AgR051X_g033_t01	AgR051X	517509	524722	-	T19E7.3a	chrIV	5661141	5664425	-	Beclin-1-like protein
AgR051X_g034_t06	AgR051X	539762	561734	-	Y116A8C.36a	chrIV	17119684	17126266	+	Intersectin-1
AgR051X_g036_t03	AgR051X	566960	578436	-	C44C8.6	chrIV	885346	890175	+	MAP kinase-activated protein kinase 2
AgR051X_g039_t01	AgR051X	590837	616414	-	F12F6.6	chrIV	11561986	11566194	-	protein transport protein sec24c
AgR051X_g043_t02	AgR051X	665686	675742	-	C36H8.2	chrIV	12746584	12749721	+	Innexin-6
AgR051X_g048_t08	AgR051X	723000	731236	+	F42G8.12	chrIV	8133789	8136055	-	Cytochrome b-c1 complex subunit Rieske
AgR051X_g049_t06	AgR051X	732156	746390	+	F42G8.5	chrIV	8136325	8139087	+	cre-islo-1 protein
AgR051X_g050_t05	AgR051X	759286	778592	+	F12F6.5a	chrIV	11570500	11578699	+	SLIT-ROBO Rho GTPase-activating protein 1
AgR051X_g052_t02	AgR051X	829044	847487	-	F45E4.11	chrIV	7651442	7654295	+	Transporter
AgR051X_g055_t02	AgR051X	857787	875649	-	Y73B6A.5a	chrIV	6742539	6747458	-	Raf serine/threonine-protein kinase
AgR051X_g057_t02	AgR051X	889251	922498	-	C26H9A.2a	chrIV	12653403	12674769	+	WD repeat and FYVE domain-containing protein 3
AgR072X_g005_t02	AgR072X	28308	42428	-	C42C1.15	chrIV	12287928	12289392	+	Erlin-2
AgR072X_g008_t03	AgR072X	77637	93322	+	ZK829.6	chrIV	11957547	11959804	-	putative queuine trna-ribosyltransferase
AgR072X_g011_t01	AgR072X	101486	113986	+	T20D3.7a	chrIV	9339403	9341790	-	Vacuolar protein sorting-associated protein 26
AgR072X_g013_t05	AgR072X	156582	166986	-	W03F8.3a	chrIV	5185333	5189096	+	Peptide chain release factor 1
AgR079X_g002_t02	AgR079X	9190	16049	+	Y94H6A.9a	chrIV	2720323	2725858	-	NSFL1 cofactor p47
AgR079X_g003_t01	AgR079X	19266	19843	+	Y94H6A.8	chrIV	2716661	2719834	-	NADH dehydrogenase ubiquinone 1 alpha subcomplex subunit 12
AgR079X_g004_t01	AgR079X	20301	33477	-	K08E3.6	chrIII	13768542	13771242	-	Rac GTPase-activating protein 1
AgR079X_g005_t01	AgR079X	45543	49801	+	K08E7.3	chrIV	12567842	12570622	+	DEP domain-containing protein 1A
AgR079X_g014_t01	AgR079X	98014	102815	-	T05A7.7	chrII	4679667	4681324	-	prion-like domain-bearing protein 25
AgR093X_g003_t04	AgR093X	29443	67998	+	T19B10.6	chrV	11237438	11238971	-	zinc finger protein
AgR104X_g003_t06	AgR104X	43082	56514	+	D2013.5	chrII	9324874	9329665	+	Dynamin-like 120 kDa protein
AgR130X_g001_t05	AgR130X	8118	30472	-	F41D9.1	chrX	8378557	8382700	+	Small G protein signaling modulator 3
AgR157X_g001_t02	AgR157X	11187	24696	-	K07C5.3	chrV	10343032	10345489	+	DNA ligase 3
AgR163X_g001_t01	AgR163X	15008	18233	+	ZK1058.6	chrIII	3922443	3923869	+	Bifunctional nitrilase/nitrile hydratase NIT4A
AgR175X_g001_t01	AgR175X	442	4240	-	Y51A2D.15a	chrV	18592754	18614101	+	Daple-like protein, partial
AgR179X_g001_t01	AgR179X	1586	16265	-	C08H9.2a	chrII	9886557	9891081	-	Vigilin
AgR199X_g001_t01	AgR199X	1657	14073	-	T06H11.1a	chrX	10104612	10109868	-	uncoordinated protein 58
AgR201X_g001_t02	AgR201X	945	6286	-	C32D5.9	chrII	6346960	6347719	-	Protein lgg-1
AgR224X_g001_t01	AgR224X	69	4201	-	Y43F8B.2a	chrV	19519925	19533110	-	GSK3-beta interaction protein
AgR257X_g001_t01	AgR257X	326	3081	+	F52B11.2a	chrIV	14083318	14084695	+	Phosphomannomutase
