# Supplementary material for: Comparative genome analysis of programmed DNA elimination in nematodes
Source: HighWire-hosted journal article supplement (doi:10.1101/gr.225730.117), 2017-11-08
Supplement: Supplemental_Table_S7.xlsx [file Supplemental_Table_S7.xlsx]

## Sheet: gene_models_comparison
Chromosome	Start	End	Gene_name	Strand	Annotation	New to Wang 2012	New to Jex 2012	New to both	Eliminated	Matched_genes in Wang 2012	Matched_genes # in Wang 2012	Matched_genes in Jex 2011	Matched_genes # in Jex 2011
AgB01	13603	14939	AgB01_g001	.	hypothetical protein	Y	Y	Y	N
AgB01	15686	25796	AgB01_g002	-	methyltransferase-like protein 13	N	N	N	N	ASU_06520	1	GS_08982,GS_09661	2
AgB01	32651	35372	AgB01_g003	-	methyltransferase-like protein 13	Y	Y	Y	N
AgB01	40564	48082	AgB01_g004	-	REST corepressor	Y	Y	Y	N
AgB01	49194	52881	AgB01_g005	-	methyltransferase-like protein 13	Y	Y	Y	N
AgB01	59356	60933	AgB01_g006	+	histidine acid phosphatase family protein	Y	Y	Y	N
AgB01	93192	109560	AgB01_g007	+	methyltransferase-like protein 13	N	N	N	N	ASU_06518,ASU_06522	2	GS_12824,GS_16914,L4_02205	3
AgB01	110837	112536	AgB01_g008	-	hypothetical protein	N	Y	N	N	ASU_06522	1
AgB01	122269	129717	AgB01_g009	+	aquaporin-10	N	N	N	N	ASU_06524,ASU_06525	2	GS_07032,GS_16318,GS_17885,GS_24374	4
AgB01	138061	141965	AgB01_g010	-	hypothetical protein	N	N	N	N	ASU_06525	1	GS_07032	1
AgB01	144593	148869	AgB01_g011	+	p40	N	N	N	N	ASU_06526	1	GS_07829	1
AgB01	196147	224942	AgB01_g012	+	Nuclear hormone receptor family member nhr-91	N	N	N	N	ASU_00073	1	GS_21412	1
AgB01	220777	226519	AgB01_g013	-	Nuclear hormone receptor family member nhr-91	Y	Y	Y	N
AgB01	227945	229414	AgB01_g014	.	hypothetical protein	Y	Y	Y	N
AgB01	231408	234773	AgB01_g015	-	hypothetical protein	N	N	N	N	ASU_00074	1	L4_01652	1
AgB01	234940	246267	AgB01_g016	+	calponin-like protein ov9m	N	N	N	N	ASU_00075	1	GS_09957	1
AgB01	238768	241167	AgB01_g017	-	Uncharacterized protein C53C9.2	N	N	N	N	ASU_00075	1	GS_09957	1
AgB01	249098	255577	AgB01_g018	-	Enoyl-CoA hydratase	N	N	N	N	ASU_00076	1	GS_10850	1
AgB01	260533	273970	AgB01_g019	+	Valyl-tRNA synthetase	N	N	N	N	ASU_00077	1	GS_21362	1
AgB01	281194	289497	AgB01_g020	+	Cap-specific mRNA (nucleoside-2'-O-)-methyltransferase 2	N	N	N	N	ASU_00078	1	GS_02172	1
AgB01	291510	296041	AgB01_g021	+	Cap-specific mRNA (Nucleoside-2'-O-)-methyltransferase 2	N	Y	N	N	ASU_00079	1
AgB01	305384	308886	AgB01_g022	+	hypothetical protein	N	N	N	N	ASU_00080	1	GS_07486	1
AgB01	319633	390130	AgB01_g023	+	Protein phosphatase 1L	N	N	N	N	ASU_00081,ASU_00082,ASU_00083	3	GS_04924,GS_07259	2
AgB01	390733	395195	AgB01_g024	+	papilin	Y	Y	Y	N
AgB01	395956	406694	AgB01_g025	-	sentrin-specific protease 7	Y	N	N	N			GS_12526,GS_20779	2
AgB01	431975	442342	AgB01_g026	+	Hemicentin-1, partial	N	N	N	N	ASU_14046	1	GS_05887	1
AgB01	454493	466494	AgB01_g027	-	1-acyl-sn-glycerol-3-phosphate acyltransferase acl-12	N	N	N	N	ASU_14047	1	GS_13778	1
AgB01	478592	497525	AgB01_g028	-	Cell death abnormality protein 1	N	N	N	N	ASU_13483	1	GS_22022	1
AgB01	501301	507847	AgB01_g029	-	Cell death abnormality protein 1	Y	Y	Y	N
AgB01	515921	524306	AgB01_g030	-	hypothetical protein	N	N	N	N	ASU_13482	1	GS_02040,GS_05790	2
AgB01	526673	532665	AgB01_g031	-	spry domain-containing protein 7	N	N	N	N	ASU_13481	1	GS_08043	1
AgB01	538902	555909	AgB01_g032	+	hypothetical protein	N	N	N	N	ASU_12763,ASU_13479	2	GS_01062,GS_14613,GS_18663	3
AgB01	534277	538330	AgB01_g033	-	hypothetical protein	N	Y	N	N	ASU_13480	1
AgB01	536469	538414	AgB01_g034	+	hypothetical protein	N	Y	N	N	ASU_13480	1
AgB01	559450	572145	AgB01_g035	+	oxysterol-binding protein 1	N	N	N	N	ASU_12762	1	GS_05811,GS_23293	2
AgB01	574989	575841	AgB01_g036	-	Oxysterol-binding protein 1, partial	N	N	N	N	ASU_12761	1	GS_00194,GS_13252	2
AgB01	588616	626522	AgB01_g037	-	Dedicator of cytokinesis protein 11	N	N	N	N	ASU_12760	1	GS_04483,GS_13952,GS_20747	3
AgB01	616688	617175	AgB01_g038	.	Dedicator of cytokinesis protein 11	Y	Y	Y	N
AgB01	648394	654892	AgB01_g039	+	Phosphatidylinositol transfer protein beta isoform	N	Y	N	N	ASU_14960	1
AgB01	655970	663298	AgB01_g040	+	hypothetical protein	Y	Y	Y	N
AgB01	668039	681213	AgB01_g041	-	Tau-tubulin kinase 2	N	N	N	N	ASU_12929	1	GS_00880,GS_11813,GS_18829	3
AgB01	681620	682608	AgB01_g042	-	hypothetical protein	N	Y	N	N	ASU_12930	1
AgB01	683381	686279	AgB01_g043	-	hypothetical protein	Y	Y	Y	N
AgB01	684434	686274	AgB01_g044	.	hypothetical protein	Y	Y	Y	N
AgB01	688829	704334	AgB01_g045	-	Transporter, partial	N	N	N	N	ASU_06775,ASU_06776	2	GS_07160,GS_13965	2
AgB01	709773	722577	AgB01_g046	+	Dolichyl-diphosphooligosaccharide--protein glycosyltransferase subunit 2	N	N	N	N	ASU_06774	1	GS_04292	1
AgB01	724001	732216	AgB01_g047	+	Acyl-CoA synthetase family member 3	N	N	N	N	ASU_06773	1	GS_11521,GS_18203	2
AgB01	754789	771611	AgB01_g048	+	Yorkie	N	N	N	N	ASU_06772	1	GS_18665	1
AgB01	772180	772823	AgB01_g049	.	hypothetical protein	Y	Y	Y	N
AgB01	777949	813077	AgB01_g050	-	Protein FAM43A	N	N	N	N	ASU_15047	1	GS_15582	1
AgB01	837674	846680	AgB01_g051	-	Zinc finger HIT domain-containing protein 1	N	N	N	N	ASU_09245	1	GS_10101	1
AgB01	847241	857495	AgB01_g052	+	UBX domain-containing protein 7	N	N	N	N	ASU_09246,ASU_15230	2	GS_13008	1
AgB01	863221	866195	AgB01_g053	-	beta-lactamase domain-containing protein 2	Y	Y	Y	N
AgB01	873238	880689	AgB01_g054	+	degenerin del-1	N	Y	N	N	ASU_14228	1
AgB01	882421	887413	AgB01_g055	-	BTB/POZ domain-containing protein KCTD16	N	N	N	N	ASU_14227	1	GS_16648	1
AgB01	892673	908099	AgB01_g056	-	hypothetical protein	N	N	N	N	ASU_14225,ASU_14226,ASU_15041,ASU_15363	4	GS_12293,GS_24388	2
AgB01	907421	909291	AgB01_g057	+	hypothetical protein	N	N	N	N	ASU_14225,ASU_14226,ASU_15041,ASU_15363	4	GS_12293,GS_24388	2
AgB01	905465	906488	AgB01_g058	.	hypothetical protein	Y	Y	Y	N
AgB01	957215	963875	AgB01_g059	+	hypothetical protein	N	Y	N	N	ASU_12308	1
AgB01	968391	1000716	AgB01_g060	-	ligand-gated ion channel 50	N	N	N	N	ASU_12306,ASU_12307	2	GS_12573,GS_14046	2
AgB01	1015252	1022512	AgB01_g061	-	Prolactin regulatory element-binding protein	N	N	N	N	ASU_12304,ASU_12305,ASU_12981	3	GS_01697,GS_08335,GS_10555,GS_15965	4
AgB01	1024140	1027265	AgB01_g062	+	Prolactin regulatory element-binding protein	Y	N	N	N			GS_02629	1
AgB01	1028435	1034249	AgB01_g063	+	Ankyrin repeat domain-containing protein 49	N	N	N	N	ASU_12982	1	GS_07871	1
AgB01	1034399	1040038	AgB01_g064	+	ZDHHC-type palmitoyltransferase 2	N	N	N	N	ASU_12983	1	GS_13184	1
AgB01	1040270	1053476	AgB01_g065	-	85 kDa calcium-independent phospholipase A2	N	N	N	N	ASU_12984	1	GS_05107,GS_07447	2
AgB01	1054381	1062232	AgB01_g066	-	Protein FAM114A2	N	N	N	N	ASU_12985	1	GS_05107	1
AgB01	1074106	1083892	AgB01_g067	+	carrier triple repeat protein 1	N	N	N	N	ASU_12986	1	GS_21382	1
AgB01	1112391	1118378	AgB01_g068	+	hypothetical protein	N	N	N	N	ASU_08211	1	GS_16567	1
AgB01	1093633	1096843	AgB01_g069	+	hypothetical protein	Y	N	N	N			GS_00077	1
AgB01	1154820	1156276	AgB01_g070	-	spermatogenesis-associated protein 13	Y	Y	Y	N
AgB01	1166093	1170905	AgB01_g071	-	acetylcholine receptor subunit alpha-type deg-3	N	N	N	N	ASU_08212,ASU_08213	2	GS_00256,GS_06558	2
AgB01	1178345	1180892	AgB01_g072	+	hypothetical protein	N	N	N	N	ASU_08214	1	GS_06470,GS_14877	2
AgB01	1183167	1193424	AgB01_g073	-	Propionyl-CoA carboxylase alpha chain	N	N	N	N	ASU_08215	1	GS_01900	1
AgB01	1194127	1194558	AgB01_g074	-	Propionyl-CoA carboxylase alpha chain	Y	Y	Y	N
AgB01	1194887	1199070	AgB01_g075	-	Propionyl-CoA carboxylase alpha chain	Y	Y	Y	N
AgB01	1196421	1196799	AgB01_g076	.	hypothetical protein	Y	Y	Y	N
AgB01	1211436	1213325	AgB01_g077	+	hypothetical protein	Y	Y	Y	N
AgB01	1210644	1214706	AgB01_g078	-	G-protein coupled receptor	Y	N	N	N			GS_03833	1
AgB01	1217331	1223845	AgB01_g079	-	Putative G-protein coupled receptor F59B2.13	Y	Y	Y	N
AgB01	1228201	1230382	AgB01_g080	+	hypothetical protein	Y	Y	Y	N
AgB01	1240592	1253638	AgB01_g081	+	Uncharacterized protein tag-51	N	N	N	N	ASU_08218	1	GS_10615,Lung_00940	2
AgB01	1252238	1256773	AgB01_g082	-	hypothetical protein	N	N	N	N	ASU_08218	1	GS_10615	1
AgB01	1261034	1264600	AgB01_g083	+	hypothetical protein	N	N	N	N	ASU_08219	1	GS_18269	1
AgB01	1267812	1271070	AgB01_g084	+	U6 snRNA-associated Sm-like protein LSm2	N	N	N	N	ASU_08220	1	GS_09881	1
AgB01	1290883	1293978	AgB01_g085	+	hypothetical protein	N	N	N	N	ASU_08221	1	GS_08768,GS_21698	2
AgB01	1292696	1301575	AgB01_g086	-	hypothetical protein	N	N	N	N	ASU_08222	1	GS_17191,GS_21698	2
AgB01	1303671	1312305	AgB01_g087	-	Glycogenin-1	N	N	N	N	ASU_08223	1	GS_08322	1
AgB01	1335325	1336358	AgB01_g088	.	hypothetical protein	Y	Y	Y	N
AgB01	1341975	1405301	AgB01_g089	-	G-protein coupled receptor, partial	N	N	N	N	ASU_12287	1	L3E_00731	1
AgB01	1345832	1351063	AgB01_g090	-	putative g-protein coupled receptor	N	Y	N	N	ASU_12288	1
AgB01	1374740	1377547	AgB01_g091	+	fog-3	Y	Y	Y	N
AgB01	1400888	1403074	AgB01_g092	.	hypothetical protein	Y	Y	Y	N
AgB01	1411484	1420375	AgB01_g093	-	ubiquinone biosynthesis protein coq	N	N	N	N	ASU_12283,ASU_12284,ASU_12285,ASU_12286	4	GS_11279,GS_18740,GS_19798	3
AgB01	1418096	1428186	AgB01_g094	+	dna polymerase epsilon subunit 3	N	N	N	N	ASU_12284	1	GS_06160,GS_11279,GS_18740	3
AgB01	1429010	1436282	AgB01_g095	-	Translation initiation factor eIF-2B subunit delta	N	N	N	N	ASU_12283	1	GS_12100	1
AgB01	1441567	1450305	AgB01_g096	-	Neuropeptide FF receptor 2	N	N	N	N	ASU_12658	1	GS_14587	1
AgB01	1530158	1537422	AgB01_g097	-	wd repeat-containing protein 47	N	N	N	N	ASU_02732	1	GS_21384	1
AgB01	1547368	1552904	AgB01_g098	+	hypothetical protein	N	N	N	N	ASU_02733	1	GS_12981	1
AgB01	1555999	1570588	AgB01_g099	+	letm1 and ef-hand domain-containing protein	N	N	N	N	ASU_02734	1	GS_02438,GS_04137,GS_20099	3
AgB01	1585479	1601564	AgB01_g100	-	Suppressor APC domain-containing protein 2	N	N	N	N	ASU_02735	1	GS_02601,GS_04137,GS_16762	3
AgB01	1575061	1580853	AgB01_g101	+	cre-nlp-2 protein	N	N	N	N	ASU_02736	1	GS_09766	1
AgB01	1611593	1617325	AgB01_g102	-	Metal tolerance protein 7	N	N	N	N	ASU_02738	1	GS_19867	1
AgB01	1636187	1645524	AgB01_g103	+	FMRFamide-like neuropeptides	N	N	N	N	ASU_02739	1	GS_11989,GS_16229	2
AgB01	1644364	1654109	AgB01_g104	-	RecName: Full=FMRFamide-like neuropeptides; Contains: RecName: Full=Neuropeptide AF10; AltName: Full=GFGDEMSMPGVLRF-amide; Contains: RecName: Full=Neuropeptide AF20; AltName: Full=GMPGVLRF-amide; Contains: RecName: Full=Neuropeptide AF3; AltName: Full=AVPGVLRF-amide; Contains: RecName: Full=Neuropeptide AF4; AltName: Full=GDVPGVLRF-amide; Contains: RecName: Full=Neuropeptide AF13; AltName: Full=S…	Y	Y	Y	N
AgB01	1649498	1662149	AgB01_g105	+	Poly(U)-specific endoribonuclease	N	N	N	N	ASU_02740	1	GS_22743	1
AgB01	1671184	1684496	AgB01_g106	+	Zinc finger protein ZIC 3	N	N	N	N	ASU_02741	1	GS_01779,GS_03839	2
AgB01	1690752	1700191	AgB01_g107	-	hypothetical protein	N	N	N	N	ASU_02742	1	GS_07449,GS_13143	2
AgB01	1701254	1704567	AgB01_g108	+	Serine/threonine-protein kinase Nek7	N	N	N	N	ASU_02743	1	GS_10043	1
AgB01	1705318	1711645	AgB01_g109	+	Serine/threonine-protein kinase Nek7	N	N	N	N	ASU_02743	1	GS_10043	1
AgB01	1712068	1724728	AgB01_g110	+	warthog protein 4	N	N	N	N	ASU_02744	1	GS_03886	1
AgB01	1722022	1727990	AgB01_g111	-	propionyl- carboxylase beta	N	N	N	N	ASU_02745	1	GS_13055	1
AgB01	1728055	1728442	AgB01_g112	.	Propionyl-CoA carboxylase beta chain	Y	Y	Y	N
AgB01	1728676	1734022	AgB01_g113	-	Propionyl-CoA carboxylase beta chain	Y	Y	Y	N
AgB01	1746886	1753535	AgB01_g114	+	hypothetical protein	N	N	N	N	ASU_02746	1	GS_11213,GS_22425	2
AgB01	1754738	1763519	AgB01_g115	-	hypothetical protein	N	N	N	N	ASU_02747,ASU_02748	2	GS_22425	1
AgB01	1765015	1778654	AgB01_g116	+	m-phase mpp8	N	N	N	N	ASU_02749	1	GS_08793	1
AgB01	1787264	1787647	AgB01_g117	.	putative elongation factor 1-beta 1-delta 2	Y	Y	Y	N
AgB01	1833833	1851155	AgB01_g118	+	Gonadotropin-releasing hormone receptor	N	Y	N	N	ASU_02751	1
AgB01	1858914	1860690	AgB01_g119	-	serotonin receptor	N	N	N	N	ASU_02752	1	GS_02746	1
AgB01	1865213	1867030	AgB01_g120	-	Alpha-2A adrenergic receptor	N	N	N	N	ASU_02753	1	GS_11328	1
AgB01	1898005	1906955	AgB01_g121	-	hypothetical protein	N	N	N	N	ASU_02754	1	GS_03208,GS_16628,GS_22090	3
AgB01	1941165	1942201	AgB01_g122	+	hypothetical protein	Y	Y	Y	N
AgB01	1965651	1968899	AgB01_g123	+	nuclear hormone receptor family member nhr-136	N	N	N	N	ASU_02755,ASU_02756	2	GS_13710,GS_18371	2
AgB01	1957659	1962884	AgB01_g124	+	Nuclear hormone receptor family member nhr-136	N	N	N	N	ASU_02756	1	GS_18371	1
AgB01	1980630	2001563	AgB01_g125	+	Nuclear hormone receptor family member nhr-136	N	N	N	N	ASU_02757,ASU_02758	2	GS_00287,GS_08098,GS_13726,GS_18915	4
AgB01	2005245	2007537	AgB01_g126	+	Trans-2-enoyl-CoA reductase 2	Y	Y	Y	N
AgB01	2009000	2015575	AgB01_g127	+	cuticle collagen 6	N	N	N	N	ASU_02759,ASU_02760	2	GS_11697	1
AgB01	2018584	2019960	AgB01_g128	+	hypothetical protein	N	N	N	N	ASU_02761	1	GS_17655	1
AgB01	2023365	2027144	AgB01_g129	+	hypothetical protein	N	Y	N	N	ASU_02762	1
AgB01	2029599	2046213	AgB01_g130	-	neuroligin-1	N	N	N	N	ASU_02763	1	GS_21277	1
AgB01	2046059	2047410	AgB01_g131	+	Neuroligin-1, partial	Y	Y	Y	N
AgB01	2048874	2053920	AgB01_g132	-	Neuroligin-1, partial	N	N	N	N	ASU_02763	1	GS_21277	1
AgB01	2080450	2083857	AgB01_g133	+	hypothetical protein	N	N	N	N	ASU_02764	1	GS_00618	1
AgB01	2092106	2094216	AgB01_g134	+	hypothetical protein	N	N	N	N	ASU_02766,ASU_02767,ASU_02768,ASU_02769	4	GS_15770	1
AgB01	2092106	2095569	AgB01_g135	-	hypothetical protein	N	Y	N	N	ASU_02766,ASU_02767	2
AgB01	2128235	2168472	AgB01_g136	+	nuclear hormone receptor family member nhr-1	N	N	N	N	ASU_02770	1	GS_12237,GS_19606,Liv_02273	3
AgB01	2165340	2170023	AgB01_g137	-	hypothetical protein	Y	Y	Y	N
AgB01	2172234	2177351	AgB01_g138	-	28s ribosomal protein	N	N	N	N	ASU_02771	1	GS_08633	1
AgB01	2181844	2187507	AgB01_g139	-	pre-mrna-processing factor 6	N	N	N	N	ASU_02772	1	GS_00550,GS_14168	2
AgB01	2187908	2197860	AgB01_g140	-	Pre-mRNA-processing factor 6	N	N	N	N	ASU_02772	1	GS_14168	1
AgB01	2195084	2198893	AgB01_g141	.	pre-mrna-processing factor 6	Y	Y	Y	N
AgB01	2205948	2229778	AgB01_g142	+	guanylate cyclase receptor-type gcy-1	N	N	N	N	ASU_00787	1	GS_15588,GS_22438	2
AgB01	2209246	2209605	AgB01_g143	.	hypothetical protein	Y	Y	Y	N
AgB01	2245150	2248239	AgB01_g144	-	cyclic amp-dependent transcription factor atf-6 alpha	N	N	N	N	ASU_00786	1	GS_19112	1
AgB01	2249297	2260258	AgB01_g145	+	Cytochrome b5	N	N	N	N	ASU_00785	1	GS_08927	1
AgB01	2261094	2265485	AgB01_g146	-	Golgi SNAP receptor complex member 2	N	N	N	N	ASU_00784	1	GS_22471	1
AgB01	2268699	2278437	AgB01_g147	-	Pappalysin-1, partial	Y	N	N	N			GS_03568	1
AgB01	2288921	2292892	AgB01_g148	-	hypothetical protein	Y	N	N	N			GS_06722	1
AgB01	2302843	2304672	AgB01_g149	+	Integrator complex subunit 2	Y	Y	Y	N
AgB01	2306498	2313501	AgB01_g150	+	integrator complex subunit 2	Y	N	N	N			GS_20303	1
AgB01	2316159	2331498	AgB01_g151	+	protein gtlf3b	N	N	N	N	ASU_13200	1	GS_02780,GS_03894,GS_13330	3
AgB01	2340591	2355374	AgB01_g152	+	TRPL translocation defect protein 14	N	N	N	N	ASU_13201,ASU_13202	2	GS_22835	1
AgB01	2352279	2355374	AgB01_g153	-	TRPL translocation defect protein 14	N	Y	N	N	ASU_13202	1
AgB01	2355791	2356340	AgB01_g154	-	hypothetical protein	Y	Y	Y	N
AgB01	2359960	2360253	AgB01_g155	+	hypothetical protein	Y	Y	Y	N
AgB01	2370212	2370517	AgB01_g156	+	homeobox-containing protein 1	Y	Y	Y	N
AgB01	2373766	2374084	AgB01_g157	.	hypothetical protein	Y	Y	Y	N
AgB01	2374412	2375483	AgB01_g158	.	hypothetical protein	Y	Y	Y	N
AgB01	2377111	2382637	AgB01_g159	+	hypothetical protein	Y	Y	Y	N
AgB01	2389646	2394945	AgB01_g160	-	Putative glycosyltransferase C06E1.7	Y	Y	Y	N
AgB01	2401480	2417061	AgB01_g161	+	ATP-binding cassette sub-family F member 1	Y	N	N	N			GS_01526,GS_20564	2
AgB01	2417747	2422902	AgB01_g162	+	hypothetical protein	N	N	N	N	ASU_01847	1	GS_06729	1
AgB01	2423228	2425695	AgB01_g163	.	hypothetical protein	Y	Y	Y	N
AgB01	2428473	2429050	AgB01_g164	.	hypothetical protein	Y	Y	Y	N
AgB01	2455768	2466459	AgB01_g165	+	transmembrane protein	N	N	N	N	ASU_01846	1	GS_15130	1
AgB01	2468095	2482866	AgB01_g166	+	o-phosphoseryl-trna selenium transferase	N	N	N	N	ASU_01845	1	GS_20305	1
AgB01	2473584	2482414	AgB01_g167	+	O-phosphoseryl-tRNA(Sec) selenium transferase	N	N	N	N	ASU_01845	1	GS_05061,GS_21201	2
AgB01	2483176	2504016	AgB01_g168	-	Forkhead box protein F1	N	N	N	N	ASU_01844	1	GS_14827,GS_16616,GS_21201	3
AgB01	2541264	2544098	AgB01_g169	-	hypothetical protein	N	N	N	N	ASU_01842	1	GS_02121	1
AgB01	2578091	2586932	AgB01_g170	-	lipase family protein	N	N	N	N	ASU_01840	1	GS_09170,GS_09556	2
AgB01	2578091	2590279	AgB01_g171	+	lipase family protein	N	N	N	N	ASU_01840	1	GS_09170	1
AgB01	2589142	2596074	AgB01_g172	-	lipase family protein	N	N	N	N	ASU_01839	1	GS_04440	1
AgB01	2600626	2608853	AgB01_g173	+	60S ribosomal protein L24	N	N	N	N	ASU_01838	1	GS_15291	1
AgB01	2628896	2638798	AgB01_g174	+	DNA-directed RNA polymerase II subunit RPB1	N	N	N	N	ASU_01837	1	GS_04478	1
AgB01	2655284	2662589	AgB01_g175	-	Heterogeneous nuclear ribonucleoprotein A1, partial	N	N	N	N	ASU_01836	1	GS_00510	1
AgB01	2666855	2673287	AgB01_g176	-	Heterogeneous nuclear ribonucleoprotein A1	Y	N	N	N			GS_17656	1
AgB01	2670492	2670874	AgB01_g177	.	Heterogeneous nuclear ribonucleoprotein A1, partial	Y	Y	Y	N
AgB01	2673496	2691812	AgB01_g178	-	wu:fc32f04 protein	N	N	N	N	ASU_01835	1	GS_17483	1
AgB01	2706405	2706931	AgB01_g179	.	hypothetical protein	Y	Y	Y	N
AgB01	2707494	2707885	AgB01_g180	.	hypothetical protein	Y	Y	Y	N
AgB01	2707969	2708529	AgB01_g181	.	hypothetical protein	Y	Y	Y	N
AgB01	2726683	2732738	AgB01_g182	-	hypothetical protein	N	N	N	N	ASU_01834	1	GS_18282,GS_22799	2
AgB01	2768100	2781058	AgB01_g183	-	Serine/threonine-protein kinase	N	Y	N	N	ASU_01833	1
AgB01	2770684	2771004	AgB01_g184	+	hypothetical protein	Y	Y	Y	N
AgB01	2784187	2805199	AgB01_g185	-	hypothetical protein	N	N	N	N	ASU_01832	1	GS_06090,GS_06714,GS_09318	3
AgB01	2787125	2789271	AgB01_g186	+	hypothetical protein	Y	N	N	N			GS_09318	1
AgB01	2806221	2806536	AgB01_g187	.	hypothetical protein	Y	Y	Y	N
AgB01	2811154	2815959	AgB01_g188	+	hypothetical protein	N	N	N	N	ASU_01831	1	GS_02460,GS_18104	2
AgB01	2816396	2826161	AgB01_g189	-	gamma-2-syntrophin	N	N	N	N	ASU_01830	1	GS_18535	1
AgB01	2835815	2849579	AgB01_g190	+	Clc-like protein 2	N	N	N	N	ASU_01829	1	GS_11662	1
AgB01	2852079	2855986	AgB01_g191	-	hypothetical protein	N	N	N	N	ASU_01828	1	GS_07688	1
AgB01	2857178	2865768	AgB01_g192	+	hypothetical protein	N	Y	N	N	ASU_01826,ASU_01827	2
AgB01	2858708	2864082	AgB01_g193	-	hypothetical protein	N	N	N	N	ASU_01827	1	GS_14774	1
AgB01	2866868	2889102	AgB01_g194	+	clc-like protein 2	N	N	N	N	ASU_01824,ASU_01825	2	GS_14442,GS_21401	2
AgB01	2885069	2893698	AgB01_g195	+	Clc-like protein 5	N	N	N	N	ASU_01824	1	GS_21401	1
AgB01	2890705	2921694	AgB01_g196	-	Clc-like protein 5	N	N	N	N	ASU_01823	1	GS_01511,GS_11190,GS_18177	3
AgB01	2950238	2975986	AgB01_g197	+	Serine protease, partial	Y	N	N	N			GS_04641,GS_16223,GS_23795	3
AgB01	2973755	2979403	AgB01_g198	-	surf1-like protein	Y	Y	Y	N
AgB01	2991438	3021425	AgB01_g199	+	THO complex subunit 7	N	N	N	N	ASU_03653,ASU_03654	2	GS_05950,GS_09192,GS_17331	3
AgB01	3013548	3045663	AgB01_g200	-	Protein tyrosine phosphatase type IVA 3	Y	N	N	N			GS_17451	1
AgB01	3090059	3110142	AgB01_g201	+	Nuclear hormone receptor family member nhr-1	N	N	N	N	ASU_03657,ASU_03658	2	GS_12168	1
AgB01	3103445	3105169	AgB01_g202	-	hypothetical protein	Y	Y	Y	N
AgB01	3120331	3127036	AgB01_g203	+	Dehydrogenase/reductase SDR family member 7B	N	N	N	N	ASU_03660	1	GS_16675	1
AgB01	3140711	3166944	AgB01_g204	-	Niemann-Pick C1 protein	N	N	N	N	ASU_03660,ASU_03662	2	GS_13070,GS_21182	2
AgB01	3166321	3186934	AgB01_g205	.	hypothetical protein	Y	Y	Y	N
AgB01	3197634	3201721	AgB01_g206	-	nematode cuticle collagen domain-containing protein	N	N	N	N	ASU_03663	1	GS_09568	1
AgB01	3207906	3208378	AgB01_g207	+	kynureninase	N	Y	N	N	ASU_03664	1
AgB01	3209720	3219168	AgB01_g208	+	Kynureninase	N	Y	N	N	ASU_03664	1
AgB01	3217983	3224285	AgB01_g209	-	Kynureninase	N	N	N	N	ASU_03665,ASU_03666	2	GS_03271,Lung_01665	2
AgB01	3226151	3239823	AgB01_g210	-	Cell division protein kinase 9	N	N	N	N	ASU_03667	1	GS_08600,GS_12416	2
AgB01	3240979	3245901	AgB01_g211	-	hypothetical protein	N	Y	N	N	ASU_03668	1
AgB01	3250696	3258098	AgB01_g212	-	Cuticle collagen 12	N	N	N	N	ASU_03669	1	GS_06970,GS_10444	2
AgB01	3279411	3279822	AgB01_g213	.	hypothetical protein	Y	Y	Y	N
AgB01	3285226	3285956	AgB01_g214	+	hypothetical protein	Y	Y	Y	N
AgB01	3332268	3358967	AgB01_g215	+	cbn-moma-1 protein	N	N	N	N	ASU_03670,ASU_03671	2	GS_03138	1
AgB01	3352403	3363788	AgB01_g216	-	cbn-moma-1 protein	N	N	N	N	ASU_03671	1	GS_14222	1
AgB01	3365292	3382342	AgB01_g217	+	Histone acetyltransferase MYST1	N	N	N	N	ASU_03672	1	GS_05000	1
AgB01	3412063	3434229	AgB01_g218	+	disintegrin and metalloproteinase domain-containing protein 24	N	N	N	N	ASU_03673,ASU_03674	2	GS_09757,GS_16553,GS_19763,GS_20040	4
AgB01	3429178	3437048	AgB01_g219	-	Transcription factor Adf-1	N	N	N	N	ASU_03674	1	GS_20949	1
AgB01	3443169	3446937	AgB01_g220	-	hypothetical protein	N	Y	N	N	ASU_03675	1
AgB01	3448246	3456153	AgB01_g221	-	DnaJ subfamily C member 8, partial	N	N	N	N	ASU_03676	1	GS_09715	1
AgB01	3462095	3465269	AgB01_g222	-	hypothetical protein	Y	Y	Y	N
AgB01	3491072	3505149	AgB01_g223	+	g in family member (glb-33)	N	N	N	N	ASU_03677	1	GS_11466,GS_16794	2
AgB01	3508100	3508428	AgB01_g224	.	hypothetical protein	Y	Y	Y	N
AgB01	3511861	3515589	AgB01_g225	+	immunodominant antigen ov33-3	N	N	N	N	ASU_03678	1	GS_03476	1
AgB01	3520237	3540555	AgB01_g226	-	Kinesin-like protein KIF11	N	N	N	N	ASU_03680	1	GS_10595,GS_17499	2
AgB01	3535893	3537167	AgB01_g227	+	Kinesin-like protein KIF11	Y	Y	Y	N
AgB01	3543485	3547631	AgB01_g228	+	Tau-tubulin kinase 1, partial	N	N	N	N	ASU_03681	1	GS_04950	1
AgB01	3544115	3545864	AgB01_g229	-	Tau-tubulin kinase 1, partial	N	N	N	N	ASU_03681	1	GS_04950	1
AgB01	3548561	3553789	AgB01_g230	+	hypothetical protein	N	Y	N	N	ASU_03682	1
AgB01	3553915	3561046	AgB01_g231	+	hypothetical protein	N	N	N	N	ASU_03682	1	GS_20943	1
AgB01	3561481	3563308	AgB01_g232	+	hypothetical protein	Y	Y	Y	N
AgB01	3563576	3594260	AgB01_g233	-	Glutamine-dependent NAD(+) synthetase	N	N	N	N	ASU_12710	1	L3E_02254,L3E_02607,L4_01231,L4_02286,L4_04437,Liv_00860	6
AgB01	3564111	3594281	AgB01_g234	+	Glutamine-dependent NAD(+) synthetase	N	N	N	N	ASU_12710	1	L3E_02254,L3E_02607,L4_01231,L4_02286,Liv_00860	5
AgB01	3594496	3597151	AgB01_g235	.	hypothetical protein	N	N	N	N	ASU_12712	1	L3E_02011	1
AgB01	3609743	3616447	AgB01_g236	.	hypothetical protein	Y	Y	Y	N
AgB01	3611762	3616520	AgB01_g237	-	hypothetical protein	Y	Y	Y	N
AgB01	3616705	3639239	AgB01_g238	+	hypothetical protein	N	N	N	N	ASU_12714,ASU_12715,ASU_12716	3	GS_20495,L3E_00107,Liv_04716,Lung_01166,Lung_01450	5
AgB01	3616726	3646332	AgB01_g239	-	hypothetical protein	N	N	N	N	ASU_12715	1	L3E_00107,Lung_01450	2
AgB01	3645981	3654993	AgB01_g240	+	hypothetical protein	N	N	N	N	ASU_12717	1	GS_02379,GS_02384	2
AgB01	3660104	3665746	AgB01_g241	+	Proto-oncogene serine/threonine-protein kinase pim-1	N	N	N	N	ASU_11032	1	GS_02454	1
AgB01	3667489	3675333	AgB01_g242	-	wu:fc32f04 protein	N	N	N	N	ASU_11033	1	GS_13380,GS_15093,L4_05320	3
AgB01	3680094	3680465	AgB01_g243	+	hypothetical protein	Y	Y	Y	N
AgB01	3680782	3681965	AgB01_g244	+	OV39 antigen	Y	Y	Y	N
AgB01	3731355	3734734	AgB01_g245	-	hypothetical protein	N	N	N	N	ASU_11035,ASU_11036	2	GS_14183,GS_22394	2
AgB01	3701334	3703482	AgB01_g246	+	40S ribosomal protein S21, partial	N	N	N	N	ASU_10172	1	GS_08383	1
AgB01	3713272	3715501	AgB01_g247	-	hypothetical protein	N	Y	N	N	ASU_11034	1
AgB01	3752063	3774641	AgB01_g248	-	nanos-like protein 2	N	N	N	N	ASU_11037	1	GS_19138	1
AgB01	3779501	3781113	AgB01_g249	-	hypothetical protein	N	Y	N	N	ASU_11038	1
AgB01	3779875	3781258	AgB01_g250	.	hypothetical protein	N	Y	N	N	ASU_11038	1
AgB01	3782705	3795903	AgB01_g251	-	Tubulin beta-4 chain, partial	N	N	N	N	ASU_11039	1	GS_11773	1
AgB01	3803075	3814443	AgB01_g252	-	Tubulin beta-4 chain, partial	N	N	N	N	ASU_11040	1	GS_05353	1
AgB01	3824976	3826735	AgB01_g253	-	Rab-like protein 5	Y	Y	Y	N
AgB01	3827676	3848903	AgB01_g254	+	hypothetical protein	N	N	N	N	ASU_04528,ASU_11042,ASU_14689,ASU_15238	4	GS_00939,GS_09413,GS_12329,GS_12423,GS_19790	5
AgB01	3869706	3882874	AgB01_g255	+	hypothetical protein	N	N	N	N	ASU_04529	1	GS_19079	1
AgB01	3910010	3930552	AgB01_g256	+	multidrug resistance protein pgp-1	N	N	N	N	ASU_04530	1	GS_20427	1
AgB01	3955317	3992723	AgB01_g257	-	5'-AMP-activated protein kinase subunit gamma-2	N	N	N	N	ASU_04531	1	GS_08353,GS_17864	2
AgB01	3996718	4011804	AgB01_g258	+	ribonuclease p protein 1-like protein	N	N	N	N	ASU_04532	1	GS_05450	1
AgB01	4005782	4011608	AgB01_g259	-	Reactive oxygen species modulator 1	N	N	N	N	ASU_04533	1	GS_20638	1
AgB01	4013564	4014325	AgB01_g260	.	hypothetical protein	Y	Y	Y	N
AgB01	4016125	4027104	AgB01_g261	-	hypothetical protein	N	N	N	N	ASU_04534	1	L4_00792,Liv_01510	2
AgB01	4035314	4044358	AgB01_g262	-	hypothetical protein	N	N	N	N	ASU_04535	1	GS_06647	1
AgB01	4061212	4067340	AgB01_g263	-	hypothetical protein	N	N	N	N	ASU_04536	1	GS_17749,GS_22942	2
AgB01	4067813	4082565	AgB01_g264	+	hypothetical protein	N	N	N	N	ASU_04537	1	GS_22938	1
AgB01	4085207	4099405	AgB01_g265	-	ras-specific guanine nucleotide-releasing factor 1	N	N	N	N	ASU_04538	1	GS_15155	1
AgB01	4094538	4095135	AgB01_g266	+	ras-specific guanine nucleotide-releasing factor 1	Y	Y	Y	N
AgB01	4115986	4121063	AgB01_g267	+	cathepsin b-like cysteine proteinase 6	N	Y	N	N	ASU_04539	1
AgB01	4120533	4121940	AgB01_g268	-	cathepsin B-like cysteine proteinase	Y	Y	Y	N
AgB01	4123082	4131757	AgB01_g269	-	cathepsin B-like cysteine proteinase	N	N	N	N	ASU_04539,ASU_04540	2	GS_06461	1
AgB01	4128781	4130227	AgB01_g270	.	cathepsin B-like cysteine proteinase	Y	Y	Y	N
AgB01	4133606	4138843	AgB01_g271	-	Glutathione S-transferase	N	N	N	N	ASU_04541	1	GS_06461	1
AgB01	4145050	4151250	AgB01_g272	-	glutathione s-transferase 2	N	N	N	N	ASU_04542	1	GS_14642	1
AgB01	4152914	4160028	AgB01_g273	+	wu:fc32f04 protein	N	N	N	N	ASU_04543	1	GS_11746,GS_17927	2
AgB01	4160766	4175444	AgB01_g274	+	MBT domain-containing protein 1	N	N	N	N	ASU_04544,ASU_04545	2	GS_04288,GS_15549	2
AgB01	4162900	4164369	AgB01_g275	+	MBT domain-containing protein 1	Y	Y	Y	N
AgB01	4172903	4176468	AgB01_g276	-	hypothetical protein	N	N	N	N	ASU_04545	1	GS_04288	1
AgB01	4177626	4186639	AgB01_g277	+	hypothetical protein	N	N	N	N	ASU_04546	1	GS_13554	1
AgB01	4187305	4190579	AgB01_g278	+	hypothetical protein	Y	N	N	N			GS_05328	1
AgB01	4190878	4191736	AgB01_g279	+	hypothetical protein	Y	Y	Y	N
AgB01	4192695	4196867	AgB01_g280	+	hypothetical protein	N	N	N	N	ASU_04547	1	GS_08397	1
AgB01	4197256	4202704	AgB01_g281	-	Acyl-CoA-binding protein 3	N	N	N	N	ASU_04548	1	GS_18148	1
AgB01	4230458	4233869	AgB01_g282	+	hypothetical protein	N	N	N	N	ASU_04549	1	GS_15195	1
AgB01	4243984	4250063	AgB01_g283	-	Leucine aminopeptidase 1	N	N	N	N	ASU_04550	1	GS_00852	1
AgB01	4250876	4255048	AgB01_g284	-	Leucine aminopeptidase 1	Y	Y	Y	N
AgB01	4255800	4275530	AgB01_g285	-	Succinyl-CoA ligase ADP-forming subunit beta, partial	N	N	N	N	ASU_04551,ASU_04552,ASU_04553	3	GS_06295	1
AgB01	4277623	4280150	AgB01_g286	-	cholinesterase	Y	Y	Y	N
AgB01	4280958	4281817	AgB01_g287	.	Long-chain-fatty-acid--CoA ligase 4	Y	Y	Y	N
AgB01	4281877	4285652	AgB01_g288	-	cholinesterase	N	N	N	N	ASU_04554	1	GS_00686	1
AgB01	4287365	4292854	AgB01_g289	-	Cholinesterase	N	Y	N	N	ASU_04554	1
AgB01	4305318	4322808	AgB01_g290	-	liver carboxylesterase 2	N	N	N	N	ASU_04555	1	GS_02456,GS_07003,GS_12284	3
AgB01	4333880	4337257	AgB01_g291	-	hypothetical protein	N	N	N	N	ASU_04556	1	GS_16277	1
AgB01	4337470	4348016	AgB01_g292	-	putative palmitoyltransferase zdhhc24	N	N	N	N	ASU_04557	1	GS_18687	1
AgB01	4349167	4357072	AgB01_g293	-	Pyruvate dehydrogenase phosphatase regulatory subunit	Y	Y	Y	N
AgB01	4359564	4361897	AgB01_g294	-	homocysteine s-methyltransferase 3	Y	Y	Y	N
AgB01	4370074	4380636	AgB01_g295	+	liver carboxylesterase 2	N	N	N	N	ASU_06253	1	GS_04696	1
AgB01	4388748	4399424	AgB01_g296	-	Sulfhydryl oxidase 1	N	N	N	N	ASU_06254	1	GS_14215,L4_01259	2
AgB01	4421728	4438475	AgB01_g297	-	DNA repair protein RAD2	N	N	N	N	ASU_06255	1	GS_04647,GS_16693,GS_22031	3
AgB01	4444782	4490524	AgB01_g298	-	E3 ubiquitin-protein ligase TRIP12	N	N	N	N	ASU_06256,ASU_06257,ASU_06259,ASU_06260	4	GS_04279,GS_09958,GS_13951,GS_24263	4
AgB01	4490050	4493866	AgB01_g299	+	ATP-dependent RNA helicase DDX3X	N	N	N	N	ASU_06261	1	L3E_01663	1
AgB01	4496630	4503930	AgB01_g300	+	ATP-dependent RNA helicase DDX3X	N	N	N	N	ASU_06261	1	GS_09573	1
AgB01	4508455	4514450	AgB01_g301	+	Motile sperm domain-containing protein 1	Y	N	N	N			GS_06081	1
AgB01	4514918	4521642	AgB01_g302	-	trehalase	N	N	N	N	ASU_06262	1	GS_20035	1
AgB01	4525726	4533188	AgB01_g303	+	Trehalase	N	N	N	N	ASU_06263	1	GS_02557,GS_20165	2
AgB01	4535542	4542540	AgB01_g304	+	Dual specificity protein phosphatase 18	N	N	N	N	ASU_06264	1	GS_13078	1
AgB01	4547231	4574074	AgB01_g305	-	neuronal calcium sensor 1	N	N	N	N	ASU_06265	1	GS_12924	1
AgB01	4595943	4622943	AgB01_g306	-	death-inducer obliterator 1	N	N	N	N	ASU_06266	1	GS_03070,GS_09489,GS_16562,GS_20280	4
AgB01	4628747	4630441	AgB01_g307	-	cral-trio domain-containing protein	Y	Y	Y	N
AgB01	4632064	4638017	AgB01_g308	+	cral-trio domain-containing protein	N	N	N	N	ASU_06267	1	GS_05946,GS_11230,L4_00001	3
AgB01	4642922	4646200	AgB01_g309	-	Zinc transporter ZIP14	N	N	N	N	ASU_06268	1	GS_09394,GS_16266	2
AgB01	4671474	4675800	AgB01_g310	+	39s ribosomal protein	N	N	N	N	ASU_06270	1	GS_15655	1
AgB01	4680360	4687669	AgB01_g311	+	Zinc finger protein 706	N	N	N	N	ASU_06271,ASU_06272,ASU_06273	3	GS_09971,GS_20026	2
AgB01	4695296	4698618	AgB01_g312	-	p40	N	Y	N	N	ASU_06274	1
AgB01	4699641	4700276	AgB01_g313	-	hypothetical protein	Y	Y	Y	N
AgB01	4706330	4717167	AgB01_g314	+	putative oxidoreductase	N	N	N	N	ASU_06459	1	GS_15237	1
AgB01	4719411	4725243	AgB01_g315	+	hypothetical protein	N	N	N	N	ASU_06460,ASU_06461	2	L4_00428,Liv_04536	2
AgB01	4725522	4738050	AgB01_g316	-	Fibroleukin	N	N	N	N	ASU_06462	1	GS_18500	1
AgB01	4774103	4785055	AgB01_g317	-	hypothetical protein	N	N	N	N	ASU_06463	1	GS_16414	1
AgB01	4785632	4787799	AgB01_g318	-	Diacylglycerol kinase theta	N	N	N	N	ASU_06464,ASU_06465	2	GS_05598,GS_12444,GS_19183	3
AgB01	4829690	4830129	AgB01_g319	.	hypothetical protein	Y	Y	Y	N
AgB01	4831518	4832186	AgB01_g320	.	hypothetical protein	Y	Y	Y	N
AgB01	4840593	4844022	AgB01_g321	-	RecName: Full=Ovarian abundant message protein; Short=Protein OAM	N	Y	N	N	ASU_02503,ASU_02504,ASU_02505,ASU_09999,ASU_10000	5
AgB01	4844169	4848351	AgB01_g322	+	ovarian abundant message protein	N	N	N	N	ASU_02505,ASU_02507,ASU_10000	3	GS_03278	1
AgB01	4857911	4861671	AgB01_g323	+	hypothetical protein	Y	Y	Y	N
AgB01	4868447	4871107	AgB01_g324	-	hypothetical protein	N	N	N	N	ASU_02508	1	GS_20869	1
AgB01	4892272	4922561	AgB01_g325	-	Plexin domain-containing protein 2	N	N	N	N	ASU_02509	1	GS_00251	1
AgB01	4928521	4939073	AgB01_g326	-	hypothetical protein	N	Y	N	N	ASU_02510	1
AgB01	4933948	4936450	AgB01_g327	-	hypothetical protein	N	Y	N	N	ASU_02510	1
AgB01	4939695	4940652	AgB01_g328	+	hypothetical protein	Y	N	N	N			GS_24049	1
AgB01	4963380	4968307	AgB01_g329	+	Long-chain-fatty-acid--CoA ligase 5	N	N	N	N	ASU_02511,ASU_02512	2	GS_09445,GS_20995,GS_21020	3
AgB01	4966118	4981696	AgB01_g330	-	Long-chain-fatty-acid--CoA ligase 5	N	N	N	N	ASU_02512,ASU_02513,ASU_02514	3	GS_03769,GS_09445,GS_10558,GS_12982	4
AgB01	4971754	4973376	AgB01_g331	.	Long-chain-fatty-acid--CoA ligase 5	Y	Y	Y	N
AgB01	4978827	4980309	AgB01_g332	.	hypothetical protein	Y	Y	Y	N
AgB01	5000327	5007683	AgB01_g333	-	carnitine acylcarnitine carrier protein cacl	N	N	N	N	ASU_02515,ASU_02516	2	GS_02715,GS_20545	2
AgB01	5032119	5045051	AgB01_g334	-	hypothetical protein	N	N	N	N	ASU_02517	1	GS_08121	1
AgB01	5069425	5071773	AgB01_g335	+	hypothetical protein	N	N	N	N	ASU_02518	1	GS_23530	1
AgB01	5076124	5077683	AgB01_g336	+	hypothetical protein	N	N	N	N	ASU_02519	1	L4_03658	1
AgB01	5081894	5086013	AgB01_g337	+	putative methylmalonyl	N	N	N	N	ASU_02521	1	GS_03442,GS_12838	2
AgB01	5086651	5096672	AgB01_g338	-	Protein midA, partial	N	N	N	N	ASU_02522	1	GS_04232,GS_12192	2
AgB01	5100587	5108205	AgB01_g339	-	Calreticulin	N	N	N	N	ASU_02523,ASU_15419	2	GS_19074	1
AgB01	5112769	5121063	AgB01_g340	+	Innexin-16	N	N	N	N	ASU_02524	1	GS_22380	1
AgB01	5121564	5124212	AgB01_g341	+	Innexin-16	Y	Y	Y	N
AgB01	5124289	5128044	AgB01_g342	-	Serpin B10	N	N	N	N	ASU_02525	1	GS_07907	1
AgB01	5131246	5132547	AgB01_g343	-	Serpin-like protein	Y	Y	Y	N
AgB01	5148757	5152257	AgB01_g344	-	hypothetical protein	N	Y	N	N	ASU_02527	1
AgB01	5153226	5163750	AgB01_g345	-	Protein SUP-1	Y	N	N	N			GS_19225	1
AgB01	5183992	5191837	AgB01_g346	+	Chromatin-remodeling complex ATPase chain isw-1	N	Y	N	N	ASU_02530	1
AgB01	5189357	5218921	AgB01_g347	-	Chromatin-remodeling complex ATPase chain isw-1	N	N	N	N	ASU_02531	1	GS_07448	1
AgB01	5219857	5223171	AgB01_g348	+	hypothetical protein	N	N	N	N	ASU_02532	1	GS_02077,GS_11681	2
AgB01	5229176	5250119	AgB01_g349	+	copper-transporting atpase 1	Y	N	N	N			GS_20966	1
AgB01	5252355	5262231	AgB01_g350	+	26S proteasome non-ATPase regulatory subunit 14	N	N	N	N	ASU_02534	1	GS_19012	1
AgB01	5256218	5296182	AgB01_g351	-	Rhotekin	N	N	N	N	ASU_02534,ASU_02535	2	GS_19012,GS_20912	2
AgB01	5314422	5324407	AgB01_g352	+	swib mdm2 domain-containing protein	N	N	N	N	ASU_02536	1	GS_03584	1
AgB01	5329990	5378749	AgB01_g353	+	hypothetical protein	N	N	N	N	ASU_02537	1	GS_15215	1
AgB01	5387543	5405022	AgB01_g354	+	Phosphoglucomutase-2	N	N	N	N	ASU_02538	1	GS_17648	1
AgB01	5409462	5417415	AgB01_g355	+	NTF2-related export protein	N	N	N	N	ASU_02539,ASU_02540	2	GS_02739,GS_05298,GS_22936	3
AgB01	5409016	5418304	AgB01_g356	-	adenosylhomocysteinase	N	N	N	N	ASU_02540	1	GS_22936	1
AgB01	5427511	5436321	AgB01_g357	+	Translation initiation factor eIF-2B subunit alpha	N	N	N	N	ASU_02542	1	GS_22638	1
AgB01	5434802	5436240	AgB01_g358	-	Translation initiation factor eIF-2B subunit alpha	Y	Y	Y	N
AgB01	5436373	5436782	AgB01_g359	.	hypothetical protein	Y	Y	Y	N
AgB01	5437900	5446116	AgB01_g360	-	putative protein phosphatase methylesterase 1	N	N	N	N	ASU_02543	1	GS_17455	1
AgB01	5438147	5441423	AgB01_g361	+	Protein phosphatase methylesterase 1	N	N	N	N	ASU_02543	1	GS_17455	1
AgB01	5447897	5469873	AgB01_g362	-	Histone-lysine N-methyltransferase PRDM9	N	N	N	N	ASU_02544	1	GS_03591	1
AgB01	5457952	5465338	AgB01_g363	+	Histone-lysine N-methyltransferase PRDM9	Y	N	N	N			GS_03591	1
AgB01	5484578	5489540	AgB01_g364	+	organic cation transporter protein	N	N	N	N	ASU_02545,ASU_02546	2	GS_13053	1
AgB01	5498032	5510905	AgB01_g365	+	gamma-aminobutyric acid receptor subunit beta	N	N	N	N	ASU_02547	1	GS_10375,GS_14938	2
AgB01	5548301	5573398	AgB01_g366	+	gamma-aminobutyric acid receptor subunit beta	N	N	N	N	ASU_02548,ASU_09865	2	GS_13929	1
AgB01	5607330	5608686	AgB01_g367	+	glutamate-gated chloride channel	N	N	N	N	ASU_09864	1	L4_01482	1
AgB01	5609095	5632410	AgB01_g368	-	ribosomal rna small subunit methyltransferase nep-1	N	N	N	N	ASU_09863	1	GS_02155,GS_17375,GS_24068	3
AgB01	5627160	5642814	AgB01_g369	+	ribosomal rna small subunit methyltransferase nep-1	N	N	N	N	ASU_09862	1	GS_00369,GS_24068	2
AgB01	5659565	5660426	AgB01_g370	.	hypothetical protein	Y	Y	Y	N
AgB01	5662086	5664193	AgB01_g371	-	hypothetical protein	Y	Y	Y	N
AgB01	5685687	5751698	AgB01_g372	+	Arf-GAP with GTPase, ANK repeat and PH domain-containing protein 3	N	N	N	N	ASU_11904	1	GS_08947	1
AgB01	5709617	5721549	AgB01_g373	-	spectrin beta brain 1	Y	Y	Y	N
AgB01	5757493	5766339	AgB01_g374	-	hypothetical protein	Y	Y	Y	N
AgB01	5769661	5777336	AgB01_g375	+	S-phase kinase-associated protein 1	N	N	N	N	ASU_11905	1	GS_16830	1
AgB01	5778692	5781498	AgB01_g376	-	hypothetical protein	Y	Y	Y	N
AgB01	5781701	5791669	AgB01_g377	+	hypothetical protein	Y	Y	Y	N
AgB01	5796460	5841039	AgB01_g378	-	Neuropeptide receptor 15	N	N	N	N	ASU_14109	1	GS_23901	1
AgB01	5847538	5857240	AgB01_g379	+	hypothetical protein	N	N	N	N	ASU_07626	1	GS_05648	1
AgB01	5859774	5870828	AgB01_g380	+	Bestrophin-1	N	N	N	N	ASU_07627	1	GS_17351	1
AgB01	5873295	5883237	AgB01_g381	+	Uncharacterized protein F10E9.4	N	N	N	N	ASU_07628,ASU_07629	2	GS_06377,GS_13599	2
AgB01	5882990	5892930	AgB01_g382	-	glycosylation related family member (gly-15)	Y	N	N	N			GS_13613	1
AgB01	5901285	5901905	AgB01_g383	+	e3 ubiquitin-protein ligase ubr3	Y	Y	Y	N
AgB01	5940024	5974643	AgB01_g384	+	formin-like protein	N	N	N	N	ASU_08696,ASU_14985	2	GS_02190,GS_02826	2
AgB01	5971575	5977609	AgB01_g385	-	formin-like protein	N	Y	N	N	ASU_08695	1
AgB01	5980538	5994824	AgB01_g386	-	protein phosphatase phlpp-like protein	N	N	N	N	ASU_08694	1	GS_00744,GS_09169,GS_14178	3
AgB01	6004786	6013002	AgB01_g387	-	Low affinity immunoglobulin epsilon Fc receptor	N	N	N	N	ASU_08693	1	Lung_00923	1
AgB01	6017362	6020345	AgB01_g388	-	hypothetical protein	N	N	N	N	ASU_08692	1	GS_07446	1
AgB01	6024641	6031698	AgB01_g389	+	Nucleoporin seh1-A	N	N	N	N	ASU_08690,ASU_08691	2	GS_04749,GS_06524,GS_17119	3
AgB01	6043522	6044637	AgB01_g390	+	hypothetical protein	Y	Y	Y	N
AgB01	6046925	6048021	AgB01_g391	+	hypothetical protein	Y	Y	Y	N
AgB01	6050261	6071766	AgB01_g392	-	Small G protein signaling modulator 1, partial	N	N	N	N	ASU_08688,ASU_08689	2	GS_11007	1
AgB01	6072300	6072552	AgB01_g393	.	Small G protein signaling modulator 1, partial	Y	Y	Y	N
AgB01	6073096	6105213	AgB01_g394	-	Small G protein signaling modulator 1, partial	N	Y	N	N	ASU_08687	1
AgB01	6137802	6159681	AgB01_g395	-	Ankyrin-1	N	N	N	N	ASU_08685	1	GS_09031,GS_15728,GS_17442	3
AgB01	6154738	6155160	AgB01_g396	.	ankyrin-2	Y	Y	Y	N
AgB01	6165809	6170987	AgB01_g397	+	hypothetical protein	N	Y	N	N	ASU_08684	1
AgB01	6173366	6182290	AgB01_g398	-	cre-snf-12 protein	N	N	N	N	ASU_08682,ASU_08683	2	GS_14333	1
AgB01	6190002	6192095	AgB01_g399	-	Transporter	N	N	N	N	ASU_08680,ASU_08681	2	GS_21059	1
AgB01	6195805	6202484	AgB01_g400	-	trna (guanine-n -)-methyltransferase subunit trm82	N	N	N	N	ASU_08679	1	GS_10135	1
AgB01	6207521	6232278	AgB01_g401	+	N-alpha-acetyltransferase 15, NatA auxiliary subunit	N	N	N	N	ASU_08678,ASU_14928	2	GS_01641,GS_13709	2
AgB01	6232849	6243915	AgB01_g402	+	ES2-like protein	N	N	N	N	ASU_12508,ASU_14927	2	GS_07291	1
AgB01	6254358	6282590	AgB01_g403	+	Cell division protein kinase 12	N	N	N	N	ASU_12509	1	GS_01914,GS_15789	2
AgB01	6281175	6290056	AgB01_g404	-	hypothetical protein	N	N	N	N	ASU_12510	1	GS_03331	1
AgB01	6294211	6297993	AgB01_g405	+	Probable mitochondrial pyruvate carrier 1	N	N	N	N	ASU_12511	1	GS_10187	1
AgB01	6305326	6331932	AgB01_g406	+	Coronin-like protein cor-1	N	N	N	N	ASU_12512	1	GS_01083,GS_13034	2
AgB01	6334307	6343234	AgB01_g407	-	H/ACA ribonucleoprotein complex subunit 4	N	N	N	N	ASU_12259,ASU_12513	2	GS_10509	1
AgB01	6346891	6375380	AgB01_g408	-	gtp-binding nuclear protein ran	N	N	N	N	ASU_12258	1	GS_01459	1
AgB01	6346962	6355224	AgB01_g409	+	GTP-binding nuclear protein Ran	N	N	N	N	ASU_12258	1	GS_01459	1
AgB01	6354036	6387821	AgB01_g410	-	protein tumorous imaginal	N	N	N	N	ASU_12257	1	GS_05740,GS_08549,GS_24394	3
AgB01	6363226	6366254	AgB01_g411	+	Protein tumorous imaginal disc	N	N	N	N	ASU_12257	1	GS_24394	1
AgB01	6388552	6397685	AgB01_g412	-	f-box domain containing protein	N	N	N	N	ASU_12256	1	GS_24372	1
AgB01	6398691	6401615	AgB01_g413	+	sperm-specific protein	N	N	N	N	ASU_12255	1	GS_07193,GS_14237	2
AgB01	6403533	6432041	AgB01_g414	+	Developmentally-regulated GTP-binding protein 1, partial	N	N	N	N	ASU_12253,ASU_12254	2	GS_02166,GS_22605	2
AgB01	6435318	6444133	AgB01_g415	-	PX domain-containing protein kinase-like protein	N	N	N	N	ASU_07431	1	GS_17118	1
AgB01	6445599	6452166	AgB01_g416	-	Golgin-45	N	N	N	N	ASU_07432	1	GS_16985	1
AgB01	6468254	6488113	AgB01_g417	-	hypothetical protein	N	N	N	N	ASU_07433	1	GS_14661	1
AgB01	6488602	6502854	AgB01_g418	+	Protein disulfide-isomerase 2	N	N	N	N	ASU_07434,ASU_07435	2	GS_00653,GS_14919,GS_21224	3
AgB01	6502924	6514894	AgB01_g419	-	Kelch-like protein 18	N	N	N	N	ASU_07436	1	GS_18704	1
AgB01	6504031	6508453	AgB01_g420	+	Kelch-like protein 18	N	Y	N	N	ASU_07436	1
AgB01	6516768	6521657	AgB01_g421	+	hypothetical protein	N	N	N	N	ASU_07437	1	GS_07450	1
AgB01	6524136	6528380	AgB01_g422	+	40S ribosomal protein S12	N	N	N	N	ASU_07438	1	GS_20320	1
AgB01	6531218	6543666	AgB01_g423	+	Adenosine 3'-phospho 5'-phosphosulfate transporter 2	N	N	N	N	ASU_07439,ASU_11634	2	GS_10035	1
AgB01	6539794	6549132	AgB01_g424	-	Calcipressin-like protein	N	N	N	N	ASU_11635	1	GS_09288,GS_10205	2
AgB01	6544584	6548218	AgB01_g425	+	Calcipressin-like protein	N	N	N	N	ASU_11635	1	GS_09288,GS_10205	2
AgB01	6564532	6583806	AgB01_g426	+	serine threonine-protein kinase	N	N	N	N	ASU_11636	1	GS_05699	1
AgB01	6583870	6587618	AgB01_g427	+	Ubiquitin-40S ribosomal protein S27a	Y	N	N	N			GS_23080	1
AgB01	6588985	6589314	AgB01_g428	-	hypothetical protein	N	N	N	N	ASU_11638	1	Liv_02052	1
AgB01	6597676	6607312	AgB01_g429	-	putative tyrosine-protein kinase kin-31	N	N	N	N	ASU_11639	1	GS_13616	1
AgB01	6617447	6619218	AgB01_g430	+	zinc c2h2 type family protein	Y	Y	Y	N
AgB01	6621325	6622943	AgB01_g431	+	zinc c2h2 type family protein	Y	Y	Y	N
AgB01	6623853	6625004	AgB01_g432	.	hypothetical protein	Y	Y	Y	N
AgB01	6645295	6645623	AgB01_g433	.	hypothetical protein	Y	Y	Y	N
AgB01	6646342	6648473	AgB01_g434	.	hypothetical protein	Y	Y	Y	N
AgB01	6652769	6654848	AgB01_g435	.	iron-sulfur cluster assembly 1	Y	Y	Y	N
AgB01	6652769	6659892	AgB01_g436	-	Iron-sulfur cluster assembly 1	Y	Y	Y	N
AgB01	6661977	6664537	AgB01_g437	-	Iron-sulfur cluster assembly 1	Y	Y	Y	N
AgB01	6675987	6679130	AgB01_g438	-	cysteine proteinase	N	N	N	N	ASU_13231	1	A02773	1
AgB01	6680371	6680739	AgB01_g439	.	hypothetical protein	Y	Y	Y	N
AgB01	6681643	6682135	AgB01_g440	.	hypothetical protein	Y	Y	Y	N
AgB01	6694086	6705033	AgB01_g441	+	hypothetical protein	N	N	N	N	ASU_14016	1	GS_06974	1
AgB01	6708396	6712157	AgB01_g442	+	cuticlin-1	N	N	N	N	ASU_14017	1	GS_16336	1
AgB01	6715956	6720646	AgB01_g443	-	Cuticlin-1	N	N	N	N	ASU_14018	1	GS_24220	1
AgB01	6720539	6742956	AgB01_g444	+	hypothetical protein	N	N	N	N	ASU_14019	1	GS_01480	1
AgB01	6749726	6754799	AgB01_g445	-	hypothetical protein	Y	N	N	N			GS_17366	1
AgB01	6750090	6755777	AgB01_g446	+	hypothetical protein	Y	N	N	N			GS_10537,GS_17366,Lung_00171	3
AgB01	6756231	6758787	AgB01_g447	-	hypothetical protein	Y	N	N	N			GS_10537,Lung_00171	2
AgB01	6763269	6763703	AgB01_g448	.	hypothetical protein	Y	Y	Y	N
AgB01	6768739	6784468	AgB01_g449	+	Casein kinase I isoform delta-A	N	N	N	N	ASU_03588	1	GS_00958	1
AgB01	6788908	6796020	AgB01_g450	+	photosystem i biogenesis protein	N	N	N	N	ASU_03587	1	GS_18604,GS_22710	2
AgB01	6793563	6800477	AgB01_g451	-	photosystem i biogenesis protein	N	N	N	N	ASU_03586	1	GS_22710	1
AgB01	6806199	6816287	AgB01_g452	-	MSP-domain protein 4	N	N	N	N	ASU_03584,ASU_03585	2	GS_06449,GS_21829	2
AgB01	6839229	6848454	AgB01_g453	+	tribbles-like protein 2	N	N	N	N	ASU_03582	1	GS_22007	1
AgB01	6837722	6838119	AgB01_g454	+	hypothetical protein	Y	Y	Y	N
AgB01	6851442	6860497	AgB01_g455	-	Endoplasmic reticulum-Golgi intermediate compartment protein 3	N	N	N	N	ASU_03580,ASU_03581	2	GS_19573,GS_19927	2
AgB01	6850175	6852988	AgB01_g456	+	Endoplasmic reticulum-Golgi intermediate compartment protein 3	N	N	N	N	ASU_03580,ASU_03581	2	GS_19573,GS_19927	2
AgB01	6853042	6858193	AgB01_g457	+	Endoplasmic reticulum-Golgi intermediate compartment protein 3	N	N	N	N	ASU_03581	1	GS_19573	1
AgB01	6861349	6864500	AgB01_g458	-	Carrier 2	Y	Y	Y	N
AgB01	6872356	6903706	AgB01_g459	-	hypothetical protein	N	N	N	N	ASU_03579	1	GS_02920,GS_15591,GS_20686	3
AgB01	6908229	6918905	AgB01_g460	+	Heterogeneous nuclear ribonucleoprotein Q	N	N	N	N	ASU_03578	1	GS_08156	1
AgB01	6908234	6917132	AgB01_g461	-	Heterogeneous nuclear ribonucleoprotein Q, partial	N	N	N	N	ASU_03578	1	GS_01740,GS_08156	2
AgB01	6920769	6927723	AgB01_g462	+	hypothetical protein	N	N	N	N	ASU_03577	1	GS_24099	1
AgB01	6928742	6940155	AgB01_g463	-	Tau-tubulin kinase 2	N	N	N	N	ASU_03576	1	GS_07126	1
AgB01	6941524	6946523	AgB01_g464	+	SEC14-like protein 4	N	N	N	N	ASU_03575	1	GS_12142,GS_17504	2
AgB01	6954883	6978162	AgB01_g465	-	adp-ribosylation crystallin j1	N	N	N	N	ASU_03574	1	GS_05131	1
AgB01	7009124	7029831	AgB01_g466	+	hypothetical protein	N	N	N	N	ASU_03573	1	GS_22481	1
AgB01	7044632	7055932	AgB01_g467	+	Esterase	N	N	N	N	ASU_03572	1	GS_14449	1
AgB01	7063948	7080562	AgB01_g468	+	E3 ubiquitin-protein ligase TRIM13	N	N	N	N	ASU_03571	1	GS_00348	1
AgB01	7097986	7101081	AgB01_g469	.	Homeobox protein ceh-30	N	N	N	N	ASU_03570	1	GS_17336	1
AgB01	7097986	7108699	AgB01_g470	-	Homeobox protein ceh-30	N	N	N	N	ASU_03570	1	GS_17336	1
AgB01	7120489	7125204	AgB01_g471	+	hypothetical protein	N	Y	N	N	ASU_03569	1
AgB01	7122358	7149457	AgB01_g472	-	hemicentin-1	N	N	N	N	ASU_03567,ASU_03568	2	GS_02320,GS_09042,GS_19547	3
AgB01	7156288	7158496	AgB01_g473	+	hypothetical protein	N	N	N	N	ASU_03566	1	GS_18290	1
AgB01	7166679	7168990	AgB01_g474	+	homeobox protein ceh-31	N	N	N	N	ASU_03565	1	GS_23806	1
AgB01	7174944	7178868	AgB01_g475	+	trifunctional enzyme subunit	N	N	N	N	ASU_03564	1	GS_12037	1
AgB01	7181435	7195756	AgB01_g476	-	Trifunctional enzyme subunit alpha	N	N	N	N	ASU_03563	1	GS_00647,GS_12787,L3E_02194	3
AgB01	7202720	7227486	AgB01_g477	-	zinc finger ccch domain-containing protein 3	N	N	N	N	ASU_03561,ASU_03562	2	GS_21581,GS_22214	2
AgB01	7227223	7248727	AgB01_g478	+	26S proteasome non-ATPase regulatory subunit 9	N	N	N	N	ASU_03559,ASU_03560	2	GS_04181,GS_07609	2
AgB01	7232507	7246633	AgB01_g479	-	Heterogeneous nuclear ribonucleoprotein L, partial	N	N	N	N	ASU_03559	1	GS_04181	1
AgB01	7284887	7287736	AgB01_g480	+	hypothetical protein	N	N	N	N	ASU_03557,ASU_03558	2	GS_03149,GS_14865	2
AgB01	7284887	7324304	AgB01_g481	-	hypothetical protein	N	N	N	N	ASU_03558	1	GS_22337	1
AgB01	7349339	7430644	AgB01_g482	+	Serine/threonine-protein phosphatase 2A regulatory subunit B'' subunit beta	N	N	N	N	ASU_06701	1	GS_03420	1
AgB01	7340112	7340511	AgB01_g483	.	hypothetical protein	Y	Y	Y	N
AgB01	7434071	7476600	AgB01_g484	+	E3 ubiquitin-protein ligase RNF19B	N	N	N	N	ASU_06702,ASU_07848	2	GS_04458	1
AgB01	7443659	7446370	AgB01_g485	+	spindle- and centromere-associated protein	Y	Y	Y	N
AgB01	7478818	7502305	AgB01_g486	+	dtw domain-containing protein 1	N	N	N	N	ASU_07846,ASU_07847	2	GS_03071,GS_17257,Liv_02738,Liv_04776	4
AgB01	7483376	7493873	AgB01_g487	-	b-cell receptor-associated protein 31	N	N	N	N	ASU_07846,ASU_07847	2	Liv_02070,Liv_02738,Liv_04776	3
AgB01	7514040	7549543	AgB01_g488	-	Twinkle protein, partial	N	N	N	N	ASU_00259,ASU_07845	2	GS_02771	1
AgB01	7551237	7564528	AgB01_g489	-	galactokinase	N	N	N	N	ASU_00260	1	GS_05480,GS_23037,L4_04321	3
AgB01	7612868	7634101	AgB01_g490	-	TBC1 domain family member 2B, partial	N	N	N	N	ASU_00261	1	GS_04011	1
AgB01	7587454	7609815	AgB01_g491	+	Protein scabrous	N	N	N	N	ASU_00262	1	GS_03472	1
AgB01	7693687	7728751	AgB01_g492	+	Epithelial discoidin domain-containing receptor 1	N	N	N	N	ASU_00265	1	GS_08910	1
AgB01	7725027	7725380	AgB01_g493	.	hypothetical protein	Y	Y	Y	N
AgB01	7730020	7741069	AgB01_g494	-	beta- -galactosyltransferase bre-5	N	N	N	N	ASU_00266,ASU_00267	2	GS_14577,GS_22535	2
AgB01	7730020	7735828	AgB01_g495	+	Beta-1,3-galactosyltransferase bre-5	N	N	N	N	ASU_00266	1	GS_22535	1
AgB01	7742673	7766263	AgB01_g496	-	influenza virus ns1a-binding protein	N	N	N	N	ASU_00268	1	GS_00485,L3E_00825	2
AgB01	7782021	7788685	AgB01_g497	+	hypothetical protein	N	Y	N	N	ASU_00270	1
AgB01	7798896	7807998	AgB01_g498	-	hypothetical protein	N	N	N	N	ASU_00271	1	GS_15917,GS_22735	2
AgB01	7820051	7824643	AgB01_g499	-	hypothetical protein	N	N	N	N	ASU_00272,ASU_00273	2	GS_06040	1
AgB01	7841923	7843900	AgB01_g500	+	hypothetical protein	Y	N	N	N			GS_03298	1
AgB01	7847908	7852850	AgB01_g501	+	hypothetical protein	N	N	N	N	ASU_00274	1	GS_05006,GS_16870	2
AgB01	7850154	7851486	AgB01_g502	-	hypothetical protein	Y	N	N	N			GS_16870	1
AgB01	7854835	7865768	AgB01_g503	+	Integral membrane protein 2B	N	N	N	N	ASU_00275	1	GS_05572,GS_14207	2
AgB01	7865879	7871952	AgB01_g504	-	hypothetical protein	N	Y	N	N	ASU_00276	1
AgB01	7872019	7872404	AgB01_g505	.	hypothetical protein	Y	Y	Y	N
AgB01	7872642	7873878	AgB01_g506	-	hypothetical protein	Y	Y	Y	N
AgB01	7883651	7886267	AgB01_g507	-	Arylacetamide deacetylase	N	N	N	N	ASU_00277	1	GS_19588	1
AgB01	7891009	7898626	AgB01_g508	+	Uncharacterized protein C09G5.8	N	N	N	N	ASU_00278	1	GS_17520,GS_18847	2
AgB01	7915464	7926248	AgB01_g509	+	Zinc finger protein Gfi-1	N	N	N	N	ASU_00279	1	GS_04245	1
AgB01	7935005	7938424	AgB01_g510	-	mpv17-like protein	N	N	N	N	ASU_00280	1	GS_14614	1
AgB01	7950944	7970170	AgB01_g511	-	hypothetical protein	N	N	N	N	ASU_00281	1	GS_03964,GS_07687,GS_09769	3
AgB01	7990394	7996174	AgB01_g512	+	Arylacetamide deacetylase	N	N	N	N	ASU_00282	1	GS_21941	1
AgB01	7974817	7987157	AgB01_g513	-	Arylacetamide deacetylase, partial	Y	N	N	N			Liv_01900	1
AgB01	8002392	8020599	AgB01_g514	+	hypothetical protein	N	N	N	N	ASU_00283	1	GS_00929	1
AgB01	8017557	8052238	AgB01_g515	-	Multidrug resistance-associated protein 1, partial	N	N	N	N	ASU_00285	1	GS_06310,GS_14898,GS_24095	3
AgB01	8023265	8024403	AgB01_g516	+	28 kDa inner dynein arm light chain, axonemal	N	N	N	N	ASU_00284	1	GS_01088	1
AgB01	8074540	8109279	AgB01_g517	-	Protein crumb	N	N	N	N	ASU_00286	1	GS_20945	1
AgB01	8102063	8102679	AgB01_g518	.	Protein crumb	Y	Y	Y	N
AgB01	8118687	8119321	AgB01_g519	.	hypothetical protein	Y	Y	Y	N
AgB01	8120266	8136179	AgB01_g520	-	hypothetical protein	Y	N	N	N			GS_08062	1
AgB01	8123952	8133406	AgB01_g521	+	hypothetical protein	N	N	N	N	ASU_00287	1	GS_02644	1
AgB01	8140384	8146135	AgB01_g522	-	hypothetical protein	N	N	N	N	ASU_00289	1	GS_02769	1
AgB01	8147416	8154762	AgB01_g523	-	Uncharacterized protein K12H4.5	N	N	N	N	ASU_00290	1	GS_02769	1
AgB01	8163361	8176823	AgB01_g524	+	Oxysterol-binding protein-related protein 1	N	N	N	N	ASU_00291	1	GS_23380	1
AgB01	8179214	8181849	AgB01_g525	+	Protein CutA	N	N	N	N	ASU_00292	1	GS_13626,GS_16449	2
AgB01	8181138	8199816	AgB01_g526	-	Signal transducing adapter molecule 1	N	N	N	N	ASU_00293	1	GS_13626	1
AgB01	8204158	8209623	AgB01_g527	+	hypothetical protein	N	N	N	N	ASU_00294	1	GS_10199,L4_00203	2
AgB01	8210966	8211629	AgB01_g528	.	hypothetical protein	Y	Y	Y	N
AgB01	8211688	8212160	AgB01_g529	.	hypothetical protein	Y	Y	Y	N
AgB01	8225087	8244655	AgB01_g530	+	G-protein coupled receptor 52	N	N	N	N	ASU_00295	1	GS_08921	1
AgB01	8253715	8263440	AgB01_g531	-	hypothetical protein	N	N	N	N	ASU_00296	1	GS_05552	1
AgB01	8264085	8265596	AgB01_g532	.	hypothetical protein	Y	Y	Y	N
AgB01	8281882	8294265	AgB01_g533	-	f-box wd repeat-containing protein 11	N	N	N	N	ASU_00297,ASU_00298	2	GS_20920,L3E_02729	2
AgB01	8285894	8288092	AgB01_g534	+	LINE-1 reverse transcriptase	Y	Y	Y	N
AgB01	8294577	8306698	AgB01_g535	+	60S ribosomal protein L11, partial	N	N	N	N	ASU_00299,ASU_00300	2	GS_08362,GS_11043	2
AgB01	8317026	8328367	AgB01_g536	+	ADAM 17 protease	N	N	N	N	ASU_00301	1	GS_17650	1
AgB01	8331146	8351609	AgB01_g537	-	glutaminase	N	N	N	N	ASU_00302,ASU_00303	2	GS_05441	1
AgB01	8362505	8376164	AgB01_g538	+	5 -amp-activated protein kinase subunit beta-2	N	N	N	N	ASU_00304,ASU_00305	2	GS_10396,GS_13835	2
AgB01	8374743	8376021	AgB01_g539	-	5'-AMP-activated protein kinase subunit beta-2	Y	Y	Y	N
AgB01	8386549	8403908	AgB01_g540	-	proton myo-inositol cotransporter	N	N	N	N	ASU_00306	1	GS_13744,GS_18726,GS_18979	3
AgB01	8404985	8413557	AgB01_g541	+	hypothetical protein	N	N	N	N	ASU_00307	1	GS_10347	1
AgB01	8413281	8423576	AgB01_g542	-	Solute carrier family 22 member 3	N	N	N	N	ASU_00308,ASU_00309	2	GS_13063,L4_03794	2
AgB01	8416755	8418140	AgB01_g543	+	Solute carrier family 22 member 3	N	N	N	N	ASU_00308,ASU_00309	2	GS_13063	1
AgB01	8443029	8467307	AgB01_g544	-	T. brucei spp.-specific protein	N	Y	N	N	ASU_00310	1
AgB01	8465735	8466407	AgB01_g545	.	hypothetical protein	Y	Y	Y	N
AgB01	8485319	8494571	AgB01_g546	+	neuropeptide ff receptor 2	N	N	N	N	ASU_00311	1	GS_23405	1
AgB01	8498935	8511559	AgB01_g547	-	somatostatin receptor type 5	N	N	N	N	ASU_00312	1	GS_20422	1
AgB01	8533259	8535838	AgB01_g548	.	Craniofacial development protein 2, partial	Y	Y	Y	N
AgB01	8546994	8553935	AgB01_g549	-	aminopeptidase n	Y	Y	Y	N
AgB01	8567343	8568182	AgB01_g550	-	hypothetical protein	N	N	N	N	ASU_12158	1	GS_01017	1
AgB01	8575824	8580024	AgB01_g551	+	hypothetical protein	N	N	N	N	ASU_12159	1	GS_09287,L4_04875	2
AgB01	8586448	8586796	AgB01_g552	.	Uncharacterized protein U88	Y	Y	Y	N
AgB01	8589608	8605600	AgB01_g553	+	intermediate filament protein ifa-1	N	N	N	N	ASU_12160	1	GS_04222,GS_09774,GS_13738	3
AgB01	8636068	8661577	AgB01_g554	+	hypothetical protein	N	N	N	N	ASU_12161	1	GS_02876,GS_20737	2
AgB01	8661721	8665940	AgB01_g555	-	pantothenate kinase 4	N	Y	N	N	ASU_15232	1
AgB01	8667949	8671207	AgB01_g556	+	Terminal uridylyltransferase 4	N	N	N	N	ASU_12980	1	GS_06129,GS_17742	2
AgB01	8685591	8692924	AgB01_g557	-	hypothetical protein	N	N	N	N	ASU_12979	1	GS_12458	1
AgB01	8694226	8698667	AgB01_g558	-	Cuticle collagen 10	N	N	N	N	ASU_12978	1	GS_01211	1
AgB01	8700604	8714704	AgB01_g559	+	hypothetical protein	N	N	N	N	ASU_12977	1	GS_18589,GS_18936	2
AgB01	8743152	8756568	AgB01_g560	+	RecName: Full=Collagen alpha-2(IV) chain; Flags: Precursor	N	N	N	N	ASU_10680,ASU_12976,ASU_15350	3	GS_04364,GS_09278,GS_21893	3
AgB01	8738397	8745681	AgB01_g561	-	RecName: Full=Collagen alpha-2(IV) chain; Flags: Precursor	N	N	N	N	ASU_10680,ASU_12976,ASU_15350	3	GS_04364,GS_09278	2
AgB01	8756406	8768199	AgB01_g562	-	myosin-8	N	N	N	N	ASU_05267	1	GS_09059,GS_21893	2
AgB01	8772940	8778166	AgB01_g563	-	myosin-8	Y	Y	Y	N
AgB01	8780300	8792363	AgB01_g564	+	uridine diphosphate glucose pyrophosphatase	Y	N	N	N			GS_18940,L4_00359	2
AgB01	8795446	8798797	AgB01_g565	-	hypothetical protein	N	N	N	N	ASU_15358	1	GS_18300,GS_18940,L4_00359	3
AgB01	8813420	8830390	AgB01_g566	+	Zinc finger protein 79	N	N	N	N	ASU_05270	1	GS_04084	1
AgB01	8832010	8842421	AgB01_g567	+	hypothetical protein	N	N	N	N	ASU_05271,ASU_05272	2	GS_00068,GS_18931	2
AgB01	8870009	8888329	AgB01_g568	+	cathepsin b-like cysteine proteinase 6	N	N	N	N	ASU_05273	1	Liv_01485,Liv_02735	2
AgB01	8887514	8894658	AgB01_g569	-	Na(+)/H(+) antiporter nhx-3	N	N	N	N	ASU_05274	1	GS_07282,GS_09502	2
AgB01	8900749	8906617	AgB01_g570	-	hypothetical protein	N	N	N	N	ASU_05275	1	GS_20924	1
AgB01	8926157	8940232	AgB01_g571	-	Alpha-1,3-mannosyl-glycoprotein 4-beta-N-acetylglucosaminyltransferase A, partial	N	N	N	N	ASU_05276,ASU_05277,ASU_05278	3	GS_00538,GS_19504	2
AgB01	8921952	8922396	AgB01_g572	.	putative g-protein coupled receptor tkr-1	Y	Y	Y	N
AgB01	8976226	8998210	AgB01_g573	+	tRNA guanosine-2'-O-methyltransferase TRM11	N	N	N	N	ASU_05279	1	GS_14674,GS_20254	2
AgB01	8999015	9021751	AgB01_g574	-	Esterase	N	N	N	N	ASU_05280,ASU_05281,ASU_05282	3	GS_00505,GS_09263,GS_20254	3
AgB01	9039369	9049503	AgB01_g575	+	Aromatic-amino-acid aminotransferase 1	Y	N	N	N			GS_00622	1
AgB01	9059094	9064010	AgB01_g576	-	Uncharacterized protein YER152C	Y	Y	Y	N
AgB01	9068536	9070615	AgB01_g577	+	Innexin unc-9	N	N	N	N	ASU_07654	1	GS_17578	1
AgB01	9076368	9085623	AgB01_g578	-	Maleylacetoacetate isomerase 2	N	N	N	N	ASU_07653	1	GS_10118	1
AgB01	9083061	9085965	AgB01_g579	.	putative maleylacetoacetate isomerase 2	N	Y	N	N	ASU_07653	1
AgB01	9088800	9095502	AgB01_g580	+	hypothetical protein	N	Y	N	N	ASU_07652	1
AgB01	9096609	9102652	AgB01_g581	+	Tubulin alpha-2 chain	N	N	N	N	ASU_07651	1	GS_22962	1
AgB01	9104551	9117448	AgB01_g582	+	protein zwilch-like protein	N	N	N	N	ASU_07650	1	GS_15536	1
AgB01	9118741	9124096	AgB01_g583	+	hypothetical protein	N	N	N	N	ASU_07649	1	GS_23785	1
AgB01	9124285	9130926	AgB01_g584	+	HD domain-containing protein 2	Y	N	N	N			GS_20291	1
AgB01	9133481	9137115	AgB01_g585	-	60S ribosomal protein L10	Y	Y	Y	N
AgB01	9132614	9137166	AgB01_g586	+	60S ribosomal protein L10	Y	Y	Y	N
AgB01	9147480	9154687	AgB01_g587	+	Sucrase-isomaltase	Y	Y	Y	N
AgB01	9174149	9178130	AgB01_g588	-	Structural maintenance of chromosomes protein 1A	Y	N	N	N			GS_23991	1
AgB01	9186402	9190415	AgB01_g589	+	hypothetical protein	N	N	N	N	ASU_07642	1	GS_24117	1
AgB01	9190521	9203628	AgB01_g590	-	Nitrogen permease regulator 2-like protein, partial	N	N	N	N	ASU_07641	1	GS_08208	1
AgB01	9213462	9240821	AgB01_g591	-	DNA-directed RNA polymerase III subunit RPC1	N	N	N	N	ASU_07640	1	GS_15222	1
AgB01	9245705	9250665	AgB01_g592	+	Transthyretin-like protein 5	N	N	N	N	ASU_07636,ASU_07639	2	GS_04153,GS_09990	2
AgB01	9254004	9257796	AgB01_g593	+	Cuticlin-1	N	N	N	N	ASU_07638	1	GS_01725,GS_20935	2
AgB01	9258986	9261177	AgB01_g594	+	transthyretin-like protein 5	N	N	N	N	ASU_07637	1	GS_12578	1
AgB01	9276936	9279945	AgB01_g595	-	Stress-associated endoplasmic reticulum protein 2	N	N	N	N	ASU_07635	1	GS_07482	1
AgB01	9288356	9292768	AgB01_g596	+	hypothetical protein	N	N	N	N	ASU_07633	1	GS_12937	1
AgB01	9295739	9305537	AgB01_g597	-	Cysteine synthase	N	N	N	N	ASU_07632	1	GS_23109	1
AgB01	9326740	9333254	AgB01_g598	+	Zinc metalloproteinase nas-37, partial	N	N	N	N	ASU_07631	1	GS_05265	1
AgB01	9340380	9347420	AgB01_g599	+	Zinc metalloproteinase nas-37	N	Y	N	N	ASU_07630	1
AgB01	9375780	9424811	AgB01_g600	-	small conductance calcium-activated potassium channel protein	N	N	N	N	ASU_01520	1	GS_01481,GS_06522,GS_15264,GS_18780	4
AgB01	9501458	9513042	AgB01_g601	+	soluble calcium-activated nucleotidase 1	N	N	N	N	ASU_01519	1	GS_21093	1
AgB01	9513376	9523823	AgB01_g602	+	ctr copper transporter	N	N	N	N	ASU_01518	1	GS_17624	1
AgB01	9521269	9532753	AgB01_g603	-	fatty acid-binding protein-like protein	N	Y	N	N	ASU_01517	1
AgB01	9524143	9528471	AgB01_g604	.	fatty acid-binding protein-like protein	Y	Y	Y	N
AgB01	9547337	9551578	AgB01_g605	-	RecName: Full=Fatty acid-binding protein homolog; AltName: Full=AS-P18; Flags: Precursor	N	N	N	N	ASU_01514,ASU_01515,ASU_01516	3	GS_02066	1
AgB01	9542043	9549788	AgB01_g606	+	RecName: Full=Fatty acid-binding protein homolog; AltName: Full=AS-P18; Flags: Precursor	N	N	N	N	ASU_01514,ASU_01515	2	GS_02066	1
AgB01	9554738	9559449	AgB01_g607	-	Fatty acid-binding protein 3	N	N	N	N	ASU_01513	1	GS_11891	1
AgB01	9566089	9571990	AgB01_g608	+	serine threonine-protein phosphatase 4 regulatory subunit 2	N	N	N	N	ASU_01512	1	GS_12270	1
AgB01	9565724	9571990	AgB01_g609	-	serine threonine-protein phosphatase 4 regulatory subunit 2	N	N	N	N	ASU_01512	1	GS_12270	1
AgB01	9577219	9581146	AgB01_g610	+	importin-7	Y	Y	Y	N
AgB01	9595648	9602640	AgB01_g611	+	importin-7	N	N	N	N	ASU_01511	1	GS_19165	1
AgB01	9624204	9627779	AgB01_g612	+	hypothetical protein	N	N	N	N	ASU_01509,ASU_01510	2	GS_06450,GS_11101,GS_21526	3
AgB01	9615550	9615894	AgB01_g613	.	hypothetical protein	Y	Y	Y	N
AgB01	9636371	9661198	AgB01_g614	-	3-hydroxyacyl-CoA dehydratase 3	N	N	N	N	ASU_01506,ASU_01507	2	GS_12309,GS_19250	2
AgB01	9674549	9680994	AgB01_g615	-	hypothetical protein	Y	Y	Y	N
AgB01	9676126	9732772	AgB01_g616	+	atp-dependent rna helicase dhx8	N	N	N	N	ASU_01505	1	GS_03804,GS_12057,GS_12432	3
AgB01	9737385	9760093	AgB01_g617	+	atp-dependent rna helicase dhx8	N	N	N	N	ASU_01504	1	GS_04319,GS_08019,GS_14346,GS_22000	4
AgB01	9761848	9783670	AgB01_g618	+	atp-dependent rna helicase dhx8	N	N	N	N	ASU_01504	1	GS_08019,GS_15767,GS_18608	3
AgB01	9780938	9827970	AgB01_g619	-	26S proteasome non-ATPase regulatory subunit 1	Y	N	N	N			GS_14361	1
AgB01	9829225	9839454	AgB01_g620	-	26S proteasome non-ATPase regulatory subunit 1	Y	Y	Y	N
AgB01	9849617	9852828	AgB01_g621	-	beta- -galactosyl-o-glycosyl-glycoprotein beta- -n-acetylglucosaminyltransferase 4	N	N	N	N	ASU_01502	1	GS_06616	1
AgB01	9866193	9877480	AgB01_g622	-	cell death protein 3	N	N	N	N	ASU_01501	1	GS_02725,GS_08616	2
AgB01	9879008	9940828	AgB01_g623	-	hypothetical protein	N	N	N	N	ASU_01500	1	GS_11600	1
AgB01	9910355	9954308	AgB01_g624	+	hypothetical protein	Y	Y	Y	N
AgB01	9958821	9970119	AgB01_g625	+	methyltransferase-like protein 13	Y	N	N	N			GS_07534	1
AgB01	9977321	9979648	AgB01_g626	+	methyltransferase-like protein 13	Y	N	N	N			GS_00496	1
AgB01	9980830	9981776	AgB01_g627	+	methyltransferase-like protein 13	Y	Y	Y	N
AgB01	9990235	9994439	AgB01_g628	+	hypothetical protein	N	Y	N	N	ASU_01498	1
AgB01	9995218	10006574	AgB01_g629	+	hypothetical protein	N	N	N	N	ASU_01497	1	GS_03707,GS_13334	2
AgB01	10006790	10010216	AgB01_g630	-	hypothetical protein	N	N	N	N	ASU_01496	1	GS_10709	1
AgB01	10010808	10011227	AgB01_g631	-	Diamine acetyltransferase 2	Y	Y	Y	N
AgB01	10010808	10021737	AgB01_g632	+	Diamine acetyltransferase 2	N	N	N	N	ASU_01495	1	GS_11938	1
AgB01	10022448	10049541	AgB01_g633	-	Transmembrane and TPR repeat-containing protein	N	N	N	N	ASU_03951,ASU_03952,ASU_15027,ASU_15169	4	GS_03321,GS_11612	2
AgB01	10085779	10091604	AgB01_g634	-	uro-adherence factor a	N	N	N	N	ASU_03949	1	GS_21219	1
AgB01	10091705	10102652	AgB01_g635	-	uro-adherence factor a	N	N	N	N	ASU_03949	1	GS_02058,GS_21219	2
AgB01	10140299	10140645	AgB01_g636	.	hypothetical protein	Y	Y	Y	N
AgB01	10143086	10150568	AgB01_g637	+	Warthog protein 1	N	N	N	N	ASU_03948	1	GS_02333,GS_06953	2
AgB01	10150773	10152021	AgB01_g638	.	Warthog protein 1	Y	Y	Y	N
AgB01	10162215	10167936	AgB01_g639	-	warthog protein 1	N	N	N	N	ASU_03947	1	GS_05321,GS_24243	2
AgB01	10164466	10165656	AgB01_g640	.	hypothetical protein	Y	Y	Y	N
AgB01	10165747	10182304	AgB01_g641	-	hypothetical protein	N	N	N	N	ASU_03946	1	GS_04291	1
AgB01	10221978	10233284	AgB01_g642	-	serine threonine-protein phosphatase pp1 isozyme 1	N	N	N	N	ASU_03945	1	GS_02363	1
AgB01	10242033	10259561	AgB01_g643	+	glycerol kinase 5	N	N	N	N	ASU_03944	1	GS_02514,GS_20766	2
AgB01	10248229	10263299	AgB01_g644	-	DnaJ subfamily C member 3	N	N	N	N	ASU_03943	1	GS_12517,GS_20766	2
AgB01	10264032	10277911	AgB01_g645	+	60S ribosomal protein L35, partial	N	N	N	N	ASU_03942	1	GS_08502	1
AgB01	10266647	10273479	AgB01_g646	-	60S ribosomal protein L35	N	N	N	N	ASU_03942	1	GS_08502	1
AgB01	10279943	10283101	AgB01_g647	-	hypothetical protein	N	N	N	N	ASU_03941	1	GS_24272	1
AgB01	10296654	10311726	AgB01_g648	+	Heparan-sulfate 6-O-sulfotransferase 2	N	N	N	N	ASU_03939,ASU_03940	2	GS_20222,GS_20809	2
AgB01	10306062	10315133	AgB01_g649	-	helix-loop-helix 34	N	N	N	N	ASU_03939	1	GS_02963,GS_20809	2
AgB01	10323954	10330405	AgB01_g650	+	hypothetical protein	N	N	N	N	ASU_03938	1	L4_02860	1
AgB01	10337355	10340289	AgB01_g651	-	Cuticle collagen 13	Y	Y	Y	N
AgB01	10355097	10359837	AgB01_g652	-	aristaless-related homeobox protein	N	N	N	N	ASU_03936	1	GS_02210,GS_10049	2
AgB01	10359377	10366608	AgB01_g653	+	Aristaless-related homeobox protein	Y	N	N	N			GS_10049	1
AgB01	10385567	10409024	AgB01_g654	-	hypothetical protein	Y	Y	Y	N
AgB01	10391390	10391787	AgB01_g655	.	hypothetical protein	N	N	N	N	ASU_14099	1	GS_15673	1
AgB01	10462407	10473736	AgB01_g656	+	hypothetical protein	N	N	N	N	ASU_08433	1	GS_23867	1
AgB01	10473826	10475524	AgB01_g657	+	AP-3 complex subunit beta-2	Y	Y	Y	N
AgB01	10487010	10575049	AgB01_g658	-	Trophoblast glycoprotein	N	N	N	N	ASU_08432	1	GS_07472	1
AgB01	10537707	10540569	AgB01_g659	+	hypothetical protein	Y	Y	Y	N
AgB01	10591460	10613853	AgB01_g660	-	Peptidase inhibitor 16	N	N	N	N	ASU_08431	1	GS_23819	1
AgB01	10624831	10634633	AgB01_g661	-	u3 small nucleolar rna-associated protein 18-like protein	N	Y	N	N	ASU_08430	1
AgB01	10639189	10646342	AgB01_g662	+	Phosphatidylinositol transfer protein alpha isoform	N	Y	N	N	ASU_08429	1
AgB01	10653048	10661330	AgB01_g663	+	microtubule-associated protein futsch	Y	N	N	N			GS_16140	1
AgB01	10667819	10670911	AgB01_g664	+	hypothetical protein	Y	N	N	N			GS_05489	1
AgB01	10671416	10677948	AgB01_g665	+	hypothetical protein	Y	N	N	N			GS_05489,L4_00382	2
AgB01	10680457	10686506	AgB01_g666	-	hypothetical protein	N	N	N	N	ASU_08427	1	GS_18896	1
AgB01	10695692	10709703	AgB01_g667	-	phospholipase b-like 2	N	N	N	N	ASU_08426	1	GS_18334	1
AgB01	10697457	10698656	AgB01_g668	.	Phospholipase B-like protein 2	Y	Y	Y	N
AgB01	10713986	10721701	AgB01_g669	-	hypothetical protein	N	N	N	N	ASU_08425	1	GS_04132,GS_23226	2
AgB01	10737040	10740708	AgB01_g670	+	hypothetical protein	N	N	N	N	ASU_08424	1	GS_01428	1
AgB01	10756390	10757328	AgB01_g671	+	hypothetical protein	N	N	N	N	ASU_08422,ASU_08423	2	GS_02263,GS_08205	2
AgB01	10760068	10767704	AgB01_g672	-	ATP-binding cassette sub-family D member 4	N	N	N	N	ASU_08420,ASU_08421	2	GS_04098	1
AgB01	10769111	10775798	AgB01_g673	-	ATP-binding cassette sub-family D member 4, partial	N	N	N	N	ASU_08420	1	GS_09300,GS_14643,GS_21811	3
AgB01	10787140	10804652	AgB01_g674	+	atp-binding cassette sub-family d member 4	N	N	N	N	ASU_11916	1	GS_00403	1
AgB01	10807638	10816178	AgB01_g675	+	hypothetical protein	N	N	N	N	ASU_11917	1	GS_07501,GS_17085	2
AgB01	10821022	10834015	AgB01_g676	+	Pre-rRNA-processing protein pro-1	N	N	N	N	ASU_11918	1	GS_03197,GS_11948	2
AgB01	10835122	10850819	AgB01_g677	+	Methylmalonic aciduria and homocystinuria type D, partial	N	N	N	N	ASU_11919	1	GS_17058,GS_21961	2
AgB01	10855391	10856046	AgB01_g678	+	hypothetical protein	N	Y	N	N	ASU_07452	1
AgB01	10858015	10872869	AgB01_g679	+	hypothetical protein	N	N	N	N	ASU_07451	1	GS_01026	1
AgB01	10880027	10880821	AgB01_g680	-	hypothetical protein	Y	N	N	N			GS_20530	1
AgB01	10888197	10889441	AgB01_g681	+	hypothetical protein	N	Y	N	N	ASU_07453	1
AgB01	10890234	10896157	AgB01_g682	-	tRNA pseudouridine synthase 2	N	N	N	N	ASU_07454	1	GS_03063	1
AgB01	10893524	10894404	AgB01_g683	+	tRNA pseudouridine synthase 2	N	N	N	N	ASU_07454	1	GS_03063	1
AgB01	10895439	10902781	AgB01_g684	.	tRNA pseudouridine synthase 2	Y	Y	Y	N
AgB01	10897309	10910320	AgB01_g685	-	40S ribosomal protein S4	N	N	N	N	ASU_07455	1	GS_23921	1
AgB01	10906272	10913296	AgB01_g686	-	hypothetical protein	N	N	N	N	ASU_13509	1	GS_04387	1
AgB01	10920714	10932435	AgB01_g687	+	hypothetical protein	N	N	N	N	ASU_13508	1	GS_04596	1
AgB01	10937250	10944361	AgB01_g688	+	hypothetical protein	N	N	N	N	ASU_13506,ASU_13507	2	GS_02940	1
AgB01	10939499	10944384	AgB01_g689	-	hypothetical protein	N	N	N	N	ASU_13506,ASU_13507	2	GS_02940	1
AgB01	10948579	10955748	AgB01_g690	-	transcription factor sox-2	N	N	N	N	ASU_13505	1	GS_06447	1
AgB01	10989348	11005730	AgB01_g691	-	Cleavage and polyadenylation specificity factor subunit 2	N	N	N	N	ASU_11157	1	GS_09688,GS_14924	2
AgB01	11007142	11008630	AgB01_g692	+	hypothetical protein	Y	Y	Y	N
AgB01	11014053	11015306	AgB01_g693	+	hypothetical protein	N	Y	N	N	ASU_11155	1
AgB01	11019380	11024082	AgB01_g694	-	peptide methionine sulfoxide reductase	Y	Y	Y	N
AgB01	11031003	11032972	AgB01_g695	-	hypothetical protein	Y	Y	Y	N
AgB01	11057810	11063663	AgB01_g696	-	hypothetical protein	N	N	N	N	ASU_11151	1	GS_12399	1
AgB01	11071233	11076062	AgB01_g697	+	hypothetical protein	N	N	N	N	ASU_11150	1	GS_23463	1
AgB01	11078040	11085465	AgB01_g698	-	40S ribosomal protein S16	N	N	N	N	ASU_11149	1	GS_01666	1
AgB01	11088158	11098812	AgB01_g699	-	f-box domain containing protein	N	N	N	N	ASU_11148	1	GS_02223,GS_11919,GS_17307	3
AgB01	11101052	11114498	AgB01_g700	-	f-box domain containing protein	N	N	N	N	ASU_11147	1	GS_05119	1
AgB01	11115863	11129284	AgB01_g701	-	hypothetical protein	N	N	N	N	ASU_06394,ASU_11146	2	GS_10577	1
AgB01	11127099	11129192	AgB01_g702	+	hypothetical protein	N	Y	N	N	ASU_06394	1
AgB01	11144233	11163288	AgB01_g703	+	hypothetical protein	N	N	N	N	ASU_00788,ASU_06393,ASU_12924,ASU_13790	4	GS_03783,GS_08564,GS_19476,GS_22707	4
AgB01	11179848	11192423	AgB01_g704	+	hypothetical protein	Y	Y	Y	N
AgB01	11197505	11199338	AgB01_g705	+	227 kDa spindle- and centromere-associated protein	Y	Y	Y	N
AgB01	11325631	11333774	AgB01_g706	+	hypothetical protein	N	N	N	N	ASU_00789	1	GS_00710	1
AgB01	11336030	11339052	AgB01_g707	-	hypothetical protein	Y	Y	Y	N
AgB01	11343610	11377054	AgB01_g708	-	Condensin-2 complex subunit D3	Y	N	N	N			GS_07365,GS_12673,GS_20523,GS_23974	4
AgB01	11380617	11394415	AgB01_g709	+	Mitochondrial-processing peptidase subunit alpha	Y	N	N	N			GS_21699	1
AgB01	11395299	11405638	AgB01_g710	+	Glutaredoxin-C8	Y	N	N	N			GS_00804,GS_03631	2
AgB01	11400872	11413035	AgB01_g711	-	GTPase 1	Y	N	N	N			GS_00804	1
AgB01	11413193	11417097	AgB01_g712	-	Putative elongator complex protein 4	Y	N	N	N			GS_14814	1
AgB01	11425862	11452328	AgB01_g713	+	zinc c2h2 type family protein	N	N	N	N	ASU_01079	1	GS_02211,GS_21385	2
AgB01	11454304	11461985	AgB01_g714	+	Cyclin-H	N	N	N	N	ASU_01078	1	GS_05168	1
AgB01	11467199	11467645	AgB01_g715	-	hypothetical protein	Y	Y	Y	N
AgB01	11492710	11493679	AgB01_g716	-	Adenosine 3'-phospho 5'-phosphosulfate transporter 1	Y	Y	Y	N
AgB01	11504774	11518491	AgB01_g717	+	Neuronal calcium sensor 1	N	N	N	N	ASU_01077	1	GS_02948	1
AgB01	11513700	11514033	AgB01_g718	.	hypothetical protein	Y	Y	Y	N
AgB01	11520337	11535131	AgB01_g719	+	Tau-tubulin kinase 2	N	N	N	N	ASU_01076	1	GS_12912	1
AgB01	11527836	11531816	AgB01_g720	-	Tau-tubulin kinase 2	Y	Y	Y	N
AgB01	11533189	11536555	AgB01_g721	-	hypothetical protein	Y	Y	Y	N
AgB01	11549775	11564698	AgB01_g722	+	hypothetical protein	N	N	N	N	ASU_01075	1	GS_01834,GS_08526,Liv_00576	3
AgB01	11578186	11586415	AgB01_g723	-	semaphorin-5a	N	Y	N	N	ASU_01074	1
AgB01	11598144	11605325	AgB01_g724	-	hypothetical protein	N	N	N	N	ASU_01073	1	GS_05215	1
AgB01	11608246	11611548	AgB01_g725	+	hypothetical protein	Y	Y	Y	N
AgB01	11612710	11613872	AgB01_g726	+	hypothetical protein	Y	Y	Y	N
AgB01	11619561	11628095	AgB01_g727	+	hypothetical protein	N	Y	N	N	ASU_01072	1
AgB01	11625991	11654897	AgB01_g728	-	Disks large 1 tumor suppressor protein	N	N	N	N	ASU_01071	1	GS_15993,GS_20678	2
AgB01	11676747	11712753	AgB01_g729	+	integrator complex subunit 1	N	N	N	N	ASU_01070	1	GS_22544	1
AgB01	11714120	11716936	AgB01_g730	-	hypothetical protein	N	Y	N	N	ASU_01069	1
AgB01	11717988	11724354	AgB01_g731	+	hypothetical protein	N	N	N	N	ASU_01067,ASU_01068,ASU_01069	3	GS_12593,GS_18523	2
AgB01	11729477	11734527	AgB01_g732	-	Mannose-P-dolichol utilization defect 1 protein	N	N	N	N	ASU_01066	1	GS_21281	1
AgB01	11744279	11851163	AgB01_g733	-	microtubule-associated protein futsch	N	N	N	N	ASU_01065	1	GS_00541,GS_07280,GS_14529,GS_17936	4
AgB01	11749009	11756484	AgB01_g734	+	Translational activator GCN1	Y	Y	Y	N
AgB01	11770890	11774075	AgB01_g735	-	Transmembrane protein 39A	Y	Y	Y	N
AgB01	11774202	11898256	AgB01_g736	+	G-protein-signaling modulator 1	N	N	N	N	ASU_01061,ASU_01062	2	GS_02483,GS_10702	2
AgB01	11779687	11797443	AgB01_g737	+	3',5'-cyclic phosphodiesterase pde-4	Y	Y	Y	N
AgB01	11805531	11809362	AgB01_g738	-	Transthyretin-like protein 46	Y	Y	Y	N
AgB01	11811030	11823345	AgB01_g739	-	EF-hand domain-containing protein D2	N	Y	N	N	ASU_08231	1
AgB01	11827433	11830686	AgB01_g740	+	Galectin-8	Y	Y	Y	N
AgB01	11835901	11836295	AgB01_g741	.	hypothetical protein	Y	Y	Y	N
AgB01	11839494	11840096	AgB01_g742	.	microtubule-associated protein futsch	Y	Y	Y	N
AgB01	11852614	11866687	AgB01_g743	-	Transmembrane protein 39A	N	N	N	N	ASU_01063,ASU_01064	2	GS_04487,GS_23127	2
AgB01	11898917	11911896	AgB01_g744	+	Exportin-5	N	N	N	N	ASU_01060	1	GS_01383	1
AgB01	11901541	11909634	AgB01_g745	+	Exportin-5	N	N	N	N	ASU_01060	1	GS_01383	1
AgB01	11913304	11924181	AgB01_g746	+	Exportin-5	N	N	N	N	ASU_01060	1	GS_01383,Liv_04179,Liv_04631	3
AgB01	11919147	11927082	AgB01_g747	-	Exportin-5	Y	N	N	N			GS_10484,Liv_04179,Liv_04631	3
AgB01	11932728	11933379	AgB01_g748	+	putative g-protein coupled receptor	Y	Y	Y	N
AgB01	11933880	11935477	AgB01_g749	+	putative g-protein coupled receptor	N	N	N	N	ASU_01059	1	GS_17409	1
AgB01	11941592	11956528	AgB01_g750	+	Peroxisomal acyl-coenzyme A oxidase 1	N	N	N	N	ASU_01059,ASU_11249	2	GS_04069,GS_07030,GS_07577	3
AgB01	11953243	11962109	AgB01_g751	-	ribonuclease p protein 1-like protein	N	N	N	N	ASU_11250	1	GS_04069,GS_07577	2
AgB01	11963709	11993024	AgB01_g752	+	gata zinc finger domain-containing protein 1	N	N	N	N	ASU_11251	1	GS_00614	1
AgB01	11988109	12002380	AgB01_g753	-	protein unc-1	N	N	N	N	ASU_11252	1	GS_20921	1
AgB01	11994555	11995288	AgB01_g754	.	protein unc-1	Y	Y	Y	N
AgB01	12028580	12029359	AgB01_g755	.	hypothetical protein	Y	Y	Y	N
AgB01	12039873	12051219	AgB01_g756	-	LAG1 longevity assurance 5	N	N	N	N	ASU_11253	1	GS_04820	1
AgB01	12061404	12061784	AgB01_g757	+	hypothetical protein	Y	Y	Y	N
AgB01	12062912	12067756	AgB01_g758	+	nascent polypeptide-associated complex subunit alpha	N	N	N	N	ASU_11254	1	GS_14249	1
AgB01	12069175	12072826	AgB01_g759	-	60s ribosomal protein l17	N	N	N	N	ASU_11255	1	GS_12540	1
AgB01	12073008	12081713	AgB01_g760	+	hypothetical protein	N	N	N	N	ASU_11256,ASU_11257	2	GS_03277,GS_05697	2
AgB01	12076922	12086434	AgB01_g761	-	hypothetical protein	N	N	N	N	ASU_11256,ASU_11257	2	GS_01286,GS_05697	2
AgB01	12087230	12102489	AgB01_g762	-	Nucleoporin-17	N	N	N	N	ASU_09161,ASU_09162,ASU_11258	3	GS_09073,GS_19365	2
AgB01	12098484	12099112	AgB01_g763	.	hypothetical protein	Y	Y	Y	N
AgB01	12102654	12108958	AgB01_g764	-	Hydroxymethylglutaryl-CoA lyase	N	N	N	N	ASU_09161	1	GS_09073	1
AgB01	12111350	12143164	AgB01_g765	+	spectrin alpha chain	N	N	N	N	ASU_09160	1	GS_07513,L3E_00609	2
AgB01	12118257	12119147	AgB01_g766	-	Spectrin alpha chain	Y	Y	Y	N
AgB01	12143824	12163843	AgB01_g767	-	prion-like domain-bearing protein 25	N	N	N	N	ASU_09159	1	GS_02174	1
AgB01	12143895	12146533	AgB01_g768	.	prion-like domain-bearing protein 25	Y	Y	Y	N
AgB01	12155662	12161856	AgB01_g769	+	prion-like domain-bearing protein 25	N	Y	N	N	ASU_09159	1
AgB01	12165629	12169238	AgB01_g770	-	prion-like domain-bearing protein 25	Y	Y	Y	N
AgB01	12176662	12188006	AgB01_g771	+	Endoplasmic reticulum mannosyl-oligosaccharide 1,2-alpha-mannosidase	N	N	N	N	ASU_09158	1	GS_08890	1
AgB01	12189066	12203716	AgB01_g772	-	hypothetical protein	N	N	N	N	ASU_09156	1	GS_12961,GS_16692	2
AgB01	12208310	12214710	AgB01_g773	-	hypothetical protein	N	N	N	N	ASU_09155	1	GS_03188	1
AgB01	12219814	12255630	AgB01_g774	-	Poly(U)-specific endoribonuclease-like protein	N	N	N	N	ASU_10846	1	GS_10080,GS_17070,GS_23954	3
AgB01	12256158	12263781	AgB01_g775	-	Poly(U)-specific endoribonuclease-like protein	N	Y	N	N	ASU_10847,ASU_10848	2
AgB01	12265396	12281384	AgB01_g776	-	poly -specific endoribonuclease-like protein	N	N	N	N	ASU_10849	1	GS_13524	1
AgB01	12288361	12298863	AgB01_g777	+	32 kDa beta-galactoside-binding lectin	N	N	N	N	ASU_10850	1	GS_21792	1
AgB01	12323631	12332115	AgB01_g778	-	Murinoglobulin-1	N	N	N	N	ASU_07679,ASU_10851	2	GS_01253,GS_08614,GS_12266	3
AgB01	12334160	12341193	AgB01_g779	-	hypothetical protein	Y	Y	Y	N
AgB01	12389938	12405286	AgB01_g780	+	vasopressin v1a receptor	N	N	N	N	ASU_07680	1	GS_13195	1
AgB01	12413028	12448098	AgB01_g781	+	cre-gnrr-6 protein	N	N	N	N	ASU_13895,ASU_13896	2	GS_01223,GS_18479	2
AgB01	12446856	12461114	AgB01_g782	-	complement component c3-like protein	N	N	N	N	ASU_13894,ASU_13895	2	GS_01223,GS_23425	2
AgB01	12479135	12524896	AgB01_g783	-	Neurogenic locus Notch protein	N	N	N	N	ASU_12551,ASU_12768,ASU_15237	3	GS_04082,GS_06401,GS_09735,GS_13230	4
AgB01	12548968	12555769	AgB01_g784	-	60s ribosomal protein l5	N	N	N	N	ASU_12769	1	GS_19696	1
AgB01	12559861	12561790	AgB01_g785	+	Transposon-derived protein, partial	N	N	N	N	ASU_12770	1	GS_06249	1
AgB01	12568239	12574974	AgB01_g786	-	Surfeit locus protein 4	N	N	N	N	ASU_12771	1	GS_12807	1
AgB01	12568396	12575174	AgB01_g787	+	Surfeit locus protein 4	N	N	N	N	ASU_12771	1	GS_12807	1
AgB01	12577222	12577672	AgB01_g788	.	Surfeit locus protein 4	Y	Y	Y	N
AgB01	12579339	12579479	AgB01_g789	.	Surfeit locus protein 4	Y	Y	Y	N
AgB01	12589210	12619526	AgB01_g790	+	dyslexia-associated protein	N	N	N	N	ASU_12772,ASU_14794	2	GS_07477,GS_24335	2
AgB01	12622152	12640924	AgB01_g791	+	Trafficking protein particle complex subunit 9	N	Y	N	N	ASU_11170	1
AgB01	12659368	12669998	AgB01_g792	-	Activin receptor type-2A	Y	N	N	N			GS_14849	1
AgB01	12672219	12672515	AgB01_g793	+	hypothetical protein	Y	Y	Y	N
AgB01	12672816	12673397	AgB01_g794	+	hypothetical protein	Y	Y	Y	N
AgB01	12681633	12682255	AgB01_g795	.	Uncharacterized protein U88	Y	Y	Y	N
AgB01	12692375	12692873	AgB01_g796	.	hypothetical protein	Y	Y	Y	N
AgB01	12694501	12715711	AgB01_g797	-	RdRP3	N	N	N	N	ASU_11171	1	GS_04016,GS_10976	2
AgB01	12717548	12723717	AgB01_g798	-	rna-dependent rna polymerase 3	Y	Y	Y	N
AgB01	12730188	12751609	AgB01_g799	-	Dual specificity mitogen-activated protein kinase kinase 7	Y	N	N	N			GS_13442,GS_17908	2
AgB01	12753085	12757429	AgB01_g800	-	hypothetical protein	N	N	N	N	ASU_11173	1	GS_21086	1
AgB01	12761444	12795194	AgB01_g801	-	intracellular protein transport protein uso1	N	N	N	N	ASU_11174	1	GS_02695,GS_15595	2
AgB01	12814580	12816526	AgB01_g802	+	hypothetical protein	Y	Y	Y	N
AgB01	12820572	12832499	AgB01_g803	+	hypothetical protein	N	N	N	N	ASU_10089	1	GS_09029,GS_16836,L4_01084,Liv_00350	4
AgB01	12832136	12846056	AgB01_g804	-	Cytokinesis defective protein 7	N	N	N	N	ASU_10088	1	GS_09029,Liv_00350	2
AgB01	12844215	12849716	AgB01_g805	-	hypothetical protein	Y	N	N	N			GS_21981	1
AgB01	12851730	12856079	AgB01_g806	+	Leucine-rich repeat-containing protein 59	N	N	N	N	ASU_10086,ASU_10087	2	GS_10042	1
AgB01	12858101	12876401	AgB01_g807	-	Leucine-rich repeat-containing protein 59	N	N	N	N	ASU_10084	1	GS_04335	1
AgB01	12879820	12887124	AgB01_g808	-	hypothetical protein	N	N	N	N	ASU_10082,ASU_10083	2	GS_20615,GS_21366	2
AgB01	12890528	12907680	AgB01_g809	-	G-protein coupled receptor, partial	N	N	N	N	ASU_10081	1	GS_01507,GS_02994,GS_22885	3
AgB01	12965950	12978439	AgB01_g810	-	long-chain fatty acid transport protein 4	N	N	N	N	ASU_10080	1	GS_01486,GS_20306	2
AgB01	12983228	12983620	AgB01_g811	.	hypothetical protein	Y	Y	Y	N
AgB01	12998717	13004688	AgB01_g812	+	Corepressor interacting with RBPJ 1	N	N	N	N	ASU_07133	1	GS_07411	1
AgB01	13011487	13030940	AgB01_g813	-	ubiquitin carboxyl-terminal hydrolase 16	N	N	N	N	ASU_07134	1	GS_03333,GS_13861,GS_22284	3
AgB01	13027905	13030985	AgB01_g814	-	ubiquitin carboxyl-terminal hydrolase 16	Y	N	N	N			GS_13861	1
AgB01	13035266	13038445	AgB01_g815	+	Putative RNA-directed DNA polymerase from transposon X-element (Fragment)	N	Y	N	N	ASU_07135	1
AgB01	13040261	13057043	AgB01_g816	+	IWS1-like protein	N	N	N	N	ASU_07136,ASU_07137	2	GS_00155,GS_17690	2
AgB01	13079193	13084606	AgB01_g817	+	hypothetical protein	N	N	N	N	ASU_07139	1	GS_07202	1
AgB01	13094395	13100920	AgB01_g818	-	Isoaspartyl peptidase	N	N	N	N	ASU_07140	1	GS_13577	1
AgB01	13111977	13136528	AgB01_g819	+	Transcription elongation factor B polypeptide 3	N	N	N	N	ASU_07140,ASU_07141,ASU_07142	3	GS_10358,GS_19595,GS_21871	3
AgB01	13148641	13148877	AgB01_g820	-	hypothetical protein	Y	Y	Y	N
AgB01	13149047	13149382	AgB01_g821	+	hypothetical protein	Y	Y	Y	N
AgB01	13155067	13166871	AgB01_g822	+	Lysine-specific demethylase 8	N	N	N	N	ASU_07144	1	GS_08188	1
AgB01	13167365	13206923	AgB01_g823	+	hypothetical protein	N	N	N	N	ASU_07145,ASU_07146	2	GS_06889,GS_14166,GS_16897,L4_03999	4
AgB01	13210593	13225062	AgB01_g824	+	beta-hexosaminidase a	N	N	N	N	ASU_07147	1	GS_00117,GS_10340	2
AgB01	13216115	13218249	AgB01_g825	-	beta-hexosaminidase a	Y	N	N	N			GS_10340	1
AgB01	13225777	13229836	AgB01_g826	+	hypothetical protein	N	N	N	N	ASU_07148	1	GS_03562	1
AgB01	13231039	13240583	AgB01_g827	-	Carbonic anhydrase 5	N	N	N	N	ASU_07149	1	GS_22570	1
AgB01	13248794	13275395	AgB01_g828	-	Protein-associating with the carboxyl-terminal domain of ezrin	N	N	N	N	ASU_07150,ASU_07151,ASU_07152	3	GS_01812,GS_15785,GS_18266	3
AgB01	13282849	13285753	AgB01_g829	+	hypothetical protein	N	N	N	Y	ASU_07152,ASU_07153,ASU_07154	3	GS_02615,GS_18266	2
AgB01	13298173	13299642	AgB01_g830	-	hypothetical protein	Y	Y	Y	Y
AgB01	13301817	13311423	AgB01_g831	-	hypothetical protein	Y	Y	Y	Y
AgB01	13313984	13328344	AgB01_g832	-	ubiquitin carboxyl-terminal hydrolase 7	N	N	N	Y	ASU_13419	1	GS_04615,GS_07750,GS_10327	3
AgB01	13330099	13338065	AgB01_g833	+	hypothetical protein	N	N	N	Y	ASU_13418	1	GS_04615,GS_10327	2
AgB01	13339399	13362208	AgB01_g834	+	Solute carrier family 2, facilitated glucose transporter member 5	N	N	N	Y	ASU_13417	1	GS_05066,GS_10972	2
AgB01	13339412	13361435	AgB01_g835	-	Solute carrier family 2, facilitated glucose transporter member 5	Y	N	N	Y			GS_05066	1
AgB01	13362306	13369051	AgB01_g836	-	hypothetical protein	N	Y	N	Y	ASU_13416	1
AgB02	17563	39855	AgB02_g001	+	FACT complex subunit SSRP1-A	N	Y	N	N	ASU_15080,ASU_15081	2
AgB02	40565	43433	AgB02_g002	+	FACT complex subunit SSRP1-A	N	Y	N	N	ASU_06177,ASU_15281	2
AgB02	78227	78974	AgB02_g003	+	hypothetical protein	N	Y	N	N	ASU_03659	1
AgB02	80921	89005	AgB02_g004	-	cre-edc-3 protein	Y	Y	Y	N
AgB02	99635	100285	AgB02_g005	-	hypothetical protein	Y	Y	Y	N
AgB02	114377	119056	AgB02_g006	+	hypothetical protein	N	N	N	N	ASU_02133	1	GS_05124	1
AgB02	119926	145696	AgB02_g007	-	Protein capicua	N	N	N	N	ASU_10300	1	GS_05771	1
AgB02	157844	182655	AgB02_g008	-	Protein capicua	N	N	N	N	ASU_08828	1	GS_05771	1
AgB02	227112	245313	AgB02_g009	+	Dual specificity mitogen-activated protein kinase kinase 6	N	N	N	N	ASU_08829	1	GS_08586	1
AgB02	247525	254189	AgB02_g010	-	hypothetical protein	N	N	N	N	ASU_08830	1	GS_09198,GS_09663	2
AgB02	256175	263086	AgB02_g011	-	hypothetical protein	N	N	N	N	ASU_08830	1	GS_09663	1
AgB02	262633	265987	AgB02_g012	+	hypothetical protein	Y	Y	Y	N
AgB02	269384	273149	AgB02_g013	+	hypothetical protein	Y	N	N	N			GS_05538	1
AgB02	274587	297197	AgB02_g014	-	putative phosphoribosylformylglycinamidine synthase	N	Y	N	N	ASU_08831	1
AgB02	309272	318639	AgB02_g015	-	Retrotransposable element Tf2 155 kDa protein type 1	N	Y	N	N	ASU_08832	1
AgB02	314117	314478	AgB02_g016	.	hypothetical protein	Y	Y	Y	N
AgB02	320497	337469	AgB02_g017	+	Transient receptor potential cation channel subfamily M member 6	N	Y	N	N	ASU_08833	1
AgB02	338093	339846	AgB02_g018	-	hypothetical protein	Y	Y	Y	N
AgB02	348601	363649	AgB02_g019	+	neprilysin-1	N	N	N	N	ASU_09400	1	GS_03528,GS_21280	2
AgB02	367026	377033	AgB02_g020	-	neprilysin-2	N	N	N	N	ASU_09399	1	GS_19018	1
AgB02	386467	389740	AgB02_g021	-	hypothetical protein	N	N	N	N	ASU_09398	1	GS_13663	1
AgB02	390361	391537	AgB02_g022	-	hypothetical protein	Y	Y	Y	N
AgB02	395070	395507	AgB02_g023	.	hypothetical protein	Y	Y	Y	N
AgB02	401636	408232	AgB02_g024	-	hypothetical protein	N	N	N	N	ASU_09396,ASU_09397	2	GS_05628,GS_21784	2
AgB02	430135	436674	AgB02_g025	-	immunoglobulin i-set domain containing protein	N	N	N	N	ASU_09395	1	GS_22093	1
AgB02	459487	471421	AgB02_g026	+	hypothetical protein	N	N	N	N	ASU_09393,ASU_09394	2	GS_04967,GS_12865,GS_23739	3
AgB02	472031	485714	AgB02_g027	-	Metal transporter CNNM4	N	N	N	N	ASU_09392	1	GS_03779,GS_10528,GS_24012	3
AgB02	499496	500779	AgB02_g028	+	Mannosyl-oligosaccharide glucosidase	Y	Y	Y	N
AgB02	518069	530338	AgB02_g029	-	putative mannosyl-oligosaccharide glucosidase	N	N	N	N	ASU_09403	1	GS_17273	1
AgB02	544877	545691	AgB02_g030	+	Serine/threonine-protein kinase dkf-2	Y	Y	Y	N
AgB02	545966	563012	AgB02_g031	+	Phosphatidylinositol-4-phosphate 3-kinase C2 domain-containing subunit alpha	N	N	N	N	ASU_05849,ASU_09404	2	GS_00693,GS_05342,GS_10240	3
AgB02	587742	589224	AgB02_g032	+	phosphatidylinositol-4-phosphate 3-kinase c2 domain-containing subunit alpha	Y	Y	Y	N
AgB02	643064	644079	AgB02_g033	+	Ninein	N	N	N	N	ASU_05850	1	GS_12235	1
AgB02	656884	667278	AgB02_g034	-	dna topoisomerase 2-alpha	N	N	N	N	ASU_05851	1	GS_02097,GS_04457	2
AgB02	667836	682773	AgB02_g035	-	Dicarboxylate carrier	N	N	N	N	ASU_05852	1	GS_07468	1
AgB02	681604	682159	AgB02_g036	.	hypothetical protein	Y	Y	Y	N
AgB02	689628	700053	AgB02_g037	-	lipase maturation factor 2	N	N	N	N	ASU_05853	1	GS_19960	1
AgB02	703700	703997	AgB02_g038	.	hypothetical protein	Y	Y	Y	N
AgB02	707192	717237	AgB02_g039	-	C-1-tetrahydrofolate synthase	N	N	N	N	ASU_05854	1	GS_01153	1
AgB02	730702	742023	AgB02_g040	-	hypothetical protein	N	N	N	N	ASU_05855	1	GS_12711	1
AgB02	745851	760065	AgB02_g041	+	Oxidoreductase dhs-27	N	N	N	N	ASU_05856	1	GS_04687	1
AgB02	775084	797544	AgB02_g042	+	poly -specific ribonuclease parn	N	N	N	N	ASU_05857	1	GS_15557	1
AgB02	799807	834260	AgB02_g043	-	hypothetical protein	N	N	N	N	ASU_05859	1	GS_13908	1
AgB02	804429	815468	AgB02_g044	.	Retrotransposable element Tf2 155 kDa protein type 1	Y	Y	Y	N
AgB02	843668	857833	AgB02_g045	-	solute carrier organic anion transporter family member 4c1	N	N	N	N	ASU_05861	1	GS_21301	1
AgB02	865525	866266	AgB02_g046	.	hypothetical protein	Y	Y	Y	N
AgB02	894508	906457	AgB02_g047	+	Transforming protein p68/c-ets-1	N	N	N	N	ASU_08117,ASU_08118	2	GS_09977	1
AgB02	894875	912697	AgB02_g048	-	Transforming protein p68/c-ets-1	N	N	N	N	ASU_08117,ASU_08118	2	GS_09977	1
AgB02	924778	947622	AgB02_g049	-	Type I inositol-1,4,5-trisphosphate 5-phosphatase	N	N	N	N	ASU_08116	1	GS_03934,GS_10880	2
AgB02	944860	950892	AgB02_g050	+	Type I inositol-1,4,5-trisphosphate 5-phosphatase	Y	N	N	N			GS_03934,L4_01306	2
AgB02	1019377	1031064	AgB02_g051	+	paired box protein pax-6	N	N	N	N	ASU_08111,ASU_08112,ASU_08114,ASU_08115	4	GS_20428,L3E_01355	2
AgB02	974925	979852	AgB02_g052	-	hypothetical protein	N	N	N	N	ASU_08114,ASU_08115	2	L3E_01355	1
AgB02	1010470	1016291	AgB02_g053	-	hypothetical protein	Y	Y	Y	N
AgB02	1034769	1038419	AgB02_g054	-	Guanine nucleotide-binding protein subunit gamma-e	N	Y	N	N	ASU_08110	1
AgB02	1053871	1055206	AgB02_g055	.	hypothetical protein	Y	Y	Y	N
AgB02	1061988	1062443	AgB02_g056	-	hypothetical protein	Y	Y	Y	N
AgB02	1066784	1072699	AgB02_g057	-	hypothetical protein	Y	N	N	N			GS_00925,GS_21447	2
AgB02	1070806	1072853	AgB02_g058	-	hypothetical protein	N	N	N	N	ASU_08109	1	GS_08253	1
AgB02	1077764	1100006	AgB02_g059	+	hypothetical protein	N	N	N	N	ASU_08108	1	GS_02240,GS_12677,GS_23195	3
AgB02	1106445	1107860	AgB02_g060	.	Transposon-derived protein, partial	Y	Y	Y	N
AgB02	1116529	1132991	AgB02_g061	+	tbc1 domain family member 16	N	N	N	N	ASU_05846	1	GS_24177	1
AgB02	1149466	1193973	AgB02_g062	+	copine-5	N	N	N	N	ASU_05847	1	GS_08491	1
AgB02	1156894	1157528	AgB02_g063	.	hypothetical protein	Y	Y	Y	N
AgB02	1179117	1179493	AgB02_g064	.	hypothetical protein	Y	Y	Y	N
AgB02	1198081	1198474	AgB02_g065	.	hypothetical protein	Y	Y	Y	N
AgB02	1200781	1223694	AgB02_g066	-	protein tweety-like protein 1	N	N	N	N	ASU_05848	1	GS_05760	1
AgB02	1237017	1243132	AgB02_g067	-	hypothetical protein	N	N	N	N	ASU_11821,ASU_11822	2	GS_13465,GS_21431	2
AgB02	1253391	1278903	AgB02_g068	-	Leucine-rich repeat protein soc-2	N	N	N	N	ASU_11823	1	GS_08943	1
AgB02	1297339	1343582	AgB02_g069	-	hypothetical protein	N	N	N	N	ASU_11824	1	GS_08943	1
AgB02	1299145	1299539	AgB02_g070	.	hypothetical protein	Y	Y	Y	N
AgB02	1300093	1301006	AgB02_g071	.	hypothetical protein	Y	Y	Y	N
AgB02	1361717	1372748	AgB02_g072	+	hypothetical protein	N	N	N	N	ASU_08483	1	GS_20405	1
AgB02	1375118	1377442	AgB02_g073	+	Acetylcholine receptor subunit alpha-type deg-3	N	N	N	N	ASU_08484	1	GS_11548	1
AgB02	1379913	1380978	AgB02_g074	+	hypothetical protein	Y	Y	Y	N
AgB02	1386320	1401116	AgB02_g075	-	putative g-protein coupled receptor	N	N	N	N	ASU_08485,ASU_08486,ASU_08487	3	GS_02219,GS_18440	2
AgB02	1416331	1436076	AgB02_g076	+	hypothetical protein	N	N	N	N	ASU_08488,ASU_09880	2	GS_02574,GS_20189	2
AgB02	1430334	1430762	AgB02_g077	.	hypothetical protein	Y	Y	Y	N
AgB02	1437133	1437486	AgB02_g078	.	hypothetical protein	Y	Y	Y	N
AgB02	1438195	1466670	AgB02_g079	-	Glycosyltransferase AER61	N	N	N	N	ASU_09878	1	GS_15188	1
AgB02	1442801	1449805	AgB02_g080	+	hypothetical protein	N	N	N	N	ASU_09879	1	GS_05009	1
AgB02	1473261	1473792	AgB02_g081	.	hypothetical protein	Y	Y	Y	N
AgB02	1473964	1474524	AgB02_g082	.	hypothetical protein	Y	Y	Y	N
AgB02	1478544	1479179	AgB02_g083	.	hypothetical protein	Y	Y	Y	N
AgB02	1497593	1512684	AgB02_g084	+	Myotubularin-related protein 5, partial	N	N	N	N	ASU_09877	1	GS_03816,GS_14586	2
AgB02	1516049	1524169	AgB02_g085	-	putative oxidoreductase dhs-27	N	N	N	N	ASU_09875,ASU_09876	2	GS_21456	1
AgB02	1534563	1538896	AgB02_g086	+	Ras association domain-containing protein 1	N	N	N	N	ASU_09874	1	GS_21323,L4_03269	2
AgB02	1566831	1567220	AgB02_g087	-	hypothetical protein	Y	Y	Y	N
AgB02	1570521	1577999	AgB02_g088	+	vesicular acetylcholine transporter unc-17	N	N	N	N	ASU_09871,ASU_09872	2	GS_00532,GS_07299,GS_13556,L3E_00423	4
AgB02	1572127	1572436	AgB02_g089	.	hypothetical protein	N	N	N	N	ASU_09873	1	L3E_03436	1
AgB02	1633240	1640038	AgB02_g090	+	vasopressin v1a receptor	N	N	N	N	ASU_14275	1	GS_10987,GS_19058	2
AgB02	1655088	1681841	AgB02_g091	-	Epidermal growth factor receptor kinase substrate 8-like protein 2	N	N	N	N	ASU_14276,ASU_14277	2	GS_09076	1
AgB02	1684441	1684904	AgB02_g092	.	hypothetical protein	Y	Y	Y	N
AgB02	1690038	1696218	AgB02_g093	-	hypothetical protein	Y	Y	Y	N
AgB02	1703508	1708749	AgB02_g094	-	hypothetical protein	N	N	N	N	ASU_09591	1	GS_12905	1
AgB02	1709640	1720160	AgB02_g095	-	protein phosphatase 1h	N	N	N	N	ASU_09592	1	GS_19803	1
AgB02	1722654	1727759	AgB02_g096	-	cuticlin-1	N	N	N	N	ASU_09593	1	GS_15531	1
AgB02	1735682	1759949	AgB02_g097	-	Neuronal acetylcholine receptor subunit alpha-10	N	N	N	N	ASU_09594	1	GS_09964	1
AgB02	1775522	1783386	AgB02_g098	+	nematode cuticle collagen n-terminal domain containing protein	N	N	N	N	ASU_09595	1	GS_10110	1
AgB02	1792470	1794258	AgB02_g099	+	transmembrane protein 87a	Y	Y	Y	N
AgB02	1795212	1796416	AgB02_g100	+	Calcium/calmodulin-dependent protein kinase kinase 2	Y	Y	Y	N
AgB02	1842828	1843397	AgB02_g101	.	hypothetical protein	Y	Y	Y	N
AgB02	1848072	1907975	AgB02_g102	+	Neuroglian	N	N	N	N	ASU_09598,ASU_09599	2	GS_19815,L3E_00577	2
AgB02	1910195	1910925	AgB02_g103	-	hypothetical protein	Y	Y	Y	N
AgB02	1910974	1914930	AgB02_g104	-	LINE-1 reverse transcriptase	Y	Y	Y	N
AgB02	1918644	1923105	AgB02_g105	+	hypothetical protein	N	N	N	N	ASU_09600	1	GS_03309,GS_15715	2
AgB02	1930230	1943243	AgB02_g106	-	Collagen alpha-5(VI) chain	N	N	N	N	ASU_10647,ASU_14349	2	GS_03077	1
AgB02	1951034	1955267	AgB02_g107	+	hypothetical protein	N	Y	N	N	ASU_14350	1
AgB02	1960261	1969353	AgB02_g108	+	hypothetical protein	N	N	N	N	ASU_14351	1	GS_01781	1
AgB02	1971224	1979794	AgB02_g109	-	hypothetical protein	N	N	N	N	ASU_14352	1	GS_06071,GS_23389	2
AgB02	1979191	1979858	AgB02_g110	.	hypothetical protein	Y	N	N	N			GS_23389	1
AgB02	1995085	1995441	AgB02_g111	-	hypothetical protein	Y	Y	Y	N
AgB02	1998794	2044255	AgB02_g112	+	Protein VPRBP	N	N	N	N	ASU_10654	1	GS_05266,GS_12281,GS_22651	3
AgB02	2048215	2057574	AgB02_g113	-	WASH complex subunit FAM21A	N	N	N	N	ASU_10653	1	GS_00406	1
AgB02	2073570	2082938	AgB02_g114	+	Dual specificity mitogen-activated protein kinase kinase 2	N	N	N	N	ASU_10652	1	GS_01769,GS_06432	2
AgB02	2079754	2097953	AgB02_g115	-	patatin-like phospholipase domain-containing protein 2	N	N	N	N	ASU_10651	1	GS_22039	1
AgB02	2114141	2115317	AgB02_g116	+	hypothetical protein	N	N	N	N	ASU_10650	1	GS_07434	1
AgB02	2117655	2129496	AgB02_g117	-	hypothetical protein	N	N	N	N	ASU_06026,ASU_10649	2	GS_02816,GS_07140	2
AgB02	2132845	2148668	AgB02_g118	-	Tyramine receptor ser-2	N	N	N	N	ASU_06025	1	GS_12004,GS_16218	2
AgB02	2133140	2133861	AgB02_g119	.	truncated TA/OA receptor	Y	Y	Y	N
AgB02	2158424	2187549	AgB02_g120	+	Prominin-1-A	N	N	N	N	ASU_06022,ASU_06023	2	GS_03230,GS_10136,GS_17116,L3E_00694	4
AgB02	2183505	2198349	AgB02_g121	-	prominin-1-a	N	N	N	N	ASU_06023	1	GS_03230,L3E_00694	2
AgB02	2214263	2270585	AgB02_g122	+	Phosphatidylinositol 4-kinase type 2-beta	N	N	N	N	ASU_06006,ASU_06021	2	GS_18409	1
AgB02	2222091	2246946	AgB02_g123	-	Major antigen	Y	N	N	N			L3E_01394,L3E_02188,L4_02924	3
AgB02	2275878	2287089	AgB02_g124	+	Zinc metalloproteinase nas-30	N	N	N	N	ASU_06007	1	GS_05520,GS_11142	2
AgB02	2298757	2315574	AgB02_g125	-	zinc finger protein	N	N	N	N	ASU_06008	1	GS_02326	1
AgB02	2305939	2306334	AgB02_g126	.	hypothetical protein	Y	Y	Y	N
AgB02	2330424	2341336	AgB02_g127	-	hypothetical protein	N	Y	N	N	ASU_06009	1
AgB02	2349796	2394900	AgB02_g128	-	Protein neuralized	N	N	N	N	ASU_06010	1	GS_21338	1
AgB02	2391053	2391524	AgB02_g129	.	hypothetical protein	Y	Y	Y	N
AgB02	2416380	2425562	AgB02_g130	+	choline ethanolamine kinase	N	N	N	N	ASU_06011	1	GS_05798	1
AgB02	2430362	2437046	AgB02_g131	+	39S ribosomal protein L47	N	N	N	N	ASU_06012	1	GS_23265	1
AgB02	2437289	2447735	AgB02_g132	+	RecName: Full=V-type proton ATPase 16 kDa proteolipid subunit; Short=V-ATPase 16 kDa proteolipid subunit; AltName: Full=Vacuolar proton pump 16 kDa proteolipid subunit	N	N	N	N	ASU_06013	1	GS_03398,GS_23265	2
AgB02	2441766	2454478	AgB02_g133	-	Serine/threonine-protein kinase ULK3	N	N	N	N	ASU_06013,ASU_06014	2	GS_03398,GS_08889	2
AgB02	2462863	2463766	AgB02_g134	+	zinc metalloproteinase nas-15	N	N	N	N	ASU_06015	1	GS_10627	1
AgB02	2473583	2474927	AgB02_g135	+	hypothetical protein	N	Y	N	N	ASU_06016	1
AgB02	2476042	2490699	AgB02_g136	-	Nucleoside-diphosphatase mig-23	N	N	N	N	ASU_06017,ASU_06018	2	GS_00863,GS_14339,GS_21656	3
AgB02	2482187	2483526	AgB02_g137	.	Transposon-derived protein	Y	Y	Y	N
AgB02	2487744	2493984	AgB02_g138	+	Small heat shock protein OV25-2	N	N	N	N	ASU_06018	1	GS_00863,GS_14339	2
AgB02	2494172	2495505	AgB02_g139	-	Small heat shock protein OV25-2	Y	Y	Y	N
AgB02	2499453	2507668	AgB02_g140	+	transmembrane emp24 domain-containing protein 5	N	N	N	N	ASU_06019	1	GS_13370	1
AgB02	2509957	2510253	AgB02_g141	+	hypothetical protein	Y	Y	Y	N
AgB02	2517356	2517670	AgB02_g142	-	hypothetical protein	Y	Y	Y	N
AgB02	2524494	2533658	AgB02_g143	+	cyclin-dependent kinase 20	N	N	N	N	ASU_06367,ASU_06368	2	GS_10272,Liv_02900	2
AgB02	2534741	2538116	AgB02_g144	-	G-protein coupled receptor	Y	N	N	N			GS_11416	1
AgB02	2538500	2540743	AgB02_g145	-	g-protein coupled receptor	N	N	N	N	ASU_06366	1	GS_11416	1
AgB02	2544571	2545060	AgB02_g146	+	hypothetical protein	N	Y	N	N	ASU_06365	1
AgB02	2555147	2610644	AgB02_g147	-	Protein FAM38B	N	N	N	N	ASU_06364	1	GS_20362,GS_21928	2
AgB02	2604462	2604994	AgB02_g148	.	hypothetical protein	Y	Y	Y	N
AgB02	2621647	2632318	AgB02_g149	-	synaptobrevin family protein	N	N	N	N	ASU_06363	1	GS_13273	1
AgB02	2640543	2671376	AgB02_g150	+	Bifunctional aminoacyl-tRNA synthetase, partial	N	N	N	N	ASU_06362	1	GS_04363,GS_09587	2
AgB02	2675011	2686269	AgB02_g151	+	Serine/threonine-protein kinase pink-1	N	N	N	N	ASU_06361	1	GS_18339	1
AgB02	2696082	2697867	AgB02_g152	-	hypothetical protein	N	N	N	N	ASU_06360	1	GS_16784	1
AgB02	2709975	2716708	AgB02_g153	-	Cytochrome P450 4C1	N	N	N	N	ASU_06359	1	GS_09759	1
AgB02	2727475	2740721	AgB02_g154	+	chloride intracellular channel exl-1	N	N	N	N	ASU_06358	1	GS_18344,GS_23489	2
AgB02	2764996	2770730	AgB02_g155	+	hypothetical protein	N	N	N	N	ASU_06357	1	GS_02179,GS_03030,GS_07913	3
AgB02	2770975	2784521	AgB02_g156	-	hypothetical protein	N	N	N	N	ASU_06354,ASU_06355,ASU_06356	3	GS_02179,GS_07913,GS_19951	3
AgB02	2776718	2778719	AgB02_g157	+	hypothetical protein	N	N	N	N	ASU_06355,ASU_06356	2	GS_19951	1
AgB02	2786754	2791236	AgB02_g158	+	hypothetical protein	N	N	N	N	ASU_06353	1	GS_22315	1
AgB02	2793328	2836153	AgB02_g159	-	Potassium voltage-gated channel protein Shaker	N	N	N	N	ASU_06352	1	GS_13069	1
AgB02	2862628	2874939	AgB02_g160	-	aquaporin-10	N	N	N	N	ASU_14520	1	GS_06375,GS_10924	2
AgB02	2897214	2902109	AgB02_g161	+	Putative G-protein coupled receptor	Y	N	N	N			GS_05603,GS_11047	2
AgB02	2903072	2904467	AgB02_g162	.	Uncharacterized protein U88	Y	Y	Y	N
AgB02	2915330	2925317	AgB02_g163	-	Potassium channel regulatory protein unc-93	Y	N	N	N			GS_09460	1
AgB02	2938194	2941733	AgB02_g164	+	Uncharacterized protein B0302.5	Y	N	N	N			GS_09966	1
AgB02	2968484	2969171	AgB02_g165	+	ligand-gated ion channel 50	Y	N	N	N			GS_01451	1
AgB02	2989412	2992713	AgB02_g166	-	hypothetical protein	Y	Y	Y	N
AgB02	2994320	2996223	AgB02_g167	-	hypothetical protein	Y	N	N	N			GS_14230	1
AgB02	3006872	3028836	AgB02_g168	+	Sodium/chloride cotransporter 3	N	Y	N	N	ASU_06351	1
AgB02	3032728	3051381	AgB02_g169	+	dihydroxyacetone phosphate acyltransferase	N	N	N	N	ASU_02619	1	GS_15604	1
AgB02	3060708	3069814	AgB02_g170	-	t family of potassium channels protein 9	N	N	N	N	ASU_02620	1	GS_22175	1
AgB02	3070199	3070525	AgB02_g171	+	hypothetical protein	Y	Y	Y	N
AgB02	3094798	3106233	AgB02_g172	+	monocarboxylate transporter 3	N	N	N	N	ASU_02621	1	GS_00747	1
AgB02	3095686	3096510	AgB02_g173	-	Monocarboxylate transporter 3	Y	Y	Y	N
AgB02	3107781	3123357	AgB02_g174	-	Cell cycle checkpoint protein RAD17	N	N	N	N	ASU_02622	1	GS_16963	1
AgB02	3125693	3154660	AgB02_g175	-	Tetraspanin-33	N	N	N	N	ASU_02623	1	GS_13190,GS_20568	2
AgB02	3153233	3153909	AgB02_g176	.	hypothetical protein	Y	Y	Y	N
AgB02	3161035	3169014	AgB02_g177	-	Ubiquitin-associated and SH3 domain-containing protein B	N	N	N	N	ASU_14066	1	GS_05988	1
AgB02	3170928	3181008	AgB02_g178	-	hypothetical protein	N	N	N	N	ASU_14065	1	GS_10482	1
AgB02	3185345	3191117	AgB02_g179	-	protein ubash3a-like protein	N	N	N	N	ASU_14064	1	GS_11179	1
AgB02	3196727	3201856	AgB02_g180	-	hypothetical protein	N	N	N	N	ASU_14062,ASU_14063	2	GS_04021	1
AgB02	3210907	3237294	AgB02_g181	-	Casein kinase I isoform epsilon	N	N	N	N	ASU_05037	1	GS_07459	1
AgB02	3231852	3239889	AgB02_g182	+	hypothetical protein	N	N	N	N	ASU_05035	1	GS_03865,GS_16821	2
AgB02	3239149	3248600	AgB02_g183	-	As37	N	N	N	N	ASU_05034	1	GS_16821,GS_23527	2
AgB02	3248405	3251641	AgB02_g184	+	hypothetical protein	N	Y	N	N	ASU_05033	1
AgB02	3263301	3265231	AgB02_g185	+	cre-stg-2 protein	N	N	N	N	ASU_05032	1	GS_06913	1
AgB02	3265422	3280299	AgB02_g186	-	Glycosyltransferase-like protein	N	N	N	N	ASU_05031	1	GS_03364	1
AgB02	3303619	3328516	AgB02_g187	+	Stress-activated protein kinase JNK	N	N	N	N	ASU_05030	1	GS_12999,GS_14120,GS_21286	3
AgB02	3325033	3344718	AgB02_g188	-	Guanine nucleotide-binding protein G(o) subunit alpha	N	N	N	N	ASU_05027,ASU_05028,ASU_05029	3	GS_00495,GS_14120,GS_18137	3
AgB02	3345260	3350147	AgB02_g189	-	hypothetical protein	N	N	N	N	ASU_05026	1	GS_09828	1
AgB02	3350381	3355354	AgB02_g190	+	WD repeat-containing protein mio	Y	N	N	N			GS_17671	1
AgB02	3363696	3376108	AgB02_g191	+	WD repeat-containing protein mio	N	N	N	N	ASU_05025	1	GS_18679	1
AgB02	3371329	3388007	AgB02_g192	-	TWiK family of potassium channels protein 18	N	N	N	N	ASU_05024	1	GS_19632	1
AgB02	3391619	3397031	AgB02_g193	+	hypothetical protein	N	N	N	N	ASU_05023	1	GS_03949,L4_05195	2
AgB02	3397347	3409817	AgB02_g194	-	Myotubularin-related protein 9	N	N	N	N	ASU_05022	1	GS_04043	1
AgB02	3397410	3409849	AgB02_g195	+	Myotubularin-related protein 9	Y	Y	Y	N
AgB02	3412844	3441522	AgB02_g196	+	Protein NCOAT	N	N	N	N	ASU_05021	1	GS_06736,GS_13513,GS_15310,GS_20509	4
AgB02	3448512	3470871	AgB02_g197	+	DCC-interacting protein 13-alpha	N	N	N	N	ASU_05020	1	GS_14828	1
AgB02	3475792	3489057	AgB02_g198	+	c-type lectin domain-containing protein	N	N	N	N	ASU_05019	1	GS_06275,GS_07840,GS_13106	3
AgB02	3489310	3513731	AgB02_g199	-	Serine/threonine-protein phosphatase 2B catalytic subunit 2	N	N	N	N	ASU_05018	1	GS_01598,GS_10211,GS_15915,GS_23757	4
AgB02	3489310	3507932	AgB02_g200	.	Serine/threonine-protein phosphatase 2B catalytic subunit 2	Y	N	N	N			GS_23757,L3E_01676	2
AgB02	3512646	3513167	AgB02_g201	.	hypothetical protein	Y	Y	Y	N
AgB02	3515129	3517791	AgB02_g202	.	hypothetical protein	Y	Y	Y	N
AgB02	3532399	3540542	AgB02_g203	-	hypothetical protein	N	N	N	N	ASU_05017	1	GS_20365,Liv_02382	2
AgB02	3549815	3550168	AgB02_g204	+	hypothetical protein	Y	Y	Y	N
AgB02	3570173	3577322	AgB02_g205	+	protein phosphatase 1 regulatory subunit 3d	N	N	N	N	ASU_05014,ASU_05015	2	GS_04613,L4_05542	2
AgB02	3574173	3584352	AgB02_g206	-	bestrophin-1	N	N	N	N	ASU_05013,ASU_05014	2	GS_04210,GS_22827,L4_05542	3
AgB02	3600765	3613684	AgB02_g207	-	Methionine aminopeptidase 1	N	N	N	N	ASU_05012	1	GS_14290	1
AgB02	3615599	3637804	AgB02_g208	-	solute carrier family 12 member 2	N	N	N	N	ASU_05011	1	GS_02353,GS_06318,GS_09767,GS_13066,GS_16639,GS_19863	6
AgB02	3648875	3655851	AgB02_g209	+	hematopoietically-expressed homeobox protein hhex	N	N	N	N	ASU_02199	1	GS_19597	1
AgB02	3659011	3683876	AgB02_g210	+	Uncharacterized protein F13C5.5	N	N	N	N	ASU_02198	1	GS_02100,GS_09097,GS_15385,GS_22775,Liv_03653	5
AgB02	3679908	3680661	AgB02_g211	-	Uncharacterized protein F13C5.5	Y	N	N	N			GS_22775	1
AgB02	3686915	3701913	AgB02_g212	-	hypothetical protein	N	N	N	N	ASU_02196,ASU_02197	2	GS_10722,GS_12002,L4_00537	3
AgB02	3694554	3701913	AgB02_g213	+	hypothetical protein	N	N	N	N	ASU_02196	1	GS_10722,GS_12002,L4_00537	3
AgB02	3706598	3726672	AgB02_g214	+	Tat-binding 7	N	N	N	N	ASU_02194	1	GS_05177	1
AgB02	3727342	3727734	AgB02_g215	.	hypothetical protein	Y	Y	Y	N
AgB02	3732239	3738749	AgB02_g216	+	3'(2'),5'-bisphosphate nucleotidase 1	N	N	N	N	ASU_02192,ASU_02193	2	GS_04030,GS_04819,GS_19434,GS_22197	4
AgB02	3741383	3753398	AgB02_g217	-	3 (2) -bisphosphate nucleotidase 1	N	N	N	N	ASU_02191,ASU_02192	2	GS_04030,GS_07698,GS_22197	3
AgB02	3754428	3759026	AgB02_g218	-	hypothetical protein	N	N	N	N	ASU_02190	1	GS_05870	1
AgB02	3770801	3777248	AgB02_g219	+	Organic solute transporter alpha-like protein	N	N	N	N	ASU_02189	1	GS_15656	1
AgB02	3778257	3786921	AgB02_g220	-	Bestrophin-1	N	N	N	N	ASU_02188	1	GS_13658,GS_19057	2
AgB02	3792996	3801810	AgB02_g221	-	hypothetical protein	N	N	N	N	ASU_02187	1	GS_08192	1
AgB02	3804557	3819115	AgB02_g222	+	serine arginine repetitive matrix protein 2	N	N	N	N	ASU_02186	1	GS_02577,GS_21223	2
AgB02	3827144	3837142	AgB02_g223	-	Paired box protein Pax-6	N	N	N	N	ASU_02184,ASU_02185	2	GS_02791,GS_19046	2
AgB02	3846273	3847324	AgB02_g224	+	hypothetical protein	N	N	N	N	ASU_02183	1	GS_07644	1
AgB02	3848365	3853586	AgB02_g225	+	lipase	N	N	N	N	ASU_02182	1	GS_00682	1
AgB02	3855123	3855581	AgB02_g226	.	hypothetical protein	Y	Y	Y	N
AgB02	3859660	3861649	AgB02_g227	+	lipase	N	N	N	N	ASU_02181	1	GS_09084	1
AgB02	3863912	3868057	AgB02_g228	+	leucine-rich repeat neuronal protein 1	N	N	N	N	ASU_02179	1	GS_00610,GS_19602	2
AgB02	3869448	3870586	AgB02_g229	-	hypothetical protein	Y	Y	Y	N
AgB02	3881547	3894152	AgB02_g230	+	Carboxypeptidase N subunit 2	N	N	N	N	ASU_02177,ASU_02178	2	GS_06072,GS_11380	2
AgB02	3910658	3913208	AgB02_g231	+	deoxyribonuclease-2	Y	N	N	N			GS_23673	1
AgB02	3913892	3917924	AgB02_g232	+	Cell-death-related nuclease 7	N	N	N	N	ASU_02176	1	GS_05593	1
AgB02	3930042	3934993	AgB02_g233	+	hypothetical protein	N	N	N	N	ASU_02175	1	GS_16563	1
AgB02	3945303	3969007	AgB02_g234	+	Transcription factor IIIB 90 kDa subunit	N	N	N	N	ASU_02174	1	GS_08474	1
AgB02	3973132	3980469	AgB02_g235	+	Tubulin beta-2 chain, partial	N	N	N	N	ASU_02173	1	GS_23993	1
AgB02	3986276	3992546	AgB02_g236	+	SOSS complex subunit B1	N	N	N	N	ASU_02172	1	GS_15622	1
AgB02	3997881	4018309	AgB02_g237	+	VWFA and cache domain-containing protein 1	N	N	N	N	ASU_02171	1	GS_04394,GS_04578,GS_09765,GS_10157,GS_18036,GS_22150	6
AgB02	4023299	4023781	AgB02_g238	.	hypothetical protein	Y	Y	Y	N
AgB02	4031051	4032286	AgB02_g239	+	1,2-dihydroxy-3-keto-5-methylthiopentene dioxygenase	Y	Y	Y	N
AgB02	4048222	4072851	AgB02_g240	+	isocitrate dehydrogenase subunit gamma	N	N	N	N	ASU_02167,ASU_02168,ASU_02169	3	GS_05970,GS_09027,GS_23948	3
AgB02	4051980	4062331	AgB02_g241	+	Isocitrate dehydrogenase NAD subunit gamma 1	N	N	N	N	ASU_02167	1	GS_09027,GS_22126	2
AgB02	4074453	4078057	AgB02_g242	+	Ovochymase-1	N	N	N	N	ASU_02166	1	GS_08158,GS_10997	2
AgB02	4085113	4090339	AgB02_g243	-	hypothetical protein	Y	Y	Y	N
AgB02	4118682	4163253	AgB02_g244	+	Roundabout 2, partial	N	N	N	N	ASU_02164,ASU_02165	2	GS_12577	1
AgB02	4165179	4171380	AgB02_g245	+	hypothetical protein	N	N	N	N	ASU_02163	1	GS_09213,GS_15135	2
AgB02	4185711	4195410	AgB02_g246	-	zinc finger protein	N	N	N	N	ASU_07128	1	GS_16388	1
AgB02	4197948	4199525	AgB02_g247	-	Histone-lysine N-methyltransferase SUV420H2	Y	Y	Y	N
AgB02	4205503	4215351	AgB02_g248	-	Histone-lysine N-methyltransferase SUV420H2	Y	N	N	N			GS_02289	1
AgB02	4222489	4251289	AgB02_g249	-	Histone-lysine N-methyltransferase Mes-4	N	N	N	N	ASU_07127	1	GS_12649	1
AgB02	4263594	4273279	AgB02_g250	+	50s ribosomal protein l10	N	N	N	N	ASU_07126	1	GS_00611	1
AgB02	4283289	4290482	AgB02_g251	-	Deoxyhypusine hydroxylase	N	N	N	N	ASU_07123,ASU_07124,ASU_07125	3	GS_07124,GS_13846,GS_18927	3
AgB02	4337638	4339969	AgB02_g252	-	50s ribosomal protein l10	Y	N	N	N			GS_15321,L4_03027	2
AgB02	4350402	4359427	AgB02_g253	+	Methyltransferase Y17G7B.18	N	N	N	N	ASU_07121	1	GS_16907,L3E_00242	2
AgB02	4365873	4371229	AgB02_g254	+	hypothetical protein	N	N	N	N	ASU_07120	1	GS_19319	1
AgB02	4384741	4397182	AgB02_g255	-	hypothetical protein	N	N	N	N	ASU_07119	1	GS_01381,GS_11771	2
AgB02	4401638	4406284	AgB02_g256	.	Putative RNA-directed DNA polymerase from transposon X-element	Y	Y	Y	N
AgB02	4414571	4434085	AgB02_g257	+	hypothetical protein	N	N	N	N	ASU_07118	1	GS_11165,GS_16635,GS_22082	3
AgB02	4446082	4471257	AgB02_g258	+	Cadherin-87A	N	N	N	N	ASU_07117	1	GS_06010,GS_08851,GS_09656,GS_16427,GS_23594	5
AgB02	4487343	4488052	AgB02_g259	-	hypothetical protein	Y	Y	Y	N
AgB02	4491268	4495275	AgB02_g260	-	hypothetical protein	N	N	N	N	ASU_05710	1	GS_05187	1
AgB02	4507706	4512799	AgB02_g261	+	cre-egl-26 protein	N	N	N	N	ASU_05711	1	GS_14441	1
AgB02	4516328	4520913	AgB02_g262	+	Deoxyribonuclease TATDN3	N	N	N	N	ASU_05712	1	GS_19761	1
AgB02	4536373	4548616	AgB02_g263	+	patched domain-containing protein 3	N	N	N	N	ASU_05713,ASU_05714	2	GS_00588,GS_04826	2
AgB02	4559267	4582017	AgB02_g264	-	Protein melted	N	N	N	N	ASU_05715	1	GS_11364	1
AgB02	4615483	4636425	AgB02_g265	-	Pleckstriny domain-containing family M member 3	N	N	N	N	ASU_05716	1	GS_01024,GS_05786	2
AgB02	4647260	4665298	AgB02_g266	+	Palmitoyltransferase	N	N	N	N	ASU_05717,ASU_05718,ASU_05719,ASU_05720	4	GS_03295,GS_09731,L4_01464	3
AgB02	4648165	4664870	AgB02_g267	-	hypothetical protein	N	N	N	N	ASU_05717,ASU_05718,ASU_05719,ASU_05720	4	GS_03295,GS_09731,L4_01464	3
AgB02	4675412	4677571	AgB02_g268	+	hypothetical protein	Y	Y	Y	N
AgB02	4685191	4719087	AgB02_g269	+	FCH domain only protein 2	N	N	N	N	ASU_05721	1	GS_10958	1
AgB02	4720918	4727683	AgB02_g270	+	hypothetical protein	Y	N	N	N			GS_09158	1
AgB02	4725113	4731748	AgB02_g271	-	hypothetical protein	N	N	N	N	ASU_05722	1	GS_09158	1
AgB02	4754781	4758198	AgB02_g272	+	hypothetical protein	N	N	N	N	ASU_05724	1	L3E_00171	1
AgB02	4760753	4769927	AgB02_g273	-	hypothetical protein	N	N	N	N	ASU_05725	1	GS_01951	1
AgB02	4771943	4772661	AgB02_g274	-	g in family member (glb-14)	N	N	N	N	ASU_05726	1	GS_14773	1
AgB02	4782756	4803636	AgB02_g275	+	putative v-type proton atpase subunit a	N	N	N	N	ASU_05727	1	GS_15347	1
AgB02	4801228	4830820	AgB02_g276	-	Serine/threonine-protein kinase PAK 3	N	N	N	N	ASU_05728	1	GS_03842,GS_20948	2
AgB02	4834285	4834587	AgB02_g277	-	Transposon-derived protein, partial	Y	Y	Y	N
AgB02	4852474	4868662	AgB02_g278	-	ubiquitin carboxyl-terminal hydrolase 7	N	N	N	Y	ASU_05729	1	GS_01737,GS_10678,GS_15736	3
AgB02	4872672	4877392	AgB02_g279	+	Small ubiquitin-related modifier	N	N	N	Y	ASU_11804	1	GS_17491	1
AgB02	4865604	4866124	AgB02_g280	.	hypothetical protein	Y	Y	Y	Y
AgB02	4867217	4867572	AgB02_g281	.	hypothetical protein	Y	Y	Y	Y
AgB02	4877624	4878428	AgB02_g282	.	hypothetical protein	Y	Y	Y	Y
AgB02	4878579	4879209	AgB02_g283	.	hypothetical protein	Y	Y	Y	Y
AgB02	4896650	4901515	AgB02_g284	-	hypothetical protein	Y	Y	Y	Y
AgB02	4903207	4921642	AgB02_g285	-	eukaryotic translation initiation factor 3 subunit b	N	N	N	Y	ASU_14992	1	GS_10164,GS_12388	2
AgB02	4905016	4926669	AgB02_g286	+	Eukaryotic translation initiation factor 3 subunit B	N	N	N	Y	ASU_08331,ASU_14992,ASU_14993	3	GS_02342,GS_10164,GS_12388,GS_21315	4
AgB02	4929152	4929792	AgB02_g287	.	hypothetical protein	Y	Y	Y	N
AgB02	4937592	4948308	AgB02_g288	-	Annexin-B11	N	N	N	N	ASU_08332	1	GS_05088	1
AgB02	4954221	4961242	AgB02_g289	+	hypothetical protein	N	N	N	N	ASU_08333	1	GS_15422	1
AgB02	4961869	4962207	AgB02_g290	.	hypothetical protein	Y	Y	Y	N
AgB02	4970561	4987230	AgB02_g291	+	hypothetical protein	N	N	N	N	ASU_08334	1	GS_06692,GS_19925,Liv_00460	3
AgB02	4989521	4992923	AgB02_g292	+	hypothetical protein	N	N	N	N	ASU_08337	1	GS_11537	1
AgB02	4993236	5000323	AgB02_g293	-	Import receptor subunit TOM20	N	N	N	N	ASU_08338	1	GS_20339	1
AgB02	5009139	5017733	AgB02_g294	-	hypothetical protein	N	N	N	N	ASU_08339	1	GS_05488	1
AgB02	5039933	5059426	AgB02_g295	-	hypothetical protein	N	N	N	N	ASU_08340	1	GS_24149	1
AgB02	5063588	5075516	AgB02_g296	-	arylsulfatase	N	N	N	N	ASU_08341	1	GS_11715	1
AgB02	5094689	5099832	AgB02_g297	+	hypothetical protein	N	N	N	N	ASU_08342	1	GS_05652,GS_21619	2
AgB02	5106362	5108399	AgB02_g298	.	hypothetical protein	Y	Y	Y	N
AgB02	5110925	5113786	AgB02_g299	-	hypothetical protein	N	N	N	N	ASU_08343	1	GS_03435	1
AgB02	5116350	5116967	AgB02_g300	.	hypothetical protein	Y	Y	Y	N
AgB02	5127856	5136019	AgB02_g301	+	protein cnppd1	N	N	N	N	ASU_08344	1	GS_11655	1
AgB02	5125736	5127569	AgB02_g302	-	hypothetical protein	Y	Y	Y	N
AgB02	5173401	5178532	AgB02_g303	+	Dimethylaniline monooxygenase N-oxide-forming 5	N	N	N	N	ASU_08345	1	GS_00191,GS_17787	2
AgB02	5156938	5161878	AgB02_g304	-	Dimethylaniline monooxygenase N-oxide-forming 5	Y	Y	Y	N
AgB02	5180706	5183864	AgB02_g305	+	Dimethylaniline monooxygenase N-oxide-forming 5	Y	Y	Y	N
AgB02	5196624	5208264	AgB02_g306	+	Potassium channel subfamily K member 13	Y	N	N	N			GS_03961	1
AgB02	5209141	5219646	AgB02_g307	-	Cyclin-K	N	N	N	N	ASU_13676	1	GS_18977	1
AgB02	5221130	5231315	AgB02_g308	-	Malignant T cell-amplified sequence 1	N	N	N	N	ASU_13677	1	GS_13790	1
AgB02	5250004	5272261	AgB02_g309	+	DDB1- and CUL4-associated factor 5	N	N	N	N	ASU_01330	1	GS_11004	1
AgB02	5295810	5296289	AgB02_g310	.	hypothetical protein	Y	Y	Y	N
AgB02	5311701	5329643	AgB02_g311	+	pyruvate carboxylase 1	N	N	N	N	ASU_01329	1	GS_02250,GS_05417	2
AgB02	5368101	5372532	AgB02_g312	+	Aminopeptidase N	N	N	N	N	ASU_01326,ASU_01328	2	GS_01073,GS_05164,GS_13640,GS_23139	4
AgB02	5360397	5379653	AgB02_g313	-	Protein flp	N	N	N	N	ASU_01327	1	GS_06478	1
AgB02	5374708	5376037	AgB02_g314	.	hypothetical protein	Y	Y	Y	N
AgB02	5389677	5391553	AgB02_g315	-	hypothetical protein	N	Y	N	N	ASU_01324	1
AgB02	5396911	5438076	AgB02_g316	+	cyclin-dependent kinase-like 1	N	N	N	N	ASU_01323	1	GS_00186,GS_19346	2
AgB02	5429645	5469709	AgB02_g317	-	serine threonine-protein phosphatase 5	N	Y	N	N	ASU_01321	1
AgB02	5438987	5447216	AgB02_g318	+	cre-galt-1 protein	N	N	N	N	ASU_01322	1	GS_19858	1
AgB02	5475257	5478896	AgB02_g319	+	UPF0692 protein C19orf54 homolog	N	N	N	N	ASU_01320	1	GS_17973	1
AgB02	5479006	5489583	AgB02_g320	-	hypothetical protein	N	N	N	N	ASU_01319	1	GS_04316	1
AgB02	5495795	5501968	AgB02_g321	+	protein spec3	N	N	N	N	ASU_01318,ASU_01319	2	GS_04316,GS_06723	2
AgB02	5506441	5512702	AgB02_g322	-	brct domain-containing protein	N	N	N	N	ASU_01316	1	GS_02239,GS_08544	2
AgB02	5514563	5524434	AgB02_g323	-	Clathrin light chain	N	N	N	N	ASU_01315	1	GS_18634	1
AgB02	5527817	5541627	AgB02_g324	+	spartin	N	N	N	N	ASU_01314,ASU_15420	2	GS_01003,GS_14664	2
AgB02	5525359	5532198	AgB02_g325	-	spartin	N	N	N	N	ASU_01310,ASU_01312,ASU_01313,ASU_01314,ASU_15420	5	GS_01003,GS_06108,GS_14664,GS_16698	4
AgB02	5548951	5550056	AgB02_g326	-	Peptidoglycan O-acetyltransferase yrhL, partial	N	Y	N	N	ASU_01312	1
AgB02	5565310	5568263	AgB02_g327	.	O-acetyltransferase oatA	Y	N	N	N			GS_06108	1
AgB02	5584173	5594078	AgB02_g328	+	O-acetyltransferase oatA	N	N	N	N	ASU_01309	1	GS_04694,GS_11574,GS_17457	3
AgB02	5597102	5612725	AgB02_g329	-	Spartin	N	N	N	N	ASU_01308	1	GS_01719	1
AgB02	5626957	5637398	AgB02_g330	+	Neutral alpha-glucosidase AB	N	N	N	N	ASU_01307	1	GS_18807	1
AgB02	5639324	5645636	AgB02_g331	+	Histone H3.2	N	N	N	N	ASU_01306	1	GS_00372	1
AgB02	5650494	5658373	AgB02_g332	+	retinol dehydrogenase 12	N	N	N	N	ASU_01305	1	GS_19299	1
AgB02	5654173	5673375	AgB02_g333	-	retinol dehydrogenase 12	N	N	N	N	ASU_01304,ASU_01305	2	GS_19299	1
AgB02	5679343	5682820	AgB02_g334	-	Disheveled-associated activator of morphogenesis 1, partial	Y	N	N	N			GS_03789	1
AgB02	5684165	5701855	AgB02_g335	-	Disheveled-associated activator of morphogenesis 1, partial	N	N	N	N	ASU_01303	1	GS_11916,GS_11926	2
AgB02	5720464	5733224	AgB02_g336	-	Poly(ADP-ribose) polymerase pme-1	Y	N	N	N			GS_13226,GS_17282	2
AgB02	5739138	5744668	AgB02_g337	-	Poly(ADP-ribose) polymerase pme-1	Y	N	N	N			GS_13226,GS_15497	2
AgB02	5745798	5747703	AgB02_g338	+	wd repeat and hmg-box dna-binding protein 1	Y	Y	Y	N
AgB02	5749692	5768076	AgB02_g339	+	wd repeat and hmg-box dna-binding protein 1	N	N	N	N	ASU_01301	1	GS_05567,GS_05991,GS_18746	3
AgB02	5781079	5789002	AgB02_g340	+	cre-hot-6 protein	N	N	N	N	ASU_11744	1	GS_10817,GS_16311	2
AgB02	5796705	5808302	AgB02_g341	-	ornithine decarboxylase	N	N	N	N	ASU_11745	1	GS_06782	1
AgB02	5812013	5821629	AgB02_g342	+	39s ribosomal protein	N	N	N	N	ASU_11746	1	GS_21670	1
AgB02	5825059	5834951	AgB02_g343	+	Chondroitin proteoglycan 4	N	N	N	N	ASU_11747	1	GS_08135	1
AgB02	5844171	5849111	AgB02_g344	+	bardet-biedl syndrome 2 protein-like protein	N	N	N	N	ASU_11748,ASU_11749,ASU_11750	3	GS_03099,GS_08135	2
AgB02	5867534	5873560	AgB02_g345	-	hypothetical protein	N	N	N	N	ASU_11751,ASU_11752	2	GS_01932,GS_20792	2
AgB02	5853101	5859064	AgB02_g346	+	Testican-3	N	N	N	N	ASU_11751	1	GS_20792	1
AgB02	5865950	5867062	AgB02_g347	.	Testican-3	Y	Y	Y	N
AgB02	5876988	5879576	AgB02_g348	-	hypothetical protein	Y	Y	Y	N
AgB02	5891019	5909635	AgB02_g349	-	Ankyrin repeat domain-containing protein 40	N	N	N	N	ASU_13600	1	GS_16654	1
AgB02	5885463	5889332	AgB02_g350	+	hypothetical protein	N	Y	N	N	ASU_13601	1
AgB02	5924899	5941287	AgB02_g351	+	Phospholipase B1, membrane-associated	N	N	N	N	ASU_13714	1	GS_22450	1
AgB02	5940673	5950243	AgB02_g352	-	Fatty acid-binding protein 9	Y	N	N	N			GS_10068	1
AgB02	5950484	5954251	AgB02_g353	-	Pyruvate dehydrogenase E1 component subunit beta	Y	N	N	N			GS_19499	1
AgB02	5956567	5965408	AgB02_g354	+	hypothetical protein	Y	N	N	N			GS_04828	1
AgB02	5965578	5975291	AgB02_g355	-	cre-mltn-9 protein	N	N	N	N	ASU_12817,ASU_12818	2	GS_00509,GS_05865,GS_24042	3
AgB02	5989276	6004392	AgB02_g356	-	f-box only protein 11	N	N	N	N	ASU_12819	1	GS_05140	1
AgB02	6028047	6039359	AgB02_g357	+	glioma tumor suppressor protein	N	N	N	N	ASU_12820	1	GS_07425,GS_15979	2
AgB02	6054352	6058963	AgB02_g358	+	Protein giant	Y	N	N	N			GS_09262,GS_20472	2
AgB02	6074648	6102137	AgB02_g359	+	Fasciculation and elongation protein zeta-2	N	N	N	N	ASU_05324	1	GS_15302	1
AgB02	6102215	6110720	AgB02_g360	-	O-sialoglycoprotein endopeptidase 2	N	N	N	N	ASU_05323	1	GS_20662	1
AgB02	6111946	6117656	AgB02_g361	+	serine arginine-rich splicing factor 4	N	N	N	N	ASU_05322	1	GS_15286	1
AgB02	6125105	6179177	AgB02_g362	-	Uncharacterized protein ZC412.3	N	N	N	N	ASU_05321	1	GS_01811,GS_07121	2
AgB02	6142982	6208403	AgB02_g363	+	Dynein heavy chain-like protein	N	N	N	N	ASU_05319	1	GS_03061	1
AgB02	6213185	6217995	AgB02_g364	-	LINE-1 reverse transcriptase	Y	Y	Y	N
AgB02	6228852	6255824	AgB02_g365	+	putative phospholipase d	N	N	N	N	ASU_06482	1	GS_11562	1
AgB02	6261355	6281908	AgB02_g366	-	Peroxidasin	N	N	N	N	ASU_06483	1	GS_18246	1
AgB02	6287602	6293543	AgB02_g367	-	hypothetical protein	N	Y	N	N	ASU_06484	1
AgB02	6295445	6309338	AgB02_g368	+	pinin sdk mema protein conserved region containing protein	N	N	N	N	ASU_06485	1	GS_22177	1
AgB02	6307517	6323400	AgB02_g369	-	Potassium voltage-gated channel protein Shaw	N	N	N	N	ASU_06486	1	GS_04817,GS_14482	2
AgB02	6318438	6318846	AgB02_g370	.	Potassium voltage-gated channel protein Shaw	Y	Y	Y	N
AgB02	6331080	6335863	AgB02_g371	+	potassium voltage-gated channel protein shaw	Y	Y	Y	N
AgB02	6337709	6379269	AgB02_g372	-	potassium voltage-gated channel protein shaw	Y	Y	Y	N
AgB02	6389822	6396880	AgB02_g373	+	hypothetical protein	N	N	N	N	ASU_10496	1	GS_09104	1
AgB02	6403743	6424766	AgB02_g374	+	hypothetical protein	N	N	N	N	ASU_10495	1	GS_10213,GS_15659	2
AgB02	6413948	6417973	AgB02_g375	-	hypothetical protein	Y	N	N	N			GS_15659	1
AgB02	6426411	6431686	AgB02_g376	+	hypothetical protein	Y	N	N	N			GS_10213	1
AgB02	6428194	6445065	AgB02_g377	-	hypothetical protein	N	Y	N	N	ASU_10494	1
AgB02	6447309	6451149	AgB02_g378	-	phosphomevalonate kinase	N	N	N	N	ASU_10493	1	GS_08897	1
AgB02	6452249	6457020	AgB02_g379	-	Protein transport protein Sec61 subunit gamma	N	N	N	N	ASU_10492	1	GS_03484	1
AgB02	6466710	6472940	AgB02_g380	+	zinc finger protein	N	N	N	N	ASU_10491	1	GS_11630	1
AgB02	6480896	6485692	AgB02_g381	+	intron-binding protein aquarius	N	N	N	N	ASU_10490	1	GS_15600	1
AgB02	6482793	6518775	AgB02_g382	-	intron-binding protein aquarius	N	N	N	N	ASU_10489,ASU_10490	2	GS_04183,GS_15600	2
AgB02	6520361	6532579	AgB02_g383	+	Ankyrin repeat and SOCS box protein 3	N	N	N	N	ASU_10488	1	GS_02256	1
AgB02	6533031	6555154	AgB02_g384	+	tpr domain containing protein	N	N	N	N	ASU_10487,ASU_11943	2	GS_09219,GS_21409	2
AgB02	6557355	6579567	AgB02_g385	+	Metalloproteinase inhibitor tag-225	N	N	N	N	ASU_11944,ASU_11945	2	GS_01457,GS_21732	2
AgB02	6581591	6582872	AgB02_g386	+	Onchocystatin	N	Y	N	N	ASU_11946	1
AgB02	6583531	6586828	AgB02_g387	+	Onchocystatin	N	Y	N	N	ASU_11946	1
AgB02	6594309	6609559	AgB02_g388	+	Cathepsin L, partial	N	N	N	N	ASU_14587	1	GS_10867	1
AgB02	6604161	6609559	AgB02_g389	-	Cathepsin L, partial	Y	Y	Y	N
AgB02	6618169	6619476	AgB02_g390	.	hypothetical protein	Y	N	N	N			GS_10846	1
AgB02	6618195	6623694	AgB02_g391	-	hypothetical protein	N	N	N	N	ASU_14588	1	GS_10846	1
AgB02	6631455	6631943	AgB02_g392	.	hypothetical protein	Y	Y	Y	N
AgB02	6642762	6649955	AgB02_g393	+	hypothetical protein	N	Y	N	N	ASU_13232	1
AgB02	6659666	6660070	AgB02_g394	.	hypothetical protein	Y	Y	Y	N
AgB02	6667731	6670786	AgB02_g395	-	hypothetical protein	Y	Y	Y	N
AgB02	6682156	6682571	AgB02_g396	+	hypothetical protein	Y	Y	Y	N
AgB02	6687475	6707719	AgB02_g397	+	Tissue factor pathway inhibitor	N	N	N	N	ASU_14295,ASU_14296	2	GS_11258,GS_15287	2
AgB02	6732196	6734774	AgB02_g398	+	cytochrome p450 4c1	N	N	N	N	ASU_14294	1	GS_13198	1
AgB02	6733219	6747269	AgB02_g399	-	Cytochrome P450 4V2, partial	N	N	N	N	ASU_12704,ASU_14294	2	GS_00078,GS_13198	2
AgB02	6750771	6774028	AgB02_g400	-	Protein PER1	N	N	N	N	ASU_12092,ASU_12093	2	GS_18244,GS_20669	2
AgB02	6777259	6787433	AgB02_g401	-	hypothetical protein	N	N	N	N	ASU_12094	1	GS_03511,GS_07028	2
AgB02	6799712	6811463	AgB02_g402	+	Cuticle collagen 10	N	N	N	N	ASU_12096	1	GS_10172,GS_20140	2
AgB02	6794747	6798927	AgB02_g403	-	hypothetical protein	N	N	N	N	ASU_12097	1	GS_20140,GS_24298	2
AgB02	6800271	6813254	AgB02_g404	-	Cuticle collagen 10	N	N	N	N	ASU_12096	1	GS_10172	1
AgB02	6821059	6823503	AgB02_g405	+	ATP synthase subunit O, partial	Y	Y	Y	N
AgB02	6825477	6843440	AgB02_g406	+	Argonaute ALG-new3, partial	Y	Y	Y	N
AgB02	6840875	6852434	AgB02_g407	-	UPF0046 protein C25E10.12	N	N	N	N	ASU_12100	1	GS_16548	1
AgB02	6844232	6848924	AgB02_g408	+	UPF0046 protein C25E10.12	Y	Y	Y	N
AgB02	6853252	6859244	AgB02_g409	-	Zinc finger CCHC domain-containing protein 9	N	N	N	N	ASU_11240,ASU_12101	2	GS_21658	1
AgB02	6862090	6871391	AgB02_g410	-	non-muscle myosin family member (nmy-2)	N	N	N	N	ASU_11239	1	GS_05422,GS_10843	2
AgB02	6872712	6889719	AgB02_g411	-	protein tapt1-like protein	N	N	N	N	ASU_11238	1	GS_10295,GS_11703,GS_16895	3
AgB02	6891292	6893108	AgB02_g412	.	hypothetical protein	Y	N	N	N			GS_10295	1
AgB02	6898388	6900960	AgB02_g413	-	hypothetical protein	N	N	N	N	ASU_11237	1	GS_04505	1
AgB02	6917657	6925769	AgB02_g414	-	hypothetical protein	N	N	N	N	ASU_11236	1	GS_09824	1
AgB02	6931567	6935624	AgB02_g415	-	hypothetical protein	N	N	N	N	ASU_10693	1	GS_20212	1
AgB02	6936761	6937683	AgB02_g416	+	hypothetical protein	Y	N	N	N			GS_12721	1
AgB02	6944272	6956013	AgB02_g417	-	protein phosphatase 1b	N	N	N	N	ASU_10694	1	GS_10466	1
AgB02	6961484	6977932	AgB02_g418	-	Integrator complex subunit 3	N	N	N	N	ASU_10695	1	GS_02235,GS_17399	2
AgB02	6980219	6985288	AgB02_g419	-	Integrator complex subunit 3	N	N	N	N	ASU_10695	1	GS_12236,GS_19041	2
AgB02	6995195	7000633	AgB02_g420	+	Calpain-D	N	N	N	N	ASU_12334	1	GS_03352,GS_16375	2
AgB02	7052496	7061478	AgB02_g421	+	prohormone-4	Y	N	N	N			GS_05510	1
AgB02	7070404	7070703	AgB02_g422	.	ligand-gated ion channel 50	Y	Y	Y	N
AgB02	7071950	7075136	AgB02_g423	-	ligand-gated ion channel 50	N	N	N	N	ASU_12331	1	GS_05162	1
AgB02	7101984	7109161	AgB02_g424	-	hypothetical protein	N	Y	N	N	ASU_12329	1
AgB02	7112126	7113358	AgB02_g425	.	hypothetical protein	Y	Y	Y	N
AgB02	7126874	7132281	AgB02_g426	+	kinase d-interacting substrate	N	N	N	N	ASU_00165	1	GS_02639	1
AgB02	7166791	7169761	AgB02_g427	+	cuticle collagen 10	N	N	N	N	ASU_00164	1	GS_03152	1
AgB02	7171848	7175413	AgB02_g428	+	db module family protein	Y	Y	Y	N
AgB02	7178277	7191647	AgB02_g429	-	c-type lectin protein	N	N	N	N	ASU_00163	1	GS_14970,GS_17565	2
AgB02	7221735	7233305	AgB02_g430	+	Doublesex- and mab-3-related transcription factor A2, partial	N	N	N	N	ASU_14738,ASU_14739	2	GS_08420,GS_13985	2
AgB02	7227257	7234569	AgB02_g431	-	hypothetical protein	N	N	N	N	ASU_14739	1	GS_13985	1
AgB02	7273721	7286495	AgB02_g432	+	Heat shock 70 kDa protein F	N	N	N	N	ASU_12775	1	GS_20227	1
AgB02	7310048	7322933	AgB02_g433	-	GTP cyclohydrolase 1	N	N	N	N	ASU_12774	1	GS_00469,GS_23557	2
AgB02	7291862	7294293	AgB02_g434	.	GTP cyclohydrolase 1	Y	N	N	N			GS_23557	1
AgB02	7330891	7341247	AgB02_g435	-	hypothetical protein	N	Y	N	N	ASU_12773	1
AgB02	7392288	7412455	AgB02_g436	+	E3 ubiquitin-protein ligase ARIH2	N	N	N	N	ASU_08705	1	GS_13397	1
AgB02	7414004	7426450	AgB02_g437	-	Spectrin beta chain	Y	N	N	N			GS_14227	1
AgB02	7427159	7476024	AgB02_g438	-	Spectrin beta chain	N	N	N	N	ASU_08704	1	GS_14227	1
AgB02	7478398	7480659	AgB02_g439	-	Spectrin beta chain	Y	Y	Y	N
AgB02	7486654	7511833	AgB02_g440	-	Spectrin beta chain	N	Y	N	N	ASU_08703	1
AgB02	7531713	7539968	AgB02_g441	-	Parafibromin	N	N	N	N	ASU_08702	1	GS_02309	1
AgB02	7559132	7576367	AgB02_g442	-	ATP-dependent RNA helicase DDX4	N	N	N	N	ASU_08701	1	GS_07485,GS_09945,GS_15574,GS_23742	4
AgB02	7583411	7593491	AgB02_g443	-	28S ribosomal protein S35	N	N	N	N	ASU_08700	1	GS_12986	1
AgB02	7598898	7616081	AgB02_g444	+	glucose dehydrogenase	N	N	N	N	ASU_08697,ASU_08698,ASU_08699	3	GS_08524,GS_21565	2
AgB02	7608595	7620542	AgB02_g445	-	Heterogeneous nuclear ribonucleoprotein K	N	N	N	N	ASU_08697,ASU_08698	2	GS_03523,GS_15148,GS_21565	3
AgB02	7623094	7627939	AgB02_g446	-	hypothetical protein	N	Y	N	N	ASU_08614	1
AgB02	7634905	7641924	AgB02_g447	+	hypothetical protein	Y	N	N	N			GS_03742,GS_10782	2
AgB02	7648694	7658106	AgB02_g448	-	hypothetical protein	N	N	N	N	ASU_08616	1	GS_05629	1
AgB02	7661546	7673275	AgB02_g449	+	hypothetical protein	N	N	N	N	ASU_08617	1	GS_18071,GS_18914	2
AgB02	7674243	7694743	AgB02_g450	-	polyprotein aba-1	N	N	N	N	ASU_08618	1	GS_01050	1
AgB02	7696263	7721252	AgB02_g451	-	Polyprotein ABA-1	N	N	N	N	ASU_06066,ASU_08619	2	GS_20234	1
AgB02	7701356	7703420	AgB02_g452	+	polyprotein allergen/antigen, partial	N	N	N	N	ASU_08619	1	GS_20234	1
AgB02	7732982	7746108	AgB02_g453	-	hypothetical protein	N	N	N	N	ASU_06064,ASU_06065	2	GS_24080,Lung_01110	2
AgB02	7746929	7769315	AgB02_g454	+	Early endosome antigen 1	N	N	N	N	ASU_06062,ASU_06063	2	GS_12995	1
AgB02	7794816	7830662	AgB02_g455	+	Phosphofurin acidic cluster sorting protein 2	N	N	N	N	ASU_06061	1	GS_02231,L4_01470	2
AgB02	7786203	7786550	AgB02_g456	+	early endosome antigen 1	Y	Y	Y	N
AgB02	7835977	7871348	AgB02_g457	+	Transforming acidic coiled-coil-containing protein 3	N	N	N	N	ASU_06060	1	GS_03635	1
AgB02	7870749	7881012	AgB02_g458	+	hypothetical protein	N	N	N	N	ASU_06059	1	GS_05216	1
AgB02	7884021	7887662	AgB02_g459	+	Deoxyribonuclease tatD	N	N	N	N	ASU_06058	1	GS_24333	1
AgB02	7898268	7919527	AgB02_g460	+	hypothetical protein	N	N	N	N	ASU_06057	1	GS_06899,GS_13768	2
AgB02	7924141	7938065	AgB02_g461	+	GTP-binding protein 6	N	N	N	N	ASU_06056	1	GS_01698	1
AgB02	7939843	7947090	AgB02_g462	+	UPF0587 protein F46B6.12	N	N	N	N	ASU_06055	1	GS_20376	1
AgB02	7950342	7957103	AgB02_g463	-	Insulinoma-associated protein 2	N	N	N	N	ASU_06054	1	GS_15816	1
AgB02	7951346	7952409	AgB02_g464	+	Insulinoma-associated protein 2	Y	Y	Y	N
AgB02	7988991	7993820	AgB02_g465	+	hypothetical protein	N	Y	N	N	ASU_06053	1
AgB02	7995759	8003384	AgB02_g466	-	pre-mrna-splicing factor isy1-like protein	N	N	N	N	ASU_06052	1	GS_02301	1
AgB02	8000121	8000644	AgB02_g467	.	pre-mrna-splicing factor isy1-like protein	Y	Y	Y	N
AgB02	8003729	8012547	AgB02_g468	-	histone-binding protein rbbp7	N	N	N	N	ASU_06051	1	GS_07238	1
AgB02	8012777	8026812	AgB02_g469	+	histone deacetylase 11	N	N	N	N	ASU_06050	1	GS_18753	1
AgB02	8016770	8064267	AgB02_g470	-	EH domain-binding protein 1	N	N	N	N	ASU_06049,ASU_06050	2	GS_03831,GS_18753	2
AgB02	8062186	8078849	AgB02_g471	+	Methylmalonyl-CoA mutase	N	N	N	Y	ASU_06048	1	GS_14525	1
AgB02	8083068	8089112	AgB02_g472	+	Solute carrier family 2, partial	N	N	N	Y	ASU_06047	1	GS_13944	1
AgB02	8084986	8094341	AgB02_g473	-	Solute carrier family 2	N	N	N	Y	ASU_06046	1	GS_13944	1
AgB02	8116895	8117361	AgB02_g474	.	hypothetical protein	Y	Y	Y	Y
AgB02	8121690	8131282	AgB02_g475	-	glutamyl-trna amidotransferase subunit b	Y	Y	Y	Y
AgB02	8132306	8134195	AgB02_g476	-	tRNA-dihydrouridine synthase 2-like protein	Y	Y	Y	Y
AgB02	8136276	8144085	AgB02_g477	+	glutamyl-trna amidotransferase subunit b	N	Y	N	Y	ASU_15308	1
AgB02	8172273	8183585	AgB02_g478	-	Phosphatidylserine synthase 1	N	Y	N	Y	ASU_15062	1
AgB02	8202036	8202743	AgB02_g479	+	hypothetical protein	Y	Y	Y	Y
AgB02	8203073	8211129	AgB02_g480	+	hypothetical protein	N	N	N	Y	ASU_10927	1	GS_22560	1
AgB02	8229750	8239774	AgB02_g481	+	DEP domain-containing protein 1A	Y	Y	Y	Y
AgB02	8243496	8259679	AgB02_g482	-	DEP domain-containing protein 1A	N	N	N	Y	ASU_11241,ASU_13430	2	GS_02063,GS_19797	2
AgB02	8285179	8287317	AgB02_g483	+	ubiquitin carboxyl-terminal hydrolase 7	N	Y	N	Y	ASU_11887	1
AgB02	8289565	8290481	AgB02_g484	+	Ras-related protein Ral-a	N	N	N	Y	ASU_00455	1	GS_06364	1
AgB02	8292196	8294312	AgB02_g485	-	hypothetical protein	Y	Y	Y	Y
AgB02	8296197	8304167	AgB02_g486	+	kinesin-2	N	N	N	Y	ASU_00454	1	GS_06753	1
AgB02	8308685	8311156	AgB02_g487	+	Tyrosine-protein phosphatase non-receptor type 3	Y	Y	Y	N
AgB02	8315993	8322234	AgB02_g488	-	hypothetical protein	N	Y	N	N	ASU_00453,ASU_04127	2
AgB02	8332970	8338045	AgB02_g489	-	potassium voltage-gated channel protein shaw	N	Y	N	N	ASU_12589	1
AgB02	8357408	8364711	AgB02_g490	-	potassium voltage-gated channel protein shaw	N	Y	N	N	ASU_12590	1
AgB02	8364567	8365738	AgB02_g491	+	Egl nine 1	Y	Y	Y	N
AgB02	8367123	8367272	AgB02_g492	.	potassium voltage-gated channel protein shaw	Y	Y	Y	N
AgB02	8371496	8384771	AgB02_g493	-	potassium voltage-gated channel protein shaw	N	Y	N	N	ASU_12590	1
AgB02	8386284	8389328	AgB02_g494	-	Lysosomal acid phosphatase	Y	Y	Y	N
AgB02	8390526	8391544	AgB02_g495	-	acid phosphatase 10	Y	Y	Y	N
AgB02	8391598	8391963	AgB02_g496	-	hypothetical protein	Y	Y	Y	N
AgB02	8395743	8402442	AgB02_g497	-	acid phosphatase 10	Y	Y	Y	N
AgB02	8434309	8435712	AgB02_g498	.	NADH-ubiquinone oxidoreductase chain 6	Y	Y	Y	N
AgB02	8437501	8437977	AgB02_g499	.	hypothetical protein	Y	Y	Y	N
AgB02	8438499	8439102	AgB02_g500	.	hypothetical protein	Y	Y	Y	N
AgB02	8440638	8445195	AgB02_g501	-	Histone H3.3	N	N	N	N	ASU_10178,ASU_10179,ASU_10180	3	GS_04036	1
AgB02	8448111	8448474	AgB02_g502	.	hypothetical protein	Y	Y	Y	N
AgB02	8485243	8486616	AgB02_g503	+	Sperm-specific class P protein 19	N	N	N	N	ASU_10177	1	GS_05734	1
AgB02	8488070	8488662	AgB02_g504	+	RecName: Full=Major sperm protein isoform alpha; AltName: Full=Alpha-MSP	N	N	N	N	ASU_10176	1	GS_05201	1
AgB02	8489970	8499545	AgB02_g505	-	Uncharacterized protein C14B9.3	N	N	N	N	ASU_10175	1	GS_11108	1
AgB02	8505030	8510146	AgB02_g506	-	dna repair protein rev1	N	N	N	N	ASU_10174	1	GS_18734	1
AgB02	8511612	8517179	AgB02_g507	-	dna repair protein rev1	N	N	N	N	ASU_10174	1	GS_18734	1
AgB02	8521798	8541041	AgB02_g508	-	NADPH--cytochrome P450 reductase	N	N	N	N	ASU_10173	1	GS_02849,GS_08261	2
AgB02	8546944	8564158	AgB02_g509	-	MORC family CW-type zinc finger protein 2A	N	N	N	N	ASU_10171	1	GS_16139,GS_21592	2
AgB02	8564984	8575958	AgB02_g510	-	MORC family CW-type zinc finger protein 2A	N	N	N	N	ASU_10171	1	GS_05643	1
AgB02	8578375	8593931	AgB02_g511	-	SH2B adapter protein 2	N	N	N	N	ASU_10170	1	GS_05722,GS_13496	2
AgB02	8616117	8627236	AgB02_g512	+	hypothetical protein	N	N	N	N	ASU_12348	1	GS_18793	1
AgB02	8636718	8641015	AgB02_g513	-	kringle domain containing protein	N	N	N	N	ASU_12347	1	GS_03051,GS_23493	2
AgB02	8644198	8664118	AgB02_g514	-	Zinc metalloproteinase nas-26	N	N	N	N	ASU_12346	1	GS_06225	1
AgB02	8652092	8653319	AgB02_g515	.	Zinc metalloproteinase nas-26	Y	Y	Y	N
AgB02	8685998	8696817	AgB02_g516	+	Palmitoyltransferase	Y	Y	Y	N
AgB02	8793073	8807033	AgB02_g517	+	Sodium leak channel non-selective protein, partial	N	N	N	N	ASU_14561,ASU_14562	2	GS_12495	1
AgB02	8787775	8788373	AgB02_g518	.	hypothetical protein	Y	Y	Y	N
AgB02	8809455	8821901	AgB02_g519	+	Sodium leak channel non-selective protein	N	Y	N	N	ASU_13700,ASU_13701	2
AgB02	8819613	8826538	AgB02_g520	-	chch domain containing protein	N	N	N	N	ASU_13701	1	GS_23568	1
AgB02	8829072	8835223	AgB02_g521	+	ALK tyrosine kinase receptor	N	N	N	N	ASU_13702	1	GS_01374,GS_06777,GS_23448	3
AgB02	8835640	8840492	AgB02_g522	-	Palmitoyltransferase	N	N	N	N	ASU_13703	1	GS_00694	1
AgB02	8861385	8913318	AgB02_g523	-	Oxysterol-binding protein 2	N	N	N	N	ASU_13704	1	GS_23972	1
AgB02	8922615	8933658	AgB02_g524	-	Hexokinase-2	N	N	N	N	ASU_14714	1	GS_11322	1
AgB02	8935715	8951514	AgB02_g525	+	Transporter	N	N	N	N	ASU_14954,ASU_14955	2	GS_01188,GS_19964	2
AgB02	8946636	8951514	AgB02_g526	-	kinesin motor domain containing protein	N	N	N	N	ASU_14954,ASU_14955	2	GS_19964	1
AgB02	8954396	8971234	AgB02_g527	+	Nose resistant to fluoxetine protein 6	N	N	N	N	ASU_13030,ASU_15131,ASU_15344	3	GS_14744,GS_19930	2
AgB02	8973700	8985077	AgB02_g528	-	COP9 signalosome complex subunit 3	N	N	N	N	ASU_06129	1	GS_04122	1
AgB02	8985398	8998193	AgB02_g529	+	ubx domain-containing protein 4	N	N	N	N	ASU_06128	1	GS_04545,GS_09870	2
AgB02	8999681	9068392	AgB02_g530	+	JNK-interacting protein	N	N	N	N	ASU_12282,ASU_14143,ASU_15398	3	GS_11520,GS_24375	2
AgB02	9070632	9076926	AgB02_g531	-	hypothetical protein	N	N	N	N	ASU_12281	1	GS_07857	1
AgB02	9081845	9082851	AgB02_g532	.	hypothetical protein	Y	Y	Y	N
AgB02	9083939	9102973	AgB02_g533	+	tetraspanin-31-b	N	N	N	N	ASU_12280	1	GS_02982	1
AgB02	9097834	9109007	AgB02_g534	+	Uncharacterized protein C35D10.17	N	N	N	N	ASU_12279	1	GS_08672	1
AgB02	9106760	9111462	AgB02_g535	-	Chondroitin proteoglycan 3	Y	N	N	N			GS_21588	1
AgB02	9113624	9115426	AgB02_g536	-	hypothetical protein	N	N	N	N	ASU_12278	1	GS_03936	1
AgB02	9116500	9121738	AgB02_g537	-	hypothetical protein	N	N	N	N	ASU_12276,ASU_12277	2	GS_06204,GS_06390	2
AgB02	9126372	9152491	AgB02_g538	-	WW domain-containing protein	N	N	N	N	ASU_12274,ASU_15176	2	GS_09615,GS_16466,GS_23398	3
AgB02	9179274	9192323	AgB02_g539	+	hypothetical protein	N	N	N	N	ASU_07346	1	GS_04775,GS_13898	2
AgB02	9200912	9202709	AgB02_g540	+	Gamma-secretase subunit pen-2	N	N	N	N	ASU_07345	1	GS_10602	1
AgB02	9206502	9208732	AgB02_g541	+	transmembrane protein	Y	Y	Y	N
AgB03	18275	27313	AgB03_g001	+	hypothetical protein	N	N	N	Y	ASU_13268	1	GS_00491	1
AgB03	26858	60432	AgB03_g002	-	Condensin complex subunit 3	N	N	N	Y	ASU_13267	1	A38366,A38367,GS_06436	3
AgB03	65411	68027	AgB03_g003	+	hypothetical protein	Y	Y	Y	Y
AgB03	70138	73231	AgB03_g004	-	arylacetamide deacetylase	Y	Y	Y	Y
AgB03	81112	81368	AgB03_g005	.	Uncharacterized protein U88	Y	Y	Y	Y
AgB03	84951	89008	AgB03_g006	+	Arylacetamide deacetylase-like protein	Y	Y	Y	Y
AgB03	95298	153623	AgB03_g007	+	DNA-directed RNA polymerase II subunit RPB1	N	N	N	Y	ASU_08547,ASU_08548	2	GS_14588,GS_15300	2
AgB03	152660	158854	AgB03_g008	-	Major sperm protein	N	N	N	Y	ASU_08548	1	GS_15300	1
AgB03	160713	168862	AgB03_g009	-	hypothetical protein	Y	N	N	Y			GS_18701	1
AgB03	180115	187535	AgB03_g010	-	AarF domain-containing protein kinase 1, partial	N	N	N	N	ASU_08550	1	GS_11968	1
AgB03	190342	201434	AgB03_g011	+	hypothetical protein	N	N	N	N	ASU_08551	1	GS_21995	1
AgB03	204279	210027	AgB03_g012	-	Glutaredoxin 3, partial	N	N	N	N	ASU_08552	1	GS_04703	1
AgB03	213109	253242	AgB03_g013	+	Vacuolar protein sorting-associated protein 54	N	N	N	N	ASU_08554,ASU_08555,ASU_08556	3	GS_03284,GS_13287,GS_14010	3
AgB03	225001	227990	AgB03_g014	-	hypothetical protein	N	N	N	N	ASU_08553	1	L4_02471,L4_03801,L4_04443	3
AgB03	246595	255085	AgB03_g015	-	vacuolar protein sorting-associated protein 54	Y	N	N	N			GS_14010	1
AgB03	276479	296938	AgB03_g016	-	hypothetical protein	N	N	N	N	ASU_08557	1	GS_00688	1
AgB03	315921	316287	AgB03_g017	.	hypothetical protein	Y	Y	Y	N
AgB03	350007	367711	AgB03_g018	+	mrna-capping enzyme	N	N	N	N	ASU_07456	1	GS_21472	1
AgB03	365840	375595	AgB03_g019	-	MRNA-capping enzyme	N	N	N	N	ASU_07457,ASU_07458	2	GS_08961,GS_21854	2
AgB03	443859	447751	AgB03_g020	.	hypothetical protein	Y	Y	Y	N
AgB03	449686	463785	AgB03_g021	-	gut esterase 1	N	N	N	N	ASU_07459	1	GS_05269	1
AgB03	469392	472571	AgB03_g022	-	transient receptor potential cation channel subfamily v member 4	N	N	N	N	ASU_07460	1	GS_18744	1
AgB03	482160	490791	AgB03_g023	-	Transient receptor potential cation channel subfamily V member 6	N	N	N	N	ASU_07461	1	GS_18744	1
AgB03	504847	538912	AgB03_g024	-	gut esterase 1	N	N	N	N	ASU_07462	1	GS_01862	1
AgB03	546190	554913	AgB03_g025	-	cre-clc-1 protein	N	N	N	N	ASU_07463	1	GS_00513	1
AgB03	558535	567021	AgB03_g026	-	Thiosulfate sulfurtransferase	N	N	N	N	ASU_07464	1	GS_09068	1
AgB03	568315	574414	AgB03_g027	-	thiosulfate sulfurtransferase	Y	N	N	N			GS_14594	1
AgB03	586570	594524	AgB03_g028	-	guanine nucleotide-binding protein alpha-1 subunit	N	N	N	N	ASU_07465	1	GS_15380	1
AgB03	603679	604176	AgB03_g029	.	hypothetical protein	Y	Y	Y	N
AgB03	619380	622735	AgB03_g030	+	small heat shock protein ov25-2	N	N	N	N	ASU_07467	1	GS_05819	1
AgB03	629226	632680	AgB03_g031	+	zinc c2h2 type family protein	Y	Y	Y	N
AgB03	635421	639300	AgB03_g032	-	hypothetical protein	Y	Y	Y	N
AgB03	641182	646616	AgB03_g033	-	hypothetical protein	Y	Y	Y	N
AgB03	662516	662848	AgB03_g034	.	hypothetical protein	Y	Y	Y	N
AgB03	676352	684556	AgB03_g035	+	Calmodulin, partial	N	N	N	N	ASU_10655	1	GS_19095	1
AgB03	684997	689476	AgB03_g036	+	Calmodulin, partial	N	N	N	N	ASU_10655	1	GS_19095	1
AgB03	691325	701002	AgB03_g037	-	hypothetical protein	N	N	N	N	ASU_10656	1	GS_10105	1
AgB03	705530	708358	AgB03_g038	-	Recombination repair protein 1	N	N	N	N	ASU_10657	1	GS_06597	1
AgB03	711007	720298	AgB03_g039	+	TBC1 domain family member 9	N	N	N	N	ASU_13734	1	GS_08652	1
AgB03	720774	738129	AgB03_g040	+	TBC1 domain family member 9	N	N	N	N	ASU_13734,ASU_14331	2	GS_08652	1
AgB03	741697	745925	AgB03_g041	-	hypothetical protein	N	Y	N	N	ASU_14332	1
AgB03	755103	757594	AgB03_g042	+	hedgehog-like family member (grd-5)	N	N	N	N	ASU_14333	1	GS_02123	1
AgB03	759515	767787	AgB03_g043	-	hypothetical protein	N	N	N	N	ASU_14334	1	GS_22998	1
AgB03	784528	818957	AgB03_g044	+	hypothetical protein	N	N	N	N	ASU_03769,ASU_14768	2	GS_13391	1
AgB03	820036	822582	AgB03_g045	+	Non-centrosomal microtubule array protein 1	N	Y	N	N	ASU_03769	1
AgB03	838019	846553	AgB03_g046	+	hypothetical protein	N	N	N	N	ASU_03770	1	GS_21080	1
AgB03	849009	856973	AgB03_g047	-	hypothetical protein	N	N	N	N	ASU_03771	1	GS_04012	1
AgB03	864524	874019	AgB03_g048	+	hspb1-associated protein 1-like protein	N	N	N	N	ASU_14101,ASU_14102	2	GS_03348,GS_04012,GS_11317,GS_14409	4
AgB03	875568	881466	AgB03_g049	+	28s ribosomal protein	N	N	N	N	ASU_14103,ASU_14104	2	GS_16856	1
AgB03	877895	887288	AgB03_g050	-	S-adenosylmethionine synthase 3	N	N	N	N	ASU_14103,ASU_14104	2	GS_10144	1
AgB03	881546	887288	AgB03_g051	.	putative s-adenosylmethionine synthase 3	N	Y	N	N	ASU_14104	1
AgB03	890978	898656	AgB03_g052	+	hit zinc finger family protein	N	N	N	N	ASU_14105	1	GS_07571	1
AgB03	898790	904067	AgB03_g053	-	Uncharacterized protein ZC412.3	N	N	N	N	ASU_14106	1	GS_01722	1
AgB03	907239	912414	AgB03_g054	+	hypothetical protein	N	N	N	N	ASU_15385	1	GS_13771	1
AgB03	913553	915267	AgB03_g055	-	hypothetical protein	Y	Y	Y	N
AgB03	922848	927070	AgB03_g056	+	signal transducer and activator of transcription b	N	Y	N	N	ASU_10293	1
AgB03	924928	937345	AgB03_g057	-	signal transducer and activator of transcription b	N	N	N	N	ASU_10293	1	GS_12811	1
AgB03	927173	928466	AgB03_g058	.	signal transducer and activator of transcription b	N	Y	N	N	ASU_10293	1
AgB03	937674	945423	AgB03_g059	-	Sodium/chloride cotransporter 3	N	N	N	N	ASU_11969	1	GS_08629,GS_11498	2
AgB03	946621	952694	AgB03_g060	+	Molybdenum cofactor synthesis protein cinnamon	N	N	N	N	ASU_11968	1	GS_21212	1
AgB03	952277	982050	AgB03_g061	-	Centromere-associated protein E	N	N	N	N	ASU_11967	1	GS_19584	1
AgB03	971991	985680	AgB03_g062	+	hypothetical protein	N	N	N	N	ASU_11966	1	GS_00603,GS_07565	2
AgB03	992761	1003767	AgB03_g063	+	hypothetical protein	N	N	N	N	ASU_15259	1	GS_23786	1
AgB03	1005607	1012091	AgB03_g064	+	hypothetical protein	N	N	N	N	ASU_14628	1	GS_03353	1
AgB03	1010972	1018585	AgB03_g065	-	Stress-induced-phosphoprotein 1	N	N	N	N	ASU_14629	1	GS_01572	1
AgB03	1020176	1028358	AgB03_g066	+	Protein decapentaplegic	N	N	N	N	ASU_14630	1	GS_07604,GS_10305	2
AgB03	1030466	1061590	AgB03_g067	+	Peroxisome assembly factor 2, partial	N	N	N	N	ASU_14009	1	GS_05678,GS_12881,GS_21602	3
AgB03	1074233	1076673	AgB03_g068	+	putative g-protein coupled receptor	Y	Y	Y	N
AgB03	1096039	1101944	AgB03_g069	-	hypothetical protein	Y	N	N	N			GS_22866	1
AgB03	1111854	1122200	AgB03_g070	-	SEC14-like protein 2	Y	N	N	N			GS_20562	1
AgB03	1133716	1141416	AgB03_g071	-	regulator of g-protein signaling rgs-7	Y	N	N	N			GS_14874	1
AgB03	1158847	1163763	AgB03_g072	+	hypothetical protein	N	Y	N	N	ASU_12839	1
AgB03	1169732	1176562	AgB03_g073	+	hypothetical protein	N	N	N	N	ASU_12838	1	GS_04407,GS_09561	2
AgB03	1179488	1183488	AgB03_g074	+	hypothetical protein	N	Y	N	N	ASU_12837	1
AgB03	1186474	1187015	AgB03_g075	.	puff-specific protein bx42	Y	Y	Y	N
AgB03	1188405	1193570	AgB03_g076	-	neuropeptide receptor a8	N	N	N	N	ASU_12834,ASU_12835	2	GS_02860,GS_15519	2
AgB03	1233878	1237639	AgB03_g077	-	hypothetical protein	Y	N	N	N			GS_07734	1
AgB03	1259332	1267321	AgB03_g078	+	lipase family protein	N	N	N	N	ASU_10378	1	GS_18245	1
AgB03	1275570	1283880	AgB03_g079	+	lipase family protein	N	N	N	N	ASU_10377	1	GS_05155	1
AgB03	1294102	1296726	AgB03_g080	+	ABC transporter ATP-binding protein/permease wht-1	Y	Y	Y	N
AgB03	1302436	1307694	AgB03_g081	+	hypothetical protein	Y	Y	Y	N
AgB03	1310916	1328886	AgB03_g082	-	Uncharacterized protein C9orf72	N	N	N	N	ASU_10374	1	GS_13357	1
AgB03	1327736	1334328	AgB03_g083	+	Transmembrane protein	N	N	N	N	ASU_10374	1	GS_19128	1
AgB03	1333501	1339376	AgB03_g084	-	transmembrane protein	N	Y	N	N	ASU_10373	1
AgB03	1340138	1345342	AgB03_g085	+	ubiquitin-related modifier 1-like protein	N	N	N	N	ASU_10372	1	GS_05421,GS_14386	2
AgB03	1345435	1348594	AgB03_g086	+	protein lin-7-like protein c	N	N	N	N	ASU_10371	1	GS_10697	1
AgB03	1353329	1359613	AgB03_g087	+	iron-sulfur cluster assembly 2	N	N	N	N	ASU_10369	1	GS_21573	1
AgB03	1361190	1364318	AgB03_g088	-	hypothetical protein	N	N	N	N	ASU_10368,ASU_14435	2	GS_03120	1
AgB03	1383354	1388672	AgB03_g089	-	hypothetical protein	N	N	N	N	ASU_10366,ASU_10367	2	GS_02011,GS_23232	2
AgB03	1390158	1398015	AgB03_g090	-	Uncharacterized protein C3orf33	N	N	N	N	ASU_10364,ASU_10365	2	GS_11593,GS_16969	2
AgB03	1423122	1429578	AgB03_g091	+	26s proteasome non-atpase regulatory subunit 13	N	N	N	N	ASU_10363	1	GS_02774	1
AgB03	1456745	1503316	AgB03_g092	+	cre-atf-2 protein	N	N	N	N	ASU_12730	1	GS_13740,GS_14927,GS_20559	3
AgB03	1473698	1479857	AgB03_g093	-	Golgi transport protein 1	N	N	N	N	ASU_05364	1	GS_20172	1
AgB03	1477048	1478401	AgB03_g094	.	Golgi transport protein 1	N	N	N	N	ASU_05364	1	GS_20172	1
AgB03	1507546	1518189	AgB03_g095	-	Tyrosine-protein kinase kin-31	N	N	N	N	ASU_12731	1	GS_01977,GS_14927,GS_20559	3
AgB03	1518748	1524006	AgB03_g096	-	Crossover junction endonuclease MUS81	N	N	N	N	ASU_12732	1	GS_21233	1
AgB03	1526577	1539797	AgB03_g097	-	atp-binding cassette sub-family d member 4	N	N	N	N	ASU_12733	1	GS_09393	1
AgB03	1541413	1541791	AgB03_g098	.	hypothetical protein	Y	Y	Y	N
AgB03	1554016	1575048	AgB03_g099	-	Organic solute transporter alpha-like protein	N	N	N	N	ASU_12734	1	GS_04169	1
AgB03	1614847	1622026	AgB03_g100	+	hypothetical protein	N	N	N	N	ASU_07544	1	GS_19580	1
AgB03	1619047	1619576	AgB03_g101	.	hypothetical protein	Y	Y	Y	N
AgB03	1623866	1628233	AgB03_g102	-	hypothetical protein	N	N	N	N	ASU_07543	1	Liv_01297	1
AgB03	1638056	1645573	AgB03_g103	+	hypothetical protein	N	Y	N	N	ASU_07542	1
AgB03	1648322	1658176	AgB03_g104	+	Cell division cycle protein 20	N	N	N	N	ASU_07541	1	GS_10465,GS_17329	2
AgB03	1663270	1689646	AgB03_g105	+	Structural maintenance of chromosomes protein 2	N	N	N	N	ASU_06369,ASU_14648,ASU_15089	3	GS_22300	1
AgB03	1677161	1695129	AgB03_g106	-	BTB/POZ domain-containing protein KCTD16	N	N	N	N	ASU_15090,ASU_15102	2	GS_04706,GS_06936,GS_23691	3
AgB03	1683175	1683706	AgB03_g107	.	BTB/POZ domain-containing protein KCTD16	Y	N	N	N			GS_04706	1
AgB03	1713230	1721712	AgB03_g108	-	transmembrane protein	N	N	N	N	ASU_06370	1	GS_14194	1
AgB03	1724489	1735342	AgB03_g109	-	Transmembrane protein 144	N	N	N	N	ASU_15116	1	GS_00119,GS_08683	2
AgB03	1735129	1738952	AgB03_g110	+	Transmembrane protein 144	Y	Y	Y	N
AgB03	1744912	1750523	AgB03_g111	-	Serpentine receptor class delta-19	N	N	N	N	ASU_11652	1	GS_19132	1
AgB03	1762855	1770743	AgB03_g112	-	protein wntless-like protein	Y	N	N	N			GS_17467	1
AgB03	1803128	1809493	AgB03_g113	-	V-type proton ATPase 116 kDa subunit a	Y	N	N	N			GS_13250	1
AgB03	1812042	1835753	AgB03_g114	-	V-type proton ATPase 116 kDa subunit a	N	N	N	N	ASU_13822	1	GS_07825	1
AgB03	1824173	1840367	AgB03_g115	+	hypothetical protein	N	N	N	N	ASU_13823	1	L4_01327	1
AgB03	1844887	1845540	AgB03_g116	-	hypothetical protein	Y	Y	Y	N
AgB03	1862138	1868660	AgB03_g117	-	hypothetical protein	N	N	N	N	ASU_13824	1	GS_03213	1
AgB03	1872266	1880192	AgB03_g118	-	Transmembrane protein 203	N	N	N	N	ASU_03965	1	GS_05071	1
AgB03	1883304	1888370	AgB03_g119	-	electron transfer flavoprotein subunit beta	N	N	N	N	ASU_03966	1	GS_24170	1
AgB03	1898937	1899145	AgB03_g120	+	Electron transfer flavoprotein subunit beta	Y	Y	Y	N
AgB03	1903101	1906614	AgB03_g121	-	Electron transfer flavoprotein subunit beta	Y	Y	Y	N
AgB03	1906166	1906628	AgB03_g122	+	Electron transfer flavoprotein subunit beta	Y	Y	Y	N
AgB03	1906970	1913949	AgB03_g123	+	Electron transfer flavoprotein subunit beta	N	N	N	N	ASU_03967	1	GS_13238	1
AgB03	1917548	1942232	AgB03_g124	-	ap-3 complex subunit delta-1	N	N	N	N	ASU_03968	1	GS_02401,GS_02680,GS_11064	3
AgB03	1944316	1950671	AgB03_g125	+	Dihydropteridine reductase	N	N	N	N	ASU_03969	1	GS_10622	1
AgB03	1952106	1958563	AgB03_g126	-	hypothetical protein	N	N	N	N	ASU_03970	1	GS_13464,GS_21263	2
AgB03	1966942	1988968	AgB03_g127	+	Transcription elongation regulator 1	N	N	N	N	ASU_08861	1	GS_16148,GS_24078	2
AgB03	2018275	2031826	AgB03_g128	+	Glutamate-gated chloride channel, partial	N	N	N	N	ASU_08862	1	GS_05346	1
AgB03	2037428	2042906	AgB03_g129	+	parkin coregulated protein	N	N	N	N	ASU_08863	1	GS_01087,GS_06356	2
AgB03	2060055	2064361	AgB03_g130	-	lbp bpi cetp family domain-containing protein	Y	Y	Y	N
AgB03	2078780	2107366	AgB03_g131	+	Paternally-expressed protein	N	N	N	N	ASU_08864	1	GS_14683,GS_21727	2
AgB03	2127468	2134398	AgB03_g132	+	Centrosomal protein of 104 kDa	N	N	N	N	ASU_08865	1	GS_16859	1
AgB03	2135046	2165867	AgB03_g133	+	mucosa-associated lymphoid tissue lymphoma translocation protein 1	N	N	N	N	ASU_08866	1	GS_02736,GS_10277	2
AgB03	2168214	2178890	AgB03_g134	-	Mucosa-associated lymphoid tissue lymphoma translocation protein 1	N	Y	N	N	ASU_08867	1
AgB03	2193023	2204730	AgB03_g135	+	Homeobox protein ceh-38	Y	Y	Y	N
AgB03	2217856	2225641	AgB03_g136	+	hypothetical protein	N	N	N	N	ASU_08869	1	GS_21276	1
AgB03	2229071	2233966	AgB03_g137	-	PQ-loop repeat-containing protein 2	N	N	N	N	ASU_08870	1	GS_08826	1
AgB03	2235790	2242887	AgB03_g138	+	hypothetical protein	N	Y	N	N	ASU_07009	1
AgB03	2258273	2269857	AgB03_g139	+	Methylmalonate-semialdehyde dehydrogenase acylating	N	N	N	N	ASU_07011	1	GS_22215	1
AgB03	2274410	2281906	AgB03_g140	+	transmembrane protein	N	N	N	N	ASU_07012	1	GS_06606	1
AgB03	2289170	2298011	AgB03_g141	+	hypothetical protein	N	N	N	N	ASU_07013	1	GS_02493,GS_19579	2
AgB03	2318657	2342635	AgB03_g142	+	Sodium/potassium-transporting ATPase subunit alpha-1	N	N	N	N	ASU_07014	1	GS_09028	1
AgB03	2349998	2352639	AgB03_g143	+	hypothetical protein	N	N	N	N	ASU_07015	1	L3E_02367	1
AgB03	2351477	2357034	AgB03_g144	-	hypothetical protein	Y	N	N	N			GS_04294	1
AgB03	2358627	2386628	AgB03_g145	-	Solute carrier family 22 member 15	Y	Y	Y	N
AgB03	2410948	2415168	AgB03_g146	-	2-acylglycerol O-acyltransferase 1	Y	N	N	N			GS_17002	1
AgB03	2433158	2436370	AgB03_g147	-	hypothetical protein	Y	N	N	N			GS_06472	1
AgB03	2467253	2478223	AgB03_g148	+	NGFI-A-binding protein	N	N	N	N	ASU_07019	1	GS_12030	1
AgB03	2459568	2459967	AgB03_g149	.	hypothetical protein	Y	Y	Y	N
AgB03	2490043	2490435	AgB03_g150	.	hypothetical protein	Y	Y	Y	N
AgB03	2497335	2504863	AgB03_g151	-	hypothetical protein	N	N	N	N	ASU_07020,ASU_07021	2	GS_01067	1
AgB03	2545300	2549917	AgB03_g152	+	hypothetical protein	N	N	N	N	ASU_07022	1	GS_19643	1
AgB03	2552026	2557746	AgB03_g153	-	hypothetical protein	N	N	N	N	ASU_07023	1	GS_20033	1
AgB03	2566796	2567375	AgB03_g154	.	hypothetical protein	Y	Y	Y	N
AgB03	2567610	2573220	AgB03_g155	-	e3 ubiquitin-protein ligase march2	N	Y	N	N	ASU_07024	1
AgB03	2581192	2590142	AgB03_g156	-	hypothetical protein	Y	Y	Y	N
AgB03	2604763	2612623	AgB03_g157	+	UV excision repair protein RAD23 A	N	N	N	N	ASU_11849	1	GS_15075	1
AgB03	2621970	2623305	AgB03_g158	-	hypothetical protein	Y	Y	Y	N
AgB03	2624061	2629052	AgB03_g159	-	hypothetical protein	Y	Y	Y	N
AgB03	2642855	2651837	AgB03_g160	+	aquaporin-10	N	N	N	N	ASU_11851	1	GS_08679	1
AgB03	2652121	2659308	AgB03_g161	-	hypothetical protein	N	N	N	N	ASU_11852	1	GS_12590	1
AgB03	2661661	2668688	AgB03_g162	-	26S protease regulatory subunit 6B, partial	N	N	N	N	ASU_11853	1	GS_17585	1
AgB03	2669658	2675389	AgB03_g163	+	hypothetical protein	N	N	N	N	ASU_04246	1	GS_15543	1
AgB03	2676638	2694417	AgB03_g164	+	nadh oxidase	N	N	N	N	ASU_04243,ASU_04244,ASU_04245	3	GS_02685,GS_04331,GS_22772	3
AgB03	2694074	2719092	AgB03_g165	-	sterol regulatory element-binding protein cleavage-activating protein	N	N	N	N	ASU_04242	1	GS_04402,GS_15087	2
AgB03	2721771	2730623	AgB03_g166	-	hypothetical protein	N	N	N	N	ASU_04241	1	GS_01242,GS_06481	2
AgB03	2734863	2746770	AgB03_g167	-	hypothetical protein	N	N	N	N	ASU_04240	1	GS_19040	1
AgB03	2746982	2760621	AgB03_g168	-	Cleavage stimulation factor subunit 1	N	N	N	N	ASU_04239	1	GS_13922	1
AgB03	2761132	2761689	AgB03_g169	.	hypothetical protein	Y	Y	Y	N
AgB03	2777139	2801336	AgB03_g170	-	arid domain-containing protein	N	N	N	N	ASU_04236,ASU_04237,ASU_04238	3	GS_00324,GS_07063,GS_13051	3
AgB03	2813006	2817586	AgB03_g171	+	hypothetical protein	Y	Y	Y	N
AgB03	2815394	2839222	AgB03_g172	-	putative methionine synthase	N	N	N	N	ASU_04235	1	GS_07296,GS_09722	2
AgB03	2819052	2821282	AgB03_g173	.	Methionine synthase	Y	Y	Y	N
AgB03	2845524	2864328	AgB03_g174	-	hypothetical protein	N	N	N	N	ASU_04234	1	GS_01013,GS_12833,GS_16908	3
AgB03	2879923	2905090	AgB03_g175	+	nose resistant to fluoxetine protein 6	N	N	N	N	ASU_04232	1	GS_06233,GS_17567,GS_23614	3
AgB03	2905615	2912722	AgB03_g176	-	neuropeptide receptor a8	N	N	N	N	ASU_04231	1	GS_05649	1
AgB03	3008175	3029442	AgB03_g177	+	Mediator of RNA polymerase II transcription subunit 13	N	N	N	N	ASU_04230	1	GS_03452,GS_07243,GS_09191,GS_11962,GS_12963,GS_21424,GS_22360	7
AgB03	3089893	3094891	AgB03_g178	+	hypothetical protein	N	N	N	N	ASU_04229	1	GS_10170	1
AgB03	3115611	3120392	AgB03_g179	-	db module family protein	Y	N	N	N			GS_00512	1
AgB03	3121897	3124763	AgB03_g180	-	hypothetical protein	N	N	N	N	ASU_14775	1	GS_08985	1
AgB03	3139318	3141365	AgB03_g181	+	hypothetical protein	N	N	N	N	ASU_12191	1	GS_02119	1
AgB03	3145720	3153889	AgB03_g182	-	Serine/threonine-protein kinase	N	N	N	N	ASU_12192	1	GS_05226,GS_14582	2
AgB03	3162111	3164881	AgB03_g183	-	hypothetical protein	N	N	N	N	ASU_12193	1	GS_10436,GS_13446	2
AgB03	3177408	3182579	AgB03_g184	-	hypothetical protein	N	N	N	N	ASU_12194	1	GS_02101,GS_18845,GS_19779	3
AgB03	3184347	3187944	AgB03_g185	+	T-complex protein 1 subunit alpha	N	N	N	N	ASU_12195	1	GS_21105	1
AgB03	3187649	3188453	AgB03_g186	-	T-complex protein 1 subunit alpha	Y	Y	Y	N
AgB03	3189166	3194082	AgB03_g187	+	T-complex protein 1 subunit alpha	N	N	N	N	ASU_12195	1	GS_21105	1
AgB03	3198208	3216593	AgB03_g188	-	hypothetical protein	N	N	N	N	ASU_12196	1	GS_02308	1
AgB03	3215227	3241797	AgB03_g189	+	multidrug resistance protein pgp-1	N	N	N	N	ASU_12446	1	GS_07518,GS_13013	2
AgB03	3257041	3258574	AgB03_g190	+	Ferric-chelate reductase 1	N	N	N	N	ASU_12444	1	GS_11764	1
AgB03	3260867	3267005	AgB03_g191	+	ferric-chelate reductase 1	N	N	N	N	ASU_12443	1	GS_03437,GS_22172	2
AgB03	3269037	3283159	AgB03_g192	+	Ankyrin repeat and LEM domain-containing protein 2	N	N	N	N	ASU_12442	1	GS_09290,GS_14466	2
AgB03	3283620	3303297	AgB03_g193	-	patched family protein	N	N	N	N	ASU_12441	1	GS_08983,GS_11730,GS_15394	3
AgB03	3321091	3324547	AgB03_g194	+	hypothetical protein	Y	Y	Y	N
AgB03	3328097	3379328	AgB03_g195	+	rfx-like transcription factor daf-19	N	N	N	N	ASU_01592	1	GS_23322	1
AgB03	3396680	3404604	AgB03_g196	+	hypothetical protein	N	N	N	N	ASU_01594	1	GS_13047	1
AgB03	3421805	3427531	AgB03_g197	+	hypothetical protein	Y	Y	Y	N
AgB03	3446613	3453328	AgB03_g198	-	Prohibitin complex protein 2	N	N	N	N	ASU_01595	1	GS_23087	1
AgB03	3454843	3468646	AgB03_g199	+	Sperm-specific class P protein 31	Y	N	N	N			GS_13214	1
AgB03	3468813	3477173	AgB03_g200	-	Methyltransferase C20orf7	N	N	N	N	ASU_12350	1	GS_16185	1
AgB03	3481752	3484816	AgB03_g201	-	Dolichyl-P-Man:Man(5)GlcNAc(2)-PP-dolichyl mannosyltransferase	N	Y	N	N	ASU_12351	1
AgB03	3505679	3512129	AgB03_g202	-	Uncharacterized protein C19orf29	N	N	N	N	ASU_12352	1	GS_09197	1
AgB03	3496150	3500536	AgB03_g203	+	Serine/threonine-protein kinase	N	N	N	N	ASU_12353	1	GS_18147	1
AgB03	3502228	3503648	AgB03_g204	-	Serine/threonine-protein kinase	Y	Y	Y	N
AgB03	3505157	3506411	AgB03_g205	+	Uncharacterized protein C19orf29	Y	Y	Y	N
AgB03	3510596	3522119	AgB03_g206	+	Family 31 glucosidase	N	N	N	N	ASU_12354,ASU_12355	2	GS_02930,GS_04250,GS_22264	3
AgB03	3519757	3526536	AgB03_g207	-	Tau-tubulin kinase 1	N	N	N	N	ASU_12355,ASU_13329	2	GS_02930,GS_20355	2
AgB03	3530501	3537833	AgB03_g208	+	db module family protein	N	N	N	N	ASU_12356	1	GS_08342	1
AgB03	3544714	3561251	AgB03_g209	+	Lipopolysaccharide-binding protein	N	N	N	N	ASU_13401	1	GS_06600,GS_13509	2
AgB03	3564800	3569366	AgB03_g210	+	gnat family protein	N	N	N	N	ASU_13402	1	GS_13015	1
AgB03	3572137	3576419	AgB03_g211	-	Peroxidasin	N	Y	N	N	ASU_13403	1
AgB03	3577130	3583233	AgB03_g212	-	Peroxidasin	N	N	N	N	ASU_13404	1	GS_13349	1
AgB03	3610867	3616114	AgB03_g213	-	histone deacetylase 10	N	N	N	N	ASU_13405	1	GS_05150,GS_22547	2
AgB03	3617149	3619707	AgB03_g214	-	atrial natriuretic peptide receptor 1	Y	Y	Y	N
AgB03	3624548	3642495	AgB03_g215	-	hypothetical protein	Y	Y	Y	N
AgB03	3655923	3656681	AgB03_g216	+	zinc c2h2 type family protein	Y	Y	Y	N
AgB03	3663473	3664282	AgB03_g217	-	hypothetical protein	Y	Y	Y	N
AgB03	3667977	3671966	AgB03_g218	+	Dynamin-like 120 kDa protein	Y	Y	Y	N
AgB03	3677519	3687816	AgB03_g219	+	hypothetical protein	N	Y	N	N	ASU_15241	1
AgB03	3677536	3683428	AgB03_g220	-	hypothetical protein	Y	Y	Y	N
AgB03	3691719	3708091	AgB03_g221	-	X-linked retinitis pigmentosa GTPase regulator-interacting protein 1, partial	N	N	N	N	ASU_12049,ASU_12050	2	GS_01632,GS_10964,GS_22829	3
AgB03	3708794	3713764	AgB03_g222	-	hypothetical protein	Y	N	N	N			GS_16146	1
AgB03	3728937	3731754	AgB03_g223	-	Testis-expressed sequence 2 protein	Y	Y	Y	N
AgB03	3733951	3735225	AgB03_g224	-	transmembrane protein	Y	Y	Y	N
AgB03	3736988	3740894	AgB03_g225	+	Transmembrane protein 144	N	N	N	N	ASU_07344	1	GS_15640	1
AgB03	3748518	3757820	AgB03_g226	+	vacuolar protein-sorting-associated protein 36	N	N	N	N	ASU_07343	1	GS_20698	1
AgB03	3759247	3766525	AgB03_g227	+	Pre-mRNA polyadenylation factor fip1, partial	N	N	N	N	ASU_07342	1	GS_12178	1
AgB03	3766910	3771531	AgB03_g228	+	hypothetical protein	N	N	N	N	ASU_07342	1	GS_12178	1
AgB03	3774676	3789645	AgB03_g229	+	f-box domain-containing protein	N	N	N	N	ASU_07341	1	GS_10469	1
AgB03	3789733	3790205	AgB03_g230	.	hypothetical protein	Y	Y	Y	N
AgB03	3790301	3797167	AgB03_g231	-	Splicing factor, arginine/serine-rich 3	N	N	N	N	ASU_07340	1	GS_08030	1
AgB03	3802541	3806252	AgB03_g232	+	Uncharacterized protein T19C3.2	N	N	N	N	ASU_07339	1	GS_17747	1
AgB03	3807740	3818341	AgB03_g233	-	Protein artemis, partial	N	N	N	N	ASU_07337,ASU_07338	2	GS_01975	1
AgB03	3819195	3828508	AgB03_g234	-	protein artemis	N	N	N	N	ASU_07337	1	GS_01975	1
AgB03	3830027	3831613	AgB03_g235	+	Histone H4	N	N	N	N	ASU_07334	1	GS_10336	1
AgB03	3833341	3836847	AgB03_g236	-	Histone H2B.1/H2B.2	N	N	N	N	ASU_07332,ASU_07333,ASU_07335,ASU_07336	4	GS_13585,GS_13604,GS_18976,GS_23637	4
AgB03	3833549	3836441	AgB03_g237	+	Histone H2B.1/H2B.2	N	N	N	N	ASU_07332,ASU_07333,ASU_07335,ASU_07336	4	GS_13585,GS_13604,GS_18976,GS_23637	4
AgB03	3844019	3847755	AgB03_g238	+	hypothetical protein	Y	Y	Y	N
AgB03	3849458	3851866	AgB03_g239	+	hypothetical protein	Y	Y	Y	N
AgB03	3863161	3870322	AgB03_g240	+	Growth factor receptor-bound protein 2	N	N	N	N	ASU_07330	1	GS_03032,GS_20581	2
AgB03	3863080	3873798	AgB03_g241	-	ATP-dependent Clp protease ATP-binding subunit clpX-like protein	N	N	N	N	ASU_07329	1	GS_03032	1
AgB03	3874562	3875270	AgB03_g242	-	ATP-dependent Clp protease ATP-binding subunit clpX-like protein	Y	Y	Y	N
AgB03	3880166	3881989	AgB03_g243	-	atp-dependent clp protease atp-binding subunit clpx	Y	N	N	N			GS_08486	1
AgB03	3883003	3891406	AgB03_g244	-	hypothetical protein	N	N	N	N	ASU_07328	1	GS_16118	1
AgB03	3891764	3910023	AgB03_g245	+	zinc metalloproteinase nas-36	N	N	N	N	ASU_07327	1	GS_07719	1
AgB03	3912395	3917020	AgB03_g246	+	Zinc metalloproteinase dpy-31	N	N	N	N	ASU_07327	1	GS_22432	1
AgB03	3922250	3931469	AgB03_g247	+	Mediator of RNA polymerase II transcription subunit 19	N	N	N	N	ASU_07325,ASU_07326	2	GS_18546	1
AgB03	3927612	3933058	AgB03_g248	-	Cysteine desulfurase	N	Y	N	N	ASU_07325	1
AgB03	3931895	3949985	AgB03_g249	+	putative cysteine desulfurase	N	N	N	N	ASU_07324	1	GS_05735	1
AgB03	3945819	3946280	AgB03_g250	.	Retrovirus-related Pol polyprotein from type-1 retrotransposable element R2	Y	Y	Y	N
AgB03	3953914	3965395	AgB03_g251	+	Cyclin-like protein	N	N	N	N	ASU_07323	1	GS_00628,GS_05917	2
AgB03	3967004	3972644	AgB03_g252	+	pith domain-containing protein	N	N	N	N	ASU_07322	1	GS_10435	1
AgB03	3975055	3990512	AgB03_g253	+	f-box domain-containing protein	N	N	N	N	ASU_04407,ASU_14675,ASU_14676,ASU_14874	4	GS_00926,GS_10339,GS_14667	3
AgB03	4025373	4033141	AgB03_g254	-	deoxynucleotidyltransferase terminal-interacting protein 1	N	N	N	N	ASU_04408	1	GS_15930	1
AgB03	4036882	4058052	AgB03_g255	-	Arginyl-tRNA synthetase, partial	N	N	N	N	ASU_04409,ASU_14636	2	GS_03942,GS_14494	2
AgB03	4059394	4064828	AgB03_g256	-	putative dna-directed rna polymerases and iii subunit rpabc3	N	N	N	N	ASU_14635	1	GS_00373	1
AgB03	4065490	4080328	AgB03_g257	+	hypothetical protein	N	N	N	N	ASU_14634	1	GS_00282	1
AgB03	4086231	4093831	AgB03_g258	-	Tyrosine-protein kinase Fps85D	N	N	N	N	ASU_13000,ASU_15261	2	GS_01157,GS_02194	2
AgB03	4091574	4102156	AgB03_g259	+	Tyrosine-protein kinase Fps85D	N	N	N	N	ASU_13000,ASU_14633	2	GS_01157,GS_02194	2
AgB03	4106373	4126388	AgB03_g260	+	sodium-dependent dopamine transporter	N	N	N	N	ASU_13001	1	GS_12796,GS_17555	2
AgB03	4130436	4150409	AgB03_g261	-	heat shock 70 kda protein 4	N	N	N	N	ASU_13002	1	GS_11945	1
AgB03	4143466	4144267	AgB03_g262	+	heat shock 70 kda protein 4	Y	Y	Y	N
AgB03	4155359	4172787	AgB03_g263	+	26S proteasome non-ATPase regulatory subunit 3	N	N	N	N	ASU_13003	1	GS_15669,GS_22783	2
AgB03	4177673	4182763	AgB03_g264	-	hypothetical protein	N	N	N	N	ASU_15134	1	GS_23725	1
AgB03	4184951	4185276	AgB03_g265	.	hypothetical protein	Y	Y	Y	N
AgB03	4191714	4224899	AgB03_g266	+	hypothetical protein	N	N	N	N	ASU_09188,ASU_15076,ASU_15134,ASU_15170,ASU_15190	5	GS_16477	1
AgB03	4220354	4220834	AgB03_g267	.	Histidine-rich protein PFHRP-II	Y	Y	Y	N
AgB03	4233253	4234341	AgB03_g268	.	hypothetical protein	Y	Y	Y	N
AgB03	4237037	4260587	AgB03_g269	+	copine family protein 2	N	N	N	N	ASU_11603	1	GS_06565	1
AgB03	4254023	4282853	AgB03_g270	-	Arf-GAP with coiled-coil, ANK repeat and PH domain-containing protein 2	N	N	N	N	ASU_11602	1	GS_02985,GS_07860	2
AgB03	4284315	4293734	AgB03_g271	-	Maltase-glucoamylase	Y	N	N	N			GS_06701	1
AgB03	4305571	4306667	AgB03_g272	-	hypothetical protein	Y	N	N	N			GS_20286	1
AgB03	4347087	4360483	AgB03_g273	-	Transient-receptor-potential-like protein	N	N	N	N	ASU_04312	1	GS_13974	1
AgB03	4374558	4380022	AgB03_g274	+	hypothetical protein	Y	Y	Y	N
AgB03	4388479	4392432	AgB03_g275	+	hypothetical protein	Y	N	N	N			GS_02340,GS_09030	2
AgB03	4393118	4419499	AgB03_g276	+	Actin-2, partial	Y	N	N	N			GS_13614	1
AgB03	4419665	4426364	AgB03_g277	+	Protein TIPIN	N	N	N	N	ASU_04307,ASU_04308	2	GS_10838,GS_17185,GS_19460	3
AgB03	4469352	4492608	AgB03_g278	+	Nuclear hormone receptor family member nhr-31, partial	Y	N	N	N			GS_04923,GS_22533	2
AgB03	4493204	4496386	AgB03_g279	+	Protein F37C4.5	Y	N	N	N			GS_13265	1
AgB03	4497341	4504875	AgB03_g280	-	Protein F37C4.5	Y	N	N	N			GS_13265	1
AgB03	4514354	4533763	AgB03_g281	-	Protein F37C4.5	N	N	N	N	ASU_04303	1	GS_18853	1
AgB03	4536105	4541829	AgB03_g282	-	Protein F37C4.5	N	Y	N	N	ASU_07685	1
AgB03	4542868	4551085	AgB03_g283	-	Protein F37C4.5	N	N	N	N	ASU_07684,ASU_07685	2	GS_23905	1
AgB03	4560067	4567098	AgB03_g284	-	Proteasome subunit alpha type-5	N	N	N	N	ASU_07683	1	GS_10844	1
AgB03	4568533	4578392	AgB03_g285	-	ATP-dependent RNA helicase eIF4A	N	N	N	N	ASU_07682	1	GS_01399,GS_06856	2
AgB03	4581755	4593716	AgB03_g286	-	Purine nucleoside phosphorylase	N	N	N	N	ASU_07681	1	GS_22953	1
AgB03	4609649	4637175	AgB03_g287	+	Helicase SKI2W	N	N	N	N	ASU_01226,ASU_01227	2	GS_01556,GS_16099,GS_18967	3
AgB03	4631968	4639135	AgB03_g288	+	hypothetical protein	N	N	N	N	ASU_01226	1	GS_16099	1
AgB03	4639287	4644985	AgB03_g289	+	hypothetical protein	N	N	N	N	ASU_01225	1	GS_23481	1
AgB03	4646977	4649445	AgB03_g290	+	hypothetical protein	N	Y	N	N	ASU_01224	1
AgB03	4656998	4659687	AgB03_g291	+	hypothetical protein	N	N	N	N	ASU_01223	1	GS_21283	1
AgB03	4657087	4657420	AgB03_g292	.	hypothetical protein	Y	Y	Y	N
AgB03	4660756	4676542	AgB03_g293	+	S-phase kinase-associated protein 2	N	N	N	N	ASU_01222	1	GS_20052	1
AgB03	4677647	4685484	AgB03_g294	-	serine threonine-protein kinase rio1	N	N	N	N	ASU_01219,ASU_01221	2	GS_11581,GS_22711	2
AgB03	4765311	4776201	AgB03_g295	+	Bifunctional purine biosynthesis protein PURH	N	N	N	N	ASU_01217,ASU_01218	2	GS_11371,GS_16770	2
AgB03	4778068	4817267	AgB03_g296	-	Bifunctional purine biosynthesis protein PURH	N	N	N	N	ASU_01216	1	GS_11050	1
AgB03	4783898	4789474	AgB03_g297	.	bifunctional purine biosynthesis protein purh	Y	Y	Y	N
AgB03	4825564	4839229	AgB03_g298	-	nicotinate phosphoribosyltransferase	N	N	N	N	ASU_01215	1	GS_03042	1
AgB03	4829078	4830394	AgB03_g299	.	Nicotinate phosphoribosyltransferase	Y	Y	Y	N
AgB03	4846609	4867116	AgB03_g300	-	hypothetical protein	N	N	N	N	ASU_01211,ASU_01212,ASU_01213,ASU_01214	4	GS_03404,GS_06285,GS_14144,GS_16267	4
AgB03	4873215	4885769	AgB03_g301	-	hypothetical protein	N	N	N	N	ASU_01210	1	GS_08863	1
AgB03	4883193	4887397	AgB03_g302	.	DNA mismatch repair protein Msh2	Y	Y	Y	N
AgB03	4888249	4888735	AgB03_g303	.	hypothetical protein	Y	Y	Y	N
AgB03	4925686	4931416	AgB03_g304	+	Hepatocyte growth factor-regulated tyrosine kinase substrate	N	N	N	N	ASU_01209	1	GS_16965	1
AgB03	4938468	4947773	AgB03_g305	-	chromobox protein-like protein 5	N	N	N	N	ASU_01208	1	GS_06430	1
AgB03	4952394	4981393	AgB03_g306	-	putative phosphorylase b kinase regulatory subunit beta	N	N	N	N	ASU_01207	1	GS_05199,GS_12262	2
AgB03	5012436	5033832	AgB03_g307	+	NADH-dependent flavin oxidoreductase	N	N	N	N	ASU_01206	1	GS_23632	1
AgB03	5038744	5043765	AgB03_g308	-	Oxidoreductase	N	N	N	N	ASU_01205	1	GS_10463	1
AgB03	5043914	5051844	AgB03_g309	-	hypothetical protein	N	N	N	N	ASU_01204	1	GS_09532	1
AgB03	5051900	5098698	AgB03_g310	-	Cysteinyl-tRNA synthetase	N	N	N	N	ASU_01201,ASU_01202,ASU_01203	3	GS_03579,GS_24197,L3E_01859	3
AgB03	5100152	5112121	AgB03_g311	+	nuclear hormone receptor family member nhr-5	N	N	N	N	ASU_01200	1	GS_16247	1
AgB03	5132470	5137004	AgB03_g312	-	hypothetical protein	N	N	N	N	ASU_01199	1	GS_17444	1
AgB03	5143752	5149188	AgB03_g313	-	hypothetical protein	N	N	N	N	ASU_01198	1	GS_03564	1
AgB03	5151347	5172760	AgB03_g314	-	hypothetical protein	N	N	N	N	ASU_01197	1	GS_11623,GS_19768,GS_24210	3
AgB03	5171791	5172592	AgB03_g315	.	hypothetical protein	Y	N	N	N			GS_11623	1
AgB03	5190558	5190715	AgB03_g316	.	Uncharacterized protein R09E10.5	Y	Y	Y	N
AgB03	5203103	5208234	AgB03_g317	+	hypothetical protein	Y	Y	Y	N
AgB03	5224168	5236433	AgB03_g318	-	scm-like with four mbt domains protein 2	N	N	N	N	ASU_04769	1	GS_04165,GS_06389	2
AgB03	5236924	5245156	AgB03_g319	-	Major facilitator superfamily domain-containing protein 5	N	N	N	N	ASU_04768	1	GS_02228	1
AgB03	5248361	5250631	AgB03_g320	-	hypothetical protein	Y	Y	Y	N
AgB03	5254192	5258887	AgB03_g321	+	lipase family protein	N	N	N	N	ASU_04767	1	GS_04869	1
AgB03	5261727	5269937	AgB03_g322	-	lipase family protein	N	N	N	N	ASU_04766	1	GS_04026,GS_17926	2
AgB03	5274233	5295922	AgB03_g323	+	Centrosomal protein of 97 kDa	N	N	N	N	ASU_04765	1	GS_00465,GS_07612,GS_21208	3
AgB03	5303498	5358831	AgB03_g324	-	doublesex mab-3 domain family member (dmd-6)	N	N	N	N	ASU_04763,ASU_04764	2	GS_06506,GS_07733	2
AgB03	5372977	5380059	AgB03_g325	.	Glycosyltransferase family 92 protein F59C6.8	Y	N	N	N			GS_18358	1
AgB03	5373316	5385721	AgB03_g326	-	Glycosyltransferase family 92 protein F59C6.8	N	N	N	N	ASU_04762	1	GS_18358	1
AgB03	5387358	5401127	AgB03_g327	+	Patched domain-containing protein 3, partial	N	N	N	N	ASU_04761	1	GS_17644,GS_20011,GS_23570	3
AgB03	5403818	5416595	AgB03_g328	+	patched-related protein 9	N	N	N	N	ASU_04760	1	GS_01143	1
AgB03	5431165	5433776	AgB03_g329	+	patched-related protein 9	N	N	N	N	ASU_04759	1	GS_05400,GS_17974,GS_22639	3
AgB03	5436488	5457563	AgB03_g330	-	Cell cycle control protein 50A	N	N	N	N	ASU_04758	1	GS_05400,GS_12957	2
AgB03	5449483	5457930	AgB03_g331	.	Cell cycle control protein 50A	Y	Y	Y	N
AgB03	5462312	5471224	AgB03_g332	+	V-type proton ATPase subunit C	N	N	N	N	ASU_04757	1	GS_11040	1
AgB03	5472650	5486808	AgB03_g333	+	Ufm1-specific protease	N	N	N	N	ASU_04756	1	GS_13680	1
AgB03	5493658	5494790	AgB03_g334	-	hypothetical protein	Y	Y	Y	N
AgB03	5496731	5513522	AgB03_g335	+	hypothetical protein	N	N	N	N	ASU_04754,ASU_04755	2	GS_22593	1
AgB03	5515616	5516097	AgB03_g336	.	Neprilysin-1	Y	N	N	N			GS_03394	1
AgB03	5516376	5521425	AgB03_g337	-	Neprilysin-1	N	N	N	N	ASU_04753	1	GS_08624	1
AgB03	5523004	5528040	AgB03_g338	-	neprilysin-2	N	N	N	N	ASU_04752	1	GS_16947	1
AgB03	5549910	5588981	AgB03_g339	-	Protein sidekick	N	N	N	N	ASU_04750,ASU_04751	2	GS_12625,GS_15086,GS_22223	3
AgB03	5658454	5660822	AgB03_g340	+	hypothetical protein	N	N	N	N	ASU_04747,ASU_04748,ASU_04749	3	GS_15712,GS_20653	2
AgB03	5647969	5657858	AgB03_g341	-	hypothetical protein	Y	Y	Y	N
AgB03	5664037	5667103	AgB03_g342	+	hypothetical protein	N	Y	N	N	ASU_15243	1
AgB03	5667281	5686454	AgB03_g343	+	Protein KIAA0100	N	Y	N	N	ASU_15031,ASU_15113	2
AgB03	5713749	5717291	AgB03_g344	+	hypothetical protein	Y	Y	Y	N
AgB03	5734520	5739509	AgB03_g345	+	hypothetical protein	Y	Y	Y	N
AgB03	5745565	5754288	AgB03_g346	+	F-box/LRR-repeat protein	N	N	N	N	ASU_08753	1	GS_19076	1
AgB03	5792666	5815086	AgB03_g347	+	Leucyl-tRNA synthetase	N	N	N	N	ASU_05219,ASU_08754	2	GS_20465	1
AgB03	5819515	5825911	AgB03_g348	+	Solute carrier family 25 member 40	N	N	N	N	ASU_05220	1	GS_09024,GS_14580	2
AgB03	5833244	5836192	AgB03_g349	.	hypothetical protein	Y	Y	Y	N
AgB03	5838023	5852087	AgB03_g350	-	Phosphoenolpyruvate carboxykinase GTP	N	N	N	N	ASU_05221,ASU_05222	2	GS_04959,GS_20378	2
AgB03	5894195	5900896	AgB03_g351	-	hypothetical protein	Y	Y	Y	N
AgB03	5896789	5900862	AgB03_g352	.	hypothetical protein	Y	Y	Y	N
AgB03	5901052	5936915	AgB03_g353	-	atx related family member (atx-2)	N	N	N	N	ASU_05223	1	GS_15986	1
AgB03	5944913	5958025	AgB03_g354	-	TBC1 domain family member 10B	N	N	N	N	ASU_05224,ASU_05225	2	GS_23444	1
AgB03	5957497	5964133	AgB03_g355	+	hypothetical protein	N	Y	N	N	ASU_05225	1
AgB03	5968906	5972607	AgB03_g356	+	protein spec3	N	N	N	N	ASU_05226,ASU_05227	2	GS_03561,GS_07235	2
AgB03	5970597	5980591	AgB03_g357	-	RING finger protein nhl-1, partial	N	N	N	N	ASU_05227	1	GS_03561,GS_10460	2
AgB03	5989149	6029419	AgB03_g358	-	Transthyretin-like protein 5, partial	N	N	N	N	ASU_05229	1	GS_07537	1
AgB03	5994845	6002792	AgB03_g359	+	hypothetical protein	N	N	N	N	ASU_05228,ASU_05229	2	GS_17698	1
AgB03	6015450	6018206	AgB03_g360	+	Protein OS-9	Y	N	N	N			GS_04546,L3E_02887	2
AgB03	6018844	6035158	AgB03_g361	+	Protein OS-9	N	N	N	N	ASU_05230	1	GS_20633	1
AgB03	6035488	6056822	AgB03_g362	+	Protein OS-9	N	N	N	N	ASU_05231	1	GS_21266	1
AgB03	6057545	6066077	AgB03_g363	+	hypothetical protein	N	N	N	N	ASU_05232	1	GS_10098	1
AgB03	6064329	6064638	AgB03_g364	.	hypothetical protein	Y	Y	Y	N
AgB03	6071813	6087040	AgB03_g365	+	hypothetical protein	N	N	N	N	ASU_05233	1	GS_20527	1
AgB03	6094847	6113855	AgB03_g366	+	Replication factor A 73 kDa subunit	N	N	N	N	ASU_05234,ASU_05235	2	GS_01268,GS_15192	2
AgB03	6105406	6115188	AgB03_g367	-	Replication factor A 73 kDa subunit	Y	N	N	N			GS_01268	1
AgB03	6115311	6154372	AgB03_g368	+	magnesium transporter nipa2	N	N	N	N	ASU_05236,ASU_05238	2	GS_07708,GS_13781,GS_16882	3
AgB03	6115311	6128605	AgB03_g369	-	Magnesium transporter NIPA2	N	N	N	N	ASU_05236	1	GS_16882	1
AgB03	6157813	6175303	AgB03_g370	+	receptor expression-enhancing protein 2	N	N	N	N	ASU_05239	1	A01321,GS_08183	2
AgB03	6177279	6179497	AgB03_g371	.	hypothetical protein	Y	Y	Y	N
AgB03	6183712	6187331	AgB03_g372	+	putative pre-mrna-splicing factor atp-dependent rna helicase mog-1	N	N	N	N	ASU_05240	1	A01322	1
AgB03	6187556	6187783	AgB03_g373	+	Pre-mRNA-splicing factor ATP-dependent RNA helicase mog-1	Y	Y	Y	N
AgB03	6188320	6203127	AgB03_g374	+	Pre-mRNA-splicing factor ATP-dependent RNA helicase mog-1	N	N	N	N	ASU_05240,ASU_15348	2	GS_14836	1
AgB03	6201363	6205022	AgB03_g375	+	hypothetical protein	N	N	N	N	ASU_05241,ASU_15348	2	GS_22578	1
AgB03	6209325	6217319	AgB03_g376	+	Fucose-1-phosphate guanylyltransferase	Y	Y	Y	N
AgB03	6225348	6229393	AgB03_g377	+	hypothetical protein	Y	Y	Y	N
AgB03	6230705	6234780	AgB03_g378	+	hypothetical protein	Y	Y	Y	N
AgB03	6233337	6233997	AgB03_g379	.	hypothetical protein	Y	Y	Y	N
AgB03	6234503	6256009	AgB03_g380	-	Williams-Beuren syndrome chromosomal region 16 protein, partial	N	N	N	N	ASU_05244	1	GS_10566	1
AgB03	6276331	6278045	AgB03_g381	+	DNA ligase 4, partial	N	N	N	N	ASU_05244	1	GS_02645,GS_10566	2
AgB03	6248372	6249842	AgB03_g382	.	hypothetical protein	Y	Y	Y	N
AgB03	6270540	6274912	AgB03_g383	-	hypothetical protein	N	Y	N	N	ASU_05245,ASU_12996	2
AgB03	6283524	6291887	AgB03_g384	+	DNA ligase 4, partial	N	N	N	N	ASU_12995	1	GS_02645,GS_08108	2
AgB03	6296846	6300869	AgB03_g385	+	hypothetical protein	N	Y	N	N	ASU_12994	1
AgB03	6316492	6341203	AgB03_g386	-	Homeobox protein lin-39	N	N	N	N	ASU_12992,ASU_12993	2	GS_04566,GS_10851	2
AgB03	6379195	6383402	AgB03_g387	-	hypothetical protein	Y	Y	Y	N
AgB03	6386690	6388350	AgB03_g388	+	homeobox protein hox-b3	Y	N	N	N			GS_04719	1
AgB03	6409295	6409721	AgB03_g389	-	Homeobox protein ceh-13	Y	Y	Y	N
AgB03	6412522	6415336	AgB03_g390	-	Homeobox protein ceh-13	N	N	N	N	ASU_01284	1	GS_07940	1
AgB03	6427923	6429358	AgB03_g391	+	homeobox protein hox-b3	Y	Y	Y	N
AgB03	6431608	6442591	AgB03_g392	-	hypothetical protein	N	Y	N	N	ASU_14926	1
AgB03	6449667	6489881	AgB03_g393	+	major facilitator superfamily domain-containing protein 6	N	N	N	N	ASU_04904,ASU_14925	2	GS_09094,GS_21546	2
AgB03	6487360	6495122	AgB03_g394	-	TWiK family of potassium channels protein 7	N	N	N	N	ASU_04903	1	GS_06427,GS_17694	2
AgB03	6497496	6501407	AgB03_g395	-	TWiK family of potassium channels protein 7	N	N	N	N	ASU_04902	1	GS_01155	1
AgB03	6502430	6507046	AgB03_g396	-	TWiK family of potassium channels protein 7	N	N	N	N	ASU_04901	1	GS_01155	1
AgB03	6513910	6523294	AgB03_g397	-	Glycosyltransferase family 92 protein F13G3.3	N	N	N	N	ASU_04899,ASU_04900	2	GS_19618	1
AgB03	6517400	6549358	AgB03_g398	+	hypothetical protein	N	Y	N	N	ASU_04899	1
AgB03	6666276	6676699	AgB03_g399	+	General transcription factor IIH subunit 2, partial	N	N	N	N	ASU_07605,ASU_07608,ASU_07609,ASU_07610,ASU_12699,ASU_14232,ASU_14233,ASU_15260	8	GS_03508,GS_05123,GS_10483,GS_24343,Lung_01326	5
AgB03	6702924	6734570	AgB03_g400	+	t-complex protein 1 subunit zeta	N	N	N	N	ASU_07606,ASU_07607,ASU_12639,ASU_12640	4	GS_01468,GS_06048,GS_06420,GS_11547,GS_23507	5
AgB03	6706069	6714378	AgB03_g401	-	atp-dependent rna helicase cgh-1	N	N	N	N	ASU_12640	1	GS_11547	1
AgB03	6748011	6803228	AgB03_g402	+	phosphatidylcholine:ceramide cholinephosphotransferase 3	N	N	N	N	ASU_12638	1	GS_07634	1
AgB03	6810068	6839146	AgB03_g403	+	putative g-protein coupled receptor tkr-1	N	Y	N	N	ASU_15431	1
AgB03	6828066	6831720	AgB03_g404	+	hypothetical protein	Y	Y	Y	N
AgB03	6832178	6832885	AgB03_g405	.	hypothetical protein	Y	Y	Y	N
AgB03	6833480	6833946	AgB03_g406	.	hypothetical protein	Y	Y	Y	N
AgB03	6834090	6834401	AgB03_g407	.	hypothetical protein	Y	Y	Y	N
AgB03	6835256	6836091	AgB03_g408	.	hypothetical protein	Y	Y	Y	N
AgB03	6836325	6836821	AgB03_g409	.	hypothetical protein	Y	Y	Y	N
AgB03	6837105	6837932	AgB03_g410	.	dynein assembly factor 1, axonemal	Y	Y	Y	N
AgB03	6838007	6838409	AgB03_g411	.	hypothetical protein	Y	Y	Y	N
AgB03	6839882	6840343	AgB03_g412	-	hypothetical protein	Y	Y	Y	N
AgB03	6843136	6846284	AgB03_g413	-	hypothetical protein	Y	Y	Y	N
AgB03	6847105	6853756	AgB03_g414	-	hypothetical protein	Y	Y	Y	N
AgB03	6864827	6869530	AgB03_g415	-	hypothetical protein	N	N	N	N	ASU_14180	1	GS_09554	1
AgB03	6874659	6886626	AgB03_g416	-	exosome complex component rrp43	N	N	N	N	ASU_03375,ASU_12552,ASU_14181,ASU_15019	4	GS_04360,GS_11073	2
AgB03	6900148	6905310	AgB03_g417	+	Organic solute transporter alpha-like protein	N	Y	N	N	ASU_03376	1
AgB03	6903928	6915517	AgB03_g418	-	Organic solute transporter alpha-like protein	N	Y	N	N	ASU_06648,ASU_12553	2
AgB03	6910942	6920796	AgB03_g419	+	hypothetical protein	Y	Y	Y	N
AgB03	6915851	6946258	AgB03_g420	-	peroxisomal multifunctional enzyme a	N	N	N	N	ASU_06649,ASU_06650	2	GS_09784,GS_24336	2
AgB03	6948527	6960127	AgB03_g421	-	hypothetical protein	N	N	N	N	ASU_06651	1	GS_03642	1
AgB03	6963153	6968786	AgB03_g422	-	Inner membrane protease subunit 2	N	N	N	N	ASU_06652	1	GS_19568	1
AgB03	6973796	7002198	AgB03_g423	-	Calpain clp-1	N	N	N	N	ASU_06653	1	GS_01121,GS_22299	2
AgB03	7021838	7038937	AgB03_g424	-	pepsin inhibitor dit33	N	N	N	N	ASU_06654,ASU_06655,ASU_06656,ASU_06657	4	GS_13452,GS_16753,GS_20541	3
AgB03	7052606	7062891	AgB03_g425	-	Uncharacterized protein B0303.4	N	Y	N	N	ASU_06658	1
AgB03	7064186	7069100	AgB03_g426	-	hypothetical protein	Y	Y	Y	N
AgB03	7073846	7081398	AgB03_g427	-	TRAF-interacting protein	N	Y	N	N	ASU_15050	1
AgB03	7084533	7098169	AgB03_g428	-	Tyrosine-protein phosphatase non-receptor type 3	N	N	N	N	ASU_14321	1	GS_09060	1
AgB03	7100704	7105140	AgB03_g429	+	hypothetical protein	N	N	N	N	ASU_14322	1	GS_11078	1
AgB03	7105447	7105653	AgB03_g430	.	Uncharacterized protein ZK632.11	Y	Y	Y	N
AgB03	7107022	7118762	AgB03_g431	+	hypothetical protein	N	N	N	N	ASU_14322	1	GS_11078	1
AgB03	7120249	7141277	AgB03_g432	+	Histone-lysine N-methyltransferase met-2, partial	N	N	N	N	ASU_12942	1	GS_15379,GS_18748,GS_20070	3
AgB03	7150681	7155026	AgB03_g433	+	n-terminal acetyltransferase b complex subunit naa25-like protein	Y	Y	Y	N
AgB03	7156539	7172925	AgB03_g434	+	Acetyltransferase B complex subunit NAA25	N	N	N	N	ASU_12941	1	GS_06419,GS_23284	2
AgB03	7189840	7206368	AgB03_g435	+	glycerate kinase	N	N	N	N	ASU_12940	1	GS_11160,GS_14701	2
AgB03	7207531	7207837	AgB03_g436	.	hypothetical protein	Y	Y	Y	N
AgB03	7207960	7208271	AgB03_g437	-	hypothetical protein	Y	Y	Y	N
AgB03	7208315	7209136	AgB03_g438	-	hypothetical protein	Y	Y	Y	N
AgB03	7261660	7285795	AgB03_g439	+	c-type lectin protein	N	N	N	N	ASU_03594,ASU_07171	2	GS_09050,GS_13492,GS_20276	3
AgB03	7217253	7284973	AgB03_g440	-	C-type lectin domain-containing protein 160	Y	Y	Y	N
AgB03	7221304	7307116	AgB03_g441	-	trypsin family protein	N	N	N	N	ASU_03592,ASU_03593,ASU_07170,ASU_14126	4	GS_00303,GS_02509,GS_07112,GS_17242,GS_20276,GS_20702,GS_24173	7
AgB03	7229096	7236970	AgB03_g442	-	hypothetical protein	Y	N	N	N			GS_01122	1
AgB03	7237230	7240526	AgB03_g443	+	hypothetical protein	Y	Y	Y	N
AgB03	7240705	7242249	AgB03_g444	.	hypothetical protein	Y	Y	Y	N
AgB03	7244504	7246055	AgB03_g445	+	trypsin family protein	Y	Y	Y	N
AgB03	7247495	7249457	AgB03_g446	+	trypsin family protein	Y	Y	Y	N
AgB03	7258235	7279718	AgB03_g447	-	C-type lectin domain-containing protein 160	Y	Y	Y	N
AgB03	7355012	7364314	AgB03_g448	-	Tyrosine-protein phosphatase Lar-like protein	N	N	N	N	ASU_14127	1	GS_13996	1
AgB03	7365035	7378880	AgB03_g449	+	Kelch repeat and BTB domain-containing protein	N	N	N	N	ASU_14128,ASU_14129	2	GS_03738,GS_08617,GS_22846	3
AgB03	7374439	7381962	AgB03_g450	-	Kelch repeat and BTB domain-containing protein	N	N	N	N	ASU_14129	1	GS_22846	1
AgB03	7382099	7397049	AgB03_g451	-	Ancient ubiquitous protein 1	N	N	N	N	ASU_07165,ASU_15095,ASU_15275	3	GS_02037	1
AgB03	7401140	7402724	AgB03_g452	+	hypothetical protein	N	N	N	N	ASU_07166	1	GS_11307	1
AgB03	7408838	7411232	AgB03_g453	-	hypothetical protein	N	N	N	N	ASU_07167	1	GS_08794	1
AgB03	7417246	7431483	AgB03_g454	+	Dynein heavy chain, cytoplasmic	N	Y	N	N	ASU_07168	1
AgB03	7433683	7437876	AgB03_g455	+	Dynein heavy chain, cytoplasmic	N	N	N	N	ASU_07169	1	GS_20821	1
AgB03	7486517	7489095	AgB03_g456	+	hypothetical protein	N	N	N	N	ASU_07169	1	GS_12666	1
AgB03	7489282	7520314	AgB03_g457	-	Ig-like and fibronectin type-III domain-containing protein, partial	N	N	N	N	ASU_14467	1	GS_03241,GS_21872	2
AgB03	7532496	7544013	AgB03_g458	-	GDP-L-fucose synthase	N	N	N	N	ASU_14538	1	GS_11792,GS_18083	2
AgB03	7544557	7554216	AgB03_g459	-	Ubiquitin-conjugating enzyme E2 L3	N	N	N	N	ASU_09482,ASU_14537	2	GS_03478,L3E_02991	2
AgB03	7546875	7553095	AgB03_g460	.	Ubiquitin-conjugating enzyme E2 L3	Y	Y	Y	N
AgB03	7558903	7563120	AgB03_g461	+	hypothetical protein	N	N	N	N	ASU_09483	1	GS_09327	1
AgB03	7581522	7589437	AgB03_g462	-	LINE-1 reverse transcriptase	N	N	N	N	ASU_09481	1	GS_15107	1
AgB03	7598080	7649109	AgB03_g463	-	Ligand-gated ion channel 4	N	N	N	N	ASU_09479	1	GS_01792	1
AgB03	7604454	7606379	AgB03_g464	+	ligand-gated ion channel 4	Y	Y	Y	N
AgB03	7658272	7669106	AgB03_g465	-	putative n-acetylgalactosaminyltransferase 9	N	N	N	N	ASU_09478	1	GS_11316,GS_19810,GS_21756	3
AgB03	7669901	7674714	AgB03_g466	-	Density-regulated protein	N	N	N	N	ASU_09477	1	GS_18353	1
AgB03	7677358	7691381	AgB03_g467	-	N-acetylgalactosaminyltransferase 9	N	N	N	N	ASU_09476	1	GS_13162	1
AgB03	7717036	7771906	AgB03_g468	+	Partitioning defective protein 3	N	N	N	N	ASU_09475	1	GS_01244,GS_01262,GS_11383,GS_20588	4
AgB03	7772837	7787136	AgB03_g469	+	hypothetical protein	N	N	N	N	ASU_09474	1	GS_02585,GS_07865	2
AgB03	7798166	7799195	AgB03_g470	+	Prefoldin subunit 5	Y	N	N	N			GS_20971,L3E_03047	2
AgB03	7798510	7814163	AgB03_g471	-	Palmitoyltransferase ZDHHC2	N	N	N	N	ASU_12167	1	GS_20971,L3E_03047	2
AgB03	7821274	7845166	AgB03_g472	+	e3 ubiquitin-protein ligase rnf13	N	N	N	N	ASU_12168	1	GS_07008	1
AgB03	7846169	7853397	AgB03_g473	+	F-box only protein 28	N	N	N	N	ASU_12169	1	GS_15742	1
AgB03	7862869	7877810	AgB03_g474	-	atp synthase lipid-binding protein	N	N	N	N	ASU_12170,ASU_12171,ASU_12172,ASU_12173	4	GS_04096,GS_14070	2
AgB03	7861397	7864651	AgB03_g475	+	ATP synthase lipid-binding protein, partial	N	N	N	N	ASU_12171	1	GS_22590	1
AgB03	7896275	7915028	AgB03_g476	+	acetyl-coenzyme a cytoplasmic	N	N	N	N	ASU_12174,ASU_12175	2	GS_12367,GS_23743	2
AgB03	7908885	7914121	AgB03_g477	-	Acetyl-coenzyme A synthetase	Y	Y	Y	N
AgB03	7914174	7926511	AgB03_g478	-	Acetyl-coenzyme A synthetase	N	N	N	N	ASU_12174	1	GS_07886,GS_12367	2
AgB03	7931354	7959621	AgB03_g479	-	breast cancer type 1 susceptibility protein-like protein	Y	Y	Y	N
AgB03	7935726	7942055	AgB03_g480	+	breast cancer type 1 susceptibility protein-like protein	N	N	N	N	ASU_14567,ASU_15395	2	GS_03173	1
AgB03	7964664	8038996	AgB03_g481	-	Dauer larva development regulatory growth factor daf-7, partial	N	N	N	N	ASU_12467,ASU_13526	2	GS_09987,GS_10278,GS_16977,GS_17022,GS_23445	5
AgB03	8070573	8072753	AgB03_g482	-	Sperm-specific class P protein 31	N	N	N	N	ASU_13527	1	GS_15017	1
AgB03	8066835	8073340	AgB03_g483	+	msp-domain protein 5	N	N	N	N	ASU_13527	1	GS_15017	1
AgB03	8085868	8101013	AgB03_g484	+	Mortality factor 4-like protein 1	N	N	N	N	ASU_13528	1	GS_20482,GS_21023	2
AgB03	8122021	8136725	AgB03_g485	+	Bridging integrator 2	N	N	N	N	ASU_13529	1	GS_01817	1
AgB03	8139016	8147649	AgB03_g486	-	Cuticle collagen 14	N	N	N	N	ASU_11604	1	GS_07041	1
AgB03	8147807	8155022	AgB03_g487	+	Elongation factor 1-beta/1-delta 1	N	N	N	N	ASU_11605	1	GS_12323	1
AgB03	8155417	8161600	AgB03_g488	+	ksr-1 enhancer	N	N	N	N	ASU_11606	1	GS_02899,GS_08140,GS_08896,GS_14296	4
AgB03	8178653	8185713	AgB03_g489	+	putative f-box protein	N	N	N	N	ASU_10222,ASU_11607	2	GS_23487	1
AgB03	8223322	8230950	AgB03_g490	+	hypothetical protein	N	N	N	N	ASU_10221	1	GS_12505	1
AgB03	8231077	8238712	AgB03_g491	+	hypothetical protein	Y	Y	Y	N
AgB03	8264841	8287099	AgB03_g492	+	hypothetical protein	Y	Y	Y	N
AgB03	8267540	8273037	AgB03_g493	+	UDP-glucuronosyltransferase ugt-47	N	Y	N	N	ASU_11953,ASU_11954	2
AgB03	8290930	8291779	AgB03_g494	.	general transcriptional corepressor trfA-like	Y	Y	Y	N
AgB03	8292514	8297216	AgB03_g495	+	hypothetical protein	N	Y	N	N	ASU_10220	1
AgB03	8298279	8314130	AgB03_g496	-	Long-chain-fatty-acid--CoA ligase 5	N	N	N	N	ASU_10219	1	GS_02741,GS_08749	2
AgB03	8316382	8338605	AgB03_g497	-	Long-chain-fatty-acid--CoA ligase 5, partial	N	N	N	N	ASU_10218,ASU_10219	2	GS_08061,GS_14202	2
AgB03	8340769	8353685	AgB03_g498	-	kinesin-like protein kif3a	N	N	N	N	ASU_10217	1	GS_19562	1
AgB03	8357984	8367042	AgB03_g499	-	Phosphatidylinositol-5-phosphate 4-kinase type-2 alpha	N	N	N	N	ASU_10216	1	GS_15702	1
AgB03	8374662	8389080	AgB03_g500	+	Synaptotagmin-1	N	N	N	N	ASU_15159	1	GS_22370	1
AgB03	8392319	8393393	AgB03_g501	.	Synaptotagmin-1	Y	Y	Y	N
AgB03	8399772	8400787	AgB03_g502	-	Elongation of very long chain fatty acids protein 6, partial	Y	Y	Y	N
AgB03	8400087	8400787	AgB03_g503	+	Elongation of very long chain fatty acids protein 6, partial	Y	Y	Y	N
AgB03	8401079	8406808	AgB03_g504	+	prion-like-domain-bearing protein family member (pqn-83)	N	N	N	N	ASU_14907	1	GS_12044,GS_15897	2
AgB03	8416100	8426840	AgB03_g505	+	hypothetical protein	N	N	N	N	ASU_13861	1	GS_05816,GS_09900,L4_05408	3
AgB03	8437858	8457850	AgB03_g506	-	lim and sh3 domain protein	N	N	N	N	ASU_13862,ASU_13863,ASU_15105	3	GS_04445,GS_09173,GS_17819,GS_23183	4
AgB03	8496264	8510795	AgB03_g507	-	hypothetical protein	N	N	N	N	ASU_13869	1	GS_00515,GS_19484	2
AgB03	8515627	8517109	AgB03_g508	-	Solute carrier organic anion transporter family member 4C1	Y	Y	Y	N
AgB03	8519381	8525441	AgB03_g509	-	Solute carrier organic anion transporter family member 4C1	N	Y	N	N	ASU_13870	1
AgB03	8537720	8544877	AgB03_g510	+	hypothetical protein	N	Y	N	N	ASU_07699	1
AgB03	8541765	8542163	AgB03_g511	.	hypothetical protein	Y	Y	Y	N
AgB03	8560043	8567003	AgB03_g512	+	WD repeat-containing protein 61	Y	Y	Y	N
AgB03	8550848	8567003	AgB03_g513	-	WD repeat-containing protein 61	Y	Y	Y	N
AgB04	10351	15890	AgB04_g001	+	Ribonucleoside-diphosphate reductase small chain	N	Y	N	N	ASU_14876	1
AgB04	16166	16661	AgB04_g002	.	hypothetical protein	Y	Y	Y	N
AgB04	38227	43106	AgB04_g003	.	Craniofacial development protein 2, partial	Y	Y	Y	N
AgB04	54993	59792	AgB04_g004	-	Guanosine-3',5'-bis(diphosphate) 3'-pyrophosphohydrolase MESH1	N	N	N	N	ASU_09654	1	GS_07616,GS_16807	2
AgB04	70432	75954	AgB04_g005	+	hypothetical protein	N	N	N	N	ASU_09653	1	GS_10991	1
AgB04	77788	88386	AgB04_g006	-	complement component c6	N	N	N	N	ASU_09652	1	GS_02855,GS_18503	2
AgB04	89838	100620	AgB04_g007	-	Beta-galactosidase	N	N	N	N	ASU_09651	1	GS_16464	1
AgB04	100799	103030	AgB04_g008	-	Beta-galactosidase	Y	Y	Y	N
AgB04	106332	127403	AgB04_g009	+	Beta-galactosidase	N	N	N	N	ASU_09650	1	GS_01108	1
AgB04	115945	116646	AgB04_g010	-	beta-galactosidase	Y	Y	Y	N
AgB04	136818	144710	AgB04_g011	+	Cytochrome P450 4C1	N	N	N	N	ASU_09649	1	GS_11362	1
AgB04	148469	158736	AgB04_g012	+	Regulator of microtubule dynamics protein 1	N	N	N	N	ASU_07226	1	GS_21877	1
AgB04	151815	167317	AgB04_g013	-	protein htrl	N	N	N	N	ASU_07227,ASU_07228	2	GS_23598	1
AgB04	212066	221532	AgB04_g014	-	D-glucuronyl C5-epimerase	Y	N	N	N			GS_09164	1
AgB04	250118	287229	AgB04_g015	+	Pleckstriny domain-containing family G member 7	N	N	N	N	ASU_14316,ASU_14317	2	GS_21372	1
AgB04	287514	304489	AgB04_g016	+	40S ribosomal protein S15	N	N	N	N	ASU_08502,ASU_08503	2	GS_01968,GS_02407	2
AgB04	297290	312687	AgB04_g017	-	V-type proton ATPase subunit d 1	N	N	N	N	ASU_08503	1	GS_01968,GS_02407	2
AgB04	323531	352025	AgB04_g018	+	Focal adhesion kinase 1	N	N	N	N	ASU_08504	1	GS_07424	1
AgB04	374714	379948	AgB04_g019	-	mitotic checkpoint serine threonine-protein kinase bub1	N	N	N	N	ASU_08506	1	GS_09664,GS_16433	2
AgB04	385084	400668	AgB04_g020	-	DnaJ subfamily A member 2	N	N	N	N	ASU_08507	1	GS_00701	1
AgB04	413742	426265	AgB04_g021	+	Isocitrate dehydrogenase NAD subunit gamma 1	N	N	N	N	ASU_08508,ASU_08509,ASU_15288	3	GS_08737,GS_17106,GS_19139,Liv_03722,Liv_04688	5
AgB04	427924	446883	AgB04_g022	-	e3 ubiquitin-protein ligase shprh	N	N	N	N	ASU_13340	1	GS_08118,GS_15198	2
AgB04	449002	459797	AgB04_g023	-	E3 ubiquitin-protein ligase SHPRH	N	N	N	N	ASU_13340	1	GS_15198	1
AgB04	467904	471364	AgB04_g024	+	group xv phospholipase a2	N	N	N	N	ASU_13338,ASU_13339	2	GS_06332,GS_13373	2
AgB04	459897	463218	AgB04_g025	-	RCC1 domain-containing protein 1	Y	N	N	N			GS_06332	1
AgB04	467942	476768	AgB04_g026	-	group xv phospholipase a2	N	N	N	N	ASU_13338,ASU_13339	2	GS_13373	1
AgB04	483327	499916	AgB04_g027	-	Transcriptional regulator ATRX	Y	N	N	N			GS_19823	1
AgB04	501361	518953	AgB04_g028	-	Transcriptional regulator ATRX	Y	N	N	N			GS_19823	1
AgB04	524503	539484	AgB04_g029	+	Zinc finger CCCH domain-containing protein 15	N	N	N	N	ASU_12343	1	GS_24290	1
AgB04	638406	653084	AgB04_g030	+	low-density lipoprotein receptor-related protein	N	N	N	N	ASU_11577,ASU_12460	2	GS_21443,GS_23607	2
AgB04	655072	655236	AgB04_g031	.	Low-density lipoprotein receptor-related protein	Y	Y	Y	N
AgB04	655418	658192	AgB04_g032	+	Low-density lipoprotein receptor-related protein	Y	Y	Y	N
AgB04	658340	658662	AgB04_g033	.	low-density lipoprotein receptor-related protein	Y	Y	Y	N
AgB04	659562	677601	AgB04_g034	+	Low-density lipoprotein receptor-related protein	Y	N	N	N			GS_21443	1
AgB04	679515	686477	AgB04_g035	-	hypothetical protein	N	N	N	N	ASU_11578	1	GS_08585	1
AgB04	695754	699871	AgB04_g036	+	hypothetical protein	N	N	N	N	ASU_11579	1	GS_16026	1
AgB04	703611	707583	AgB04_g037	-	phosphoglycerate mutase family protein	N	N	N	N	ASU_11580	1	GS_02979	1
AgB04	711111	718883	AgB04_g038	-	phosphoglycerate mutase family protein	N	N	N	N	ASU_11581	1	GS_07789	1
AgB04	732218	737802	AgB04_g039	+	Guanine nucleotide-binding protein alpha-3 subunit, partial	N	Y	N	N	ASU_08188	1
AgB04	761766	773308	AgB04_g040	+	trypsin inhibitor	N	N	N	N	ASU_08187	1	GS_12079,GS_13544	2
AgB04	769040	777126	AgB04_g041	-	trypsin inhibitor	N	N	N	N	ASU_08185	1	GS_13544,GS_19055	2
AgB04	788293	791271	AgB04_g042	+	Segmentation protein Runt	N	N	N	N	ASU_08184	1	GS_22836	1
AgB04	787480	790104	AgB04_g043	-	Segmentation protein Runt	N	N	N	N	ASU_08184	1	GS_22836	1
AgB04	796510	812766	AgB04_g044	-	retinoblastoma-like protein 2	N	N	N	N	ASU_08183	1	GS_05380,GS_10898,GS_15876	3
AgB04	816792	827117	AgB04_g045	-	Ras GTPase-activating-like protein	N	N	N	N	ASU_08182	1	GS_19021	1
AgB04	828587	846941	AgB04_g046	-	Ras GTPase-activating-like protein	N	N	N	N	ASU_08182	1	GS_20947,GS_23085	2
AgB04	829383	832414	AgB04_g047	+	Ras GTPase-activating-like protein	Y	Y	Y	N
AgB04	850460	867580	AgB04_g048	-	hypothetical protein	N	Y	N	N	ASU_08181	1
AgB04	875729	888154	AgB04_g049	-	Zinc transporter 5	N	N	N	N	ASU_08180	1	GS_00516	1
AgB04	889200	890592	AgB04_g050	.	hypothetical protein	Y	Y	Y	N
AgB04	907264	938415	AgB04_g051	+	Gamma-tubulin complex component 3	N	N	N	N	ASU_12103,ASU_12104,ASU_12105	3	GS_01574,GS_13153,GS_13517	3
AgB04	893027	905979	AgB04_g052	-	PHD finger-like domain-containing protein 5A	Y	Y	Y	N
AgB04	928180	942583	AgB04_g053	-	Zinc finger A20 and AN1 domain-containing stress-associated protein 4	N	N	N	N	ASU_12103	1	GS_01574	1
AgB04	989203	1005903	AgB04_g054	-	phosphatidylinositide phosphatase sac1-b	N	N	N	N	ASU_12102	1	GS_15124,GS_23286	2
AgB04	1025020	1034576	AgB04_g055	+	ELL-associated factor 2	N	N	N	N	ASU_09268	1	GS_01659	1
AgB04	1038149	1043146	AgB04_g056	-	gp53	N	N	N	N	ASU_09269,ASU_09270	2	GS_02311,GS_09046	2
AgB04	1045303	1048218	AgB04_g057	-	hypothetical protein	N	N	N	N	ASU_09271	1	GS_15492,GS_22153	2
AgB04	1053032	1090612	AgB04_g058	-	FH1/FH2 domain-containing protein 3	N	N	N	N	ASU_09272	1	GS_12662	1
AgB04	1082185	1083739	AgB04_g059	.	hypothetical protein	Y	Y	Y	N
AgB04	1142196	1159540	AgB04_g060	+	dna replication factor cdt1	N	N	N	N	ASU_09273	1	GS_06878,GS_21326	2
AgB04	1155508	1161488	AgB04_g061	-	ferric-chelate reductase 1	N	N	N	N	ASU_09274	1	GS_09642	1
AgB04	1203250	1223689	AgB04_g062	-	sulfate permease family protein 3	N	N	N	N	ASU_04607,ASU_09275	2	GS_00322	1
AgB04	1227206	1234679	AgB04_g063	+	Cytosolic iron-sulfur protein assembly protein	N	Y	N	N	ASU_04606	1
AgB04	1256987	1276965	AgB04_g064	+	RdRP1	N	N	N	N	ASU_04600,ASU_04601,ASU_04602,ASU_04603,ASU_04604,ASU_04605	6	GS_06317,GS_14742,GS_23576	3
AgB04	1291844	1293052	AgB04_g065	+	Retrovirus-related Pol polyprotein from type-1 retrotransposable element R2	Y	Y	Y	N
AgB04	1296522	1310291	AgB04_g066	+	Innexin-3	N	N	N	N	ASU_04599	1	GS_10236,GS_20257	2
AgB04	1313232	1317181	AgB04_g067	-	hypothetical protein	Y	Y	Y	N
AgB04	1318368	1323335	AgB04_g068	-	Innexin-3	Y	Y	Y	N
AgB04	1328783	1331729	AgB04_g069	-	hypothetical protein	N	N	N	N	ASU_04598	1	GS_02421,GS_07802	2
AgB04	1349446	1352008	AgB04_g070	-	Aryl hydrocarbon receptor protein 1	N	N	N	N	ASU_04597	1	GS_03913	1
AgB04	1352758	1368478	AgB04_g071	-	Aryl hydrocarbon receptor protein 1	N	Y	N	N	ASU_04596	1
AgB04	1369435	1380729	AgB04_g072	+	uncoordinated protein 58	N	N	N	N	ASU_04595,ASU_04596	2	GS_18220,GS_23565	2
AgB04	1378857	1394881	AgB04_g073	-	uncoordinated protein 58	N	N	N	N	ASU_04593,ASU_04594	2	GS_00573,GS_02103,GS_18220	3
AgB04	1400075	1408820	AgB04_g074	-	hypothetical protein	N	N	N	N	ASU_04592	1	GS_20184	1
AgB04	1418833	1445582	AgB04_g075	-	Chromodomain-helicase-DNA-binding protein 1	N	N	N	N	ASU_04590	1	GS_00285,GS_00873,GS_06308,GS_10725	4
AgB04	1419783	1421418	AgB04_g076	+	Chromodomain-helicase-DNA-binding protein 1	Y	Y	Y	N
AgB04	1427019	1438917	AgB04_g077	+	EH domain-containing protein 4	N	N	N	N	ASU_04591	1	GS_23133	1
AgB04	1449063	1450113	AgB04_g078	-	Eukaryotic translation initiation factor 5	Y	Y	Y	N
AgB04	1451641	1456551	AgB04_g079	-	Chromodomain-helicase-DNA-binding protein 1	Y	N	N	N			GS_21216	1
AgB04	1457748	1477234	AgB04_g080	-	Protein disulfide-isomerase A3	N	N	N	N	ASU_04589	1	GS_03297	1
AgB04	1488217	1509048	AgB04_g081	+	Ubiquilin-1	N	N	N	N	ASU_04588	1	GS_22946	1
AgB04	1575325	1577529	AgB04_g082	-	hypothetical protein	Y	Y	Y	N
AgB04	1588961	1642531	AgB04_g083	+	Homeotic protein spalt-major	N	N	N	N	ASU_04587	1	GS_00836,GS_06805,GS_23048	3
AgB04	1652331	1666005	AgB04_g084	+	Beta-glucuronidase	N	N	N	N	ASU_04586	1	GS_20312	1
AgB04	1669588	1681104	AgB04_g085	+	beta-glucuronidase	N	N	N	N	ASU_04586	1	GS_20312	1
AgB04	1690595	1724060	AgB04_g086	+	trypsin family protein	N	Y	N	N	ASU_03425,ASU_04585	2
AgB04	1733719	1748680	AgB04_g087	-	Molybdopterin synthase catalytic subunit	N	N	N	N	ASU_03426	1	GS_10781	1
AgB04	1753263	1761816	AgB04_g088	-	hypothetical protein	N	N	N	N	ASU_03427	1	GS_21692	1
AgB04	1762986	1767537	AgB04_g089	-	hypothetical protein	N	N	N	N	ASU_03427	1	GS_18831	1
AgB04	1768675	1776814	AgB04_g090	-	hypothetical protein	Y	Y	Y	N
AgB04	1779312	1788416	AgB04_g091	-	d-2-hydroxyglutarate	N	N	N	N	ASU_03429,ASU_03430,ASU_03431	3	GS_02888,GS_10854,GS_13629,GS_22013	4
AgB04	1811238	1840806	AgB04_g092	-	General receptor for phosphoinositides 1-associated scaffold protein	N	N	N	N	ASU_03432,ASU_03433	2	GS_00252,GS_07166,GS_10325,GS_17258,GS_24105	5
AgB04	1859732	1861034	AgB04_g093	.	hypothetical protein	Y	Y	Y	N
AgB04	1881480	1907368	AgB04_g094	-	Brefeldin A-inhibited guanine nucleotide-exchange protein 2	N	N	N	N	ASU_03434	1	GS_09098	1
AgB04	1909315	1917894	AgB04_g095	-	Brefeldin A-inhibited guanine nucleotide-exchange protein 2	N	N	N	N	ASU_03434	1	GS_09098	1
AgB04	1923848	1955197	AgB04_g096	-	hypothetical protein	N	N	N	N	ASU_03435	1	GS_09330	1
AgB04	1955294	1955800	AgB04_g097	.	hypothetical protein	Y	Y	Y	N
AgB04	1961815	1962187	AgB04_g098	.	hypothetical protein	Y	Y	Y	N
AgB04	1964916	1986475	AgB04_g099	-	hypothetical protein	N	N	N	N	ASU_03436	1	GS_00360,GS_06800,GS_19335	3
AgB04	2005258	2022103	AgB04_g100	+	TPA_inf: eukaryotic translation elongation factor 1A	N	N	N	N	ASU_03437,ASU_14931	2	GS_16291,GS_20000	2
AgB04	2011783	2014571	AgB04_g101	-	TPA_inf: eukaryotic translation elongation factor 1A	N	N	N	N	ASU_03437	1	GS_16291	1
AgB04	2023621	2029499	AgB04_g102	+	hypothetical protein	N	Y	N	N	ASU_14932	1
AgB04	2030812	2035057	AgB04_g103	-	40S ribosomal protein S17, partial	N	N	N	N	ASU_13664,ASU_14933	2	GS_19261	1
AgB04	2037287	2040694	AgB04_g104	-	Probable mitochondrial pyruvate carrier 2	N	N	N	N	ASU_03438	1	GS_22511	1
AgB04	2044058	2045148	AgB04_g105	+	hypothetical protein	Y	Y	Y	N
AgB04	2044534	2051821	AgB04_g106	-	Probable mitochondrial pyruvate carrier 2	N	N	N	N	ASU_03438	1	GS_17387	1
AgB04	2055486	2060917	AgB04_g107	-	Probable mitochondrial pyruvate carrier 2	N	N	N	N	ASU_03439	1	GS_00311	1
AgB04	2069194	2076968	AgB04_g108	-	Ras-related protein Rab-2, partial	N	N	N	N	ASU_03440	1	GS_07144	1
AgB04	2084304	2106790	AgB04_g109	-	hypothetical protein	N	N	N	N	ASU_03441	1	GS_13979	1
[truncated: 16,026 more rows]
