# Supplementary material for: Comparative genome analysis of programmed DNA elimination in nematodes
Source: HighWire-hosted journal article supplement (doi:10.1101/gr.225730.117), 2017-11-08
Supplement: Supplemental_Table_S8.xlsx [file Supplemental_Table_S8.xlsx]

## Sheet: synteny and gene conservation
Organism	Nematode Clade	Assembled Genome Size (Mb)	N50 of the Genome (Mb)	Conserved Blocks in Size (Mb)	Conserved Blocks in Size (%)	Conserved Blocks in Ascaris (Mb)	Conserved Blocks in Ascaris (%)	Total Genes	Conserved Genes	Conserved Genes (%)	Conserved Genes in Ascaris	Conserved Genes in Ascaris (%)
Ascaris suum	III	298	4.6	298	1	298	1	18025	18025	1	18025	1
Parascaris univalens	III	253	1.8	221.4	0.875099	256	0.85906	15018	11745	0.782062	12751	0.707406
Toxocara canis	III	317	0.4	217	0.684543	207.7	0.69698	18596	13838	0.744139	13158	0.729986
Brugia malayi	III	88	14.2	50.9	0.578409	99.5	0.333893	13439	10322	0.768063	10659	0.591345
Onchocerca volvulus	III	96	25.5	37.2	0.3875	73.5	0.246644	12225	8272	0.676646	10597	0.587906
Loa loa	III	91	0.2	28.7	0.315385	60.5	0.20302	12473	9086	0.728453	10269	0.569709
Caenorhabditis elegans	V	100	17.5	19.8	0.198	24.4	0.0818792	20251	10659	0.526344	9905	0.549515
Pristionchus pacificus	V	172	1.2	11.6	0.0674419	17	0.057047	24217	10604	0.437874	9119	0.505908
Strongyloides ratti	IV	43	11.7	17.1	0.397674	21.4	0.0718121	12468	8255	0.662095	9161	0.508239
Trichinella spiralis	I	63	6.4	1	0.015873	1.4	0.00469799	16380	6315	0.385531	7125	0.395284
