# Supplementary material for: Comparative genome analysis of programmed DNA elimination in nematodes
Source: HighWire-hosted journal article supplement (doi:10.1101/gr.225730.117), 2017-11-08
Supplement: Supplemental_Table_S9.xlsx [file Supplemental_Table_S9.xlsx]

## Sheet: orthologous groups
Orthologous group name	Ascaris gene #	Parascaris gene #	Toxocara gene #	C. elegans gene #	Genes in the group
1	1	1	1	68	cel|CE_C17E7.1 cel|CE_F16B4.11a cel|CE_F16B4.12a cel|CE_F16B4.1a cel|CE_F31F4.12 cel|CE_F36D3.2 cel|CE_F41B5.10 cel|CE_F41B5.9 cel|CE_F44C8.10 cel|CE_F44C8.11 cel|CE_F44C8.2 cel|CE_F44C8.3 cel|CE_F44C8.4 cel|CE_F44C8.5b cel|CE_F44C8.6a cel|CE_F44C8.8a cel|CE_F44C8.9a cel|CE_F48G7.11a cel|CE_F57G8.6 cel|CE_F59E11.10a cel|CE_F59E11.11 cel|CE_F59E11.8a cel|CE_M02H5.1 cel|CE_M02H5.3 cel|CE_M02H5.4a c…
2	16	12	20	9	asu|AgB07_g218_t01 asu|AgR002_g097_t01 asu|AgR006_g226_t01 asu|AgR023_g152_t06 asu|AgB07_g219_t01 asu|AgR004_g246_t01 asu|AgR006_g223_t01 asu|AgR004_g245_t04 asu|AgR004_g250_t01 asu|AgR004_g247_t01 asu|AgR004_g251_t01 asu|AgR006_g198_t01 asu|AgR040X_g053_t01 cel|CE_F11C3.3 cel|CE_F20G4.3 cel|CE_F45G2.2a cel|CE_F52B10.1 cel|CE_F58G4.1 cel|CE_K12F2.1 cel|CE_R06C7.10 cel|CE_T18D3.4 cel|CE_Y11D7A.14 …
3	2	2	1	51	cel|CE_AC3.7 cel|CE_AC3.8 cel|CE_C08F11.8 cel|CE_C10H11.3 cel|CE_C10H11.4 cel|CE_C10H11.5 cel|CE_C10H11.6a cel|CE_C13D9.9 cel|CE_C17G1.3a cel|CE_C23G10.6 cel|CE_C32C4.7 cel|CE_C33A12.6a cel|CE_C35A5.2 cel|CE_C49A9.8 cel|CE_F01D4.1a cel|CE_F01D4.2 cel|CE_F09G2.6 cel|CE_F10D2.11 cel|CE_F10D2.2a cel|CE_F10D2.5 cel|CE_F10D2.6 cel|CE_F10D2.7 cel|CE_F29F11.2 cel|CE_F31F4.7 cel|CE_F47C10.6 cel|CE_H23N18…
4	9	9	12	13	asu|AgB01_g256_t04 asu|AgR004_g392_t02 asu|AgR067_g008_t02 asu|AgB03_g189_t01 asu|AgR011_g279_t03 asu|AgR016_g207_t01 asu|AgR009X_g026_t03 asu|AgR009X_g036_t05 cel|CE_C05A9.1a cel|CE_C34G6.4a cel|CE_C47A10.1 cel|CE_F22E10.1 cel|CE_F22E10.2 cel|CE_F22E10.3 cel|CE_F42E11.1a cel|CE_K08E7.9 cel|CE_T21E8.1a cel|CE_T21E8.2 cel|CE_T21E8.3 cel|CE_ZK455.7 cel|CE_DH11.3 pun|PgB01_g089_t01 pun|PgB04_g139_t0…
5	18	10	10	2	asu|AgB01_g587_t09 asu|AgB03_g271_t01 asu|AgB06_g109_t03 asu|AgR011_g133_t01 asu|AgR024_g150_t06 asu|AgR052_g036_t02 asu|AgR058_g002_t03 asu|AgB06_g112_t06 asu|AgB26_g020_t03 asu|AgR024_g140_t01 asu|AgR024_g149_t03 asu|AgR040X_g076_t01 asu|AgR011_g037_t01 asu|AgR024_g142_t02 asu|AgR040X_g079_t01 cel|CE_D2096.3 cel|CE_R05F9.12 pun|PgB03_g088_t01 pun|PgB03_g090_t02 pun|PgR007_g176_t05 pun|PgR007_g1…
6	3	1	1	32	asu|AgE02_g015_t02 asu|AgE02_g017_t01 asu|AgE02_g037_t01 cel|CE_C04G2.4 cel|CE_C09B9.6 cel|CE_C33F10.9 cel|CE_C34F11.4 cel|CE_C34F11.6 cel|CE_F26G1.7 cel|CE_F32B6.6 cel|CE_F36H12.7 cel|CE_F58A6.8 cel|CE_K05F1.2 cel|CE_K05F1.7 cel|CE_K07F5.1 cel|CE_K07F5.2 cel|CE_K07F5.3 cel|CE_K08F4.8 cel|CE_R05F9.13 cel|CE_R05F9.3 cel|CE_R05F9.8 cel|CE_R13H9.2 cel|CE_R13H9.4 cel|CE_T13F2.10 cel|CE_T13F2.11 cel|C…
7	8	9	9	9	asu|AgB01_g581_t01 asu|AgB06_g009_t04 asu|AgR003_g267_t01 asu|AgR025_g102_t06 asu|AgR029_g066_t04 asu|AgE01_g014_t01 cel|CE_C44B11.3 cel|CE_C47B2.3 cel|CE_F16D3.1 cel|CE_F26E4.8a cel|CE_F32H2.9 cel|CE_F40F4.5 cel|CE_F44F4.11 cel|CE_T28D6.2 cel|CE_ZK899.4 pun|PgB02X_g211_t01 pun|PgB03_g163_t02 pun|PgE007_g001_t01 pun|PgE274_g001_t02 pun|PgR016_g119_t09 pun|PgR030_g044_t01 pun|PgR053_g042_t01 pun|P…
8	12	9	13	1	asu|AgB02_g123_t04 asu|AgR001_g592_t03 asu|AgR001_g599_t01 asu|AgR001_g607_t01 asu|AgR004_g362_t04 asu|AgR016_g112_t05 asu|AgR016_g128_t05 asu|AgR016_g187_t02 asu|AgR016_g222_t04 asu|AgR047_g062_t01 asu|AgR016_g141_t01 asu|AgR047_g061_t01 pun|PgR011_g112_t01 pun|PgR011_g130_t03 pun|PgR022X_g021_t03 pun|PgR022X_g023_t03 pun|PgR064_g005_t07 pun|PgR064_g018_t06 pun|PgR064_g022_t09 pun|PgR064_g030_t0…
9	7	9	14	5	asu|AgB13X_g040_t01 asu|AgR001_g208_t01 asu|AgR001_g212_t04 asu|AgR015_g018_t01 asu|AgR053_g011_t02 asu|AgR268_g001_t01 cel|CE_M03F4.2a cel|CE_T04C12.4 cel|CE_T04C12.5 cel|CE_T04C12.6 cel|CE_T25C8.2 pun|PgB03_g050_t01 pun|PgB03_g053_t01 pun|PgB16_g013_t10 pun|PgR020_g014_t01 pun|PgR037_g109_t01 pun|PgR070_g023_t01 pun|PgR100X_g009_t01 pun|PgR145_g003_t03 pun|PgR195X_g002_t07 tca|Tcan_09412.1 tca|…
10	2	3	7	17	asu|AgB03_g236_t01 asu|AgB03_g237_t01 cel|CE_B0035.7 cel|CE_C50F4.13 cel|CE_F07B7.10 cel|CE_F07B7.3 cel|CE_F08G2.2 cel|CE_F17E9.13 cel|CE_F35H10.1 cel|CE_F45F2.4 cel|CE_F54E12.5a cel|CE_F55G1.10 cel|CE_H02I12.7 cel|CE_K06C4.11 cel|CE_K06C4.3 cel|CE_T10C6.12 cel|CE_T23D8.6 cel|CE_ZK131.10 cel|CE_ZK131.6 pun|PgR052_g007_t01 pun|PgR052_g010_t01 tca|Tcan_02260.1 tca|Tcan_02345.1 tca|Tcan_12693.1 tca|…
11	2	5	6	16	asu|AgB06_g136_t01 asu|AgR046_g064_t02 cel|CE_B0035.9 cel|CE_C50F4.7 cel|CE_F07B7.9 cel|CE_F17E9.12 cel|CE_F22B3.1 cel|CE_F45F2.3 cel|CE_F54E12.3 cel|CE_F55G1.11 cel|CE_K03A1.6 cel|CE_K06C4.10 cel|CE_K06C4.2 cel|CE_T10C6.14 cel|CE_T23D8.5 cel|CE_ZK131.1 cel|CE_ZK131.4 cel|CE_ZK131.8 pun|PgR012_g131_t01 pun|PgR042_g096_t01 pun|PgR042_g097_t01 pun|PgR052_g009_t01 tca|Tcan_03156.1 tca|Tcan_14259.1 t…
12	6	7	11	5	asu|AgR012_g157_t01 asu|AgR022_g058_t01 asu|AgR022_g060_t06 asu|AgR021X_g089_t01 asu|AgR021X_g091_t02 cel|CE_C41D7.2 cel|CE_K07A3.2a cel|CE_F44F4.4 cel|CE_ZK270.1 pun|PgR003_g112_t03 pun|PgR003_g127_t02 pun|PgR003_g128_t02 pun|PgR016_g016_t02 tca|Tcan_03745.1 tca|Tcan_03753.1 tca|Tcan_05952.1 tca|Tcan_10935.1 tca|Tcan_10946.1 tca|Tcan_10953.1 tca|Tcan_10958.1 tca|Tcan_03767.1 tca|Tcan_10230.1 tca…
13	9	5	12	2	asu|AgB15X_g042_t01 asu|AgR003_g150_t01 asu|AgR009X_g318_t07 asu|AgR014X_g109_t01 asu|AgR009X_g018_t01 asu|AgR009X_g019_t01 asu|AgR009X_g020_t01 asu|AgR009X_g021_t01 asu|AgR022_g213_t01 pun|PgB02X_g099_t01 pun|PgR042_g099_t01 pun|PgR063X_g024_t01 pun|PgR063X_g025_t01 tca|Tcan_05686.1 tca|Tcan_05761.1 tca|Tcan_11029.1 tca|Tcan_11189.1 tca|Tcan_11193.1 tca|Tcan_11194.1 tca|Tcan_11199.1 tca|Tcan_112…
14	4	1	8	13	asu|AgR004_g159_t01 asu|AgR004_g216_t02 asu|AgR021X_g190_t01 cel|CE_AH6.1 cel|CE_B0024.6a cel|CE_C17F4.6 cel|CE_F21H7.9 cel|CE_F23H12.6 cel|CE_F52E1.4a cel|CE_R134.1 cel|CE_R134.2 cel|CE_T03D8.5a cel|CE_W03F11.2a cel|CE_ZC412.2 cel|CE_ZK970.5 cel|CE_ZK970.6 tca|Tcan_07272.1 tca|Tcan_07766.1 tca|Tcan_17765.1 tca|Tcan_07770.1 tca|Tcan_07771.1 tca|Tcan_17763.1 tca|Tcan_07780.1 tca|Tcan_11848.1 asu|A…
15	1	2	7	16	cel|CE_B0035.8 cel|CE_C50F4.5 cel|CE_F07B7.11 cel|CE_F07B7.4 cel|CE_F08G2.1 cel|CE_F17E9.9 cel|CE_F35H10.11 cel|CE_F45F2.12 cel|CE_F54E12.4 cel|CE_F55G1.3 cel|CE_H02I12.6 cel|CE_K06C4.12 cel|CE_K06C4.4 cel|CE_T10C6.11 cel|CE_ZK131.5 cel|CE_ZK131.9 tca|Tcan_02032.1 tca|Tcan_02346.1 tca|Tcan_10711.1 tca|Tcan_12692.1 tca|Tcan_12709.1 tca|Tcan_18215.1 asu|AgR003_g429_t02 pun|PgR012_g086_t01 tca|Tcan_…
16	1	3	2	20	cel|CE_C01G12.5 cel|CE_C06B8.3 cel|CE_C06E4.3 cel|CE_C06E4.6 cel|CE_D1054.8 cel|CE_F02C12.2 cel|CE_F12E12.11 cel|CE_F25D1.5 cel|CE_F26D2.15 cel|CE_F28H7.2 cel|CE_R05D8.10 cel|CE_R05D8.7 cel|CE_R05D8.8 cel|CE_R05D8.9 cel|CE_R08H2.1 cel|CE_T01G6.1 cel|CE_T01G6.10 cel|CE_W03F9.9 cel|CE_ZK829.1 cel|CE_F12E12.12 asu|AgR028_g116_t07 pun|PgR112_g015_t02 tca|Tcan_16403.1 pun|PgR019_g090_t01 tca|Tcan_0356…
17	1	1	1	23	cel|CE_F21H7.1 cel|CE_F37B1.1 cel|CE_F37B1.2 cel|CE_F37B1.3 cel|CE_F37B1.4 cel|CE_F37B1.5 cel|CE_F37B1.8 cel|CE_Y1H11.1 cel|CE_Y1H11.2 cel|CE_Y53F4B.29 cel|CE_Y53F4B.30 cel|CE_Y53F4B.31 cel|CE_Y53F4B.32 cel|CE_Y53F4B.33 cel|CE_Y53F4B.35 cel|CE_Y53F4B.37 cel|CE_ZK697.6a cel|CE_F37B1.7 cel|CE_K08F4.11 cel|CE_K08F4.7 cel|CE_Y32G9A.1 cel|CE_F37B1.6 cel|CE_K08F4.6 asu|AgR030_g090_t01 pun|PgR024_g121_t…
18	5	7	8	5	asu|AgB01_g251_t03 asu|AgB01_g252_t02 asu|AgB02_g235_t03 asu|AgE31_g003_t01 asu|AgR043_g091_t01 cel|CE_B0272.1 cel|CE_C36E8.5 cel|CE_C54C6.2 cel|CE_K01G5.7 cel|CE_ZK154.3 pun|PgB04_g135_t01 pun|PgB04_g136_t01 pun|PgB10_g062_t02 pun|PgE153_g002_t01 pun|PgR003_g161_t05 pun|PgR007_g022_t01 pun|PgR045_g070_t01 tca|Tcan_03365.1 tca|Tcan_06249.1 tca|Tcan_06255.1 tca|Tcan_09801.1 tca|Tcan_13288.1 tca|Tc…
19	7	5	8	5	asu|AgB03_g142_t01 asu|AgR003_g242_t05 asu|AgR031_g128_t06 asu|AgB16X_g008_t02 asu|AgE06_g018_t05 asu|AgR004_g146_t01 asu|AgR018X_g110_t01 cel|CE_B0365.3 cel|CE_C01G12.8 cel|CE_C09H5.2a cel|CE_C02E7.1a cel|CE_Y105E8A.12a pun|PgB06_g017_t01 pun|PgR030_g018_t01 pun|PgE016_g004_t02 pun|PgR032X_g016_t01 pun|PgR081_g016_t08 tca|Tcan_04894.1 tca|Tcan_04897.1 tca|Tcan_12779.1 tca|Tcan_16688.1 tca|Tcan_1…
20	6	4	6	7	asu|AgB02_g432_t02 asu|AgB05_g277_t01 asu|AgB23_g008_t02 asu|AgR004_g150_t01 asu|AgR016_g134_t01 asu|AgR033_g090_t17 cel|CE_C12C8.1 cel|CE_C15H9.6a cel|CE_F26D10.3 cel|CE_F43E2.8a cel|CE_F44E5.4 cel|CE_F44E5.5 cel|CE_C37H5.8 pun|PgB01_g163_t02 pun|PgR033_g085_t01 pun|PgR081_g013_t01 pun|PgR129_g003_t10 tca|Tcan_04352.1 tca|Tcan_16685.1 tca|Tcan_18846.1 tca|Tcan_18483.1 tca|Tcan_18487.1 tca|Tcan_1…
21	1	3	1	18	cel|CE_C03G6.10 cel|CE_C03G6.12a cel|CE_C03G6.8 cel|CE_C12D5.2a cel|CE_C13C4.1 cel|CE_C50B6.14a cel|CE_C50B6.8a cel|CE_F07C3.10 cel|CE_F09C6.9 cel|CE_F25E5.6 cel|CE_F57A10.5 cel|CE_R02C2.4a cel|CE_R07B7.16 cel|CE_T24A6.8a cel|CE_T24A6.9a cel|CE_C13C4.2 cel|CE_C13C4.3 cel|CE_C56E10.1 pun|PgR002_g189_t01 pun|PgR002_g190_t01 asu|AgB01_g125_t01 pun|PgR002_g188_t04 tca|Tcan_11828.1
22	8	5	8	1	asu|AgB01_g330_t02 asu|AgB03_g496_t04 asu|AgB03_g497_t02 asu|AgB07_g301_t04 asu|AgE49_g005_t02 asu|AgR064_g018_t01 pun|PgB10_g013_t02 pun|PgR099_g002_t03 pun|PgR099_g003_t01 pun|PgR137_g001_t01 pun|PgR137_g002_t01 tca|Tcan_04615.1 tca|Tcan_09362.1 tca|Tcan_10498.1 tca|Tcan_10516.1 tca|Tcan_17195.1 tca|Tcan_17201.1 tca|Tcan_10476.1 tca|Tcan_10496.1 cel|CE_Y65B4BL.5a asu|AgB17_g100_t06 asu|AgR031_g…
23	5	5	5	5	asu|AgB01_g553_t01 asu|AgR005_g108_t11 asu|AgR005_g291_t12 asu|AgR016_g122_t07 cel|CE_F10C1.2a cel|CE_F38B2.1a cel|CE_F52E10.5 cel|CE_K05B2.3 cel|CE_W10G6.3 pun|PgR007_g106_t04 pun|PgR010_g157_t01 pun|PgR015_g070_t01 pun|PgR064_g010_t01 pun|PgR129_g010_t01 tca|Tcan_05317.1 tca|Tcan_11063.1 tca|Tcan_12338.1 tca|Tcan_17230.1 tca|Tcan_09686.1 asu|AgR033_g084_t01
24	7	6	5	2	asu|AgR004_g173_t01 asu|AgR022_g135_t03 asu|AgR005_g365_t01 asu|AgR034_g085_t01 asu|AgR043_g008_t04 asu|AgR028_g078_t01 asu|AgR028_g093_t01 cel|CE_C02C2.1 cel|CE_K08E3.1 pun|PgR003_g060_t03 pun|PgR019_g001_t01 pun|PgR054_g038_t02 pun|PgR003_g183_t01 pun|PgR048_g047_t02 tca|Tcan_03221.1 tca|Tcan_08055.1 tca|Tcan_09182.1 tca|Tcan_11805.1 tca|Tcan_13418.1 pun|PgR007_g171_t01
25	7	4	5	3	asu|AgB02_g168_t01 asu|AgB07_g082_t01 cel|CE_H16O14.1a cel|CE_R13A1.2a cel|CE_K02A2.3 pun|PgR017X_g096_t01 pun|PgR040_g045_t02 pun|PgR041_g020_t03 pun|PgR146_g002_t04 tca|Tcan_03045.1 tca|Tcan_07062.1 tca|Tcan_03055.1 tca|Tcan_09998.1 asu|AgR002_g365_t03 asu|AgR006_g216_t01 asu|AgR010_g205_t02 tca|Tcan_07949.1 asu|AgR010_g207_t01 asu|AgR027X_g038_t01
26	4	7	6	2	asu|AgB06_g102_t04 asu|AgB06_g103_t01 asu|AgB11_g025_t03 asu|AgR005_g408_t02 cel|CE_F54D1.6 cel|CE_R09E10.5 pun|PgB03_g092_t07 pun|PgB03_g095_t04 pun|PgR007_g196_t01 pun|PgR042_g036_t01 pun|PgR309_g001_t06 pun|PgR042_g037_t01 tca|Tcan_03035.1 tca|Tcan_14878.1 tca|Tcan_15452.1 tca|Tcan_16303.1 tca|Tcan_16309.1 tca|Tcan_14879.1 pun|PgE313_g001_t01
27	6	6	6	1	asu|AgB10_g124_t01 asu|AgB10_g192_t01 asu|AgB11_g050_t02 asu|AgR030_g103_t02 asu|AgR047_g032_t02 asu|AgR049_g022_t01 pun|PgR006_g043_t03 pun|PgR012_g061_t04 pun|PgR042_g061_t02 pun|PgR059_g040_t01 pun|PgR090_g003_t01 pun|PgR091_g036_t01 tca|Tcan_03259.1 tca|Tcan_03811.1 tca|Tcan_04260.1 tca|Tcan_09428.1 tca|Tcan_16245.1 tca|Tcan_18457.1 cel|CE_ZK829.4
28	1	1	2	15	cel|CE_B0035.10 cel|CE_F07B7.5 cel|CE_F08G2.3 cel|CE_F17E9.10 cel|CE_F22B3.2 cel|CE_F45F2.13 cel|CE_F54E12.1 cel|CE_F55G1.2 cel|CE_K03A1.1 cel|CE_K06C4.13 cel|CE_K06C4.5 cel|CE_T10C6.13 cel|CE_ZK131.2 cel|CE_ZK131.3 cel|CE_ZK131.7 tca|Tcan_10702.1 tca|Tcan_12699.1 asu|AgB10_g174_t01 pun|PgR012_g077_t01
29	6	4	4	4	cel|CE_C04H5.6a cel|CE_EEED8.5 cel|CE_F56D2.6a cel|CE_K03H1.2 pun|PgR006_g011_t05 pun|PgR070_g004_t01 pun|PgR078_g023_t03 pun|PgR152_g001_t01 tca|Tcan_04199.1 tca|Tcan_04712.1 tca|Tcan_14615.1 tca|Tcan_15208.1 asu|AgB03_g374_t01 asu|AgR017_g082_t03 asu|AgR028_g030_t01 asu|AgR028_g032_t01 asu|AgR033_g113_t04 asu|AgR033_g116_t03
30	5	5	5	2	asu|AgB03_g350_t02 asu|AgB18_g052_t01 asu|AgR007_g086_t03 asu|AgR038_g063_t01 cel|CE_R11A5.4a cel|CE_W05G11.6a pun|PgE047_g002_t03 pun|PgR044_g051_t03 pun|PgR078_g037_t01 tca|Tcan_05789.1 tca|Tcan_05962.1 tca|Tcan_07800.1 tca|Tcan_11697.1 tca|Tcan_16872.1 asu|AgB31X_g008_t10 pun|PgR026_g022_t04 pun|PgR028_g063_t05
31	4	4	4	4	asu|AgB01_g011_t01 asu|AgR032_g081_t02 cel|CE_C04G2.9 cel|CE_Y59E9AL.2 cel|CE_Y59E9AL.3 cel|CE_Y69E1A.2 pun|PgB04_g188_t02 pun|PgB19_g005_t01 tca|Tcan_05717.1 tca|Tcan_11378.1 tca|Tcan_13139.1 tca|Tcan_15295.1 pun|PgR019_g016_t01 asu|AgB01_g312_t01 asu|AgR017_g212_t01 pun|PgR047_g059_t03
32	3	5	5	3	asu|AgB01_g540_t02 asu|AgR009X_g211_t02 asu|AgR012_g265_t02 cel|CE_M01F1.5 cel|CE_Y51A2D.4 cel|CE_Y51A2D.5 pun|PgR002_g065_t01 pun|PgR003_g097_t01 pun|PgR015_g078_t01 pun|PgR016_g103_t01 pun|PgR035X_g046_t02 tca|Tcan_04572.1 tca|Tcan_08300.1 tca|Tcan_11065.1 tca|Tcan_15997.1 tca|Tcan_17740.1
33	2	2	2	10	cel|CE_F26D2.3a cel|CE_H41C03.3 cel|CE_R07C3.3 cel|CE_T09E11.6 cel|CE_T09E11.9 cel|CE_T14B4.9 cel|CE_T27F6.1 cel|CE_T28F3.9 cel|CE_Y51H4A.25a cel|CE_ZK1225.2 asu|AgB10_g106_t02 pun|PgR127_g010_t01 tca|Tcan_09957.1 asu|AgR005_g090_t02 pun|PgR010_g145_t02 tca|Tcan_12115.1
34	3	2	1	9	asu|AgR002_g123_t01 asu|AgR022_g107_t02 asu|AgR128_g002_t01 cel|CE_C06B3.2 cel|CE_C31A11.1 cel|CE_C31A11.5 cel|CE_C31A11.7 cel|CE_F09B9.1a cel|CE_F36G9.12 cel|CE_F52F10.3 cel|CE_F52F10.4a cel|CE_W06G6.1 pun|PgR003_g162_t01 pun|PgR011_g166_t01 tca|Tcan_04451.1
35	2	4	6	3	cel|CE_K05F1.3 cel|CE_T08G2.3 cel|CE_T25G12.5 pun|PgR002_g103_t08 pun|PgR002_g105_t02 pun|PgR002_g104_t01 pun|PgR002_g106_t03 tca|Tcan_12048.1 tca|Tcan_12096.1 tca|Tcan_12061.1 tca|Tcan_12062.1 tca|Tcan_12098.1 tca|Tcan_12091.1 asu|AgR008_g084_t12 asu|AgR008_g085_t07
36	3	2	5	4	asu|AgB04_g064_t03 asu|AgR001_g516_t03 cel|CE_F26A3.3 cel|CE_F26A3.8a cel|CE_M01G12.12 pun|PgR054_g027_t07 pun|PgR093_g025_t03 tca|Tcan_06342.1 tca|Tcan_14532.1 asu|AgB01_g797_t04 tca|Tcan_10357.1 cel|CE_F10B5.7 tca|Tcan_18718.1 tca|Tcan_10330.1
37	4	4	5	1	asu|AgB07_g222_t03 asu|AgB07_g225_t01 asu|AgB07_g226_t03 asu|AgB07_g228_t03 pun|PgR003_g013_t03 pun|PgR003_g014_t10 pun|PgR003_g017_t08 pun|PgR003_g018_t02 tca|Tcan_08249.1 tca|Tcan_08250.1 tca|Tcan_08262.1 tca|Tcan_08270.1 tca|Tcan_08277.1 cel|CE_T16G12.1
38	3	3	2	6	asu|AgR013X_g192_t04 asu|AgR063_g005_t01 cel|CE_C04F6.1 cel|CE_C42D8.2a cel|CE_F59D8.1 cel|CE_F59D8.2 cel|CE_K07H8.6a cel|CE_K09F5.2 pun|PgR126X_g018_t01 pun|PgR126X_g019_t01 pun|PgR126X_g020_t01 tca|Tcan_05025.1 tca|Tcan_12573.1 asu|AgR005_g235_t01
39	2	3	4	5	cel|CE_C04H5.3 cel|CE_C49H3.1 cel|CE_T26C12.4 cel|CE_ZK896.8 cel|CE_ZK455.2 pun|PgR001X_g085_t01 pun|PgR100X_g008_t01 tca|Tcan_12536.1 tca|Tcan_14120.1 asu|AgB13X_g039_t06 asu|AgR015_g146_t04 pun|PgR178_g006_t01 tca|Tcan_09869.1 tca|Tcan_13476.1
40	1	1	1	11	cel|CE_C30G12.2 cel|CE_C55A6.3 cel|CE_C55A6.4 cel|CE_C55A6.5 cel|CE_C55A6.6 cel|CE_C55A6.7 cel|CE_F20G2.1 cel|CE_F20G2.2 cel|CE_K08F4.9 cel|CE_T04B2.6 cel|CE_ZK697.14 asu|AgB03_g308_t01 pun|PgR055_g018_t05 tca|Tcan_18780.1
41	2	1	2	9	cel|CE_F15D3.2 cel|CE_F35C5.5a cel|CE_F35C5.6 cel|CE_F35C5.7 cel|CE_Y39A1B.1 cel|CE_ZK666.5 cel|CE_ZK666.6 cel|CE_ZK666.7 cel|CE_W02D7.2 tca|Tcan_15038.1 tca|Tcan_15040.1 asu|AgR005_g305_t01 pun|PgR007_g115_t01 asu|AgR005_g307_t01
42	4	5	4	1	tca|Tcan_03389.1 tca|Tcan_10851.1 tca|Tcan_05888.1 tca|Tcan_11556.1 asu|AgB02_g527_t02 pun|PgR032X_g008_t03 asu|AgB03_g175_t02 pun|PgR019_g027_t01 asu|AgB08X_g203_t04 cel|CE_T14D7.2 pun|PgR009X_g214_t03 asu|AgE13_g005_t05 pun|PgE022_g002_t06 pun|PgE362_g001_t01
43	4	2	3	4	asu|AgB02_g275_t02 asu|AgR003_g328_t03 cel|CE_C26H9A.1a cel|CE_F35H10.4 cel|CE_VW02B12L.1 cel|CE_ZK637.8a pun|PgB06_g050_t01 pun|PgR012_g168_t04 tca|Tcan_05632.1 tca|Tcan_06214.1 tca|Tcan_14844.1 asu|AgB03_g113_t02 asu|AgB03_g114_t04
44	3	3	3	4	asu|AgB03_g050_t04 asu|AgB07_g260_t03 asu|AgR027X_g105_t02 cel|CE_C06E7.1a cel|CE_C06E7.3a cel|CE_C49F5.1 cel|CE_T13A10.11a pun|PgR003_g049_t04 pun|PgR028_g125_t03 tca|Tcan_05115.1 tca|Tcan_08105.1 tca|Tcan_08252.1 pun|PgR108X_g006_t02
45	3	2	3	5	asu|AgB03_g423_t03 asu|AgB06_g091_t02 cel|CE_C06G4.2a cel|CE_Y39A3CL.5a cel|CE_Y77E11A.10 cel|CE_Y77E11A.11a cel|CE_Y47H10A.1 pun|PgR010_g089_t02 pun|PgR016_g081_t01 tca|Tcan_07115.1 tca|Tcan_08152.1 tca|Tcan_16150.1 asu|AgR012_g241_t02
46	2	2	3	6	asu|AgR006_g075_t01 asu|AgR014X_g120_t04 cel|CE_E03G2.2 cel|CE_F21G4.2 cel|CE_Y43F8C.12 cel|CE_Y75B8A.26 cel|CE_F57C12.4 cel|CE_F57C12.5a tca|Tcan_05763.1 tca|Tcan_18395.1 pun|PgR121_g017_t01 pun|PgB02X_g086_t04 tca|Tcan_14341.1
47	3	2	4	4	asu|AgR012_g238_t07 asu|AgR014X_g033_t02 asu|AgR022_g192_t03 cel|CE_F14D7.6a cel|CE_T28C12.1 cel|CE_T28C12.2 cel|CE_ZK550.2 tca|Tcan_03480.1 tca|Tcan_12796.1 tca|Tcan_16132.1 tca|Tcan_16158.1 pun|PgB02X_g167_t01 pun|PgR016_g079_t05
48	1	1	1	10	cel|CE_C01B10.10 cel|CE_C01B10.4a cel|CE_C17H12.4 cel|CE_C23H4.2 cel|CE_C23H4.3 cel|CE_C23H4.4a cel|CE_C23H4.7 cel|CE_C42D4.2 cel|CE_E01G6.3 cel|CE_T22D1.11 asu|AgR002_g420_t04 pun|PgB01_g003_t01 tca|Tcan_03012.1
49	2	4	5	2	pun|PgB01_g031_t01 pun|PgB04_g178_t01 pun|PgB14X_g002_t02 pun|PgB14X_g003_t02 tca|Tcan_03019.1 tca|Tcan_12213.1 tca|Tcan_11386.1 tca|Tcan_11931.1 tca|Tcan_12206.1 asu|AgB01_g302_t01 asu|AgR009X_g118_t05 cel|CE_C23H3.7 cel|CE_W05E10.4a
50	3	1	3	5	asu|AgB08X_g085_t04 asu|AgB08X_g211_t01 asu|AgB08X_g213_t03 cel|CE_F43E2.4 cel|CE_W04C9.1a cel|CE_Y50E8A.16 cel|CE_ZK484.2a cel|CE_Y57G11C.1 tca|Tcan_14960.1 tca|Tcan_17702.1 tca|Tcan_17709.1 pun|PgR009X_g221_t01
51	4	5	2	1	asu|AgB19_g071_t07 asu|AgB23_g072_t01 asu|AgR055_g034_t03 pun|PgB01_g121_t02 pun|PgB05_g066_t03 pun|PgE003_g001_t05 pun|PgE031_g002_t06 pun|PgE152_g001_t05 tca|Tcan_02699.1 tca|Tcan_04940.1 cel|CE_C14C10.5a asu|AgR021X_g157_t01
52	3	3	3	3	asu|AgR001_g133_t01 asu|AgR015_g042_t01 asu|AgR015_g043_t04 cel|CE_F32A5.2a cel|CE_ZK430.8 pun|PgB03_g040_t03 pun|PgR034_g041_t06 tca|Tcan_03096.1 tca|Tcan_03102.1 tca|Tcan_03107.1 cel|CE_C16C8.2 pun|PgB03_g041_t01
53	2	3	4	3	asu|AgR004_g079_t02 asu|AgR004_g136_t01 cel|CE_C27D8.1 cel|CE_F53C3.1 cel|CE_Y39G8C.2 pun|PgR081_g024_t01 pun|PgR081_g025_t07 pun|PgR125_g005_t02 tca|Tcan_02568.1 tca|Tcan_17136.1 tca|Tcan_17141.1 tca|Tcan_17154.1
54	3	3	3	3	asu|AgR012_g080_t02 asu|AgR012_g082_t01 cel|CE_B0222.9 cel|CE_F15E6.6 cel|CE_F55B11.1 pun|PgB09_g033_t01 pun|PgR037_g048_t02 pun|PgR037_g052_t03 tca|Tcan_02849.1 tca|Tcan_02863.1 tca|Tcan_14870.1 asu|AgR002_g139_t04
55	2	2	3	5	cel|CE_C02G6.1 cel|CE_C02G6.2 cel|CE_C28F5.4 cel|CE_F44E7.4a cel|CE_Y70C5C.1 pun|PgR059_g023_t07 pun|PgR120_g010_t04 asu|AgB07_g282_t01 tca|Tcan_04372.1 asu|AgR049_g037_t05 tca|Tcan_17062.1 tca|Tcan_17074.1
56	1	1	2	8	cel|CE_C13A2.3 cel|CE_F32B5.3 cel|CE_F32D8.8 cel|CE_F56H6.2 cel|CE_K04A8.1 cel|CE_K04A8.2 cel|CE_K06H6.1 cel|CE_W08G11.1 asu|AgR043_g022_t01 pun|PgR028_g043_t01 tca|Tcan_14066.1 tca|Tcan_03354.1
57	2	4	2	4	cel|CE_C27A12.6 cel|CE_C27A12.7a cel|CE_C27A12.8 cel|CE_Y73F8A.34a pun|PgE036_g002_t02 pun|PgE090_g001_t01 pun|PgE090_g002_t01 pun|PgR005X_g160_t01 tca|Tcan_08958.1 tca|Tcan_11983.1 asu|AgE35_g006_t02 asu|AgR035X_g054_t01
58	2	5	3	2	cel|CE_T22B11.5a cel|CE_ZK836.2a pun|PgE001_g001_t03 pun|PgE002_g007_t01 pun|PgE002_g008_t01 pun|PgR124_g014_t08 tca|Tcan_05674.1 tca|Tcan_09172.1 asu|AgB06_g289_t03 pun|PgR036_g116_t02 tca|Tcan_11520.1 asu|AgR010_g260_t03
59	2	1	2	6	asu|AgB01_g750_t03 asu|AgR011_g065_t18 cel|CE_C48B4.1 cel|CE_F08A8.1a cel|CE_F08A8.2 cel|CE_F08A8.3 cel|CE_F08A8.4 cel|CE_F59F4.1 tca|Tcan_10334.1 tca|Tcan_18573.1 pun|PgR140_g005_t01
60	3	4	3	1	asu|AgB02_g524_t06 asu|AgB08X_g078_t03 asu|AgR005_g419_t04 pun|PgR007_g206_t01 pun|PgR009X_g051_t01 pun|PgR032X_g010_t02 pun|PgR062_g033_t02 tca|Tcan_08324.1 tca|Tcan_13032.1 tca|Tcan_17208.1 cel|CE_F14B4.2a
61	4	3	3	1	asu|AgB03_g337_t01 asu|AgR022_g158_t02 asu|AgR022_g159_t01 asu|AgB03_g338_t01 pun|PgR003_g211_t01 pun|PgR003_g212_t01 pun|PgR020_g150_t01 tca|Tcan_03459.1 tca|Tcan_03477.1 cel|CE_F54F11.2a tca|Tcan_02872.1
62	3	3	3	2	asu|AgB05_g091_t04 asu|AgR018X_g024_t08 cel|CE_H06H21.10a cel|CE_Y49E10.11a tca|Tcan_07714.1 tca|Tcan_13028.1 pun|PgR171_g004_t07 pun|PgR032X_g089_t12 tca|Tcan_18034.1 asu|AgR025_g048_t05 pun|PgR018_g102_t02
63	2	1	2	6	asu|AgB06_g043_t02 asu|AgB06_g045_t01 cel|CE_F32A11.7 cel|CE_W02B8.3 cel|CE_W02B8.4 cel|CE_W02B8.6 cel|CE_W06G6.7 cel|CE_Y52B11A.7 tca|Tcan_12894.1 tca|Tcan_12897.1 pun|PgB03_g143_t01
64	3	2	3	3	asu|AgB12_g082_t10 asu|AgR001_g234_t05 asu|AgR002_g474_t05 cel|CE_K12D12.1 cel|CE_R05D3.12a cel|CE_ZK1127.7 pun|PgB01_g049_t01 pun|PgR027_g035_t01 tca|Tcan_06079.1 tca|Tcan_15171.1 tca|Tcan_15694.1
65	5	1	4	1	asu|AgR007_g224_t01 asu|AgR025_g040_t09 tca|Tcan_15396.1 tca|Tcan_15401.1 asu|AgR002_g353_t01 pun|PgB23_g011_t02 tca|Tcan_04661.1 asu|AgR002_g355_t02 tca|Tcan_09491.1 asu|AgR021X_g058_t03 cel|CE_Y67D8C.5a
66	3	2	3	3	asu|AgR012_g212_t04 asu|AgR020_g029_t02 asu|AgR048X_g034_t02 cel|CE_R05C11.3 cel|CE_W09C2.3a cel|CE_Y67D8C.10a pun|PgR001X_g097_t03 pun|PgR003_g075_t01 tca|Tcan_10675.1 tca|Tcan_12413.1 tca|Tcan_13408.1
67	1	1	1	8	cel|CE_C18G1.3a cel|CE_C54C8.2 cel|CE_F01D4.9 cel|CE_F21H7.10 cel|CE_F22F7.6 cel|CE_F56H6.6 cel|CE_K08H2.9 cel|CE_T15D6.4 asu|AgR003_g244_t01 pun|PgR030_g020_t01 tca|Tcan_04886.1
68	1	1	1	8	cel|CE_C18G1.6 cel|CE_C18G1.7 cel|CE_E03H4.5 cel|CE_F39G3.2 cel|CE_M02F4.2 cel|CE_T15D6.12 cel|CE_ZK1025.4a cel|CE_ZK1025.7 asu|AgB23_g017_t01 pun|PgR170_g006_t02 tca|Tcan_11252.1
69	2	2	2	5	cel|CE_C25E10.3a cel|CE_C25E10.4 cel|CE_C25E10.5 cel|CE_F52F10.2 cel|CE_W03C9.6 asu|AgB12_g099_t07 pun|PgR027_g021_t01 asu|AgR030_g008_t07 pun|PgR024_g065_t01 tca|Tcan_07528.1 tca|Tcan_08646.1
70	2	1	3	5	cel|CE_C26B9.5 cel|CE_F56F10.1 cel|CE_F23B2.11 cel|CE_F23B2.12 cel|CE_Y116F11B.3 tca|Tcan_08759.1 tca|Tcan_08781.1 tca|Tcan_13012.1 asu|AgB01_g197_t01 asu|AgR026_g141_t09 pun|PgR071_g019_t01
71	2	1	1	7	cel|CE_F11G11.1 cel|CE_F11G11.2 cel|CE_F11G11.3 cel|CE_F35E8.8 cel|CE_R03D7.6a cel|CE_R05F9.5 cel|CE_ZK546.11 asu|AgR005_g358_t01 tca|Tcan_08037.1 asu|AgR005_g359_t02 pun|PgR007_g168_t04
72	2	2	2	5	cel|CE_F33H12.6 cel|CE_F59H6.5 cel|CE_Y16E11A.2 cel|CE_Y46B2A.2 cel|CE_ZK250.9 tca|Tcan_01233.1 tca|Tcan_01253.1 asu|AgR026_g089_t01 pun|PgR022X_g013_t01 asu|AgR137_g003_t02 pun|PgR022X_g014_t01
73	1	1	1	8	cel|CE_F48G7.12a cel|CE_F59B1.10 cel|CE_F59B1.8 cel|CE_T16G1.3 cel|CE_T16G1.4 cel|CE_T16G1.5 cel|CE_T16G1.6 cel|CE_T16G1.7 asu|AgR010_g311_t01 pun|PgB11_g049_t07 tca|Tcan_10533.1
74	3	3	3	2	cel|CE_R13.3 cel|CE_T21D12.15 pun|PgB02X_g036_t02 pun|PgR116_g008_t03 pun|PgR006_g061_t01 tca|Tcan_10862.1 tca|Tcan_12559.1 asu|AgB01_g380_t03 asu|AgB15X_g068_t05 asu|AgR043_g090_t10 tca|Tcan_17052.1
75	3	3	1	3	asu|AgB01_g537_t04 asu|AgB24_g005_t05 asu|AgR009X_g282_t03 cel|CE_C09F9.3a cel|CE_DH11.1a cel|CE_F30F8.2 pun|PgE216_g001_t03 pun|PgR015_g080_t01 pun|PgR035X_g101_t04 tca|Tcan_13470.1
76	3	3	3	1	asu|AgB02_g027_t04 asu|AgR008_g089_t06 pun|PgR002_g100_t01 pun|PgR183X_g001_t03 pun|PgR005X_g229_t03 tca|Tcan_16605.1 asu|AgB06_g127_t03 tca|Tcan_15358.1 cel|CE_C52D10.12 tca|Tcan_06767.1
77	3	3	2	2	asu|AgB02_g517_t05 asu|AgR022_g204_t01 cel|CE_C11D2.6a cel|CE_C27F2.2a pun|PgR003_g249_t01 pun|PgR032X_g015_t01 pun|PgR187_g001_t01 tca|Tcan_03468.1 tca|Tcan_06963.1 asu|AgB02_g519_t01
78	3	3	3	1	asu|AgB17_g035_t06 asu|AgB17_g036_t01 asu|AgB17_g037_t01 pun|PgB05_g115_t01 pun|PgB05_g116_t01 tca|Tcan_07859.1 tca|Tcan_07864.1 tca|Tcan_07867.1 pun|PgB05_g114_t01 cel|CE_Y32F6A.4
79	2	2	2	4	asu|AgR003_g015_t05 asu|AgR006_g043_t01 cel|CE_F33H1.2 cel|CE_K10B3.7 cel|CE_K10B3.8 cel|CE_T09F3.3 pun|PgB20_g009_t01 pun|PgR065_g008_t02 tca|Tcan_04764.1 tca|Tcan_17563.1
80	2	3	3	2	asu|AgR006_g038_t01 asu|AgR019X_g072_t02 cel|CE_F25H5.3a cel|CE_ZK593.1a pun|PgB01_g072_t01 pun|PgB12X_g013_t03 pun|PgR020_g042_t01 tca|Tcan_05548.1 tca|Tcan_08830.1 tca|Tcan_16981.1
81	2	2	2	4	asu|AgR008_g088_t01 asu|AgR022_g145_t02 cel|CE_H24K24.5a cel|CE_K08C7.2 cel|CE_K08C7.5 cel|CE_Y39A1A.19 pun|PgR002_g101_t02 pun|PgR003_g196_t01 tca|Tcan_06762.1 tca|Tcan_10092.1
82	2	4	3	1	asu|AgR012_g130_t03 asu|AgR043_g043_t03 pun|PgR029_g074_t01 pun|PgR037_g001_t02 pun|PgR097_g004_t01 tca|Tcan_05964.1 tca|Tcan_06683.1 tca|Tcan_05957.1 cel|CE_Y66H1B.2a pun|PgE285_g001_t01
83	3	3	3	1	asu|AgR034_g070_t01 asu|AgR058_g008_t03 pun|PgR006_g052_t02 pun|PgR006_g053_t01 pun|PgR030_g100_t02 tca|Tcan_08290.1 tca|Tcan_11103.1 cel|CE_T01D3.6a asu|AgR058_g006_t03 tca|Tcan_11116.1
84	2	1	5	2	asu|AgR040X_g005_t01 cel|CE_C09D1.1a cel|CE_F15G9.4a asu|AgR026_g113_t08 pun|PgR068_g050_t03 tca|Tcan_17534.1 tca|Tcan_04520.1 tca|Tcan_17532.1 tca|Tcan_17540.1 tca|Tcan_17551.1
85	1	1	1	7	cel|CE_B0273.2 cel|CE_F18A11.1 cel|CE_F21H12.5 cel|CE_F54C9.8 cel|CE_H12I13.4 cel|CE_Y45F10A.2 cel|CE_Y73B6BL.38 asu|AgE23_g005_t02 pun|PgE079_g002_t06 tca|Tcan_15149.1
86	1	1	1	7	cel|CE_B0554.5 cel|CE_B0554.7a cel|CE_Y39B6A.27 cel|CE_Y39B6A.29a cel|CE_Y39D8A.1a cel|CE_ZK6.6 cel|CE_ZK6.8 asu|AgR016_g148_t02 pun|PgB09_g090_t01 tca|Tcan_05528.1
87	2	1	1	6	cel|CE_C24G7.1 cel|CE_C24G7.2 cel|CE_C24G7.4 cel|CE_F23B2.3 cel|CE_T28F2.7 cel|CE_F28A12.1 asu|AgB06_g246_t01 asu|AgB06_g248_t01 pun|PgR045_g049_t04 tca|Tcan_11307.1
88	2	2	3	3	cel|CE_C46A5.4 cel|CE_K10B4.1 cel|CE_T06D8.10 tca|Tcan_10883.1 tca|Tcan_17177.1 tca|Tcan_15766.1 asu|AgB03_g212_t02 pun|PgR022X_g035_t01 asu|AgB12_g003_t01 pun|PgB18_g046_t01
89	2	2	2	4	cel|CE_F09F3.9 cel|CE_K11D12.4 cel|CE_W01A11.5 cel|CE_Y48G9A.10 pun|PgR061_g031_t09 pun|PgR061_g032_t01 asu|AgR001_g547_t01 tca|Tcan_04388.1 asu|AgR001_g548_t01 tca|Tcan_04383.1
90	2	2	3	3	cel|CE_F28H7.10a cel|CE_T09A12.3a cel|CE_T10B10.7 tca|Tcan_02694.1 tca|Tcan_10753.1 tca|Tcan_15065.1 asu|AgB03_g023_t01 pun|PgR046_g062_t01 asu|AgR018X_g126_t01 pun|PgR023_g128_t01
91	2	2	2	4	cel|CE_F46B6.8 cel|CE_F54F3.3 cel|CE_R11G11.14 cel|CE_ZK6.7a asu|AgR001_g562_t01 pun|PgR061_g041_t03 tca|Tcan_07516.1 asu|AgR001_g563_t01 pun|PgR061_g042_t09 tca|Tcan_07513.1
92	1	2	2	5	cel|CE_T02B5.1 cel|CE_T02B5.3 cel|CE_ZC376.1 cel|CE_ZC376.2a cel|CE_ZC376.3 tca|Tcan_11403.1 tca|Tcan_11416.1 asu|AgB01_g289_t01 pun|PgB04_g166_t01 pun|PgB04_g167_t01
93	1	2	3	4	cel|CE_Y32B12A.3 cel|CE_Y40B10A.2a cel|CE_Y40B10A.6 cel|CE_Y40B10A.7 tca|Tcan_04968.1 tca|Tcan_17391.1 asu|AgB10_g026_t01 pun|PgB09_g061_t01 tca|Tcan_10810.1 pun|PgB01_g143_t01
94	3	3	3	1	pun|PgR209X_g006_t01 pun|PgR209X_g008_t01 tca|Tcan_15502.1 tca|Tcan_15507.1 tca|Tcan_18576.1 asu|AgB13X_g009_t05 asu|AgR012_g164_t04 cel|CE_C27A7.5a asu|AgR042X_g069_t01 pun|PgR016_g020_t02
95	4	2	2	1	asu|AgB03_g273_t04 asu|AgB26_g026_t02 asu|AgE13_g006_t06 asu|AgR018X_g226_t01 pun|PgR023_g086_t01 pun|PgR055_g047_t05 tca|Tcan_05101.1 tca|Tcan_06282.1 cel|CE_K01A11.4a
96	3	2	2	2	asu|AgB05_g162_t03 asu|AgR005_g130_t06 cel|CE_K07D8.1 cel|CE_K08E5.3a pun|PgR010_g179_t02 pun|PgR012_g024_t02 tca|Tcan_12519.1 tca|Tcan_13072.1 asu|AgB05_g160_t02
97	2	2	2	3	asu|AgB05_g389_t01 asu|AgB09X_g072_t01 cel|CE_F21H12.4 cel|CE_Y110A2AL.8a cel|CE_ZK675.1 pun|PgB07_g077_t01 pun|PgR014X_g067_t01 tca|Tcan_08094.1 tca|Tcan_16354.1
98	3	2	2	2	asu|AgB07_g165_t06 asu|AgR020_g084_t07 cel|CE_F18C12.1 cel|CE_T21E12.4a pun|PgB04_g042_t01 pun|PgR043_g018_t04 tca|Tcan_03769.1 tca|Tcan_04778.1 asu|AgR020_g081_t01
99	2	3	2	2	asu|AgB08X_g101_t01 asu|AgR002_g325_t05 cel|CE_R11H6.1 cel|CE_Y71H2AM.11 pun|PgB04_g071_t03 pun|PgB04_g072_t01 pun|PgR009X_g029_t01 tca|Tcan_07936.1 tca|Tcan_10852.1
100	3	2	2	2	asu|AgB09X_g084_t01 asu|AgB09X_g086_t01 asu|AgB09X_g087_t03 cel|CE_C56C10.12 cel|CE_F54A3.3 pun|PgR014X_g077_t02 pun|PgR014X_g078_t02 tca|Tcan_12965.1 tca|Tcan_12985.1
101	2	4	2	1	asu|AgB10_g115_t01 asu|AgB10_g116_t01 pun|PgR011_g002_t02 pun|PgR011_g003_t03 pun|PgR127_g001_t03 pun|PgR127_g002_t01 cel|CE_T02G5.8 tca|Tcan_10818.1 tca|Tcan_04265.1
102	3	2	2	2	asu|AgB17_g004_t01 asu|AgR010_g196_t01 asu|AgR022_g119_t04 cel|CE_K04B12.1 cel|CE_Y55F3AL.1a pun|PgR041_g025_t07 tca|Tcan_06694.1 pun|PgR003_g173_t06 tca|Tcan_13270.1
103	2	2	2	3	asu|AgB19_g074_t03 asu|AgR008_g017_t03 cel|CE_F47E1.2 cel|CE_F47E1.4 cel|CE_Y32F6B.1 pun|PgB05_g067_t01 tca|Tcan_03855.1 tca|Tcan_16969.1 pun|PgR002_g159_t06
104	3	2	2	2	asu|AgB19_g077_t01 asu|AgR015_g189_t02 asu|AgR020_g145_t01 pun|PgB05_g022_t03 pun|PgR085_g012_t01 tca|Tcan_08519.1 tca|Tcan_14464.1 cel|CE_H14N18.4a cel|CE_T03D8.6a
105	3	1	1	4	asu|AgE01_g019_t01 asu|AgE03_g027_t02 asu|AgR001_g162_t01 cel|CE_K01H12.2 cel|CE_T01B11.4 cel|CE_T27E9.1a cel|CE_W02D3.6 pun|PgR034_g063_t01 tca|Tcan_03293.1
106	3	2	2	2	asu|AgE04_g020_t06 asu|AgR008_g242_t03 tca|Tcan_03751.1 tca|Tcan_14671.1 cel|CE_C47E8.5 pun|PgR158_g007_t02 asu|AgR020_g088_t01 cel|CE_T05E11.3a pun|PgB04_g038_t02
107	2	3	3	1	asu|AgR001_g264_t03 asu|AgR035X_g091_t02 pun|PgR005X_g133_t01 pun|PgR029_g119_t02 pun|PgR041_g055_t02 tca|Tcan_08465.1 tca|Tcan_16343.1 cel|CE_R05G6.8 tca|Tcan_18337.1
108	3	2	3	1	asu|AgR003_g156_t01 asu|AgR003_g157_t01 pun|PgR042_g104_t06 pun|PgR042_g105_t02 tca|Tcan_11004.1 tca|Tcan_11021.1 tca|Tcan_11033.1 asu|AgR003_g154_t01 cel|CE_K07E12.1a
109	2	2	3	2	asu|AgR003_g206_t06 asu|AgR042X_g081_t09 cel|CE_Y46G5A.4 cel|CE_Y54E2A.4a pun|PgB06_g121_t02 pun|PgR179_g007_t02 tca|Tcan_09971.1 tca|Tcan_05430.1 tca|Tcan_09022.1
110	2	2	1	4	asu|AgR004_g189_t01 asu|AgR033_g080_t01 cel|CE_F47B3.1 cel|CE_F47B3.6 cel|CE_F47B3.7 cel|CE_F47B3.2 pun|PgR046_g081_t01 pun|PgR129_g011_t03 tca|Tcan_15626.1
111	2	3	2	2	asu|AgR005_g135_t05 asu|AgR010_g204_t06 cel|CE_F35G2.4 cel|CE_Y47D3B.10 pun|PgR010_g183_t01 pun|PgR010_g184_t01 pun|PgR041_g021_t02 tca|Tcan_13037.1 tca|Tcan_13062.1
112	3	2	3	1	asu|AgR005_g412_t02 asu|AgR017_g179_t01 asu|AgR017_g181_t01 tca|Tcan_05983.1 tca|Tcan_15453.1 cel|CE_F44B9.1a pun|PgR008_g151_t03 pun|PgR008_g150_t05 tca|Tcan_05773.1
113	2	3	2	2	asu|AgR005_g453_t03 asu|AgR040X_g087_t03 cel|CE_C24B5.3 cel|CE_F31F6.5 pun|PgR024_g006_t01 tca|Tcan_12836.1 tca|Tcan_18231.1 pun|PgB02X_g195_t01 pun|PgB02X_g196_t01
114	3	3	2	1	asu|AgR009X_g189_t07 asu|AgR010_g181_t04 pun|PgR001X_g178_t01 pun|PgR026_g108_t03 pun|PgR033_g094_t01 asu|AgR009X_g188_t06 tca|Tcan_14367.1 tca|Tcan_16810.1 cel|CE_H24G06.1a
115	3	2	3	1	asu|AgR027X_g089_t07 asu|AgR034_g024_t06 asu|AgR034_g026_t03 pun|PgR076_g013_t01 pun|PgR076_g014_t01 tca|Tcan_13710.1 tca|Tcan_13713.1 tca|Tcan_14141.1 cel|CE_K06A4.3
116	1	1	2	5	cel|CE_C03A7.11 cel|CE_C03A7.13 cel|CE_F56B3.7 cel|CE_T03D3.1 cel|CE_T25B9.7 asu|AgR022_g029_t01 pun|PgR003_g107_t04 tca|Tcan_04597.1 tca|Tcan_05133.1
117	1	1	1	6	cel|CE_C03G6.19 cel|CE_C05E4.1 cel|CE_F20D6.3 cel|CE_F20D6.4a cel|CE_Y32G9A.4 cel|CE_C05E4.3 asu|AgR044_g037_t01 pun|PgR036_g015_t01 tca|Tcan_17021.1
118	2	2	2	3	cel|CE_C07G3.2 cel|CE_C08E8.4 cel|CE_T24A6.7 asu|AgB21_g076_t04 pun|PgR029_g036_t02 tca|Tcan_09377.1 asu|AgR007_g041_t06 pun|PgR026_g058_t01 tca|Tcan_15846.1
119	1	1	1	6	cel|CE_C47F8.4 cel|CE_C54C8.5 cel|CE_E03H4.12 cel|CE_T09E11.1 cel|CE_T15D6.7 cel|CE_W07G9.2a asu|AgB15X_g081_t02 pun|PgR147X_g001_t01 tca|Tcan_08975.1
120	2	3	2	2	cel|CE_C53A5.3 cel|CE_R06C1.1 pun|PgR066_g055_t01 pun|PgR128_g018_t03 pun|PgR398_g001_t01 asu|AgR028_g067_t01 tca|Tcan_06706.1 asu|AgR056_g010_t05 tca|Tcan_10575.1
121	3	2	2	2	cel|CE_C53C11.3 cel|CE_Y65B4BR.3 pun|PgB09_g084_t10 pun|PgR052_g033_t01 tca|Tcan_10218.1 tca|Tcan_10825.1 asu|AgE27_g005_t01 asu|AgR013X_g244_t01 asu|AgR016_g155_t04
122	1	1	2	5	cel|CE_DC2.5a cel|CE_E04F6.15 cel|CE_E04F6.7 cel|CE_K10H10.3a cel|CE_K10H10.6 tca|Tcan_02799.1 tca|Tcan_18750.1 asu|AgR052_g052_t03 pun|PgR075_g050_t01
123	2	2	3	2	cel|CE_F02H6.5a cel|CE_Y9C9A.16a tca|Tcan_04767.1 tca|Tcan_09430.1 tca|Tcan_15257.1 asu|AgR009X_g111_t02 pun|PgB14X_g006_t02 asu|AgR049_g060_t01 pun|PgR059_g009_t01
124	1	1	2	5	cel|CE_F10D2.10 cel|CE_K08D9.4a cel|CE_Y73C8B.1 cel|CE_Y73C8B.2 cel|CE_Y73C8B.3 asu|AgR011_g094_t03 pun|PgR077_g035_t02 tca|Tcan_11748.1 tca|Tcan_11740.1
125	2	2	2	3	cel|CE_F10D2.9 cel|CE_VZK822L.1a cel|CE_W06D12.3 asu|AgB20_g061_t06 pun|PgR049_g040_t02 asu|AgB20_g062_t01 pun|PgR049_g039_t01 tca|Tcan_17214.1 tca|Tcan_17215.1
126	1	1	1	6	cel|CE_F17A9.4 cel|CE_F17A9.5 cel|CE_F56D5.3 cel|CE_T10B5.8 cel|CE_W06H8.2 cel|CE_Y73C8C.10 asu|AgR008_g254_t01 pun|PgR013_g009_t06 tca|Tcan_09625.1
127	1	1	2	5	cel|CE_F32B5.1 cel|CE_F44G3.2 cel|CE_F46H5.3a cel|CE_W10C8.5 cel|CE_ZC434.8 asu|AgR018X_g104_t03 pun|PgR032X_g021_t01 tca|Tcan_08980.1 tca|Tcan_08752.1
128	2	2	2	3	cel|CE_Y54G11A.13a cel|CE_Y54G11A.5 cel|CE_Y54G11A.6 tca|Tcan_02644.1 tca|Tcan_14873.1 asu|AgR002_g135_t04 pun|PgB09_g030_t03 asu|AgR015_g149_t01 pun|PgR187_g005_t01
129	1	4	2	2	pun|PgR001X_g198_t01 pun|PgR033_g114_t01 pun|PgR001X_g199_t01 pun|PgR033_g115_t01 asu|AgR014X_g239_t07 cel|CE_F33D4.4 tca|Tcan_09364.1 tca|Tcan_14450.1 cel|CE_Y41D4A.5
130	2	2	3	2	tca|Tcan_04166.1 tca|Tcan_06850.1 tca|Tcan_07531.1 asu|AgB01_g023_t02 asu|AgR064_g013_t11 cel|CE_Y43F8B.3a pun|PgR006_g014_t03 cel|CE_C34F6.1 pun|PgR002_g279_t01
131	3	2	3	1	asu|AgR002_g267_t01 cel|CE_K11C4.5a pun|PgR335_g001_t01 tca|Tcan_14637.1 asu|AgR007_g113_t04 pun|PgR026_g001_t02 tca|Tcan_13549.1 tca|Tcan_13550.1 asu|AgR007_g114_t01
132	2	2	2	2	asu|AgB01_g300_t01 asu|AgB07_g022_t01 cel|CE_Y54E10A.9a cel|CE_Y71H2AM.19a tca|Tcan_11396.1 tca|Tcan_13997.1 pun|PgB04_g175_t02 pun|PgR143_g012_t01
133	2	2	2	2	asu|AgB02_g150_t01 asu|AgR035X_g023_t03 pun|PgB24X_g009_t01 pun|PgR017X_g077_t01 tca|Tcan_12018.1 tca|Tcan_12540.1 cel|CE_T20H4.3a cel|CE_ZC434.5
134	2	2	2	2	asu|AgB02_g366_t06 asu|AgB06_g220_t01 cel|CE_K09C8.5 cel|CE_ZK994.3 pun|PgR033_g033_t02 pun|PgR045_g031_t02 tca|Tcan_04300.1 tca|Tcan_16440.1
135	2	1	3	2	asu|AgB02_g501_t02 asu|AgR023_g009_t02 cel|CE_F45E1.6 cel|CE_Y49E10.6a tca|Tcan_10055.1 tca|Tcan_10056.1 tca|Tcan_10057.1 pun|PgB21_g027_t01
136	3	3	1	1	asu|AgB03_g007_t04 asu|AgR002_g376_t05 pun|PgE049_g001_t01 pun|PgR155_g007_t04 cel|CE_F36A4.7 tca|Tcan_18140.1 asu|AgR002_g374_t03 pun|PgR155_g005_t02
137	2	3	2	1	asu|AgB04_g007_t02 asu|AgB04_g009_t01 tca|Tcan_11663.1 tca|Tcan_18463.1 pun|PgR006_g153_t01 cel|CE_T19B10.3 pun|PgR006_g151_t01 pun|PgR006_g152_t01
138	2	2	2	2	asu|AgB05_g100_t06 asu|AgR021X_g101_t02 cel|CE_B0280.12a cel|CE_C06E1.4 tca|Tcan_07726.1 tca|Tcan_14699.1 pun|PgR098_g003_t01 pun|PgR019_g109_t01
139	3	2	2	1	asu|AgB05_g265_t05 asu|AgE66_g002_t01 asu|AgR066_g018_t01 cel|CE_F22D6.6 pun|PgB01_g174_t05 tca|Tcan_11468.1 tca|Tcan_14013.1 pun|PgB28_g014_t01
140	2	2	2	2	asu|AgB06_g068_t02 asu|AgR002_g217_t09 cel|CE_B0545.1a cel|CE_F57F5.5a pun|PgB03_g129_t01 pun|PgB05_g097_t02 tca|Tcan_08183.1 tca|Tcan_16181.1
141	2	2	3	1	asu|AgB07_g097_t03 asu|AgB07_g163_t01 pun|PgR043_g016_t02 pun|PgR075_g039_t01 tca|Tcan_04802.1 tca|Tcan_12225.1 tca|Tcan_13353.1 cel|CE_T23G11.3
142	2	2	2	2	asu|AgB07_g157_t01 asu|AgR017_g134_t02 cel|CE_C48B4.4a pun|PgR008_g192_t02 pun|PgR043_g012_t01 cel|CE_Y39D8C.1 tca|Tcan_12670.1 tca|Tcan_15494.1
143	2	2	2	2	asu|AgB15X_g118_t02 asu|AgR020_g228_t01 cel|CE_K09A9.5 cel|CE_T26A5.3 pun|PgB02X_g025_t01 pun|PgB17_g055_t01 tca|Tcan_15898.1 tca|Tcan_17687.1
144	2	2	2	2	asu|AgB21_g011_t02 asu|AgB23_g050_t01 cel|CE_F29F11.6a cel|CE_F56C9.1 pun|PgB16_g037_t01 pun|PgR029_g075_t02 tca|Tcan_11076.1 tca|Tcan_16944.1
145	2	2	1	3	asu|AgB32_g005_t04 asu|AgR037_g094_t10 cel|CE_B0222.2 cel|CE_B0222.3 cel|CE_F09G2.3 pun|PgE132_g002_t04 pun|PgR089_g023_t04 tca|Tcan_05083.1
146	2	3	2	1	asu|AgR001_g153_t04 asu|AgR023_g018_t05 pun|PgB31_g013_t02 pun|PgR034_g058_t06 pun|PgE133_g001_t03 tca|Tcan_04138.1 tca|Tcan_09077.1 cel|CE_C05C10.3
147	3	2	1	2	asu|AgR002_g110_t01 asu|AgR028_g073_t01 asu|AgR028_g086_t01 cel|CE_C06A1.3 cel|CE_F58G1.3 pun|PgR011_g176_t01 pun|PgR053_g022_t02 tca|Tcan_11542.1
148	2	2	2	2	asu|AgR002_g297_t03 asu|AgR003_g092_t04 cel|CE_F19H8.1a cel|CE_ZK54.2a pun|PgB06_g108_t01 pun|PgR001X_g015_t01 tca|Tcan_16513.1 tca|Tcan_18946.1
149	2	1	2	3	asu|AgR004_g091_t03 asu|AgR017_g072_t01 cel|CE_C18H7.4 cel|CE_R05H5.4 cel|CE_ZC581.7 tca|Tcan_12355.1 tca|Tcan_15604.1 pun|PgR125_g015_t09
150	2	2	2	2	asu|AgR007_g127_t02 asu|AgR073_g002_t02 cel|CE_C34G6.2 cel|CE_F21C3.2 pun|PgR062_g012_t02 pun|PgR092_g024_t02 tca|Tcan_14094.1 tca|Tcan_15804.1
151	2	1	2	3	asu|AgR007_g147_t09 asu|AgR029_g118_t04 cel|CE_C05C12.3 cel|CE_F54D1.5 cel|CE_T01H8.5a pun|PgR053_g043_t02 tca|Tcan_06668.1 tca|Tcan_11139.1
152	3	2	2	1	asu|AgR010_g200_t02 asu|AgR016_g016_t01 asu|AgR061_g002_t01 pun|PgR019_g060_t01 pun|PgR019_g098_t01 cel|CE_K12C11.1a tca|Tcan_12930.1 tca|Tcan_12928.1
153	2	2	2	2	asu|AgR014X_g167_t01 asu|AgR022_g155_t03 cel|CE_C50F4.2 cel|CE_Y71H10A.1a pun|PgB02X_g007_t01 pun|PgR003_g204_t02 tca|Tcan_03484.1 tca|Tcan_18014.1
154	2	2	2	2	asu|AgR017_g034_t01 asu|AgR033_g079_t03 cel|CE_T03F1.5 cel|CE_W09C3.6 pun|PgR011_g026_t02 pun|PgR129_g012_t01 tca|Tcan_05698.1 tca|Tcan_17174.1
155	2	2	2	2	asu|AgR019X_g132_t01 asu|AgR048X_g048_t01 cel|CE_F28H1.3 cel|CE_W02B12.6a pun|PgR038X_g104_t01 pun|PgR084X_g042_t01 tca|Tcan_08163.1 tca|Tcan_02081.1
156	1	1	2	4	cel|CE_B0491.3 cel|CE_C27H6.4a cel|CE_R13H9.1 cel|CE_Y48A6C.3 tca|Tcan_17489.1 tca|Tcan_17491.1 asu|AgR030_g033_t01 pun|PgR024_g077_t19
157	1	2	2	3	cel|CE_B0511.4 cel|CE_C27D6.11 cel|CE_Y38H8A.4 asu|AgE23_g001_t01 pun|PgE222_g001_t02 tca|Tcan_03198.1 pun|PgR013_g058_t03 tca|Tcan_14679.1
158	4	1	1	2	cel|CE_C01B7.6 cel|CE_F07B7.12 asu|AgR008_g300_t02 tca|Tcan_06202.1 asu|AgR008_g301_t03 asu|AgR008_g302_t02 pun|PgR013_g046_t21 asu|AgR008_g304_t04
159	1	1	2	4	cel|CE_C02D5.3 cel|CE_C02D5.4 cel|CE_C29E4.7 cel|CE_F13A7.10 asu|AgR005_g103_t01 pun|PgR010_g153_t03 tca|Tcan_12143.1 tca|Tcan_12139.1
160	2	1	2	3	cel|CE_C04G2.2 cel|CE_W01B6.2 cel|CE_C45G9.1 tca|Tcan_02837.1 tca|Tcan_05866.1 asu|AgR012_g088_t03 pun|PgR037_g044_t03 asu|AgR055_g050_t03
161	1	1	1	5	cel|CE_C06B3.4 cel|CE_C06B3.5 cel|CE_C56G2.6a cel|CE_F11A5.12 cel|CE_F25G6.5 asu|AgB18_g029_t02 pun|PgR044_g081_t01 tca|Tcan_08365.1
162	1	1	1	5	cel|CE_F08A8.5a cel|CE_T26E4.4 cel|CE_T26H5.8 cel|CE_F58D5.3 cel|CE_T26E4.3 asu|AgR001_g311_t01 pun|PgR031_g065_t01 tca|Tcan_13522.1
163	2	2	2	2	cel|CE_C13G3.3a cel|CE_W08G11.4 asu|AgR024_g004_t02 pun|PgB08_g016_t01 pun|PgR036_g077_t06 tca|Tcan_04757.1 asu|AgR037_g010_t02 tca|Tcan_07203.1
164	1	1	2	4	cel|CE_C25A8.5 cel|CE_C35E7.10a cel|CE_C55C3.4 cel|CE_F23C8.7 tca|Tcan_16938.1 tca|Tcan_16947.1 asu|AgR041_g065_t01 pun|PgR029_g053_t01
165	3	1	2	2	cel|CE_C26E6.4 cel|CE_F09F7.3 asu|AgB21_g072_t02 pun|PgR029_g071_t01 tca|Tcan_12324.1 tca|Tcan_14294.1 asu|AgR043_g036_t05 asu|AgR043_g038_t04
166	2	2	1	3	cel|CE_C50H11.1 cel|CE_F41C3.3 asu|AgB01_g046_t02 cel|CE_M01A10.3 pun|PgR002_g263_t02 tca|Tcan_04688.1 asu|AgB01_g047_t02 pun|PgR002_g262_t01
167	2	3	1	2	cel|CE_C52B9.8 cel|CE_F01G4.1 asu|AgE31_g006_t01 pun|PgE113_g002_t06 asu|AgR025_g024_t03 pun|PgR179_g003_t01 tca|Tcan_04821.1 pun|PgR018_g077_t03
168	2	2	2	2	cel|CE_D1009.1a cel|CE_F28D1.9 pun|PgR003_g262_t02 pun|PgR054_g016_t01 tca|Tcan_05690.1 tca|Tcan_10345.1 asu|AgB01_g810_t02 asu|AgR022_g214_t02
169	2	2	2	2	cel|CE_F02A9.6 cel|CE_R107.8 pun|PgB15_g026_t02 pun|PgR054_g034_t03 asu|AgB01_g783_t05 tca|Tcan_14056.1 asu|AgR033_g057_t08 tca|Tcan_16033.1
170	1	1	1	5	cel|CE_F08F3.7 cel|CE_K09A11.2 cel|CE_K09A11.3 cel|CE_K09A11.4 cel|CE_R04D3.1 asu|AgR060_g025_t01 pun|PgR020_g037_t01 tca|Tcan_16990.1
171	1	2	2	3	cel|CE_F14F11.1a cel|CE_R186.5 cel|CE_R07A4.1 tca|Tcan_03320.1 tca|Tcan_16447.1 asu|AgR011_g083_t03 pun|PgR033_g038_t01 pun|PgR077_g028_t04
172	2	2	2	2	cel|CE_F18A12.8a cel|CE_ZK20.6 pun|PgR064_g040_t02 pun|PgR121_g010_t01 tca|Tcan_10151.1 tca|Tcan_13365.1 asu|AgR001_g629_t04 asu|AgR006_g067_t02
173	1	2	1	4	cel|CE_F21F8.3 cel|CE_F21F8.4 cel|CE_F21F8.7 cel|CE_F28A12.4 asu|AgB11_g160_t09 pun|PgR091_g013_t01 tca|Tcan_07400.1 pun|PgR166_g005_t01
174	2	2	2	2	cel|CE_F25H5.4a cel|CE_ZK328.2 tca|Tcan_11808.1 tca|Tcan_16066.1 asu|AgB04_g312_t02 pun|PgR004_g233_t01 asu|AgR031_g016_t03 pun|PgR048_g035_t01
175	3	1	2	2	cel|CE_F29D11.1 cel|CE_T21E3.3 tca|Tcan_04344.1 tca|Tcan_08496.1 asu|AgB04_g030_t13 pun|PgR018_g064_t04 asu|AgB04_g034_t01 asu|AgR013X_g082_t02
176	1	1	1	5	cel|CE_F30H5.3 cel|CE_T22F7.3 cel|CE_Y55F3BR.2a cel|CE_ZC84.1 cel|CE_ZC84.6 asu|AgR005_g440_t01 pun|PgR113_g014_t03 tca|Tcan_16895.1
177	1	2	2	3	cel|CE_F33D11.10 cel|CE_Y65B4A.6a pun|PgB01_g013_t01 pun|PgB05_g137_t03 tca|Tcan_00107.1 tca|Tcan_03966.1 asu|AgR002_g437_t02 cel|CE_F57B9.6a
178	2	2	2	2	cel|CE_K02B2.1 cel|CE_Y110A7A.6a pun|PgR027_g100_t02 pun|PgR041_g005_t01 asu|AgR010_g234_t01 tca|Tcan_14481.1 tca|Tcan_18606.1 asu|AgR029_g108_t07
179	1	2	2	3	cel|CE_K11G12.3 cel|CE_K11G12.4a cel|CE_Y69A2AR.4 tca|Tcan_09460.1 tca|Tcan_16572.1 asu|AgB13X_g023_t01 pun|PgR005X_g180_t02 pun|PgB03_g158_t13
180	2	2	2	2	cel|CE_Y75B12B.2 cel|CE_Y75B12B.5 asu|AgR001_g140_t03 pun|PgR034_g048_t01 tca|Tcan_05477.1 asu|AgR002_g085_t01 pun|PgR011_g189_t01 tca|Tcan_06524.1
181	2	2	3	1	pun|PgR006_g092_t01 pun|PgR031_g013_t02 tca|Tcan_08693.1 tca|Tcan_11607.1 tca|Tcan_10429.1 asu|AgB06_g149_t03 cel|CE_M03D4.1a asu|AgR001_g382_t06
182	3	2	2	1	pun|PgR011_g061_t11 pun|PgR178_g009_t03 tca|Tcan_09852.1 tca|Tcan_14303.1 asu|AgR011_g273_t02 cel|CE_C04F12.1 asu|AgR015_g142_t02 asu|AgR015_g143_t01
183	2	2	3	1	pun|PgR011_g119_t02 pun|PgR147X_g008_t02 asu|AgB15X_g074_t05 tca|Tcan_10879.1 asu|AgR016_g238_t03 cel|CE_Y46G5A.31 tca|Tcan_10865.1 tca|Tcan_14500.1
184	1	2	4	1	pun|PgR027_g005_t04 pun|PgR053_g038_t04 tca|Tcan_06671.1 tca|Tcan_06672.1 tca|Tcan_15559.1 asu|AgR007_g153_t04 cel|CE_AC3.2 tca|Tcan_06669.1
185	2	1	4	1	tca|Tcan_05571.1 tca|Tcan_17064.1 tca|Tcan_17071.1 tca|Tcan_17073.1 asu|AgB03_g193_t05 cel|CE_K07C10.1 pun|PgR059_g027_t01 asu|AgR049_g034_t01
186	2	2	3	1	tca|Tcan_07922.1 tca|Tcan_12214.1 tca|Tcan_12219.1 asu|AgR002_g337_t03 cel|CE_E04F6.11a pun|PgR148_g006_t01 asu|AgR009X_g119_t02 pun|PgB14X_g001_t01
187	2	2	2	2	tca|Tcan_11273.1 tca|Tcan_18160.1 asu|AgB10_g160_t03 cel|CE_C35C5.5 pun|PgR085_g055_t01 asu|AgR053_g008_t05 cel|CE_ZC504.2 pun|PgB01_g249_t01
188	1	2	2	3	asu|AgB08X_g217_t01 cel|CE_Y106G6G.2 pun|PgR009X_g226_t01 tca|Tcan_16326.1 cel|CE_T20F10.5 tca|Tcan_16349.1 cel|CE_Y106G6G.6 pun|PgR009X_g227_t01
189	2	1	2	2	asu|AgB01_g667_t01 asu|AgB18_g006_t04 cel|CE_F09B12.3 cel|CE_Y54F10AM.8 tca|Tcan_10394.1 tca|Tcan_18949.1 pun|PgR044_g099_t01
190	2	3	1	1	asu|AgB02_g102_t01 asu|AgE06_g023_t02 cel|CE_C18F3.2a pun|PgR017X_g024_t02 tca|Tcan_03992.1 pun|PgE219_g001_t01 pun|PgE364_g001_t02
191	2	2	2	1	asu|AgB02_g471_t05 asu|AgR005_g072_t06 pun|PgE073_g002_t03 pun|PgR010_g129_t11 tca|Tcan_12157.1 tca|Tcan_15663.1 cel|CE_ZK1058.1
192	2	2	2	1	asu|AgB03_g476_t06 asu|AgB03_g478_t02 pun|PgB26_g004_t02 pun|PgB26_g005_t02 tca|Tcan_18687.1 tca|Tcan_18691.1 cel|CE_C36A4.9a
193	2	2	2	1	asu|AgB04_g091_t03 asu|AgR015_g054_t03 pun|PgB03_g032_t01 pun|PgR094_g032_t01 cel|CE_F54D5.12 tca|Tcan_05704.1 tca|Tcan_09843.1
194	2	2	1	2	asu|AgB04_g100_t05 asu|AgR011_g330_t03 cel|CE_F31E3.5 cel|CE_R03G5.1a pun|PgR004_g050_t01 pun|PgR005X_g027_t01 tca|Tcan_02609.1
195	3	1	1	2	asu|AgB04_g294_t01 asu|AgR065_g003_t04 cel|CE_Y105E8B.4 tca|Tcan_08936.1 asu|AgR065_g002_t01 cel|CE_Y105E8B.3 pun|PgR004_g212_t05
196	4	1	1	1	asu|AgB04_g350_t01 asu|AgR051X_g014_t01 asu|AgR014X_g012_t01 asu|AgR033_g021_t01 pun|PgR007_g218_t01 cel|CE_T16H12.13 tca|Tcan_01275.1
197	2	2	1	2	asu|AgB04_g430_t04 asu|AgR046_g008_t01 pun|PgR062_g025_t01 pun|PgR107_g019_t06 tca|Tcan_16852.1 cel|CE_F25B5.3a cel|CE_Y10G11A.1a
198	2	2	2	1	asu|AgB04_g460_t04 asu|AgB09X_g057_t01 tca|Tcan_06462.1 tca|Tcan_10162.1 cel|CE_F10G7.8 pun|PgE214_g001_t03 pun|PgR014X_g054_t02
199	2	2	2	1	asu|AgB05_g056_t01 asu|AgB05_g057_t04 tca|Tcan_13969.1 tca|Tcan_13977.1 cel|CE_Y39E4A.3a pun|PgR067_g020_t01 pun|PgR067_g023_t01
200	2	2	1	2	asu|AgB05_g272_t03 asu|AgB06_g265_t01 cel|CE_C03G5.1 cel|CE_C34B2.7 pun|PgB01_g168_t02 pun|PgR036_g098_t02 tca|Tcan_18851.1
201	2	2	2	1	asu|AgB05_g393_t03 asu|AgR013X_g091_t02 pun|PgB07_g080_t02 pun|PgR005X_g036_t02 tca|Tcan_04333.1 tca|Tcan_08077.1 cel|CE_F08B6.4a
202	2	2	2	1	asu|AgB09X_g141_t02 asu|AgE01_g002_t01 pun|PgE004_g004_t02 pun|PgR014X_g129_t01 tca|Tcan_03306.1 tca|Tcan_12972.1 cel|CE_R08D7.3
203	2	2	2	1	asu|AgB13X_g017_t01 asu|AgR004_g147_t06 pun|PgB06_g119_t01 pun|PgR081_g014_t02 tca|Tcan_10846.1 tca|Tcan_16690.1 cel|CE_T02G5.13a
204	2	2	2	1	asu|AgB18_g013_t01 asu|AgR003_g182_t04 pun|PgR018_g024_t01 pun|PgR044_g095_t02 cel|CE_Y39E4B.12a tca|Tcan_18948.1 tca|Tcan_12428.1
205	2	1	1	3	asu|AgB19_g096_t04 asu|AgR015_g176_t04 cel|CE_C53A3.2 cel|CE_F44E7.2 cel|CE_K09H11.7 pun|PgB05_g041_t01 tca|Tcan_07871.1
206	3	1	2	1	asu|AgB23_g046_t04 asu|AgR023_g030_t01 asu|AgE56_g001_t05 cel|CE_F46E10.10a pun|PgB16_g034_t01 tca|Tcan_11227.1 tca|Tcan_04744.1
207	2	2	1	2	asu|AgE46_g003_t05 asu|AgR013X_g097_t04 cel|CE_F47G6.4a cel|CE_Y66H1A.6a pun|PgE099_g001_t07 pun|PgR005X_g033_t01 tca|Tcan_04328.1
208	2	2	1	2	asu|AgR001_g557_t01 asu|AgR001_g558_t03 cel|CE_R04B5.5 cel|CE_R04B5.6 pun|PgR061_g037_t01 pun|PgR061_g038_t01 tca|Tcan_07164.1
209	2	2	2	1	asu|AgR002_g193_t02 asu|AgR017_g057_t06 pun|PgB05_g079_t01 pun|PgR194_g002_t01 tca|Tcan_03143.1 tca|Tcan_15380.1 cel|CE_T27A3.5
210	2	2	2	1	asu|AgR003_g148_t01 asu|AgR033_g123_t04 pun|PgR006_g020_t01 cel|CE_Y38F2AR.7 tca|Tcan_04182.1 tca|Tcan_04186.1 pun|PgR006_g021_t01
211	2	2	2	1	asu|AgR003_g314_t01 asu|AgR003_g316_t01 cel|CE_C50C3.6 pun|PgR012_g182_t02 tca|Tcan_05904.1 pun|PgR012_g179_t02 tca|Tcan_05918.1
212	2	2	2	1	asu|AgR004_g118_t03 asu|AgR024_g026_t01 pun|PgR039_g005_t02 pun|PgR101_g011_t03 tca|Tcan_02740.1 tca|Tcan_08749.1 cel|CE_F48E8.5
213	2	2	2	1	asu|AgR004_g297_t01 asu|AgR020_g041_t02 pun|PgB18_g001_t04 pun|PgR080_g025_t01 tca|Tcan_14265.1 tca|Tcan_18745.1 cel|CE_F55A8.2a
214	3	1	2	1	asu|AgR005_g127_t01 asu|AgR005_g128_t01 asu|AgR011_g127_t01 tca|Tcan_11943.1 pun|PgR065_g035_t05 tca|Tcan_11930.1 cel|CE_F08B1.1a
215	2	1	2	2	asu|AgR006_g064_t03 asu|AgR033_g024_t01 cel|CE_B0491.8a cel|CE_T27D12.2a tca|Tcan_03125.1 tca|Tcan_16196.1 pun|PgR121_g007_t01
216	2	2	2	1	asu|AgR008_g224_t04 asu|AgR046_g076_t08 pun|PgB13_g033_t02 pun|PgR122_g022_t04 tca|Tcan_04622.1 tca|Tcan_15375.1 cel|CE_C47E12.5a
217	2	2	2	1	asu|AgR009X_g151_t05 asu|AgR013X_g111_t01 pun|PgR001X_g148_t01 pun|PgR056X_g067_t01 tca|Tcan_16352.1 cel|CE_Y18D10A.5 tca|Tcan_15716.1
218	2	2	2	1	asu|AgR010_g148_t08 asu|AgR043_g024_t02 pun|PgR006_g195_t03 pun|PgR028_g044_t01 tca|Tcan_04135.1 tca|Tcan_16414.1 cel|CE_F58E10.3a
219	2	2	2	1	asu|AgR012_g242_t01 asu|AgR012_g277_t01 pun|PgR016_g082_t01 pun|PgR016_g110_t02 tca|Tcan_16156.1 tca|Tcan_16164.1 cel|CE_Y37E3.15a
220	2	1	2	2	asu|AgR012_g261_t05 asu|AgR028_g007_t03 cel|CE_C34F6.8 cel|CE_F59B8.2a tca|Tcan_07031.1 tca|Tcan_12245.1 pun|PgR092_g013_t01
221	2	2	2	1	asu|AgR015_g089_t04 asu|AgR015_g164_t01 pun|PgB16_g012_t05 pun|PgR156_g013_t01 tca|Tcan_06161.1 tca|Tcan_17584.1 cel|CE_E01G4.1a
222	2	2	2	1	asu|AgR017_g255_t01 asu|AgR017_g258_t01 pun|PgR047_g022_t01 pun|PgR047_g023_t04 cel|CE_C38C10.2 tca|Tcan_04921.1 tca|Tcan_02585.1
223	2	2	2	1	asu|AgR023_g088_t04 asu|AgR031_g129_t03 pun|PgR063X_g049_t01 pun|PgR131_g003_t02 tca|Tcan_03116.1 tca|Tcan_14933.1 cel|CE_F07A5.7a
224	3	2	1	1	asu|AgR024_g057_t06 asu|AgR026_g123_t01 asu|AgR026_g124_t02 pun|PgR039_g029_t04 pun|PgR071_g003_t04 cel|CE_T07D4.3 tca|Tcan_17308.1
225	3	1	1	2	asu|AgR027X_g034_t01 asu|AgR034_g015_t01 cel|CE_F02E8.6 cel|CE_F09G8.4 pun|PgR076_g022_t03 tca|Tcan_15343.1 asu|AgR034_g016_t01
226	3	1	2	1	asu|AgR028_g126_t02 asu|AgR028_g127_t07 pun|PgR112_g006_t01 tca|Tcan_11576.1 cel|CE_ZC247.1 asu|AgR028_g129_t01 tca|Tcan_05825.1
227	4	1	1	1	asu|AgR036X_g008_t19 asu|AgR036X_g010_t03 asu|AgR046_g003_t01 asu|AgB03_g343_t04 pun|PgR062_g062_t01 tca|Tcan_11489.1 cel|CE_F31C3.3
228	1	1	1	4	cel|CE_C06A6.4a cel|CE_C10C5.3 cel|CE_C10C5.4 cel|CE_C10C5.5 asu|AgR016_g234_t02 pun|PgR011_g121_t06 tca|Tcan_14495.1
229	1	1	2	3	cel|CE_C07H6.3 cel|CE_R107.6a cel|CE_ZC84.3 asu|AgR003_g177_t04 pun|PgR018_g021_t06 tca|Tcan_12423.1 tca|Tcan_12436.1
230	1	1	2	3	cel|CE_C08B6.4a cel|CE_R10D12.15a cel|CE_T26F2.1 tca|Tcan_10301.1 tca|Tcan_11641.1 asu|AgR010_g063_t06 pun|PgR006_g117_t01
231	1	2	2	2	cel|CE_C14F11.1a cel|CE_C44E4.3 pun|PgR038X_g076_t01 pun|PgR039_g095_t02 tca|Tcan_09764.1 tca|Tcan_13118.1 asu|AgR019X_g102_t02
232	1	1	1	4	cel|CE_C15A11.4 cel|CE_C15A11.7a cel|CE_F26A1.8 cel|CE_F26A1.6 asu|AgB06_g007_t01 pun|PgB03_g165_t02 tca|Tcan_16574.1
233	1	1	1	4	cel|CE_C16C10.3 cel|CE_R04A9.2 cel|CE_T22H9.3 cel|CE_Y49F6A.1 asu|AgR022_g169_t02 pun|PgR003_g223_t02 tca|Tcan_03456.1
234	1	1	3	2	cel|CE_C24A8.4 cel|CE_F14H12.4a tca|Tcan_03163.1 tca|Tcan_08118.1 asu|AgR012_g007_t05 pun|PgB19_g034_t02 tca|Tcan_02660.1
235	1	1	3	2	cel|CE_C25G4.10a cel|CE_T04A11.3 asu|AgR010_g252_t04 pun|PgR124_g006_t01 tca|Tcan_07339.1 tca|Tcan_07340.1 tca|Tcan_18590.1
236	1	1	1	4	cel|CE_C32D5.8a cel|CE_K02H11.6 cel|CE_T20D4.7 cel|CE_T28A11.13 asu|AgR083_g003_t03 pun|PgR020_g063_t04 tca|Tcan_15743.1
237	1	1	1	4	cel|CE_F09C8.1 cel|CE_W02B12.1 cel|CE_Y65B4BR.1 cel|CE_Y73B6BL.37 asu|AgR008_g056_t09 pun|PgR002_g122_t01 tca|Tcan_12109.1
238	1	1	1	4	cel|CE_F17E9.11 cel|CE_F58B3.1 cel|CE_F58B3.2 cel|CE_F58B3.3 asu|AgR069_g012_t01 pun|PgR020_g077_t01 tca|Tcan_04421.1
239	2	2	1	2	cel|CE_F26E4.12 cel|CE_R05H10.5a asu|AgR023_g117_t01 pun|PgR009X_g239_t02 asu|AgR054_g026_t01 pun|PgR090_g011_t02 tca|Tcan_11436.1
240	1	2	2	2	cel|CE_F29D10.4 cel|CE_T02C12.1 asu|AgR041_g074_t02 pun|PgR029_g059_t19 tca|Tcan_16940.1 pun|PgB09_g028_t02 tca|Tcan_14869.1
241	2	1	1	3	cel|CE_F43G6.5 cel|CE_T15H9.6 cel|CE_Y32F6A.3 asu|AgB05_g354_t01 pun|PgR057_g061_t01 tca|Tcan_03273.1 asu|AgB05_g355_t03
242	1	1	1	4	cel|CE_F58G1.1 cel|CE_R06C7.1 cel|CE_Y110A7A.18 cel|CE_ZK1248.7 asu|AgR038_g034_t04 pun|PgR028_g091_t02 tca|Tcan_16171.1
243	1	2	2	2	cel|CE_K05F1.6a cel|CE_ZK455.8a pun|PgB06_g014_t03 pun|PgR087_g024_t01 asu|AgB03_g145_t01 tca|Tcan_14827.1 tca|Tcan_14797.1
244	1	1	1	4	cel|CE_K12D9.1 cel|CE_R08E5.1a cel|CE_R08E5.3 cel|CE_R08F11.4 asu|AgR020_g020_t02 pun|PgR003_g080_t06 tca|Tcan_04565.1
245	1	2	2	2	cel|CE_R08F11.1a cel|CE_Y105E8A.10a asu|AgR013X_g128_t02 pun|PgR056X_g052_t01 tca|Tcan_07877.1 tca|Tcan_16558.1 pun|PgB05_g046_t06
246	1	1	3	2	cel|CE_ZK1055.6a cel|CE_ZK1055.7 tca|Tcan_04099.1 tca|Tcan_04102.1 tca|Tcan_04105.1 asu|AgB03_g281_t09 pun|PgR055_g042_t01
247	2	3	1	1	pun|PgB01_g098_t01 pun|PgB01_g099_t01 asu|AgR004_g222_t01 cel|CE_C40C9.1 tca|Tcan_13982.1 asu|AgR055_g001_t01 pun|PgB01_g100_t01
248	1	2	3	1	pun|PgB03_g125_t03 pun|PgE069_g002_t10 tca|Tcan_03397.1 tca|Tcan_08179.1 tca|Tcan_08745.1 asu|AgB06_g071_t01 cel|CE_T22D1.9
249	2	2	2	1	pun|PgB06_g062_t04 pun|PgR010_g031_t01 asu|AgB01_g674_t01 cel|CE_T10H9.5a tca|Tcan_10392.1 tca|Tcan_13211.1 asu|AgB03_g097_t03
250	2	2	2	1	pun|PgB07_g031_t01 pun|PgB07_g032_t01 asu|AgB05_g324_t04 cel|CE_F01E11.1 tca|Tcan_10662.1 asu|AgB05_g326_t01 tca|Tcan_14111.1
251	1	2	3	1	pun|PgB09_g100_t03 pun|PgR078_g004_t01 tca|Tcan_05218.1 tca|Tcan_12283.1 tca|Tcan_12278.1 asu|AgB31X_g005_t01 cel|CE_C07H6.5
252	1	2	2	2	pun|PgB10_g014_t01 pun|PgR003_g044_t02 asu|AgB07_g254_t04 cel|CE_Y113G7A.4a tca|Tcan_08274.1 cel|CE_C10G8.5a tca|Tcan_07768.1
253	2	2	2	1	pun|PgB13_g046_t01 pun|PgR001X_g003_t02 tca|Tcan_08202.1 tca|Tcan_16541.1 asu|AgR003_g109_t01 cel|CE_W07A8.2a asu|AgR041_g015_t01
254	3	2	1	1	pun|PgB22_g038_t01 pun|PgR035X_g068_t02 asu|AgE26_g005_t01 asu|AgR009X_g238_t03 tca|Tcan_14332.1 asu|AgR029_g147_t02 cel|CE_F01G4.6a
255	2	2	2	1	pun|PgR010_g030_t03 pun|PgR089_g050_t01 asu|AgB01_g673_t01 asu|AgR004_g020_t04 cel|CE_C54G10.3a tca|Tcan_10401.1 tca|Tcan_10897.1
256	2	2	2	1	pun|PgR014X_g080_t04 pun|PgR024_g010_t09 tca|Tcan_05538.1 tca|Tcan_12997.1 asu|AgB09X_g091_t04 asu|AgR059_g001_t10 cel|CE_F55C5.4
257	2	2	2	1	pun|PgR023_g080_t02 pun|PgR027_g113_t01 tca|Tcan_17512.1 tca|Tcan_17519.1 asu|AgR018X_g221_t02 cel|CE_Y37E3.17a asu|AgR029_g098_t02
258	2	1	3	1	tca|Tcan_04369.1 tca|Tcan_09580.1 tca|Tcan_04386.1 asu|AgR030_g061_t03 pun|PgR024_g098_t01 asu|AgR030_g062_t04 cel|CE_ZK1005.1a
259	2	2	2	1	tca|Tcan_06022.1 tca|Tcan_06953.1 asu|AgR002_g183_t06 pun|PgR021_g040_t04 asu|AgR014X_g200_t02 cel|CE_F52B5.1a pun|PgR022X_g059_t02
260	1	1	4	1	tca|Tcan_07183.1 tca|Tcan_07223.1 asu|AgR041_g035_t01 cel|CE_F54E2.3a pun|PgB13_g062_t11 tca|Tcan_07204.1 tca|Tcan_18235.1
261	2	1	3	1	tca|Tcan_08320.1 tca|Tcan_08328.1 tca|Tcan_08330.1 asu|AgB08X_g069_t01 pun|PgR009X_g078_t02 asu|AgB08X_g070_t01 cel|CE_Y73E7A.7a
262	2	1	3	1	tca|Tcan_10836.1 tca|Tcan_10841.1 asu|AgR018X_g265_t01 cel|CE_Y71A12B.4 pun|PgR062_g021_t02 tca|Tcan_05828.1 asu|AgR046_g012_t01
263	1	2	2	2	tca|Tcan_17281.1 tca|Tcan_17291.1 asu|AgR006_g319_t01 cel|CE_Y46G5A.26a pun|PgR004_g038_t01 cel|CE_H35N03.1 pun|PgR004_g039_t05
264	2	1	2	2	asu|AgB01_g590_t02 cel|CE_F49E8.1a pun|PgR015_g049_t09 tca|Tcan_10063.1 asu|AgB01_g591_t10 cel|CE_C42D4.8 tca|Tcan_10071.1
265	2	2	1	2	asu|AgB03_g454_t02 tca|Tcan_12287.1 asu|AgB03_g455_t02 cel|CE_W05B2.4 pun|PgR010_g101_t01 cel|CE_W05B2.7 pun|PgR010_g100_t01
266	2	2	1	2	asu|AgB07_g171_t01 cel|CE_M01F1.4a pun|PgR043_g022_t01 tca|Tcan_13702.1 asu|AgB07_g172_t01 cel|CE_M142.2 pun|PgR043_g023_t02
267	1	1	3	2	asu|AgB09X_g115_t01 cel|CE_C25H3.8 pun|PgR014X_g104_t04 tca|Tcan_18441.1 cel|CE_C25H3.11 tca|Tcan_18439.1 tca|Tcan_11573.1
268	2	1	3	1	asu|AgB12_g114_t01 cel|CE_B0511.12a pun|PgR027_g007_t11 tca|Tcan_05618.1 asu|AgR109_g002_t03 tca|Tcan_04509.1 tca|Tcan_05620.1
269	4	1	1	1	asu|AgB17_g096_t01 tca|Tcan_14730.1 asu|AgR007_g230_t01 pun|PgB08_g035_t01 asu|AgR023_g013_t01 cel|CE_ZC116.3 asu|AgR024_g023_t01
270	2	2	1	2	asu|AgB20_g024_t02 cel|CE_C06G3.9 pun|PgR049_g066_t04 tca|Tcan_04139.1 asu|AgB20_g025_t01 cel|CE_C06G3.10 pun|PgR049_g065_t02
271	2	2	1	2	asu|AgR002_g234_t01 cel|CE_F55A11.2 pun|PgB05_g011_t05 tca|Tcan_08517.1 asu|AgR002_g235_t01 cel|CE_F55A11.3 pun|PgB05_g010_t02
272	2	2	1	2	asu|AgR021X_g176_t05 pun|PgR144_g010_t02 asu|AgR021X_g177_t04 cel|CE_B0496.8 pun|PgR144_g009_t02 tca|Tcan_14592.1 cel|CE_Y54E10BR.1a
273	2	2	1	1	asu|AgB01_g111_t03 asu|AgE06_g014_t03 pun|PgE039_g005_t03 pun|PgR002_g200_t02 cel|CE_F52E4.1a tca|Tcan_04021.1
274	2	2	1	1	asu|AgB02_g286_t03 asu|AgR009X_g212_t01 pun|PgB32_g009_t05 pun|PgR035X_g047_t02 cel|CE_Y54E2A.11a tca|Tcan_15982.1
275	2	1	2	1	asu|AgB02_g451_t08 asu|AgB02_g452_t02 cel|CE_VC5.3a pun|PgR110_g009_t07 tca|Tcan_06397.1 tca|Tcan_00006.1
276	2	2	1	1	asu|AgB02_g473_t01 asu|AgB32_g006_t01 pun|PgB45_g001_t01 pun|PgR040_g089_t02 tca|Tcan_06106.1 cel|CE_H17B01.1a
277	2	2	1	1	asu|AgB05_g333_t03 asu|AgE09_g003_t02 pun|PgB07_g026_t01 pun|PgE062_g001_t02 tca|Tcan_03334.1 cel|CE_C05C10.6a
278	3	1	1	1	asu|AgB07_g086_t02 asu|AgR001_g593_t01 pun|PgR044_g075_t01 asu|AgB18_g032_t05 tca|Tcan_16190.1 cel|CE_F26F4.7
279	2	2	1	1	asu|AgB12_g119_t01 asu|AgE26_g001_t02 pun|PgB22_g044_t02 pun|PgR027_g006_t01 cel|CE_C44B7.10 tca|Tcan_18822.1
280	2	1	1	2	asu|AgB15X_g007_t06 asu|AgR017_g054_t01 cel|CE_F53H4.1 cel|CE_F53H4.6 pun|PgR194_g006_t03 tca|Tcan_04082.1
281	3	1	1	1	asu|AgB19_g078_t02 asu|AgE04_g018_t07 asu|AgR015_g188_t03 cel|CE_F26E4.5 pun|PgB05_g023_t01 tca|Tcan_08518.1
282	2	1	2	1	asu|AgB19_g094_t01 asu|AgR015_g179_t01 cel|CE_T03F6.6 pun|PgR026_g047_t02 tca|Tcan_08546.1 tca|Tcan_08513.1
283	2	2	1	1	asu|AgB29_g002_t01 asu|AgR051X_g018_t04 pun|PgB14X_g024_t02 pun|PgE228_g001_t01 tca|Tcan_15270.1 cel|CE_T07D4.4a
284	2	2	1	1	asu|AgE03_g023_t02 asu|AgR019X_g011_t05 pun|PgB12X_g061_t01 pun|PgE063_g002_t07 cel|CE_T23D8.4 tca|Tcan_09696.1
285	2	2	1	1	asu|AgE03_g025_t01 asu|AgR036X_g075_t02 pun|PgE117_g002_t03 pun|PgR001X_g216_t01 cel|CE_ZK829.7 tca|Tcan_18475.1
286	3	1	1	1	asu|AgE06_g007_t07 asu|AgE19_g001_t02 asu|AgR013X_g065_t01 cel|CE_F56A11.1 pun|PgR005X_g059_t01 tca|Tcan_05032.1
287	3	1	1	1	asu|AgE06_g020_t05 asu|AgR014X_g177_t08 asu|AgE20_g008_t04 pun|PgB02X_g018_t01 tca|Tcan_06425.1 cel|CE_H19N07.2a
288	2	2	1	1	asu|AgE06_g024_t02 asu|AgR009X_g047_t04 pun|PgB34_g005_t01 pun|PgR050X_g003_t01 cel|CE_DY3.2 tca|Tcan_14541.1
289	2	2	1	1	asu|AgE22_g009_t01 asu|AgR038_g064_t01 pun|PgE050_g001_t02 pun|PgR028_g062_t02 cel|CE_T25B9.1 tca|Tcan_05973.1
290	2	2	1	1	asu|AgE29_g002_t02 asu|AgR019X_g034_t02 cel|CE_H37N21.1 pun|PgB12X_g041_t02 pun|PgE035_g002_t08 tca|Tcan_09718.1
291	2	1	2	1	asu|AgR001_g008_t03 asu|AgR013X_g067_t03 cel|CE_C32F10.8a pun|PgR104_g007_t01 tca|Tcan_14752.1 tca|Tcan_05022.1
292	2	1	1	2	asu|AgR002_g102_t02 asu|AgR006_g379_t01 cel|CE_C06A1.1 cel|CE_C41C4.8 pun|PgR011_g181_t01 tca|Tcan_13216.1
293	2	1	2	1	asu|AgR002_g106_t02 asu|AgR121_g002_t03 tca|Tcan_04454.1 tca|Tcan_11535.1 cel|CE_T21B10.2a pun|PgR020_g068_t06
294	2	1	1	2	asu|AgR002_g192_t01 asu|AgR004_g063_t02 cel|CE_T01B11.5a cel|CE_T01B11.7 pun|PgR165_g011_t01 tca|Tcan_17761.1
295	2	1	1	2	asu|AgR002_g504_t02 asu|AgR021X_g155_t01 cel|CE_C52B9.7a cel|CE_W03G9.6 pun|PgB01_g075_t02 tca|Tcan_15579.1
296	2	1	2	1	asu|AgR007_g313_t01 asu|AgR012_g246_t05 tca|Tcan_11301.1 tca|Tcan_16144.1 cel|CE_R11E3.8a pun|PgR045_g063_t01
297	2	1	2	1	asu|AgR009X_g001_t01 asu|AgR023_g079_t01 pun|PgR063X_g040_t02 tca|Tcan_14954.1 tca|Tcan_14959.1 cel|CE_M04F3.5a
298	2	2	1	1	asu|AgR011_g154_t02 asu|AgR026_g164_t02 pun|PgR008_g037_t04 pun|PgR008_g038_t09 cel|CE_F25B5.6a tca|Tcan_16998.1
299	3	1	1	1	asu|AgR020_g158_t01 asu|AgR020_g159_t01 cel|CE_Y66D12A.14 pun|PgR085_g002_t01 asu|AgR020_g160_t02 tca|Tcan_11658.1
300	2	1	2	1	asu|AgR054_g004_t01 asu|AgR054_g008_t03 pun|PgB19_g021_t01 tca|Tcan_05720.1 cel|CE_BE0003N10.1 tca|Tcan_05745.1
301	1	1	2	2	cel|CE_B0244.8 cel|CE_R01H2.3 tca|Tcan_15963.1 tca|Tcan_15969.1 asu|AgR009X_g182_t01 pun|PgR001X_g171_t01
302	2	1	1	2	cel|CE_B0495.2 cel|CE_ZC504.3 asu|AgR024_g095_t01 tca|Tcan_13620.1 asu|AgR024_g096_t04 pun|PgR039_g061_t01
303	1	1	1	3	cel|CE_C01B4.9a cel|CE_M03B6.2 cel|CE_Y19D10A.12a asu|AgB02_g172_t01 pun|PgR017X_g101_t01 tca|Tcan_07059.1
304	1	1	1	3	cel|CE_C01F6.5 cel|CE_F23B2.6 cel|CE_M18.7a asu|AgR036X_g064_t01 pun|PgR208X_g004_t01 tca|Tcan_15667.1
305	1	1	1	3	cel|CE_C01G10.14 cel|CE_C25D7.1 cel|CE_K07F5.7 asu|AgB12_g040_t02 pun|PgB18_g011_t03 tca|Tcan_16106.1
306	1	1	1	3	cel|CE_C03C10.2 cel|CE_T19D12.5 cel|CE_ZK666.8 asu|AgR003_g153_t02 pun|PgR042_g103_t01 tca|Tcan_11019.1
307	1	1	2	2	cel|CE_C04F5.7 cel|CE_C07G3.9a tca|Tcan_13680.1 tca|Tcan_13693.1 asu|AgR028_g045_t01 pun|PgR128_g002_t01
308	1	1	2	2	cel|CE_C06G8.2 cel|CE_K04E7.2 tca|Tcan_16088.1 tca|Tcan_16107.1 asu|AgB12_g038_t02 pun|PgB18_g012_t01
309	1	1	1	3	cel|CE_C07A4.2 cel|CE_C07A4.3 cel|CE_D2062.1 asu|AgB15X_g087_t02 pun|PgR119X_g005_t01 tca|Tcan_07609.1
310	1	1	1	3	cel|CE_C09C7.1 cel|CE_C14F5.2 cel|CE_F42F12.2 asu|AgR003_g136_t01 pun|PgR001X_g239_t01 tca|Tcan_10677.1
311	1	1	2	2	cel|CE_C09F12.1 cel|CE_T05A10.2 asu|AgR037_g113_t07 pun|PgR073_g003_t06 tca|Tcan_05075.1 tca|Tcan_18275.1
312	1	1	1	3	cel|CE_C10C6.5 cel|CE_C16C10.12a cel|CE_T26A5.1 asu|AgR009X_g236_t01 pun|PgB10_g063_t04 tca|Tcan_14368.1
313	1	1	1	3	cel|CE_C14B9.4a cel|CE_F55G1.8 cel|CE_Y71F9B.7 asu|AgR004_g053_t01 pun|PgR025_g007_t01 tca|Tcan_12878.1
314	1	1	1	3	cel|CE_C18E9.11a cel|CE_Y37A1B.12 cel|CE_Y37A1B.13 asu|AgR006_g280_t04 pun|PgR040_g021_t01 tca|Tcan_06121.1
315	1	1	2	2	cel|CE_C25G4.6 cel|CE_T21G5.4 asu|AgR039_g067_t03 pun|PgR043_g094_t01 tca|Tcan_08461.1 tca|Tcan_13289.1
316	1	1	1	3	cel|CE_C28D4.3 cel|CE_F26D10.10 cel|CE_K03H1.1 asu|AgB05_g017_t01 pun|PgR015_g018_t03 tca|Tcan_18427.1
317	1	1	1	3	cel|CE_C29F3.2 cel|CE_ZK1037.10 cel|CE_ZK678.5 asu|AgR057_g036_t10 pun|PgR066_g009_t04 tca|Tcan_18550.1
318	1	1	1	3	cel|CE_C29F7.1 cel|CE_C29F7.2a cel|CE_ZK1037.4a asu|AgR004_g075_t01 pun|PgR125_g001_t02 tca|Tcan_16860.1
319	2	1	1	2	cel|CE_C34D4.2 cel|CE_F23B12.1 asu|AgE01_g035_t04 asu|AgR003_g166_t03 pun|PgR018_g010_t03 tca|Tcan_15816.1
320	1	1	1	3	cel|CE_C34D4.3 cel|CE_ZK1307.3 cel|CE_ZK1307.4 asu|AgR031_g066_t01 pun|PgR046_g038_t01 tca|Tcan_13347.1
321	1	1	1	3	cel|CE_C36F7.5 cel|CE_F42H11.1 cel|CE_K07A1.5 asu|AgR004_g351_t03 pun|PgR020_g082_t02 tca|Tcan_17883.1
322	1	1	1	3	cel|CE_C37H5.9a cel|CE_K09C8.3a cel|CE_K11G12.1a asu|AgB05_g269_t01 pun|PgB01_g171_t02 tca|Tcan_14398.1
323	1	1	2	2	cel|CE_C42C1.11a cel|CE_ZC416.6a asu|AgR005_g146_t02 pun|PgR010_g191_t05 tca|Tcan_07276.1 tca|Tcan_13080.1
324	1	1	1	3	cel|CE_C44C10.3 cel|CE_K11D9.3 cel|CE_T12B3.2 asu|AgR022_g114_t01 pun|PgR003_g169_t01 tca|Tcan_13262.1
325	2	1	1	2	cel|CE_C46F4.2 cel|CE_F37C12.7 asu|AgB18_g009_t02 pun|PgR044_g096_t01 tca|Tcan_18947.1 asu|AgB18_g010_t04
326	1	1	2	2	cel|CE_C48A7.1a cel|CE_T02C5.5a tca|Tcan_07655.1 tca|Tcan_12717.1 asu|AgR007_g282_t05 pun|PgR028_g009_t01
327	1	1	1	3	cel|CE_C56A3.2a cel|CE_T07C12.7 cel|CE_JC8.14 asu|AgR059_g036_t01 pun|PgR024_g050_t01 tca|Tcan_06354.1
328	1	1	1	3	cel|CE_D1053.1 cel|CE_Y71F9AL.5 cel|CE_Y53G8B.1 asu|AgB01_g578_t01 pun|PgR015_g059_t02 tca|Tcan_15107.1
329	1	1	1	3	cel|CE_F11A5.10 cel|CE_R11G10.1a asu|AgB19_g075_t09 cel|CE_ZC317.3 pun|PgB05_g069_t01 tca|Tcan_16956.1
330	1	1	2	2	cel|CE_F18H3.3a cel|CE_Y106G6H.2a tca|Tcan_05835.1 tca|Tcan_09508.1 asu|AgE04_g024_t03 pun|PgR105_g013_t01
331	1	1	1	3	cel|CE_F20B4.6 cel|CE_F59G1.1a cel|CE_T06C12.10 asu|AgR004_g390_t02 pun|PgB20_g053_t05 tca|Tcan_11921.1
332	1	1	2	2	cel|CE_F21F3.3 cel|CE_M01E11.1 tca|Tcan_06139.1 tca|Tcan_06143.1 asu|AgR001_g415_t01 pun|PgR261_g002_t02
333	1	1	1	3	cel|CE_F22B8.7 cel|CE_F53E10.1 cel|CE_F56A11.5a asu|AgB06_g131_t02 pun|PgB03_g072_t01 tca|Tcan_15360.1
334	1	1	2	2	cel|CE_F26F12.7 cel|CE_T14G8.1 asu|AgR015_g132_t01 pun|PgR139_g012_t09 tca|Tcan_09875.1 tca|Tcan_09867.1
335	1	1	1	3	cel|CE_F27C8.6 cel|CE_T09B9.1 cel|CE_Y43F8A.3a asu|AgB03_g006_t01 pun|PgE037_g003_t01 tca|Tcan_04321.1
336	1	1	1	3	cel|CE_F37F2.3 cel|CE_R107.7 cel|CE_T28A11.11 asu|AgB01_g272_t02 pun|PgB04_g156_t05 tca|Tcan_11418.1
337	1	1	1	3	cel|CE_F41E7.1 cel|CE_F41E7.2 cel|CE_F57G8.5 asu|AgB13X_g028_t01 pun|PgR005X_g183_t01 tca|Tcan_12525.1
338	1	2	1	2	cel|CE_F43G9.6a cel|CE_T05E8.1 asu|AgE02_g034_t08 pun|PgE089_g002_t08 tca|Tcan_09269.1 pun|PgE032_g001_t02
339	1	2	1	2	cel|CE_F46A9.4 cel|CE_F46A9.5 asu|AgB05_g152_t04 pun|PgR012_g185_t01 tca|Tcan_13950.1 pun|PgR067_g027_t03
340	1	1	1	3	cel|CE_F48F7.1a cel|CE_T07D3.7a cel|CE_T23D8.7 asu|AgR002_g431_t02 pun|PgB01_g011_t01 tca|Tcan_09121.1
341	1	1	2	2	cel|CE_F52D10.1 cel|CE_F57F10.1a asu|AgR042X_g030_t05 pun|PgR001X_g299_t01 tca|Tcan_09855.1 tca|Tcan_09842.1
342	1	1	2	2	cel|CE_F53C3.12 cel|CE_Y46G5A.24 tca|Tcan_11916.1 tca|Tcan_13442.1 asu|AgB12_g127_t01 pun|PgR191_g003_t03
343	1	1	1	3	cel|CE_F59A6.4 cel|CE_H05L14.1 cel|CE_T05A7.6 asu|AgB11_g016_t02 pun|PgR042_g024_t01 tca|Tcan_12464.1
344	1	1	1	3	cel|CE_F59F3.1 cel|CE_F59F3.5 cel|CE_T17A3.1 asu|AgB15X_g069_t01 pun|PgR119X_g020_t02 tca|Tcan_10872.1
345	1	1	1	3	cel|CE_H31G24.4 cel|CE_Y43E12A.1 cel|CE_ZC168.4 asu|AgR002_g242_t01 pun|PgB05_g006_t01 tca|Tcan_08528.1
346	1	1	1	3	cel|CE_K07E3.7a cel|CE_W08D2.5a cel|CE_Y59H11AR.2a asu|AgR014X_g003_t03 pun|PgB02X_g191_t01 tca|Tcan_12783.1
347	1	1	1	3	cel|CE_K12H6.3 cel|CE_T05A7.10 cel|CE_T05A7.5 asu|AgB06_g155_t01 pun|PgR163_g002_t04 tca|Tcan_11610.1
348	1	1	2	2	cel|CE_R03E1.3 cel|CE_Y58G8A.1 asu|AgR058_g009_t01 pun|PgR006_g054_t01 tca|Tcan_11109.1 tca|Tcan_11117.1
349	1	1	1	3	cel|CE_R06C1.4 cel|CE_R09B3.2 cel|CE_R09B3.3 asu|AgR018X_g230_t01 pun|PgR023_g090_t01 tca|Tcan_11179.1
350	1	1	1	3	cel|CE_R13A5.3 cel|CE_T19C3.9 cel|CE_R13A5.6 asu|AgR001_g585_t01 pun|PgR069_g041_t02 tca|Tcan_09248.1
351	1	1	1	3	cel|CE_T05A1.5a cel|CE_T22F7.1 asu|AgR013X_g204_t03 cel|CE_B0252.3a pun|PgR052_g069_t03 tca|Tcan_03002.1
352	1	1	1	3	cel|CE_T07C4.5 cel|CE_Y5F2A.1 cel|CE_Y5F2A.2 asu|AgR036X_g078_t01 pun|PgR001X_g212_t01 tca|Tcan_07555.1
353	1	1	1	3	cel|CE_T11G6.2a cel|CE_T11G6.3 cel|CE_T11G6.4 asu|AgR036X_g053_t02 pun|PgR095X_g036_t01 tca|Tcan_09360.1
354	1	2	1	2	cel|CE_T12A7.1 cel|CE_T28F3.1a asu|AgB02_g062_t01 pun|PgR007_g062_t01 tca|Tcan_07687.1 pun|PgR076_g003_t05
355	2	1	1	2	cel|CE_T28F3.5a cel|CE_W09B6.1a asu|AgB22X_g052_t01 pun|PgR005X_g171_t01 tca|Tcan_13723.1 asu|AgB22X_g053_t03
356	1	2	1	2	cel|CE_Y47G6A.12 cel|CE_ZK430.5 pun|PgR043_g037_t02 pun|PgR241X_g001_t01 asu|AgR039_g120_t02 tca|Tcan_13167.1
357	1	2	1	2	cel|CE_Y48E1B.8 cel|CE_Y57G11C.31 pun|PgB07_g078_t01 pun|PgB07_g079_t01 asu|AgB05_g392_t01 tca|Tcan_08082.1
358	1	2	2	1	pun|PgB01_g113_t01 pun|PgB02X_g124_t01 tca|Tcan_04500.1 tca|Tcan_09108.1 asu|AgR055_g022_t04 cel|CE_F38H4.9
359	1	2	2	1	pun|PgB10_g027_t01 pun|PgR004_g035_t01 asu|AgR002_g398_t01 cel|CE_C03C10.3 tca|Tcan_16829.1 tca|Tcan_11935.1
360	2	2	1	1	pun|PgE007_g004_t01 pun|PgE024_g001_t01 asu|AgE45_g004_t04 asu|AgR005_g034_t04 cel|CE_C49H3.11 tca|Tcan_13759.1
361	1	2	2	1	pun|PgE027_g003_t01 pun|PgR007_g182_t03 tca|Tcan_07427.1 tca|Tcan_15198.1 asu|AgR005_g387_t03 cel|CE_Y47D3A.26a
362	1	2	2	1	pun|PgR002_g052_t04 pun|PgR015_g084_t03 tca|Tcan_04006.1 tca|Tcan_12102.1 asu|AgB01_g533_t09 cel|CE_K10B2.1a
363	1	2	2	1	pun|PgR003_g068_t03 pun|PgR047_g036_t01 tca|Tcan_03222.1 tca|Tcan_13146.1 asu|AgR017_g238_t01 cel|CE_T20G5.2
364	1	2	2	1	pun|PgR006_g147_t01 pun|PgR024_g052_t01 tca|Tcan_06380.1 tca|Tcan_11111.1 asu|AgR010_g099_t01 cel|CE_ZK265.3
365	1	3	1	1	pun|PgR007_g075_t01 pun|PgR007_g083_t01 asu|AgB02_g037_t04 tca|Tcan_06317.1 cel|CE_K11G12.6a pun|PgR007_g084_t01
366	1	3	1	1	pun|PgR009X_g196_t01 pun|PgR009X_g197_t01 asu|AgR001_g602_t01 cel|CE_Y61A9LA.1 pun|PgR064_g023_t01 tca|Tcan_05883.1
367	1	2	2	1	pun|PgR012_g057_t02 pun|PgR047_g039_t05 tca|Tcan_11013.1 tca|Tcan_13135.1 asu|AgB10_g195_t01 cel|CE_Y22D7AL.5a
368	1	2	2	1	pun|PgR015_g150_t01 pun|PgR106_g025_t01 tca|Tcan_11838.1 tca|Tcan_18157.1 asu|AgB23_g004_t01 cel|CE_F58D5.1a
369	1	2	2	1	pun|PgR019_g068_t01 pun|PgR050X_g010_t01 tca|Tcan_03589.1 tca|Tcan_17722.1 asu|AgR009X_g056_t02 cel|CE_F29F11.1
370	1	2	2	1	pun|PgR024_g087_t01 pun|PgR041_g036_t01 tca|Tcan_07522.1 tca|Tcan_18350.1 asu|AgR030_g051_t01 cel|CE_K04D7.3a
371	2	2	1	1	pun|PgR024_g099_t03 pun|PgR024_g100_t03 asu|AgR030_g065_t01 cel|CE_F23B12.5 tca|Tcan_04378.1 asu|AgR073_g007_t05
372	2	2	1	1	pun|PgR028_g002_t01 pun|PgR159_g006_t01 asu|AgR007_g289_t03 cel|CE_C08G9.2 tca|Tcan_07640.1 asu|AgR007_g290_t02
373	2	2	1	1	pun|PgR032X_g096_t02 pun|PgR041_g010_t01 asu|AgR010_g227_t01 asu|AgR018X_g020_t02 cel|CE_Y66H1B.4 tca|Tcan_07490.1
374	2	2	1	1	pun|PgR042_g029_t03 pun|PgR052_g039_t01 asu|AgB11_g021_t02 cel|CE_Y75B8A.24 tca|Tcan_13904.1 asu|AgB11_g022_t01
375	1	3	1	1	pun|PgR047_g007_t03 pun|PgR140_g016_t01 asu|AgB01_g729_t01 cel|CE_C06A5.1 pun|PgB08_g002_t01 tca|Tcan_17616.1
376	1	2	2	1	pun|PgR057_g006_t01 pun|PgR338_g001_t01 tca|Tcan_05990.1 tca|Tcan_05994.1 asu|AgR016_g075_t01 cel|CE_Y63D3A.7
377	1	2	2	1	pun|PgR062_g036_t01 pun|PgR062_g037_t01 tca|Tcan_03722.1 tca|Tcan_15280.1 asu|AgR066_g008_t01 cel|CE_Y53F4B.18
378	2	2	1	1	pun|PgR097_g016_t01 pun|PgR097_g017_t02 asu|AgB04_g070_t01 tca|Tcan_06343.1 asu|AgB04_g071_t01 cel|CE_C41G7.5a
379	2	2	1	1	pun|PgR131_g002_t05 pun|PgR219_g007_t02 asu|AgB15X_g124_t01 tca|Tcan_03118.1 asu|AgR031_g130_t04 cel|CE_C32E8.11
380	1	3	1	1	pun|PgR162X_g001_t04 pun|PgR199X_g001_t01 pun|PgR346_g001_t01 cel|CE_C50F2.10 asu|AgR032_g063_t03 tca|Tcan_09651.1
381	1	1	3	1	tca|Tcan_00415.1 tca|Tcan_01180.1 tca|Tcan_01181.1 asu|AgR010_g219_t01 cel|CE_ZK593.7 pun|PgR041_g014_t01
382	1	1	3	1	tca|Tcan_02652.1 tca|Tcan_18622.1 asu|AgB02_g097_t03 cel|CE_F58H7.3 pun|PgR017X_g020_t01 tca|Tcan_02648.1
383	1	1	3	1	tca|Tcan_03553.1 tca|Tcan_08343.1 asu|AgR039_g047_t01 cel|CE_F47D12.1a pun|PgR029_g113_t01 tca|Tcan_08462.1
384	2	1	2	1	tca|Tcan_05945.1 tca|Tcan_07642.1 asu|AgR038_g055_t03 cel|CE_H04M03.4 asu|AgR044_g047_t01 pun|PgR028_g067_t02
385	2	1	2	1	tca|Tcan_06123.1 tca|Tcan_06136.1 asu|AgB05_g402_t01 asu|AgB05_g403_t01 cel|CE_F54D5.15a pun|PgB07_g088_t01
386	1	1	3	1	tca|Tcan_08619.1 tca|Tcan_08620.1 asu|AgR004_g066_t03 cel|CE_Y57G11C.22a pun|PgR165_g008_t01 tca|Tcan_02291.1
387	2	1	2	1	tca|Tcan_10131.1 tca|Tcan_10500.1 asu|AgR031_g052_t05 cel|CE_T05D4.1 pun|PgR048_g006_t01 asu|AgR045_g010_t01
388	1	2	2	1	tca|Tcan_10778.1 tca|Tcan_10816.1 asu|AgR001_g431_t03 pun|PgR060_g009_t02 cel|CE_K07C11.4 pun|PgR060_g008_t01
389	1	1	3	1	tca|Tcan_11563.1 tca|Tcan_11566.1 asu|AgB08X_g199_t04 cel|CE_F26H11.2a pun|PgR009X_g211_t01 tca|Tcan_11564.1
390	1	2	2	1	tca|Tcan_11647.1 tca|Tcan_11659.1 asu|AgR058_g014_t01 cel|CE_ZK688.2 pun|PgR006_g058_t01 pun|PgR006_g122_t01
391	2	1	2	1	tca|Tcan_15742.1 tca|Tcan_17795.1 asu|AgR011_g311_t01 cel|CE_F21D12.3 pun|PgR020_g028_t01 asu|AgR060_g012_t02
392	1	2	2	1	asu|AgB01_g410_t04 cel|CE_T04A8.9 pun|PgR048_g062_t01 tca|Tcan_10730.1 pun|PgR048_g063_t01 tca|Tcan_10725.1
393	1	1	2	2	asu|AgB01_g482_t05 cel|CE_C06G1.5a pun|PgR015_g126_t02 tca|Tcan_02814.1 cel|CE_C06G1.6 tca|Tcan_10356.1
394	2	2	1	1	asu|AgB01_g616_t02 pun|PgR017X_g034_t02 pun|PgR142_g004_t05 tca|Tcan_04941.1 asu|AgB19_g068_t01 cel|CE_Y57A10A.31
395	1	3	1	1	asu|AgB01_g734_t01 cel|CE_Y48G9A.3 pun|PgE370_g001_t01 tca|Tcan_13791.1 pun|PgR029_g089_t04 pun|PgR029_g090_t02
396	2	2	1	1	asu|AgB02_g415_t03 tca|Tcan_15429.1 asu|AgB02_g416_t01 cel|CE_F25D1.2 pun|PgR033_g071_t01 pun|PgR033_g070_t01
397	2	1	2	1	asu|AgB03_g185_t04 tca|Tcan_18488.1 asu|AgB03_g187_t03 cel|CE_T05C12.7 pun|PgR239_g002_t01 tca|Tcan_18481.1
398	1	1	2	2	asu|AgB03_g393_t01 cel|CE_R13A5.9 pun|PgR078_g008_t03 tca|Tcan_07449.1 tca|Tcan_12492.1 cel|CE_T07C4.11a
399	3	1	1	1	asu|AgB03_g394_t01 tca|Tcan_12466.1 asu|AgB03_g395_t01 pun|PgR078_g007_t02 asu|AgB03_g396_t01 cel|CE_C24H11.8a
400	2	1	2	1	asu|AgB03_g502_t02 tca|Tcan_07482.1 asu|AgR033_g011_t01 cel|CE_F11E6.5 pun|PgR041_g044_t05 tca|Tcan_12522.1
401	2	1	2	1	asu|AgB04_g027_t01 cel|CE_B0041.7 pun|PgR018_g067_t04 tca|Tcan_15553.1 asu|AgB04_g028_t01 tca|Tcan_08493.1
402	2	1	2	1	asu|AgB04_g045_t01 pun|PgR018_g054_t03 tca|Tcan_13556.1 asu|AgB04_g046_t02 cel|CE_F09C3.1 tca|Tcan_15394.1
403	2	1	2	1	asu|AgB04_g343_t05 cel|CE_W05F2.4a pun|PgR088_g030_t01 tca|Tcan_09901.1 asu|AgB04_g344_t05 tca|Tcan_09898.1
404	1	2	2	1	asu|AgB05_g297_t08 cel|CE_F19H6.1 pun|PgB01_g146_t02 tca|Tcan_17388.1 pun|PgB01_g147_t01 tca|Tcan_17402.1
405	1	2	2	1	asu|AgB07_g107_t05 pun|PgR075_g029_t02 pun|PgR075_g031_t04 tca|Tcan_17961.1 tca|Tcan_17962.1 cel|CE_T06E4.3a
406	1	2	2	1	asu|AgB08X_g160_t06 cel|CE_Y64G10A.7a pun|PgR009X_g169_t01 tca|Tcan_06587.1 tca|Tcan_17936.1 pun|PgR009X_g172_t01
407	2	1	2	1	asu|AgB12_g007_t06 pun|PgB18_g043_t04 tca|Tcan_10997.1 asu|AgB12_g008_t04 cel|CE_Y71D11A.1 tca|Tcan_08570.1
408	1	1	3	1	asu|AgB17_g013_t01 cel|CE_ZK617.1a pun|PgR041_g030_t01 tca|Tcan_06696.1 tca|Tcan_06698.1 tca|Tcan_06699.1
409	2	1	2	1	asu|AgB23_g047_t01 cel|CE_C06B8.7 pun|PgB16_g035_t01 tca|Tcan_11223.1 asu|AgB23_g048_t13 tca|Tcan_11075.1
410	2	2	1	1	asu|AgB25_g005_t01 cel|CE_C05D11.1 pun|PgR096_g003_t01 tca|Tcan_14711.1 asu|AgB25_g006_t02 pun|PgR019_g129_t02
411	1	2	1	2	asu|AgB25_g023_t05 cel|CE_Y32H12A.2a pun|PgB29_g007_t01 tca|Tcan_17026.1 cel|CE_F42A10.2a pun|PgB29_g006_t01
412	2	2	1	1	asu|AgR001_g254_t02 cel|CE_Y45F10B.10a pun|PgR041_g048_t01 tca|Tcan_18335.1 asu|AgR001_g255_t02 pun|PgR041_g049_t01
413	3	1	1	1	asu|AgR001_g315_t09 cel|CE_C34E11.3a pun|PgR031_g063_t01 tca|Tcan_13518.1 asu|AgR001_g319_t02 asu|AgR012_g284_t02
414	2	2	1	1	asu|AgR001_g474_t05 pun|PgR049_g010_t01 asu|AgR024_g122_t01 cel|CE_F32H2.3 pun|PgB35_g001_t02 tca|Tcan_14523.1
415	2	2	1	1	asu|AgR001_g565_t01 cel|CE_F53B7.2a pun|PgR061_g043_t01 tca|Tcan_07525.1 asu|AgR001_g568_t01 pun|PgR061_g044_t02
416	1	2	2	1	asu|AgR002_g214_t02 cel|CE_C50F4.8 pun|PgB05_g094_t01 tca|Tcan_12578.1 pun|PgB05_g095_t01 tca|Tcan_12570.1
417	2	1	2	1	asu|AgR002_g345_t05 cel|CE_C34D4.14a pun|PgB23_g005_t04 tca|Tcan_15397.1 asu|AgR002_g346_t05 tca|Tcan_15402.1
418	2	1	2	1	asu|AgR002_g399_t01 cel|CE_K09C4.8 tca|Tcan_16817.1 asu|AgR002_g401_t03 pun|PgB10_g028_t01 tca|Tcan_07880.1
419	1	2	1	2	asu|AgR003_g279_t07 cel|CE_T10F2.4 pun|PgR030_g055_t01 tca|Tcan_15336.1 cel|CE_W09D6.6 pun|PgR030_g056_t02
420	1	1	2	2	asu|AgR003_g308_t12 cel|CE_Y67H2A.7a pun|PgR248_g004_t02 tca|Tcan_05906.1 tca|Tcan_05919.1 cel|CE_Y67H2A.6a
421	1	2	1	2	asu|AgR004_g184_t01 cel|CE_F43H9.3 pun|PgR133_g005_t01 tca|Tcan_15608.1 cel|CE_C53A5.16a pun|PgR133_g004_t02
422	2	2	1	1	asu|AgR004_g358_t01 pun|PgR022X_g017_t01 asu|AgR004_g359_t02 cel|CE_F55C12.5a pun|PgR022X_g019_t02 tca|Tcan_15771.1
423	1	2	2	1	asu|AgR005_g110_t04 cel|CE_Y110A7A.16 pun|PgR010_g159_t01 tca|Tcan_17222.1 tca|Tcan_18980.1 pun|PgR010_g158_t01
424	2	1	2	1	asu|AgR005_g213_t02 cel|CE_R10E11.1a pun|PgR025_g053_t07 tca|Tcan_06947.1 asu|AgR005_g216_t02 tca|Tcan_06948.1
425	2	2	1	1	asu|AgR006_g046_t05 cel|CE_T19D7.7 pun|PgR065_g005_t01 tca|Tcan_04772.1 asu|AgR006_g056_t01 pun|PgR121_g002_t01
426	1	1	3	1	asu|AgR007_g139_t05 pun|PgR053_g053_t02 tca|Tcan_15802.1 cel|CE_ZK524.2a tca|Tcan_15807.1 tca|Tcan_15808.1
427	2	1	1	2	asu|AgR008_g277_t01 cel|CE_T16G1.11 pun|PgR013_g026_t01 tca|Tcan_14661.1 asu|AgR008_g278_t03 cel|CE_T16G1.9
428	2	1	2	1	asu|AgR009X_g247_t01 pun|PgR035X_g076_t01 tca|Tcan_02425.1 asu|AgR009X_g248_t01 cel|CE_C52B9.9 tca|Tcan_02537.1
429	1	3	1	1	asu|AgR011_g063_t12 cel|CE_F11C1.5a pun|PgR206_g003_t01 tca|Tcan_18563.1 pun|PgR206_g007_t01 pun|PgE307_g001_t01
430	3	1	1	1	asu|AgR011_g069_t02 cel|CE_F46H5.7a pun|PgR077_g019_t14 tca|Tcan_08746.1 asu|AgR011_g070_t21 asu|AgR011_g072_t01
431	2	1	2	1	asu|AgR011_g206_t01 pun|PgR034_g080_t03 tca|Tcan_03128.1 asu|AgR011_g207_t01 cel|CE_Y47D3A.29a tca|Tcan_00433.1
432	1	2	2	1	asu|AgR014X_g095_t01 cel|CE_K01A12.3 pun|PgB02X_g110_t01 tca|Tcan_04503.1 pun|PgB02X_g108_t01 tca|Tcan_04501.1
433	2	2	1	1	asu|AgR017_g260_t06 cel|CE_B0365.7 pun|PgR047_g019_t01 tca|Tcan_04395.1 asu|AgR017_g263_t02 pun|PgR047_g016_t01
434	2	2	1	1	asu|AgR018X_g092_t01 cel|CE_Y73F8A.5 pun|PgR032X_g035_t01 tca|Tcan_03178.1 asu|AgR018X_g093_t01 pun|PgR032X_g033_t01
435	2	1	1	2	asu|AgR018X_g164_t01 cel|CE_F30A10.8 pun|PgR023_g023_t02 tca|Tcan_13119.1 asu|AgR018X_g167_t02 cel|CE_C47B2.6a
436	1	1	3	1	asu|AgR022_g208_t03 cel|CE_F13E9.1 pun|PgR003_g255_t01 tca|Tcan_18775.1 tca|Tcan_02449.1 tca|Tcan_18751.1
437	1	2	2	1	asu|AgR024_g060_t08 tca|Tcan_10130.1 cel|CE_C23F12.1a pun|PgR039_g033_t01 tca|Tcan_10129.1 pun|PgR039_g032_t07
438	2	2	1	1	asu|AgR024_g155_t03 cel|CE_Y38F2AR.5a pun|PgB02X_g182_t01 tca|Tcan_11479.1 asu|AgR066_g019_t01 pun|PgR062_g064_t01
439	1	2	1	2	asu|AgR026_g031_t06 cel|CE_T07H6.4 pun|PgR102_g028_t01 tca|Tcan_05183.1 cel|CE_T07H6.5 pun|PgR102_g030_t01
440	2	2	1	1	asu|AgR026_g059_t01 cel|CE_F59C12.3 pun|PgR068_g009_t01 tca|Tcan_17549.1 asu|AgR026_g060_t01 pun|PgR068_g010_t01
441	2	2	1	1	asu|AgR028_g128_t01 cel|CE_K07C11.9 pun|PgR021_g027_t01 asu|AgR050_g007_t14 pun|PgR021_g028_t02 tca|Tcan_09512.1
442	2	1	2	1	asu|AgR030_g027_t02 cel|CE_W04D2.1a pun|PgR024_g074_t01 tca|Tcan_17496.1 asu|AgR030_g028_t06 tca|Tcan_17495.1
443	1	2	2	1	asu|AgR031_g085_t01 cel|CE_CC4.3 pun|PgR046_g022_t03 pun|PgR046_g023_t05 tca|Tcan_06193.1 tca|Tcan_10104.1
444	2	2	1	1	asu|AgR035X_g096_t02 pun|PgR005X_g129_t03 tca|Tcan_04221.1 asu|AgR035X_g097_t05 cel|CE_F15D3.1a pun|PgR005X_g130_t02
445	2	1	2	1	asu|AgR037_g110_t01 tca|Tcan_05084.1 asu|AgR037_g112_t01 cel|CE_T25E12.4a pun|PgR073_g002_t02 tca|Tcan_05094.1
446	2	2	1	1	asu|AgR040X_g004_t02 cel|CE_C02F12.7 pun|PgR083X_g001_t01 tca|Tcan_08401.1 asu|AgR040X_g016_t01 pun|PgR328X_g001_t02
447	1	2	2	1	asu|AgR041_g019_t09 cel|CE_Y32G9A.6a pun|PgB13_g049_t01 tca|Tcan_05071.1 tca|Tcan_05063.1 pun|PgB13_g050_t01
448	2	1	2	1	asu|AgR041_g084_t01 cel|CE_C44F1.5 tca|Tcan_01988.1 asu|AgR043_g032_t02 pun|PgR029_g067_t01 tca|Tcan_01987.1
449	2	2	1	1	asu|AgR043_g010_t02 pun|PgR019_g002_t04 tca|Tcan_03231.1 asu|AgR043_g011_t01 cel|CE_F52B5.3 pun|PgR019_g004_t01
450	2	1	2	1	asu|AgR044_g057_t04 pun|PgR184_g003_t02 tca|Tcan_04547.1 asu|AgR044_g059_t02 cel|CE_T04C9.1a tca|Tcan_04540.1
451	2	1	1	1	asu|AgB01_g161_t01 asu|AgR011_g313_t01 cel|CE_F18E2.2 pun|PgR031_g067_t02 tca|Tcan_13823.1
452	2	1	1	1	asu|AgB01_g738_t01 asu|AgR059_g034_t02 cel|CE_E02C12.4 pun|PgR024_g047_t01 tca|Tcan_06377.1
453	2	1	1	1	asu|AgB01_g791_t02 asu|AgR122X_g001_t01 cel|CE_C35C5.6 pun|PgR054_g028_t08 tca|Tcan_08340.1
454	2	1	1	1	asu|AgB02_g234_t04 asu|AgR004_g377_t02 cel|CE_F45E12.2a pun|PgR007_g021_t01 tca|Tcan_06252.1
455	2	1	1	1	asu|AgB03_g130_t01 asu|AgR021X_g102_t02 tca|Tcan_14703.1 cel|CE_C06E8.5 pun|PgR019_g110_t01
456	2	1	1	1	asu|AgB03_g155_t01 asu|AgR032_g001_t01 pun|PgB06_g008_t01 cel|CE_C17E4.3 tca|Tcan_11767.1
457	2	1	1	1	asu|AgB03_g221_t01 asu|AgR004_g355_t01 pun|PgR022X_g015_t01 tca|Tcan_15775.1 cel|CE_C09G5.8a
458	2	1	1	1	asu|AgB04_g169_t01 asu|AgR125_g003_t01 cel|CE_T03F1.11 pun|PgR004_g108_t01 tca|Tcan_15554.1
459	2	1	1	1	asu|AgB05_g311_t01 asu|AgR106_g003_t01 cel|CE_K05B2.2a pun|PgB07_g044_t01 tca|Tcan_03308.1
460	2	1	1	1	asu|AgB05_g358_t01 asu|AgR008_g210_t01 cel|CE_F38B7.1a pun|PgR122_g005_t01 tca|Tcan_03279.1
461	2	1	1	1	asu|AgB05_g424_t01 asu|AgR077_g001_t01 cel|CE_W02B12.11 pun|PgR268_g002_t02 tca|Tcan_14126.1
462	2	1	1	1	asu|AgB06_g014_t01 asu|AgB06_g015_t01 cel|CE_Y51F10.4a pun|PgB03_g159_t01 tca|Tcan_16575.1
463	2	1	1	1	asu|AgB07_g316_t01 asu|AgR022_g165_t01 pun|PgR003_g217_t04 tca|Tcan_03450.1 cel|CE_C28D4.2a
464	2	1	1	1	asu|AgB09X_g027_t01 asu|AgR018X_g235_t01 pun|PgR023_g093_t01 cel|CE_T16H5.1a tca|Tcan_11150.1
465	2	1	1	1	asu|AgB11_g060_t01 asu|AgR015_g106_t01 cel|CE_F57B9.1 pun|PgR042_g070_t01 tca|Tcan_04842.1
466	2	1	1	1	asu|AgB11_g164_t01 asu|AgR016_g181_t01 cel|CE_JC8.4 tca|Tcan_07397.1 pun|PgR091_g008_t01
467	2	1	1	1	asu|AgB13X_g016_t03 asu|AgR002_g307_t02 pun|PgB06_g118_t03 tca|Tcan_03670.1 cel|CE_M03A1.1a
468	2	1	1	1	asu|AgB19_g084_t01 asu|AgR015_g186_t01 cel|CE_T05H4.6a pun|PgB05_g027_t03 tca|Tcan_08543.1
469	2	1	1	1	asu|AgB19_g088_t01 asu|AgR015_g184_t01 cel|CE_T10H9.4 pun|PgB05_g031_t01 tca|Tcan_08544.1
470	2	1	1	1	asu|AgB19_g091_t01 asu|AgR015_g182_t01 cel|CE_W03F9.1a pun|PgB05_g033_t05 tca|Tcan_08537.1
471	2	1	1	1	asu|AgB24_g027_t01 asu|AgR005_g237_t02 cel|CE_T20H4.4 pun|PgR099_g032_t02 tca|Tcan_04299.1
472	2	1	1	1	asu|AgB32_g003_t04 asu|AgR025_g058_t01 pun|PgR018_g111_t01 cel|CE_T04D1.3a tca|Tcan_18378.1
473	2	1	1	1	asu|AgE03_g020_t01 asu|AgE15_g011_t01 cel|CE_Y76A2A.1 pun|PgE126_g001_t05 tca|Tcan_03873.1
474	2	1	1	1	asu|AgE06_g004_t02 asu|AgR006_g009_t01 cel|CE_F29B9.4a pun|PgR085_g035_t02 tca|Tcan_04366.1
475	2	1	1	1	asu|AgE09_g010_t01 asu|AgR035X_g009_t01 cel|CE_DY3.7 pun|PgB24X_g025_t02 tca|Tcan_12020.1
476	2	1	1	1	asu|AgE16_g004_t02 asu|AgR029_g119_t02 cel|CE_Y74C10AR.1a pun|PgR027_g090_t02 tca|Tcan_09748.1
477	2	1	1	1	asu|AgR001_g187_t01 asu|AgR001_g188_t01 pun|PgR034_g099_t01 tca|Tcan_04789.1 cel|CE_C47D12.3a
478	2	1	1	1	asu|AgR003_g122_t01 asu|AgR061_g037_t02 pun|PgR108X_g027_t02 tca|Tcan_08063.1 cel|CE_F32A5.1a
479	2	1	1	1	asu|AgR005_g325_t02 asu|AgR024_g123_t05 pun|PgR007_g134_t03 tca|Tcan_15053.1 cel|CE_M7.7
480	2	1	1	1	asu|AgR005_g362_t01 asu|AgR005_g363_t02 cel|CE_F42A9.2 pun|PgR007_g170_t01 tca|Tcan_08049.1
481	2	1	1	1	asu|AgR006_g222_t01 asu|AgR015_g207_t01 cel|CE_Y80D3A.7a tca|Tcan_09994.1 pun|PgR040_g046_t01
482	2	1	1	1	asu|AgR007_g074_t03 asu|AgR076X_g006_t01 cel|CE_T27F2.1 pun|PgR026_g029_t02 tca|Tcan_16963.1
483	2	1	1	1	asu|AgR008_g126_t07 asu|AgR024_g105_t01 pun|PgR002_g066_t01 cel|CE_F46H5.8 tca|Tcan_15086.1
484	2	1	1	1	asu|AgR008_g310_t01 asu|AgR008_g311_t01 cel|CE_W03F9.5 pun|PgR013_g049_t01 tca|Tcan_18868.1
485	2	1	1	1	asu|AgR010_g133_t03 asu|AgR079X_g004_t01 pun|PgR006_g183_t02 cel|CE_K08E3.6 tca|Tcan_04159.1
486	2	1	1	1	asu|AgR011_g050_t01 asu|AgR011_g051_t03 cel|CE_K08A8.2a pun|PgB09_g008_t01 tca|Tcan_15939.1
487	2	1	1	1	asu|AgR012_g059_t02 asu|AgR105_g005_t01 cel|CE_Y48A5A.2 tca|Tcan_02888.1 pun|PgR037_g073_t01
488	2	1	1	1	asu|AgR012_g092_t02 asu|AgR013X_g213_t02 cel|CE_C50B6.11 pun|PgR037_g041_t02 tca|Tcan_07635.1
489	2	1	1	1	asu|AgR014X_g195_t01 asu|AgR015_g170_t03 pun|PgR031_g004_t01 tca|Tcan_14127.1 cel|CE_ZK1248.10
490	2	1	1	1	asu|AgR016_g214_t01 asu|AgR068_g001_t02 cel|CE_C33F10.2 pun|PgR011_g137_t01 tca|Tcan_17410.1
491	2	1	1	1	asu|AgR019X_g077_t01 asu|AgR019X_g078_t01 cel|CE_F10F2.4 pun|PgB12X_g008_t01 tca|Tcan_13126.1
492	2	1	1	1	asu|AgR026_g003_t01 asu|AgR026_g005_t03 cel|CE_F09E10.7a pun|PgR008_g009_t01 tca|Tcan_17998.1
493	2	1	1	1	asu|AgR028_g070_t01 asu|AgR028_g083_t01 cel|CE_C39E9.14a pun|PgR053_g020_t02 tca|Tcan_09652.1
494	2	1	1	1	asu|AgR028_g071_t01 asu|AgR028_g084_t01 cel|CE_Y39B6A.25 pun|PgR053_g021_t02 tca|Tcan_09637.1
495	2	1	1	1	asu|AgR028_g075_t01 asu|AgR028_g090_t01 cel|CE_B0280.3 pun|PgR053_g027_t01 tca|Tcan_09189.1
496	2	1	1	1	asu|AgR028_g079_t01 asu|AgR028_g094_t01 cel|CE_Y41G9A.1 pun|PgR054_g039_t01 tca|Tcan_09208.1
497	2	1	1	1	asu|AgR028_g081_t01 asu|AgR028_g096_t01 cel|CE_Y37H9A.3 pun|PgR054_g042_t01 tca|Tcan_09202.1
498	2	1	1	1	asu|AgR031_g112_t02 asu|AgR031_g113_t01 pun|PgR176_g004_t01 tca|Tcan_05241.1 cel|CE_T23B5.1a
499	2	1	1	1	asu|AgR058_g032_t01 asu|AgR091_g007_t02 cel|CE_Y87G2A.18 pun|PgR004_g178_t01 tca|Tcan_09599.1
500	1	1	1	2	cel|CE_B0035.2 cel|CE_C47A4.1 asu|AgB08X_g281_t06 pun|PgR001X_g060_t01 tca|Tcan_16796.1
501	1	1	1	2	cel|CE_B0218.1a cel|CE_B0218.2 asu|AgR022_g096_t03 tca|Tcan_13260.1 pun|PgR003_g156_t01
502	1	1	1	2	cel|CE_B0365.1 cel|CE_D1005.1 asu|AgR002_g370_t02 pun|PgR060_g035_t02 tca|Tcan_18139.1
503	1	1	1	2	cel|CE_B0416.6 cel|CE_M01F1.1 asu|AgB07_g060_t01 pun|PgR105_g034_t04 tca|Tcan_09141.1
504	1	1	1	2	cel|CE_B0432.2 cel|CE_C49G7.11 asu|AgR002_g289_t01 pun|PgB06_g102_t01 tca|Tcan_04403.1
505	1	1	1	2	cel|CE_B0495.4 cel|CE_F58E1.6a asu|AgR001_g517_t01 pun|PgR093_g024_t03 tca|Tcan_14534.1
506	1	1	1	2	cel|CE_B0496.7 cel|CE_F20D12.5 asu|AgR012_g178_t01 pun|PgR016_g029_t01 tca|Tcan_06641.1
507	1	1	1	2	cel|CE_BE0003N10.3a cel|CE_K04A8.6a asu|AgB02_g356_t06 pun|PgR033_g023_t01 tca|Tcan_06589.1
508	1	1	1	2	cel|CE_C01B4.6 cel|CE_Y19D10A.16 asu|AgR004_g104_t03 pun|PgR116_g018_t01 tca|Tcan_17147.1
509	1	1	1	2	cel|CE_C01H6.4 cel|CE_C46H11.2 asu|AgR032_g056_t03 pun|PgB15_g009_t01 tca|Tcan_11291.1
510	1	1	1	2	cel|CE_C02D5.1 cel|CE_C37A2.3 asu|AgR016_g019_t02 pun|PgR019_g064_t01 tca|Tcan_09336.1
511	1	1	1	2	cel|CE_C02F5.10 cel|CE_C02F5.2 asu|AgR005_g062_t02 pun|PgR010_g118_t02 tca|Tcan_12147.1
512	1	1	1	2	cel|CE_C03D6.5 cel|CE_F10G7.3 asu|AgR022_g225_t01 pun|PgB03_g023_t08 tca|Tcan_05362.1
513	1	1	1	2	cel|CE_C04F6.4a cel|CE_K08F9.2 asu|AgR023_g078_t02 pun|PgR132X_g012_t01 tca|Tcan_12844.1
514	1	1	1	2	cel|CE_C05B5.4 cel|CE_R10E12.2 asu|AgR017_g097_t02 pun|PgR008_g215_t01 tca|Tcan_09279.1
515	1	1	1	2	cel|CE_C05D2.3 cel|CE_C05D2.4a asu|AgR029_g082_t02 pun|PgR027_g134_t01 tca|Tcan_06090.1
516	1	1	1	2	cel|CE_C05G5.4 cel|CE_F23H11.3 asu|AgR017_g028_t03 pun|PgR011_g031_t01 tca|Tcan_15441.1
517	1	1	1	2	cel|CE_C06A12.4a cel|CE_R01E6.1a asu|AgR002_g153_t01 pun|PgR021_g065_t01 tca|Tcan_09466.1
518	1	1	1	2	cel|CE_C06A8.3 cel|CE_ZK970.7 asu|AgR006_g147_t01 pun|PgR020_g116_t01 tca|Tcan_09233.1
519	1	1	1	2	cel|CE_C06E7.88 cel|CE_C35A5.11a asu|AgR001_g292_t01 pun|PgR041_g082_t02 tca|Tcan_14261.1
520	1	1	1	2	cel|CE_C06G8.3b cel|CE_F30B5.7 asu|AgR019X_g177_t02 pun|PgR022X_g139_t04 tca|Tcan_03418.1
521	1	1	1	2	cel|CE_C08A9.1 cel|CE_F10D11.1 asu|AgB04_g240_t05 pun|PgR004_g164_t02 tca|Tcan_08495.1
522	1	1	1	2	cel|CE_C08E8.2 cel|CE_F57C2.5a asu|AgB17_g061_t03 pun|PgB05_g142_t01 tca|Tcan_03987.1
523	1	1	1	2	cel|CE_C10E2.6 cel|CE_T02G5.12 asu|AgR011_g056_t01 pun|PgB09_g005_t01 tca|Tcan_02567.1
524	1	1	1	2	cel|CE_C11E4.1 cel|CE_C11E4.2 asu|AgR027X_g122_t01 pun|PgR108X_g021_t01 tca|Tcan_08085.1
525	1	1	1	2	cel|CE_C11H1.2 cel|CE_Y75B8A.16 asu|AgR008_g134_t12 pun|PgR002_g058_t01 tca|Tcan_11836.1
526	1	1	1	2	cel|CE_C12D8.10a cel|CE_F28H6.1a asu|AgR059_g004_t04 pun|PgR024_g018_t03 tca|Tcan_13770.1
527	1	1	1	2	cel|CE_C14B9.3 cel|CE_F36H9.5 asu|AgB02_g505_t02 pun|PgB21_g023_t01 tca|Tcan_10297.1
528	1	1	1	2	cel|CE_C15F1.7a cel|CE_ZK430.3 asu|AgB08X_g037_t03 pun|PgR009X_g104_t02 tca|Tcan_05396.1
529	1	1	1	2	cel|CE_C15H11.1 cel|CE_F52F12.8 asu|AgR028_g015_t01 pun|PgR092_g006_t01 tca|Tcan_09179.1
530	1	1	1	2	cel|CE_C15H11.3a cel|CE_C15H11.6 asu|AgB21_g007_t01 pun|PgB10_g102_t01 tca|Tcan_16931.1
531	1	1	1	2	cel|CE_C17E4.9a cel|CE_F55F3.3a asu|AgR045_g070_t01 pun|PgR008_g062_t01 tca|Tcan_08686.1
532	1	1	1	2	cel|CE_C17F4.7 cel|CE_Y51F10.7 asu|AgR017_g056_t01 pun|PgR194_g003_t02 tca|Tcan_03146.1
533	1	1	1	2	cel|CE_C18E3.2 cel|CE_ZK1128.5 asu|AgB21_g020_t03 pun|PgR029_g085_t04 tca|Tcan_13786.1
534	1	1	1	2	cel|CE_C18E3.5 cel|CE_F08G12.2 asu|AgR034_g042_t01 pun|PgR076_g005_t05 tca|Tcan_10414.1
535	1	1	1	2	cel|CE_C23H4.6a cel|CE_F54D5.14 asu|AgR017_g148_t06 pun|PgR008_g179_t02 tca|Tcan_18979.1
536	1	1	1	2	cel|CE_C23H5.7 cel|CE_Y76B12C.1a asu|AgR022_g039_t02 pun|PgR003_g113_t01 tca|Tcan_05596.1
537	1	1	1	2	cel|CE_C24A3.4 cel|CE_ZK892.4 asu|AgR012_g268_t01 pun|PgR016_g104_t04 tca|Tcan_06633.1
538	1	1	1	2	cel|CE_C24H11.1 cel|CE_C24H11.2 asu|AgR026_g069_t06 pun|PgR068_g020_t01 tca|Tcan_17535.1
539	1	1	1	2	cel|CE_C25H3.14 cel|CE_C25H3.3 asu|AgR015_g148_t01 pun|PgR187_g006_t02 tca|Tcan_09876.1
540	1	1	1	2	cel|CE_C26D10.5a cel|CE_C26D10.7 asu|AgB12_g106_t03 pun|PgR027_g013_t01 tca|Tcan_12382.1
541	1	1	1	2	cel|CE_C27A7.1a cel|CE_C27A7.3a asu|AgR010_g121_t02 pun|PgR006_g172_t02 tca|Tcan_04141.1
542	1	1	1	2	cel|CE_C27C12.2 cel|CE_Y55F3AM.7a asu|AgB13X_g084_t03 pun|PgR086X_g007_t03 tca|Tcan_17353.1
543	1	1	1	2	cel|CE_C29F3.1 cel|CE_T08B2.7a asu|AgR007_g194_t01 pun|PgR138_g001_t03 tca|Tcan_11459.1
544	1	1	1	2	cel|CE_C30A5.4 cel|CE_R13A5.11a asu|AgB01_g642_t04 pun|PgR010_g010_t01 tca|Tcan_05737.1
545	1	1	1	2	cel|CE_C32E8.8 cel|CE_F55F8.1 asu|AgR035X_g078_t03 pun|PgR005X_g146_t01 tca|Tcan_05801.1
546	1	1	1	2	cel|CE_C32F10.5 cel|CE_T20B12.8 asu|AgR004_g010_t01 pun|PgB29_g010_t12 tca|Tcan_17715.1
547	1	1	1	2	cel|CE_C33D12.1 cel|CE_C33D12.7 asu|AgB01_g470_t01 pun|PgR015_g141_t01 tca|Tcan_10358.1
548	1	1	1	2	cel|CE_C35A11.4 cel|CE_K08F9.1a asu|AgR048X_g018_t02 pun|PgB07_g002_t02 tca|Tcan_14149.1
549	1	1	1	2	cel|CE_C36B1.10 cel|CE_Y106G6E.1 asu|AgR011_g081_t04 pun|PgR077_g026_t02 tca|Tcan_11823.1
550	1	1	1	2	cel|CE_C36B7.6 cel|CE_R166.2 asu|AgR014X_g130_t03 pun|PgB02X_g079_t01 tca|Tcan_05581.1
551	1	1	1	2	cel|CE_C36E6.3 cel|CE_C36E6.5 asu|AgR003_g088_t01 pun|PgR001X_g017_t01 tca|Tcan_16542.1
552	1	1	1	2	cel|CE_C37E2.2a cel|CE_C37E2.3 asu|AgR026_g068_t05 pun|PgR068_g019_t01 tca|Tcan_17556.1
553	1	1	1	2	cel|CE_C39H7.1 cel|CE_Y38H8A.3 asu|AgR020_g192_t01 pun|PgB17_g028_t02 tca|Tcan_03195.1
554	1	1	1	2	cel|CE_C42D4.3 cel|CE_F35B3.4 asu|AgB05_g378_t01 pun|PgB07_g068_t01 tca|Tcan_06163.1
555	1	1	1	2	cel|CE_C44B7.8 cel|CE_C44B7.9 asu|AgR006_g339_t02 pun|PgR004_g024_t01 tca|Tcan_08561.1
556	1	1	1	2	cel|CE_C47A10.5a cel|CE_F18E3.7a asu|AgR019X_g083_t01 pun|PgR038X_g079_t01 tca|Tcan_13127.1
557	1	1	1	2	cel|CE_C50E3.16 cel|CE_F37B4.7 asu|AgB15X_g130_t08 pun|PgR003_g071_t02 tca|Tcan_03122.1
558	1	1	1	2	cel|CE_C50F7.10 cel|CE_E02H9.5 asu|AgR007_g015_t01 pun|PgR026_g082_t01 tca|Tcan_08472.1
559	1	1	1	2	cel|CE_C53B4.7a cel|CE_F56H6.5 asu|AgB06_g185_t04 pun|PgR045_g006_t02 tca|Tcan_08860.1
560	1	1	1	2	cel|CE_C53B7.4 cel|CE_K07A12.3 asu|AgR014X_g042_t01 pun|PgB02X_g159_t01 tca|Tcan_09081.1
561	1	1	1	2	cel|CE_C54F6.13a cel|CE_ZK822.3a asu|AgB04_g159_t01 pun|PgR004_g100_t03 tca|Tcan_02762.1
562	1	1	1	2	cel|CE_C54F6.14 cel|CE_D1037.3 asu|AgR019X_g073_t02 pun|PgB12X_g012_t01 tca|Tcan_08829.1
563	1	1	1	2	cel|CE_C55A6.1 cel|CE_Y105E8A.14 asu|AgB06_g030_t01 pun|PgR053_g033_t02 tca|Tcan_14599.1
564	1	1	1	2	cel|CE_D1025.2 cel|CE_F52A8.5 asu|AgR066_g014_t03 pun|PgR062_g041_t04 tca|Tcan_11455.1
565	1	1	1	2	cel|CE_D2005.1 cel|CE_H15N14.1c asu|AgR004_g295_t08 pun|PgR080_g023_t02 tca|Tcan_18748.1
566	1	1	1	2	cel|CE_D2045.2 cel|CE_H04D03.3 asu|AgB18_g081_t04 pun|PgR044_g027_t11 tca|Tcan_08350.1
567	1	1	1	2	cel|CE_D2045.6 cel|CE_K08E7.7a asu|AgR003_g418_t01 pun|PgR012_g097_t03 tca|Tcan_17300.1
568	1	1	1	2	cel|CE_D2096.6 cel|CE_T25E4.1 asu|AgR006_g066_t01 pun|PgR121_g009_t01 tca|Tcan_10149.1
569	1	1	1	2	cel|CE_F01D5.7a cel|CE_F01D5.8a asu|AgR046_g082_t02 pun|PgB13_g028_t01 tca|Tcan_09105.1
570	1	1	1	2	cel|CE_F02C9.3 cel|CE_F36H2.1a asu|AgB04_g215_t01 pun|PgR004_g145_t02 tca|Tcan_17509.1
571	1	1	1	2	cel|CE_F02E8.1 cel|CE_F35G12.10 asu|AgR008_g073_t01 pun|PgR002_g117_t01 tca|Tcan_12074.1
572	1	1	1	2	cel|CE_F02E8.5 cel|CE_K06A1.5 asu|AgR008_g168_t06 pun|PgR002_g026_t04 tca|Tcan_06939.1
573	1	1	1	2	cel|CE_F07A11.2a cel|CE_F22B3.4 asu|AgR002_g340_t03 pun|PgR189_g003_t02 tca|Tcan_07913.1
574	1	1	1	2	cel|CE_F07A5.3 cel|CE_R07B1.3 asu|AgR011_g327_t02 pun|PgR005X_g024_t01 tca|Tcan_15480.1
575	1	1	1	2	cel|CE_F07B10.1a cel|CE_ZC190.1 asu|AgR019X_g144_t11 pun|PgR084X_g033_t07 tca|Tcan_09731.1
576	1	1	1	2	cel|CE_F09E10.3 cel|CE_Y39A1A.11a asu|AgR001_g527_t02 pun|PgR060_g018_t01 tca|Tcan_13658.1
577	1	1	1	2	cel|CE_F11C1.1 cel|CE_F42H10.2 asu|AgB10_g090_t03 pun|PgR240_g002_t01 tca|Tcan_18538.1
578	1	1	1	2	cel|CE_F17E5.2 cel|CE_F55A11.4a asu|AgR070_g014_t03 pun|PgR143_g008_t01 tca|Tcan_13988.1
579	1	1	1	2	cel|CE_F19H6.4 cel|CE_F42F12.3 asu|AgR004_g140_t01 pun|PgR081_g019_t07 tca|Tcan_02706.1
580	1	1	1	2	cel|CE_F20B6.2 cel|CE_Y110A7A.12 asu|AgR027X_g058_t03 pun|PgR074X_g012_t01 tca|Tcan_02976.1
581	1	1	1	2	cel|CE_F20C5.1a cel|CE_H23L24.5 asu|AgR010_g258_t01 pun|PgR124_g011_t01 tca|Tcan_05672.1
582	1	1	1	2	cel|CE_F20D1.4 cel|CE_F45E4.2 asu|AgR038_g022_t03 pun|PgR028_g097_t01 tca|Tcan_16140.1
583	1	1	1	2	cel|CE_F20D6.8 cel|CE_W04C9.5 asu|AgR009X_g130_t01 pun|PgR001X_g128_t01 tca|Tcan_12758.1
584	1	1	1	2	cel|CE_F21A10.2a cel|CE_F59B10.1 asu|AgR018X_g059_t04 pun|PgR032X_g059_t03 tca|Tcan_02681.1
585	1	1	1	2	cel|CE_F22B8.6a cel|CE_ZK1127.10 asu|AgR009X_g106_t03 pun|PgB14X_g011_t03 tca|Tcan_15264.1
586	1	1	1	2	cel|CE_F22D3.4 cel|CE_T22B11.1 asu|AgR010_g018_t01 pun|PgR006_g077_t03 tca|Tcan_14242.1
587	1	1	1	2	cel|CE_F26H9.8 cel|CE_F48E3.3 asu|AgR002_g489_t04 pun|PgB01_g060_t01 tca|Tcan_09112.1
588	1	1	1	2	cel|CE_F27C8.1 cel|CE_F52H2.2a asu|AgR014X_g007_t02 pun|PgB02X_g188_t02 tca|Tcan_12812.1
589	1	1	1	2	cel|CE_F27E11.1a cel|CE_F27E11.2 asu|AgB12_g073_t01 pun|PgR027_g043_t01 tca|Tcan_03914.1
590	1	1	1	2	cel|CE_F28F8.2 cel|CE_F46E10.1a asu|AgR020_g132_t02 pun|PgR006_g210_t01 tca|Tcan_04650.1
591	1	1	1	2	cel|CE_F28H1.4a cel|CE_F47B3.3 asu|AgR018X_g140_t02 pun|PgR023_g115_t01 tca|Tcan_08854.1
592	1	1	1	2	cel|CE_F28H6.3 cel|CE_R03A10.4a asu|AgR011_g123_t02 pun|PgR071_g034_t01 tca|Tcan_11714.1
593	1	1	1	2	cel|CE_F29B9.2a cel|CE_F43G6.6 asu|AgR009X_g184_t05 pun|PgR001X_g175_t03 tca|Tcan_14366.1
594	1	1	1	2	cel|CE_F31D4.8 cel|CE_W02D9.10 asu|AgR059_g024_t05 pun|PgR024_g039_t02 tca|Tcan_13389.1
595	1	1	1	2	cel|CE_F32B4.6 cel|CE_R05D7.4 asu|AgB08X_g022_t02 pun|PgR009X_g118_t01 tca|Tcan_14947.1
596	1	1	1	2	cel|CE_F35C11.3 cel|CE_M05D6.1 asu|AgR017_g201_t03 pun|PgR047_g067_t01 tca|Tcan_18062.1
597	1	1	1	2	cel|CE_F38E11.7a cel|CE_W03D2.5a asu|AgR012_g258_t02 pun|PgR016_g094_t01 tca|Tcan_07009.1
598	1	1	1	2	cel|CE_F40F4.4a cel|CE_ZK742.5 asu|AgB01_g607_t03 pun|PgR015_g037_t01 tca|Tcan_10641.1
599	1	1	1	2	cel|CE_F40F9.6a cel|CE_F52D1.1 asu|AgB02_g330_t03 pun|PgR060_g055_t05 tca|Tcan_12614.1
600	1	1	1	2	cel|CE_F46G10.3 cel|CE_F46G10.7a asu|AgR055_g051_t02 pun|PgB01_g134_t02 tca|Tcan_05867.1
601	1	1	1	2	cel|CE_F47D12.7 cel|CE_T16H12.6 asu|AgB03_g449_t01 pun|PgR010_g105_t01 tca|Tcan_12129.1
602	1	1	1	2	cel|CE_F48E3.7 cel|CE_R13A5.4 asu|AgB01_g071_t01 pun|PgR002_g235_t01 tca|Tcan_11256.1
603	1	1	1	2	cel|CE_F49E2.1a cel|CE_F49H6.5a asu|AgB13X_g062_t04 pun|PgR050X_g032_t03 tca|Tcan_17362.1
604	1	1	1	2	cel|CE_F52B5.6 cel|CE_F55D10.2 asu|AgR002_g499_t01 pun|PgB01_g068_t01 tca|Tcan_15573.1
605	1	1	1	2	cel|CE_F52F12.3 cel|CE_Y105C5A.24 asu|AgR019X_g085_t02 pun|PgR038X_g082_t03 tca|Tcan_13089.1
606	1	1	1	2	cel|CE_F53B2.1 cel|CE_R11A8.2 asu|AgR038_g023_t06 pun|PgR028_g096_t02 tca|Tcan_16136.1
607	1	1	1	2	cel|CE_F53G12.3 cel|CE_F56C11.1 asu|AgR031_g048_t02 pun|PgR048_g008_t02 tca|Tcan_10520.1
608	1	1	1	2	cel|CE_F54A3.4 cel|CE_ZC373.1a asu|AgB22X_g026_t01 pun|PgR050X_g053_t01 tca|Tcan_16604.1
609	1	1	1	2	cel|CE_F54C9.1 cel|CE_T05G5.10a asu|AgR023_g109_t01 pun|PgR009X_g243_t01 tca|Tcan_11206.1
610	1	1	1	2	cel|CE_F54D8.3a cel|CE_K04F1.15 asu|AgR002_g113_t02 pun|PgR011_g174_t01 tca|Tcan_03783.1
611	1	1	1	2	cel|CE_F54E12.2 cel|CE_T23H2.3 asu|AgR020_g173_t05 pun|PgB17_g011_t04 tca|Tcan_02199.1
612	1	1	1	2	cel|CE_F56D2.2 cel|CE_F56D2.5 asu|AgR042X_g077_t05 pun|PgB06_g124_t05 tca|Tcan_07135.1
613	1	1	1	2	cel|CE_F56F11.4a cel|CE_Y49E10.1 asu|AgR025_g077_t02 pun|PgR069_g032_t03 tca|Tcan_16226.1
614	1	1	1	2	cel|CE_F58A4.4a cel|CE_T24C4.5 asu|AgR044_g061_t02 pun|PgR044_g004_t01 tca|Tcan_04544.1
615	1	1	1	2	cel|CE_F59A6.5 cel|CE_W02B8.2 asu|AgB06_g122_t05 pun|PgB03_g079_t08 tca|Tcan_16109.1
616	1	1	1	2	cel|CE_F59B10.3 cel|CE_Y102A11A.7 asu|AgB15X_g110_t01 pun|PgB02X_g032_t04 tca|Tcan_15908.1
617	1	1	1	2	cel|CE_F59D6.7a cel|CE_ZK856.8 asu|AgR037_g093_t02 pun|PgR089_g022_t01 tca|Tcan_16694.1
618	1	1	1	2	cel|CE_F59E12.4a cel|CE_F59E12.5a asu|AgR002_g022_t01 pun|PgB08_g074_t01 tca|Tcan_11675.1
619	1	1	1	2	cel|CE_H11E01.2 cel|CE_Y15E3A.4 asu|AgR004_g361_t04 pun|PgR022X_g020_t01 tca|Tcan_17171.1
620	1	1	1	2	cel|CE_K01G5.2a cel|CE_K08H2.6 asu|AgR065_g014_t05 pun|PgR042_g091_t05 tca|Tcan_03813.1
621	1	1	1	2	cel|CE_K05F1.9 cel|CE_ZK354.7 asu|AgR004_g096_t01 pun|PgR125_g019_t01 tca|Tcan_12358.1
622	1	1	1	2	cel|CE_K09A9.3 cel|CE_ZK809.4a asu|AgB22X_g032_t01 pun|PgR050X_g059_t01 tca|Tcan_05700.1
623	1	1	1	2	cel|CE_K10C2.1 cel|CE_Y16B4A.2 asu|AgB05_g028_t06 pun|PgR067_g052_t01 tca|Tcan_12880.1
624	1	1	1	2	cel|CE_K10G9.1 cel|CE_T07A5.3 asu|AgR031_g017_t03 pun|PgR048_g033_t02 tca|Tcan_11797.1
625	1	1	1	2	cel|CE_K11D12.5 cel|CE_R10D12.9 asu|AgR041_g033_t02 pun|PgR212X_g001_t03 tca|Tcan_07174.1
626	1	1	1	2	cel|CE_M110.7 cel|CE_ZK370.4a asu|AgR044_g009_t11 pun|PgR019_g048_t03 tca|Tcan_11629.1
627	1	1	1	2	cel|CE_M162.5 cel|CE_R10D12.1 asu|AgR018X_g263_t01 pun|PgR062_g020_t01 tca|Tcan_04027.1
628	1	1	1	2	cel|CE_R02E12.2a cel|CE_Y53C12A.4 asu|AgR026_g057_t01 pun|PgR068_g007_t01 tca|Tcan_17541.1
629	1	1	1	2	cel|CE_R05A10.1a cel|CE_Y45F10D.6 asu|AgR017_g023_t02 pun|PgR011_g034_t01 tca|Tcan_15446.1
630	1	1	1	2	cel|CE_R06C7.7a cel|CE_Y48G1A.6a asu|AgB01_g274_t01 pun|PgB04_g158_t01 tca|Tcan_11434.1
631	1	1	1	2	cel|CE_R08A2.2 cel|CE_R08C7.8 asu|AgB14_g089_t03 pun|PgR363_g002_t01 tca|Tcan_16720.1
632	1	1	1	2	cel|CE_R10E11.2 cel|CE_Y38F2AL.4 asu|AgB02_g132_t04 pun|PgR113_g031_t01 tca|Tcan_02985.1
633	1	1	1	2	cel|CE_R186.1 cel|CE_Y80D3A.9 asu|AgR004_g018_t02 pun|PgR089_g047_t01 tca|Tcan_18612.1
634	1	1	1	2	cel|CE_T03G11.4 cel|CE_ZC410.3a asu|AgB01_g771_t02 pun|PgR010_g065_t03 tca|Tcan_13583.1
635	1	1	1	2	cel|CE_T05C12.1 cel|CE_W06F12.3 asu|AgB33_g007_t02 pun|PgB25_g018_t01 tca|Tcan_15632.1
636	1	1	1	2	cel|CE_T05H4.13a cel|CE_T08B1.3 asu|AgB20_g034_t01 pun|PgR049_g057_t01 tca|Tcan_16763.1
637	1	1	1	2	cel|CE_T07A9.1a cel|CE_T21D12.3 asu|AgR009X_g125_t02 pun|PgR001X_g122_t01 tca|Tcan_12761.1
638	1	1	1	2	cel|CE_T07A9.3 cel|CE_ZC416.4 asu|AgR036X_g080_t01 pun|PgR001X_g210_t01 tca|Tcan_07563.1
639	1	1	1	2	cel|CE_T07C4.2 cel|CE_T07C4.6 asu|AgB11_g059_t01 pun|PgR042_g069_t01 tca|Tcan_04845.1
640	1	1	1	2	cel|CE_T08D2.7 cel|CE_Y60A3A.12 asu|AgR003_g427_t04 pun|PgR012_g087_t02 tca|Tcan_07731.1
641	1	1	1	2	cel|CE_T10B10.2 cel|CE_T24C4.1 asu|AgR027X_g016_t03 pun|PgR103X_g018_t01 tca|Tcan_08442.1
642	1	1	1	2	cel|CE_T11A5.6a cel|CE_W05G11.4 asu|AgB02_g420_t04 pun|PgR033_g076_t01 tca|Tcan_10684.1
643	1	1	1	2	cel|CE_T20B3.2 cel|CE_ZK721.2 asu|AgR040X_g013_t01 pun|PgR103X_g011_t01 tca|Tcan_08387.1
644	1	1	1	2	cel|CE_T22B3.2a cel|CE_ZK757.3a asu|AgR004_g026_t02 pun|PgR197_g002_t03 tca|Tcan_10892.1
645	1	1	1	2	cel|CE_T25G12.13 cel|CE_T25G12.7 asu|AgB01_g203_t01 tca|Tcan_10789.1 pun|PgB04_g100_t05
646	1	1	1	2	cel|CE_T25G3.4 cel|CE_Y50E8A.6 asu|AgB04_g163_t06 pun|PgR004_g104_t03 tca|Tcan_15538.1
647	1	1	1	2	cel|CE_W03G9.4 cel|CE_Y45G5AM.2a asu|AgB04_g183_t05 pun|PgR004_g114_t02 tca|Tcan_06334.1
648	1	1	1	2	cel|CE_W07A12.6 cel|CE_W07A12.7 asu|AgR002_g300_t02 pun|PgB06_g113_t01 tca|Tcan_12221.1
649	1	1	1	2	cel|CE_Y37E11AR.3a cel|CE_Y37E11AR.4 asu|AgR059_g002_t01 pun|PgR024_g015_t01 tca|Tcan_13765.1
650	1	1	1	2	cel|CE_Y38C1AA.3a cel|CE_Y57G11C.47 asu|AgR048X_g032_t03 pun|PgR001X_g099_t01 tca|Tcan_08237.1
651	1	1	1	2	cel|CE_Y38C1AB.4 cel|CE_Y38C1AB.8a asu|AgR012_g086_t02 pun|PgR037_g045_t05 tca|Tcan_02878.1
652	1	1	1	2	cel|CE_Y39A3A.4 cel|CE_Y48G9A.9a asu|AgR032_g120_t01 pun|PgR019_g112_t01 tca|Tcan_14702.1
653	1	1	1	2	cel|CE_Y48B6A.7 cel|CE_Y48B6A.8 asu|AgR002_g072_t01 pun|PgB08_g039_t01 tca|Tcan_06486.1
654	1	1	1	2	cel|CE_Y49E10.3a cel|CE_Y75B8A.30 asu|AgB11_g116_t01 pun|PgR134_g010_t01 tca|Tcan_03933.1
655	1	1	1	2	cel|CE_Y54G11A.4 cel|CE_Y54G11A.7 asu|AgB12_g060_t01 pun|PgR027_g056_t01 tca|Tcan_12734.1
656	1	1	1	2	cel|CE_Y56A3A.12a cel|CE_Y56A3A.5 asu|AgR021X_g158_t03 pun|PgB23_g032_t01 tca|Tcan_04598.1
657	1	1	1	2	cel|CE_Y59A8B.25 cel|CE_Y59A8B.8 asu|AgR010_g178_t01 pun|PgR026_g109_t03 tca|Tcan_10755.1
658	1	1	1	2	cel|CE_ZC449.6 cel|CE_ZC8.1 asu|AgR002_g094_t01 pun|PgR011_g183_t02 tca|Tcan_06498.1
659	1	1	1	2	cel|CE_ZK1127.6 cel|CE_ZK1127.9a asu|AgB03_g127_t10 pun|PgB06_g031_t08 tca|Tcan_14841.1
660	1	1	1	2	cel|CE_ZK418.6 cel|CE_ZK418.7 asu|AgR009X_g201_t02 pun|PgR035X_g040_t02 tca|Tcan_03112.1
661	1	2	1	1	pun|PgB05_g134_t01 pun|PgB05_g138_t01 asu|AgB17_g055_t01 cel|CE_T27F2.2a tca|Tcan_03969.1
662	1	2	1	1	pun|PgB06_g004_t01 pun|PgR097_g003_t01 asu|AgB06_g166_t03 cel|CE_Y55D9A.1a tca|Tcan_08905.1
663	1	2	1	1	pun|PgB07_g024_t02 pun|PgR003_g193_t01 asu|AgB05_g335_t01 cel|CE_T11F9.4a tca|Tcan_03312.1
664	1	2	1	1	pun|PgB09_g010_t01 pun|PgR012_g092_t01 asu|AgR003_g422_t02 cel|CE_Y71H2AM.8 tca|Tcan_04879.1
665	1	2	1	1	pun|PgB09_g034_t01 pun|PgR032X_g034_t01 asu|AgR002_g141_t01 tca|Tcan_09517.1 cel|CE_F08F8.2
666	1	2	1	1	pun|PgB37_g003_t01 pun|PgE110_g001_t01 asu|AgR016_g135_t02 cel|CE_T21B10.7 tca|Tcan_16209.1
667	1	2	1	1	pun|PgE136_g001_t01 pun|PgR023_g112_t04 asu|AgE16_g005_t01 cel|CE_F27D4.5 tca|Tcan_08846.1
668	1	2	1	1	pun|PgR001X_g124_t01 pun|PgR001X_g125_t01 asu|AgR009X_g128_t01 cel|CE_C54A12.1 tca|Tcan_12760.1
669	1	2	1	1	pun|PgR001X_g180_t01 pun|PgR033_g096_t01 asu|AgR009X_g192_t01 cel|CE_C07D8.6 tca|Tcan_14353.1
670	1	2	1	1	pun|PgR001X_g181_t01 pun|PgR033_g097_t01 asu|AgR009X_g193_t01 cel|CE_T19D7.3 tca|Tcan_14362.1
671	1	2	1	1	pun|PgR001X_g182_t01 pun|PgR033_g098_t01 asu|AgR009X_g194_t04 cel|CE_F41D9.3a tca|Tcan_14339.1
672	1	2	1	1	pun|PgR001X_g183_t01 pun|PgR033_g099_t01 asu|AgR029_g053_t02 cel|CE_C36B1.7 tca|Tcan_11991.1
673	1	2	1	1	pun|PgR001X_g185_t01 pun|PgR033_g101_t01 asu|AgR072X_g008_t03 cel|CE_ZK829.6 tca|Tcan_09350.1
674	1	2	1	1	pun|PgR001X_g186_t01 pun|PgR033_g102_t01 asu|AgR072X_g011_t01 cel|CE_T20D3.7a tca|Tcan_09345.1
675	1	2	1	1	pun|PgR001X_g188_t01 pun|PgR033_g104_t01 asu|AgR072X_g013_t05 cel|CE_W03F8.3a tca|Tcan_09347.1
676	1	2	1	1	pun|PgR001X_g191_t01 pun|PgR033_g107_t01 asu|AgR036X_g096_t02 cel|CE_T10B10.3 tca|Tcan_09361.1
677	1	2	1	1	pun|PgR001X_g193_t01 pun|PgR033_g109_t01 asu|AgR036X_g097_t01 cel|CE_T04C10.2a tca|Tcan_09354.1
678	1	2	1	1	pun|PgR001X_g194_t01 pun|PgR033_g110_t01 asu|AgR036X_g099_t02 cel|CE_F20D1.9 tca|Tcan_09358.1
679	1	2	1	1	pun|PgR001X_g195_t01 pun|PgR033_g111_t01 asu|AgR014X_g237_t10 cel|CE_C18B12.6 tca|Tcan_09348.1
680	1	2	1	1	pun|PgR001X_g197_t01 pun|PgR033_g113_t01 asu|AgR014X_g238_t01 cel|CE_F01D4.4 tca|Tcan_09356.1
681	1	2	1	1	pun|PgR003_g129_t01 pun|PgR234X_g001_t01 asu|AgR022_g068_t05 cel|CE_F11A10.7 tca|Tcan_03762.1
682	1	2	1	1	pun|PgR007_g005_t01 pun|PgR013_g040_t01 asu|AgB02_g208_t04 cel|CE_Y37A1C.1a tca|Tcan_05292.1
683	1	2	1	1	pun|PgR007_g091_t01 pun|PgR028_g033_t01 asu|AgR007_g247_t01 cel|CE_ZK809.7 tca|Tcan_16744.1
684	1	2	1	1	pun|PgR007_g103_t01 pun|PgR007_g180_t04 asu|AgR005_g380_t03 cel|CE_Y53G8AR.9 tca|Tcan_08050.1
685	1	2	1	1	pun|PgR007_g212_t01 pun|PgR089_g038_t01 asu|AgR005_g424_t02 cel|CE_C23G10.2a tca|Tcan_17206.1
686	1	2	1	1	pun|PgR009X_g195_t01 pun|PgR009X_g198_t01 asu|AgB08X_g188_t01 cel|CE_H20J04.8 tca|Tcan_17921.1
687	1	2	1	1	pun|PgR010_g210_t01 pun|PgR010_g211_t01 asu|AgR005_g168_t01 cel|CE_F39D8.4 tca|Tcan_13057.1
688	1	2	1	1	pun|PgR011_g004_t04 pun|PgR090_g001_t04 asu|AgB10_g120_t03 cel|CE_F27D9.7 tca|Tcan_04262.1
689	1	2	1	1	pun|PgR012_g101_t02 pun|PgR169_g011_t01 asu|AgR003_g414_t03 cel|CE_Y50D7A.1 tca|Tcan_17304.1
690	1	2	1	1	pun|PgR012_g103_t01 pun|PgR012_g121_t01 asu|AgR003_g382_t01 cel|CE_C16A3.4 tca|Tcan_18102.1
691	1	2	1	1	pun|PgR012_g104_t01 pun|PgR169_g010_t01 asu|AgR003_g412_t05 cel|CE_Y54F10BM.1 tca|Tcan_18862.1
692	1	2	1	1	pun|PgR016_g065_t01 pun|PgR068_g056_t01 asu|AgR012_g223_t01 cel|CE_ZK792.5 tca|Tcan_14887.1
693	1	2	1	1	pun|PgR020_g113_t02 pun|PgR020_g114_t02 asu|AgR006_g142_t10 cel|CE_F52H3.1 tca|Tcan_09220.1
694	1	2	1	1	pun|PgR020_g152_t01 pun|PgR055_g001_t01 asu|AgB03_g332_t01 cel|CE_Y38F2AL.3a tca|Tcan_02892.1
695	1	2	1	1	pun|PgR026_g063_t06 pun|PgR315_g001_t03 tca|Tcan_05490.1 asu|AgR007_g032_t01 cel|CE_F32D8.12a
696	1	2	1	1	pun|PgR028_g086_t01 pun|PgR185X_g002_t03 asu|AgR038_g039_t05 cel|CE_ZK550.3 tca|Tcan_16129.1
697	1	2	1	1	pun|PgR030_g001_t01 pun|PgR166_g016_t01 asu|AgR003_g221_t01 cel|CE_ZC21.2a tca|Tcan_18088.1
698	1	2	1	1	pun|PgR033_g002_t02 pun|PgR060_g040_t08 asu|AgB02_g339_t05 cel|CE_F17C11.10 tca|Tcan_12616.1
699	1	2	1	1	pun|PgR036_g093_t05 pun|PgR108X_g022_t02 asu|AgB06_g260_t05 cel|CE_C10F3.6 tca|Tcan_05350.1
700	1	2	1	1	pun|PgR041_g073_t01 pun|PgR041_g074_t02 asu|AgR001_g286_t03 cel|CE_Y55B1AL.2 tca|Tcan_02599.1
701	1	2	1	1	pun|PgR042_g054_t01 pun|PgR042_g056_t01 asu|AgB11_g047_t01 tca|Tcan_16236.1 cel|CE_M01E10.2a
702	1	2	1	1	pun|PgR046_g011_t01 pun|PgR071_g058_t01 asu|AgR031_g099_t01 tca|Tcan_03560.1 cel|CE_Y6B3B.5a
703	1	2	1	1	pun|PgR046_g059_t02 pun|PgR046_g063_t01 asu|AgB03_g021_t03 cel|CE_R12A1.4 tca|Tcan_15365.1
704	1	2	1	1	pun|PgR054_g055_t01 pun|PgR060_g039_t04 asu|AgB01_g349_t04 cel|CE_Y76A2A.2a tca|Tcan_10491.1
705	1	2	1	1	pun|PgR066_g008_t02 pun|PgR264_g002_t01 asu|AgR057_g038_t01 cel|CE_H14N18.3 tca|Tcan_08617.1
706	1	2	1	1	pun|PgR071_g053_t01 pun|PgR235_g004_t01 asu|AgR031_g105_t03 cel|CE_F43G9.9 tca|Tcan_13341.1
707	1	2	1	1	pun|PgR074X_g050_t01 pun|PgR108X_g001_t01 asu|AgR027X_g099_t01 cel|CE_F40B5.2a tca|Tcan_14153.1
708	1	2	1	1	pun|PgR075_g070_t01 pun|PgR242_g001_t01 asu|AgR052_g030_t05 cel|CE_C48E7.2 tca|Tcan_10713.1
709	1	2	1	1	pun|PgR078_g027_t01 pun|PgR078_g028_t03 asu|AgB03_g366_t05 tca|Tcan_07122.1 cel|CE_F18A1.5
710	1	2	1	1	pun|PgR079_g001_t01 pun|PgR192_g001_t01 asu|AgB06_g349_t01 cel|CE_C53A5.1 tca|Tcan_18994.1
711	1	2	1	1	pun|PgR080_g055_t01 pun|PgR268_g001_t01 asu|AgR004_g321_t01 cel|CE_R07E5.4 tca|Tcan_09778.1
712	1	2	1	1	pun|PgR098_g030_t01 pun|PgR098_g031_t01 asu|AgR013X_g068_t04 cel|CE_T12F5.4 tca|Tcan_05038.1
713	1	2	1	1	pun|PgR115X_g005_t01 pun|PgR115X_g006_t02 asu|AgR009X_g335_t06 cel|CE_R07G3.5 tca|Tcan_13540.1
714	1	2	1	1	pun|PgR123_g004_t01 pun|PgR123_g005_t01 asu|AgB11_g099_t12 tca|Tcan_10462.1 cel|CE_T20G5.9
715	1	2	1	1	pun|PgR231_g001_t01 pun|PgR245X_g004_t02 asu|AgR001_g403_t01 cel|CE_T24H10.3 tca|Tcan_10046.1
716	1	2	1	1	pun|PgR337X_g001_t01 pun|PgR337X_g002_t01 cel|CE_C30F12.7 asu|AgB04_g021_t06 tca|Tcan_15548.1
717	1	2	1	1	pun|PgR422_g001_t01 pun|PgR422_g002_t01 asu|AgR005_g174_t02 cel|CE_R07E5.14 tca|Tcan_13035.1
718	1	1	2	1	tca|Tcan_02832.1 tca|Tcan_02861.1 asu|AgR012_g074_t01 pun|PgR037_g061_t02 cel|CE_Y67A10A.9
719	1	1	2	1	tca|Tcan_03250.1 tca|Tcan_03271.1 asu|AgR008_g207_t01 pun|PgR122_g003_t04 cel|CE_T08H10.1
720	1	1	2	1	tca|Tcan_03383.1 tca|Tcan_16992.1 asu|AgB05_g021_t02 cel|CE_C16C10.6 pun|PgR015_g016_t02
721	1	1	2	1	tca|Tcan_03400.1 tca|Tcan_08182.1 asu|AgB06_g070_t03 cel|CE_C29E6.1a pun|PgB03_g128_t02
722	1	1	2	1	tca|Tcan_03438.1 tca|Tcan_03441.1 asu|AgB15X_g009_t02 cel|CE_W01A11.1a pun|PgR062_g026_t01
723	1	1	2	1	tca|Tcan_03541.1 tca|Tcan_09627.1 asu|AgR002_g256_t03 pun|PgR135_g007_t02 cel|CE_B0285.6
724	1	1	2	1	tca|Tcan_03874.1 tca|Tcan_15235.1 asu|AgB09X_g030_t01 cel|CE_H34C03.2a pun|PgB14X_g051_t02
725	1	1	2	1	tca|Tcan_04206.1 tca|Tcan_06721.1 asu|AgR006_g161_t03 cel|CE_C52E4.4 pun|PgR020_g129_t03
726	1	1	2	1	tca|Tcan_04381.1 tca|Tcan_14904.1 asu|AgB19_g040_t03 pun|PgB13_g020_t07 cel|CE_Y49G5B.1
727	1	1	2	1	tca|Tcan_04840.1 tca|Tcan_04866.1 cel|CE_C56A3.8a asu|AgR065_g012_t01 pun|PgR042_g089_t03
728	1	1	2	1	tca|Tcan_05047.1 tca|Tcan_11677.1 asu|AgR002_g024_t06 cel|CE_F44G4.4a pun|PgB08_g072_t02
729	1	1	2	1	tca|Tcan_05158.1 tca|Tcan_05174.1 asu|AgR026_g048_t07 cel|CE_C03C11.2 pun|PgR090_g030_t08
730	1	1	2	1	tca|Tcan_05257.1 tca|Tcan_05307.1 asu|AgB03_g201_t04 cel|CE_K09E4.2a pun|PgR022X_g046_t01
731	1	1	2	1	tca|Tcan_05487.1 tca|Tcan_05501.1 asu|AgR007_g030_t03 cel|CE_F32D8.14a pun|PgR026_g065_t01
732	1	1	2	1	tca|Tcan_05512.1 tca|Tcan_05513.1 asu|AgB06_g086_t05 cel|CE_C50F4.14a pun|PgB03_g107_t02
733	1	1	2	1	tca|Tcan_05537.1 tca|Tcan_06499.1 asu|AgR011_g246_t01 cel|CE_T05G5.3 pun|PgR011_g083_t01
734	1	1	2	1	tca|Tcan_05694.1 tca|Tcan_11524.1 asu|AgB02_g345_t04 pun|PgR033_g013_t01 cel|CE_C49H3.3
735	1	1	2	1	tca|Tcan_05696.1 tca|Tcan_05984.1 asu|AgB07_g179_t01 cel|CE_Y48C3A.7 pun|PgR043_g025_t01
736	1	1	2	1	tca|Tcan_05902.1 tca|Tcan_05913.1 asu|AgR003_g309_t01 cel|CE_C28H8.1 pun|PgR248_g002_t02
737	1	1	2	1	tca|Tcan_06067.1 tca|Tcan_07810.1 asu|AgB07_g089_t14 cel|CE_Y47G6A.8 pun|PgR044_g071_t01
738	1	1	2	1	tca|Tcan_06296.1 tca|Tcan_09171.1 asu|AgR018X_g228_t01 cel|CE_B0205.7 pun|PgR023_g088_t02
739	1	1	2	1	tca|Tcan_06401.1 tca|Tcan_06406.1 asu|AgR008_g023_t02 cel|CE_F53F4.10 pun|PgR002_g156_t01
740	1	1	2	1	tca|Tcan_06439.1 tca|Tcan_06452.1 asu|AgB02_g470_t13 cel|CE_F25B3.1 pun|PgR110_g012_t08
741	1	1	2	1	tca|Tcan_06599.1 tca|Tcan_18151.1 asu|AgB23_g003_t01 cel|CE_F32B6.2 pun|PgR106_g026_t01
742	1	1	2	1	tca|Tcan_06783.1 tca|Tcan_09158.1 asu|AgR056_g038_t01 cel|CE_F08C6.3 pun|PgR066_g037_t03
743	1	1	2	1	tca|Tcan_07024.1 tca|Tcan_07027.1 asu|AgR106_g002_t03 cel|CE_F26D10.9a pun|PgR016_g101_t02
744	1	1	2	1	tca|Tcan_07584.1 tca|Tcan_17562.1 asu|AgR001_g038_t04 cel|CE_Y57G11C.16 pun|PgR065_g056_t01
745	1	1	2	1	tca|Tcan_07595.1 tca|Tcan_07598.1 asu|AgR014X_g078_t03 cel|CE_Y41E3.1a pun|PgB02X_g127_t01
746	1	1	2	1	tca|Tcan_07697.1 tca|Tcan_07717.1 asu|AgB05_g099_t03 cel|CE_C56G2.15 pun|PgR223_g003_t02
747	1	1	2	1	tca|Tcan_08030.1 tca|Tcan_09472.1 asu|AgB14_g135_t01 cel|CE_T04F8.4 pun|PgR039_g069_t01
748	1	1	2	1	tca|Tcan_08185.1 tca|Tcan_18322.1 asu|AgB06_g073_t03 cel|CE_Y116A8C.10b pun|PgB03_g119_t05
749	1	1	2	1	tca|Tcan_08404.1 tca|Tcan_13354.1 asu|AgR040X_g043_t03 pun|PgR083X_g027_t05 cel|CE_ZC518.2
750	1	1	2	1	tca|Tcan_08659.1 tca|Tcan_13234.1 asu|AgR002_g082_t01 cel|CE_Y48B6A.12 pun|PgR011_g191_t01
751	1	1	2	1	tca|Tcan_08810.1 tca|Tcan_08835.1 asu|AgR019X_g136_t02 cel|CE_T27F6.7 pun|PgR084X_g040_t01
752	1	1	2	1	tca|Tcan_09316.1 tca|Tcan_09327.1 asu|AgR013X_g150_t01 cel|CE_Y48B6A.1 pun|PgR056X_g032_t01
753	1	1	2	1	tca|Tcan_10049.1 tca|Tcan_15956.1 asu|AgR016_g162_t10 cel|CE_F25B5.4a pun|PgB09_g075_t02
754	1	1	2	1	tca|Tcan_10376.1 tca|Tcan_18896.1 asu|AgB03_g087_t02 cel|CE_Y54G11A.9 pun|PgB06_g072_t01
755	1	1	2	1	tca|Tcan_10815.1 tca|Tcan_14727.1 asu|AgR001_g449_t05 cel|CE_F18G5.4 pun|PgR114_g013_t01
756	1	1	2	1	tca|Tcan_10857.1 tca|Tcan_16410.1 asu|AgR007_g237_t03 cel|CE_W02B12.12a pun|PgR028_g039_t04
757	1	1	2	1	tca|Tcan_11145.1 tca|Tcan_11147.1 asu|AgR011_g011_t03 cel|CE_Y54E10BR.2 pun|PgR027_g074_t02
758	1	1	2	1	tca|Tcan_11153.1 tca|Tcan_11174.1 asu|AgR018X_g249_t05 cel|CE_F28B3.4a pun|PgR023_g014_t01
759	1	1	2	1	tca|Tcan_11250.1 tca|Tcan_17875.1 asu|AgB23_g031_t01 pun|PgB16_g025_t01 cel|CE_C05C8.5
760	1	1	2	1	tca|Tcan_11533.1 tca|Tcan_11552.1 asu|AgR002_g056_t03 cel|CE_Y39B6A.6 pun|PgR011_g015_t01
761	1	1	2	1	tca|Tcan_11612.1 tca|Tcan_16587.1 asu|AgB06_g154_t02 pun|PgR207_g004_t01 cel|CE_ZK1320.9
762	1	1	2	1	tca|Tcan_11778.1 tca|Tcan_11793.1 asu|AgB01_g423_t05 cel|CE_F54E7.1a pun|PgR048_g053_t01
763	1	1	2	1	tca|Tcan_11980.1 tca|Tcan_11989.1 asu|AgR035X_g026_t01 cel|CE_Y48G8AL.7 pun|PgB24X_g006_t01
764	1	1	2	1	tca|Tcan_12232.1 tca|Tcan_17198.1 asu|AgR032_g022_t02 cel|CE_T25D3.3 pun|PgR094_g001_t01
765	1	1	2	1	tca|Tcan_12422.1 tca|Tcan_12434.1 asu|AgR003_g175_t01 cel|CE_C18D11.1 pun|PgR018_g018_t01
766	1	1	2	1	tca|Tcan_12701.1 tca|Tcan_12705.1 asu|AgB03_g467_t01 cel|CE_Y47D3A.23a pun|PgB21_g038_t05
767	1	1	2	1	tca|Tcan_12991.1 tca|Tcan_13351.1 asu|AgB09X_g076_t01 cel|CE_T09A5.11 pun|PgR014X_g071_t01
768	1	1	2	1	tca|Tcan_12998.1 tca|Tcan_13005.1 asu|AgB01_g189_t01 cel|CE_F27D9.8a pun|PgR031_g094_t01
769	1	1	2	1	tca|Tcan_13936.1 tca|Tcan_13951.1 asu|AgB05_g054_t02 cel|CE_B0336.10 pun|PgB04_g160_t01
770	1	1	2	1	tca|Tcan_14202.1 tca|Tcan_14237.1 asu|AgR010_g053_t06 cel|CE_T07F10.1a pun|PgR006_g111_t03
771	1	1	2	1	tca|Tcan_14435.1 tca|Tcan_16914.1 asu|AgR018X_g073_t04 cel|CE_T12G3.2a pun|PgR032X_g049_t02
772	1	1	2	1	tca|Tcan_14484.1 tca|Tcan_14491.1 asu|AgR018X_g179_t01 cel|CE_W01A8.4 pun|PgR023_g039_t01
773	1	1	2	1	tca|Tcan_14731.1 tca|Tcan_14734.1 asu|AgR001_g006_t09 cel|CE_F15H10.7 pun|PgR104_g005_t02
774	1	1	2	1	tca|Tcan_15154.1 tca|Tcan_15159.1 asu|AgB07_g010_t01 pun|PgB14X_g063_t01 cel|CE_C49A9.10
775	1	1	2	1	tca|Tcan_15544.1 tca|Tcan_15556.1 asu|AgB04_g026_t10 cel|CE_M05B5.4 pun|PgR094_g029_t02
776	1	1	2	1	tca|Tcan_16002.1 tca|Tcan_18347.1 asu|AgB08X_g138_t04 cel|CE_Y53F4B.21 pun|PgR009X_g151_t01
777	1	1	2	1	tca|Tcan_16334.1 tca|Tcan_16341.1 asu|AgB08X_g220_t01 cel|CE_D2030.1 pun|PgR009X_g230_t01
778	1	1	2	1	tca|Tcan_17268.1 tca|Tcan_17321.1 asu|AgR002_g018_t01 cel|CE_C34C6.4 pun|PgR050X_g031_t03
779	1	1	2	1	tca|Tcan_17693.1 tca|Tcan_17699.1 asu|AgB08X_g210_t01 cel|CE_Y48G8AL.15 pun|PgR009X_g220_t01
780	1	1	2	1	tca|Tcan_17697.1 tca|Tcan_17701.1 asu|AgB08X_g209_t02 cel|CE_Y48G8AR.1a pun|PgR009X_g219_t01
781	1	1	2	1	tca|Tcan_17723.1 tca|Tcan_17732.1 asu|AgB08X_g129_t01 cel|CE_F18A11.2 pun|PgR009X_g142_t01
782	1	1	2	1	tca|Tcan_18297.1 tca|Tcan_18308.1 asu|AgB01_g400_t02 cel|CE_Y102E9.2a pun|PgR048_g071_t01
783	1	1	2	1	tca|Tcan_18533.1 tca|Tcan_18545.1 asu|AgR056_g029_t01 pun|PgR066_g045_t01 cel|CE_H22K11.1
784	1	2	1	1	asu|AgB01_g026_t05 pun|PgR002_g276_t01 tca|Tcan_06844.1 cel|CE_C02B4.1 pun|PgR002_g278_t01
785	1	1	1	2	asu|AgB01_g087_t03 cel|CE_T25E12.5 pun|PgR002_g223_t03 tca|Tcan_18876.1 cel|CE_F56B6.4a
786	1	1	2	1	asu|AgB01_g096_t04 cel|CE_C16D6.2a pun|PgR002_g216_t01 tca|Tcan_11260.1 tca|Tcan_18880.1
787	1	2	1	1	asu|AgB01_g114_t01 cel|CE_F52E4.5 pun|PgR002_g198_t02 tca|Tcan_06738.1 pun|PgR002_g199_t03
788	2	1	1	1	asu|AgB01_g208_t01 cel|CE_C15H9.7 pun|PgB04_g104_t01 tca|Tcan_13672.1 asu|AgR031_g134_t02
789	2	1	1	1	asu|AgB01_g458_t01 pun|PgR031_g002_t04 tca|Tcan_16391.1 asu|AgR017_g001_t01 cel|CE_F43E2.7a
790	1	1	2	1	asu|AgB01_g490_t09 cel|CE_C31E10.8 pun|PgR015_g119_t02 tca|Tcan_06735.1 tca|Tcan_06739.1
791	1	2	1	1	asu|AgB01_g496_t01 cel|CE_R09A8.3 pun|PgR015_g115_t01 pun|PgR298_g003_t01 tca|Tcan_11061.1
792	1	2	1	1	asu|AgB01_g509_t02 cel|CE_F45B8.4 pun|PgR015_g106_t01 tca|Tcan_08661.1 pun|PgR015_g105_t01
793	1	2	1	1	asu|AgB01_g517_t04 cel|CE_F11C7.4 pun|PgR015_g097_t01 pun|PgR015_g098_t03 tca|Tcan_03606.1
794	1	1	2	1	asu|AgB01_g524_t04 cel|CE_F14H8.1a pun|PgR015_g091_t04 tca|Tcan_03609.1 tca|Tcan_03605.1
795	1	1	1	2	asu|AgB01_g538_t01 cel|CE_F55F3.1 tca|Tcan_04671.1 cel|CE_B0432.10 pun|PgR015_g079_t03
796	1	1	2	1	asu|AgB01_g643_t02 cel|CE_C55B6.1a pun|PgR010_g011_t01 tca|Tcan_05723.1 tca|Tcan_02513.1
797	2	1	1	1	asu|AgB01_g792_t02 pun|PgR070_g052_t06 asu|AgB14_g062_t01 tca|Tcan_18421.1 cel|CE_Y66D12A.13
798	2	1	1	1	asu|AgB02_g007_t01 pun|PgR005X_g188_t10 tca|Tcan_17385.1 asu|AgB02_g008_t01 cel|CE_T22H6.6a
799	2	1	1	1	asu|AgB02_g014_t01 cel|CE_F10F2.2 pun|PgR050X_g036_t01 tca|Tcan_13636.1 asu|AgB13X_g059_t02
800	2	1	1	1	asu|AgB02_g017_t01 pun|PgR050X_g037_t01 tca|Tcan_13649.1 asu|AgB22X_g007_t03 cel|CE_F13B12.3a
801	1	1	2	1	asu|AgB02_g084_t02 cel|CE_H28G03.6 pun|PgR017X_g006_t02 tca|Tcan_04646.1 tca|Tcan_07845.1
802	1	2	1	1	asu|AgB02_g112_t02 cel|CE_ZK1251.9a pun|PgR014X_g001_t01 pun|PgR017X_g029_t01 tca|Tcan_03997.1
803	1	1	2	1	asu|AgB02_g128_t03 cel|CE_F10D7.5a pun|PgR017X_g062_t02 tca|Tcan_02992.1 tca|Tcan_02984.1
804	1	1	2	1	asu|AgB02_g147_t01 cel|CE_C10C5.1a pun|PgR017X_g075_t01 tca|Tcan_02982.1 tca|Tcan_12549.1
805	1	1	2	1	asu|AgB02_g244_t06 cel|CE_ZK377.2a pun|PgR007_g029_t06 tca|Tcan_02556.1 tca|Tcan_05648.1
806	1	1	2	1	asu|AgB02_g311_t01 pun|PgR202_g003_t01 tca|Tcan_15526.1 cel|CE_D2023.2a tca|Tcan_15529.1
807	1	1	2	1	asu|AgB02_g321_t04 cel|CE_Y97E10AL.1 pun|PgR012_g009_t01 tca|Tcan_12617.1 tca|Tcan_16875.1
808	1	1	2	1	asu|AgB02_g359_t04 cel|CE_C01G10.11a pun|PgR033_g027_t01 tca|Tcan_15707.1 tca|Tcan_00102.1
809	1	1	1	2	asu|AgB02_g361_t03 cel|CE_W02B12.2 pun|PgR033_g029_t01 tca|Tcan_15709.1 cel|CE_W02B12.3a
810	1	1	2	1	asu|AgB02_g407_t04 cel|CE_C25E10.12 pun|PgR049_g031_t01 tca|Tcan_07246.1 tca|Tcan_04193.1
811	2	1	1	1	asu|AgB02_g418_t03 cel|CE_Y92H12A.4a pun|PgR033_g075_t05 tca|Tcan_10683.1 asu|AgB02_g419_t02
812	2	1	1	1	pun|PgR033_g091_t02 asu|AgB02_g438_t16 cel|CE_R31.1a tca|Tcan_07232.1 asu|AgR020_g002_t02
813	1	1	2	1	asu|AgB02_g454_t02 cel|CE_T10G3.5a pun|PgR110_g010_t01 tca|Tcan_11688.1 tca|Tcan_06395.1
814	2	1	1	1	asu|AgB03_g039_t01 pun|PgR028_g114_t02 asu|AgB03_g040_t03 cel|CE_Y45F10A.6a tca|Tcan_15504.1
815	2	1	1	1	asu|AgB03_g044_t02 pun|PgR028_g118_t06 tca|Tcan_05123.1 asu|AgB03_g045_t01 cel|CE_T09E8.1a
816	2	1	1	1	asu|AgB03_g063_t02 pun|PgR151_g007_t09 tca|Tcan_06384.1 asu|AgB03_g064_t03 cel|CE_ZC455.1a
817	1	1	2	1	asu|AgB03_g105_t01 cel|CE_M106.1 pun|PgB06_g054_t01 tca|Tcan_13205.1 tca|Tcan_13209.1
818	1	2	1	1	asu|AgB03_g165_t03 cel|CE_D2013.8a pun|PgR019_g039_t01 pun|PgR022X_g001_t01 tca|Tcan_05898.1
819	1	1	2	1	asu|AgB03_g261_t02 cel|CE_C30C11.4 pun|PgR118_g017_t08 tca|Tcan_13881.1 tca|Tcan_13883.1
820	1	1	2	1	asu|AgB03_g287_t01 cel|CE_F01G4.3 pun|PgR055_g037_t01 tca|Tcan_04104.1 tca|Tcan_06742.1
821	1	2	1	1	asu|AgB03_g339_t08 cel|CE_Y42H9B.2 pun|PgR037_g099_t01 pun|PgR090_g033_t02 tca|Tcan_02857.1
822	1	1	2	1	asu|AgB03_g347_t01 cel|CE_R74.1 pun|PgR078_g038_t07 tca|Tcan_05830.1 tca|Tcan_16869.1
823	1	1	2	1	asu|AgB03_g481_t01 cel|CE_B0412.2 pun|PgB26_g001_t02 tca|Tcan_18688.1 tca|Tcan_18710.1
824	1	2	1	1	asu|AgB03_g506_t04 cel|CE_F42H10.3a pun|PgR273X_g002_t02 tca|Tcan_17202.1 pun|PgR164X_g007_t02
825	1	1	2	1	asu|AgB04_g075_t05 cel|CE_H06O01.2 pun|PgR097_g020_t01 tca|Tcan_06547.1 tca|Tcan_17013.1
826	2	1	1	1	asu|AgB04_g094_t10 cel|CE_Y6B3A.1a pun|PgR004_g046_t02 tca|Tcan_02613.1 asu|AgB04_g095_t02
827	1	1	2	1	asu|AgB04_g118_t04 cel|CE_T04D3.3a pun|PgR004_g068_t03 tca|Tcan_07901.1 tca|Tcan_03559.1
828	1	1	2	1	asu|AgB04_g143_t03 cel|CE_F55A3.1 pun|PgR004_g086_t01 tca|Tcan_18957.1 tca|Tcan_18964.1
829	1	1	2	1	asu|AgB04_g145_t03 cel|CE_C43E11.8 pun|PgR004_g088_t02 tca|Tcan_12552.1 tca|Tcan_18967.1
830	1	1	2	1	asu|AgB04_g212_t02 cel|CE_T27C10.6 pun|PgR004_g141_t02 tca|Tcan_05220.1 tca|Tcan_05222.1
831	2	1	1	1	asu|AgB04_g265_t05 cel|CE_H38K22.1 tca|Tcan_09595.1 asu|AgB04_g267_t03 pun|PgR004_g188_t02
832	1	1	1	2	asu|AgB04_g298_t05 pun|PgR004_g213_t02 tca|Tcan_08946.1 cel|CE_Y105E8B.5 cel|CE_Y51F10.11
833	1	2	1	1	asu|AgB04_g347_t02 cel|CE_C31C9.1a pun|PgR088_g022_t01 tca|Tcan_09902.1 pun|PgR088_g018_t02
834	2	1	1	1	asu|AgB04_g393_t01 cel|CE_Y48G1A.5a pun|PgR087_g008_t01 tca|Tcan_14091.1 asu|AgB04_g394_t02
835	1	1	2	1	asu|AgB04_g404_t01 pun|PgR087_g014_t01 tca|Tcan_14789.1 cel|CE_ZK328.4 tca|Tcan_14794.1
836	1	1	2	1	asu|AgB05_g032_t01 cel|CE_Y60A3A.1 pun|PgR067_g047_t01 tca|Tcan_08733.1 tca|Tcan_12556.1
837	1	1	2	1	asu|AgB05_g034_t02 cel|CE_C48D5.2a pun|PgR067_g045_t01 tca|Tcan_11078.1 tca|Tcan_15819.1
838	2	1	1	1	asu|AgB05_g088_t05 cel|CE_F02A9.4a tca|Tcan_07754.1 asu|AgB05_g089_t01 pun|PgR171_g002_t02
839	1	1	2	1	asu|AgB05_g094_t02 cel|CE_Y75B8A.5 pun|PgR223_g001_t02 tca|Tcan_00419.1 tca|Tcan_07700.1
840	2	1	1	1	asu|AgB05_g111_t01 cel|CE_ZK512.3 tca|Tcan_07721.1 asu|AgB05_g112_t04 pun|PgR098_g017_t04
841	1	1	2	1	asu|AgB05_g119_t02 cel|CE_R05D3.4a pun|PgR098_g023_t04 tca|Tcan_07695.1 tca|Tcan_02467.1
842	2	1	1	1	asu|AgB05_g128_t01 tca|Tcan_13972.1 asu|AgB05_g130_t01 cel|CE_F26B1.3 pun|PgR012_g199_t01
843	1	1	2	1	asu|AgB05_g149_t01 cel|CE_Y54H5A.2 pun|PgR012_g189_t01 tca|Tcan_07728.1 tca|Tcan_07710.1
844	2	1	1	1	asu|AgB05_g173_t02 cel|CE_ZK783.4 pun|PgR012_g029_t04 tca|Tcan_06873.1 asu|AgB05_g174_t01
845	2	1	1	1	asu|AgB05_g187_t06 pun|PgR012_g044_t06 tca|Tcan_03805.1 asu|AgB05_g188_t01 cel|CE_F11H8.4a
846	2	1	1	1	asu|AgB05_g231_t04 pun|PgB01_g182_t01 asu|AgB05_g233_t02 cel|CE_C54G7.4 tca|Tcan_18818.1
847	1	1	2	1	asu|AgB05_g247_t17 cel|CE_T10A3.1a pun|PgB01_g195_t07 tca|Tcan_16820.1 tca|Tcan_16816.1
848	1	1	1	2	asu|AgB05_g261_t07 pun|PgB01_g178_t14 tca|Tcan_18202.1 cel|CE_F13B9.1a cel|CE_ZK512.5a
849	2	1	1	1	asu|AgB05_g284_t01 cel|CE_C01C7.1a pun|PgR037_g047_t02 tca|Tcan_02871.1 asu|AgR012_g085_t02
850	1	2	1	1	asu|AgB05_g294_t01 pun|PgB01_g150_t01 tca|Tcan_17387.1 cel|CE_F52D10.6 pun|PgB01_g151_t01
851	1	1	2	1	asu|AgB05_g316_t01 cel|CE_F41A4.1 pun|PgB07_g039_t01 tca|Tcan_13590.1 tca|Tcan_13597.1
852	2	1	1	1	asu|AgB05_g350_t02 cel|CE_T21H8.1a pun|PgB07_g051_t04 tca|Tcan_03329.1 asu|AgB05_g352_t05
853	1	1	2	1	asu|AgB05_g365_t07 cel|CE_F54E4.1a pun|PgB07_g058_t03 tca|Tcan_17246.1 tca|Tcan_16802.1
854	1	1	2	1	asu|AgB06_g202_t02 cel|CE_F07C6.4a pun|PgR045_g021_t11 tca|Tcan_08859.1 tca|Tcan_08880.1
855	1	2	1	1	asu|AgB06_g305_t02 cel|CE_C35A5.8 pun|PgR073_g046_t02 pun|PgR250_g003_t01 tca|Tcan_06379.1
856	2	1	1	1	asu|AgB06_g309_t01 pun|PgR079_g039_t04 asu|AgR238_g001_t01 cel|CE_F28C1.3a tca|Tcan_14976.1
857	1	1	2	1	asu|AgB06_g332_t03 cel|CE_F36D4.3a pun|PgR079_g016_t01 tca|Tcan_05111.1 tca|Tcan_02555.1
858	1	2	1	1	asu|AgB07_g068_t01 cel|CE_F21H12.6 pun|PgR105_g040_t01 pun|PgR233X_g001_t01 tca|Tcan_09152.1
859	1	2	1	1	asu|AgB07_g268_t04 cel|CE_C01B7.1a pun|PgR003_g039_t03 pun|PgR003_g053_t02 tca|Tcan_17893.1
860	1	2	1	1	asu|AgB07_g309_t01 cel|CE_C50F4.16 pun|PgR061_g052_t01 tca|Tcan_02251.1 pun|PgR061_g051_t04
861	2	1	1	1	asu|AgB08X_g006_t01 pun|PgR009X_g138_t02 tca|Tcan_17910.1 asu|AgE01_g020_t01 cel|CE_C30H6.7a
862	1	2	1	1	asu|AgB08X_g034_t05 cel|CE_R06F6.12 pun|PgR009X_g107_t01 tca|Tcan_05426.1 pun|PgR009X_g108_t01
863	2	1	1	1	asu|AgB08X_g262_t01 pun|PgR001X_g077_t01 asu|AgB08X_g263_t01 cel|CE_ZC449.2 tca|Tcan_14096.1
864	1	1	2	1	asu|AgB08X_g296_t02 cel|CE_F15A2.6a pun|PgR001X_g047_t01 tca|Tcan_16534.1 tca|Tcan_16523.1
865	2	1	1	1	asu|AgB09X_g015_t06 cel|CE_W01D2.5a asu|AgR082_g001_t01 pun|PgR020_g053_t02 tca|Tcan_16290.1
866	2	1	1	1	asu|AgB09X_g020_t01 pun|PgB03_g019_t01 tca|Tcan_05360.1 asu|AgR015_g066_t04 cel|CE_C44B7.3
867	2	1	1	1	asu|AgB09X_g033_t01 cel|CE_B0218.3 pun|PgB14X_g054_t01 asu|AgR051X_g046_t01 tca|Tcan_06562.1
868	2	1	1	1	asu|AgB09X_g058_t06 cel|CE_F14E5.2a pun|PgR014X_g055_t01 tca|Tcan_10178.1 asu|AgB09X_g059_t01
869	1	1	2	1	asu|AgB09X_g088_t02 cel|CE_F44G4.8a pun|PgR014X_g079_t02 tca|Tcan_12967.1 tca|Tcan_12977.1
870	1	2	1	1	asu|AgB09X_g120_t01 cel|CE_C23H3.9a pun|PgR014X_g110_t01 tca|Tcan_18007.1 pun|PgR014X_g109_t01
871	1	1	2	1	asu|AgB09X_g130_t01 cel|CE_Y76B12C.2 pun|PgR014X_g120_t01 tca|Tcan_17167.1 tca|Tcan_08679.1
872	1	1	2	1	asu|AgB10_g020_t01 cel|CE_C54D1.5 pun|PgB09_g065_t03 tca|Tcan_10043.1 tca|Tcan_10052.1
873	2	1	1	1	asu|AgB10_g041_t01 cel|CE_F14F4.3 tca|Tcan_09956.1 asu|AgB10_g043_t01 pun|PgB09_g049_t01
874	2	1	1	1	asu|AgB10_g074_t01 cel|CE_F40F11.4 asu|AgB15X_g123_t02 pun|PgR102_g003_t02 tca|Tcan_02930.1
875	1	1	2	1	asu|AgB10_g178_t05 cel|CE_W09D10.2 pun|PgR012_g071_t01 tca|Tcan_04856.1 tca|Tcan_04862.1
876	2	1	1	1	asu|AgB11_g006_t05 cel|CE_F55H2.6 pun|PgR042_g015_t03 tca|Tcan_03427.1 asu|AgB11_g007_t03
877	1	1	2	1	asu|AgB11_g008_t07 cel|CE_F34D10.6a pun|PgR042_g016_t04 tca|Tcan_03426.1 tca|Tcan_13333.1
878	1	1	2	1	asu|AgB11_g011_t01 cel|CE_C02E11.1a pun|PgR042_g020_t07 tca|Tcan_09635.1 tca|Tcan_02578.1
879	2	1	1	1	asu|AgB11_g033_t01 cel|CE_W09B6.2a pun|PgR085_g058_t03 tca|Tcan_11279.1 asu|AgR003_g002_t01
880	1	1	2	1	asu|AgB11_g036_t11 cel|CE_F53A3.3a pun|PgR042_g045_t04 tca|Tcan_10109.1 tca|Tcan_13627.1
881	1	1	2	1	asu|AgB11_g085_t05 cel|CE_B0336.3 pun|PgR123_g024_t06 tca|Tcan_10205.1 tca|Tcan_02247.1
882	2	1	1	1	asu|AgB11_g102_t02 cel|CE_E03A3.6a pun|PgR173_g002_t05 tca|Tcan_10452.1 asu|AgB11_g104_t03
883	2	1	1	1	asu|AgB11_g127_t01 pun|PgR134_g024_t02 tca|Tcan_07386.1 asu|AgB11_g128_t01 cel|CE_ZK328.1a
884	1	1	2	1	asu|AgB12_g012_t01 pun|PgB18_g037_t04 tca|Tcan_10998.1 cel|CE_H08M01.2b tca|Tcan_05103.1
885	2	1	1	1	asu|AgB12_g130_t01 pun|PgR191_g002_t03 tca|Tcan_11899.1 asu|AgB12_g131_t02 cel|CE_C18E9.10
886	2	1	1	1	asu|AgB13X_g018_t01 cel|CE_F10E7.8a pun|PgB06_g120_t02 tca|Tcan_10845.1 asu|AgR042X_g083_t06
887	1	1	2	1	asu|AgB13X_g034_t04 cel|CE_Y34B4A.4a pun|PgR100X_g002_t04 tca|Tcan_12527.1 tca|Tcan_12539.1
888	2	1	1	1	asu|AgB14_g069_t01 cel|CE_Y81G3A.3a pun|PgR008_g124_t02 tca|Tcan_08592.1 asu|AgB14_g071_t01
889	1	1	2	1	asu|AgB14_g076_t04 cel|CE_T12A2.2 pun|PgR008_g129_t01 tca|Tcan_17121.1 tca|Tcan_18315.1
890	1	1	2	1	asu|AgB14_g098_t04 cel|CE_T10H10.1 pun|PgR039_g092_t01 tca|Tcan_12507.1 tca|Tcan_12511.1
891	1	2	1	1	asu|AgB14_g099_t04 pun|PgR039_g091_t08 tca|Tcan_12503.1 cel|CE_F38B2.4a pun|PgR039_g087_t01
892	2	1	1	1	asu|AgB15X_g032_t03 cel|CE_C37C3.7 asu|AgB15X_g033_t01 pun|PgB02X_g063_t01 tca|Tcan_05588.1
893	1	1	2	1	tca|Tcan_17328.1 asu|AgR010_g143_t04 cel|CE_F25E2.3 pun|PgR006_g191_t02 tca|Tcan_04177.1
894	1	2	1	1	asu|AgB16X_g037_t03 cel|CE_C52B11.3 pun|PgR005X_g216_t01 tca|Tcan_07058.1 pun|PgR005X_g215_t01
895	2	1	1	1	asu|AgB16X_g072_t02 pun|PgR013_g147_t03 tca|Tcan_03021.1 asu|AgB16X_g073_t01 cel|CE_F58H1.1
896	2	1	1	1	asu|AgB17_g009_t02 cel|CE_F52C12.4a tca|Tcan_06693.1 asu|AgB17_g010_t01 pun|PgR041_g029_t03
897	1	1	2	1	asu|AgB18_g046_t05 cel|CE_W02D3.10a pun|PgR044_g057_t06 tca|Tcan_07797.1 tca|Tcan_02385.1
898	2	1	1	1	asu|AgB18_g054_t04 cel|CE_ZK370.3a asu|AgB18_g056_t02 pun|PgR044_g049_t04 tca|Tcan_07837.1
899	1	2	1	1	asu|AgB18_g061_t04 cel|CE_ZK520.3a pun|PgR044_g044_t01 pun|PgR044_g045_t01 tca|Tcan_07840.1
900	1	1	2	1	asu|AgB18_g076_t06 cel|CE_ZK632.1a pun|PgR044_g032_t04 tca|Tcan_07793.1 tca|Tcan_07811.1
901	2	1	1	1	asu|AgB18_g119_t03 pun|PgR058_g039_t02 asu|AgB18_g121_t01 cel|CE_C24A1.3a tca|Tcan_12954.1
902	2	1	1	1	asu|AgB19_g081_t01 cel|CE_C13F10.4 pun|PgB05_g024_t01 tca|Tcan_08510.1 asu|AgR030_g097_t01
903	2	1	1	1	asu|AgB19_g092_t01 pun|PgB05_g034_t01 asu|AgR015_g181_t01 cel|CE_Y66H1A.4 tca|Tcan_08549.1
904	2	1	1	1	asu|AgB20_g060_t02 pun|PgR049_g041_t02 asu|AgR224X_g001_t01 cel|CE_Y43F8B.2a tca|Tcan_17216.1
905	1	2	1	1	asu|AgB21_g043_t01 cel|CE_W01B6.9 pun|PgR043_g067_t01 tca|Tcan_06962.1 pun|PgR043_g066_t01
906	2	1	1	1	asu|AgB21_g061_t01 pun|PgR029_g026_t04 tca|Tcan_13698.1 asu|AgR001_g601_t01 cel|CE_F57B9.5
907	2	1	1	1	asu|AgB21_g088_t01 cel|CE_C27F2.8 pun|PgR029_g046_t01 tca|Tcan_04635.1 asu|AgR041_g053_t01
908	2	1	1	1	asu|AgB22X_g012_t06 pun|PgR042_g094_t01 tca|Tcan_04873.1 asu|AgR065_g017_t02 cel|CE_F37A4.7a
909	2	1	1	1	asu|AgB22X_g016_t01 cel|CE_M03A8.2 pun|PgR050X_g043_t02 tca|Tcan_13650.1 asu|AgB22X_g017_t02
910	1	1	2	1	asu|AgB23_g010_t01 cel|CE_Y43C5A.6a pun|PgR151_g012_t03 tca|Tcan_06360.1 tca|Tcan_06351.1
911	1	2	1	1	asu|AgB24_g024_t01 cel|CE_F55F8.3 pun|PgR099_g034_t01 pun|PgR099_g037_t01 tca|Tcan_04295.1
912	2	1	1	1	asu|AgB25_g007_t02 cel|CE_C42C1.4a pun|PgR019_g130_t01 tca|Tcan_14710.1 asu|AgB25_g008_t05
913	2	1	1	1	asu|AgB28X_g011_t05 cel|CE_T24H10.1 asu|AgR035X_g060_t01 pun|PgR005X_g155_t01 tca|Tcan_12015.1
914	2	1	1	1	asu|AgE01_g021_t03 cel|CE_K08D10.4 asu|AgR051X_g031_t03 pun|PgB14X_g037_t01 tca|Tcan_06141.1
915	1	2	1	1	asu|AgE15_g007_t03 pun|PgE195_g002_t01 tca|Tcan_10610.1 cel|CE_F56D1.7 pun|PgE407_g001_t02
916	2	1	1	1	asu|AgE21_g002_t03 cel|CE_F37E3.1 pun|PgR126X_g003_t02 tca|Tcan_11985.1 asu|AgR035X_g034_t01
917	2	1	1	1	asu|AgE25_g003_t04 pun|PgB36X_g004_t03 asu|AgR027X_g017_t01 cel|CE_K02A4.1 tca|Tcan_08407.1
918	1	2	1	1	asu|AgE49_g004_t03 cel|CE_B0348.6a pun|PgB39_g005_t05 tca|Tcan_03964.1 pun|PgB05_g149_t01
919	2	1	1	1	asu|AgR001_g083_t03 cel|CE_C33B4.3a pun|PgR065_g013_t09 tca|Tcan_12683.1 asu|AgR001_g086_t01
920	1	1	2	1	asu|AgR001_g087_t01 cel|CE_F48A11.1a pun|PgR065_g014_t02 tca|Tcan_11920.1 tca|Tcan_11911.1
921	1	1	2	1	asu|AgR001_g100_t11 cel|CE_C25G4.2 pun|PgR034_g013_t02 tca|Tcan_03281.1 tca|Tcan_09380.1
922	2	1	1	1	asu|AgR001_g143_t01 pun|PgR034_g050_t04 asu|AgR001_g144_t01 cel|CE_D2013.9 tca|Tcan_05469.1
923	1	1	2	1	asu|AgR001_g159_t01 cel|CE_F41G3.12 pun|PgR034_g062_t03 tca|Tcan_10147.1 tca|Tcan_14325.1
924	2	1	1	1	asu|AgR001_g228_t01 cel|CE_T08A11.2 pun|PgR070_g036_t02 tca|Tcan_15692.1 asu|AgR001_g229_t03
925	1	1	2	1	asu|AgR001_g244_t05 cel|CE_R02D3.1a pun|PgR041_g037_t01 tca|Tcan_18354.1 tca|Tcan_18345.1
926	1	1	2	1	asu|AgR001_g246_t02 cel|CE_Y41D4B.19a pun|PgR041_g038_t01 tca|Tcan_18355.1 tca|Tcan_03697.1
927	1	2	1	1	asu|AgR001_g396_t02 cel|CE_H23L24.3a pun|PgR047_g005_t01 tca|Tcan_10435.1 pun|PgR047_g006_t01
928	1	2	1	1	asu|AgR001_g414_t01 cel|CE_F23H11.2 pun|PgR093_g015_t01 pun|PgR261_g001_t01 tca|Tcan_02774.1
929	1	1	2	1	asu|AgR001_g435_t01 cel|CE_T24C12.2 pun|PgR060_g007_t02 tca|Tcan_10782.1 tca|Tcan_10814.1
930	1	1	2	1	asu|AgR001_g499_t01 pun|PgR093_g035_t01 cel|CE_C56E6.4a tca|Tcan_09403.1 tca|Tcan_09401.1
931	2	1	1	1	asu|AgR001_g537_t01 pun|PgR041_g015_t01 tca|Tcan_16043.1 asu|AgR010_g217_t02 cel|CE_Y55F3BR.6
932	1	1	2	1	asu|AgR001_g587_t03 cel|CE_T12D8.1 pun|PgR069_g045_t09 tca|Tcan_09250.1 tca|Tcan_09257.1
933	2	1	1	1	asu|AgR002_g026_t01 cel|CE_F46C5.6 asu|AgR002_g028_t01 pun|PgB08_g071_t02 tca|Tcan_11680.1
934	1	1	2	1	asu|AgR002_g161_t09 pun|PgR021_g059_t02 tca|Tcan_11822.1 cel|CE_C33G3.1a tca|Tcan_13199.1
935	2	1	1	1	asu|AgR002_g170_t01 cel|CE_Y52B11A.2a tca|Tcan_12721.1 asu|AgR002_g171_t01 pun|PgR021_g052_t03
936	2	1	1	1	asu|AgR002_g228_t03 pun|PgR024_g058_t01 tca|Tcan_14989.1 asu|AgR030_g011_t02 cel|CE_F54F3.1a
937	1	2	1	1	asu|AgR002_g246_t05 cel|CE_K07B1.4a pun|PgB05_g002_t04 tca|Tcan_03546.1 pun|PgR135_g001_t01
938	1	1	1	2	asu|AgR002_g257_t05 cel|CE_ZC15.5 pun|PgR135_g008_t01 tca|Tcan_03543.1 cel|CE_ZC15.10
939	1	2	1	1	asu|AgR002_g383_t06 cel|CE_F46F6.2a pun|PgR059_g073_t01 pun|PgR277_g001_t01 tca|Tcan_16828.1
940	1	1	2	1	asu|AgR002_g391_t01 cel|CE_C41A3.1a pun|PgB10_g023_t01 tca|Tcan_16822.1 tca|Tcan_16824.1
941	1	1	2	1	asu|AgR002_g441_t02 pun|PgB01_g016_t01 tca|Tcan_06809.1 cel|CE_F46F6.4a tca|Tcan_05865.1
942	1	1	2	1	asu|AgR002_g448_t02 pun|PgB01_g026_t02 tca|Tcan_02497.1 cel|CE_T21D9.1 tca|Tcan_04162.1
943	2	1	1	1	asu|AgR003_g010_t01 tca|Tcan_07543.1 asu|AgR003_g011_t01 pun|PgB08_g005_t02 cel|CE_F07C3.1
944	1	1	2	1	asu|AgR003_g012_t05 cel|CE_F55B12.4 pun|PgB08_g004_t02 tca|Tcan_00898.1 tca|Tcan_05336.1
945	1	1	2	1	asu|AgR003_g024_t01 cel|CE_Y22D7AR.5 pun|PgR355X_g002_t01 tca|Tcan_06556.1 tca|Tcan_03614.1
946	1	2	1	1	asu|AgR003_g037_t04 cel|CE_E02H1.7 pun|PgB20_g035_t01 tca|Tcan_07474.1 pun|PgB20_g034_t02
947	1	2	1	1	asu|AgR003_g101_t09 cel|CE_F31B12.1a pun|PgR001X_g007_t02 pun|PgR211_g001_t03 tca|Tcan_16550.1
948	1	1	2	1	asu|AgR003_g174_t01 cel|CE_M01F1.7 pun|PgR018_g017_t01 tca|Tcan_15414.1 tca|Tcan_03931.1
949	2	1	1	1	asu|AgR003_g239_t01 cel|CE_C28H8.3 pun|PgR030_g016_t07 tca|Tcan_04896.1 asu|AgR003_g240_t01
950	1	2	1	1	asu|AgR003_g280_t10 cel|CE_F57B9.2a pun|PgR030_g058_t03 pun|PgR030_g060_t03 tca|Tcan_15337.1
951	1	1	2	1	asu|AgR003_g292_t01 cel|CE_H19M22.2a pun|PgR030_g068_t11 tca|Tcan_15324.1 tca|Tcan_15334.1
952	1	2	1	1	asu|AgR003_g306_t02 cel|CE_F25B5.5 pun|PgR030_g087_t01 pun|PgR248_g006_t01 tca|Tcan_05215.1
953	2	1	1	1	asu|AgR003_g370_t01 cel|CE_ZK328.5a pun|PgR012_g135_t02 asu|AgR003_g371_t01 tca|Tcan_14822.1
954	1	1	1	2	asu|AgR003_g417_t01 cel|CE_D2045.7 pun|PgR012_g098_t02 tca|Tcan_17302.1 cel|CE_D2045.9
955	2	1	1	1	asu|AgR003_g419_t06 pun|PgR012_g094_t01 asu|AgR026_g162_t01 cel|CE_ZK328.7a tca|Tcan_17303.1
956	1	2	1	1	asu|AgR004_g042_t04 cel|CE_F25D1.4 pun|PgR025_g014_t02 tca|Tcan_03141.1 pun|PgE138_g002_t01
957	2	1	1	1	asu|AgR004_g089_t03 pun|PgR125_g014_t01 tca|Tcan_12351.1 asu|AgR004_g090_t01 cel|CE_T10H9.2
958	2	1	1	1	asu|AgR004_g142_t06 pun|PgR081_g018_t02 asu|AgR012_g138_t01 cel|CE_T19F4.1a tca|Tcan_02708.1
959	2	1	1	1	asu|AgR004_g232_t01 cel|CE_B0336.9a asu|AgR004_g233_t02 pun|PgR058_g015_t03 tca|Tcan_12586.1
960	2	1	1	1	asu|AgR005_g171_t02 cel|CE_Y37D8A.3 pun|PgR010_g214_t01 asu|AgR005_g172_t02 tca|Tcan_13058.1
961	2	1	1	1	asu|AgR005_g191_t01 tca|Tcan_03940.1 asu|AgR005_g192_t04 pun|PgR025_g033_t02 cel|CE_Y39A1A.12
962	1	1	2	1	asu|AgR005_g229_t01 cel|CE_Y71D11A.5 tca|Tcan_07437.1 tca|Tcan_07445.1 pun|PgR025_g058_t01
963	2	1	1	1	asu|AgR005_g327_t01 pun|PgR007_g135_t01 tca|Tcan_15056.1 asu|AgR024_g124_t01 cel|CE_ZK783.1a
964	1	1	2	1	asu|AgR005_g340_t01 cel|CE_ZK632.6a pun|PgR007_g146_t01 tca|Tcan_02473.1 tca|Tcan_07096.1
965	1	1	2	1	asu|AgR005_g418_t03 cel|CE_Y111B2A.22a pun|PgR007_g204_t02 tca|Tcan_17097.1 tca|Tcan_17099.1
966	2	1	1	1	asu|AgR006_g081_t02 pun|PgR215_g003_t02 asu|AgR006_g082_t02 cel|CE_R155.1a tca|Tcan_18403.1
967	2	1	1	1	asu|AgR006_g084_t06 pun|PgR021_g110_t04 tca|Tcan_11940.1 asu|AgR032_g026_t02 cel|CE_R07G3.3a
968	1	1	1	2	asu|AgR006_g110_t02 cel|CE_W06A11.1 pun|PgR021_g088_t01 tca|Tcan_09228.1 cel|CE_R11F4.3
969	1	1	2	1	asu|AgR006_g111_t11 cel|CE_R06A4.8 pun|PgR021_g087_t03 tca|Tcan_11884.1 tca|Tcan_11907.1
970	1	1	2	1	asu|AgR006_g156_t01 cel|CE_F27E5.4 pun|PgR020_g124_t02 tca|Tcan_06554.1 tca|Tcan_07477.1
971	1	2	1	1	asu|AgR006_g166_t02 cel|CE_Y54E2A.1 pun|PgR020_g138_t01 tca|Tcan_07465.1 pun|PgR020_g139_t01
972	1	1	2	1	asu|AgR007_g059_t03 cel|CE_H24K24.4a pun|PgR026_g042_t05 tca|Tcan_15840.1 tca|Tcan_15849.1
973	1	1	2	1	asu|AgR007_g164_t05 cel|CE_T22A3.8 pun|PgR053_g029_t06 tca|Tcan_14082.1 tca|Tcan_14090.1
974	2	1	1	1	asu|AgR007_g199_t03 cel|CE_F18C12.2a pun|PgR201_g003_t02 tca|Tcan_11470.1 asu|AgR007_g200_t04
975	2	1	1	1	asu|AgR007_g210_t01 cel|CE_C30F12.5a asu|AgR007_g212_t02 pun|PgB25_g006_t03 tca|Tcan_11474.1
976	1	1	1	2	asu|AgR007_g276_t02 cel|CE_T19B4.4 pun|PgR028_g013_t01 tca|Tcan_07650.1 cel|CE_T12E12.6
977	2	1	1	1	asu|AgR007_g300_t05 pun|PgR045_g073_t01 tca|Tcan_09794.1 asu|AgR094_g001_t01 cel|CE_Y59H11AL.1a
978	1	1	2	1	asu|AgR008_g053_t05 cel|CE_F44B9.8 pun|PgR002_g125_t01 tca|Tcan_12083.1 tca|Tcan_02500.1
979	2	1	1	1	asu|AgR008_g128_t01 cel|CE_ZC504.4a pun|PgR002_g064_t03 tca|Tcan_10421.1 asu|AgR008_g130_t01
980	2	1	1	1	asu|AgR008_g158_t01 cel|CE_F08C6.1a pun|PgR002_g032_t01 tca|Tcan_06928.1 asu|AgR008_g159_t02
981	2	1	1	1	asu|AgR008_g203_t01 pun|PgR002_g002_t02 tca|Tcan_15346.1 asu|AgR085_g001_t01 cel|CE_T25B6.2
982	1	1	2	1	asu|AgR008_g227_t03 pun|PgB01_g079_t01 tca|Tcan_03051.1 cel|CE_C11H1.4a tca|Tcan_03053.1
983	1	1	2	1	asu|AgR008_g323_t01 cel|CE_F23B12.7 pun|PgR013_g056_t01 tca|Tcan_14678.1 tca|Tcan_14644.1
984	1	2	1	1	asu|AgR008_g345_t02 cel|CE_Y59A8A.1 pun|PgR022X_g056_t01 pun|PgR104_g043_t02 tca|Tcan_08197.1
985	1	1	2	1	asu|AgR009X_g012_t03 cel|CE_W10C6.1 pun|PgR063X_g030_t05 tca|Tcan_03674.1 tca|Tcan_03672.1
986	1	2	1	1	asu|AgR009X_g029_t03 cel|CE_F59G1.4a pun|PgR063X_g017_t04 tca|Tcan_17885.1 pun|PgR063X_g015_t01
987	2	1	1	1	asu|AgR009X_g095_t02 pun|PgB14X_g022_t01 tca|Tcan_15245.1 asu|AgR009X_g096_t05 cel|CE_ZK930.1a
988	1	1	2	1	asu|AgR009X_g214_t09 cel|CE_M02F4.8 pun|PgR035X_g050_t01 tca|Tcan_15983.1 tca|Tcan_17481.1
989	2	1	1	1	asu|AgR009X_g227_t06 tca|Tcan_15999.1 asu|AgR009X_g228_t01 cel|CE_F42A8.3 pun|PgR035X_g060_t02
990	1	1	1	2	asu|AgR009X_g260_t02 cel|CE_F16F9.5 pun|PgR035X_g085_t01 tca|Tcan_14359.1 cel|CE_T01C8.7
991	1	2	1	1	asu|AgR009X_g298_t01 cel|CE_Y41G9A.4a pun|PgR035X_g118_t01 tca|Tcan_13488.1 pun|PgR035X_g117_t01
992	1	1	2	1	asu|AgR009X_g359_t02 cel|CE_C09D8.1a pun|PgR014X_g005_t03 tca|Tcan_15486.1 tca|Tcan_17672.1
993	2	1	1	1	asu|AgR010_g038_t02 cel|CE_T02E9.1 asu|AgR010_g039_t01 pun|PgR006_g097_t03 tca|Tcan_18452.1
994	1	1	1	2	asu|AgR010_g091_t01 cel|CE_C47D2.2 pun|PgR006_g143_t01 tca|Tcan_09540.1 cel|CE_F49E8.4
995	1	1	2	1	asu|AgR010_g104_t05 cel|CE_K11D12.9 pun|PgR006_g161_t02 tca|Tcan_04172.1 tca|Tcan_04187.1
996	1	2	1	1	asu|AgR010_g137_t02 pun|PgR006_g186_t01 pun|PgR006_g187_t01 tca|Tcan_04157.1 cel|CE_T04H1.4a
997	1	1	2	1	asu|AgR010_g151_t01 cel|CE_C14C10.2a pun|PgR006_g200_t01 tca|Tcan_04125.1 tca|Tcan_04164.1
998	1	1	2	1	asu|AgR010_g155_t03 cel|CE_W01F3.3a pun|PgR085_g014_t01 tca|Tcan_05666.1 tca|Tcan_00463.1
999	1	1	2	1	asu|AgR010_g212_t10 cel|CE_C49H3.10a pun|PgR041_g017_t01 tca|Tcan_04751.1 tca|Tcan_07944.1
1000	1	1	2	1	asu|AgR010_g254_t01 cel|CE_Y51A2D.19a pun|PgR124_g008_t01 tca|Tcan_07338.1 tca|Tcan_18743.1
1001	1	1	2	1	asu|AgR010_g317_t03 cel|CE_C28C12.9 pun|PgB11_g053_t01 tca|Tcan_14582.1 tca|Tcan_14567.1
1002	1	1	2	1	asu|AgR011_g009_t05 cel|CE_F39H11.2a pun|PgR027_g072_t01 tca|Tcan_11170.1 tca|Tcan_05989.1
1003	2	1	1	1	asu|AgR011_g024_t02 cel|CE_F36A2.2 pun|PgR027_g086_t01 tca|Tcan_15085.1 asu|AgR029_g124_t04
1004	2	1	1	1	asu|AgR011_g074_t04 cel|CE_H13N06.4a tca|Tcan_08751.1 asu|AgR011_g075_t03 pun|PgR077_g020_t03
1005	1	1	2	1	asu|AgR011_g166_t03 cel|CE_C38C10.5a pun|PgR008_g025_t02 tca|Tcan_08585.1 tca|Tcan_08583.1
1006	1	1	2	1	asu|AgR011_g220_t01 cel|CE_F13E6.5 pun|PgR011_g108_t02 tca|Tcan_00388.1 tca|Tcan_11321.1
1007	1	1	2	1	asu|AgR011_g224_t01 cel|CE_R10H10.7 pun|PgR011_g103_t03 tca|Tcan_04434.1 tca|Tcan_04446.1
1008	1	2	1	1	asu|AgR011_g231_t07 cel|CE_Y71H10B.1a pun|PgR011_g099_t01 tca|Tcan_15916.1 pun|PgR119X_g019_t01
1009	2	1	1	1	asu|AgR012_g030_t02 pun|PgR037_g093_t02 tca|Tcan_07977.1 asu|AgR012_g032_t01 cel|CE_Y105C5A.15a
1010	2	1	1	1	asu|AgR012_g064_t08 tca|Tcan_02893.1 asu|AgR105_g001_t02 cel|CE_C26E6.12 pun|PgR037_g070_t01
1011	1	1	2	1	asu|AgR012_g153_t02 cel|CE_T07A9.6 pun|PgR016_g012_t01 tca|Tcan_15315.1 tca|Tcan_10952.1
1012	2	1	1	1	asu|AgR012_g169_t06 pun|PgR016_g023_t02 tca|Tcan_06623.1 asu|AgR012_g170_t01 cel|CE_F07C3.4
1013	1	1	2	1	asu|AgR012_g190_t04 cel|CE_T01G1.1a pun|PgR016_g037_t05 tca|Tcan_09676.1 tca|Tcan_09678.1
1014	2	1	1	1	asu|AgR012_g283_t02 cel|CE_C10C6.6 pun|PgR016_g116_t02 asu|AgR029_g070_t02 tca|Tcan_16128.1
1015	1	1	2	1	asu|AgR013X_g034_t02 cel|CE_Y34D9A.2 pun|PgR005X_g097_t03 tca|Tcan_02309.1 tca|Tcan_06582.1
1016	1	2	1	1	asu|AgR013X_g057_t01 cel|CE_M04C9.5a pun|PgR005X_g069_t01 tca|Tcan_12919.1 pun|PgR005X_g071_t01
1017	1	1	2	1	asu|AgR013X_g087_t03 cel|CE_R119.2 pun|PgR005X_g040_t03 tca|Tcan_04323.1 tca|Tcan_04329.1
1018	1	1	2	1	asu|AgR013X_g115_t04 cel|CE_T08G11.1a pun|PgR056X_g065_t01 tca|Tcan_09366.1 tca|Tcan_16328.1
1019	2	1	1	1	asu|AgR013X_g158_t01 cel|CE_F55F8.9a tca|Tcan_09328.1 asu|AgR013X_g159_t01 pun|PgR056X_g026_t03
1020	1	2	1	1	asu|AgR013X_g197_t01 cel|CE_K10C3.5a pun|PgR005X_g001_t01 pun|PgR052_g072_t01 tca|Tcan_06601.1
1021	1	1	2	1	asu|AgR013X_g236_t01 pun|PgR052_g036_t01 tca|Tcan_00333.1 cel|CE_K05C4.5 tca|Tcan_12388.1
1022	1	1	2	1	asu|AgR014X_g009_t01 cel|CE_F32H2.5 pun|PgB02X_g186_t02 tca|Tcan_12850.1 tca|Tcan_12854.1
1023	1	2	1	1	asu|AgR014X_g018_t01 cel|CE_Y49A3A.2 pun|PgB02X_g180_t01 pun|PgR007_g001_t01 tca|Tcan_12848.1
1024	1	2	1	1	asu|AgR014X_g025_t03 cel|CE_Y54H5A.3 pun|PgB02X_g177_t01 tca|Tcan_12828.1 pun|PgB02X_g173_t01
1025	1	1	2	1	asu|AgR014X_g062_t01 cel|CE_F01E11.5a pun|PgB02X_g140_t01 tca|Tcan_07607.1 tca|Tcan_07582.1
1026	2	1	1	1	asu|AgR014X_g071_t01 tca|Tcan_07574.1 asu|AgR014X_g073_t04 cel|CE_Y57G11C.17a pun|PgB02X_g132_t01
1027	1	1	2	1	asu|AgR014X_g082_t10 cel|CE_F55H12.3 pun|PgB02X_g121_t05 tca|Tcan_04493.1 tca|Tcan_04499.1
1028	1	1	2	1	asu|AgR014X_g208_t20 cel|CE_R04B3.2 pun|PgR022X_g065_t06 tca|Tcan_06066.1 tca|Tcan_06024.1
1029	2	1	1	1	asu|AgR015_g074_t01 pun|PgB03_g010_t02 asu|AgR015_g077_t01 tca|Tcan_12662.1 cel|CE_C33F10.7a
1030	1	1	2	1	asu|AgR015_g192_t02 cel|CE_Y75B7AL.2a pun|PgB05_g017_t02 tca|Tcan_08512.1 tca|Tcan_08548.1
1031	1	1	2	1	asu|AgR015_g238_t02 cel|CE_C25H3.6a pun|PgB22_g029_t02 tca|Tcan_16644.1 tca|Tcan_16647.1
1032	1	2	1	1	asu|AgR016_g009_t01 cel|CE_Y71H2B.10a pun|PgR019_g053_t02 pun|PgR019_g054_t03 tca|Tcan_03596.1
1033	1	1	2	1	asu|AgR016_g046_t02 cel|CE_H09F14.1a pun|PgR096_g011_t01 tca|Tcan_08483.1 tca|Tcan_02148.1
1034	1	2	1	1	asu|AgR016_g070_t01 cel|CE_K07C5.8 pun|PgR096_g026_t01 tca|Tcan_07301.1 pun|PgR057_g001_t01
1035	2	1	1	1	asu|AgR016_g119_t01 pun|PgR064_g012_t03 asu|AgR016_g121_t01 cel|CE_C08B11.4 tca|Tcan_09032.1
1036	1	1	2	1	asu|AgR016_g133_t04 cel|CE_Y43H11AL.3a pun|PgR064_g001_t02 tca|Tcan_05896.1 tca|Tcan_11527.1
1037	1	2	1	1	asu|AgR016_g202_t01 cel|CE_T05H10.8 pun|PgR011_g142_t01 tca|Tcan_06515.1 pun|PgR011_g143_t01
1038	1	1	2	1	asu|AgR017_g113_t03 cel|CE_ZK112.2a pun|PgR008_g206_t01 tca|Tcan_05374.1 tca|Tcan_16360.1
1039	1	1	2	1	asu|AgR017_g121_t02 cel|CE_ZK637.1 pun|PgR008_g203_t01 tca|Tcan_05678.1 tca|Tcan_16361.1
1040	1	2	1	1	asu|AgR017_g144_t03 cel|CE_R02F2.2 pun|PgR008_g182_t01 tca|Tcan_14622.1 pun|PgR008_g181_t01
1041	1	1	2	1	asu|AgR017_g240_t02 cel|CE_T20G5.14a pun|PgR047_g034_t01 tca|Tcan_13141.1 tca|Tcan_13137.1
1042	1	1	1	2	asu|AgR018X_g046_t01 cel|CE_T14G8.3a cel|CE_T24H7.2 pun|PgR032X_g071_t01 tca|Tcan_18013.1
1043	1	1	2	1	asu|AgR018X_g049_t02 cel|CE_F15D4.1 pun|PgR032X_g068_t01 tca|Tcan_05008.1 tca|Tcan_18016.1
1044	1	1	2	1	asu|AgR018X_g077_t01 cel|CE_F29B9.6 pun|PgB10_g035_t04 tca|Tcan_10875.1 tca|Tcan_09122.1
1045	1	1	2	1	asu|AgR018X_g188_t02 cel|CE_K06A1.1 pun|PgR023_g046_t02 tca|Tcan_09715.1 tca|Tcan_03207.1
1046	1	1	2	1	asu|AgR018X_g217_t01 cel|CE_Y110A7A.9a pun|PgR023_g076_t01 tca|Tcan_17604.1 tca|Tcan_02352.1
1047	2	1	1	1	asu|AgR019X_g024_t03 cel|CE_Y18D10A.13 pun|PgB12X_g047_t02 tca|Tcan_09713.1 asu|AgR019X_g026_t02
1048	1	1	2	1	asu|AgR019X_g053_t05 pun|PgB12X_g025_t02 tca|Tcan_11344.1 tca|Tcan_11367.1 cel|CE_K04G2.8a
1049	1	1	2	1	asu|AgR019X_g068_t03 cel|CE_C17D12.2a pun|PgB12X_g016_t01 tca|Tcan_11355.1 tca|Tcan_11353.1
1050	1	1	2	1	asu|AgR019X_g172_t01 cel|CE_ZC123.3a pun|PgB27X_g006_t02 tca|Tcan_13917.1 tca|Tcan_09720.1
1051	1	1	2	1	asu|AgR019X_g199_t03 cel|CE_C41C4.4a pun|PgR022X_g116_t02 tca|Tcan_06023.1 tca|Tcan_06029.1
1052	2	1	1	1	asu|AgR020_g076_t01 pun|PgB04_g048_t05 asu|AgR020_g077_t02 cel|CE_C27B7.4 tca|Tcan_03741.1
1053	1	1	1	2	asu|AgR020_g080_t04 cel|CE_C05D10.3 cel|CE_F02E11.1 pun|PgB04_g044_t06 tca|Tcan_03763.1
1054	1	1	2	1	asu|AgR020_g089_t01 cel|CE_T05E11.5 pun|PgB04_g037_t01 tca|Tcan_02288.1 tca|Tcan_02524.1
1055	1	1	2	1	asu|AgR020_g106_t01 cel|CE_T28B8.2 pun|PgR026_g099_t01 tca|Tcan_14218.1 tca|Tcan_15479.1
1056	1	1	2	1	asu|AgR020_g157_t01 cel|CE_F53C11.7 pun|PgR085_g003_t01 tca|Tcan_11642.1 tca|Tcan_11638.1
1057	1	1	2	1	asu|AgR020_g229_t02 cel|CE_F55C5.7a pun|PgB17_g056_t01 tca|Tcan_17686.1 tca|Tcan_10756.1
1058	1	1	2	1	asu|AgR021X_g053_t03 cel|CE_K10C8.2 pun|PgR120_g009_t01 tca|Tcan_00431.1 tca|Tcan_03884.1
1059	1	1	2	1	asu|AgR021X_g131_t01 pun|PgR051X_g057_t01 tca|Tcan_15127.1 cel|CE_Y71A12B.9 tca|Tcan_15126.1
1060	1	1	2	1	asu|AgR021X_g182_t01 cel|CE_B0035.14a pun|PgB04_g002_t01 tca|Tcan_02440.1 tca|Tcan_15592.1
1061	2	1	1	1	asu|AgR021X_g183_t03 cel|CE_F38A5.13 asu|AgR021X_g184_t02 pun|PgB04_g003_t01 tca|Tcan_15593.1
1062	1	2	1	1	asu|AgR021X_g197_t01 cel|CE_C47E12.6 pun|PgR041_g096_t01 pun|PgR041_g097_t01 tca|Tcan_07274.1
1063	1	2	1	1	asu|AgR022_g109_t01 cel|CE_C17G1.6a pun|PgR003_g163_t02 pun|PgR015_g031_t01 tca|Tcan_13293.1
1064	1	2	1	1	asu|AgR023_g076_t02 cel|CE_K08C7.3a pun|PgR072X_g039_t01 tca|Tcan_12794.1 pun|PgR162X_g003_t03
1065	2	1	1	1	asu|AgR024_g024_t02 cel|CE_F49E7.1a pun|PgR039_g001_t02 tca|Tcan_08755.1 asu|AgR092_g002_t01
1066	1	2	1	1	asu|AgR024_g069_t05 cel|CE_C30B5.4 pun|PgE374_g001_t01 tca|Tcan_02370.1 pun|PgR039_g040_t01
1067	2	1	1	1	asu|AgR025_g019_t01 pun|PgR062_g046_t01 asu|AgR025_g020_t03 cel|CE_T22A3.5a tca|Tcan_11481.1
1068	1	1	2	1	asu|AgR025_g042_t01 cel|CE_C32F10.6 pun|PgR018_g093_t01 tca|Tcan_02480.1 tca|Tcan_06758.1
1069	2	1	1	1	asu|AgR025_g049_t03 cel|CE_W04A4.5 pun|PgR018_g103_t02 tca|Tcan_13034.1 asu|AgR025_g050_t02
1070	2	1	1	1	asu|AgR025_g060_t02 pun|PgR018_g112_t06 tca|Tcan_18374.1 asu|AgR030_g098_t01 cel|CE_F25G6.9
1071	2	1	1	1	asu|AgR025_g087_t03 cel|CE_T20G5.1 pun|PgR069_g028_t06 tca|Tcan_17422.1 asu|AgR025_g089_t02
1072	1	2	1	1	asu|AgR026_g044_t01 cel|CE_F26D11.11a pun|PgR090_g025_t01 pun|PgR102_g040_t02 tca|Tcan_05180.1
1073	1	1	2	1	asu|AgR026_g047_t01 cel|CE_F46C8.5 pun|PgR090_g029_t01 tca|Tcan_05188.1 tca|Tcan_05193.1
1074	1	1	1	2	asu|AgR026_g125_t07 cel|CE_C37C3.9 pun|PgR071_g004_t01 tca|Tcan_13624.1 cel|CE_F32H2.2a
1075	2	1	1	1	asu|AgR026_g135_t01 cel|CE_T27B1.1 pun|PgR071_g013_t01 tca|Tcan_13603.1 asu|AgR026_g137_t02
1076	1	2	1	1	asu|AgR026_g140_t02 cel|CE_R07B1.9 pun|PgE248_g001_t01 tca|Tcan_08778.1 pun|PgR071_g018_t02
1077	1	1	1	2	asu|AgR027X_g083_t01 cel|CE_F22B5.4 pun|PgR074X_g034_t01 tca|Tcan_02968.1 cel|CE_F36A2.7
1078	1	1	2	1	asu|AgR027X_g128_t03 cel|CE_T08A9.1 pun|PgR001X_g235_t01 tca|Tcan_08080.1 tca|Tcan_08087.1
1079	2	1	1	1	asu|AgR028_g048_t01 cel|CE_F33H2.2 pun|PgR128_g004_t01 tca|Tcan_10101.1 asu|AgR028_g049_t02
1080	1	1	2	1	asu|AgR028_g053_t03 cel|CE_Y47D3A.22 pun|PgR128_g008_t03 tca|Tcan_06752.1 tca|Tcan_06754.1
1081	1	1	2	1	asu|AgR028_g062_t01 cel|CE_F32A7.3a pun|PgR128_g013_t02 tca|Tcan_06712.1 tca|Tcan_01913.1
1082	1	1	1	2	asu|AgR029_g089_t01 cel|CE_Y52B11A.3a tca|Tcan_06089.1 cel|CE_F25H2.1 pun|PgR027_g131_t01
1083	1	2	1	1	asu|AgR029_g093_t01 cel|CE_F46F11.1a pun|PgR027_g130_t02 pun|PgR139_g001_t01 tca|Tcan_06093.1
1084	1	2	1	1	asu|AgR030_g041_t01 cel|CE_C04F6.3 pun|PgR024_g082_t01 tca|Tcan_05090.1 pun|PgB16_g055_t02
1085	1	2	1	1	asu|AgR030_g059_t01 cel|CE_T10C6.5 pun|PgR024_g096_t01 tca|Tcan_14667.1 pun|PgR011_g078_t01
1086	1	1	2	1	asu|AgR030_g080_t14 cel|CE_C48G7.3a pun|PgR024_g113_t01 tca|Tcan_18229.1 tca|Tcan_18230.1
1087	1	1	2	1	asu|AgR031_g025_t03 pun|PgR048_g026_t02 tca|Tcan_10508.1 cel|CE_Y67D2.6 tca|Tcan_10501.1
1088	2	1	1	1	asu|AgR031_g041_t01 pun|PgR048_g016_t02 tca|Tcan_10475.1 asu|AgR031_g042_t01 cel|CE_D2089.3
1089	2	1	1	1	asu|AgR031_g116_t01 cel|CE_Y106G6H.5 pun|PgR131_g011_t13 tca|Tcan_05240.1 asu|AgR031_g117_t05
1090	2	1	1	1	asu|AgR033_g064_t02 tca|Tcan_15769.1 asu|AgR033_g066_t01 pun|PgB15_g018_t01 cel|CE_T07A9.5a
1091	2	1	1	1	asu|AgR033_g129_t01 cel|CE_T22F3.3a pun|PgR006_g024_t06 tca|Tcan_04142.1 asu|AgR177_g001_t01
1092	1	2	1	1	asu|AgR034_g008_t02 cel|CE_T23F2.2a pun|PgR076_g028_t06 pun|PgR228_g003_t03 tca|Tcan_15350.1
1093	1	1	2	1	asu|AgR034_g028_t01 cel|CE_F35H12.2a pun|PgR076_g012_t16 tca|Tcan_10415.1 tca|Tcan_13706.1
1094	1	1	2	1	asu|AgR034_g069_t04 pun|PgR030_g101_t01 tca|Tcan_08289.1 tca|Tcan_08292.1 cel|CE_F45E12.3
1095	2	1	1	1	asu|AgR034_g098_t01 pun|PgR017X_g082_t01 tca|Tcan_02634.1 asu|AgR175X_g001_t01 cel|CE_Y51A2D.15a
1096	1	1	2	1	asu|AgR035X_g012_t02 cel|CE_T27A3.2 pun|PgB24X_g021_t01 tca|Tcan_11962.1 tca|Tcan_12008.1
1097	1	1	2	1	asu|AgR035X_g018_t05 cel|CE_ZK337.1a pun|PgB24X_g013_t03 tca|Tcan_11990.1 tca|Tcan_12026.1
1098	1	1	2	1	asu|AgR035X_g062_t01 cel|CE_C44E4.1a pun|PgR005X_g154_t01 tca|Tcan_05786.1 tca|Tcan_07372.1
1099	1	1	2	1	asu|AgR035X_g074_t05 cel|CE_ZK270.2a pun|PgR005X_g149_t01 tca|Tcan_05792.1 tca|Tcan_02697.1
1100	1	2	1	1	asu|AgR035X_g083_t03 pun|PgR005X_g141_t03 tca|Tcan_16355.1 cel|CE_C12C8.3a pun|PgR005X_g140_t02
1101	1	1	2	1	asu|AgR035X_g085_t03 cel|CE_F25F8.1 pun|PgR005X_g138_t01 tca|Tcan_16356.1 tca|Tcan_16327.1
1102	1	2	1	1	asu|AgR036X_g049_t04 cel|CE_K09B11.9a pun|PgR095X_g015_t01 pun|PgR095X_g033_t01 tca|Tcan_09341.1
1103	1	1	2	1	asu|AgR036X_g061_t01 cel|CE_B0546.2a pun|PgR001X_g232_t01 tca|Tcan_06725.1 tca|Tcan_08283.1
1104	1	1	2	1	asu|AgR036X_g065_t01 cel|CE_M70.4a pun|PgR208X_g005_t01 tca|Tcan_15683.1 tca|Tcan_00342.1
1105	1	1	2	1	asu|AgR036X_g071_t05 cel|CE_F47C12.2 pun|PgR001X_g219_t01 tca|Tcan_15679.1 tca|Tcan_15677.1
1106	1	1	2	1	asu|AgR037_g066_t03 cel|CE_T05C3.6a pun|PgR089_g002_t02 tca|Tcan_08714.1 tca|Tcan_08715.1
1107	1	1	2	1	asu|AgR037_g119_t04 cel|CE_C52E4.6a pun|PgR073_g011_t01 tca|Tcan_05082.1 tca|Tcan_05085.1
1108	1	2	1	1	asu|AgR038_g043_t17 cel|CE_F08B4.2a pun|PgR028_g080_t01 tca|Tcan_17185.1 pun|PgR028_g081_t01
1109	2	1	1	1	asu|AgR038_g074_t01 tca|Tcan_13779.1 asu|AgR038_g075_t01 cel|CE_H35B03.1 pun|PgR028_g052_t01
1110	1	1	2	1	asu|AgR038_g089_t05 cel|CE_F52D10.3a pun|PgB19_g015_t01 tca|Tcan_05725.1 tca|Tcan_04553.1
1111	1	2	1	1	asu|AgR038_g092_t09 cel|CE_F25H2.10 pun|PgB19_g013_t02 tca|Tcan_18186.1 pun|PgB01_g206_t01
1112	1	2	1	1	asu|AgR039_g119_t01 cel|CE_M88.6a pun|PgR043_g038_t01 pun|PgR241X_g003_t01 tca|Tcan_13152.1
1113	1	1	2	1	asu|AgR040X_g070_t01 cel|CE_Y51H1A.5 pun|PgB02X_g210_t02 tca|Tcan_08976.1 tca|Tcan_09004.1
1114	2	1	1	1	asu|AgR041_g038_t02 cel|CE_W06H8.8a pun|PgB13_g065_t01 tca|Tcan_07171.1 asu|AgR041_g041_t01
1115	1	2	1	1	asu|AgR041_g086_t01 cel|CE_C50B8.3 pun|PgR192_g007_t01 tca|Tcan_14724.1 pun|PgR192_g006_t01
1116	2	1	1	1	asu|AgR042X_g001_t02 cel|CE_T08H4.1a pun|PgB30_g003_t03 tca|Tcan_18983.1 asu|AgR078_g002_t02
1117	1	1	2	1	asu|AgR043_g081_t04 cel|CE_Y55D5A.5a pun|PgB10_g070_t02 tca|Tcan_14296.1 tca|Tcan_14375.1
1118	2	1	1	1	asu|AgR043_g086_t04 cel|CE_F54C8.4a tca|Tcan_14297.1 asu|AgR043_g087_t01 pun|PgB10_g066_t01
1119	2	1	1	1	asu|AgR044_g013_t02 pun|PgR019_g047_t01 asu|AgR044_g016_t01 cel|CE_R151.1a tca|Tcan_11622.1
1120	1	1	2	1	asu|AgR044_g050_t02 cel|CE_Y66D12A.9 pun|PgR036_g026_t01 tca|Tcan_06537.1 tca|Tcan_02214.1
1121	1	2	1	1	asu|AgR047_g033_t02 cel|CE_Y51A2D.7b pun|PgR006_g045_t01 pun|PgR006_g046_t01 tca|Tcan_18447.1
1122	1	1	2	1	asu|AgR048X_g010_t04 pun|PgB07_g009_t03 tca|Tcan_14158.1 tca|Tcan_14162.1 cel|CE_B0496.3a
1123	1	1	2	1	asu|AgR049_g065_t02 cel|CE_C04F6.7 pun|PgR059_g004_t03 tca|Tcan_11009.1 tca|Tcan_11656.1
1124	1	1	1	2	asu|AgR051X_g022_t03 cel|CE_F40F8.7 tca|Tcan_15256.1 cel|CE_F10B5.3 pun|PgB14X_g027_t02
1125	1	1	2	1	asu|AgR051X_g025_t06 cel|CE_Y105C5B.21a pun|PgB14X_g030_t02 tca|Tcan_06126.1 tca|Tcan_12756.1
1126	2	1	1	1	asu|AgR052_g008_t04 cel|CE_K10D2.1a pun|PgR058_g053_t02 tca|Tcan_10706.1 asu|AgR052_g009_t02
1127	1	1	2	1	tca|Tcan_04735.1 asu|AgR052_g046_t02 pun|PgR075_g056_t05 tca|Tcan_02805.1 cel|CE_C24H11.7a
1128	1	2	1	1	asu|AgR052_g048_t01 cel|CE_C14B1.10 pun|PgR075_g052_t05 tca|Tcan_02803.1 pun|PgR075_g053_t01
1129	2	1	1	1	asu|AgR054_g021_t05 cel|CE_F48C1.1 pun|PgR090_g013_t01 asu|AgR054_g022_t01 tca|Tcan_03037.1
1130	1	1	2	1	asu|AgR055_g056_t01 cel|CE_T23H2.1 pun|PgR066_g052_t02 tca|Tcan_03686.1 tca|Tcan_08220.1
1131	1	1	2	1	asu|AgR057_g028_t12 cel|CE_ZK1067.2a pun|PgR066_g014_t02 tca|Tcan_02931.1 tca|Tcan_02934.1
1132	1	2	1	1	asu|AgR062_g011_t01 cel|CE_C35B8.2a pun|PgR031_g108_t03 pun|PgR142_g008_t01 tca|Tcan_18916.1
1133	1	2	1	1	asu|AgR063_g014_t03 cel|CE_T25F10.5 pun|PgR057_g048_t01 tca|Tcan_16906.1 pun|PgR057_g047_t01
1134	2	1	1	1	asu|AgR069_g009_t01 pun|PgR020_g078_t04 tca|Tcan_17884.1 asu|AgR069_g011_t05 cel|CE_C56E6.6
1135	2	1	1	1	asu|AgR069_g015_t04 cel|CE_T25D3.2 tca|Tcan_11551.1 asu|AgR206X_g001_t01 pun|PgR020_g074_t02
1136	1	1	2	1	asu|AgR077_g004_t03 cel|CE_K08F8.4a pun|PgB30_g007_t04 tca|Tcan_13156.1 tca|Tcan_13159.1
1137	1	1	2	1	asu|AgR077_g008_t01 cel|CE_C03H5.6 pun|PgB30_g006_t05 tca|Tcan_02134.1 tca|Tcan_02284.1
1138	1	1	2	1	asu|AgR161_g002_t01 pun|PgR004_g130_t01 tca|Tcan_10835.1 cel|CE_F10G8.8a tca|Tcan_10839.1
1139	1	1	1	1	cel|CE_F13A7.7 asu|AgB01_g107_t02 pun|PgR002_g204_t02 tca|Tcan_04017.1
1140	1	1	1	1	cel|CE_F33D11.11 asu|AgR013X_g013_t03 pun|PgR005X_g117_t01 tca|Tcan_15386.1
1141	1	1	1	1	cel|CE_W04G3.7 asu|AgR027X_g087_t01 pun|PgR074X_g035_t01 tca|Tcan_09775.1
1142	1	1	1	1	asu|AgB01_g009_t05 cel|CE_K02G10.7a pun|PgB19_g007_t01 tca|Tcan_05724.1
1143	1	1	1	1	asu|AgB01_g010_t04 pun|PgB19_g006_t01 tca|Tcan_05715.1 cel|CE_F59F4.3
1144	1	1	1	1	asu|AgB01_g012_t01 cel|CE_Y15E3A.1a pun|PgB19_g003_t01 tca|Tcan_02903.1
1145	1	1	1	1	asu|AgB01_g016_t01 cel|CE_C53C9.2 pun|PgR284_g001_t01 tca|Tcan_02908.1
1146	1	1	1	1	asu|AgB01_g018_t02 cel|CE_T05G5.6 pun|PgR284_g003_t01 tca|Tcan_03080.1
1147	1	1	1	1	asu|AgB01_g019_t01 cel|CE_Y87G2A.5 pun|PgR002_g282_t01 tca|Tcan_06830.1
1148	1	1	1	1	asu|AgB01_g027_t04 cel|CE_C01C10.3 pun|PgR002_g275_t01 tca|Tcan_06838.1
1149	1	1	1	1	asu|AgB01_g028_t09 pun|PgR002_g274_t03 tca|Tcan_04515.1 cel|CE_Y47H9C.4a
1150	1	1	1	1	asu|AgB01_g031_t01 cel|CE_F18H3.1 pun|PgR002_g272_t01 tca|Tcan_06835.1
1151	1	1	1	1	asu|AgB01_g050_t03 cel|CE_F52D10.2 pun|PgR002_g259_t01 tca|Tcan_04697.1
1152	1	1	1	1	asu|AgB01_g051_t01 pun|PgR002_g258_t01 tca|Tcan_04699.1 cel|CE_CD4.7a
1153	1	1	1	1	asu|AgB01_g061_t10 cel|CE_K02B12.3 pun|PgR002_g242_t03 tca|Tcan_14050.1
1154	1	1	1	1	asu|AgB01_g063_t01 cel|CE_F26F4.12 pun|PgR002_g241_t01 tca|Tcan_04693.1
1155	1	1	1	1	asu|AgB01_g064_t01 cel|CE_K02G10.1 pun|PgR002_g240_t01 tca|Tcan_05921.1
1156	1	1	1	1	asu|AgB01_g067_t01 cel|CE_T20D3.5 pun|PgR002_g237_t03 tca|Tcan_03432.1
1157	1	1	1	1	asu|AgB01_g073_t02 cel|CE_F27D9.5 pun|PgR002_g232_t02 tca|Tcan_11264.1
1158	1	1	1	1	asu|AgB01_g078_t02 cel|CE_T10E10.3 pun|PgR002_g231_t03 tca|Tcan_11266.1
1159	1	1	1	1	asu|AgB01_g085_t01 pun|PgR002_g226_t01 tca|Tcan_18882.1 cel|CE_T03G11.10
1160	1	1	1	1	asu|AgB01_g086_t02 cel|CE_C44C1.1 pun|PgR002_g225_t01 tca|Tcan_18881.1
1161	1	1	1	1	asu|AgB01_g093_t03 cel|CE_T03F1.2 pun|PgR002_g221_t01 tca|Tcan_18872.1
1162	1	1	1	1	asu|AgB01_g095_t03 pun|PgR002_g219_t02 tca|Tcan_18877.1 cel|CE_F11A3.2a
1163	1	1	1	1	asu|AgB01_g098_t01 cel|CE_C04C11.1a pun|PgR002_g214_t01 tca|Tcan_11265.1
1164	1	1	1	1	asu|AgB01_g099_t01 cel|CE_F58G11.1a pun|PgR002_g213_t01 tca|Tcan_11258.1
1165	1	1	1	1	asu|AgB01_g100_t08 pun|PgR002_g211_t01 tca|Tcan_11259.1 cel|CE_T01B6.1
1166	1	1	1	1	asu|AgB01_g102_t01 cel|CE_PDB1.1a pun|PgR002_g210_t01 tca|Tcan_03430.1
1167	1	1	1	1	asu|AgB01_g103_t01 cel|CE_Y48D7A.2 pun|PgR002_g209_t01 tca|Tcan_03428.1
1168	1	1	1	1	asu|AgB01_g105_t01 cel|CE_M60.2 pun|PgR002_g208_t01 tca|Tcan_07286.1
1169	1	1	1	1	asu|AgB01_g106_t03 cel|CE_C47C12.3a tca|Tcan_04012.1 pun|PgR002_g207_t01
1170	1	1	1	1	asu|AgB01_g127_t01 cel|CE_F38B6.5a pun|PgR002_g187_t01 tca|Tcan_11850.1
1171	1	1	1	1	asu|AgB01_g130_t04 cel|CE_C40C9.5a pun|PgR002_g185_t01 tca|Tcan_11845.1
1172	1	1	1	1	asu|AgB01_g136_t02 cel|CE_C02B4.2 pun|PgR002_g180_t01 tca|Tcan_11835.1
1173	1	1	1	1	asu|AgB01_g138_t01 cel|CE_T13H5.5 pun|PgR002_g179_t02 tca|Tcan_11833.1
1174	1	1	1	1	asu|AgB01_g140_t05 cel|CE_Y59A8B.6 pun|PgR002_g178_t01 tca|Tcan_11851.1
1175	1	1	1	1	asu|AgB01_g144_t05 pun|PgR002_g177_t01 tca|Tcan_14055.1 cel|CE_F45E6.2
1176	1	1	1	1	asu|AgB01_g145_t02 cel|CE_C31E10.7 pun|PgR002_g176_t01 tca|Tcan_14044.1
1177	1	1	1	1	asu|AgB01_g146_t01 cel|CE_B0272.2 pun|PgR002_g175_t01 tca|Tcan_14038.1
1178	1	1	1	1	asu|AgB01_g148_t01 cel|CE_F40F12.4 pun|PgR008_g112_t02 tca|Tcan_17309.1
1179	1	1	1	1	asu|AgB01_g150_t01 cel|CE_ZC376.6a pun|PgR008_g113_t07 tca|Tcan_17307.1
1180	1	1	1	1	asu|AgB01_g152_t01 cel|CE_W08A12.1a pun|PgR008_g118_t01 tca|Tcan_16730.1
1181	1	1	1	1	asu|AgB01_g167_t01 cel|CE_D1054.13a pun|PgR031_g069_t03 tca|Tcan_13524.1
1182	1	1	1	1	asu|AgB01_g173_t04 cel|CE_D1007.12 pun|PgR031_g080_t01 tca|Tcan_13510.1
1183	1	1	1	1	asu|AgB01_g176_t04 cel|CE_F42A6.7a pun|PgR031_g084_t01 tca|Tcan_13523.1
1184	1	1	1	1	asu|AgB01_g182_t01 cel|CE_C10E2.4 pun|PgR031_g087_t01 tca|Tcan_03622.1
1185	1	1	1	1	asu|AgB01_g194_t02 cel|CE_C01C10.1 pun|PgR031_g098_t01 tca|Tcan_13007.1
1186	1	1	1	1	asu|AgB01_g195_t02 tca|Tcan_13018.1 cel|CE_C01C10.4 pun|PgR031_g099_t01
1187	1	1	1	1	asu|AgB01_g199_t10 cel|CE_B0513.2a pun|PgB04_g094_t02 tca|Tcan_10009.1
1188	1	1	1	1	asu|AgB01_g200_t03 cel|CE_T19D2.2 pun|PgB04_g096_t01 tca|Tcan_10028.1
1189	1	1	1	1	asu|AgB01_g210_t04 cel|CE_H25P06.2a pun|PgB04_g107_t01 tca|Tcan_13664.1
1190	1	1	1	1	asu|AgB01_g216_t01 cel|CE_K02F3.10 pun|PgB04_g111_t02 tca|Tcan_13674.1
1191	1	1	1	1	asu|AgB01_g217_t02 cel|CE_K03D10.3a pun|PgB04_g112_t02 tca|Tcan_13662.1
1192	1	1	1	1	asu|AgB01_g218_t01 cel|CE_C34H3.1 pun|PgB04_g113_t01 tca|Tcan_13666.1
1193	1	1	1	1	asu|AgB01_g221_t03 cel|CE_Y71F9B.16a pun|PgB04_g115_t01 tca|Tcan_10780.1
1194	1	1	1	1	asu|AgB01_g223_t04 cel|CE_C39B10.1 pun|PgB04_g116_t01 tca|Tcan_03061.1
1195	1	1	1	1	asu|AgB01_g226_t06 pun|PgB04_g118_t02 tca|Tcan_16184.1 cel|CE_F23B12.8a
1196	1	1	1	1	asu|AgB01_g257_t05 cel|CE_T20F7.6 pun|PgB04_g142_t01 tca|Tcan_13445.1
1197	1	1	1	1	asu|AgB01_g258_t06 cel|CE_C56G2.3 pun|PgB04_g143_t01 tca|Tcan_13443.1
1198	1	1	1	1	asu|AgB01_g262_t06 cel|CE_C39D10.11 pun|PgB04_g146_t03 tca|Tcan_13448.1
1199	1	1	1	1	asu|AgB01_g269_t01 cel|CE_C25B8.3a pun|PgB04_g152_t02 tca|Tcan_11395.1
1200	1	1	1	1	asu|AgB01_g276_t01 cel|CE_F08F1.6 pun|PgB04_g159_t01 tca|Tcan_11441.1
1201	1	1	1	1	asu|AgB01_g281_t03 cel|CE_F47B10.7 pun|PgB04_g163_t04 tca|Tcan_11405.1
1202	1	1	1	1	asu|AgB01_g282_t02 pun|PgB04_g164_t01 tca|Tcan_11437.1 cel|CE_F17H10.2a
1203	1	1	1	1	asu|AgB01_g290_t07 pun|PgB04_g168_t01 tca|Tcan_11399.1 cel|CE_C16B8.4
1204	1	1	1	1	asu|AgB01_g292_t03 cel|CE_F09B12.2 pun|PgB04_g170_t02 tca|Tcan_11422.1
1205	1	1	1	1	asu|AgB01_g296_t07 cel|CE_F47B7.2a pun|PgB04_g172_t11 tca|Tcan_11408.1
1206	1	1	1	1	asu|AgB01_g297_t04 cel|CE_F57B10.6 pun|PgB04_g173_t06 tca|Tcan_11407.1
1207	1	1	1	1	asu|AgB01_g301_t01 cel|CE_C34D10.1 pun|PgB04_g177_t02 tca|Tcan_11382.1
1208	1	1	1	1	cel|CE_F26A3.4 tca|Tcan_06338.1 asu|AgB04_g135_t01 pun|PgR004_g082_t02
1209	1	1	1	1	asu|AgB01_g310_t03 pun|PgB04_g185_t05 tca|Tcan_11415.1 cel|CE_W09D10.3
1210	1	1	1	1	asu|AgB01_g316_t01 pun|PgB04_g190_t01 tca|Tcan_06476.1 cel|CE_D1009.3a
1211	1	1	1	1	asu|AgB01_g325_t03 cel|CE_C36E8.3 pun|PgR099_g007_t02 tca|Tcan_10483.1
1212	1	1	1	1	asu|AgB01_g333_t01 pun|PgR099_g001_t03 tca|Tcan_10499.1 cel|CE_C54G10.4a
1213	1	1	1	1	asu|AgB01_g334_t04 cel|CE_K10G9.2 pun|PgR054_g066_t01 tca|Tcan_10488.1
1214	1	1	1	1	asu|AgB01_g338_t01 cel|CE_ZK1128.1 pun|PgR054_g063_t02 tca|Tcan_10481.1
1215	1	1	1	1	asu|AgB01_g339_t02 cel|CE_Y38A10A.5 pun|PgR054_g062_t02 tca|Tcan_10519.1
1216	1	1	1	1	asu|AgB01_g340_t01 cel|CE_R12E2.9 pun|PgR054_g061_t01 tca|Tcan_10480.1
1217	1	1	1	1	asu|AgB01_g347_t07 cel|CE_F37A4.8 pun|PgR054_g056_t04 tca|Tcan_10512.1
1218	1	1	1	1	asu|AgB01_g351_t02 cel|CE_C07B5.4a pun|PgR054_g053_t01 tca|Tcan_10510.1
1219	1	1	1	1	asu|AgB01_g353_t02 pun|PgB13_g003_t01 tca|Tcan_16363.1 cel|CE_W03A5.4
1220	1	1	1	1	asu|AgB01_g354_t04 cel|CE_Y43F4B.5a pun|PgB13_g005_t03 tca|Tcan_16378.1
1221	1	1	1	1	asu|AgB01_g355_t05 cel|CE_Y71F9AM.5a pun|PgB13_g006_t01 tca|Tcan_16375.1
1222	1	1	1	1	asu|AgB01_g356_t05 cel|CE_K02F2.2 pun|PgB13_g007_t02 tca|Tcan_16379.1
1223	1	1	1	1	asu|AgB01_g357_t02 cel|CE_ZK1098.4 pun|PgB13_g009_t01 tca|Tcan_16371.1
1224	1	1	1	1	asu|AgB01_g360_t03 cel|CE_B0464.9 pun|PgB13_g010_t02 tca|Tcan_16382.1
1225	1	1	1	1	asu|AgB01_g365_t02 cel|CE_T21C12.1b pun|PgB13_g015_t05 tca|Tcan_16383.1
1226	1	1	1	1	asu|AgB01_g368_t03 cel|CE_K04C2.2 pun|PgB13_g017_t06 tca|Tcan_16366.1
1227	1	1	1	1	asu|AgB01_g369_t03 cel|CE_Y39A1A.14 pun|PgB13_g018_t01 tca|Tcan_16380.1
1228	1	1	1	1	asu|AgB01_g372_t01 cel|CE_Y39A1A.15a pun|PgR116_g001_t01 tca|Tcan_16370.1
1229	1	1	1	1	asu|AgB01_g378_t06 cel|CE_T27D1.3 pun|PgR116_g005_t01 tca|Tcan_12564.1
1230	1	1	1	1	asu|AgB01_g379_t07 pun|PgR116_g007_t01 tca|Tcan_12562.1 cel|CE_ZK899.1
1231	1	1	1	1	asu|AgB01_g381_t02 cel|CE_F10E9.4 pun|PgR048_g085_t01 tca|Tcan_12561.1
1232	1	1	1	1	asu|AgB01_g384_t10 cel|CE_Y48G9A.4 pun|PgR048_g083_t03 tca|Tcan_10490.1
1233	1	1	1	1	asu|AgB01_g386_t01 cel|CE_F43C1.1 pun|PgR048_g082_t02 tca|Tcan_10517.1
1234	1	1	1	1	asu|AgB01_g389_t01 cel|CE_Y43F4B.4 pun|PgR048_g077_t08 tca|Tcan_16369.1
1235	1	1	1	1	asu|AgB01_g392_t01 cel|CE_C38H2.1a pun|PgR048_g076_t01 tca|Tcan_18303.1
1236	1	1	1	1	asu|AgB01_g398_t04 pun|PgR048_g072_t08 tca|Tcan_18299.1 cel|CE_T25B6.7
1237	1	1	1	1	asu|AgB01_g401_t05 cel|CE_Y50D7A.4 pun|PgR048_g070_t05 tca|Tcan_18305.1
1238	1	1	1	1	asu|AgB01_g403_t04 cel|CE_B0285.1a pun|PgR048_g068_t03 tca|Tcan_18306.1
1239	1	1	1	1	asu|AgB01_g406_t03 cel|CE_R01H10.3a pun|PgR048_g066_t01 tca|Tcan_10734.1
1240	1	1	1	1	asu|AgB01_g407_t04 cel|CE_K01G5.5 pun|PgR048_g065_t01 tca|Tcan_10736.1
1241	1	1	1	1	asu|AgB01_g409_t01 cel|CE_K01G5.4 pun|PgR048_g064_t03 tca|Tcan_10728.1
1242	1	1	1	1	asu|AgB01_g414_t01 cel|CE_T28D6.6a pun|PgR048_g059_t05 tca|Tcan_10723.1
1243	1	1	1	1	asu|AgB01_g422_t02 cel|CE_F54E7.2 pun|PgR048_g054_t02 tca|Tcan_11819.1
1244	1	1	1	1	asu|AgB01_g424_t01 cel|CE_F54E7.7 pun|PgR048_g052_t01 tca|Tcan_11775.1
1245	1	1	1	1	asu|AgB01_g426_t01 cel|CE_C05D10.2a pun|PgR048_g051_t01 tca|Tcan_11787.1
1246	1	1	1	1	asu|AgB01_g436_t01 cel|CE_Y39B6A.3a pun|PgR104_g030_t01 tca|Tcan_05349.1
1247	1	1	1	1	asu|AgB01_g455_t06 cel|CE_K09E9.2 pun|PgB42_g002_t01 tca|Tcan_06775.1
1248	1	1	1	1	asu|AgB01_g456_t01 pun|PgB42_g003_t01 tca|Tcan_01916.1 cel|CE_Y54G9A.9
1249	1	1	1	1	asu|AgB01_g464_t01 pun|PgR015_g147_t07 tca|Tcan_10417.1 cel|CE_T27A10.7
1250	1	1	1	1	asu|AgB01_g478_t02 cel|CE_C44B7.1 pun|PgR015_g133_t05 tca|Tcan_10333.1
1251	1	1	1	1	asu|AgB01_g479_t02 cel|CE_C44B7.2a pun|PgR015_g130_t02 tca|Tcan_10325.1
1252	1	1	1	1	asu|AgB01_g484_t02 cel|CE_C17H11.6a pun|PgR015_g125_t12 tca|Tcan_02813.1
1253	1	1	1	1	asu|AgB01_g488_t01 cel|CE_F46G11.1 pun|PgR015_g122_t01 tca|Tcan_12409.1
1254	1	1	1	1	asu|AgB01_g492_t03 cel|CE_F11D5.3a pun|PgR015_g118_t01 tca|Tcan_11049.1
1255	1	1	1	1	asu|AgB01_g494_t07 cel|CE_T12G3.8a pun|PgR015_g117_t01 tca|Tcan_11057.1
1256	1	1	1	1	asu|AgB01_g503_t01 cel|CE_C25F6.7a pun|PgR015_g110_t01 tca|Tcan_08669.1
1257	1	1	1	1	asu|AgB01_g507_t01 cel|CE_F16F9.4 pun|PgR015_g101_t01 tca|Tcan_08675.1
1258	1	1	1	1	asu|AgB01_g508_t01 cel|CE_C54G7.1 pun|PgR015_g107_t01 tca|Tcan_08671.1
1259	1	1	1	1	asu|AgB01_g516_t01 cel|CE_F41G4.1 pun|PgR015_g099_t01 tca|Tcan_08665.1
1260	1	1	1	1	asu|AgB01_g521_t01 cel|CE_R08B4.3 pun|PgR015_g096_t01 tca|Tcan_03607.1
1261	1	1	1	1	asu|AgB01_g523_t04 cel|CE_K12H4.5 pun|PgR015_g093_t05 tca|Tcan_03608.1
1262	1	1	1	1	asu|AgB01_g526_t04 cel|CE_C34G6.7a pun|PgR015_g089_t06 tca|Tcan_04004.1
1263	1	1	1	1	asu|AgB01_g530_t04 cel|CE_F59D12.1 pun|PgR015_g087_t01 tca|Tcan_04016.1
1264	1	1	1	1	asu|AgB01_g536_t01 cel|CE_ZK154.7 pun|PgR015_g081_t03 tca|Tcan_04019.1
1265	1	1	1	1	asu|AgB01_g541_t01 cel|CE_C39D10.6 pun|PgR015_g077_t01 tca|Tcan_11050.1
1266	1	1	1	1	asu|AgB01_g546_t01 cel|CE_T23C6.5 pun|PgR015_g073_t01 tca|Tcan_11052.1
1267	1	1	1	1	asu|AgB01_g547_t01 cel|CE_F56B6.5a pun|PgR015_g072_t01 tca|Tcan_11048.1
1268	1	1	1	1	asu|AgB01_g554_t01 cel|CE_C48C5.3 pun|PgR015_g069_t01 tca|Tcan_11054.1
1269	1	1	1	1	asu|AgB01_g573_t07 cel|CE_Y71F9AL.1 pun|PgR015_g063_t04 tca|Tcan_15104.1
1270	1	1	1	1	asu|AgB01_g574_t09 cel|CE_F15A8.6a pun|PgR015_g062_t02 tca|Tcan_15087.1
1271	1	1	1	1	asu|AgB01_g582_t05 cel|CE_Y39G10AR.2a pun|PgR015_g058_t01 tca|Tcan_18515.1
1272	1	1	1	1	asu|AgB01_g584_t01 cel|CE_F45F2.9a pun|PgR015_g056_t01 tca|Tcan_10080.1
1273	1	1	1	1	asu|AgB01_g586_t04 cel|CE_F10B5.1 pun|PgR015_g055_t01 tca|Tcan_10084.1
1274	1	1	1	1	asu|AgB01_g588_t01 cel|CE_F28B3.7a pun|PgR015_g052_t04 tca|Tcan_10066.1
1275	1	1	1	1	asu|AgB01_g592_t01 cel|CE_F35G8.2 pun|PgR015_g048_t01 tca|Tcan_10074.1
1276	1	1	1	1	asu|AgB01_g597_t01 cel|CE_C17G1.7 pun|PgR015_g029_t01 tca|Tcan_10072.1
1277	1	1	1	1	asu|AgB01_g600_t03 cel|CE_C03F11.1 pun|PgR015_g032_t01 tca|Tcan_10076.1
1278	1	1	1	1	asu|AgB01_g601_t01 cel|CE_F08C6.6 pun|PgR015_g033_t04 tca|Tcan_10644.1
1279	1	1	1	1	asu|AgB01_g602_t05 cel|CE_F27C1.2a pun|PgR015_g034_t05 tca|Tcan_10647.1
1280	1	1	1	1	asu|AgB01_g608_t02 pun|PgR015_g038_t01 tca|Tcan_10645.1 cel|CE_D2092.2
1281	1	1	1	1	asu|AgB01_g619_t02 cel|CE_C23G10.4a pun|PgR142_g006_t01 tca|Tcan_12950.1
1282	1	1	1	1	asu|AgB01_g622_t03 cel|CE_C48D1.2a pun|PgR149_g009_t01 tca|Tcan_12942.1
1283	1	1	1	1	asu|AgB01_g632_t01 cel|CE_D2023.4 pun|PgR149_g004_t01 tca|Tcan_18244.1
1284	1	1	1	1	asu|AgB01_g633_t02 cel|CE_F38B6.6 pun|PgR149_g003_t01 tca|Tcan_18240.1
1285	1	1	1	1	asu|AgB01_g644_t03 cel|CE_C55B6.2 pun|PgR010_g012_t01 tca|Tcan_05718.1
1286	1	1	1	1	asu|AgB01_g645_t01 cel|CE_ZK652.4 pun|PgR010_g013_t01 tca|Tcan_05748.1
1287	1	1	1	1	asu|AgB01_g648_t01 cel|CE_Y34B4A.3 pun|PgR010_g015_t01 tca|Tcan_05729.1
1288	1	1	1	1	asu|AgB01_g649_t01 cel|CE_T01D3.2 pun|PgR010_g016_t01 tca|Tcan_05731.1
1289	1	1	1	1	asu|AgB01_g658_t03 cel|CE_C02C6.3a pun|PgR010_g022_t01 tca|Tcan_05728.1
1290	1	1	1	1	asu|AgB01_g661_t01 cel|CE_B0280.9 pun|PgR010_g024_t03 tca|Tcan_18245.1
1291	1	1	1	1	asu|AgB01_g676_t01 cel|CE_R166.4 pun|PgR010_g033_t02 tca|Tcan_10412.1
1292	1	1	1	1	asu|AgB01_g682_t01 cel|CE_Y43B11AR.3 pun|PgR010_g037_t01 tca|Tcan_10393.1
1293	1	1	1	1	asu|AgB01_g691_t03 cel|CE_F09G2.4 pun|PgR010_g043_t04 tca|Tcan_10411.1
1294	1	1	1	1	asu|AgB01_g701_t02 cel|CE_T04F8.7a pun|PgR010_g047_t02 tca|Tcan_12936.1
1295	1	1	1	1	asu|AgB01_g708_t06 cel|CE_Y110A7A.1a pun|PgR010_g051_t03 tca|Tcan_12947.1
1296	1	1	1	1	asu|AgB01_g709_t02 cel|CE_Y71G12B.24a pun|PgR010_g052_t01 tca|Tcan_02912.1
1297	1	1	1	1	asu|AgB01_g712_t04 cel|CE_C26B2.6 pun|PgR010_g055_t02 tca|Tcan_13574.1
1298	1	1	1	1	asu|AgB01_g714_t01 cel|CE_Y49F6B.1 pun|PgR010_g058_t02 tca|Tcan_13573.1
1299	1	1	1	1	asu|AgB01_g717_t02 cel|CE_K03E6.3 pun|PgR160_g007_t01 tca|Tcan_13580.1
1300	1	1	1	1	asu|AgB01_g722_t01 cel|CE_F55A4.7 pun|PgR160_g005_t01 tca|Tcan_13588.1
1301	1	1	1	1	asu|AgB01_g723_t03 cel|CE_F09F9.4 pun|PgR160_g004_t01 tca|Tcan_17631.1
1302	1	1	1	1	asu|AgB01_g728_t04 cel|CE_C25F6.2a pun|PgR019_g041_t02 tca|Tcan_17613.1
1303	1	1	1	1	asu|AgB01_g732_t01 cel|CE_F38E1.9 pun|PgR140_g012_t04 tca|Tcan_17632.1
1304	1	1	1	1	asu|AgB01_g739_t01 cel|CE_Y48B6A.6a pun|PgB03_g006_t01 tca|Tcan_06156.1
1305	1	1	1	1	asu|AgB01_g740_t02 cel|CE_DC2.3a pun|PgR026_g067_t01 tca|Tcan_05495.1
1306	1	1	1	1	asu|AgB01_g743_t01 cel|CE_D1007.5a pun|PgE351_g001_t02 tca|Tcan_09699.1
1307	1	1	1	1	asu|AgB01_g751_t02 cel|CE_C37A5.7 pun|PgR140_g004_t02 tca|Tcan_10355.1
1308	1	1	1	1	asu|AgB01_g753_t01 cel|CE_K03E6.5a pun|PgR140_g002_t01 tca|Tcan_15118.1
1309	1	1	1	1	asu|AgB01_g756_t01 cel|CE_K02G10.6 pun|PgR140_g001_t01 tca|Tcan_15100.1
1310	1	1	1	1	asu|AgB01_g758_t01 cel|CE_Y65B4BR.5a pun|PgR306_g003_t03 tca|Tcan_15106.1
1311	1	1	1	1	asu|AgB01_g759_t02 cel|CE_Y48G8AL.8 pun|PgR306_g002_t01 tca|Tcan_15102.1
1312	1	1	1	1	asu|AgB01_g762_t03 cel|CE_F10G8.3 pun|PgR010_g060_t03 tca|Tcan_13709.1
1313	1	1	1	1	asu|AgB01_g764_t02 cel|CE_Y71G12B.10 pun|PgR010_g061_t01 tca|Tcan_04005.1
1314	1	1	1	1	asu|AgB01_g765_t01 cel|CE_K10B3.10a pun|PgR010_g062_t03 tca|Tcan_13589.1
1315	1	1	1	1	asu|AgB01_g767_t06 cel|CE_C54G7.3a pun|PgR010_g063_t01 tca|Tcan_13585.1
1316	1	1	1	1	asu|AgB01_g772_t06 cel|CE_B0403.5 pun|PgR010_g067_t01 tca|Tcan_13577.1
1317	1	1	1	1	asu|AgB01_g777_t01 cel|CE_C44F1.3 pun|PgR010_g069_t01 tca|Tcan_14042.1
1318	1	1	1	1	asu|AgB01_g778_t03 cel|CE_F13D2.1a pun|PgR010_g070_t01 tca|Tcan_14037.1
1319	1	1	1	1	asu|AgB01_g784_t01 cel|CE_F54C9.5 pun|PgR054_g033_t02 tca|Tcan_14052.1
1320	1	1	1	1	asu|AgB01_g789_t01 cel|CE_C54H2.5 pun|PgR054_g031_t01 tca|Tcan_14041.1
1321	1	1	1	1	cel|CE_K08A8.1a asu|AgB15X_g056_t07 pun|PgB02X_g045_t03 tca|Tcan_15912.1
1322	1	1	1	1	asu|AgB01_g806_t03 cel|CE_F56A8.3a pun|PgR054_g022_t04 tca|Tcan_10328.1
1323	1	1	1	1	asu|AgB01_g816_t01 pun|PgR054_g011_t05 tca|Tcan_17626.1 cel|CE_F13B12.1
1324	1	1	1	1	asu|AgB01_g820_t01 cel|CE_K09E9.4 pun|PgR054_g004_t01 tca|Tcan_17628.1
1325	1	1	1	1	asu|AgB01_g822_t05 cel|CE_C06H2.3 pun|PgR054_g001_t03 tca|Tcan_17622.1
1326	1	1	1	1	asu|AgB01_g824_t01 cel|CE_T14F9.3 pun|PgB35_g004_t01 tca|Tcan_03603.1
1327	1	1	1	1	asu|AgB01_g827_t01 cel|CE_R173.1 pun|PgB35_g005_t02 tca|Tcan_03602.1
1328	1	1	1	1	asu|AgB02_g004_t01 tca|Tcan_04050.1 cel|CE_R05D11.8 pun|PgR088_g011_t02
1329	1	1	1	1	asu|AgB02_g009_t01 cel|CE_R03G5.2 pun|PgR100X_g029_t01 tca|Tcan_17334.1
1330	1	1	1	1	asu|AgB02_g024_t02 cel|CE_ZK721.4 pun|PgR005X_g226_t02 tca|Tcan_16602.1
1331	1	1	1	1	asu|AgB02_g025_t01 cel|CE_M02D8.1 pun|PgR005X_g227_t01 tca|Tcan_16616.1
1332	1	1	1	1	asu|AgB02_g026_t02 cel|CE_M02D8.5 pun|PgR005X_g228_t01 tca|Tcan_16619.1
1333	1	1	1	1	asu|AgB02_g029_t01 cel|CE_F13H10.4a pun|PgR183X_g002_t01 tca|Tcan_16617.1
1334	1	1	1	1	asu|AgB02_g031_t01 pun|PgR183X_g003_t01 tca|Tcan_11855.1 cel|CE_F39B1.1
1335	1	1	1	1	asu|AgB02_g033_t06 pun|PgR007_g087_t02 tca|Tcan_11856.1 cel|CE_T04F8.6
1336	1	1	1	1	asu|AgB02_g034_t01 cel|CE_Y41G9A.2 pun|PgR007_g086_t01 tca|Tcan_11854.1
1337	1	1	1	1	asu|AgB02_g035_t05 cel|CE_K11G12.5 pun|PgR007_g085_t01 tca|Tcan_02410.1
1338	1	1	1	1	asu|AgB02_g039_t03 cel|CE_K07E3.4a pun|PgR007_g082_t01 tca|Tcan_13651.1
1339	1	1	1	1	asu|AgB02_g040_t01 cel|CE_ZC449.1 pun|PgR007_g081_t01 tca|Tcan_13653.1
1340	1	1	1	1	asu|AgB02_g041_t01 cel|CE_C04F6.5 pun|PgR007_g080_t01 tca|Tcan_13635.1
1341	1	1	1	1	asu|AgB02_g042_t04 cel|CE_K10C8.1 pun|PgR007_g079_t03 tca|Tcan_13632.1
1342	1	1	1	1	asu|AgB02_g045_t01 pun|PgR007_g076_t03 tca|Tcan_07843.1 cel|CE_K02G10.5a
1343	1	1	1	1	asu|AgB02_g049_t02 cel|CE_C09B8.1 pun|PgR007_g069_t01 tca|Tcan_07675.1
1344	1	1	1	1	asu|AgB02_g059_t01 cel|CE_ZC13.3 pun|PgR007_g064_t03 tca|Tcan_07686.1
1345	1	1	1	1	asu|AgB02_g061_t01 cel|CE_F49E10.1 pun|PgR007_g063_t01 tca|Tcan_07678.1
1346	1	1	1	1	asu|AgB02_g066_t02 cel|CE_F42E11.2a pun|PgR007_g061_t02 tca|Tcan_06250.1
1347	1	1	1	1	asu|AgB02_g068_t08 cel|CE_AC7.2a pun|PgR007_g060_t02 tca|Tcan_07842.1
1348	1	1	1	1	asu|AgB02_g079_t04 cel|CE_H12D21.10a pun|PgR017X_g004_t01 tca|Tcan_07848.1
1349	1	1	1	1	asu|AgB02_g080_t02 cel|CE_H12D21.9 pun|PgR017X_g005_t01 tca|Tcan_07851.1
1350	1	1	1	1	asu|AgB02_g085_t01 cel|CE_Y11D7A.8 pun|PgR017X_g007_t01 tca|Tcan_05647.1
1351	1	1	1	1	asu|AgB02_g086_t05 cel|CE_T24F1.3a pun|PgR017X_g009_t02 tca|Tcan_05650.1
1352	1	1	1	1	asu|AgB02_g088_t01 cel|CE_ZC416.8a pun|PgR017X_g010_t01 tca|Tcan_05628.1
1353	1	1	1	1	asu|AgB02_g090_t01 cel|CE_Y105C5A.23 pun|PgR017X_g015_t01 tca|Tcan_05225.1
1354	1	1	1	1	asu|AgB02_g091_t09 cel|CE_Y57G11C.24a pun|PgR017X_g016_t04 tca|Tcan_02656.1
1355	1	1	1	1	asu|AgB02_g094_t05 pun|PgR017X_g017_t02 cel|CE_K08E4.3a tca|Tcan_02655.1
1356	1	1	1	1	asu|AgB02_g095_t01 cel|CE_C42C1.2 pun|PgR017X_g018_t01 tca|Tcan_02647.1
1357	1	1	1	1	asu|AgB02_g106_t01 cel|CE_C18H7.1a pun|PgR017X_g027_t02 tca|Tcan_03993.1
1358	1	1	1	1	asu|AgB02_g114_t07 pun|PgR017X_g044_t01 tca|Tcan_05438.1 cel|CE_ZC449.3a
1359	1	1	1	1	asu|AgB02_g116_t03 cel|CE_E01H11.3 pun|PgR017X_g046_t01 tca|Tcan_05432.1
1360	1	1	1	1	asu|AgB02_g118_t02 cel|CE_C02D4.2a pun|PgR017X_g049_t01 tca|Tcan_05431.1
1361	1	1	1	1	asu|AgB02_g122_t01 cel|CE_ZC8.6 pun|PgR017X_g058_t01 tca|Tcan_05363.1
1362	1	1	1	1	asu|AgB02_g125_t01 pun|PgR017X_g061_t01 tca|Tcan_02993.1 cel|CE_C07A12.1a
1363	1	1	1	1	asu|AgB02_g130_t01 cel|CE_C52B9.1a pun|PgR017X_g063_t01 tca|Tcan_02991.1
1364	1	1	1	1	asu|AgB02_g131_t06 cel|CE_B0261.4a pun|PgR017X_g064_t01 tca|Tcan_02990.1
1365	1	1	1	1	asu|AgB02_g136_t01 cel|CE_R07E4.4 pun|PgR017X_g070_t01 tca|Tcan_02998.1
1366	1	1	1	1	asu|AgB02_g140_t03 cel|CE_K08E4.6 pun|PgR017X_g072_t02 tca|Tcan_02983.1
1367	1	1	1	1	asu|AgB02_g143_t04 cel|CE_H01G02.2 pun|PgR017X_g073_t03 tca|Tcan_02996.1
1368	1	1	1	1	asu|AgB02_g149_t01 cel|CE_Y69A2AR.6 pun|PgR017X_g076_t01 tca|Tcan_12530.1
1369	1	1	1	1	asu|AgB02_g154_t01 cel|CE_F26H11.5 pun|PgR017X_g068_t01 tca|Tcan_17831.1
1370	1	1	1	1	asu|AgB02_g159_t01 cel|CE_ZK1321.2a pun|PgR017X_g086_t03 tca|Tcan_17806.1
1371	1	1	1	1	asu|AgB02_g160_t03 cel|CE_ZK1321.3 pun|PgR017X_g087_t02 tca|Tcan_17825.1
1372	1	1	1	1	asu|AgB02_g163_t01 cel|CE_C46F11.1a pun|PgR017X_g089_t01 tca|Tcan_17830.1
1373	1	1	1	1	asu|AgB02_g169_t01 cel|CE_Y46G5A.21 pun|PgR017X_g097_t03 tca|Tcan_07066.1
1374	1	1	1	1	asu|AgB02_g170_t02 cel|CE_F19D8.1a tca|Tcan_07052.1 pun|PgR017X_g098_t06
1375	1	1	1	1	asu|AgB02_g174_t01 cel|CE_F32A11.2 pun|PgR017X_g102_t03 tca|Tcan_11912.1
1376	1	1	1	1	asu|AgB02_g175_t06 cel|CE_F39C12.3a pun|PgR017X_g103_t01 tca|Tcan_05636.1
1377	1	1	1	1	asu|AgB02_g181_t04 cel|CE_F46F2.2a pun|PgR017X_g109_t03 tca|Tcan_03345.1
1378	1	1	1	1	asu|AgB02_g182_t06 cel|CE_C02D4.1 pun|PgR017X_g111_t01 tca|Tcan_03344.1
1379	1	1	1	1	asu|AgB02_g183_t05 cel|CE_C18A11.7a pun|PgR017X_g112_t01 tca|Tcan_03348.1
1380	1	1	1	1	asu|AgB02_g185_t03 cel|CE_F12D9.1a pun|PgR017X_g113_t01 tca|Tcan_03346.1
1381	1	1	1	1	asu|AgB02_g186_t09 cel|CE_K09C8.4 pun|PgR017X_g114_t01 tca|Tcan_03343.1
1382	1	1	1	1	asu|AgB02_g187_t01 cel|CE_B0478.1a pun|PgR017X_g115_t06 tca|Tcan_11092.1
1383	1	1	1	1	asu|AgB02_g188_t01 cel|CE_W03F8.9a pun|PgR017X_g116_t01 tca|Tcan_11094.1
1384	1	1	1	1	asu|AgB02_g193_t01 cel|CE_Y53H1B.2 pun|PgR017X_g120_t01 tca|Tcan_06852.1
1385	1	1	1	1	asu|AgB02_g194_t02 cel|CE_Y39H10A.3a pun|PgR017X_g121_t02 tca|Tcan_05227.1
1386	1	1	1	1	asu|AgB02_g196_t03 cel|CE_T20B5.3a pun|PgR017X_g122_t04 tca|Tcan_05228.1
1387	1	1	1	1	asu|AgB02_g199_t02 cel|CE_C02F4.2a pun|PgR017X_g124_t03 tca|Tcan_03347.1
1388	1	1	1	1	asu|AgB02_g207_t01 cel|CE_Y37E11AL.7a pun|PgR007_g004_t02 tca|Tcan_05262.1
1389	1	1	1	1	asu|AgB02_g210_t01 cel|CE_F13C5.6a pun|PgR007_g007_t01 tca|Tcan_05283.1
1390	1	1	1	1	asu|AgB02_g214_t01 cel|CE_F11A10.1a pun|PgR007_g009_t06 tca|Tcan_05294.1
1391	1	1	1	1	asu|AgB02_g217_t03 cel|CE_C41G11.1a pun|PgR007_g010_t01 tca|Tcan_05296.1
1392	1	1	1	1	asu|AgB02_g219_t01 cel|CE_C01B12.4 pun|PgR007_g012_t01 tca|Tcan_05297.1
1393	1	1	1	1	asu|AgB02_g220_t01 cel|CE_C01B12.3 pun|PgR007_g013_t01 tca|Tcan_05287.1
1394	1	1	1	1	asu|AgB02_g230_t02 cel|CE_T01G9.3 pun|PgR007_g019_t01 tca|Tcan_05273.1
1395	1	1	1	1	asu|AgB02_g236_t01 cel|CE_C06G3.8a pun|PgR007_g023_t02 tca|Tcan_06254.1
1396	1	1	1	1	asu|AgB02_g248_t02 cel|CE_C32D5.5 pun|PgR007_g031_t03 tca|Tcan_05291.1
1397	1	1	1	1	asu|AgB02_g249_t11 cel|CE_Y2H9A.1 pun|PgR007_g033_t01 tca|Tcan_05640.1
1398	1	1	1	1	asu|AgB02_g250_t02 cel|CE_K01C8.6 pun|PgR007_g034_t01 tca|Tcan_17817.1
1399	1	1	1	1	asu|AgB02_g253_t01 cel|CE_Y17G7B.18a pun|PgR007_g040_t01 tca|Tcan_17810.1
1400	1	1	1	1	asu|AgB02_g254_t04 cel|CE_ZK546.5 pun|PgR007_g041_t03 tca|Tcan_17826.1
1401	1	1	1	1	asu|AgB02_g255_t01 cel|CE_R12C12.9a pun|PgR007_g042_t01 tca|Tcan_17827.1
1402	1	1	1	1	asu|AgB02_g257_t02 cel|CE_ZK673.11a pun|PgR007_g043_t01 tca|Tcan_17821.1
1403	1	1	1	1	asu|AgB02_g258_t04 cel|CE_R05H10.6 pun|PgR007_g044_t01 tca|Tcan_17808.1
1404	1	1	1	1	asu|AgB02_g261_t01 cel|CE_C23H3.1a pun|PgR007_g045_t01 tca|Tcan_17343.1
1405	1	1	1	1	asu|AgB02_g264_t05 cel|CE_K10B4.3 pun|PgR007_g049_t01 tca|Tcan_17813.1
1406	1	1	1	1	asu|AgB02_g265_t05 pun|PgR007_g050_t03 tca|Tcan_06248.1 cel|CE_Y51H1A.2a
1407	1	1	1	1	asu|AgB02_g269_t02 cel|CE_F56D12.6a pun|PgR007_g053_t05 tca|Tcan_06247.1
1408	1	1	1	1	asu|AgB02_g273_t02 cel|CE_Y57G11C.32 pun|PgR007_g055_t01 tca|Tcan_05652.1
1409	1	1	1	1	asu|AgB02_g276_t02 cel|CE_Y38F1A.10a pun|PgR007_g058_t03 tca|Tcan_05631.1
1410	1	1	1	1	asu|AgB02_g291_t01 cel|CE_F52E1.9 pun|PgR069_g048_t01 tca|Tcan_10903.1
1411	1	1	1	1	asu|AgB02_g293_t02 cel|CE_F23H12.2 pun|PgR029_g002_t01 tca|Tcan_10904.1
1412	1	1	1	1	asu|AgB02_g296_t01 cel|CE_D1014.1 pun|PgR161_g003_t02 tca|Tcan_10905.1
1413	1	1	1	1	asu|AgB02_g301_t06 cel|CE_F09G2.2 pun|PgR161_g006_t04 tca|Tcan_15527.1
1414	1	1	1	1	asu|AgB02_g306_t01 cel|CE_K01D12.4a pun|PgR016_g070_t01 tca|Tcan_15515.1
1415	1	1	1	1	asu|AgB02_g307_t01 cel|CE_F43D2.1 pun|PgR016_g071_t01 tca|Tcan_15528.1
1416	1	1	1	1	asu|AgB02_g308_t02 cel|CE_C11D2.7 pun|PgR016_g072_t01 tca|Tcan_06130.1
1417	1	1	1	1	asu|AgB02_g309_t02 cel|CE_R11D1.1a pun|PgR016_g073_t02 tca|Tcan_15525.1
1418	1	1	1	1	asu|AgB02_g316_t01 cel|CE_Y42A5A.4a pun|PgR012_g002_t01 tca|Tcan_15519.1
1419	1	1	1	1	asu|AgB02_g317_t01 cel|CE_Y39B6A.2a pun|PgR012_g006_t02 tca|Tcan_12628.1
1420	1	1	1	1	asu|AgB02_g318_t01 cel|CE_M03F8.4 pun|PgR012_g005_t04 tca|Tcan_12621.1
1421	1	1	1	1	asu|AgB02_g319_t02 pun|PgR012_g007_t04 tca|Tcan_12625.1 cel|CE_K07A1.3
1422	1	1	1	1	asu|AgB02_g329_t01 cel|CE_F57B10.9 pun|PgB32_g001_t03 tca|Tcan_12615.1
1423	1	1	1	1	asu|AgB02_g335_t03 cel|CE_F56E10.2a pun|PgR060_g051_t01 tca|Tcan_12619.1
1424	1	1	1	1	asu|AgB02_g336_t02 cel|CE_Y71F9AL.18a pun|PgR060_g050_t01 tca|Tcan_12624.1
1425	1	1	1	1	asu|AgB02_g340_t03 cel|CE_C13G3.2 pun|PgR033_g004_t02 tca|Tcan_04974.1
1426	1	1	1	1	asu|AgB02_g341_t01 cel|CE_K11C4.4 pun|PgR033_g005_t01 tca|Tcan_18650.1
1427	1	1	1	1	asu|AgB02_g342_t03 cel|CE_Y46H3A.7a pun|PgR033_g007_t02 tca|Tcan_18654.1
1428	1	1	1	1	asu|AgB02_g343_t03 cel|CE_C10F3.1 pun|PgR033_g009_t03 tca|Tcan_11515.1
1429	1	1	1	1	asu|AgB02_g349_t02 pun|PgR033_g015_t01 tca|Tcan_06594.1 cel|CE_R31.2a
1430	1	1	1	1	asu|AgB02_g351_t02 cel|CE_Y40B10A.9a pun|PgR033_g016_t01 tca|Tcan_06598.1
1431	1	1	1	1	asu|AgB02_g352_t01 cel|CE_Y40B10A.1a pun|PgR033_g017_t01 tca|Tcan_06596.1
1432	1	1	1	1	asu|AgB02_g360_t05 cel|CE_C01G10.10a pun|PgR033_g028_t02 tca|Tcan_15705.1
1433	1	1	1	1	asu|AgB02_g362_t01 cel|CE_T10G3.3 pun|PgR033_g030_t01 tca|Tcan_15699.1
1434	1	1	1	1	asu|AgB02_g365_t06 cel|CE_F09G2.8a pun|PgR033_g032_t02 tca|Tcan_03300.1
1435	1	1	1	1	asu|AgB02_g367_t01 cel|CE_C10B5.1 pun|PgR033_g034_t01 tca|Tcan_16443.1
1436	1	1	1	1	asu|AgB02_g368_t04 cel|CE_R186.7 pun|PgR033_g035_t01 tca|Tcan_16442.1
1437	1	1	1	1	asu|AgB02_g378_t03 cel|CE_F32D8.13a pun|PgR033_g040_t01 tca|Tcan_16441.1
1438	1	1	1	1	asu|AgB02_g381_t01 cel|CE_Y80D3A.10 pun|PgR033_g043_t01 tca|Tcan_16445.1
1439	1	1	1	1	asu|AgB02_g382_t05 cel|CE_Y80D3A.2a pun|PgR033_g044_t01 tca|Tcan_16452.1
1440	1	1	1	1	asu|AgB02_g384_t01 cel|CE_Y47A7.1 pun|PgR033_g046_t02 tca|Tcan_16444.1
1441	1	1	1	1	asu|AgB02_g388_t01 cel|CE_F41E6.6 pun|PgR033_g049_t01 tca|Tcan_07248.1
1442	1	1	1	1	asu|AgB02_g397_t01 pun|PgR033_g053_t01 tca|Tcan_07238.1 cel|CE_T07H8.4a
1443	1	1	1	1	asu|AgB02_g400_t03 cel|CE_R01B10.4 pun|PgR033_g055_t01 tca|Tcan_07228.1
1444	1	1	1	1	asu|AgB02_g401_t03 pun|PgR033_g057_t02 tca|Tcan_07247.1 cel|CE_R01B10.6
1445	1	1	1	1	asu|AgB02_g409_t03 cel|CE_F07E5.5 pun|PgR033_g062_t05 tca|Tcan_15512.1
1446	1	1	1	1	asu|AgB02_g410_t01 cel|CE_C47E8.6 pun|PgR033_g064_t01 tca|Tcan_14033.1
1447	1	1	1	1	asu|AgB02_g411_t01 cel|CE_F26F2.7 pun|PgR033_g066_t07 tca|Tcan_14029.1
1448	1	1	1	1	asu|AgB02_g413_t02 cel|CE_F36H9.7 pun|PgR033_g069_t01 tca|Tcan_14022.1
1449	1	1	1	1	asu|AgB02_g417_t01 cel|CE_F25D1.1a pun|PgR033_g073_t01 tca|Tcan_10685.1
1450	1	1	1	1	asu|AgB02_g421_t01 cel|CE_F58H1.7a pun|PgR033_g077_t01 tca|Tcan_14993.1
1451	1	1	1	1	asu|AgB02_g423_t01 cel|CE_Y113G7A.5 pun|PgR033_g078_t02 tca|Tcan_14994.1
1452	1	1	1	1	asu|AgB02_g424_t03 cel|CE_Y60A3A.21a pun|PgR033_g079_t01 tca|Tcan_01068.1
1453	1	1	1	1	asu|AgB02_g426_t04 cel|CE_F36H1.2a pun|PgR033_g080_t02 tca|Tcan_07256.1
1454	1	1	1	1	asu|AgB02_g430_t01 cel|CE_T22H9.4 pun|PgR033_g082_t01 tca|Tcan_04359.1
1455	1	1	1	1	asu|AgB02_g441_t01 cel|CE_F35F11.1 pun|PgR285_g002_t02 tca|Tcan_07258.1
1456	1	1	1	1	asu|AgB02_g443_t04 cel|CE_Y39B6A.39a pun|PgR110_g002_t01 tca|Tcan_14996.1
1457	1	1	1	1	asu|AgB02_g445_t07 cel|CE_F26B1.2a pun|PgR110_g005_t01 tca|Tcan_07250.1
1458	1	1	1	1	asu|AgB02_g447_t01 cel|CE_Y50E8A.5 pun|PgR110_g006_t01 tca|Tcan_07252.1
1459	1	1	1	1	asu|AgB02_g455_t05 cel|CE_T18H9.7a pun|PgR110_g011_t03 tca|Tcan_06445.1
1460	1	1	1	1	asu|AgB02_g463_t02 cel|CE_K11G9.4 pun|PgR110_g018_t01 tca|Tcan_06442.1
1461	1	1	1	1	asu|AgB02_g466_t02 cel|CE_F53B7.3 pun|PgR110_g015_t01 tca|Tcan_06440.1
1462	1	1	1	1	asu|AgB02_g468_t03 cel|CE_K07A1.12 pun|PgR110_g014_t01 tca|Tcan_06453.1
1463	1	1	1	1	asu|AgB02_g469_t03 cel|CE_C35A5.9 pun|PgR110_g013_t02 tca|Tcan_06456.1
1464	1	1	1	1	asu|AgB02_g507_t02 cel|CE_ZK675.2 pun|PgB21_g022_t01 tca|Tcan_03188.1
1465	1	1	1	1	asu|AgB02_g508_t01 cel|CE_K10D2.6 pun|PgB21_g021_t04 tca|Tcan_03191.1
1466	1	1	1	1	asu|AgB02_g512_t01 cel|CE_F09F7.1 pun|PgB21_g017_t01 tca|Tcan_06958.1
1467	1	1	1	1	asu|AgB02_g513_t08 cel|CE_T22A3.6 pun|PgB21_g016_t04 tca|Tcan_06961.1
1468	1	1	1	1	asu|AgB02_g514_t01 cel|CE_T24A11.3 pun|PgB21_g015_t01 tca|Tcan_06965.1
1469	1	1	1	1	asu|AgB02_g516_t02 cel|CE_Y39E4B.7 pun|PgB21_g013_t01 tca|Tcan_06956.1
1470	1	1	1	1	asu|AgB02_g520_t02 cel|CE_C24D10.6 pun|PgR032X_g014_t01 tca|Tcan_15674.1
1471	1	1	1	1	asu|AgB02_g521_t02 cel|CE_F40A3.5 pun|PgR032X_g013_t02 tca|Tcan_10850.1
1472	1	1	1	1	asu|AgB02_g522_t01 cel|CE_R13F6.5 pun|PgR032X_g012_t01 tca|Tcan_10848.1
1473	1	1	1	1	asu|AgB02_g528_t02 cel|CE_Y38C1AA.2 pun|PgR032X_g007_t01 tca|Tcan_17772.1
1474	1	1	1	1	asu|AgB02_g529_t03 cel|CE_ZK353.8 pun|PgR032X_g006_t01 tca|Tcan_17771.1
1475	1	1	1	1	asu|AgB02_g530_t09 cel|CE_ZK1098.10a pun|PgR032X_g005_t03 tca|Tcan_13880.1
1476	1	1	1	1	asu|AgB02_g538_t01 cel|CE_ZK1098.1a pun|PgR040_g004_t01 tca|Tcan_17768.1
1477	1	1	1	1	asu|AgB03_g010_t05 cel|CE_D2023.6 pun|PgR303_g002_t04 tca|Tcan_10890.1
1478	1	1	1	1	asu|AgB03_g013_t02 cel|CE_T21C9.2a pun|PgR046_g055_t02 tca|Tcan_04527.1
1479	1	1	1	1	asu|AgB03_g016_t02 cel|CE_H10D18.5a pun|PgR046_g058_t01 tca|Tcan_04525.1
1480	1	1	1	1	asu|AgB03_g018_t01 cel|CE_C03D6.3a pun|PgR046_g061_t03 tca|Tcan_02781.1
1481	1	1	1	1	asu|AgB03_g019_t02 cel|CE_Y39B6A.48a pun|PgR046_g060_t01 tca|Tcan_02783.1
1482	1	1	1	1	asu|AgB03_g026_t02 cel|CE_R186.6 tca|Tcan_17897.1 pun|PgR046_g065_t03
1483	1	1	1	1	asu|AgB03_g038_t01 cel|CE_R09B3.1a pun|PgR028_g113_t01 tca|Tcan_15501.1
1484	1	1	1	1	asu|AgB03_g046_t01 cel|CE_K07C11.8 pun|PgR028_g119_t03 tca|Tcan_05119.1
1485	1	1	1	1	asu|AgB03_g047_t04 cel|CE_T27C4.1 pun|PgR028_g121_t01 tca|Tcan_05117.1
1486	1	1	1	1	asu|AgB03_g049_t01 cel|CE_T03D8.2 pun|PgR028_g124_t01 tca|Tcan_05113.1
1487	1	1	1	1	asu|AgB03_g052_t01 pun|PgR028_g126_t02 tca|Tcan_05122.1 cel|CE_ZK856.9
1488	1	1	1	1	asu|AgB03_g053_t02 cel|CE_ZC412.3a pun|PgR028_g127_t01 tca|Tcan_05120.1
1489	1	1	1	1	asu|AgB03_g057_t01 cel|CE_F58E6.1 pun|PgR151_g003_t01 tca|Tcan_14027.1
1490	1	1	1	1	asu|AgB03_g060_t03 cel|CE_W01A11.6 pun|PgR151_g004_t04 tca|Tcan_14021.1
1491	1	1	1	1	asu|AgB03_g065_t03 cel|CE_R09E12.3 pun|PgR022X_g104_t01 tca|Tcan_06349.1
1492	1	1	1	1	asu|AgB03_g066_t05 tca|Tcan_06389.1 cel|CE_F39G3.8 pun|PgR244X_g004_t01
1493	1	1	1	1	asu|AgB03_g067_t03 cel|CE_F39G3.7 pun|PgR151_g009_t01 tca|Tcan_06370.1
1494	1	1	1	1	asu|AgB03_g070_t02 cel|CE_T13H5.2a pun|PgB06_g088_t01 tca|Tcan_10381.1
1495	1	1	1	1	asu|AgB03_g071_t01 cel|CE_C29H12.3a pun|PgB06_g087_t01 tca|Tcan_10382.1
1496	1	1	1	1	asu|AgB03_g078_t01 cel|CE_F58G1.5 pun|PgR055_g009_t02 tca|Tcan_10373.1
1497	1	1	1	1	asu|AgB03_g082_t05 cel|CE_F18A1.6a pun|PgB06_g078_t03 tca|Tcan_10383.1
1498	1	1	1	1	asu|AgB03_g083_t01 cel|CE_Y54G11A.8a pun|PgB06_g077_t02 tca|Tcan_10375.1
1499	1	1	1	1	asu|AgB03_g084_t01 cel|CE_F35C11.4 pun|PgB06_g076_t03 tca|Tcan_10367.1
1500	1	1	1	1	asu|AgB03_g085_t03 cel|CE_Y54G11A.17 pun|PgB06_g075_t01 tca|Tcan_10370.1
1501	1	1	1	1	asu|AgB03_g089_t01 pun|PgB06_g070_t01 tca|Tcan_05246.1 cel|CE_F44G4.7
1502	1	1	1	1	asu|AgB03_g090_t01 cel|CE_F32A11.1 pun|PgB06_g068_t01 tca|Tcan_05245.1
1503	1	1	1	1	asu|AgB03_g091_t01 cel|CE_T06D8.8 pun|PgB06_g066_t02 tca|Tcan_05555.1
1504	1	1	1	1	asu|AgB03_g096_t02 pun|PgB06_g063_t01 tca|Tcan_05564.1 cel|CE_C43E11.2a
1505	1	1	1	1	asu|AgB03_g099_t03 cel|CE_C18A3.4a pun|PgB06_g060_t02 tca|Tcan_13207.1
1506	1	1	1	1	asu|AgB03_g100_t01 cel|CE_Y54E2A.10 pun|PgB06_g059_t01 tca|Tcan_11773.1
1507	1	1	1	1	asu|AgB03_g103_t04 cel|CE_M106.8 pun|PgB06_g057_t02 tca|Tcan_13206.1
1508	1	1	1	1	asu|AgB03_g104_t03 cel|CE_ZK177.6 pun|PgR340X_g001_t01 tca|Tcan_13208.1
1509	1	1	1	1	asu|AgB03_g106_t04 cel|CE_VM106R.1 pun|PgB06_g055_t01 tca|Tcan_13214.1
1510	1	1	1	1	asu|AgB03_g108_t02 cel|CE_K07F5.12 pun|PgB06_g053_t01 tca|Tcan_14836.1
1511	1	1	1	1	asu|AgB03_g112_t01 cel|CE_R06B9.6 pun|PgB06_g051_t01 tca|Tcan_14848.1
1512	1	1	1	1	asu|AgB03_g118_t03 cel|CE_T07A9.12a pun|PgB06_g046_t01 tca|Tcan_14859.1
1513	1	1	1	1	asu|AgB03_g119_t05 cel|CE_F23C8.5a pun|PgB06_g045_t01 tca|Tcan_14855.1
1514	1	1	1	1	asu|AgB03_g124_t01 cel|CE_W09G10.4a pun|PgB06_g042_t02 tca|Tcan_14824.1
1515	1	1	1	1	asu|AgB03_g125_t01 cel|CE_T03F6.1 pun|PgB06_g034_t01 tca|Tcan_14837.1
1516	1	1	1	1	asu|AgB03_g126_t01 cel|CE_B0334.6 pun|PgB06_g033_t01 tca|Tcan_14842.1
1517	1	1	1	1	asu|AgB03_g128_t01 cel|CE_C27H5.8 pun|PgB06_g029_t01 tca|Tcan_14831.1
1518	1	1	1	1	asu|AgB03_g129_t01 cel|CE_E04F6.2 pun|PgB06_g028_t01 tca|Tcan_14835.1
1519	1	1	1	1	asu|AgB03_g134_t02 cel|CE_F22D3.6 pun|PgB06_g024_t02 tca|Tcan_14829.1
1520	1	1	1	1	asu|AgB03_g137_t02 cel|CE_Y43H11AL.2a pun|PgB06_g021_t01 tca|Tcan_14825.1
1521	1	1	1	1	asu|AgB03_g139_t01 cel|CE_F13D12.4a pun|PgB06_g020_t02 tca|Tcan_14858.1
1522	1	1	1	1	asu|AgB03_g140_t03 cel|CE_C30B5.9 pun|PgB06_g019_t01 tca|Tcan_14834.1
1523	1	1	1	1	asu|AgB03_g141_t01 cel|CE_Y55F3BR.4a pun|PgB06_g018_t01 tca|Tcan_14843.1
1524	1	1	1	1	asu|AgB03_g148_t03 pun|PgB06_g012_t01 tca|Tcan_14832.1 cel|CE_R166.1a
1525	1	1	1	1	asu|AgB03_g151_t01 cel|CE_Y54G11B.1 pun|PgB06_g011_t01 tca|Tcan_14853.1
1526	1	1	1	1	asu|AgB03_g157_t01 cel|CE_ZK20.3 pun|PgR022X_g011_t01 tca|Tcan_07137.1
1527	1	1	1	1	asu|AgB03_g160_t01 cel|CE_C01G6.1a pun|PgR022X_g008_t01 tca|Tcan_07141.1
1528	1	1	1	1	asu|AgB03_g162_t02 cel|CE_F23F12.6 pun|PgR022X_g005_t02 tca|Tcan_07136.1
1529	1	1	1	1	asu|AgB03_g168_t03 cel|CE_F28C6.3 pun|PgR019_g035_t01 tca|Tcan_02792.1
1530	1	1	1	1	asu|AgB03_g170_t04 cel|CE_C08B11.3 pun|PgR019_g031_t02 tca|Tcan_04410.1
1531	1	1	1	1	asu|AgB03_g172_t06 cel|CE_R03D7.1 pun|PgR019_g030_t01 tca|Tcan_04411.1
1532	1	1	1	1	asu|AgB03_g176_t03 cel|CE_D1069.4a pun|PgR019_g026_t01 tca|Tcan_05897.1
1533	1	1	1	1	asu|AgB03_g177_t19 cel|CE_K08F8.6 pun|PgR182_g001_t06 tca|Tcan_05874.1
1534	1	1	1	1	asu|AgB03_g178_t01 cel|CE_T19H5.4a pun|PgR025_g099_t01 tca|Tcan_02790.1
1535	1	1	1	1	asu|AgB03_g192_t02 cel|CE_Y55F3BR.8a pun|PgR025_g105_t01 tca|Tcan_05560.1
1536	1	1	1	1	asu|AgB03_g195_t06 cel|CE_F33H1.1a pun|PgR025_g110_t01 tca|Tcan_05563.1
1537	1	1	1	1	asu|AgB03_g198_t02 cel|CE_T24H7.1 pun|PgR239_g003_t01 tca|Tcan_05557.1
1538	1	1	1	1	asu|AgB03_g200_t04 cel|CE_K09E4.3a pun|PgR022X_g047_t01 tca|Tcan_05256.1
1539	1	1	1	1	asu|AgB03_g208_t02 cel|CE_C56C10.4 pun|PgR022X_g038_t01 tca|Tcan_15765.1
1540	1	1	1	1	asu|AgB03_g209_t04 cel|CE_ZK20.1 pun|PgR022X_g037_t07 tca|Tcan_15761.1
1541	1	1	1	1	asu|AgB03_g226_t01 cel|CE_F17C11.8 pun|PgR275_g002_t04 tca|Tcan_15423.1
1542	1	1	1	1	asu|AgB03_g232_t01 cel|CE_Y54F10AM.6 pun|PgR052_g005_t01 tca|Tcan_12433.1
1543	1	1	1	1	asu|AgB03_g246_t01 cel|CE_R151.5a pun|PgR052_g017_t03 tca|Tcan_15415.1
1544	1	1	1	1	asu|AgB03_g247_t01 cel|CE_Y71H2B.6 pun|PgR052_g019_t01 tca|Tcan_15416.1
1545	1	1	1	1	asu|AgB03_g249_t02 cel|CE_Y71H2B.5 pun|PgR118_g033_t01 tca|Tcan_15420.1
1546	1	1	1	1	asu|AgB03_g251_t01 cel|CE_ZK353.1a pun|PgR118_g029_t04 tca|Tcan_15409.1
1547	1	1	1	1	asu|AgB03_g252_t02 cel|CE_ZK353.9 pun|PgR118_g028_t02 tca|Tcan_15408.1
1548	1	1	1	1	asu|AgB03_g255_t01 cel|CE_F26F4.10a pun|PgR118_g024_t01 tca|Tcan_13865.1
1549	1	1	1	1	asu|AgB03_g256_t02 cel|CE_F26F4.11 pun|PgR118_g023_t01 tca|Tcan_13874.1
1550	1	1	1	1	asu|AgB03_g260_t01 cel|CE_T23G5.5 pun|PgR118_g019_t01 tca|Tcan_13862.1
1551	1	1	1	1	asu|AgB03_g270_t03 cel|CE_Y17G7B.15a pun|PgR136_g009_t02 tca|Tcan_08002.1
1552	1	1	1	1	asu|AgB03_g276_t01 cel|CE_F42C5.9 pun|PgR055_g046_t02 tca|Tcan_13416.1
1553	1	1	1	1	asu|AgB03_g284_t01 cel|CE_F25H2.9 pun|PgR055_g040_t01 tca|Tcan_04100.1
1554	1	1	1	1	asu|AgB03_g293_t02 cel|CE_F48E8.7a pun|PgR055_g033_t01 tca|Tcan_06744.1
1555	1	1	1	1	asu|AgB03_g294_t06 cel|CE_M01B12.5a pun|PgR055_g032_t01 tca|Tcan_18761.1
1556	1	1	1	1	asu|AgB03_g296_t02 cel|CE_C55F2.1a pun|PgR055_g028_t02 tca|Tcan_18772.1
1557	1	1	1	1	asu|AgB03_g298_t04 cel|CE_Y54G2A.17a pun|PgR055_g027_t06 tca|Tcan_18753.1
1558	1	1	1	1	asu|AgB03_g301_t01 pun|PgR055_g025_t01 cel|CE_C07G1.4a tca|Tcan_18758.1
1559	1	1	1	1	asu|AgB03_g304_t19 cel|CE_C07G1.5 pun|PgR055_g024_t02 tca|Tcan_18774.1
1560	1	1	1	1	asu|AgB03_g306_t06 cel|CE_Y67D8A.2a pun|PgR055_g021_t04 tca|Tcan_18784.1
1561	1	1	1	1	asu|AgB03_g323_t03 pun|PgR055_g008_t01 tca|Tcan_02887.1 cel|CE_R02F11.4
1562	1	1	1	1	asu|AgB03_g324_t06 cel|CE_K08B12.2a pun|PgR055_g007_t02 tca|Tcan_02867.1
1563	1	1	1	1	asu|AgB03_g330_t01 cel|CE_R08C7.2a pun|PgR055_g002_t02 tca|Tcan_02855.1
1564	1	1	1	1	asu|AgB03_g333_t01 cel|CE_F38A5.1a pun|PgR020_g151_t02 tca|Tcan_02890.1
1565	1	1	1	1	asu|AgB03_g354_t01 cel|CE_R06B10.5 pun|PgR078_g035_t02 tca|Tcan_16871.1
1566	1	1	1	1	cel|CE_F48E8.4 asu|AgB03_g362_t01 pun|PgR078_g031_t01 tca|Tcan_12481.1
1567	1	1	1	1	asu|AgB03_g368_t01 cel|CE_Y53G8B.4a pun|PgR078_g026_t05 tca|Tcan_15210.1
1568	1	1	1	1	asu|AgB03_g370_t02 cel|CE_T19C3.4 pun|PgR078_g024_t01 tca|Tcan_15203.1
1569	1	1	1	1	asu|AgB03_g376_t02 cel|CE_K03H1.13a pun|PgR078_g021_t01 tca|Tcan_15207.1
1570	1	1	1	1	asu|AgB03_g377_t01 cel|CE_Y56A3A.31a pun|PgR078_g019_t02 tca|Tcan_15202.1
1571	1	1	1	1	asu|AgB03_g380_t02 cel|CE_W09G3.7a pun|PgR078_g018_t01 tca|Tcan_15206.1
1572	1	1	1	1	asu|AgB03_g384_t02 pun|PgR078_g017_t03 cel|CE_C07H6.1 tca|Tcan_03660.1
1573	1	1	1	1	asu|AgB03_g390_t01 pun|PgR078_g010_t01 tca|Tcan_06802.1 cel|CE_R13A5.5
1574	1	1	1	1	asu|AgB03_g399_t09 cel|CE_T16H12.4 pun|PgR010_g073_t05 tca|Tcan_12491.1
1575	1	1	1	1	asu|AgB03_g400_t11 cel|CE_F01F1.8a pun|PgR010_g075_t02 tca|Tcan_17225.1
1576	1	1	1	1	asu|AgB03_g420_t01 cel|CE_M03A8.1 pun|PgR010_g086_t01 tca|Tcan_12495.1
1577	1	1	1	1	asu|AgB03_g431_t02 pun|PgR010_g093_t01 tca|Tcan_12290.1 cel|CE_ZK632.11
1578	1	1	1	1	asu|AgB03_g432_t02 cel|CE_R05D3.11 pun|PgR010_g094_t03 tca|Tcan_12284.1
1579	1	1	1	1	asu|AgB03_g450_t05 cel|CE_C25G4.3a pun|PgR010_g104_t01 tca|Tcan_12186.1
1580	1	1	1	1	asu|AgB03_g453_t01 pun|PgR010_g102_t02 tca|Tcan_12140.1 cel|CE_T03F6.4
1581	1	1	1	1	asu|AgB03_g457_t02 cel|CE_C27B7.7a pun|PgB21_g029_t02 tca|Tcan_12702.1
1582	1	1	1	1	asu|AgB03_g458_t02 cel|CE_R01H2.5 pun|PgB21_g030_t02 tca|Tcan_12707.1
1583	1	1	1	1	asu|AgB03_g459_t01 cel|CE_R01H2.6 pun|PgB21_g032_t03 tca|Tcan_12708.1
1584	1	1	1	1	asu|AgB03_g466_t02 cel|CE_Y47D3A.21 pun|PgB21_g039_t01 tca|Tcan_12700.1
1585	1	1	1	1	asu|AgB03_g470_t01 cel|CE_R151.9 pun|PgB26_g015_t01 tca|Tcan_18704.1
1586	1	1	1	1	asu|AgB03_g471_t06 cel|CE_ZK757.4a pun|PgB26_g014_t02 tca|Tcan_18686.1
1587	1	1	1	1	asu|AgB03_g472_t01 cel|CE_H10E21.5 pun|PgB26_g012_t03 tca|Tcan_18693.1
1588	1	1	1	1	asu|AgB03_g474_t09 cel|CE_ZK112.6 pun|PgB26_g007_t02 tca|Tcan_18697.1
1589	1	1	1	1	asu|AgB03_g475_t01 cel|CE_Y82E9BR.3 pun|PgB26_g008_t01 tca|Tcan_18700.1
1590	1	1	1	1	asu|AgB03_g484_t01 cel|CE_Y37D8A.9a pun|PgR137_g010_t01 tca|Tcan_18706.1
1591	1	1	1	1	asu|AgB03_g485_t05 cel|CE_F58G6.1 pun|PgR137_g012_t01 tca|Tcan_18702.1
1592	1	1	1	1	asu|AgB03_g487_t03 cel|CE_F54H12.6 pun|PgR137_g015_t01 tca|Tcan_18708.1
1593	1	1	1	1	asu|AgB03_g489_t01 cel|CE_ZK328.6 pun|PgR137_g005_t02 tca|Tcan_17191.1
1594	1	1	1	1	asu|AgB03_g498_t02 cel|CE_Y50D7A.6 pun|PgR164X_g002_t03 tca|Tcan_17203.1
1595	1	1	1	1	asu|AgB03_g499_t01 cel|CE_Y48G9A.8 pun|PgR164X_g003_t01 tca|Tcan_17192.1
1596	1	1	1	1	asu|AgB03_g500_t01 cel|CE_F42G9.7 pun|PgR236_g001_t01 tca|Tcan_17189.1
1597	1	1	1	1	asu|AgB03_g509_t01 cel|CE_Y70G10A.3 pun|PgR048_g003_t03 tca|Tcan_17186.1
1598	1	1	1	1	asu|AgB04_g011_t01 cel|CE_Y80D3A.5 pun|PgR006_g150_t01 tca|Tcan_11104.1
1599	1	1	1	1	asu|AgB04_g012_t01 cel|CE_F33H2.6 pun|PgR006_g149_t01 tca|Tcan_11107.1
1600	1	1	1	1	asu|AgB04_g014_t10 cel|CE_B0285.5 pun|PgB30_g005_t01 tca|Tcan_12254.1
1601	1	1	1	1	asu|AgB04_g015_t01 cel|CE_Y95B8A.12a pun|PgR062_g017_t02 tca|Tcan_07360.1
1602	1	1	1	1	asu|AgB04_g017_t04 cel|CE_C30F8.2 pun|PgR062_g015_t01 tca|Tcan_14079.1
1603	1	1	1	1	asu|AgB04_g018_t01 cel|CE_C30F8.4a pun|PgR062_g014_t01 tca|Tcan_14083.1
1604	1	1	1	1	asu|AgB04_g020_t01 cel|CE_T05C3.5 pun|PgR062_g010_t01 tca|Tcan_15551.1
1605	1	1	1	1	asu|AgB04_g025_t01 cel|CE_K11D2.1a pun|PgR094_g027_t01 tca|Tcan_15550.1
1606	1	1	1	1	asu|AgB04_g029_t05 cel|CE_F27D4.4a pun|PgR018_g065_t04 tca|Tcan_08494.1
1607	1	1	1	1	asu|AgB04_g038_t01 cel|CE_Y18H1A.4 pun|PgR018_g057_t01 tca|Tcan_13563.1
1608	1	1	1	1	asu|AgB04_g040_t01 cel|CE_B0207.2 pun|PgR160_g003_t03 tca|Tcan_13552.1
1609	1	1	1	1	asu|AgB04_g044_t04 cel|CE_C32F10.2 pun|PgR018_g055_t01 tca|Tcan_13560.1
1610	1	1	1	1	asu|AgB04_g049_t04 cel|CE_Y105E8A.3 pun|PgR018_g053_t01 tca|Tcan_15395.1
1611	1	1	1	1	asu|AgB04_g051_t08 pun|PgR018_g051_t01 tca|Tcan_17948.1 cel|CE_H04J21.3a
1612	1	1	1	1	asu|AgB04_g053_t06 cel|CE_F22D6.2 pun|PgR018_g050_t05 tca|Tcan_17946.1
1613	1	1	1	1	asu|AgB04_g054_t03 cel|CE_F30A10.6 pun|PgR082_g001_t01 tca|Tcan_17950.1
1614	1	1	1	1	asu|AgB04_g055_t07 cel|CE_D1007.16 pun|PgR082_g002_t01 tca|Tcan_17947.1
1615	1	1	1	1	asu|AgB04_g058_t02 cel|CE_C46H11.11a pun|PgR082_g009_t01 tca|Tcan_17945.1
1616	1	1	1	1	asu|AgB04_g060_t04 cel|CE_Y54E10A.15 pun|PgR082_g008_t01 tca|Tcan_05520.1
1617	1	1	1	1	asu|AgB04_g063_t01 cel|CE_Y18D10A.9 pun|PgR082_g006_t01 tca|Tcan_06345.1
1618	1	1	1	1	asu|AgB04_g073_t02 cel|CE_F33D11.5 pun|PgR097_g019_t01 tca|Tcan_12890.1
1619	1	1	1	1	asu|AgB04_g080_t01 cel|CE_H06O01.1 pun|PgR097_g022_t01 tca|Tcan_06548.1
1620	1	1	1	1	asu|AgB04_g081_t02 cel|CE_F15C11.2a pun|PgR097_g023_t02 tca|Tcan_06545.1
1621	1	1	1	1	asu|AgB04_g083_t01 cel|CE_F15C11.1 pun|PgR097_g024_t04 tca|Tcan_06552.1
1622	1	1	1	1	asu|AgB04_g087_t01 cel|CE_T27A3.6 pun|PgR097_g027_t02 tca|Tcan_14800.1
1623	1	1	1	1	asu|AgB04_g092_t06 cel|CE_F30F8.3 pun|PgR062_g066_t01 tca|Tcan_16433.1
1624	1	1	1	1	asu|AgB04_g099_t02 cel|CE_R07D5.2 pun|PgR004_g049_t03 tca|Tcan_02618.1
1625	1	1	1	1	asu|AgB04_g103_t02 cel|CE_T08B2.10 pun|PgR004_g053_t01 tca|Tcan_02616.1
1626	1	1	1	1	asu|AgB04_g106_t02 cel|CE_F53F10.3 pun|PgR004_g054_t01 tca|Tcan_02621.1
1627	1	1	1	1	asu|AgB04_g108_t01 cel|CE_F53F10.4 pun|PgR004_g056_t01 tca|Tcan_02617.1
1628	1	1	1	1	asu|AgB04_g111_t04 cel|CE_F32B5.6a pun|PgR004_g058_t01 tca|Tcan_02610.1
1629	1	1	1	1	asu|AgB04_g112_t02 cel|CE_F26E4.3 pun|PgR004_g060_t01 tca|Tcan_18965.1
1630	1	1	1	1	asu|AgB04_g113_t01 cel|CE_F39B2.8 pun|PgR004_g061_t02 tca|Tcan_18961.1
1631	1	1	1	1	asu|AgB04_g116_t03 cel|CE_C41D11.2 pun|PgR004_g065_t01 tca|Tcan_15278.1
1632	1	1	1	1	asu|AgB04_g117_t04 cel|CE_F16C3.1 pun|PgR004_g066_t01 tca|Tcan_15272.1
1633	1	1	1	1	asu|AgB04_g120_t03 cel|CE_F56H1.1 pun|PgR004_g069_t03 tca|Tcan_18963.1
1634	1	1	1	1	asu|AgB04_g122_t01 cel|CE_F39B2.11 pun|PgR004_g070_t02 tca|Tcan_18960.1
1635	1	1	1	1	asu|AgB04_g123_t01 cel|CE_K02B12.7 pun|PgR004_g071_t01 tca|Tcan_18962.1
1636	1	1	1	1	asu|AgB04_g130_t01 cel|CE_Y110A7A.3 pun|PgR004_g077_t01 tca|Tcan_16841.1
1637	1	1	1	1	asu|AgB04_g132_t01 cel|CE_Y105E8A.22 pun|PgR004_g080_t01 tca|Tcan_06333.1
1638	1	1	1	1	asu|AgB04_g138_t05 cel|CE_C26C6.2 pun|PgR004_g083_t01 tca|Tcan_07905.1
1639	1	1	1	1	asu|AgB04_g142_t04 cel|CE_B0205.11 pun|PgR004_g085_t02 tca|Tcan_17521.1
1640	1	1	1	1	asu|AgB04_g144_t02 cel|CE_C43E11.7 pun|PgR004_g087_t01 tca|Tcan_18966.1
1641	1	1	1	1	asu|AgB04_g151_t03 cel|CE_Y92H12A.5a pun|PgR004_g091_t02 tca|Tcan_13023.1
1642	1	1	1	1	asu|AgB04_g154_t05 cel|CE_Y48G10A.3 pun|PgR004_g095_t05 tca|Tcan_14555.1
1643	1	1	1	1	asu|AgB04_g161_t03 cel|CE_F37E3.2 pun|PgR004_g102_t03 tca|Tcan_02759.1
1644	1	1	1	1	asu|AgB04_g172_t01 cel|CE_F43G9.12a pun|PgR004_g109_t01 tca|Tcan_15543.1
1645	1	1	1	1	asu|AgB04_g181_t01 pun|PgR004_g113_t01 tca|Tcan_06336.1 cel|CE_F21C3.1a
1646	1	1	1	1	asu|AgB04_g194_t01 cel|CE_R12E2.13 pun|PgR004_g123_t01 tca|Tcan_18145.1
1647	1	1	1	1	asu|AgB04_g197_t02 cel|CE_D1007.7 pun|PgR004_g127_t05 tca|Tcan_18148.1
1648	1	1	1	1	asu|AgB04_g201_t14 cel|CE_F54H12.1a pun|PgR004_g129_t01 tca|Tcan_10837.1
1649	1	1	1	1	asu|AgB04_g204_t04 cel|CE_C36F7.4a pun|PgR004_g132_t01 tca|Tcan_13830.1
1650	1	1	1	1	asu|AgB04_g207_t01 cel|CE_F26E4.7a pun|PgR004_g136_t04 tca|Tcan_13832.1
1651	1	1	1	1	asu|AgB04_g209_t05 cel|CE_C08H9.3a pun|PgR004_g137_t07 tca|Tcan_13827.1
1652	1	1	1	1	asu|AgB04_g211_t01 cel|CE_T25G3.3 pun|PgR004_g139_t02 tca|Tcan_13835.1
1653	1	1	1	1	asu|AgB04_g214_t01 cel|CE_VF36H2L.1 pun|PgR004_g144_t01 tca|Tcan_17501.1
1654	1	1	1	1	asu|AgB04_g217_t02 cel|CE_D2092.3 tca|Tcan_17504.1 pun|PgR004_g146_t01
1655	1	1	1	1	asu|AgB04_g220_t02 cel|CE_F47G4.6 pun|PgR004_g150_t01 tca|Tcan_05223.1
1656	1	1	1	1	asu|AgB04_g226_t02 cel|CE_F56H1.6 pun|PgR263_g005_t01 tca|Tcan_08500.1
1657	1	1	1	1	asu|AgB04_g228_t04 cel|CE_Y74C10AR.3a pun|PgR004_g155_t01 tca|Tcan_08488.1
1658	1	1	1	1	asu|AgB04_g229_t03 cel|CE_Y74C10AL.2 pun|PgR004_g156_t01 tca|Tcan_02269.1
1659	1	1	1	1	asu|AgB04_g234_t01 cel|CE_F36H9.3 pun|PgR004_g162_t02 tca|Tcan_08492.1
1660	1	1	1	1	asu|AgB04_g247_t01 cel|CE_Y73E7A.3a pun|PgR004_g169_t01 tca|Tcan_13559.1
1661	1	1	1	1	asu|AgB04_g257_t02 cel|CE_F39B2.10 pun|PgR004_g181_t01 tca|Tcan_09591.1
1662	1	1	1	1	asu|AgB04_g259_t02 cel|CE_F43G9.1 pun|PgR004_g184_t01 tca|Tcan_09611.1
1663	1	1	1	1	asu|AgB04_g261_t03 cel|CE_Y48G1C.12 pun|PgR004_g185_t04 tca|Tcan_09594.1
1664	1	1	1	1	asu|AgB04_g290_t03 cel|CE_F27D4.7 pun|PgR004_g208_t01 tca|Tcan_08941.1
1665	1	1	1	1	asu|AgB04_g301_t01 cel|CE_Y51F10.3a pun|PgR004_g214_t01 tca|Tcan_08934.1
1666	1	1	1	1	asu|AgB04_g302_t02 cel|CE_R12E2.12 pun|PgR004_g215_t01 tca|Tcan_08942.1
1667	1	1	1	1	asu|AgB04_g305_t10 cel|CE_C26C6.1a pun|PgR004_g221_t01 tca|Tcan_08943.1
1668	1	1	1	1	asu|AgB04_g306_t05 cel|CE_T28F4.4 pun|PgR004_g226_t02 tca|Tcan_08931.1
1669	1	1	1	1	asu|AgB04_g315_t03 cel|CE_C36B1.12a pun|PgR004_g236_t01 tca|Tcan_16064.1
1670	1	1	1	1	asu|AgB04_g316_t01 cel|CE_F07F6.6 pun|PgR004_g237_t01 tca|Tcan_15757.1
1671	1	1	1	1	asu|AgB04_g317_t02 cel|CE_T24B8.1a pun|PgR004_g238_t01 tca|Tcan_15754.1
1672	1	1	1	1	asu|AgB04_g319_t04 cel|CE_B0511.7 pun|PgR004_g239_t01 tca|Tcan_15751.1
1673	1	1	1	1	asu|AgB04_g325_t01 cel|CE_M18.6a pun|PgR004_g245_t01 tca|Tcan_03214.1
1674	1	1	1	1	asu|AgB04_g335_t08 cel|CE_C33H5.9 pun|PgR088_g034_t01 tca|Tcan_03220.1
1675	1	1	1	1	asu|AgB04_g336_t03 cel|CE_T20F10.2a pun|PgR088_g033_t02 tca|Tcan_09891.1
1676	1	1	1	1	asu|AgB04_g354_t02 cel|CE_K02F2.3 pun|PgR088_g014_t01 tca|Tcan_04026.1
1677	1	1	1	1	asu|AgB04_g355_t01 cel|CE_K02F2.6 pun|PgR088_g015_t01 tca|Tcan_04038.1
1678	1	1	1	1	asu|AgB04_g356_t06 cel|CE_B0511.13a pun|PgR088_g013_t01 tca|Tcan_04034.1
1679	1	1	1	1	asu|AgB04_g363_t01 cel|CE_Y53H1B.1 pun|PgR088_g007_t01 tca|Tcan_07155.1
1680	1	1	1	1	asu|AgB04_g364_t03 cel|CE_Y87G2A.10a pun|PgR088_g006_t02 tca|Tcan_07161.1
1681	1	1	1	1	asu|AgB04_g365_t03 cel|CE_Y87G2A.11 pun|PgR088_g005_t02 tca|Tcan_07153.1
1682	1	1	1	1	asu|AgB04_g366_t04 tca|Tcan_07150.1 cel|CE_C30H6.2 pun|PgR088_g004_t01
1683	1	1	1	1	asu|AgB04_g367_t01 cel|CE_Y51A2D.18 pun|PgR088_g002_t02 tca|Tcan_07149.1
1684	1	1	1	1	asu|AgB04_g370_t03 cel|CE_T05H10.2 pun|PgR092_g030_t02 tca|Tcan_07160.1
1685	1	1	1	1	asu|AgB04_g379_t02 cel|CE_F55A12.8 pun|PgR007_g222_t01 tca|Tcan_07361.1
1686	1	1	1	1	asu|AgB04_g381_t02 cel|CE_K06A5.8a pun|PgR087_g002_t10 tca|Tcan_04049.1
1687	1	1	1	1	asu|AgB04_g384_t04 cel|CE_F39B2.3 tca|Tcan_04036.1 pun|PgR087_g004_t04
1688	1	1	1	1	asu|AgB04_g386_t04 cel|CE_C01A2.3 pun|PgR178_g004_t01 tca|Tcan_04037.1
1689	1	1	1	1	asu|AgB04_g397_t01 pun|PgR087_g009_t01 cel|CE_F12B6.3a tca|Tcan_14076.1
1690	1	1	1	1	asu|AgB04_g401_t06 cel|CE_F22G12.4a pun|PgR087_g012_t01 tca|Tcan_15750.1
1691	1	1	1	1	asu|AgB04_g403_t02 cel|CE_C56A3.5 pun|PgR087_g013_t02 tca|Tcan_14786.1
1692	1	1	1	1	asu|AgB04_g407_t12 cel|CE_Y71G12B.16 pun|PgR087_g017_t01 tca|Tcan_14791.1
1693	1	1	1	1	asu|AgB04_g409_t01 cel|CE_Y87G2A.8a pun|PgR087_g019_t01 tca|Tcan_14803.1
1694	1	1	1	1	asu|AgB04_g413_t02 cel|CE_C33F10.14 pun|PgR087_g025_t01 tca|Tcan_14787.1
1695	1	1	1	1	asu|AgB04_g415_t05 cel|CE_F26G1.1 pun|PgR087_g026_t01 tca|Tcan_14788.1
1696	1	1	1	1	asu|AgB04_g418_t01 cel|CE_F56H1.4 pun|PgR087_g031_t02 tca|Tcan_15281.1
1697	1	1	1	1	asu|AgB04_g419_t01 cel|CE_F43G9.3 pun|PgR087_g032_t02 tca|Tcan_15282.1
1698	1	1	1	1	asu|AgB04_g421_t03 cel|CE_ZK643.2 pun|PgR087_g034_t03 tca|Tcan_15271.1
1699	1	1	1	1	asu|AgB04_g422_t11 pun|PgR087_g036_t02 tca|Tcan_15287.1 cel|CE_ZC247.3
1700	1	1	1	1	asu|AgB04_g424_t01 cel|CE_C25A1.3 pun|PgR087_g038_t01 tca|Tcan_15284.1
1701	1	1	1	1	asu|AgB04_g428_t10 pun|PgR107_g023_t01 tca|Tcan_11464.1 cel|CE_Y54E10BR.8
1702	1	1	1	1	asu|AgB04_g429_t06 cel|CE_C53D6.7 pun|PgR107_g022_t04 tca|Tcan_03439.1
1703	1	1	1	1	asu|AgB04_g431_t01 cel|CE_Y52B11A.8 pun|PgR107_g018_t03 tca|Tcan_03242.1
1704	1	1	1	1	asu|AgB04_g432_t02 cel|CE_W09C5.5 pun|PgR107_g017_t04 tca|Tcan_03226.1
1705	1	1	1	1	asu|AgB04_g433_t01 cel|CE_ZK265.8a pun|PgR107_g016_t01 tca|Tcan_03227.1
1706	1	1	1	1	asu|AgB04_g437_t03 cel|CE_R02D3.4a pun|PgR107_g014_t01 tca|Tcan_03232.1
1707	1	1	1	1	asu|AgB04_g442_t01 pun|PgR107_g001_t01 tca|Tcan_03219.1 cel|CE_T20B12.7
1708	1	1	1	1	asu|AgB04_g450_t02 cel|CE_C04F1.3 pun|PgR107_g008_t01 tca|Tcan_18836.1
1709	1	1	1	1	asu|AgB05_g006_t02 cel|CE_R02F2.1a pun|PgR015_g026_t01 tca|Tcan_10849.1
1710	1	1	1	1	asu|AgB05_g022_t05 cel|CE_C16C10.5 pun|PgR015_g015_t01 tca|Tcan_12882.1
1711	1	1	1	1	asu|AgB05_g023_t05 cel|CE_C47D12.7a pun|PgR015_g014_t01 tca|Tcan_12884.1
1712	1	1	1	1	asu|AgB05_g025_t05 cel|CE_C16C10.7a pun|PgR067_g041_t01 tca|Tcan_12883.1
1713	1	1	1	1	asu|AgB05_g030_t02 cel|CE_Y37D8A.25 pun|PgR067_g051_t06 tca|Tcan_16246.1
1714	1	1	1	1	asu|AgB05_g039_t01 cel|CE_ZK643.1a tca|Tcan_15820.1 pun|PgR067_g043_t02
1715	1	1	1	1	asu|AgB05_g040_t02 cel|CE_ZK1010.3 pun|PgR067_g054_t02 tca|Tcan_07705.1
1716	1	1	1	1	asu|AgB05_g048_t04 cel|CE_C34C12.6 pun|PgR067_g031_t02 tca|Tcan_13971.1
1717	1	1	1	1	asu|AgB05_g058_t03 cel|CE_M142.8a pun|PgR067_g018_t01 tca|Tcan_13964.1
1718	1	1	1	1	asu|AgB05_g060_t01 cel|CE_M142.5 pun|PgR067_g017_t01 tca|Tcan_13932.1
1719	1	1	1	1	asu|AgB05_g066_t05 cel|CE_Y47D3A.25 pun|PgR067_g011_t02 tca|Tcan_13944.1
1720	1	1	1	1	asu|AgB05_g068_t02 cel|CE_Y39E4B.8 pun|PgR067_g007_t03 tca|Tcan_13947.1
1721	1	1	1	1	asu|AgB05_g070_t03 cel|CE_F57B9.4a pun|PgR067_g006_t01 tca|Tcan_13974.1
1722	1	1	1	1	asu|AgB05_g073_t02 cel|CE_F58F6.4 pun|PgR067_g003_t01 tca|Tcan_13934.1
1723	1	1	1	1	asu|AgB05_g074_t02 cel|CE_F44E2.10 pun|PgR067_g002_t01 tca|Tcan_13963.1
1724	1	1	1	1	asu|AgB05_g075_t01 cel|CE_M60.7 pun|PgR067_g001_t03 tca|Tcan_13957.1
1725	1	1	1	1	asu|AgB05_g076_t01 cel|CE_R13A5.10 pun|PgR153_g006_t01 tca|Tcan_13970.1
1726	1	1	1	1	asu|AgB05_g079_t03 cel|CE_C03B8.4 pun|PgR153_g005_t01 tca|Tcan_13975.1
1727	1	1	1	1	asu|AgB05_g086_t03 cel|CE_F57B9.7a pun|PgR153_g002_t01 tca|Tcan_07690.1
1728	1	1	1	1	asu|AgB05_g090_t03 cel|CE_ZK507.6 pun|PgR171_g003_t03 tca|Tcan_07758.1
1729	1	1	1	1	asu|AgB05_g093_t02 cel|CE_C48B4.2 pun|PgR171_g006_t01 tca|Tcan_07729.1
1730	1	1	1	1	asu|AgB05_g102_t01 cel|CE_Y76A2B.2 pun|PgR098_g008_t01 tca|Tcan_07688.1
1731	1	1	1	1	asu|AgB05_g106_t01 cel|CE_K01A2.11a pun|PgR098_g013_t01 tca|Tcan_07727.1
1732	1	1	1	1	pun|PgR098_g018_t05 asu|AgR063_g030_t05 cel|CE_M01A8.2a tca|Tcan_07711.1
1733	1	1	1	1	asu|AgB05_g121_t02 cel|CE_Y52D3.1a pun|PgR098_g025_t01 tca|Tcan_07706.1
1734	1	1	1	1	asu|AgB05_g125_t07 cel|CE_Y71D11A.2 pun|PgR098_g027_t01 tca|Tcan_13966.1
1735	1	1	1	1	asu|AgB05_g127_t01 cel|CE_T24A11.1a pun|PgR098_g028_t05 tca|Tcan_13954.1
1736	1	1	1	1	asu|AgB05_g133_t01 pun|PgR012_g197_t01 tca|Tcan_13976.1 cel|CE_M142.6a
1737	1	1	1	1	asu|AgB05_g135_t02 cel|CE_R151.7a pun|PgR012_g196_t02 tca|Tcan_13959.1
1738	1	1	1	1	asu|AgB05_g146_t03 cel|CE_ZK1128.6a pun|PgR012_g192_t03 tca|Tcan_13949.1
1739	1	1	1	1	asu|AgB05_g150_t03 tca|Tcan_07704.1 cel|CE_F21H11.3 pun|PgR012_g187_t01
1740	1	1	1	1	asu|AgB05_g151_t02 cel|CE_F21H11.2a pun|PgR012_g186_t08 tca|Tcan_07713.1
1741	1	1	1	1	asu|AgB05_g159_t01 cel|CE_K07F5.13a pun|PgR012_g022_t01 tca|Tcan_12521.1
1742	1	1	1	1	asu|AgB05_g169_t04 cel|CE_C16C10.8 pun|PgR012_g027_t01 tca|Tcan_06878.1
1743	1	1	1	1	asu|AgB05_g172_t05 cel|CE_T04C9.6a pun|PgR012_g028_t01 tca|Tcan_06863.1
1744	1	1	1	1	asu|AgB05_g176_t02 pun|PgR012_g030_t02 tca|Tcan_06877.1 cel|CE_B0393.3
1745	1	1	1	1	asu|AgB05_g178_t01 cel|CE_C38D4.5a pun|PgR012_g033_t01 tca|Tcan_06866.1
1746	1	1	1	1	asu|AgB05_g179_t05 cel|CE_C38D4.9 pun|PgR012_g034_t05 tca|Tcan_06876.1
1747	1	1	1	1	asu|AgB05_g180_t13 cel|CE_Y47D3B.9 pun|PgR012_g037_t01 tca|Tcan_06871.1
1748	1	1	1	1	asu|AgB05_g183_t07 cel|CE_F42H10.5a pun|PgR012_g040_t02 tca|Tcan_06872.1
1749	1	1	1	1	asu|AgB05_g186_t02 cel|CE_ZK512.1 pun|PgR012_g042_t01 tca|Tcan_03802.1
1750	1	1	1	1	asu|AgB05_g189_t04 cel|CE_T20G5.5 pun|PgR012_g045_t02 tca|Tcan_03797.1
1751	1	1	1	1	asu|AgB05_g191_t03 cel|CE_Y111B2A.19 pun|PgR012_g046_t03 tca|Tcan_03796.1
1752	1	1	1	1	asu|AgB05_g193_t07 cel|CE_F17C11.7a pun|PgR012_g048_t04 tca|Tcan_03800.1
1753	1	1	1	1	asu|AgB05_g195_t01 pun|PgR012_g050_t01 tca|Tcan_02672.1 cel|CE_Y54F10AR.2
1754	1	1	1	1	asu|AgB05_g204_t02 cel|CE_C25D7.8 pun|PgR101_g023_t01 tca|Tcan_17143.1
1755	1	1	1	1	asu|AgB05_g206_t02 cel|CE_Y37D8A.1 pun|PgR101_g021_t02 tca|Tcan_15925.1
1756	1	1	1	1	asu|AgB05_g210_t01 cel|CE_Y51H4A.7 pun|PgR008_g096_t03 tca|Tcan_08762.1
1757	1	1	1	1	asu|AgB05_g216_t01 cel|CE_M153.4 pun|PgR008_g139_t01 tca|Tcan_18813.1
1758	1	1	1	1	asu|AgB05_g226_t06 pun|PgB01_g212_t02 tca|Tcan_18805.1 cel|CE_F46H5.6
1759	1	1	1	1	asu|AgB05_g234_t01 cel|CE_C38C5.1a tca|Tcan_18795.1 pun|PgB01_g183_t01
1760	1	1	1	1	asu|AgB05_g235_t03 cel|CE_F14D12.4a pun|PgB01_g184_t01 tca|Tcan_18816.1
1761	1	1	1	1	asu|AgB05_g240_t01 cel|CE_Y105E8A.8 pun|PgB01_g188_t01 tca|Tcan_18797.1
1762	1	1	1	1	asu|AgB05_g243_t02 pun|PgB01_g192_t01 tca|Tcan_16827.1 cel|CE_T05G5.9a
1763	1	1	1	1	asu|AgB05_g245_t01 pun|PgB01_g193_t01 tca|Tcan_16826.1 cel|CE_C10E2.3a
1764	1	1	1	1	asu|AgB05_g248_t05 pun|PgB01_g196_t02 tca|Tcan_15151.1 cel|CE_F33H1.4
1765	1	1	1	1	asu|AgB05_g249_t01 cel|CE_C26B9.3 pun|PgB01_g197_t01 tca|Tcan_15148.1
1766	1	1	1	1	asu|AgB05_g250_t01 cel|CE_C05E7.1 pun|PgB01_g198_t01 tca|Tcan_15144.1
1767	1	1	1	1	asu|AgB05_g251_t01 cel|CE_C05E7.2 pun|PgB01_g199_t01 tca|Tcan_15130.1
1768	1	1	1	1	asu|AgB05_g252_t02 cel|CE_C34E7.4 pun|PgB01_g200_t01 tca|Tcan_15140.1
1769	1	1	1	1	asu|AgB05_g253_t01 cel|CE_T08G2.2 pun|PgB01_g201_t02 tca|Tcan_15141.1
1770	1	1	1	1	asu|AgB05_g257_t02 cel|CE_K09H9.2 pun|PgB01_g207_t01 tca|Tcan_18164.1
1771	1	1	1	1	asu|AgB05_g258_t04 cel|CE_T03F1.3 pun|PgB01_g209_t05 tca|Tcan_18218.1
1772	1	1	1	1	asu|AgB05_g260_t01 pun|PgB01_g179_t03 tca|Tcan_15584.1 cel|CE_T07F10.3
1773	1	1	1	1	asu|AgB05_g273_t06 pun|PgB01_g166_t03 tca|Tcan_18844.1 cel|CE_R08D7.2
1774	1	1	1	1	asu|AgB05_g274_t01 cel|CE_Y113G7A.9a pun|PgB01_g165_t02 tca|Tcan_18856.1
1775	1	1	1	1	asu|AgB05_g278_t08 cel|CE_F32D1.10 pun|PgB01_g161_t08 tca|Tcan_18847.1
1776	1	1	1	1	asu|AgB05_g279_t07 cel|CE_K03E5.3 pun|PgB01_g160_t01 tca|Tcan_18854.1
1777	1	1	1	1	asu|AgB05_g281_t01 cel|CE_Y24F12A.2a pun|PgB01_g159_t02 tca|Tcan_18850.1
1778	1	1	1	1	asu|AgB05_g282_t01 cel|CE_H36L18.1 pun|PgB01_g158_t02 tca|Tcan_18852.1
1779	1	1	1	1	asu|AgB05_g286_t01 cel|CE_C41D11.8 pun|PgB01_g156_t01 tca|Tcan_06943.1
1780	1	1	1	1	asu|AgB05_g289_t01 cel|CE_F16F9.1 pun|PgB01_g155_t01 tca|Tcan_17395.1
1781	1	1	1	1	asu|AgB05_g292_t04 cel|CE_H05G16.1 pun|PgB01_g152_t02 tca|Tcan_17390.1
1782	1	1	1	1	asu|AgB05_g296_t02 cel|CE_F49E7.2 pun|PgB01_g148_t01 tca|Tcan_17408.1
1783	1	1	1	1	asu|AgB05_g308_t04 cel|CE_F54D11.1 pun|PgB07_g042_t03 tca|Tcan_13594.1
1784	1	1	1	1	asu|AgB05_g309_t01 cel|CE_K08F11.5 pun|PgB07_g043_t01 tca|Tcan_03313.1
1785	1	1	1	1	asu|AgB05_g320_t04 pun|PgB07_g035_t01 tca|Tcan_14108.1 cel|CE_C50F7.6a
1786	1	1	1	1	asu|AgB05_g323_t01 cel|CE_F01E11.4 pun|PgB07_g033_t01 tca|Tcan_01561.1
1787	1	1	1	1	asu|AgB05_g332_t04 cel|CE_K02G10.3 pun|PgB07_g027_t01 tca|Tcan_14102.1
1788	1	1	1	1	asu|AgB05_g334_t11 cel|CE_R53.1a pun|PgB07_g025_t02 tca|Tcan_03325.1
1789	1	1	1	1	asu|AgB05_g339_t05 cel|CE_F09E5.5 pun|PgB07_g019_t01 tca|Tcan_03336.1
1790	1	1	1	1	asu|AgB05_g341_t02 cel|CE_Y16B4A.1 pun|PgB07_g017_t01 tca|Tcan_03316.1
1791	1	1	1	1	asu|AgB05_g342_t01 cel|CE_F42D1.2 pun|PgB07_g016_t01 tca|Tcan_03330.1
1792	1	1	1	1	asu|AgB05_g344_t03 cel|CE_C33A11.1 pun|PgB07_g014_t02 tca|Tcan_03309.1
1793	1	1	1	1	asu|AgB05_g346_t02 cel|CE_F49H12.6a pun|PgB07_g048_t01 tca|Tcan_03311.1
1794	1	1	1	1	asu|AgB05_g348_t04 pun|PgB07_g049_t01 tca|Tcan_03317.1 cel|CE_C03H12.1a
1795	1	1	1	1	asu|AgB05_g363_t05 cel|CE_C05D10.1a pun|PgB07_g056_t01 tca|Tcan_16795.1
1796	1	1	1	1	asu|AgB05_g366_t04 cel|CE_T20B5.1 pun|PgB07_g059_t05 tca|Tcan_17245.1
1797	1	1	1	1	asu|AgB05_g372_t02 pun|PgB07_g064_t01 tca|Tcan_17244.1 cel|CE_R03E9.3a
1798	1	1	1	1	asu|AgB05_g376_t01 cel|CE_Y18D10A.7a pun|PgB07_g065_t05 tca|Tcan_06169.1
1799	1	1	1	1	asu|AgB05_g386_t01 cel|CE_K01C8.3a pun|PgB07_g073_t01 tca|Tcan_08109.1
1800	1	1	1	1	asu|AgB05_g394_t03 cel|CE_B0304.3 pun|PgB07_g082_t01 tca|Tcan_08066.1
1801	1	1	1	1	asu|AgB05_g397_t02 cel|CE_B0304.1a pun|PgB07_g083_t01 tca|Tcan_08108.1
1802	1	1	1	1	asu|AgB05_g401_t02 tca|Tcan_06145.1 cel|CE_C08H9.16 pun|PgB07_g086_t04
1803	1	1	1	1	asu|AgB05_g404_t02 cel|CE_C01F1.3a pun|PgB07_g090_t01 tca|Tcan_06148.1
1804	1	1	1	1	asu|AgB05_g405_t06 cel|CE_F54C9.11 pun|PgB07_g091_t01 tca|Tcan_06132.1
1805	1	1	1	1	asu|AgB05_g409_t09 cel|CE_F28C6.8a pun|PgB07_g092_t01 tca|Tcan_06142.1
1806	1	1	1	1	asu|AgB05_g410_t02 cel|CE_C47G2.4 pun|PgB07_g094_t01 tca|Tcan_15989.1
1807	1	1	1	1	asu|AgB05_g411_t02 cel|CE_C47G2.3 pun|PgB07_g095_t01 tca|Tcan_15990.1
1808	1	1	1	1	asu|AgB05_g418_t06 cel|CE_C44B7.7 pun|PgB07_g100_t02 tca|Tcan_12204.1
1809	1	1	1	1	asu|AgB06_g008_t04 cel|CE_Y76B12C.7a pun|PgB03_g164_t01 tca|Tcan_16578.1
1810	1	1	1	1	asu|AgB06_g010_t01 cel|CE_ZC168.3a pun|PgB03_g162_t02 tca|Tcan_16580.1
1811	1	1	1	1	asu|AgB06_g013_t01 pun|PgB03_g160_t02 tca|Tcan_16570.1 cel|CE_C55B7.9a
1812	1	1	1	1	asu|AgB06_g017_t04 cel|CE_Y69A2AR.28 pun|PgB11_g056_t04 tca|Tcan_14574.1
1813	1	1	1	1	asu|AgB06_g027_t01 cel|CE_Y37A1A.4a pun|PgB03_g153_t05 tca|Tcan_04530.1
1814	1	1	1	1	asu|AgB06_g029_t01 cel|CE_Y105E8A.16 pun|PgR053_g032_t01 tca|Tcan_14613.1
1815	1	1	1	1	asu|AgB06_g032_t02 cel|CE_C25H3.15 pun|PgB03_g150_t02 tca|Tcan_00423.1
1816	1	1	1	1	asu|AgB06_g039_t07 cel|CE_ZK945.9 pun|PgB03_g145_t01 tca|Tcan_12899.1
1817	1	1	1	1	asu|AgB06_g048_t04 cel|CE_B0025.2 pun|PgB03_g140_t01 tca|Tcan_12902.1
1818	1	1	1	1	asu|AgB06_g049_t01 cel|CE_F08B4.6 pun|PgB03_g139_t01 tca|Tcan_12905.1
1819	1	1	1	1	asu|AgB06_g050_t03 pun|PgB03_g138_t01 tca|Tcan_12906.1 cel|CE_F56B3.5
1820	1	1	1	1	asu|AgB06_g053_t01 cel|CE_R08C7.10a pun|PgB03_g135_t02 tca|Tcan_12908.1
1821	1	1	1	1	asu|AgB06_g060_t04 cel|CE_F28F9.1 pun|PgB03_g133_t02 tca|Tcan_17804.1
1822	1	1	1	1	asu|AgB06_g062_t03 cel|CE_W01B6.1 pun|PgB03_g132_t01 tca|Tcan_17800.1
1823	1	1	1	1	asu|AgB06_g065_t01 cel|CE_C10C6.2 pun|PgB03_g131_t01 tca|Tcan_17803.1
1824	1	1	1	1	asu|AgB06_g078_t01 cel|CE_C29E4.12 pun|PgB03_g115_t01 tca|Tcan_00393.1
1825	1	1	1	1	asu|AgB06_g082_t01 cel|CE_F11A10.8 pun|PgB03_g110_t01 tca|Tcan_06715.1
1826	1	1	1	1	asu|AgB06_g084_t07 cel|CE_B0393.4 pun|PgB03_g109_t02 tca|Tcan_06714.1
1827	1	1	1	1	asu|AgB06_g090_t09 pun|PgE361_g001_t03 tca|Tcan_06527.1 cel|CE_Y48G8AL.11a
1828	1	1	1	1	asu|AgB06_g093_t01 cel|CE_F40F11.1 pun|PgB03_g100_t02 tca|Tcan_15363.1
1829	1	1	1	1	asu|AgB06_g108_t07 cel|CE_ZK897.1a pun|PgB03_g091_t04 tca|Tcan_10562.1
1830	1	1	1	1	asu|AgB06_g117_t01 pun|PgB03_g084_t06 tca|Tcan_10557.1 cel|CE_Y77E11A.1a
1831	1	1	1	1	asu|AgB06_g124_t03 pun|PgB03_g075_t01 tca|Tcan_08156.1 cel|CE_F56A11.4a
1832	1	1	1	1	asu|AgB06_g126_t01 pun|PgB03_g074_t01 tca|Tcan_15362.1 cel|CE_T26C12.3a
1833	1	1	1	1	asu|AgB06_g132_t01 cel|CE_Y82E9BR.16a pun|PgB03_g070_t07 tca|Tcan_15359.1
1834	1	1	1	1	asu|AgB06_g137_t01 cel|CE_F10B5.8 pun|PgB03_g064_t01 tca|Tcan_02490.1
1835	1	1	1	1	asu|AgB06_g142_t08 cel|CE_M18.3 pun|PgR158_g003_t04 tca|Tcan_18517.1
1836	1	1	1	1	asu|AgB06_g144_t01 cel|CE_F58A4.14a pun|PgR158_g005_t01 tca|Tcan_18529.1
1837	1	1	1	1	asu|AgB06_g147_t01 cel|CE_F28D1.10 pun|PgR006_g090_t01 tca|Tcan_18521.1
1838	1	1	1	1	asu|AgB06_g158_t01 cel|CE_T04C4.1a pun|PgR097_g001_t07 tca|Tcan_11608.1
1839	1	1	1	1	asu|AgB06_g171_t02 cel|CE_Y73F8A.27 pun|PgR177_g006_t01 tca|Tcan_08898.1
1840	1	1	1	1	asu|AgB06_g172_t01 cel|CE_Y73F8A.26a pun|PgR177_g005_t01 tca|Tcan_08861.1
1841	1	1	1	1	asu|AgB06_g174_t02 cel|CE_F53A9.5 pun|PgR177_g003_t01 tca|Tcan_08895.1
1842	1	1	1	1	asu|AgB06_g176_t03 cel|CE_ZK792.4a pun|PgR177_g002_t03 tca|Tcan_08886.1
1843	1	1	1	1	asu|AgB06_g180_t03 cel|CE_T14G10.6 pun|PgR045_g002_t01 tca|Tcan_08885.1
1844	1	1	1	1	asu|AgB06_g204_t03 cel|CE_Y73B6BR.1a pun|PgR045_g022_t01 tca|Tcan_08914.1
1845	1	1	1	1	asu|AgB06_g205_t05 cel|CE_B0207.4 pun|PgR045_g024_t05 tca|Tcan_08868.1
1846	1	1	1	1	asu|AgB06_g214_t01 cel|CE_T14G10.7 pun|PgR045_g030_t01 tca|Tcan_08889.1
1847	1	1	1	1	asu|AgB06_g225_t01 cel|CE_W03G1.6a pun|PgR045_g034_t02 tca|Tcan_15889.1
1848	1	1	1	1	asu|AgB06_g227_t01 cel|CE_B0564.10a pun|PgR045_g036_t01 tca|Tcan_15897.1
1849	1	1	1	1	asu|AgB06_g234_t04 cel|CE_T22D1.3a pun|PgR045_g041_t01 tca|Tcan_15890.1
1850	1	1	1	1	asu|AgB06_g236_t03 cel|CE_C46G7.4a pun|PgR045_g043_t01 tca|Tcan_15888.1
1851	1	1	1	1	asu|AgB06_g237_t01 cel|CE_R11A8.6 pun|PgR045_g044_t12 tca|Tcan_15895.1
1852	1	1	1	1	asu|AgB06_g238_t02 cel|CE_Y57G11C.43 pun|PgR045_g045_t03 tca|Tcan_15893.1
1853	1	1	1	1	asu|AgB06_g239_t08 cel|CE_F56H11.1a pun|PgR045_g046_t06 tca|Tcan_15892.1
1854	1	1	1	1	asu|AgB06_g243_t03 cel|CE_C09B9.8a pun|PgR045_g047_t01 tca|Tcan_00251.1
1855	1	1	1	1	asu|AgB06_g250_t05 cel|CE_F19C7.8a pun|PgR045_g051_t01 tca|Tcan_01957.1
1856	1	1	1	1	asu|AgB06_g251_t03 cel|CE_Y55F3C.7a pun|PgR045_g052_t01 tca|Tcan_11303.1
1857	1	1	1	1	asu|AgB06_g253_t04 cel|CE_C10G8.7 pun|PgR036_g086_t01 tca|Tcan_07172.1
1858	1	1	1	1	asu|AgB06_g257_t09 cel|CE_F23F1.9 pun|PgR036_g090_t01 tca|Tcan_07170.1
1859	1	1	1	1	asu|AgB06_g264_t05 cel|CE_C24G6.3 pun|PgR036_g097_t11 tca|Tcan_05344.1
1860	1	1	1	1	asu|AgB06_g266_t04 cel|CE_F08F3.4 pun|PgR036_g099_t01 tca|Tcan_05332.1
1861	1	1	1	1	asu|AgB06_g279_t02 cel|CE_K12F2.2a pun|PgR036_g106_t10 tca|Tcan_18655.1
1862	1	1	1	1	asu|AgB06_g285_t01 pun|PgR036_g111_t04 tca|Tcan_11511.1 cel|CE_T23B12.4
1863	1	1	1	1	asu|AgB06_g288_t04 cel|CE_ZK863.7a pun|PgR036_g114_t01 tca|Tcan_11522.1
1864	1	1	1	1	asu|AgB06_g290_t09 cel|CE_W02F12.5 pun|PgR036_g118_t03 tca|Tcan_04420.1
1865	1	1	1	1	asu|AgB06_g291_t01 cel|CE_Y60A3A.10 pun|PgR073_g034_t01 tca|Tcan_17240.1
1866	1	1	1	1	asu|AgB06_g292_t01 cel|CE_Y60A3A.9 pun|PgR073_g035_t01 tca|Tcan_17241.1
1867	1	1	1	1	asu|AgB06_g293_t01 cel|CE_Y116F11B.12a pun|PgR073_g036_t01 tca|Tcan_17236.1
1868	1	1	1	1	asu|AgB06_g294_t01 cel|CE_Y60A3A.13a pun|PgR073_g037_t02 tca|Tcan_17239.1
1869	1	1	1	1	asu|AgB06_g295_t02 cel|CE_F25B3.3a pun|PgR073_g038_t03 tca|Tcan_03536.1
1870	1	1	1	1	asu|AgB06_g297_t01 cel|CE_T26A8.2 pun|PgR073_g041_t01 tca|Tcan_03538.1
1871	1	1	1	1	asu|AgB06_g302_t02 cel|CE_Y80D3A.1 pun|PgR073_g044_t02 tca|Tcan_06444.1
1872	1	1	1	1	asu|AgB06_g304_t02 cel|CE_T21H3.2a pun|PgR073_g045_t01 tca|Tcan_14740.1
1873	1	1	1	1	asu|AgB06_g307_t01 pun|PgR250_g002_t01 tca|Tcan_14982.1 cel|CE_F15B9.10a
1874	1	1	1	1	asu|AgB06_g308_t05 cel|CE_F28C1.2a pun|PgR250_g001_t01 tca|Tcan_14983.1
1875	1	1	1	1	asu|AgB06_g310_t01 cel|CE_R02D5.3 pun|PgR079_g038_t01 tca|Tcan_14978.1
1876	1	1	1	1	asu|AgB06_g311_t02 cel|CE_C39F7.2a pun|PgR079_g036_t04 tca|Tcan_14988.1
1877	1	1	1	1	asu|AgB06_g316_t02 pun|PgR079_g031_t01 tca|Tcan_06385.1 cel|CE_F31D4.3
1878	1	1	1	1	asu|AgB06_g321_t04 cel|CE_ZK742.2 pun|PgR079_g027_t01 tca|Tcan_06365.1
1879	1	1	1	1	asu|AgB06_g322_t09 cel|CE_F32A7.4 pun|PgR079_g026_t02 tca|Tcan_06376.1
1880	1	1	1	1	asu|AgB06_g325_t03 cel|CE_Y97E10AR.5 pun|PgR079_g024_t01 tca|Tcan_06381.1
1881	1	1	1	1	asu|AgB06_g328_t06 cel|CE_F40F9.10 pun|PgR079_g019_t01 tca|Tcan_05079.1
1882	1	1	1	1	asu|AgB06_g329_t01 cel|CE_F25C8.4 pun|PgR013_g076_t02 tca|Tcan_07532.1
1883	1	1	1	1	asu|AgB06_g335_t01 cel|CE_ZC404.3a pun|PgR079_g013_t01 tca|Tcan_11241.1
1884	1	1	1	1	asu|AgB06_g336_t01 cel|CE_Y113G7A.8a pun|PgR079_g012_t03 tca|Tcan_15533.1
1885	1	1	1	1	asu|AgB06_g337_t05 cel|CE_T01D3.5 pun|PgR079_g010_t02 tca|Tcan_04814.1
1886	1	1	1	1	asu|AgB06_g343_t01 cel|CE_CD4.3 pun|PgR079_g007_t01 tca|Tcan_04817.1
1887	1	1	1	1	asu|AgB06_g344_t02 cel|CE_CD4.4 pun|PgR079_g005_t01 tca|Tcan_04813.1
1888	1	1	1	1	asu|AgB06_g346_t02 cel|CE_ZK856.1 pun|PgR079_g004_t01 tca|Tcan_03729.1
1889	1	1	1	1	asu|AgB06_g347_t01 cel|CE_F21C10.7 pun|PgR079_g003_t01 tca|Tcan_03728.1
1890	1	1	1	1	asu|AgB06_g348_t03 cel|CE_C15H11.4 pun|PgR079_g002_t01 tca|Tcan_18992.1
1891	1	1	1	1	asu|AgB06_g352_t01 cel|CE_Y41E3.7a pun|PgR192_g002_t01 tca|Tcan_18993.1
1892	1	1	1	1	asu|AgB07_g008_t04 cel|CE_F29B9.12 pun|PgB14X_g065_t02 tca|Tcan_14457.1
1893	1	1	1	1	asu|AgB07_g024_t03 cel|CE_C40H5.5a pun|PgR105_g006_t01 tca|Tcan_14012.1
1894	1	1	1	1	asu|AgB07_g027_t01 cel|CE_F08G12.1 pun|PgR105_g008_t02 tca|Tcan_14003.1
1895	1	1	1	1	asu|AgB07_g029_t01 cel|CE_Y74C9A.3 pun|PgR105_g010_t01 tca|Tcan_14000.1
1896	1	1	1	1	asu|AgB07_g032_t01 cel|CE_W02H5.8 pun|PgR006_g205_t01 tca|Tcan_11670.1
1897	1	1	1	1	asu|AgB07_g033_t01 cel|CE_F18H3.4 pun|PgR105_g012_t03 tca|Tcan_05853.1
1898	1	1	1	1	asu|AgB07_g042_t01 cel|CE_F09F9.2 pun|PgR105_g015_t01 tca|Tcan_03823.1
1899	1	1	1	1	asu|AgB07_g044_t01 pun|PgR105_g017_t01 tca|Tcan_03828.1 cel|CE_Y94H6A.3
1900	1	1	1	1	asu|AgB07_g050_t02 cel|CE_C54G7.2 pun|PgR105_g025_t05 tca|Tcan_03826.1
1901	1	1	1	1	asu|AgB07_g054_t04 cel|CE_W09C5.2 pun|PgR105_g028_t01 tca|Tcan_05844.1
1902	1	1	1	1	asu|AgB07_g059_t03 cel|CE_ZK616.6a pun|PgR105_g033_t03 tca|Tcan_09142.1
1903	1	1	1	1	asu|AgB07_g061_t02 cel|CE_F55D10.5 pun|PgR105_g035_t02 tca|Tcan_09139.1
1904	1	1	1	1	asu|AgB07_g066_t02 cel|CE_T03G11.9 pun|PgR105_g038_t01 tca|Tcan_09119.1
1905	1	1	1	1	asu|AgB07_g067_t02 cel|CE_T02H6.11 pun|PgR105_g039_t03 tca|Tcan_09126.1
1906	1	1	1	1	asu|AgB07_g074_t01 cel|CE_F08B12.2 pun|PgR005X_g230_t01 tca|Tcan_02434.1
1907	1	1	1	1	asu|AgB07_g087_t01 cel|CE_ZC395.6 pun|PgR044_g074_t05 tca|Tcan_16192.1
1908	1	1	1	1	asu|AgB07_g093_t01 cel|CE_C02C2.3 pun|PgR075_g041_t02 tca|Tcan_14278.1
1909	1	1	1	1	asu|AgB07_g099_t04 cel|CE_F20H11.2 pun|PgR075_g038_t05 tca|Tcan_14273.1
1910	1	1	1	1	asu|AgB07_g101_t07 cel|CE_T26A5.7a pun|PgR075_g037_t02 tca|Tcan_14281.1
1911	1	1	1	1	asu|AgB07_g102_t04 pun|PgR075_g036_t05 tca|Tcan_14272.1 cel|CE_T26A5.6
1912	1	1	1	1	asu|AgB07_g103_t01 cel|CE_T20G5.6 pun|PgR075_g034_t01 tca|Tcan_14279.1
1913	1	1	1	1	asu|AgB07_g105_t06 cel|CE_C14B9.7 pun|PgR075_g033_t03 tca|Tcan_14286.1
1914	1	1	1	1	asu|AgB07_g110_t10 cel|CE_Y55B1AL.3a pun|PgR075_g026_t04 tca|Tcan_05249.1
1915	1	1	1	1	asu|AgB07_g112_t06 cel|CE_F59B2.3 pun|PgR075_g025_t05 tca|Tcan_05248.1
1916	1	1	1	1	asu|AgB07_g113_t01 cel|CE_ZK637.7a pun|PgR075_g023_t01 tca|Tcan_11070.1
1917	1	1	1	1	asu|AgB07_g114_t01 cel|CE_F58A4.9 pun|PgR075_g022_t01 tca|Tcan_11072.1
1918	1	1	1	1	asu|AgB07_g115_t02 cel|CE_F58A4.8 pun|PgR075_g021_t01 tca|Tcan_11071.1
1919	1	1	1	1	asu|AgB07_g119_t01 cel|CE_C02B8.4 pun|PgR075_g017_t01 tca|Tcan_15493.1
1920	1	1	1	1	asu|AgB07_g122_t03 cel|CE_F09G8.2 pun|PgR075_g012_t01 tca|Tcan_06307.1
1921	1	1	1	1	asu|AgB07_g124_t03 cel|CE_F45G2.3 pun|PgR075_g009_t03 tca|Tcan_06311.1
1922	1	1	1	1	asu|AgB07_g128_t04 cel|CE_C07G2.3a pun|PgR075_g006_t06 tca|Tcan_06310.1
1923	1	1	1	1	asu|AgB07_g130_t03 cel|CE_C07G2.2a pun|PgR075_g005_t01 tca|Tcan_07505.1
1924	1	1	1	1	asu|AgB07_g132_t01 cel|CE_F26F4.3 pun|PgR075_g003_t01 tca|Tcan_07494.1
1925	1	1	1	1	asu|AgB07_g134_t02 cel|CE_C45G9.7 pun|PgR075_g002_t01 tca|Tcan_07499.1
1926	1	1	1	1	asu|AgB07_g140_t11 cel|CE_K11H3.1a pun|PgR043_g001_t04 tca|Tcan_07495.1
1927	1	1	1	1	asu|AgB07_g156_t01 cel|CE_F53A2.8a pun|PgR043_g011_t01 tca|Tcan_15499.1
1928	1	1	1	1	asu|AgB07_g158_t04 cel|CE_H06I04.3a pun|PgR043_g013_t01 tca|Tcan_15491.1
1929	1	1	1	1	asu|AgB07_g159_t01 cel|CE_F22B7.9 pun|PgR043_g014_t02 tca|Tcan_15495.1
1930	1	1	1	1	asu|AgB07_g162_t04 cel|CE_F13H8.2 pun|PgR043_g015_t01 tca|Tcan_13162.1
1931	1	1	1	1	asu|AgB07_g166_t03 pun|PgR043_g019_t02 tca|Tcan_18635.1 cel|CE_H10E21.1a
1932	1	1	1	1	asu|AgB07_g167_t04 cel|CE_Y73B6BL.33a pun|PgR043_g020_t02 tca|Tcan_18639.1
1933	1	1	1	1	asu|AgB07_g170_t02 cel|CE_T24C4.6a pun|PgR043_g021_t06 tca|Tcan_13699.1
1934	1	1	1	1	asu|AgB07_g180_t03 cel|CE_T27E9.9 pun|PgR043_g026_t05 tca|Tcan_03860.1
1935	1	1	1	1	asu|AgB07_g190_t01 cel|CE_R01H10.1 pun|PgR043_g031_t01 tca|Tcan_07493.1
1936	1	1	1	1	asu|AgB07_g194_t03 cel|CE_K03B8.6 pun|PgR203_g001_t06 tca|Tcan_00089.1
1937	1	1	1	1	asu|AgB07_g207_t05 cel|CE_K08B12.5a pun|PgR003_g001_t06 tca|Tcan_09587.1
1938	1	1	1	1	asu|AgB07_g209_t01 cel|CE_C05C8.6 pun|PgR003_g003_t01 tca|Tcan_09573.1
1939	1	1	1	1	asu|AgB07_g212_t03 cel|CE_R04F11.4a pun|PgR003_g006_t01 tca|Tcan_09582.1
1940	1	1	1	1	asu|AgB07_g233_t01 cel|CE_F55C5.5 pun|PgR003_g058_t01 tca|Tcan_08244.1
1941	1	1	1	1	asu|AgB07_g236_t07 cel|CE_C10B5.3 pun|PgR003_g028_t01 tca|Tcan_08269.1
1942	1	1	1	1	asu|AgB07_g242_t05 cel|CE_F35B12.2 pun|PgR003_g024_t04 tca|Tcan_08264.1
1943	1	1	1	1	asu|AgB07_g247_t02 cel|CE_F31D4.5a pun|PgR003_g020_t02 tca|Tcan_08261.1
1944	1	1	1	1	asu|AgB07_g249_t07 cel|CE_T01C3.7 pun|PgR013_g037_t02 tca|Tcan_08256.1
1945	1	1	1	1	asu|AgB07_g253_t03 cel|CE_K09G1.4a pun|PgR003_g043_t01 tca|Tcan_08253.1
1946	1	1	1	1	asu|AgB07_g256_t02 cel|CE_W06D12.2 pun|PgR003_g045_t02 tca|Tcan_08276.1
1947	1	1	1	1	asu|AgB07_g258_t04 cel|CE_C15C8.2a pun|PgR003_g046_t01 tca|Tcan_08273.1
1948	1	1	1	1	asu|AgB07_g261_t01 cel|CE_R31.3 pun|PgR003_g050_t01 tca|Tcan_08254.1
1949	1	1	1	1	asu|AgB07_g265_t01 cel|CE_Y97E10AR.6 pun|PgR003_g051_t01 tca|Tcan_17896.1
1950	1	1	1	1	asu|AgB07_g270_t01 tca|Tcan_06753.1 cel|CE_M01A10.2a pun|PgR018_g094_t01
1951	1	1	1	1	asu|AgB07_g273_t02 cel|CE_F45E12.5a tca|Tcan_04775.1 pun|PgR003_g037_t03
1952	1	1	1	1	asu|AgB07_g276_t02 cel|CE_F18E2.3 pun|PgR120_g018_t01 tca|Tcan_04382.1
1953	1	1	1	1	asu|AgB07_g278_t01 cel|CE_T05B11.1 pun|PgR120_g013_t01 tca|Tcan_04380.1
1954	1	1	1	1	asu|AgB07_g284_t11 cel|CE_F44C4.5 pun|PgR120_g007_t03 tca|Tcan_07772.1
1955	1	1	1	1	asu|AgB07_g285_t02 cel|CE_Y37E11B.3a pun|PgR120_g006_t01 tca|Tcan_07775.1
1956	1	1	1	1	asu|AgB07_g287_t01 cel|CE_R08A2.7 pun|PgR120_g005_t01 tca|Tcan_04777.1
1957	1	1	1	1	asu|AgB07_g289_t04 cel|CE_F47B8.10 pun|PgR120_g003_t03 tca|Tcan_03887.1
1958	1	1	1	1	asu|AgB07_g308_t02 cel|CE_T10B5.5a pun|PgR061_g053_t01 tca|Tcan_07773.1
1959	1	1	1	1	asu|AgB07_g311_t01 cel|CE_F29G9.6b pun|PgR061_g049_t01 tca|Tcan_04721.1
1960	1	1	1	1	asu|AgB08X_g005_t02 cel|CE_F59A6.6a pun|PgR009X_g139_t02 tca|Tcan_17924.1
1961	1	1	1	1	asu|AgB08X_g008_t01 cel|CE_T27F7.1 pun|PgR009X_g137_t01 tca|Tcan_17934.1
1962	1	1	1	1	asu|AgB08X_g010_t05 cel|CE_C18H9.8 pun|PgR009X_g133_t02 tca|Tcan_17935.1
1963	1	1	1	1	asu|AgB08X_g012_t03 cel|CE_ZK546.17 pun|PgR009X_g131_t01 tca|Tcan_15737.1
1964	1	1	1	1	asu|AgB08X_g016_t01 cel|CE_F45H11.4a pun|PgR009X_g124_t01 tca|Tcan_08640.1
1965	1	1	1	1	asu|AgB08X_g020_t03 cel|CE_Y95B8A.1 pun|PgR009X_g121_t01 tca|Tcan_14964.1
1966	1	1	1	1	asu|AgB08X_g027_t06 cel|CE_Y39B6A.43a pun|PgR009X_g112_t03 tca|Tcan_06046.1
1967	1	1	1	1	asu|AgB08X_g033_t07 cel|CE_R06F6.9 pun|PgR009X_g109_t01 tca|Tcan_05399.1
1968	1	1	1	1	asu|AgB08X_g039_t04 cel|CE_R06A4.9a pun|PgR009X_g103_t06 tca|Tcan_05425.1
1969	1	1	1	1	asu|AgB08X_g040_t01 cel|CE_Y48C3A.10 pun|PgR009X_g102_t01 tca|Tcan_05392.1
1970	1	1	1	1	asu|AgB08X_g042_t01 cel|CE_C18E9.9 pun|PgR009X_g101_t02 tca|Tcan_05419.1
1971	1	1	1	1	asu|AgB08X_g043_t02 cel|CE_C05D12.1 pun|PgR009X_g100_t01 tca|Tcan_05397.1
1972	1	1	1	1	asu|AgB08X_g045_t02 cel|CE_C29F5.1 pun|PgR009X_g099_t01 tca|Tcan_05389.1
1973	1	1	1	1	asu|AgB08X_g047_t02 pun|PgR009X_g098_t01 tca|Tcan_05386.1 cel|CE_T13C2.7
1974	1	1	1	1	asu|AgB08X_g051_t01 pun|PgR009X_g096_t01 tca|Tcan_05408.1 cel|CE_F48A11.5a
1975	1	1	1	1	asu|AgB08X_g052_t01 cel|CE_F02E9.9a pun|PgR009X_g095_t01 tca|Tcan_05417.1
1976	1	1	1	1	asu|AgB08X_g053_t01 cel|CE_C14A4.6 pun|PgR009X_g093_t01 tca|Tcan_05413.1
1977	1	1	1	1	asu|AgB08X_g054_t04 cel|CE_Y46G5A.29 pun|PgR009X_g089_t01 tca|Tcan_05407.1
1978	1	1	1	1	asu|AgB08X_g056_t02 cel|CE_F37B12.1 pun|PgR009X_g085_t01 tca|Tcan_05394.1
1979	1	1	1	1	asu|AgB08X_g058_t02 pun|PgR009X_g083_t01 tca|Tcan_05414.1 cel|CE_Y46G5A.1a
1980	1	1	1	1	asu|AgB08X_g061_t05 pun|PgR009X_g081_t01 tca|Tcan_08315.1 cel|CE_F55D12.2a
1981	1	1	1	1	asu|AgB08X_g071_t02 cel|CE_Y73E7A.9a pun|PgR009X_g077_t01 tca|Tcan_08311.1
1982	1	1	1	1	asu|AgB08X_g076_t01 cel|CE_F27D4.1 pun|PgR009X_g053_t01 tca|Tcan_08326.1
1983	1	1	1	1	asu|AgB08X_g077_t05 cel|CE_C41G7.9a pun|PgR009X_g052_t01 tca|Tcan_08323.1
1984	1	1	1	1	asu|AgB08X_g079_t01 cel|CE_R06A10.4 pun|PgR009X_g049_t01 tca|Tcan_14971.1
1985	1	1	1	1	asu|AgB08X_g083_t01 cel|CE_ZC434.9a pun|PgR009X_g040_t01 tca|Tcan_14972.1
1986	1	1	1	1	asu|AgB08X_g084_t01 pun|PgR009X_g041_t01 tca|Tcan_14923.1 cel|CE_F10D11.6a
1987	1	1	1	1	asu|AgB08X_g087_t02 cel|CE_Y48G1C.10a pun|PgR009X_g044_t01 tca|Tcan_14943.1
1988	1	1	1	1	asu|AgB08X_g089_t01 cel|CE_K07A12.4a pun|PgR009X_g046_t02 tca|Tcan_14952.1
1989	1	1	1	1	asu|AgB08X_g092_t06 cel|CE_Y47G6A.19a pun|PgR009X_g038_t01 tca|Tcan_14945.1
1990	1	1	1	1	asu|AgB08X_g093_t03 cel|CE_D1037.1 pun|PgR009X_g036_t04 tca|Tcan_18332.1
1991	1	1	1	1	asu|AgB08X_g095_t02 cel|CE_C09H6.2a pun|PgR009X_g034_t02 tca|Tcan_18324.1
1992	1	1	1	1	asu|AgB08X_g103_t05 cel|CE_F57C9.1a pun|PgR009X_g028_t01 tca|Tcan_03505.1
1993	1	1	1	1	asu|AgB08X_g104_t03 cel|CE_F55D12.4a pun|PgR009X_g027_t01 tca|Tcan_03501.1
1994	1	1	1	1	asu|AgB08X_g107_t04 cel|CE_C25A1.11a pun|PgR009X_g026_t01 tca|Tcan_03499.1
1995	1	1	1	1	asu|AgB08X_g108_t01 cel|CE_C25A1.13 pun|PgR009X_g025_t03 tca|Tcan_03503.1
1996	1	1	1	1	asu|AgB08X_g109_t02 cel|CE_C01A2.5 pun|PgR009X_g024_t02 tca|Tcan_03500.1
1997	1	1	1	1	asu|AgB08X_g111_t01 cel|CE_Y47H9C.7 pun|PgR009X_g022_t01 tca|Tcan_09792.1
1998	1	1	1	1	asu|AgB08X_g112_t02 cel|CE_C48B6.8 pun|PgR009X_g020_t01 tca|Tcan_04234.1
1999	1	1	1	1	asu|AgB08X_g115_t04 cel|CE_Y18H1A.9 pun|PgR009X_g015_t04 tca|Tcan_04231.1
[truncated: 11,659 more rows]

## Sheet: singletons
Organism	Gene_name
Ascaris	AgB01_g001_t01
Ascaris	AgB01_g002_t01
Ascaris	AgB01_g003_t01
Ascaris	AgB01_g006_t01
Ascaris	AgB01_g008_t02
Ascaris	AgB01_g014_t01
Ascaris	AgB01_g017_t02
Ascaris	AgB01_g021_t01
Ascaris	AgB01_g024_t01
Ascaris	AgB01_g029_t01
Ascaris	AgB01_g033_t02
Ascaris	AgB01_g034_t01
Ascaris	AgB01_g036_t03
Ascaris	AgB01_g038_t01
Ascaris	AgB01_g039_t02
Ascaris	AgB01_g040_t01
Ascaris	AgB01_g042_t01
Ascaris	AgB01_g043_t01
Ascaris	AgB01_g044_t01
Ascaris	AgB01_g045_t09
Ascaris	AgB01_g049_t01
Ascaris	AgB01_g054_t01
Ascaris	AgB01_g056_t03
Ascaris	AgB01_g057_t07
Ascaris	AgB01_g058_t01
Ascaris	AgB01_g062_t01
Ascaris	AgB01_g068_t05
Ascaris	AgB01_g069_t01
Ascaris	AgB01_g074_t01
Ascaris	AgB01_g075_t05
Ascaris	AgB01_g076_t01
Ascaris	AgB01_g077_t02
Ascaris	AgB01_g079_t01
Ascaris	AgB01_g080_t01
Ascaris	AgB01_g088_t01
Ascaris	AgB01_g091_t02
Ascaris	AgB01_g092_t02
Ascaris	AgB01_g104_t02
Ascaris	AgB01_g108_t02
Ascaris	AgB01_g112_t01
Ascaris	AgB01_g113_t01
Ascaris	AgB01_g120_t01
Ascaris	AgB01_g121_t03
Ascaris	AgB01_g122_t01
Ascaris	AgB01_g123_t20
Ascaris	AgB01_g124_t01
Ascaris	AgB01_g126_t01
Ascaris	AgB01_g131_t01
Ascaris	AgB01_g132_t01
Ascaris	AgB01_g134_t02
Ascaris	AgB01_g135_t02
Ascaris	AgB01_g137_t01
Ascaris	AgB01_g139_t02
Ascaris	AgB01_g141_t01
Ascaris	AgB01_g142_t04
Ascaris	AgB01_g143_t01
Ascaris	AgB01_g149_t01
Ascaris	AgB01_g153_t02
Ascaris	AgB01_g156_t01
Ascaris	AgB01_g164_t01
Ascaris	AgB01_g166_t02
Ascaris	AgB01_g169_t01
Ascaris	AgB01_g171_t01
Ascaris	AgB01_g177_t01
Ascaris	AgB01_g179_t01
Ascaris	AgB01_g180_t01
Ascaris	AgB01_g181_t01
Ascaris	AgB01_g184_t01
Ascaris	AgB01_g186_t03
Ascaris	AgB01_g187_t01
Ascaris	AgB01_g192_t01
Ascaris	AgB01_g198_t01
Ascaris	AgB01_g202_t01
Ascaris	AgB01_g205_t01
Ascaris	AgB01_g207_t02
Ascaris	AgB01_g213_t01
Ascaris	AgB01_g214_t01
Ascaris	AgB01_g220_t01
Ascaris	AgB01_g222_t01
Ascaris	AgB01_g224_t01
Ascaris	AgB01_g227_t01
Ascaris	AgB01_g229_t01
Ascaris	AgB01_g231_t01
Ascaris	AgB01_g232_t01
Ascaris	AgB01_g233_t05
Ascaris	AgB01_g234_t01
Ascaris	AgB01_g235_t01
Ascaris	AgB01_g238_t04
Ascaris	AgB01_g239_t01
Ascaris	AgB01_g242_t02
Ascaris	AgB01_g243_t01
Ascaris	AgB01_g244_t01
Ascaris	AgB01_g249_t01
Ascaris	AgB01_g250_t01
Ascaris	AgB01_g253_t01
Ascaris	AgB01_g259_t01
Ascaris	AgB01_g260_t01
Ascaris	AgB01_g268_t02
Ascaris	AgB01_g270_t01
Ascaris	AgB01_g275_t01
Ascaris	AgB01_g278_t01
Ascaris	AgB01_g284_t01
Ascaris	AgB01_g286_t02
Ascaris	AgB01_g287_t01
Ascaris	AgB01_g288_t01
Ascaris	AgB01_g293_t01
Ascaris	AgB01_g294_t01
Ascaris	AgB01_g299_t01
Ascaris	AgB01_g303_t03
Ascaris	AgB01_g307_t01
Ascaris	AgB01_g308_t01
Ascaris	AgB01_g309_t01
Ascaris	AgB01_g318_t03
Ascaris	AgB01_g319_t01
Ascaris	AgB01_g320_t01
Ascaris	AgB01_g322_t03
Ascaris	AgB01_g323_t01
Ascaris	AgB01_g326_t01
Ascaris	AgB01_g328_t01
Ascaris	AgB01_g331_t01
Ascaris	AgB01_g332_t01
Ascaris	AgB01_g336_t01
Ascaris	AgB01_g341_t01
Ascaris	AgB01_g342_t01
Ascaris	AgB01_g343_t01
Ascaris	AgB01_g345_t01
Ascaris	AgB01_g348_t01
Ascaris	AgB01_g350_t01
Ascaris	AgB01_g358_t01
Ascaris	AgB01_g359_t01
Ascaris	AgB01_g361_t01
Ascaris	AgB01_g363_t02
Ascaris	AgB01_g364_t04
Ascaris	AgB01_g366_t01
Ascaris	AgB01_g367_t01
Ascaris	AgB01_g370_t01
Ascaris	AgB01_g371_t01
Ascaris	AgB01_g373_t01
Ascaris	AgB01_g374_t01
Ascaris	AgB01_g383_t01
Ascaris	AgB01_g385_t01
Ascaris	AgB01_g390_t01
Ascaris	AgB01_g391_t01
Ascaris	AgB01_g393_t01
Ascaris	AgB01_g396_t01
Ascaris	AgB01_g399_t02
Ascaris	AgB01_g408_t01
Ascaris	AgB01_g411_t02
Ascaris	AgB01_g420_t01
Ascaris	AgB01_g425_t01
Ascaris	AgB01_g428_t01
Ascaris	AgB01_g430_t02
Ascaris	AgB01_g432_t01
Ascaris	AgB01_g435_t01
Ascaris	AgB01_g438_t01
Ascaris	AgB01_g439_t01
Ascaris	AgB01_g440_t01
Ascaris	AgB01_g445_t01
Ascaris	AgB01_g447_t01
Ascaris	AgB01_g448_t01
Ascaris	AgB01_g454_t01
Ascaris	AgB01_g457_t01
Ascaris	AgB01_g460_t02
Ascaris	AgB01_g461_t01
Ascaris	AgB01_g466_t01
Ascaris	AgB01_g469_t01
Ascaris	AgB01_g471_t02
Ascaris	AgB01_g473_t01
Ascaris	AgB01_g475_t01
Ascaris	AgB01_g480_t09
Ascaris	AgB01_g483_t01
Ascaris	AgB01_g485_t01
Ascaris	AgB01_g487_t01
Ascaris	AgB01_g493_t01
Ascaris	AgB01_g495_t01
Ascaris	AgB01_g497_t02
Ascaris	AgB01_g499_t04
Ascaris	AgB01_g500_t02
Ascaris	AgB01_g505_t01
Ascaris	AgB01_g506_t01
Ascaris	AgB01_g512_t14
Ascaris	AgB01_g513_t01
Ascaris	AgB01_g515_t01
Ascaris	AgB01_g518_t01
Ascaris	AgB01_g519_t01
Ascaris	AgB01_g520_t01
Ascaris	AgB01_g525_t02
Ascaris	AgB01_g528_t01
Ascaris	AgB01_g529_t01
Ascaris	AgB01_g532_t01
Ascaris	AgB01_g535_t01
Ascaris	AgB01_g539_t01
Ascaris	AgB01_g544_t03
Ascaris	AgB01_g545_t01
Ascaris	AgB01_g549_t01
Ascaris	AgB01_g550_t01
Ascaris	AgB01_g551_t01
Ascaris	AgB01_g552_t01
Ascaris	AgB01_g555_t03
Ascaris	AgB01_g556_t03
Ascaris	AgB01_g563_t01
Ascaris	AgB01_g570_t01
Ascaris	AgB01_g576_t01
Ascaris	AgB01_g577_t06
Ascaris	AgB01_g579_t01
Ascaris	AgB01_g580_t04
Ascaris	AgB01_g585_t05
Ascaris	AgB01_g595_t01
Ascaris	AgB01_g598_t02
Ascaris	AgB01_g599_t01
Ascaris	AgB01_g604_t01
Ascaris	AgB01_g606_t01
Ascaris	AgB01_g609_t01
Ascaris	AgB01_g610_t03
Ascaris	AgB01_g613_t01
Ascaris	AgB01_g615_t02
Ascaris	AgB01_g624_t01
Ascaris	AgB01_g625_t05
Ascaris	AgB01_g627_t01
Ascaris	AgB01_g631_t01
Ascaris	AgB01_g636_t01
Ascaris	AgB01_g638_t01
Ascaris	AgB01_g640_t01
Ascaris	AgB01_g647_t02
Ascaris	AgB01_g651_t01
Ascaris	AgB01_g653_t01
Ascaris	AgB01_g654_t01
Ascaris	AgB01_g655_t01
Ascaris	AgB01_g656_t03
Ascaris	AgB01_g657_t02
Ascaris	AgB01_g659_t01
Ascaris	AgB01_g665_t01
Ascaris	AgB01_g671_t07
Ascaris	AgB01_g672_t01
Ascaris	AgB01_g683_t02
Ascaris	AgB01_g684_t01
Ascaris	AgB01_g689_t01
Ascaris	AgB01_g693_t01
Ascaris	AgB01_g694_t01
Ascaris	AgB01_g702_t01
Ascaris	AgB01_g704_t01
Ascaris	AgB01_g705_t01
Ascaris	AgB01_g715_t01
Ascaris	AgB01_g716_t01
Ascaris	AgB01_g718_t01
Ascaris	AgB01_g720_t01
Ascaris	AgB01_g721_t01
Ascaris	AgB01_g726_t01
Ascaris	AgB01_g731_t03
Ascaris	AgB01_g735_t01
Ascaris	AgB01_g737_t01
Ascaris	AgB01_g741_t01
Ascaris	AgB01_g742_t01
Ascaris	AgB01_g744_t01
Ascaris	AgB01_g748_t01
Ascaris	AgB01_g749_t01
Ascaris	AgB01_g754_t01
Ascaris	AgB01_g755_t01
Ascaris	AgB01_g757_t01
Ascaris	AgB01_g763_t01
Ascaris	AgB01_g766_t01
Ascaris	AgB01_g768_t01
Ascaris	AgB01_g770_t01
Ascaris	AgB01_g775_t02
Ascaris	AgB01_g779_t01
Ascaris	AgB01_g785_t01
Ascaris	AgB01_g786_t01
Ascaris	AgB01_g787_t01
Ascaris	AgB01_g788_t01
Ascaris	AgB01_g793_t01
Ascaris	AgB01_g794_t01
Ascaris	AgB01_g795_t01
Ascaris	AgB01_g796_t01
Ascaris	AgB01_g798_t02
Ascaris	AgB01_g811_t01
Ascaris	AgB01_g812_t05
Ascaris	AgB01_g814_t01
Ascaris	AgB01_g815_t04
Ascaris	AgB01_g817_t01
Ascaris	AgB01_g821_t01
Ascaris	AgB01_g825_t01
Ascaris	AgB01_g826_t01
Ascaris	AgB01_g829_t06
Ascaris	AgB01_g831_t04
Ascaris	AgB01_g835_t01
Ascaris	AgB01_g836_t01
Ascaris	AgB02_g001_t09
Ascaris	AgB02_g003_t01
Ascaris	AgB02_g005_t01
Ascaris	AgB02_g012_t01
Ascaris	AgB02_g013_t01
Ascaris	AgB02_g015_t02
Ascaris	AgB02_g016_t01
Ascaris	AgB02_g018_t01
Ascaris	AgB02_g021_t02
Ascaris	AgB02_g022_t01
Ascaris	AgB02_g023_t01
Ascaris	AgB02_g028_t01
Ascaris	AgB02_g030_t01
Ascaris	AgB02_g032_t01
Ascaris	AgB02_g036_t01
Ascaris	AgB02_g038_t01
Ascaris	AgB02_g044_t01
Ascaris	AgB02_g046_t01
Ascaris	AgB02_g047_t02
Ascaris	AgB02_g052_t02
Ascaris	AgB02_g053_t02
Ascaris	AgB02_g055_t01
Ascaris	AgB02_g056_t01
Ascaris	AgB02_g058_t01
Ascaris	AgB02_g063_t01
Ascaris	AgB02_g064_t01
Ascaris	AgB02_g065_t01
Ascaris	AgB02_g069_t01
Ascaris	AgB02_g070_t01
Ascaris	AgB02_g072_t02
Ascaris	AgB02_g074_t01
Ascaris	AgB02_g076_t01
Ascaris	AgB02_g077_t01
Ascaris	AgB02_g078_t01
Ascaris	AgB02_g081_t01
Ascaris	AgB02_g082_t01
Ascaris	AgB02_g083_t01
Ascaris	AgB02_g087_t01
Ascaris	AgB02_g089_t01
Ascaris	AgB02_g092_t01
Ascaris	AgB02_g093_t01
Ascaris	AgB02_g099_t01
Ascaris	AgB02_g100_t01
Ascaris	AgB02_g101_t01
Ascaris	AgB02_g104_t01
Ascaris	AgB02_g107_t01
Ascaris	AgB02_g110_t01
Ascaris	AgB02_g111_t01
Ascaris	AgB02_g119_t01
Ascaris	AgB02_g121_t03
Ascaris	AgB02_g126_t01
Ascaris	AgB02_g127_t02
Ascaris	AgB02_g129_t01
Ascaris	AgB02_g134_t02
Ascaris	AgB02_g137_t01
Ascaris	AgB02_g138_t01
Ascaris	AgB02_g139_t01
Ascaris	AgB02_g141_t01
Ascaris	AgB02_g142_t01
Ascaris	AgB02_g144_t01
Ascaris	AgB02_g145_t01
Ascaris	AgB02_g146_t03
Ascaris	AgB02_g148_t01
Ascaris	AgB02_g157_t03
Ascaris	AgB02_g158_t01
Ascaris	AgB02_g162_t01
Ascaris	AgB02_g165_t02
Ascaris	AgB02_g166_t01
Ascaris	AgB02_g167_t01
Ascaris	AgB02_g171_t01
Ascaris	AgB02_g173_t01
Ascaris	AgB02_g176_t01
Ascaris	AgB02_g178_t01
Ascaris	AgB02_g184_t01
Ascaris	AgB02_g189_t02
Ascaris	AgB02_g190_t01
Ascaris	AgB02_g192_t01
Ascaris	AgB02_g195_t01
Ascaris	AgB02_g200_t01
Ascaris	AgB02_g201_t01
Ascaris	AgB02_g202_t01
Ascaris	AgB02_g203_t03
Ascaris	AgB02_g204_t01
Ascaris	AgB02_g211_t01
Ascaris	AgB02_g215_t01
Ascaris	AgB02_g221_t01
Ascaris	AgB02_g224_t01
Ascaris	AgB02_g226_t01
Ascaris	AgB02_g227_t01
Ascaris	AgB02_g229_t01
Ascaris	AgB02_g231_t01
Ascaris	AgB02_g232_t01
Ascaris	AgB02_g238_t01
Ascaris	AgB02_g247_t01
Ascaris	AgB02_g256_t01
Ascaris	AgB02_g259_t01
Ascaris	AgB02_g262_t07
Ascaris	AgB02_g267_t02
Ascaris	AgB02_g268_t01
Ascaris	AgB02_g270_t03
Ascaris	AgB02_g271_t02
Ascaris	AgB02_g278_t01
Ascaris	AgB02_g279_t03
Ascaris	AgB02_g280_t01
Ascaris	AgB02_g281_t01
Ascaris	AgB02_g282_t01
Ascaris	AgB02_g284_t01
Ascaris	AgB02_g285_t01
Ascaris	AgB02_g287_t01
Ascaris	AgB02_g289_t04
Ascaris	AgB02_g290_t01
Ascaris	AgB02_g292_t02
Ascaris	AgB02_g297_t04
Ascaris	AgB02_g298_t01
Ascaris	AgB02_g300_t01
Ascaris	AgB02_g302_t01
Ascaris	AgB02_g303_t07
Ascaris	AgB02_g304_t01
Ascaris	AgB02_g310_t01
Ascaris	AgB02_g314_t01
Ascaris	AgB02_g315_t01
Ascaris	AgB02_g324_t06
Ascaris	AgB02_g334_t03
Ascaris	AgB02_g338_t01
Ascaris	AgB02_g346_t02
Ascaris	AgB02_g347_t01
Ascaris	AgB02_g348_t01
Ascaris	AgB02_g350_t01
Ascaris	AgB02_g353_t02
Ascaris	AgB02_g357_t03
Ascaris	AgB02_g358_t03
Ascaris	AgB02_g364_t01
Ascaris	AgB02_g369_t03
Ascaris	AgB02_g370_t01
Ascaris	AgB02_g371_t01
Ascaris	AgB02_g372_t01
Ascaris	AgB02_g375_t02
Ascaris	AgB02_g376_t01
Ascaris	AgB02_g379_t02
Ascaris	AgB02_g386_t01
Ascaris	AgB02_g387_t01
Ascaris	AgB02_g389_t01
Ascaris	AgB02_g390_t01
Ascaris	AgB02_g392_t01
Ascaris	AgB02_g394_t01
Ascaris	AgB02_g395_t02
Ascaris	AgB02_g396_t01
Ascaris	AgB02_g398_t01
Ascaris	AgB02_g402_t03
Ascaris	AgB02_g405_t03
Ascaris	AgB02_g408_t03
Ascaris	AgB02_g422_t01
Ascaris	AgB02_g425_t01
Ascaris	AgB02_g431_t03
Ascaris	AgB02_g434_t01
Ascaris	AgB02_g435_t01
Ascaris	AgB02_g439_t01
Ascaris	AgB02_g440_t01
Ascaris	AgB02_g446_t02
Ascaris	AgB02_g456_t01
Ascaris	AgB02_g458_t01
Ascaris	AgB02_g459_t02
Ascaris	AgB02_g464_t01
Ascaris	AgB02_g467_t01
Ascaris	AgB02_g472_t03
Ascaris	AgB02_g474_t01
Ascaris	AgB02_g475_t06
Ascaris	AgB02_g476_t03
Ascaris	AgB02_g478_t03
Ascaris	AgB02_g479_t01
Ascaris	AgB02_g481_t04
Ascaris	AgB02_g482_t03
Ascaris	AgB02_g483_t03
Ascaris	AgB02_g484_t01
Ascaris	AgB02_g485_t01
Ascaris	AgB02_g487_t02
Ascaris	AgB02_g488_t02
Ascaris	AgB02_g492_t01
Ascaris	AgB02_g493_t01
Ascaris	AgB02_g494_t01
Ascaris	AgB02_g495_t01
Ascaris	AgB02_g496_t01
Ascaris	AgB02_g497_t01
Ascaris	AgB02_g499_t01
Ascaris	AgB02_g500_t01
Ascaris	AgB02_g502_t01
Ascaris	AgB02_g504_t01
Ascaris	AgB02_g506_t02
Ascaris	AgB02_g515_t01
Ascaris	AgB02_g518_t01
Ascaris	AgB02_g526_t03
Ascaris	AgB02_g532_t01
Ascaris	AgB02_g535_t03
Ascaris	AgB02_g536_t01
Ascaris	AgB02_g541_t01
Ascaris	AgB03_g004_t02
Ascaris	AgB03_g005_t01
Ascaris	AgB03_g015_t02
Ascaris	AgB03_g017_t01
Ascaris	AgB03_g020_t01
Ascaris	AgB03_g022_t01
Ascaris	AgB03_g024_t09
Ascaris	AgB03_g027_t01
Ascaris	AgB03_g029_t01
Ascaris	AgB03_g031_t02
Ascaris	AgB03_g032_t03
Ascaris	AgB03_g033_t01
Ascaris	AgB03_g034_t01
Ascaris	AgB03_g035_t02
Ascaris	AgB03_g036_t02
Ascaris	AgB03_g042_t02
Ascaris	AgB03_g051_t01
Ascaris	AgB03_g055_t01
Ascaris	AgB03_g056_t01
Ascaris	AgB03_g058_t01
Ascaris	AgB03_g068_t01
Ascaris	AgB03_g080_t03
Ascaris	AgB03_g081_t02
Ascaris	AgB03_g093_t01
Ascaris	AgB03_g094_t01
Ascaris	AgB03_g098_t01
Ascaris	AgB03_g101_t01
Ascaris	AgB03_g107_t01
Ascaris	AgB03_g110_t03
Ascaris	AgB03_g116_t01
Ascaris	AgB03_g117_t03
Ascaris	AgB03_g120_t01
Ascaris	AgB03_g121_t01
Ascaris	AgB03_g122_t01
Ascaris	AgB03_g123_t01
Ascaris	AgB03_g132_t01
Ascaris	AgB03_g136_t01
Ascaris	AgB03_g138_t01
Ascaris	AgB03_g143_t01
Ascaris	AgB03_g147_t01
Ascaris	AgB03_g149_t01
Ascaris	AgB03_g150_t01
Ascaris	AgB03_g152_t02
Ascaris	AgB03_g154_t01
Ascaris	AgB03_g156_t01
Ascaris	AgB03_g158_t01
Ascaris	AgB03_g159_t02
Ascaris	AgB03_g166_t02
Ascaris	AgB03_g169_t01
Ascaris	AgB03_g171_t01
Ascaris	AgB03_g173_t01
Ascaris	AgB03_g180_t02
Ascaris	AgB03_g186_t01
Ascaris	AgB03_g188_t02
Ascaris	AgB03_g191_t04
Ascaris	AgB03_g194_t01
Ascaris	AgB03_g197_t01
Ascaris	AgB03_g204_t01
Ascaris	AgB03_g205_t01
Ascaris	AgB03_g210_t03
Ascaris	AgB03_g211_t01
Ascaris	AgB03_g217_t01
Ascaris	AgB03_g218_t03
Ascaris	AgB03_g223_t01
Ascaris	AgB03_g224_t01
Ascaris	AgB03_g225_t02
Ascaris	AgB03_g228_t02
Ascaris	AgB03_g230_t01
Ascaris	AgB03_g234_t08
Ascaris	AgB03_g235_t04
Ascaris	AgB03_g239_t01
Ascaris	AgB03_g240_t03
Ascaris	AgB03_g242_t01
Ascaris	AgB03_g245_t01
Ascaris	AgB03_g250_t02
Ascaris	AgB03_g262_t02
Ascaris	AgB03_g265_t01
Ascaris	AgB03_g267_t01
Ascaris	AgB03_g268_t01
Ascaris	AgB03_g272_t01
Ascaris	AgB03_g279_t01
Ascaris	AgB03_g280_t01
Ascaris	AgB03_g282_t03
Ascaris	AgB03_g286_t03
Ascaris	AgB03_g288_t02
Ascaris	AgB03_g291_t02
Ascaris	AgB03_g292_t01
Ascaris	AgB03_g297_t01
Ascaris	AgB03_g299_t01
Ascaris	AgB03_g303_t01
Ascaris	AgB03_g309_t02
Ascaris	AgB03_g312_t07
Ascaris	AgB03_g313_t03
Ascaris	AgB03_g314_t01
Ascaris	AgB03_g315_t01
Ascaris	AgB03_g316_t01
Ascaris	AgB03_g317_t02
Ascaris	AgB03_g320_t01
Ascaris	AgB03_g321_t01
Ascaris	AgB03_g322_t01
Ascaris	AgB03_g325_t01
Ascaris	AgB03_g329_t06
Ascaris	AgB03_g334_t01
Ascaris	AgB03_g336_t01
Ascaris	AgB03_g340_t19
Ascaris	AgB03_g341_t01
Ascaris	AgB03_g342_t02
Ascaris	AgB03_g344_t01
Ascaris	AgB03_g345_t02
Ascaris	AgB03_g349_t01
Ascaris	AgB03_g352_t01
Ascaris	AgB03_g355_t04
Ascaris	AgB03_g356_t03
Ascaris	AgB03_g358_t06
Ascaris	AgB03_g360_t04
Ascaris	AgB03_g364_t01
Ascaris	AgB03_g367_t01
Ascaris	AgB03_g369_t01
Ascaris	AgB03_g371_t01
Ascaris	AgB03_g372_t01
Ascaris	AgB03_g373_t01
Ascaris	AgB03_g375_t01
Ascaris	AgB03_g378_t02
Ascaris	AgB03_g379_t01
Ascaris	AgB03_g381_t12
Ascaris	AgB03_g382_t01
Ascaris	AgB03_g383_t02
Ascaris	AgB03_g385_t01
Ascaris	AgB03_g387_t01
Ascaris	AgB03_g389_t01
Ascaris	AgB03_g391_t01
Ascaris	AgB03_g392_t06
Ascaris	AgB03_g398_t01
Ascaris	AgB03_g401_t01
Ascaris	AgB03_g412_t01
Ascaris	AgB03_g414_t02
Ascaris	AgB03_g418_t01
Ascaris	AgB03_g419_t09
Ascaris	AgB03_g421_t05
Ascaris	AgB03_g424_t19
Ascaris	AgB03_g426_t01
Ascaris	AgB03_g428_t02
Ascaris	AgB03_g429_t05
Ascaris	AgB03_g430_t01
Ascaris	AgB03_g433_t01
Ascaris	AgB03_g436_t01
Ascaris	AgB03_g437_t01
Ascaris	AgB03_g438_t01
Ascaris	AgB03_g440_t01
Ascaris	AgB03_g444_t01
Ascaris	AgB03_g445_t01
Ascaris	AgB03_g446_t02
Ascaris	AgB03_g452_t01
Ascaris	AgB03_g460_t01
Ascaris	AgB03_g464_t01
Ascaris	AgB03_g465_t03
Ascaris	AgB03_g477_t01
Ascaris	AgB03_g479_t02
Ascaris	AgB03_g482_t06
Ascaris	AgB03_g486_t01
Ascaris	AgB03_g491_t02
Ascaris	AgB03_g492_t01
Ascaris	AgB03_g494_t01
Ascaris	AgB03_g495_t01
Ascaris	AgB03_g501_t01
Ascaris	AgB03_g503_t01
Ascaris	AgB03_g504_t01
Ascaris	AgB03_g505_t02
Ascaris	AgB03_g508_t01
Ascaris	AgB03_g510_t01
Ascaris	AgB03_g511_t01
Ascaris	AgB04_g001_t03
Ascaris	AgB04_g002_t01
Ascaris	AgB04_g008_t01
Ascaris	AgB04_g010_t01
Ascaris	AgB04_g024_t06
Ascaris	AgB04_g031_t01
Ascaris	AgB04_g032_t01
Ascaris	AgB04_g033_t01
Ascaris	AgB04_g039_t01
Ascaris	AgB04_g042_t03
Ascaris	AgB04_g047_t02
Ascaris	AgB04_g048_t05
Ascaris	AgB04_g050_t01
Ascaris	AgB04_g059_t01
Ascaris	AgB04_g062_t15
Ascaris	AgB04_g065_t01
Ascaris	AgB04_g067_t01
Ascaris	AgB04_g068_t02
Ascaris	AgB04_g074_t01
Ascaris	AgB04_g076_t01
Ascaris	AgB04_g078_t01
Ascaris	AgB04_g079_t04
Ascaris	AgB04_g082_t01
Ascaris	AgB04_g084_t04
Ascaris	AgB04_g090_t01
Ascaris	AgB04_g093_t01
Ascaris	AgB04_g097_t01
Ascaris	AgB04_g098_t01
Ascaris	AgB04_g101_t01
Ascaris	AgB04_g104_t03
Ascaris	AgB04_g105_t01
Ascaris	AgB04_g107_t01
Ascaris	AgB04_g110_t05
Ascaris	AgB04_g115_t01
Ascaris	AgB04_g121_t01
Ascaris	AgB04_g124_t01
Ascaris	AgB04_g126_t03
Ascaris	AgB04_g127_t01
Ascaris	AgB04_g128_t01
Ascaris	AgB04_g129_t01
Ascaris	AgB04_g131_t05
Ascaris	AgB04_g133_t01
Ascaris	AgB04_g134_t01
Ascaris	AgB04_g137_t01
Ascaris	AgB04_g139_t01
Ascaris	AgB04_g141_t01
Ascaris	AgB04_g147_t01
Ascaris	AgB04_g150_t01
Ascaris	AgB04_g152_t01
Ascaris	AgB04_g155_t01
Ascaris	AgB04_g157_t01
Ascaris	AgB04_g160_t04
Ascaris	AgB04_g165_t01
Ascaris	AgB04_g167_t01
Ascaris	AgB04_g171_t01
Ascaris	AgB04_g175_t01
Ascaris	AgB04_g176_t02
Ascaris	AgB04_g177_t01
Ascaris	AgB04_g178_t01
Ascaris	AgB04_g179_t01
Ascaris	AgB04_g180_t01
Ascaris	AgB04_g182_t01
Ascaris	AgB04_g186_t01
Ascaris	AgB04_g188_t01
Ascaris	AgB04_g190_t01
Ascaris	AgB04_g191_t01
Ascaris	AgB04_g193_t01
Ascaris	AgB04_g195_t03
Ascaris	AgB04_g198_t01
Ascaris	AgB04_g199_t01
Ascaris	AgB04_g216_t01
Ascaris	AgB04_g218_t01
Ascaris	AgB04_g221_t01
Ascaris	AgB04_g222_t01
Ascaris	AgB04_g235_t03
Ascaris	AgB04_g236_t01
Ascaris	AgB04_g238_t01
Ascaris	AgB04_g243_t01
Ascaris	AgB04_g244_t06
Ascaris	AgB04_g246_t02
Ascaris	AgB04_g249_t02
Ascaris	AgB04_g250_t05
Ascaris	AgB04_g251_t01
Ascaris	AgB04_g254_t01
Ascaris	AgB04_g255_t01
Ascaris	AgB04_g256_t07
Ascaris	AgB04_g258_t01
Ascaris	AgB04_g260_t01
Ascaris	AgB04_g264_t02
Ascaris	AgB04_g268_t01
Ascaris	AgB04_g275_t01
Ascaris	AgB04_g276_t03
Ascaris	AgB04_g278_t03
Ascaris	AgB04_g282_t03
Ascaris	AgB04_g284_t01
Ascaris	AgB04_g285_t01
Ascaris	AgB04_g286_t01
Ascaris	AgB04_g295_t01
Ascaris	AgB04_g296_t02
Ascaris	AgB04_g297_t01
Ascaris	AgB04_g303_t04
Ascaris	AgB04_g311_t08
Ascaris	AgB04_g313_t01
Ascaris	AgB04_g314_t05
Ascaris	AgB04_g318_t01
Ascaris	AgB04_g323_t01
Ascaris	AgB04_g326_t01
Ascaris	AgB04_g330_t01
Ascaris	AgB04_g331_t01
Ascaris	AgB04_g337_t01
Ascaris	AgB04_g338_t02
Ascaris	AgB04_g339_t01
Ascaris	AgB04_g340_t03
Ascaris	AgB04_g341_t03
Ascaris	AgB04_g348_t01
Ascaris	AgB04_g353_t01
Ascaris	AgB04_g357_t01
Ascaris	AgB04_g358_t01
Ascaris	AgB04_g361_t01
Ascaris	AgB04_g368_t04
Ascaris	AgB04_g375_t06
Ascaris	AgB04_g376_t01
Ascaris	AgB04_g377_t02
Ascaris	AgB04_g378_t01
Ascaris	AgB04_g380_t01
Ascaris	AgB04_g387_t01
Ascaris	AgB04_g388_t01
Ascaris	AgB04_g389_t11
Ascaris	AgB04_g390_t01
Ascaris	AgB04_g391_t01
Ascaris	AgB04_g395_t01
Ascaris	AgB04_g398_t01
Ascaris	AgB04_g402_t01
Ascaris	AgB04_g410_t02
Ascaris	AgB04_g412_t03
Ascaris	AgB04_g420_t02
Ascaris	AgB04_g423_t01
Ascaris	AgB04_g426_t03
Ascaris	AgB04_g435_t01
Ascaris	AgB04_g436_t01
Ascaris	AgB04_g440_t01
Ascaris	AgB04_g446_t01
Ascaris	AgB04_g451_t01
Ascaris	AgB04_g452_t01
Ascaris	AgB04_g455_t01
Ascaris	AgB04_g456_t02
Ascaris	AgB04_g457_t01
Ascaris	AgB04_g458_t01
Ascaris	AgB04_g459_t01
Ascaris	AgB04_g461_t01
Ascaris	AgB04_g463_t01
Ascaris	AgB04_g464_t01
Ascaris	AgB05_g004_t02
Ascaris	AgB05_g005_t01
Ascaris	AgB05_g007_t01
Ascaris	AgB05_g008_t01
Ascaris	AgB05_g009_t03
Ascaris	AgB05_g010_t06
Ascaris	AgB05_g011_t02
Ascaris	AgB05_g012_t02
Ascaris	AgB05_g014_t01
Ascaris	AgB05_g016_t01
Ascaris	AgB05_g018_t01
Ascaris	AgB05_g019_t01
Ascaris	AgB05_g020_t01
Ascaris	AgB05_g026_t01
Ascaris	AgB05_g029_t01
Ascaris	AgB05_g033_t01
Ascaris	AgB05_g035_t02
Ascaris	AgB05_g036_t01
Ascaris	AgB05_g041_t01
Ascaris	AgB05_g042_t01
Ascaris	AgB05_g043_t05
Ascaris	AgB05_g044_t02
Ascaris	AgB05_g049_t02
Ascaris	AgB05_g052_t01
Ascaris	AgB05_g053_t02
Ascaris	AgB05_g059_t01
Ascaris	AgB05_g063_t01
Ascaris	AgB05_g064_t03
Ascaris	AgB05_g069_t01
Ascaris	AgB05_g072_t02
Ascaris	AgB05_g078_t03
Ascaris	AgB05_g080_t01
Ascaris	AgB05_g081_t02
Ascaris	AgB05_g084_t07
Ascaris	AgB05_g092_t02
Ascaris	AgB05_g098_t01
Ascaris	AgB05_g101_t01
Ascaris	AgB05_g103_t02
Ascaris	AgB05_g107_t01
Ascaris	AgB05_g109_t05
Ascaris	AgB05_g113_t01
Ascaris	AgB05_g115_t01
Ascaris	AgB05_g118_t01
Ascaris	AgB05_g122_t01
Ascaris	AgB05_g123_t01
Ascaris	AgB05_g126_t01
Ascaris	AgB05_g129_t01
Ascaris	AgB05_g132_t01
Ascaris	AgB05_g134_t01
Ascaris	AgB05_g136_t03
Ascaris	AgB05_g138_t01
Ascaris	AgB05_g139_t01
Ascaris	AgB05_g142_t01
Ascaris	AgB05_g145_t02
Ascaris	AgB05_g148_t01
Ascaris	AgB05_g153_t01
Ascaris	AgB05_g154_t01
Ascaris	AgB05_g155_t01
Ascaris	AgB05_g158_t01
Ascaris	AgB05_g161_t01
Ascaris	AgB05_g163_t01
Ascaris	AgB05_g165_t03
Ascaris	AgB05_g167_t03
Ascaris	AgB05_g168_t02
Ascaris	AgB05_g170_t01
Ascaris	AgB05_g171_t01
Ascaris	AgB05_g175_t01
Ascaris	AgB05_g182_t01
Ascaris	AgB05_g185_t01
Ascaris	AgB05_g197_t01
Ascaris	AgB05_g198_t02
Ascaris	AgB05_g199_t01
Ascaris	AgB05_g200_t01
Ascaris	AgB05_g202_t01
Ascaris	AgB05_g203_t03
Ascaris	AgB05_g205_t03
Ascaris	AgB05_g209_t01
Ascaris	AgB05_g218_t01
Ascaris	AgB05_g219_t01
Ascaris	AgB05_g224_t01
Ascaris	AgB05_g229_t01
Ascaris	AgB05_g230_t01
Ascaris	AgB05_g232_t02
Ascaris	AgB05_g236_t01
Ascaris	AgB05_g237_t01
Ascaris	AgB05_g244_t01
Ascaris	AgB05_g246_t01
Ascaris	AgB05_g255_t02
Ascaris	AgB05_g259_t01
Ascaris	AgB05_g267_t01
Ascaris	AgB05_g270_t01
Ascaris	AgB05_g271_t02
Ascaris	AgB05_g276_t01
Ascaris	AgB05_g280_t01
Ascaris	AgB05_g287_t01
Ascaris	AgB05_g288_t01
Ascaris	AgB05_g291_t01
Ascaris	AgB05_g293_t01
Ascaris	AgB05_g300_t01
Ascaris	AgB05_g302_t01
Ascaris	AgB05_g303_t02
Ascaris	AgB05_g305_t01
Ascaris	AgB05_g310_t03
Ascaris	AgB05_g312_t01
Ascaris	AgB05_g313_t01
Ascaris	AgB05_g321_t01
Ascaris	AgB05_g325_t01
Ascaris	AgB05_g328_t01
Ascaris	AgB05_g329_t01
Ascaris	AgB05_g331_t01
Ascaris	AgB05_g338_t04
Ascaris	AgB05_g347_t01
Ascaris	AgB05_g349_t09
Ascaris	AgB05_g353_t01
Ascaris	AgB05_g356_t01
Ascaris	AgB05_g357_t01
Ascaris	AgB05_g360_t01
Ascaris	AgB05_g362_t01
Ascaris	AgB05_g367_t01
Ascaris	AgB05_g368_t01
Ascaris	AgB05_g369_t01
Ascaris	AgB05_g370_t02
Ascaris	AgB05_g373_t01
Ascaris	AgB05_g380_t01
Ascaris	AgB05_g381_t01
Ascaris	AgB05_g384_t01
Ascaris	AgB05_g387_t02
Ascaris	AgB05_g388_t01
Ascaris	AgB05_g390_t01
Ascaris	AgB05_g391_t02
Ascaris	AgB05_g395_t01
Ascaris	AgB05_g396_t01
Ascaris	AgB05_g399_t01
Ascaris	AgB05_g400_t02
Ascaris	AgB05_g406_t01
Ascaris	AgB05_g407_t01
Ascaris	AgB05_g408_t01
Ascaris	AgB05_g415_t03
Ascaris	AgB05_g417_t01
Ascaris	AgB05_g419_t01
Ascaris	AgB05_g421_t01
Ascaris	AgB05_g422_t01
Ascaris	AgB05_g423_t01
Ascaris	AgB05_g425_t01
Ascaris	AgB05_g426_t01
Ascaris	AgB05_g427_t01
Ascaris	AgB05_g428_t01
Ascaris	AgB05_g429_t01
Ascaris	AgB06_g001_t01
Ascaris	AgB06_g003_t03
Ascaris	AgB06_g005_t04
Ascaris	AgB06_g016_t02
Ascaris	AgB06_g018_t01
Ascaris	AgB06_g019_t05
Ascaris	AgB06_g022_t03
Ascaris	AgB06_g023_t01
Ascaris	AgB06_g024_t01
Ascaris	AgB06_g026_t01
Ascaris	AgB06_g031_t01
Ascaris	AgB06_g033_t05
Ascaris	AgB06_g036_t01
Ascaris	AgB06_g037_t01
Ascaris	AgB06_g038_t04
Ascaris	AgB06_g040_t02
Ascaris	AgB06_g044_t01
Ascaris	AgB06_g047_t01
Ascaris	AgB06_g051_t01
Ascaris	AgB06_g055_t02
Ascaris	AgB06_g056_t02
Ascaris	AgB06_g057_t02
Ascaris	AgB06_g058_t02
Ascaris	AgB06_g059_t02
Ascaris	AgB06_g061_t03
Ascaris	AgB06_g063_t01
Ascaris	AgB06_g064_t01
Ascaris	AgB06_g067_t01
Ascaris	AgB06_g069_t01
Ascaris	AgB06_g074_t01
Ascaris	AgB06_g075_t03
Ascaris	AgB06_g076_t01
Ascaris	AgB06_g080_t01
Ascaris	AgB06_g083_t01
Ascaris	AgB06_g088_t01
Ascaris	AgB06_g094_t01
Ascaris	AgB06_g096_t03
Ascaris	AgB06_g097_t01
Ascaris	AgB06_g098_t01
Ascaris	AgB06_g100_t02
Ascaris	AgB06_g101_t01
Ascaris	AgB06_g104_t01
Ascaris	AgB06_g110_t01
Ascaris	AgB06_g111_t01
Ascaris	AgB06_g116_t01
Ascaris	AgB06_g118_t02
Ascaris	AgB06_g123_t01
Ascaris	AgB06_g128_t02
Ascaris	AgB06_g129_t01
Ascaris	AgB06_g130_t01
Ascaris	AgB06_g135_t01
Ascaris	AgB06_g139_t01
Ascaris	AgB06_g143_t03
Ascaris	AgB06_g150_t01
Ascaris	AgB06_g152_t01
Ascaris	AgB06_g157_t01
Ascaris	AgB06_g159_t01
Ascaris	AgB06_g165_t01
Ascaris	AgB06_g169_t01
Ascaris	AgB06_g170_t01
Ascaris	AgB06_g175_t01
Ascaris	AgB06_g179_t01
Ascaris	AgB06_g181_t01
Ascaris	AgB06_g183_t01
Ascaris	AgB06_g186_t01
Ascaris	AgB06_g187_t01
Ascaris	AgB06_g192_t01
Ascaris	AgB06_g195_t03
Ascaris	AgB06_g196_t03
Ascaris	AgB06_g198_t01
Ascaris	AgB06_g203_t01
Ascaris	AgB06_g212_t01
Ascaris	AgB06_g213_t01
Ascaris	AgB06_g217_t01
Ascaris	AgB06_g218_t01
Ascaris	AgB06_g219_t04
Ascaris	AgB06_g223_t01
Ascaris	AgB06_g224_t01
Ascaris	AgB06_g226_t02
Ascaris	AgB06_g228_t01
Ascaris	AgB06_g230_t01
Ascaris	AgB06_g233_t01
Ascaris	AgB06_g240_t01
Ascaris	AgB06_g241_t01
Ascaris	AgB06_g242_t01
Ascaris	AgB06_g245_t01
Ascaris	AgB06_g252_t01
Ascaris	AgB06_g255_t01
Ascaris	AgB06_g261_t03
Ascaris	AgB06_g268_t02
Ascaris	AgB06_g270_t01
Ascaris	AgB06_g271_t02
Ascaris	AgB06_g272_t02
Ascaris	AgB06_g273_t01
Ascaris	AgB06_g274_t01
Ascaris	AgB06_g275_t01
Ascaris	AgB06_g277_t04
Ascaris	AgB06_g278_t08
Ascaris	AgB06_g280_t01
Ascaris	AgB06_g282_t03
Ascaris	AgB06_g283_t05
Ascaris	AgB06_g284_t01
Ascaris	AgB06_g287_t01
Ascaris	AgB06_g303_t01
Ascaris	AgB06_g312_t01
Ascaris	AgB06_g313_t01
Ascaris	AgB06_g330_t01
Ascaris	AgB06_g331_t01
Ascaris	AgB06_g338_t01
Ascaris	AgB06_g341_t01
Ascaris	AgB06_g345_t01
Ascaris	AgB06_g350_t01
Ascaris	AgB06_g351_t01
Ascaris	AgB06_g354_t01
Ascaris	AgB06_g355_t01
Ascaris	AgB07_g001_t01
Ascaris	AgB07_g002_t01
Ascaris	AgB07_g004_t04
Ascaris	AgB07_g006_t01
Ascaris	AgB07_g009_t01
Ascaris	AgB07_g011_t01
Ascaris	AgB07_g012_t01
Ascaris	AgB07_g013_t01
Ascaris	AgB07_g014_t01
Ascaris	AgB07_g015_t01
Ascaris	AgB07_g026_t01
Ascaris	AgB07_g030_t01
Ascaris	AgB07_g034_t02
Ascaris	AgB07_g035_t03
Ascaris	AgB07_g040_t01
Ascaris	AgB07_g045_t01
Ascaris	AgB07_g046_t01
Ascaris	AgB07_g047_t02
Ascaris	AgB07_g049_t01
Ascaris	AgB07_g057_t01
Ascaris	AgB07_g063_t01
Ascaris	AgB07_g064_t01
Ascaris	AgB07_g065_t01
Ascaris	AgB07_g070_t01
Ascaris	AgB07_g077_t01
Ascaris	AgB07_g081_t01
Ascaris	AgB07_g083_t03
Ascaris	AgB07_g094_t01
Ascaris	AgB07_g095_t01
Ascaris	AgB07_g096_t03
Ascaris	AgB07_g098_t03
Ascaris	AgB07_g100_t01
Ascaris	AgB07_g104_t01
Ascaris	AgB07_g111_t04
Ascaris	AgB07_g116_t01
Ascaris	AgB07_g118_t01
Ascaris	AgB07_g121_t06
Ascaris	AgB07_g123_t01
Ascaris	AgB07_g126_t01
Ascaris	AgB07_g127_t01
Ascaris	AgB07_g129_t01
Ascaris	AgB07_g131_t03
Ascaris	AgB07_g133_t01
Ascaris	AgB07_g138_t01
Ascaris	AgB07_g143_t09
Ascaris	AgB07_g144_t01
Ascaris	AgB07_g147_t06
Ascaris	AgB07_g150_t01
Ascaris	AgB07_g151_t01
Ascaris	AgB07_g160_t01
Ascaris	AgB07_g161_t01
Ascaris	AgB07_g164_t01
Ascaris	AgB07_g168_t01
Ascaris	AgB07_g169_t01
Ascaris	AgB07_g174_t01
Ascaris	AgB07_g175_t01
Ascaris	AgB07_g176_t01
Ascaris	AgB07_g178_t01
Ascaris	AgB07_g182_t01
Ascaris	AgB07_g183_t01
Ascaris	AgB07_g184_t01
Ascaris	AgB07_g185_t01
Ascaris	AgB07_g191_t04
Ascaris	AgB07_g192_t01
Ascaris	AgB07_g196_t01
Ascaris	AgB07_g198_t01
Ascaris	AgB07_g203_t01
Ascaris	AgB07_g205_t01
Ascaris	AgB07_g206_t01
Ascaris	AgB07_g211_t01
Ascaris	AgB07_g213_t01
Ascaris	AgB07_g214_t01
Ascaris	AgB07_g216_t01
Ascaris	AgB07_g217_t01
Ascaris	AgB07_g221_t08
Ascaris	AgB07_g223_t01
Ascaris	AgB07_g224_t01
Ascaris	AgB07_g227_t01
Ascaris	AgB07_g231_t03
Ascaris	AgB07_g234_t01
Ascaris	AgB07_g238_t01
Ascaris	AgB07_g240_t01
Ascaris	AgB07_g241_t01
Ascaris	AgB07_g244_t02
Ascaris	AgB07_g245_t03
Ascaris	AgB07_g248_t02
Ascaris	AgB07_g250_t01
Ascaris	AgB07_g251_t01
Ascaris	AgB07_g252_t01
Ascaris	AgB07_g255_t01
Ascaris	AgB07_g257_t01
Ascaris	AgB07_g266_t01
Ascaris	AgB07_g267_t01
Ascaris	AgB07_g271_t01
Ascaris	AgB07_g275_t07
Ascaris	AgB07_g279_t01
Ascaris	AgB07_g281_t04
Ascaris	AgB07_g283_t01
Ascaris	AgB07_g286_t01
Ascaris	AgB07_g290_t01
Ascaris	AgB07_g292_t01
Ascaris	AgB07_g294_t01
Ascaris	AgB07_g297_t03
Ascaris	AgB07_g300_t03
Ascaris	AgB07_g302_t01
Ascaris	AgB07_g303_t01
Ascaris	AgB07_g304_t01
Ascaris	AgB07_g306_t01
Ascaris	AgB07_g310_t06
Ascaris	AgB07_g312_t02
Ascaris	AgB07_g313_t01
Ascaris	AgB07_g315_t02
Ascaris	AgB07_g317_t01
Ascaris	AgB08X_g002_t01
Ascaris	AgB08X_g004_t01
Ascaris	AgB08X_g007_t01
Ascaris	AgB08X_g011_t04
Ascaris	AgB08X_g013_t01
Ascaris	AgB08X_g014_t11
Ascaris	AgB08X_g025_t01
Ascaris	AgB08X_g026_t01
Ascaris	AgB08X_g028_t01
Ascaris	AgB08X_g029_t01
Ascaris	AgB08X_g035_t01
Ascaris	AgB08X_g038_t01
Ascaris	AgB08X_g044_t01
Ascaris	AgB08X_g049_t01
Ascaris	AgB08X_g050_t01
Ascaris	AgB08X_g057_t02
Ascaris	AgB08X_g066_t01
Ascaris	AgB08X_g067_t01
Ascaris	AgB08X_g068_t01
Ascaris	AgB08X_g075_t01
Ascaris	AgB08X_g080_t01
Ascaris	AgB08X_g081_t01
Ascaris	AgB08X_g082_t02
Ascaris	AgB08X_g086_t01
Ascaris	AgB08X_g088_t01
Ascaris	AgB08X_g090_t03
Ascaris	AgB08X_g091_t01
Ascaris	AgB08X_g096_t01
Ascaris	AgB08X_g097_t01
Ascaris	AgB08X_g100_t04
Ascaris	AgB08X_g105_t03
Ascaris	AgB08X_g106_t01
Ascaris	AgB08X_g120_t01
Ascaris	AgB08X_g123_t03
Ascaris	AgB08X_g124_t02
Ascaris	AgB08X_g127_t02
Ascaris	AgB08X_g140_t01
Ascaris	AgB08X_g147_t01
Ascaris	AgB08X_g148_t01
Ascaris	AgB08X_g150_t01
Ascaris	AgB08X_g151_t01
Ascaris	AgB08X_g156_t01
Ascaris	AgB08X_g158_t02
Ascaris	AgB08X_g163_t01
Ascaris	AgB08X_g165_t01
Ascaris	AgB08X_g166_t01
Ascaris	AgB08X_g173_t01
Ascaris	AgB08X_g177_t01
Ascaris	AgB08X_g179_t01
Ascaris	AgB08X_g181_t01
Ascaris	AgB08X_g182_t01
Ascaris	AgB08X_g183_t01
Ascaris	AgB08X_g195_t01
Ascaris	AgB08X_g198_t02
Ascaris	AgB08X_g200_t01
Ascaris	AgB08X_g205_t02
Ascaris	AgB08X_g212_t01
Ascaris	AgB08X_g221_t01
Ascaris	AgB08X_g228_t01
Ascaris	AgB08X_g229_t01
Ascaris	AgB08X_g232_t01
Ascaris	AgB08X_g233_t01
Ascaris	AgB08X_g234_t01
Ascaris	AgB08X_g235_t01
Ascaris	AgB08X_g238_t01
Ascaris	AgB08X_g240_t01
Ascaris	AgB08X_g242_t01
Ascaris	AgB08X_g244_t01
Ascaris	AgB08X_g245_t01
Ascaris	AgB08X_g246_t01
Ascaris	AgB08X_g248_t08
Ascaris	AgB08X_g249_t04
Ascaris	AgB08X_g250_t01
Ascaris	AgB08X_g252_t01
Ascaris	AgB08X_g256_t01
Ascaris	AgB08X_g257_t01
Ascaris	AgB08X_g260_t01
Ascaris	AgB08X_g261_t01
Ascaris	AgB08X_g266_t06
Ascaris	AgB08X_g268_t01
Ascaris	AgB08X_g271_t01
Ascaris	AgB08X_g275_t01
Ascaris	AgB08X_g277_t01
Ascaris	AgB08X_g283_t01
Ascaris	AgB08X_g286_t01
Ascaris	AgB08X_g288_t03
Ascaris	AgB08X_g290_t02
Ascaris	AgB08X_g291_t01
Ascaris	AgB08X_g292_t10
Ascaris	AgB08X_g293_t01
Ascaris	AgB08X_g295_t02
Ascaris	AgB09X_g002_t01
Ascaris	AgB09X_g003_t02
Ascaris	AgB09X_g004_t01
Ascaris	AgB09X_g008_t01
Ascaris	AgB09X_g009_t01
Ascaris	AgB09X_g011_t07
Ascaris	AgB09X_g012_t05
Ascaris	AgB09X_g014_t01
Ascaris	AgB09X_g016_t01
Ascaris	AgB09X_g017_t01
Ascaris	AgB09X_g022_t01
Ascaris	AgB09X_g023_t03
Ascaris	AgB09X_g028_t01
Ascaris	AgB09X_g029_t01
Ascaris	AgB09X_g034_t08
Ascaris	AgB09X_g040_t01
Ascaris	AgB09X_g041_t01
Ascaris	AgB09X_g052_t02
Ascaris	AgB09X_g061_t01
Ascaris	AgB09X_g064_t01
Ascaris	AgB09X_g066_t01
Ascaris	AgB09X_g070_t04
Ascaris	AgB09X_g071_t01
Ascaris	AgB09X_g073_t01
Ascaris	AgB09X_g077_t01
Ascaris	AgB09X_g078_t04
Ascaris	AgB09X_g080_t01
Ascaris	AgB09X_g085_t01
Ascaris	AgB09X_g093_t01
Ascaris	AgB09X_g094_t01
Ascaris	AgB09X_g095_t01
Ascaris	AgB09X_g099_t03
Ascaris	AgB09X_g103_t01
Ascaris	AgB09X_g104_t01
Ascaris	AgB09X_g107_t03
Ascaris	AgB09X_g108_t01
Ascaris	AgB09X_g109_t01
Ascaris	AgB09X_g114_t02
Ascaris	AgB09X_g116_t01
Ascaris	AgB09X_g121_t01
Ascaris	AgB09X_g129_t07
Ascaris	AgB09X_g132_t01
Ascaris	AgB09X_g135_t01
Ascaris	AgB09X_g139_t01
Ascaris	AgB09X_g143_t01
Ascaris	AgB09X_g145_t02
Ascaris	AgB09X_g152_t01
Ascaris	AgB09X_g153_t01
Ascaris	AgB09X_g154_t02
Ascaris	AgB09X_g155_t01
Ascaris	AgB10_g006_t01
Ascaris	AgB10_g013_t01
Ascaris	AgB10_g025_t02
Ascaris	AgB10_g027_t01
Ascaris	AgB10_g030_t04
Ascaris	AgB10_g033_t01
Ascaris	AgB10_g035_t09
Ascaris	AgB10_g038_t01
Ascaris	AgB10_g039_t02
Ascaris	AgB10_g042_t01
Ascaris	AgB10_g044_t01
Ascaris	AgB10_g046_t01
Ascaris	AgB10_g048_t01
Ascaris	AgB10_g050_t01
Ascaris	AgB10_g052_t01
Ascaris	AgB10_g063_t01
Ascaris	AgB10_g065_t02
Ascaris	AgB10_g070_t01
Ascaris	AgB10_g072_t01
Ascaris	AgB10_g075_t01
Ascaris	AgB10_g076_t01
Ascaris	AgB10_g082_t02
Ascaris	AgB10_g084_t01
Ascaris	AgB10_g088_t01
Ascaris	AgB10_g091_t01
Ascaris	AgB10_g096_t01
Ascaris	AgB10_g099_t01
Ascaris	AgB10_g104_t01
Ascaris	AgB10_g107_t01
Ascaris	AgB10_g108_t03
Ascaris	AgB10_g110_t01
Ascaris	AgB10_g114_t01
Ascaris	AgB10_g117_t09
Ascaris	AgB10_g118_t01
Ascaris	AgB10_g119_t02
Ascaris	AgB10_g121_t01
Ascaris	AgB10_g122_t01
Ascaris	AgB10_g125_t05
Ascaris	AgB10_g130_t01
Ascaris	AgB10_g133_t01
Ascaris	AgB10_g134_t02
Ascaris	AgB10_g139_t03
Ascaris	AgB10_g141_t02
Ascaris	AgB10_g145_t01
Ascaris	AgB10_g146_t01
Ascaris	AgB10_g147_t01
Ascaris	AgB10_g148_t01
Ascaris	AgB10_g149_t02
Ascaris	AgB10_g150_t01
Ascaris	AgB10_g151_t01
Ascaris	AgB10_g152_t04
Ascaris	AgB10_g154_t01
Ascaris	AgB10_g156_t01
Ascaris	AgB10_g157_t01
Ascaris	AgB10_g161_t01
Ascaris	AgB10_g166_t01
Ascaris	AgB10_g169_t01
Ascaris	AgB10_g170_t02
Ascaris	AgB10_g173_t01
Ascaris	AgB10_g176_t02
Ascaris	AgB10_g181_t01
Ascaris	AgB10_g182_t01
Ascaris	AgB10_g183_t02
Ascaris	AgB10_g184_t01
Ascaris	AgB10_g187_t01
Ascaris	AgB10_g190_t02
Ascaris	AgB10_g194_t01
Ascaris	AgB10_g196_t01
Ascaris	AgB10_g197_t01
Ascaris	AgB10_g198_t01
Ascaris	AgB10_g201_t03
Ascaris	AgB10_g202_t02
Ascaris	AgB10_g203_t03
Ascaris	AgB11_g001_t02
Ascaris	AgB11_g012_t01
Ascaris	AgB11_g014_t01
Ascaris	AgB11_g023_t01
Ascaris	AgB11_g024_t01
Ascaris	AgB11_g026_t01
Ascaris	AgB11_g028_t01
Ascaris	AgB11_g029_t05
Ascaris	AgB11_g034_t01
Ascaris	AgB11_g035_t01
Ascaris	AgB11_g037_t02
Ascaris	AgB11_g039_t01
Ascaris	AgB11_g040_t02
Ascaris	AgB11_g042_t01
Ascaris	AgB11_g053_t01
Ascaris	AgB11_g055_t01
Ascaris	AgB11_g062_t01
Ascaris	AgB11_g066_t01
Ascaris	AgB11_g073_t01
Ascaris	AgB11_g074_t01
Ascaris	AgB11_g078_t01
Ascaris	AgB11_g079_t01
Ascaris	AgB11_g080_t07
Ascaris	AgB11_g081_t01
Ascaris	AgB11_g088_t01
Ascaris	AgB11_g098_t01
Ascaris	AgB11_g103_t01
Ascaris	AgB11_g112_t01
Ascaris	AgB11_g113_t01
Ascaris	AgB11_g114_t01
Ascaris	AgB11_g120_t02
Ascaris	AgB11_g125_t02
Ascaris	AgB11_g129_t02
Ascaris	AgB11_g131_t01
Ascaris	AgB11_g133_t01
Ascaris	AgB11_g134_t02
Ascaris	AgB11_g145_t01
Ascaris	AgB11_g154_t01
Ascaris	AgB11_g155_t03
Ascaris	AgB11_g158_t01
Ascaris	AgB11_g159_t02
Ascaris	AgB11_g161_t01
Ascaris	AgB11_g163_t01
Ascaris	AgB11_g167_t01
Ascaris	AgB12_g005_t01
Ascaris	AgB12_g006_t01
Ascaris	AgB12_g009_t01
Ascaris	AgB12_g017_t01
Ascaris	AgB12_g018_t01
Ascaris	AgB12_g026_t01
Ascaris	AgB12_g032_t02
Ascaris	AgB12_g035_t01
Ascaris	AgB12_g039_t01
Ascaris	AgB12_g043_t01
Ascaris	AgB12_g044_t01
Ascaris	AgB12_g046_t04
Ascaris	AgB12_g050_t03
Ascaris	AgB12_g053_t01
Ascaris	AgB12_g055_t01
Ascaris	AgB12_g061_t01
Ascaris	AgB12_g063_t01
Ascaris	AgB12_g064_t01
Ascaris	AgB12_g072_t01
Ascaris	AgB12_g075_t01
Ascaris	AgB12_g076_t01
Ascaris	AgB12_g081_t01
Ascaris	AgB12_g083_t01
Ascaris	AgB12_g084_t02
Ascaris	AgB12_g086_t01
Ascaris	AgB12_g087_t03
Ascaris	AgB12_g088_t01
Ascaris	AgB12_g091_t01
Ascaris	AgB12_g102_t01
Ascaris	AgB12_g105_t04
Ascaris	AgB12_g107_t01
Ascaris	AgB12_g108_t01
Ascaris	AgB12_g109_t01
Ascaris	AgB12_g112_t01
Ascaris	AgB12_g116_t01
Ascaris	AgB12_g117_t03
Ascaris	AgB12_g120_t01
Ascaris	AgB12_g121_t01
Ascaris	AgB12_g123_t02
Ascaris	AgB12_g125_t01
Ascaris	AgB12_g128_t01
Ascaris	AgB12_g132_t02
Ascaris	AgB12_g133_t01
Ascaris	AgB12_g134_t01
Ascaris	AgB12_g136_t01
Ascaris	AgB13X_g001_t01
Ascaris	AgB13X_g002_t01
Ascaris	AgB13X_g004_t03
Ascaris	AgB13X_g006_t09
Ascaris	AgB13X_g007_t01
Ascaris	AgB13X_g008_t01
Ascaris	AgB13X_g010_t01
Ascaris	AgB13X_g011_t01
Ascaris	AgB13X_g012_t01
Ascaris	AgB13X_g013_t01
Ascaris	AgB13X_g014_t01
Ascaris	AgB13X_g015_t01
Ascaris	AgB13X_g021_t03
Ascaris	AgB13X_g022_t01
Ascaris	AgB13X_g026_t01
Ascaris	AgB13X_g030_t01
Ascaris	AgB13X_g033_t01
Ascaris	AgB13X_g045_t01
Ascaris	AgB13X_g047_t01
Ascaris	AgB13X_g049_t01
Ascaris	AgB13X_g053_t01
Ascaris	AgB13X_g057_t01
Ascaris	AgB13X_g058_t04
Ascaris	AgB13X_g063_t01
Ascaris	AgB13X_g067_t01
Ascaris	AgB13X_g071_t01
Ascaris	AgB13X_g072_t02
Ascaris	AgB13X_g073_t02
Ascaris	AgB13X_g077_t01
Ascaris	AgB13X_g080_t01
Ascaris	AgB13X_g081_t04
Ascaris	AgB13X_g083_t01
Ascaris	AgB13X_g093_t01
Ascaris	AgB13X_g095_t01
Ascaris	AgB13X_g098_t02
Ascaris	AgB13X_g099_t01
Ascaris	AgB13X_g101_t01
Ascaris	AgB13X_g102_t01
Ascaris	AgB13X_g103_t08
Ascaris	AgB14_g003_t05
Ascaris	AgB14_g005_t01
Ascaris	AgB14_g006_t01
Ascaris	AgB14_g011_t01
Ascaris	AgB14_g013_t01
Ascaris	AgB14_g016_t03
Ascaris	AgB14_g017_t02
Ascaris	AgB14_g021_t02
Ascaris	AgB14_g023_t01
Ascaris	AgB14_g024_t01
Ascaris	AgB14_g026_t01
Ascaris	AgB14_g027_t01
Ascaris	AgB14_g033_t01
Ascaris	AgB14_g038_t01
Ascaris	AgB14_g041_t01
Ascaris	AgB14_g042_t02
Ascaris	AgB14_g047_t01
Ascaris	AgB14_g050_t09
Ascaris	AgB14_g057_t01
Ascaris	AgB14_g058_t01
Ascaris	AgB14_g059_t01
Ascaris	AgB14_g060_t01
Ascaris	AgB14_g063_t01
Ascaris	AgB14_g065_t01
Ascaris	AgB14_g070_t01
Ascaris	AgB14_g073_t01
Ascaris	AgB14_g078_t01
Ascaris	AgB14_g080_t02
Ascaris	AgB14_g086_t01
Ascaris	AgB14_g087_t01
Ascaris	AgB14_g095_t03
Ascaris	AgB14_g101_t03
Ascaris	AgB14_g102_t01
Ascaris	AgB14_g105_t11
Ascaris	AgB14_g107_t02
Ascaris	AgB14_g111_t01
Ascaris	AgB14_g114_t01
Ascaris	AgB14_g115_t02
Ascaris	AgB14_g116_t01
Ascaris	AgB14_g117_t10
Ascaris	AgB14_g118_t01
Ascaris	AgB14_g120_t01
Ascaris	AgB14_g127_t01
Ascaris	AgB14_g129_t01
Ascaris	AgB14_g130_t01
Ascaris	AgB14_g134_t01
Ascaris	AgB14_g136_t01
Ascaris	AgB14_g139_t01
Ascaris	AgB14_g140_t02
Ascaris	AgB14_g141_t01
Ascaris	AgB15X_g005_t02
Ascaris	AgB15X_g008_t01
Ascaris	AgB15X_g017_t02
Ascaris	AgB15X_g019_t01
Ascaris	AgB15X_g020_t01
Ascaris	AgB15X_g023_t01
Ascaris	AgB15X_g027_t01
Ascaris	AgB15X_g028_t01
Ascaris	AgB15X_g031_t01
Ascaris	AgB15X_g035_t01
Ascaris	AgB15X_g040_t01
Ascaris	AgB15X_g041_t01
Ascaris	AgB15X_g052_t01
Ascaris	AgB15X_g054_t02
Ascaris	AgB15X_g057_t01
Ascaris	AgB15X_g064_t01
Ascaris	AgB15X_g065_t01
Ascaris	AgB15X_g066_t01
Ascaris	AgB15X_g071_t01
Ascaris	AgB15X_g072_t01
Ascaris	AgB15X_g073_t01
Ascaris	AgB15X_g079_t01
Ascaris	AgB15X_g083_t03
Ascaris	AgB15X_g089_t04
Ascaris	AgB15X_g090_t01
Ascaris	AgB15X_g092_t01
Ascaris	AgB15X_g095_t01
Ascaris	AgB15X_g096_t07
Ascaris	AgB15X_g097_t01
Ascaris	AgB15X_g105_t01
Ascaris	AgB15X_g107_t01
Ascaris	AgB15X_g108_t01
Ascaris	AgB15X_g114_t01
Ascaris	AgB15X_g117_t01
Ascaris	AgB15X_g120_t01
Ascaris	AgB15X_g125_t01
Ascaris	AgB15X_g126_t01
Ascaris	AgB15X_g135_t01
Ascaris	AgB15X_g136_t01
Ascaris	AgB15X_g137_t01
Ascaris	AgB16X_g003_t01
Ascaris	AgB16X_g004_t01
Ascaris	AgB16X_g006_t04
Ascaris	AgB16X_g012_t04
Ascaris	AgB16X_g013_t01
Ascaris	AgB16X_g015_t01
Ascaris	AgB16X_g017_t03
Ascaris	AgB16X_g018_t01
Ascaris	AgB16X_g021_t01
Ascaris	AgB16X_g023_t01
Ascaris	AgB16X_g026_t01
Ascaris	AgB16X_g028_t02
Ascaris	AgB16X_g034_t01
Ascaris	AgB16X_g036_t06
Ascaris	AgB16X_g038_t01
Ascaris	AgB16X_g040_t01
Ascaris	AgB16X_g041_t02
Ascaris	AgB16X_g042_t02
Ascaris	AgB16X_g045_t01
Ascaris	AgB16X_g050_t01
Ascaris	AgB16X_g051_t07
Ascaris	AgB16X_g052_t01
Ascaris	AgB16X_g055_t02
Ascaris	AgB16X_g056_t01
Ascaris	AgB16X_g057_t01
Ascaris	AgB16X_g059_t01
Ascaris	AgB16X_g062_t01
Ascaris	AgB16X_g070_t01
Ascaris	AgB16X_g074_t01
Ascaris	AgB16X_g076_t01
Ascaris	AgB16X_g077_t01
Ascaris	AgB16X_g078_t01
Ascaris	AgB16X_g079_t01
Ascaris	AgB16X_g080_t01
Ascaris	AgB16X_g082_t01
Ascaris	AgB16X_g088_t01
Ascaris	AgB16X_g092_t01
Ascaris	AgB16X_g093_t01
Ascaris	AgB16X_g094_t03
Ascaris	AgB16X_g095_t03
Ascaris	AgB17_g002_t01
Ascaris	AgB17_g007_t01
Ascaris	AgB17_g011_t01
Ascaris	AgB17_g012_t01
Ascaris	AgB17_g014_t01
Ascaris	AgB17_g018_t02
Ascaris	AgB17_g023_t02
Ascaris	AgB17_g024_t02
Ascaris	AgB17_g028_t01
Ascaris	AgB17_g031_t01
Ascaris	AgB17_g033_t05
Ascaris	AgB17_g034_t01
Ascaris	AgB17_g039_t01
Ascaris	AgB17_g042_t01
Ascaris	AgB17_g045_t01
Ascaris	AgB17_g048_t04
Ascaris	AgB17_g052_t01
Ascaris	AgB17_g053_t01
Ascaris	AgB17_g054_t01
Ascaris	AgB17_g056_t01
Ascaris	AgB17_g060_t01
Ascaris	AgB17_g066_t01
Ascaris	AgB17_g067_t01
Ascaris	AgB17_g069_t03
Ascaris	AgB17_g070_t02
Ascaris	AgB17_g074_t01
Ascaris	AgB17_g075_t02
Ascaris	AgB17_g079_t02
Ascaris	AgB17_g082_t01
Ascaris	AgB17_g089_t01
Ascaris	AgB17_g093_t02
Ascaris	AgB17_g094_t01
Ascaris	AgB17_g099_t02
Ascaris	AgB17_g101_t02
Ascaris	AgB17_g103_t01
Ascaris	AgB17_g104_t01
Ascaris	AgB17_g105_t12
Ascaris	AgB17_g107_t06
Ascaris	AgB17_g108_t01
Ascaris	AgB17_g109_t02
Ascaris	AgB17_g110_t01
Ascaris	AgB17_g111_t01
Ascaris	AgB17_g112_t01
Ascaris	AgB17_g113_t05
Ascaris	AgB18_g001_t05
Ascaris	AgB18_g002_t01
Ascaris	AgB18_g003_t01
Ascaris	AgB18_g004_t01
Ascaris	AgB18_g007_t01
Ascaris	AgB18_g011_t01
Ascaris	AgB18_g012_t01
Ascaris	AgB18_g015_t01
Ascaris	AgB18_g016_t01
Ascaris	AgB18_g018_t01
Ascaris	AgB18_g027_t01
Ascaris	AgB18_g037_t01
Ascaris	AgB18_g040_t01
Ascaris	AgB18_g042_t01
Ascaris	AgB18_g045_t01
Ascaris	AgB18_g048_t01
Ascaris	AgB18_g050_t01
Ascaris	AgB18_g053_t01
Ascaris	AgB18_g055_t01
Ascaris	AgB18_g060_t01
Ascaris	AgB18_g063_t01
Ascaris	AgB18_g064_t02
Ascaris	AgB18_g069_t01
Ascaris	AgB18_g074_t01
Ascaris	AgB18_g078_t02
Ascaris	AgB18_g082_t01
Ascaris	AgB18_g086_t01
Ascaris	AgB18_g087_t01
Ascaris	AgB18_g088_t03
Ascaris	AgB18_g089_t02
Ascaris	AgB18_g091_t02
Ascaris	AgB18_g098_t01
Ascaris	AgB18_g099_t01
Ascaris	AgB18_g105_t02
Ascaris	AgB18_g117_t01
Ascaris	AgB18_g120_t01
Ascaris	AgB19_g006_t01
Ascaris	AgB19_g007_t01
Ascaris	AgB19_g010_t05
Ascaris	AgB19_g011_t02
Ascaris	AgB19_g013_t02
Ascaris	AgB19_g015_t01
Ascaris	AgB19_g018_t01
Ascaris	AgB19_g022_t01
Ascaris	AgB19_g026_t01
Ascaris	AgB19_g028_t01
Ascaris	AgB19_g029_t01
Ascaris	AgB19_g030_t04
Ascaris	AgB19_g031_t02
Ascaris	AgB19_g035_t01
Ascaris	AgB19_g036_t02
Ascaris	AgB19_g038_t01
Ascaris	AgB19_g039_t01
Ascaris	AgB19_g043_t01
Ascaris	AgB19_g044_t01
Ascaris	AgB19_g050_t01
Ascaris	AgB19_g051_t05
Ascaris	AgB19_g053_t01
Ascaris	AgB19_g054_t01
Ascaris	AgB19_g062_t02
Ascaris	AgB19_g064_t01
Ascaris	AgB19_g072_t01
Ascaris	AgB19_g079_t01
Ascaris	AgB19_g080_t01
Ascaris	AgB19_g082_t01
Ascaris	AgB19_g085_t01
Ascaris	AgB19_g086_t01
Ascaris	AgB19_g089_t01
Ascaris	AgB19_g093_t01
Ascaris	AgB19_g097_t01
Ascaris	AgB19_g099_t01
Ascaris	AgB19_g100_t01
Ascaris	AgB19_g101_t01
Ascaris	AgB19_g103_t01
Ascaris	AgB20_g001_t01
Ascaris	AgB20_g004_t01
Ascaris	AgB20_g005_t01
Ascaris	AgB20_g007_t01
Ascaris	AgB20_g008_t07
Ascaris	AgB20_g010_t01
Ascaris	AgB20_g011_t01
Ascaris	AgB20_g013_t01
Ascaris	AgB20_g020_t01
Ascaris	AgB20_g022_t04
Ascaris	AgB20_g029_t01
Ascaris	AgB20_g030_t01
Ascaris	AgB20_g031_t01
Ascaris	AgB20_g033_t01
Ascaris	AgB20_g038_t06
Ascaris	AgB20_g043_t01
Ascaris	AgB20_g044_t02
Ascaris	AgB20_g046_t01
Ascaris	AgB20_g048_t04
Ascaris	AgB20_g049_t01
Ascaris	AgB20_g051_t01
Ascaris	AgB20_g052_t01
Ascaris	AgB20_g056_t01
Ascaris	AgB20_g057_t02
Ascaris	AgB20_g058_t02
Ascaris	AgB20_g064_t01
Ascaris	AgB20_g070_t01
Ascaris	AgB21_g001_t02
Ascaris	AgB21_g004_t01
Ascaris	AgB21_g005_t01
Ascaris	AgB21_g006_t03
Ascaris	AgB21_g010_t01
Ascaris	AgB21_g018_t01
Ascaris	AgB21_g025_t01
Ascaris	AgB21_g032_t01
Ascaris	AgB21_g034_t01
Ascaris	AgB21_g035_t01
Ascaris	AgB21_g036_t01
Ascaris	AgB21_g040_t02
Ascaris	AgB21_g042_t01
Ascaris	AgB21_g045_t01
Ascaris	AgB21_g050_t02
Ascaris	AgB21_g054_t01
Ascaris	AgB21_g057_t04
Ascaris	AgB21_g058_t01
Ascaris	AgB21_g065_t01
Ascaris	AgB21_g069_t01
Ascaris	AgB21_g071_t01
Ascaris	AgB21_g077_t02
Ascaris	AgB21_g083_t01
Ascaris	AgB21_g084_t02
Ascaris	AgB21_g085_t02
Ascaris	AgB21_g086_t08
Ascaris	AgB22X_g001_t01
Ascaris	AgB22X_g002_t01
Ascaris	AgB22X_g003_t04
Ascaris	AgB22X_g006_t01
Ascaris	AgB22X_g011_t04
Ascaris	AgB22X_g015_t01
Ascaris	AgB22X_g021_t01
Ascaris	AgB22X_g023_t01
Ascaris	AgB22X_g024_t01
Ascaris	AgB22X_g029_t02
Ascaris	AgB22X_g031_t01
Ascaris	AgB22X_g038_t01
Ascaris	AgB22X_g048_t01
Ascaris	AgB22X_g049_t01
Ascaris	AgB22X_g051_t04
Ascaris	AgB23_g001_t01
Ascaris	AgB23_g014_t03
Ascaris	AgB23_g018_t02
Ascaris	AgB23_g019_t01
Ascaris	AgB23_g020_t01
Ascaris	AgB23_g025_t01
Ascaris	AgB23_g032_t01
Ascaris	AgB23_g035_t01
Ascaris	AgB23_g036_t01
Ascaris	AgB23_g037_t01
Ascaris	AgB23_g041_t01
Ascaris	AgB23_g044_t01
Ascaris	AgB23_g045_t01
Ascaris	AgB23_g051_t01
Ascaris	AgB23_g052_t01
Ascaris	AgB23_g053_t02
Ascaris	AgB23_g057_t01
Ascaris	AgB23_g058_t01
Ascaris	AgB23_g063_t01
Ascaris	AgB23_g065_t01
Ascaris	AgB23_g066_t02
Ascaris	AgB23_g068_t09
Ascaris	AgB23_g069_t01
Ascaris	AgB23_g080_t01
Ascaris	AgB23_g081_t02
Ascaris	AgB23_g082_t01
Ascaris	AgB24_g001_t01
Ascaris	AgB24_g002_t02
Ascaris	AgB24_g006_t02
Ascaris	AgB24_g022_t02
Ascaris	AgB24_g025_t01
Ascaris	AgB24_g038_t01
Ascaris	AgB24_g041_t01
Ascaris	AgB24_g043_t01
Ascaris	AgB24_g045_t01
Ascaris	AgB24_g047_t01
Ascaris	AgB24_g054_t02
Ascaris	AgB25_g012_t02
Ascaris	AgB25_g013_t01
Ascaris	AgB25_g014_t01
Ascaris	AgB25_g020_t01
Ascaris	AgB25_g021_t08
Ascaris	AgB25_g024_t01
Ascaris	AgB25_g027_t03
Ascaris	AgB26_g002_t01
Ascaris	AgB26_g009_t01
Ascaris	AgB26_g010_t01
Ascaris	AgB26_g013_t01
Ascaris	AgB26_g014_t01
Ascaris	AgB26_g015_t01
Ascaris	AgB26_g016_t01
Ascaris	AgB26_g021_t01
Ascaris	AgB26_g024_t01
Ascaris	AgB26_g025_t01
Ascaris	AgB26_g028_t01
Ascaris	AgB27X_g003_t01
Ascaris	AgB27X_g005_t01
Ascaris	AgB27X_g008_t01
Ascaris	AgB27X_g011_t01
Ascaris	AgB27X_g017_t01
Ascaris	AgB27X_g021_t05
Ascaris	AgB27X_g022_t01
Ascaris	AgB27X_g023_t01
Ascaris	AgB28X_g001_t01
Ascaris	AgB28X_g002_t01
Ascaris	AgB28X_g004_t05
Ascaris	AgB28X_g005_t01
Ascaris	AgB28X_g007_t01
Ascaris	AgB28X_g008_t02
Ascaris	AgB28X_g012_t01
Ascaris	AgB28X_g014_t01
Ascaris	AgB28X_g015_t01
Ascaris	AgB28X_g017_t01
Ascaris	AgB28X_g018_t01
Ascaris	AgB28X_g021_t03
Ascaris	AgB28X_g024_t01
Ascaris	AgB28X_g026_t01
Ascaris	AgB28X_g027_t01
Ascaris	AgB29_g005_t02
Ascaris	AgB29_g007_t01
Ascaris	AgB29_g008_t01
Ascaris	AgB29_g010_t04
Ascaris	AgB29_g013_t01
Ascaris	AgB29_g014_t01
Ascaris	AgB29_g015_t05
Ascaris	AgB29_g019_t07
Ascaris	AgB29_g020_t02
Ascaris	AgB29_g021_t02
Ascaris	AgB30_g007_t02
Ascaris	AgB30_g008_t01
Ascaris	AgB30_g009_t01
Ascaris	AgB30_g010_t01
Ascaris	AgB31X_g001_t03
Ascaris	AgB31X_g002_t02
Ascaris	AgB31X_g004_t01
Ascaris	AgB31X_g006_t01
Ascaris	AgB31X_g007_t01
Ascaris	AgB31X_g009_t01
Ascaris	AgB31X_g011_t01
Ascaris	AgB31X_g012_t01
Ascaris	AgB31X_g013_t04
Ascaris	AgB32_g001_t01
Ascaris	AgB33_g003_t01
Ascaris	AgB33_g006_t01
Ascaris	AgB34_g002_t01
Ascaris	AgB34_g003_t01
Ascaris	AgB34_g004_t01
Ascaris	AgB35X_g002_t01
Ascaris	AgB36X_g001_t01
Ascaris	AgB36X_g002_t01
Ascaris	AgB36X_g004_t05
Ascaris	AgE01_g003_t01
Ascaris	AgE01_g008_t02
Ascaris	AgE01_g012_t01
Ascaris	AgE01_g013_t03
Ascaris	AgE01_g015_t01
Ascaris	AgE01_g016_t01
Ascaris	AgE01_g018_t05
Ascaris	AgE01_g025_t01
Ascaris	AgE01_g029_t01
Ascaris	AgE01_g031_t01
Ascaris	AgE01_g032_t01
Ascaris	AgE01_g034_t01
Ascaris	AgE01_g036_t01
Ascaris	AgE01_g041_t02
Ascaris	AgE01_g044_t01
Ascaris	AgE01_g045_t01
Ascaris	AgE01_g046_t01
Ascaris	AgE01_g047_t02
Ascaris	AgE01_g049_t01
Ascaris	AgE01_g054_t02
Ascaris	AgE01_g055_t01
Ascaris	AgE01_g064_t01
Ascaris	AgE02_g001_t01
Ascaris	AgE02_g008_t05
Ascaris	AgE02_g009_t05
Ascaris	AgE02_g016_t01
Ascaris	AgE02_g018_t01
Ascaris	AgE02_g021_t01
Ascaris	AgE02_g023_t01
Ascaris	AgE02_g025_t01
Ascaris	AgE02_g026_t03
Ascaris	AgE02_g027_t05
Ascaris	AgE02_g030_t01
Ascaris	AgE02_g031_t01
Ascaris	AgE02_g033_t08
Ascaris	AgE02_g035_t01
Ascaris	AgE02_g036_t01
Ascaris	AgE02_g041_t03
Ascaris	AgE03_g001_t23
Ascaris	AgE03_g002_t01
Ascaris	AgE03_g003_t01
Ascaris	AgE03_g004_t01
Ascaris	AgE03_g005_t01
Ascaris	AgE03_g006_t01
Ascaris	AgE03_g007_t01
Ascaris	AgE03_g008_t02
Ascaris	AgE03_g010_t03
Ascaris	AgE03_g014_t01
Ascaris	AgE03_g015_t02
Ascaris	AgE03_g018_t01
[truncated: 19,317 more rows]

## Sheet: summary
Ascaris	Parascaris	Toxocara	C. elegans	# of Orthologous Group	# of Singletons	Total Number	Description of genes in nematodes
Yes	Yes	Yes	Yes	5417	NA	5417	Present in all four nematodes
Yes	Yes	Yes	No	2623	NA	2623	Not in C. elegans but in all other three parasitic nematods
Yes	Yes	No	Yes	202	NA	202	Not in Toxocara but in others
Yes	No	Yes	Yes	543	NA	543	Not in Parascaris but in others
No	Yes	Yes	Yes	645	NA	645	Not in Ascaris but in others
Yes	Yes	No	No	780	NA	780	Only in Ascaris and Parascaris
Yes	No	Yes	No	701	NA	701	Only in Ascaris and Toxocara
Yes	No	No	Yes	61	NA	61	Only in Ascaris and C. elegans
No	Yes	Yes	No	467	NA	467	Only in Parascaris and Toxocara
No	Yes	No	Yes	57	NA	57	Only in Parascaris and C. elegans
No	No	Yes	Yes	339	NA	339	Only in Toxocara and C. elegans
Yes	No	No	No	199	6212	6411	Unique to Ascaris
No	Yes	No	No	117	3719	3836	Unique to Parascaris
No	No	Yes	No	286	5847	6133	Unique to Toxocara
No	No	No	Yes	1222	5537	6759	Unique to C. elegans
Orthologous groups: 13,659
Singletons: 21,315
