# Supplementary material for: Comparative genome analysis of programmed DNA elimination in nematodes
Source: HighWire-hosted journal article supplement (doi:10.1101/gr.225730.117), 2017-11-08
Supplement: Supplemental_Table_S10.xlsx [file Supplemental_Table_S10.xlsx]

## Sheet: CBRs in Ascaris
Chr	Start	End	Name	Density Center	Strand	Observed CBR size
AgB01	13268287	13272430	break_a01	13269408	+	4143
AgB02	4848727	4852390	break_a02	4850428	+	3663
AgB02	4932388	4933639	break_a03	4933013	-	1251
AgB02	8058882	8063588	break_a04	8060644	+	4706
AgB02	8325386	8329447	break_a05	8326154	-	4061
AgB03	169407	172248	break_a06	171049	-	2841
AgB04	7925554	7929486	break_a07	7926866	+	3932
AgB05	7779849	7783893	break_a08	7782031	+	4044
AgB06	86691	90916	break_a09	89171	-	4225
AgB07	31026	34839	break_a10	32600	+	3813
AgB07	84366	88401	break_a11	85891	-	4035
AgB08X	15022	18984	break_a12	16580	-	3962
AgB09X	3178521	3179426	break_a13	3178973	+	905
AgB10	76870	80453	break_a14	78392	-	3583
AgB11	43648	46064	break_a15	44686	-	2416
AgB12	34816	38467	break_a16	36232	-	3651
AgB13X	2257327	2260632	break_a17	2258741	+	3305
AgB14	86145	91097	break_a18	88084	-	4952
AgB15X	61803	65753	break_a19	63498	-	3950
AgB16X	77381	80419	break_a20	78923	-	3038
AgB17	1472350	1475918	break_a21	1473758	+	3568
AgB18	80163	80762	break_a22	80462	-	599
AgB19	9327	13192	break_a23	10799	-	3865
AgB20	166389	170865	break_a24	168455	-	4476
AgB21	64511	68219	break_a25	65789	-	3708
AgB22X	37399	40143	break_a26	38629	-	2744
AgB23	1075420	1079040	break_a27	1076795	+	3620
AgB24	84428	88693	break_a28	86282	-	4265
AgB25	477155	483895	break_a29	480516	+	6740
AgB26	22871	26036	break_a30	24776	-	3165
AgB27X	341407	344274	break_a31	342871	+	2867
AgB28X	59802	65098	break_a32	62175	+	5296
AgB29	259064	262068	break_a33	260271	-	3004
AgB30	21708	26541	break_a34	22966	-	4833
AgB31X	116395	119469	break_a35	118079	-	3074
AgB32	89566	94338	break_a36	92066	-	4772
AgB33	86839	89835	break_a37	88248	+	2996
AgB34	75092	78775	break_a38	76479	-	3683
AgB35X	14623	18110	break_a39	15867	+	3487
AgB36X	18519	22731	break_a40	19778	+	4212

## Sheet: CBRs in Parascaris
Chr	Start	End	Name	Density Center	Strand	Observed CBR size
PgB01	4160548	4161606	break01	4161076	+	1058
PgB02X	3501962	3508079	break02	3504123	+	6117
PgB03	3284490	3289999	break03	3285758	+	5509
PgB04	2906297	2911319	break04	2909094	+	5022
PgB05	2833804	2837732	break05	2835459	+	3928
PgB06	2068699	2073427	break06	2070486	+	4728
PgB07	1874619	1880021	break07	1876199	+	5402
PgB08	1702132	1705458	break08	1703422	+	3326
PgB09	1662226	1667999	break09	1665381	+	5773
PgB10	1561035	1565152	break10	1562797	+	4117
PgB11	1366141	1372831	break11	1368689	+	6690
PgB12X	1362736	1367600	break12	1365342	+	4864
PgB13	1337928	1342418	break13	1339708	+	4490
PgB14X	1193508	1198016	break14	1195539	+	4508
PgB15	1046869	1051846	break15	1050013	+	4977
PgB16	1023642	1027575	break16	1025594	+	3933
PgB17	976242	981175	break17	978393	+	4933
PgB18	889675	894137	break18	890971	+	4462
PgB19	777241	782331	break19	779968	+	5090
PgB20	775418	779222	break20	776850	+	3804
PgB21	633931	638124	break21	635715	+	4193
PgB22	552226	557472	break22	554076	+	5246
PgB23	520026	524234	break23	523251	+	4208
PgB24X	488209	492753	break24	490027	+	4544
PgB25	337026	342569	break25	339400	+	5543
PgB26	354255	359445	break26	356306	+	5190
PgB27X	295798	300727	break27	297693	+	4929
PgB28	232296	236591	break28	233898	+	4295
PgB29	271094	276517	break29	273533	+	5423
PgB30	206206	212753	break30	210716	+	6547
PgB31	198742	201985	break31	200805	+	3243
PgB32	104177	107471	break32	105655	+	3294
PgB33	57669	62086	break33	59991	+	4417
PgB34	27747	33448	break34	29942	+	5701
PgB35	96174	102035	break35	98450	+	5861
PgB36X	42014	48827	break36	44563	+	6813
PgB37	47875	51708	break37	49823	+	3833
PgB38	67369	70997	break38	69151	+	3628
PgB39	52567	59780	break39	55349	+	7213
PgB40X	53602	60287	break40	55412	+	6685
PgB41X	34453	39132	break41	36368	+	4679
PgB42	67108	71068	break42	68193	+	3960
PgB43	40764	47843	break43	42917	+	7079
PgB44	26002	29843	break44	27511	+	3841
PgB45	5340	11082	break45	7414	+	5742
PgB46	11709	15318	break46	13302	+	3609

## Sheet: CBRs in Toxocara
Chr	Start	End	Name	Density Center*	Strand
Tg0004	37966	47966	break_t01	42966	-
Tg0006	1297678	1307678	break_t02	1302678	+
Tg0006	1337727	1347727	break_t03	1342727	-
Tg0013	36185	46185	break_t04	41185	-
Tg0014	60083	70083	break_t05	65083	-
Tg0017	1448033	1458033	break_t06	1453033	+
Tg0024	27311	37311	break_t07	32311	-
Tg0027	34117	44117	break_t08	39117	-
Tg0035	58928	68928	break_t09	63928	-
Tg0054	936587	946587	break_t10	941587	+
Tg0074	7418	17418	break_t11	12418	-
Tg0079	742186	752186	break_t12	747186	+
Tg0128	506310	516310	break_t13	511310	+
Tg0143	53021	63021	break_t14	58021	-
Tg0163	465855	475855	break_t15	470855	+
Tg0208	222770	232770	break_t16	227770	-
Tg0306	294642	304642	break_t17	299642	+
Tg0315	255046	265046	break_t18	260046	+
Tg0328	221345	231345	break_t19	226345	+
Tg0369	37578	47578	break_t20	42578	-
Tg0377	191859	201859	break_t21	196859	+
Tg0392	136210	146210	break_t22	141210	+
Tg0409	40298	50298	break_t23	45298	-
Tg0424	38045	48045	break_t24	43045	+
Tg0444	18338	28338	break_t25	23338	-
Tg0455	51583	61583	break_t26	56583	-
Tg0527	117492	127492	break_t27	122492	+
Tg0535	236	10236	break_t28	5236	-
Tg0562	66242	76242	break_t29	71242	+
Tg0563	4502	14502	break_t30	9502	-
Tg0590	55746	65746	break_t31	60746	+
Tg0702	44844	54844	break_t32	49844	-
* based on limited data (not from population); CBRs defined as 5 kb flanking regions

## Sheet: CBRs comparison in 3 nematodes
Ascaris chr	Ascaris break ID	Parascaris chr	Parascaris break ID	Toxocara chr	Toxocara break ID	HSPs # (Ag vs. Pg)*	HSPs # (Ag vs. Tg)*	HSPs # (Pg vs Tg)*	Note	CBR ID **
AgB24	break_a28	PgB38	break_p38	-	-	354
AgB06	break_a09	PgB03	break_p03	-	-	348
AgB32	break_a36	PgB45	break_p45	-	-	312
AgB33	break_a37	PgB25	break_p25	-	-	310
AgB07	break_a10	PgB07	break_p07	-	-	296
AgB02	break_a02	PgB32	break_p32	-	-	295
AgB26	break_a30	PgB23	break_p23	-	-	291			repeat1
AgB18	break_a22	PgB34	break_p34	-	-	280
AgB30	break_a34	PgB08	break_p08	-	-	280
AgB29	break_a33	PgB23	break_p23	-	-	276			repeat1
AgB12	break_a16	PgB18	break_p18	Tg0563	break_t30	271	14		repeat2
AgB04	break_a07	PgB17	break_p17	-	-	235
AgB10	break_a14	PgB43	break_p43	-	-	222
AgB35X	break_a39	PgB13	break_p13	-	-	204
AgB17	break_a21	PgB05	break_p05	-	-	193
AgB28X	break_a32	PgB27X	break_p27	-	-	150				CBR2
AgB23	break_a27	PgB16	break_p16	-	-	140
AgB14	break_a18	PgB41X	break_p41	-	-	125
AgB01	break_a01	PgB35	break_p35	-	-	111
AgB25	break_a29	PgB31	break_p31	-	-	109				CBR7
AgB31X	break_a35	PgB09	break_p09	-	-	109
AgB21	break_a25	PgB10	break_p10	-	-	99
AgB11	break_a15	PgB18	break_p18	-	-	66			repeat2
AgB07	break_a11	PgB14X	break_p14	-	-	49
AgB09X	break_a13	PgB44	break_p44	Tg0027; Tg0074; Tg0163	break_t08; break_t11; break_t15	24	45; 45; 44	20; 15; 12	repeat3
AgB19	break_a23	PgB01	break_p01	-	-	18
AgB34	break_a38	PgB37	break_p37	-	-	18
AgB08X	break_a12	PgB15	break_p15	-	-	13
AgB02	break_a03	-	-	-	-
AgB02	break_a04	-	-	-	-
AgB02	break_a05	-	-	-	-
AgB03	break_a06	-	-	-	-
AgB05	break_a08	-	-	-	-
AgB13X	break_a17	-	-	-	-
AgB15X	break_a19	-	-	-	-
AgB16X	break_a20	-	-	-	-					CBR3
AgB20	break_a24	-	-	-	-
AgB22X	break_a26	-	-	-	-					CBR1
AgB27X	break_a31	-	-	-	-					CBR18
AgB36X	break_a40	-	-	-	-
-	-	PgB02X	break_p02	-	-
-	-	PgB04	break_p04	-	-
-	-	PgB06	break_p06	-	-
-	-	PgB11	break_p11	-	-
-	-	PgB12X	break_p12	-	-
-	-	PgB19	break_p19	-	-
-	-	PgB20	break_p20	-	-
-	-	PgB21	break_p21	-	-
-	-	PgB22	break_p22	-	-
-	-	PgB24X	break_p24	-	-
-	-	PgB26	break_p26	-	-					CBR21
-	-	PgB28	break_p28	-	-
-	-	PgB29	break_p29	-	-
-	-	PgB30	break_p30	-	-
-	-	PgB33	break_p33	-	-
-	-	PgB36X	break_p36	-	-
-	-	PgB39	break_p39	-	-
-	-	PgB40X	break_p40	-	-
-	-	PgB42	break_p42	-	-
-	-	PgB46	break_p46	-	-
-	-	-	-	Tg0004	break_t01
-	-	-	-	Tg0006	break_t02
-	-	-	-	Tg0006	break_t03
-	-	-	-	Tg0013	break_t04
-	-	-	-	Tg0014	break_t05
-	-	-	-	Tg0017	break_t06
-	-	-	-	Tg0024	break_t07
-	-	-	-	Tg0035	break_t09
-	-	-	-	Tg0054	break_t10
-	-	-	-	Tg0079	break_t12
-	-	-	-	Tg0128	break_t13
-	-	-	-	Tg0143	break_t14
-	-	-	-	Tg0208	break_t16
-	-	-	-	Tg0306	break_t17
-	-	-	-	Tg0315	break_t18
-	-	-	-	Tg0328	break_t19
-	-	-	-	Tg0369	break_t20
-	-	-	-	Tg0377	break_t21
-	-	-	-	Tg0392	break_t22
-	-	-	-	Tg0409	break_t23
-	-	-	-	Tg0424	break_t24
-	-	-	-	Tg0444	break_t25
-	-	-	-	Tg0455	break_t26
-	-	-	-	Tg0527	break_t27
-	-	-	-	Tg0535	break_t28
-	-	-	-	Tg0562	break_t29
-	-	-	-	Tg0590	break_t31
-	-	-	-	Tg0702	break_t32
*: # of High- scoring Segment Pairs (HSPs) for tblastx search for 10kb flanking regions around the break density center (Ag: Ascaris, Pg: Parascaris, Tg: Toxocara; cutoff HSPs >= 10)
**: CBR = chromosomal breakage region. From Bachmann-Waldmann, C., et al., Molecular and biochemical parasitology, 2004. 134(1): p. 53-64.

## Sheet: Ascaris CBR SNP and indel rate
	Mixed sample		Individual sample
Regions in the genome	SNP	INDEL	SNP	INDEL
Chromosomal Breakage Regions	0.0157	0.0022	0.00898	0.001098
Exons	0.0128	0.0014	0.005368	0.000604
Genes	0.0145	0.0019	0.005953	0.000782
Whole genome	0.0139	0.0018	0.005722	0.000763
