# Supplementary material for: Comparative genome analysis of programmed DNA elimination in nematodes
Source: HighWire-hosted journal article supplement (doi:10.1101/gr.225730.117), 2017-11-08
Supplement: Supplemental_Table_S11.xlsx [file Supplemental_Table_S11.xlsx]

## Sheet: Ascaris
Chromosome	Start	End	Transcript_name	Strand	Tx_length	# of Exons	Annotation	Conserved in Parascaris eliminated genes	Conserved in Toxocara eliminated genes	male mitotic region	spermatogenesis	post-meiotic region	seminal vesicle	spermatids	female mitotic region	female early pachytene	female late pachytene	female diplotene	oocyte	zygote1	zygote2	zygote3	zygote4	24h	46h	64h	96h	5d	7d	L1	L2	carcass	muscle	intestine
AgB01	13282849	13285753	AgB01_g829_t06	+	724	3	hypothetical protein	PgE358_g001_t01		24	10.8	2.8	0.2	3	45.2	52.7	45.8	10.2	18.4	86.5	83.2	58	82.8	54.4	43.9	20.5	2.2	0.2	0.8	0.8	0	2.1	1.1	0
AgB01	13298173	13299642	AgB01_g830_t01	-	309	2	hypothetical protein			36.9	5.6	9.5	15.9	10.3	30.7	34.3	30.9	6.1	14.3	52.6	80.3	95.3	66.7	84.5	111.8	119.9	112.5	59.4	27.4	14.3	11.2	22.9	8.6	4.9
AgB01	13301817	13311423	AgB01_g831_t04	-	738	5	hypothetical protein	PgB03_g172_t06,PgE083_g002_t03	MSTRG.13371.1	15.2	38.9	4.2	0.2	0.4	0	0	0	0	0	0.4	0.1	0.1	0.3	0.5	0.5	0	0.1	0	0	0	0	0.1	0	0
AgB01	13313984	13328344	AgB01_g832_t01	-	1838	12	ubiquitin carboxyl-terminal hydrolase 7	PgE053_g002_t04,PgB22_g042_t04	MSTRG.20929.1,MSTRG.21577.15	28.8	14.1	3.7	0.1	3.4	32.9	38.5	38.8	11.4	29.1	182.6	199.7	285.8	217.4	83.5	86	30.4	3.3	1	1.7	1.9	0.9	4	1.3	0
AgB01	13330099	13338065	AgB01_g833_t04	+	1181	7	hypothetical protein	PgE053_g001_t02	MSTRG.10841.1	97.7	10.2	2.3	0.5	32.3	116.2	102.5	98.1	18.8	11.5	12.9	15.9	11.2	13.6	45.4	64.1	41.1	6.4	1.4	1.1	1.6	0	4.5	3.9	0.1
AgB01	13339399	13362208	AgB01_g834_t04	+	4004	14	Solute carrier family 2, facilitated glucose transporter member 5	PgE004_g001_t02,PgB45_g001_t01,PgE073_g001_t02	MSTRG.23266.3,MSTRG.23266.3,MSTRG.16871.4,MSTRG.21333.2,MSTRG.21333.2,MSTRG.21333.2	11.5	21	2.4	0.1	0.2	0	0	0	0	0	0.6	0.8	0.9	1.5	5.5	4.1	3.7	0.1	0	0	0	0	0.1	0	0
AgB01	13339412	13361435	AgB01_g835_t01	-	22024	1	Solute carrier family 2, facilitated glucose transporter member 5			4.4	6.2	0.6	0	0.1	0	0	0	0	0	0.3	0.5	0.6	0.7	2.7	2.5	1.7	0.1	0	0	0	0	0	0	0
AgB01	13362306	13369051	AgB01_g836_t01	-	5718	3	hypothetical protein			6	8.7	0.7	0	0.2	0	0	0	0	0	0.2	0.1	0	0.1	0.3	0.2	0.1	0	0	0	0	0	0	0	0
AgB02	4852474	4868662	AgB02_g278_t01	-	2311	11	ubiquitin carboxyl-terminal hydrolase 7	PgE053_g002_t04,PgB22_g042_t04	MSTRG.20929.1,MSTRG.21577.15	5.6	0.7	0.4	0	2.2	15.8	11	10.4	7.6	14.5	94.9	102.7	106.1	80.1	42.5	48.2	35.1	3.7	1.3	1.4	1.4	0	3.1	1.1	0.1
AgB02	4872672	4877392	AgB02_g279_t03	+	2307	4	Small ubiquitin-related modifier			6.6	0.4	0	0	2.2	6.5	3.6	3.6	1.4	5.9	40.9	28.6	18.9	36.5	46.1	43	21.3	14.9	3.4	1.5	2.1	1.5	2.9	1.2	0.2
AgB02	4865604	4866124	AgB02_g280_t01	.	521	1	hypothetical protein			0.4	0	0	0	0.8	0.8	0.2	0	0	0.1	0.2	0	0.6	0.3	1.2	0.8	0.4	0.6	0	0	0.2	0	0	0	0
AgB02	4867217	4867572	AgB02_g281_t01	.	356	1	hypothetical protein			0	0	0	0	0	0.3	0	0.2	0	0	0.1	0	0	0.4	0.7	0.3	0.6	0.2	0.1	0.3	0	0	0	0	0
AgB02	4877624	4878428	AgB02_g282_t01	.	805	1	hypothetical protein			0.8	0	0	0	0	0.9	0.2	0.7	0	0	0.1	0.8	0.5	0.3	0.4	0.7	0.9	0.1	0	0	0	0	0	0	0
AgB02	4878579	4879209	AgB02_g283_t01	.	631	1	hypothetical protein			2.8	0	0	0	0.5	0.5	0.1	0.3	0	0	0.1	0.7	0.1	0.4	0.5	0.3	0.5	0.1	0	0	0	0	0	0	0
AgB02	4896650	4901515	AgB02_g284_t01	-	711	5	hypothetical protein	PgB32_g011_t03	MSTRG.22955.3,MSTRG.21056.1,MSTRG.22956.1	27.8	106.1	18.4	0.8	4	0	0.1	0	0.5	0	0	0.1	0	0.3	0.1	0.2	0.1	0.1	0.1	0	0.1	0	0.2	0	0.1
AgB02	4903207	4921642	AgB02_g285_t01	-	17853	3	eukaryotic translation initiation factor 3 subunit b	PgB32_g009_t05		11.4	8.3	1	0	0.2	1.9	3.3	3	2.2	6.3	54	40.2	28.6	30.6	11.8	8.1	3.3	0.2	0	0.1	0.1	0	0.7	0.2	0
AgB02	4905016	4926669	AgB02_g286_t03	+	6521	15	Eukaryotic translation initiation factor 3 subunit B	PgB32_g009_t05		20.3	17.4	1.9	0.1	0.8	4.1	7.1	6.5	4.1	7	61.7	39.9	20.5	33	16.6	14.7	5.4	0.7	0.1	0.2	0.4	0	1.5	0.4	0
AgB02	8062186	8078849	AgB02_g471_t05	+	3209	18	Methylmalonyl-CoA mutase	PgE073_g002_t03,PgE575_g002_t02	MSTRG.21740.5,MSTRG.21740.5,MSTRG.22387.5	150.1	281.4	56.8	1	10.9	17.3	12.9	11.8	3.2	4.7	27.3	27.7	25.7	33.7	49.9	72.6	39.3	5.8	1.1	1.2	1.6	0	2.2	0.4	0.2
AgB02	8083068	8089112	AgB02_g472_t03	+	4872	3	Solute carrier family 2, partial	PgB45_g001_t01	MSTRG.16871.4	27.3	78	9.9	0.4	2.5	6.5	5.4	5.4	2.4	1.8	13.2	10.4	9	11.4	10.4	13.7	7	2.2	0.4	0.4	0.6	0	0.9	0.2	0.1
AgB02	8084986	8094341	AgB02_g473_t01	-	2100	10	Solute carrier family 2	PgB45_g001_t01,PgE073_g001_t02,PgE004_g001_t02	MSTRG.16871.4,MSTRG.23266.3,MSTRG.21333.2,MSTRG.21333.2,MSTRG.21333.2	112.5	448.3	61.9	1.9	12.5	29.6	23	23.7	5.6	8.5	52.6	81.7	134.7	63.6	56.1	71.6	56	8.3	1.8	1.3	1.5	0.8	3.6	0.6	0.3
AgB02	8116895	8117361	AgB02_g474_t01	.	467	1	hypothetical protein			3.6	1.5	0.2	0	0.5	2.1	0.6	0.7	0	0.1	0.5	0.2	0.1	1.1	6.6	4.2	0.9	0.9	0.5	1	1.6	3.7	0.1	0	0
AgB02	8121690	8131282	AgB02_g475_t06	-	3363	6	glutamyl-trna amidotransferase subunit b			12	11.2	2.1	0.2	1.5	19.6	11.7	11.3	2	0.3	0.8	0.9	1.1	1.8	5.4	8	7.1	2.3	0.5	0.5	0.8	0	0.1	0.1	0
AgB02	8132306	8134195	AgB02_g476_t03	-	436	3	tRNA-dihydrouridine synthase 2-like protein			73.9	19.3	7.4	2.5	18.4	116.4	103.4	100.3	26.3	1.5	3.4	9	12.5	23	81	104.1	103.8	36.3	15.3	12.5	15.9	7.9	3	2.6	1.3
AgB02	8136276	8144085	AgB02_g477_t03	+	5293	4	glutamyl-trna amidotransferase subunit b			5.2	6.7	1	0	0.5	5.7	3.3	3.4	0.6	0.1	0.6	0.7	1.6	0.7	4.1	4.9	4.7	1.2	0.3	0.4	0.5	0	0.1	0	0
AgB02	8172273	8183585	AgB02_g478_t03	-	221	2	Phosphatidylserine synthase 1			8.9	3.1	0.1	0.1	2.7	5.5	2.6	5.3	3	5.6	11.8	19.4	6.7	27.3	60.6	59	27.7	3.9	1.5	0.3	1.2	0	0.6	0.5	0
AgB02	8202036	8202743	AgB02_g479_t01	+	301	2	hypothetical protein			1.6	1.5	0.9	0.3	0.8	39.2	14.9	18.2	4	2.4	2.7	4.2	4.6	11.2	4.9	2.7	1.6	1.5	2.1	15.1	12.3	0	16.1	3.7	21.3
AgB02	8203073	8211129	AgB02_g480_t01	+	989	3	hypothetical protein			0.9	1.1	0.3	0.1	0.9	12.6	5.7	5.1	4.4	4.3	10.6	7.6	5.6	11.4	4.8	3.4	0.8	2.4	2.5	20.6	26.9	8.7	17	7.2	24.8
AgB02	8229750	8239774	AgB02_g481_t04	+	1174	9	DEP domain-containing protein 1A			8.7	1	1.5	0.7	3.2	41.2	23.3	22.6	2.3	0.7	3.5	9.9	19.9	21.2	29.6	30.2	75.6	29.3	16.3	13.2	9.3	0	0.9	0.3	0.1
AgB02	8243496	8259679	AgB02_g482_t03	-	3559	15	DEP domain-containing protein 1A			18	2.1	2.7	1.3	3.5	26.7	14.1	14.4	2	1.4	4.6	8.5	16	16.1	26.2	30.4	54.1	31	23	20.4	10.6	1.5	0.9	0.4	0.2
AgB02	8285179	8287317	AgB02_g483_t03	+	2139	1	ubiquitin carboxyl-terminal hydrolase 7			0.3	0	0	0	0	0.5	0.4	0.3	0.3	1.3	11.6	6.3	3.5	4.7	5.8	6.4	1.7	1	0.2	0.2	0.2	0	0.6	0.2	0
AgB02	8289565	8290481	AgB02_g484_t01	+	339	2	Ras-related protein Ral-a			0.1	0	0.2	0	0	0.1	0	0.1	0	0.4	0	0.8	0.3	0	0.4	0.5	0	0.3	0.5	0.8	0.9	0	1.3	0.1	0.4
AgB02	8292196	8294312	AgB02_g485_t01	-	231	2	hypothetical protein			0	0	0	0	0	0	0	0	0	0.2	0.2	0	0.5	0	0	0.2	0.9	0	0.4	0.2	0	0	0	0	0
AgB02	8296197	8304167	AgB02_g486_t01	+	2785	12	kinesin-2	PgE213_g002_t01	MSTRG.10388.3,MSTRG.10388.3,MSTRG.22001.5,MSTRG.22001.5,MSTRG.24233.9,MSTRG.24233.9	6.3	0.6	3	0.5	1.1	87.4	205.1	214.9	42.8	37.9	24.4	20.9	22.1	31.2	11	8	2.6	0.4	0.7	0.4	0.4	0.6	3.1	1.1	0
AgB03	18275	27313	AgB03_g001_t02	+	4215	8	hypothetical protein	PgE037_g002_t01,PgE018_g001_t01	MSTRG.10836.1	11.1	20.5	7.2	0.1	1.8	8.4	5.5	6.6	2.8	3.6	10.5	9.8	9.7	10.1	6.7	6.3	2.7	0.7	0.1	0.2	0.3	0.4	1	0.4	0.1
AgB03	26858	60432	AgB03_g002_t07	-	2769	18	Condensin complex subunit 3	PgE037_g001_t04	MSTRG.20490.2	19.4	5.9	1.2	0.2	3.4	64.2	29.2	35.2	7.9	7.1	16.7	29.6	23.2	39.8	22.1	18.4	9.6	1.9	0.6	0.6	0.5	0	1	0.4	0
AgB03	65411	68027	AgB03_g003_t01	+	449	3	hypothetical protein			0.2	0.2	3.1	35.6	26.5	1.5	1.7	1.9	0.7	0.5	0	0	0	0	0.1	0.2	0	0.3	0.5	0.2	4	3.9	3.6	0.4	3.2
AgB03	70138	73231	AgB03_g004_t02	-	1669	3	arylacetamide deacetylase			5.9	1	0.1	0	0.7	12.7	11.1	9.1	2.2	3.2	10.3	9	7.8	11.8	8.3	2.5	2.5	0.1	0	0.1	0.1	0	0.2	0.2	0
AgB03	81112	81368	AgB03_g005_t01	.	257	1	Uncharacterized protein U88			0	0	0	0	0.1	0	0	0	0	0	0	0	0	0	0	0	0	0	0.2	0.1	0	0	0	0	0
AgB03	84951	89008	AgB03_g006_t01	+	3030	2	Arylacetamide deacetylase-like protein	PgE037_g003_t01		11.3	2.9	1.2	0.5	1.2	118.2	132.5	127.4	33	35.8	239.2	137.2	108.1	139.2	65	46.7	10.9	1.1	0.6	0.6	0.7	0	8.8	2.8	0
AgB03	95298	153623	AgB03_g007_t04	+	12951	39	DNA-directed RNA polymerase II subunit RPB1	PgE049_g001_t01	MSTRG.20180.1	67	61	5.9	0.2	13.8	6.2	5.9	6	0.7	2.3	14.1	22.5	74.3	16.8	12.7	11.9	11.2	0.2	0.1	0.1	0.1	0	0.4	0.1	0
AgB03	152660	158854	AgB03_g008_t05	-	1210	3	Major sperm protein	PgE120_g002_t03,PgE136_g002_t04	MSTRG.17381.1,MSTRG.21634.2	40.6	46.5	5.7	0.2	5.2	5.8	3	2.4	1.8	1.4	8.1	7.7	13.7	11.6	12.1	11.9	5.1	0.8	0.2	0.1	0.1	0	0.8	0.4	0
AgB03	160713	168862	AgB03_g009_t02	-	2116	4	hypothetical protein	PgE120_g003_t02	MSTRG.20622.8	7.5	7.9	1.6	0	0.2	0.1	0.1	0.1	0.1	0	0.8	0.6	0.1	0.7	3	1.5	0.1	0	0	0	0	0	0.1	0	0
AgB04	7926129	7937000	AgB04_g456_t02	-	8660	3	dna-binding protein hexbp			6	1.4	0.4	0.1	0.5	13.2	24.3	23.4	4	14.4	128.6	177.1	235.7	151.6	206.8	308.5	333.5	23.5	2.2	2.5	2.1	0.2	5.4	0.6	0.3
AgB04	7931801	7932802	AgB04_g457_t01	.	1002	1	dna-binding protein hexbp			2.6	0.3	0.1	0	0.2	7	15.8	13	1.3	5.1	74.9	79.5	57.5	99.5	182.7	191.5	142.3	15.8	2	1	0.8	0	2.1	0.3	0.1
AgB04	7932973	7934060	AgB04_g458_t01	.	1088	1	dna-binding protein hexbp			1.6	0.2	0.1	0.1	0	2.2	5.3	3.9	0.6	5.6	47.4	40	40.6	50.2	84.7	107.3	149.9	8.2	0.6	0.5	0.4	0	2.3	0.3	0
AgB04	7938443	7938793	AgB04_g459_t01	-	351	1	hypothetical protein			0.1	0.1	0.1	0	0	0	0	0	0	0	0	0.1	0	0	0.1	0	0	0	0	0	0	0	0	0	0
AgB04	7938941	7973850	AgB04_g460_t04	+	4985	18	26S proteasome non-ATPase regulatory subunit 12, partial	PgE214_g001_t03,PgB17_g068_t01	MSTRG.17731.33,MSTRG.17731.33,MSTRG.17758.1,MSTRG.17734.1,MSTRG.17734.1	25.2	50.7	9.2	0.2	4	1.3	0.4	0.3	0.2	0.3	1.5	3	2.4	2.3	1.7	1.4	0.6	0	0	0	0.1	0	0.2	0	0.1
AgB04	7971304	7978198	AgB04_g461_t01	-	2965	4	hypothetical protein			4.5	7.2	1.7	0.1	1.1	0.1	0	0	0	0.1	0.7	0.5	0.2	0.5	0.6	0.2	0.1	0	0	0	0	0	0.1	0	0.1
AgB04	8012606	8022601	AgB04_g462_t03	-	1641	5	excitatory amino acid transporter	PgB17_g069_t01,PgE048_g002_t02	MSTRG.17757.1,MSTRG.23780.3,MSTRG.21657.6,MSTRG.19190.1	20.6	62.2	5.9	0.2	2.7	0.2	0	0.1	0.1	0.1	0.7	1.1	1	1	0.8	0.5	0.1	0	0	0	0	0	0.3	0	0
AgB04	8040093	8048659	AgB04_g463_t01	-	2873	6	Alpha-(1,3)-fucosyltransferase C	PgE289_g001_t01		36.7	56.2	5.4	0.2	1	0	0	0	0	0	0	0	0	0.1	0.5	0.3	0	0	0	0	0.1	0	0.1	0	0
AgB04	8053606	8054069	AgB04_g464_t01	.	464	1	hypothetical protein			5	7.2	1.4	0	0.2	0	0	0	0	0	0	0	0	0	0.1	0	0	0	0	0	0	0	0	0	0
AgB05	7797012	7801049	AgB05_g426_t01	+	975	5	traf-interacting protein			4.3	1.4	0.4	0	0.4	1.1	2.4	2.1	1.4	1.5	4.1	3.3	3.1	5.6	6.9	6.6	6.3	5.4	7.8	4.9	2.9	1.8	0.2	0.1	0
AgB05	7806569	7813022	AgB05_g427_t01	+	2514	8	hypothetical protein			28.6	17.6	45.5	34.7	18.8	25.9	15.6	15.5	22.3	10.8	4.2	5.1	4.6	7.2	10.6	9.4	4.7	5.7	5.6	9.3	5.9	13.8	6	5.1	12.3
AgB05	7812071	7814548	AgB05_g428_t01	-	1200	2	hypothetical protein			10.5	3.6	10.4	10.1	3.2	4.8	4.1	3.8	9.5	2.5	1	0.6	0.5	0.9	1.7	1.6	1	2.6	1.9	2.6	1.9	10.1	3.9	3.4	6.8
AgB05	7814943	7816454	AgB05_g429_t01	-	378	2	hypothetical protein			29.4	12.7	50.9	24.2	18.7	15	12.2	13.4	21.3	5.2	1.7	2.9	2.8	2.7	3.2	2.7	4.2	2.8	2.2	4.2	2.9	4.6	4	3	6.6
AgB06	6286	14025	AgB06_g001_t01	+	1184	7	26s proteasome non-atpase regulatory subunit 2	PgE069_g002_t10	MSTRG.23634.1	8.1	87.6	21.1	0.3	1.6	0.1	0	0	0.3	0	0.4	0.7	0.8	0.8	2.7	1.7	0.7	0.1	0	0	0	0	0.2	0	0
AgB06	31339	35908	AgB06_g002_t01	-	732	5	zinc finger protein	PgE212_g002_t02	MSTRG.22507.1,MSTRG.22507.1	5.9	28.7	1.8	0.1	0.7	0	0	0	0	0	0	0.2	0	0.1	0.1	0	0.3	0.2	0	0	0	0	0	0	0
AgB06	37629	40379	AgB06_g003_t03	+	830	3	zinc finger protein			22.4	21.3	2.9	0.2	0.3	0	0	0	0	0	0.1	0.1	0.5	0.1	0.2	0.2	0	0	0	0	0	0	0	0	0
AgB06	50966	60195	AgB06_g004_t01	+	3494	5	LINE-1 reverse transcriptase	PgB03_g168_t03,PgB03_g166_t01,PgB17_g067_t01	MSTRG.20933.2,MSTRG.22171.2,MSTRG.20932.1	9.6	10.9	0.8	0	0.5	0	0	0	0.4	0.3	4.4	5.1	4	4.5	6.5	4.5	1.4	0.2	0	0	0	0	0.2	0	0
AgB06	70993	89439	AgB06_g005_t04	-	3001	13	hypothetical protein		MSTRG.16872.1	36.9	166.2	25	0.4	5.5	0.1	0.1	0	0.3	0.2	0.4	0.7	0.7	0.3	0.6	0.4	0	0	0	0	0	0	0.6	0	0.1
AgB07	37200	46404	AgB07_g004_t04	-	2294	8	rna binding protein		MSTRG.21054.3,MSTRG.21055.1	20.1	3.2	0.8	0.1	5.2	30.7	15.1	14.3	5	10.8	59.9	48.6	37.3	57	46.6	55.6	27.2	11.5	3.7	2.2	2	0	3.3	1	0.1
AgB07	50658	51098	AgB07_g005_t01	+	441	1	rims-binding protein 2	PgE295_g001_t02,PgE059_g002_t01,PgE139_g002_t01,PgE011_g010_t01	MSTRG.21881.2,MSTRG.21881.2,MSTRG.18626.6,MSTRG.18626.6,MSTRG.11664.1,MSTRG.21056.1,MSTRG.21054.3	1.3	1	0.8	0	0	0.7	0.1	0.3	0	0	0	0	0	0	0	0	0	0.1	0.1	0.1	0.5	0	0	0	0
AgB07	52577	53434	AgB07_g006_t01	+	858	1	hypothetical protein		MSTRG.22574.6,MSTRG.18626.6,MSTRG.18626.6,MSTRG.21360.1,MSTRG.24235.1,MSTRG.24236.1,MSTRG.22392.9	1	0.1	0.6	0.2	0	0.9	0.3	0.3	0.5	0.1	0.1	0	0.2	0.1	0.2	0.2	0.6	0.3	0.3	0.5	0.3	0	0.1	0	0.3
AgB07	55087	82816	AgB07_g007_t05	-	4865	26	chitin synthase 8	PgB07_g103_t01,PgE051_g001_t01	MSTRG.23261.1,MSTRG.23081.1	8.1	0.6	2.6	0.7	2.5	270.4	272.7	286.8	42.8	47	185.4	178.4	175.2	149.2	39	27.6	9.3	1.3	0.3	0.7	1	0	7.3	5.3	0
AgB08X	2200	2634	AgB08X_g001_t01	+	435	1	hypothetical protein		MSTRG.23127.1	0.3	0	0.4	0.1	0.5	0.5	0.2	0.4	0	0	0	0	0.1	0.3	0.3	0	0	0.8	0.6	0.7	0.2	0	1	0.4	0
AgB08X	5930	8043	AgB08X_g002_t01	+	405	4	zinc c2h2 type family protein	PgE044_g003_t01,PgB28_g015_t01,PgE157_g001_t01		1	0	0	0	0	1	0	0.4	0	0	0	0	0	0	0.1	0	0	0.1	0	0	0.1	0	0	0	0
AgB08X	8401	12764	AgB08X_g003_t01	-	1256	7	zinc c2h2 type family protein	PgB28_g015_t01,PgE157_g001_t01,PgE044_g003_t01,PgE272_g001_t01		0.8	0	0	0	0.1	2.8	0.5	1	0	0	0	0.3	0	0	0.6	0.2	0.3	0.1	0	0.1	0	0	0	0	0
AgB09X	3179451	3179816	AgB09X_g152_t01	-	366	1	hypothetical protein			0	0	0	0	0	0	0	0	0	0	0	0	0	0	0	0	0	0	0	0	0	0	0	0	0
AgB09X	3181861	3194842	AgB09X_g153_t01	+	2292	14	Zinc finger protein 277		MSTRG.23610.2	24.3	1.7	0.7	0.1	4.6	8.6	6.9	6.5	2.9	1.5	6.2	5	5.5	7.8	9.1	10.5	6.3	1.2	0.4	0.3	0.5	0	0.4	0.3	0
AgB09X	3209790	3211234	AgB09X_g154_t02	-	1240	2	zinc c2h2 type family protein	PgB28_g015_t01,PgE157_g001_t01,PgE044_g003_t01		3.6	3	0.2	0.1	0.3	0.9	0.6	0.2	0	0	0.2	0.4	0.1	0.1	0.3	0.2	0.1	0.1	0.2	0.1	0	0	0	0	0
AgB09X	3242287	3246265	AgB09X_g155_t01	+	1065	4	hypothetical protein			6.4	0.4	1.8	1.6	2.6	47.4	76.3	63.9	9.1	12.9	61.9	67.9	75.5	103.8	57.8	33.4	22.6	28	47.1	56.9	101.4	3.2	29	46.8	4.4
AgB10	39415	57032	AgB10_g001_t03	-	10048	7	hypothetical protein		MSTRG.16484.4	10.5	20.4	2.1	0	0.5	0	0	0	0	0.1	4.8	4.9	3.7	8.3	16.3	14.8	13.9	18.5	6.1	1.3	0.8	0.3	1.1	0.1	0.3
AgB10	43117	57296	AgB10_g002_t10	+	5185	5	hypothetical protein			19.1	34.4	4	0.2	1	0	0.1	0	0	0.1	3.9	7.7	8.8	9.8	4.7	2.1	1.7	0.6	0.2	0.1	0.1	0	0.3	0	0.1
AgB10	65846	78232	AgB10_g003_t01	-	1473	8	hypothetical protein	PgB43_g003_t03		79.8	101.8	17.4	0.7	13.3	12.9	10	9.5	6.3	3.6	22.9	19.6	29.9	28.7	23.6	22	14.4	1.6	0.4	0.3	0.7	1.2	3.6	0.6	0.1
AgB11	4571	8932	AgB11_g001_t02	+	2286	4	Cation transport regulator-like protein 2			2.9	3.6	1.5	2.1	1	1.6	1.5	0.8	0.5	0.6	0.5	0.4	0.2	0.9	1	1.1	1.3	2.7	2.9	1.7	1.4	0.8	1	0.5	0.2
AgB11	12761	13264	AgB11_g002_t01	+	504	1	gag-pol polyprotein	PgE296_g002_t01	MSTRG.24235.1,MSTRG.24236.1,MSTRG.21360.1,MSTRG.18626.6,MSTRG.22574.6	0.5	0.4	0.1	0	0	0.4	0.1	0	0	0	0	0.1	0	0	0	0	0	0	0	0	0	0	0	0	0
AgB11	23848	37992	AgB11_g003_t03	+	14082	2	gag-pol polyprotein	PgE296_g002_t01,PgE078_g003_t01,PgE059_g004_t01	MSTRG.24235.1,MSTRG.24236.1,MSTRG.21360.1,MSTRG.18626.6,MSTRG.22574.6,MSTRG.22574.6,MSTRG.22392.9	2.5	2	0.1	0	0.1	1.6	0.6	0.6	0.1	0.7	3.9	3	1.8	3	4	1.6	0.5	0.1	0	0	0.1	0	0.2	0	0
AgB12	2418	3570	AgB12_g001_t01	.	1153	1	Transposon-derived protein, partial	PgE006_g009_t01		3.7	5.2	0.6	0.2	0.6	0.7	0.2	0.1	0.3	0.2	0.1	0.7	0.4	0.5	0.5	0.5	1.3	1.8	3.3	3.2	2.4	1.5	0.3	0.1	1
AgB12	22196	34720	AgB12_g002_t10	+	2466	6	megakaryocyte-associated tyrosine-protein kinase	PgB18_g049_t02	MSTRG.18387.3	99.4	140.5	14.4	0.8	6.3	4.8	3.7	4.2	1.3	1.1	6.6	6.8	3.4	8.2	6.1	4.1	1.6	0.3	0.1	0.1	0.2	0	0.7	0.2	0.3
AgB13X	2262542	2276173	AgB13X_g103_t08	+	845	6	CCR4-NOT transcription complex subunit 2	PgE475_g001_t01,PgE616_g001_t01,PgE652_g001_t01	MSTRG.20589.2,MSTRG.20589.2	32.8	7	1.7	0	10.6	7.5	2.1	1.9	0.5	0.4	7.6	11.4	16	8.3	28.3	21.2	16.5	4.7	1.3	1	1.1	0	1.2	0.2	0.1
AgB14	3317	28389	AgB14_g001_t01	-	4153	13	Hsp90 co-chaperone cdc37	PgE046_g001_t03	MSTRG.21299.1,MSTRG.21519.4,MSTRG.22792.3	56.8	82.5	9.7	0.7	4.9	8.1	5.8	5.7	1.6	1.3	5.6	7.1	7.8	8	15.2	15.3	10.9	2	0.6	0.6	1	0	0.9	0.2	0.2
AgB14	30088	47072	AgB14_g002_t10	-	2649	16	putative rna-binding protein orb2	PgB41X_g004_t04,PgE203_g001_t02,PgE096_g001_t04	MSTRG.23108.1,MSTRG.23046.2,MSTRG.18758.3,MSTRG.18758.3,MSTRG.23435.4	78.2	75	8.9	0.5	7.1	82	50.1	50.8	4.7	1.8	22	20.3	20.4	38.1	39.2	37.6	20	3.1	0.7	0.7	0.9	0	1.4	1.1	0
AgB14	55673	64189	AgB14_g003_t05	-	1955	7	Serine/threonine-protein kinase	PgB41X_g003_t01,PgB25_g018_t01	MSTRG.21615.1,MSTRG.17769.3,MSTRG.20782.13,MSTRG.22673.1,MSTRG.22167.7	32.4	23	1.7	0.2	2.4	11.1	7.9	8.8	0.9	0.8	5.4	7.7	7.3	6.2	5.5	7.8	7.8	0.6	0.3	0.1	0.1	0	0.3	0.2	0
AgB14	64638	70965	AgB14_g004_t01	-	1745	4	60S ribosomal protein L13			119.7	12.1	2.5	0.4	25.1	90.5	88.9	76.9	12.4	10.7	38.4	40.1	46.5	20.5	20	31	66.7	9.2	2.8	1.6	1.1	0	4	3.1	0.1
AgB14	72060	73557	AgB14_g005_t01	+	632	7	hypothetical protein			0.4	0.3	0.1	0	0.6	0.2	0	0	0	0.3	0.7	1.2	4	1.9	1.1	1.1	0.7	0.4	0.1	0.1	0.1	0	0	0.1	0
AgB14	73931	77887	AgB14_g006_t01	+	922	3	hypothetical protein			2	4.5	0.5	0	0.2	0.3	0	0	0	0	2.1	2.7	3.1	4.5	3.5	1.8	2.7	0.3	0	0	0	0	0.1	0	0
AgB14	76090	90922	AgB14_g007_t02	+	2335	5	hypothetical protein		MSTRG.1698.3,MSTRG.18392.1	8.3	8.7	1.2	0.1	1.8	6.7	6.6	5.8	4.4	7	44.2	30.6	22.4	40.2	35	30.3	12.4	2.6	1	0.8	1	0	2.1	0.6	0.1
AgB15X	208	16417	AgB15X_g001_t02	-	2162	12	Kelch-like protein 10	PgE019_g002_t05,PgE019_g002_t05	MSTRG.10150.8,MSTRG.20493.2,MSTRG.20493.2	16.8	94.6	39.4	0.3	3.1	1.9	0.4	0.6	0.1	0.1	0.7	1.1	0.5	1.1	1	1.4	1.2	0.1	0.1	0	0.1	0.8	0.2	0	0
AgB15X	17416	28681	AgB15X_g002_t03	+	2296	7	Proteasome subunit alpha type-7	PgE019_g003_t01		76.2	24.5	3.2	0.2	9.9	45.3	33.5	30.9	6.5	2	18.2	16.2	12.6	16.1	11.7	18.5	13.3	2.1	0.6	0.4	0.4	0	1.7	1.4	0.1
AgB15X	32818	44380	AgB15X_g003_t01	+	3748	10	Tristetraprolin, partial	PgE019_g004_t01,PgE182_g003_t02,PgE020_g002_t01	MSTRG.23483.1,MSTRG.23371.1,MSTRG.17401.1,MSTRG.17223.2,MSTRG.17223.2,MSTRG.21582.1,MSTRG.17399.1	37.6	9.5	2.8	0.4	4.4	106.8	111.6	103.7	14.7	13.1	84.5	71.1	63.5	72.9	56.8	51.5	26.1	4.3	1.5	1.8	1.7	0	2.9	1.2	0
AgB16X	1191	17775	AgB16X_g001_t03	-	1856	12	Ubiquitin carboxyl-terminal hydrolase 7	PgB22_g042_t04	MSTRG.21577.15,MSTRG.20880.1,MSTRG.20522.1	3.8	0.5	0.5	0	1.8	6.3	5.4	4.7	3.7	2.2	8.1	10.8	15.1	17.2	9.8	16.1	8.5	1.4	0.7	0.7	0.4	0	0.2	0.1	0
AgB16X	21245	21583	AgB16X_g002_t01	.	339	1	Transposon-derived protein, partial			0.5	1.6	0.3	0.4	0.5	0.3	0.2	0	0	0.1	0.1	0.6	1.2	0.6	0	0.3	1.1	1.2	0.8	1	2.4	0	0	0	0.1
AgB16X	28441	36294	AgB16X_g003_t01	+	840	8	zinc c2h2 type family protein	PgB28_g015_t01,PgE157_g001_t01		1.5	1.2	26.7	2.9	10.3	1.8	1	1.3	4.7	4.2	0.1	0.3	0.3	0.1	0.5	0.5	1.1	0.1	0.1	2.5	7.9	24.7	3.6	17.2	0
AgB16X	55522	61158	AgB16X_g004_t01	+	828	7	zinc c2h2 type family protein	PgB28_g015_t01,PgE044_g003_t01,PgE157_g001_t01,PgE272_g001_t01		1.2	0.1	0.1	0	0.1	1	0.1	0.2	0	0	0.1	0.1	0	0.1	0.4	0.2	0.3	0	0	0	0	0	0	0	0
AgB17	1474618	1479259	AgB17_g092_t02	-	972	5	Major sperm protein	PgE136_g002_t04,PgE120_g002_t03	MSTRG.21634.2,MSTRG.21634.2,MSTRG.17381.1	20.6	57.9	9.3	0.1	3.5	0.1	0.1	0	0.1	0	0.3	1.1	0.3	0.9	1.1	1	0.7	0.1	0	0	0	0	0.3	0	0.2
AgB17	1482574	1486707	AgB17_g093_t02	-	1131	2	hypothetical protein			15.1	108.6	16.7	0.5	7.8	0.1	0	0.1	0.2	0.2	0.1	0.4	0.2	0.3	0.4	0	0.2	0	0.1	0.1	0.3	0	0.8	0	0.7
AgB17	1482574	1483222	AgB17_g094_t01	.	649	1	hypothetical protein			4.5	19.2	2.6	0.1	1.7	0.1	0.1	0	0	0.1	0.1	0.1	0	0.5	0.5	0.1	0.3	0	0	0	0	0	0.1	0	0.1
AgB17	1488609	1490077	AgB17_g095_t01	.	1469	1	hypothetical protein			0.3	0.3	0	0	0.1	0.2	0.1	0	0.1	0	0.3	0.3	0.1	0.3	0.4	0.3	0.1	0.1	0	0	0	0	0	0	0
AgB17	1497714	1509022	AgB17_g096_t01	+	2240	14	Cubilin, partial			0.3	0.5	0.5	0.1	0.1	1.2	0.7	1.1	7.7	3.1	1.8	1.1	0.8	4.2	1.6	1.3	0.3	1.1	1.7	0.8	4.9	3.9	3.4	0.1	0.2
AgB17	1518556	1532692	AgB17_g097_t01	-	942	9	Warthog protein 4, partial			0.2	0.1	0	0	0	0	0	0	0	0.2	0	0	0.2	0	0.2	0.1	0.1	0.3	0.2	0.1	0	0	0.4	0.5	0
AgB17	1539826	1543816	AgB17_g098_t02	-	686	3	hypothetical protein			3.1	1.4	0.6	1.6	0.7	4.6	4.1	6.1	2.3	3.8	4.9	1.9	1.2	7.5	4.5	4.1	1.4	4.4	4.7	3.5	3.2	2.5	3.1	0.8	0.8
AgB17	1547438	1554311	AgB17_g099_t02	-	2341	3	Long-chain-fatty-acid--CoA ligase 5			14.7	6.5	0.7	0.2	0.9	22.1	20.8	19.7	2.9	4.8	5	5.2	5.1	4.3	9.3	9.9	8.9	1.6	0.6	0.5	0.8	0	1.2	1.4	0
AgB17	1558133	1577390	AgB17_g100_t06	-	1427	9	Long-chain-fatty-acid--CoA ligase 5			16.3	5.6	1.3	0.1	1.6	67.9	41.8	42.9	4.7	3.7	4.8	5.9	5.1	8.5	7.1	8.3	5.1	1.4	0.5	0.2	0.5	0	0.7	0.8	0
AgB17	1566002	1569111	AgB17_g101_t02	+	1036	2	long-chain-fatty-acid-- ligase 5			5.3	3.3	0.6	0.1	0.6	20.7	12.6	12.5	1.3	3.7	2.9	5.1	4.4	2.9	3.4	2.9	1.3	0.6	0.2	0.2	0.1	0	0.2	0.2	0
AgB17	1573431	1576492	AgB17_g102_t01	-	1686	2	ubiquitin-conjugating enzyme e2 2	PgE109_g003_t01,PgE109_g002_t01,PgE111_g001_t01,PgE030_g001_t02	MSTRG.8297.2,MSTRG.17394.1,MSTRG.22259.5,MSTRG.13376.1,MSTRG.16583.3,MSTRG.16583.3,MSTRG.18545.1,MSTRG.18751.1,MSTRG.1696.1,MSTRG.21511.1,MSTRG.7436.1,MSTRG.21512.1,MSTRG.21589.1,MSTRG.22898.1	199.1	282.1	41.1	2	19	98.8	111.5	96.9	8.5	4.8	10.1	10.5	15.3	12.4	30.9	32.1	41.3	4.3	1.4	1.5	2.1	0	1.6	0.4	0.2
AgB17	1606203	1612680	AgB17_g103_t01	.	6478	1	Heterogeneous nuclear ribonucleoprotein L			10.3	3.9	0.7	0	2.3	6.2	4.2	3.9	0.9	0.4	3	3	2.8	4.9	6.7	7.6	3.7	0.6	0.2	0.1	0.2	0	0.2	0.1	0
AgB17	1657793	1659245	AgB17_g104_t01	.	1453	1	hypothetical protein			6.1	7.7	0.8	0	0.3	6.7	4.7	4.7	0.4	0	0.5	0.6	0	0.4	4.6	2.6	2.6	0.4	0.2	0.1	0.1	0	0	0	0
AgB17	1665430	1668833	AgB17_g105_t12	-	2140	6	baculoviral iap repeat-containing protein 6			16.1	13.9	5.3	1.2	4.3	30.4	15.7	18.4	4.5	2.2	3.4	3.5	4.6	5.8	20.5	23.1	19.7	7.9	6.4	5.7	4.7	2.4	0.8	0.8	1.6
AgB17	1744849	1760150	AgB17_g106_t28	-	2525	10	Titin			56.3	9.4	3.1	0.2	9.2	26	10.3	11.3	6.6	1.7	4.7	12.4	26.9	14.6	45	53.3	102.9	16.8	5.6	4.8	5.6	0.7	0.3	0.1	0.2
AgB17	1717029	1719806	AgB17_g107_t06	.	2778	1	hypothetical protein			1	3.1	0.7	0	0	3.6	2.3	2.2	0.3	0.1	0.1	0.1	0.1	0.1	0.4	0.5	1.3	0.4	0.2	0.1	0.1	0	0.1	0	0.1
AgB17	1720716	1726888	AgB17_g108_t01	.	6173	1	spindle- and centromere-associated protein			0.5	2	0.1	0	0	2.4	2.4	2.5	0.2	0	0.3	0.1	0.1	0.1	0.2	0.2	0.9	0.1	0	0	0	0	0	0.2	0
AgB17	1732594	1737176	AgB17_g109_t02	-	590	4	spindle- and centromere-associated protein			11	100.1	7.7	0.1	2.4	33.2	25.9	26.6	9	3.4	1.1	2.3	3.6	3.3	38.3	58.2	84.9	14.6	2.8	3.4	5	2.9	0.4	1.8	0
AgB17	1744252	1776613	AgB17_g110_t01	+	2858	9	Titin			49.2	9.1	2.1	0.1	7.3	17.6	6.5	7	2.4	0.9	3.8	8.2	17.2	8.7	30.9	32.5	59.5	13.6	3.8	3.4	4.7	0.6	0.3	0.1	0.1
AgB17	1754280	1767768	AgB17_g111_t01	+	330	3	hypothetical protein			46.3	3.3	1.2	0	10	16.6	5.4	6.3	5.7	0.9	3.3	7.6	10.3	11.2	45.3	52.7	81.5	13.2	5.7	2.4	3.2	0	0.2	0	0
AgB17	1757702	1759553	AgB17_g112_t01	.	1852	1	hypothetical protein			22.1	1.5	0.6	0	1.6	11.6	2.8	3.3	0.8	1.2	5.6	7.3	8.4	4.4	14.3	12.2	17.5	15.8	3.8	4.9	6.5	0.9	0.2	0.1	0.2
AgB17	1770105	1780986	AgB17_g113_t05	+	972	3	hypothetical protein			39.6	4.4	2.3	0.1	6.8	20.2	5.2	5.9	2.5	0.4	3.6	6.8	12.5	8.2	31.4	32.2	55.5	10.9	3.1	2.6	3.2	0	0.3	0.1	0.1
AgB18	23708	26623	AgB18_g001_t05	+	2041	3	zinc c2h2 type family protein			3.9	1.9	0.2	0	0.2	1.2	0.3	0.3	0	0	0.1	0.1	0	0	0.4	0.2	0.1	0.1	0	0.2	0	0	0	0	0
AgB18	49311	52357	AgB18_g002_t01	+	1535	5	zinc c2h2 type family protein			0.6	0.1	0	0	0	0.9	0.3	0.4	0.2	0	0.2	0.1	0.4	0.1	1.2	0.2	0.4	0	0.1	0	0.1	0	0	0	0
AgB18	52430	59390	AgB18_g003_t01	+	5380	2	hypothetical protein			0.8	0.1	0	0	0	0.5	0.2	0.1	0	0.5	1.1	3.1	15.7	1.5	7.8	3.6	9.8	0.6	0.5	0.3	0.3	0	0	0	0
AgB18	69120	69666	AgB18_g004_t01	.	547	1	hypothetical protein			2.5	1.3	0	0	0	0	0	0.1	0	0	0.2	0.2	0	0.1	0.4	0	0.2	0	0	0	0	0	0	0	0
AgB19	1123	11318	AgB19_g001_t04	-	1620	8	MOG interacting and ectopic P-granules protein 1		MSTRG.18836.1	27.3	2.8	0.3	0.2	9.1	12.8	23	23.9	8.4	11.7	57.2	85.6	82.2	66.5	28.6	23.9	14.8	0.8	0.2	0.5	0.6	0	1.6	0.6	0
AgB20	831	27548	AgB20_g001_t01	-	3231	34	Hemicentin-1, partial			3.3	0.5	3.3	1	1.1	3	2.9	2.6	1	1	2.2	2.3	3.1	3.4	3.6	4.1	3.1	1.6	1	1.3	4.8	1.1	0.7	0.8	2.1
AgB20	31203	32259	AgB20_g002_t01	.	1057	1	hypothetical protein	PgE443_g001_t01,PgE273_g001_t01,PgE006_g002_t01,PgE059_g001_t01	MSTRG.16716.1	0.4	0.6	0.5	0.7	0.5	0.5	0.1	0.1	0.3	0.5	12.5	28.2	45.3	62.1	41.9	20	122.6	50.5	5.8	5.4	2.8	4.9	2.3	0.4	1
AgB20	52036	57150	AgB20_g003_t01	.	5115	1	hypothetical protein	PgE363_g002_t01,PgE363_g002_t01,PgE660_g001_t01	MSTRG.16484.4,MSTRG.16484.4,MSTRG.22983.6,MSTRG.21902.2,MSTRG.23247.4	3	3.1	1.4	0.2	0.2	1.8	1.7	1.4	0.4	0.4	0.2	0.2	0.3	0.2	0.8	0.5	1.1	1.1	0.6	0.6	0.9	1.7	0	0.3	0.5
AgB20	64535	65391	AgB20_g004_t01	.	857	1	hypothetical protein			0.8	0.3	0	0	0	0.4	0	0.3	0	0.1	0.1	0	0.1	1.1	0.4	0.8	1.5	1.1	0.1	0	0.1	0	0	0	0.1
AgB20	66736	68043	AgB20_g005_t01	-	272	2	hypothetical protein			8.2	8.8	4.3	7.5	3.7	8.7	7.5	6.9	4.5	8.2	13	11.2	8.2	16.1	34	43.8	23.5	13.5	3.1	1.4	1.8	12.7	19	19.2	54.7
AgB20	74131	77477	AgB20_g006_t01	+	3347	1	hypothetical protein		MSTRG.17936.1,MSTRG.17937.1,MSTRG.17764.1	1.3	1.5	0.6	0.1	0.2	0.2	0.1	0.1	0.8	1.4	0.7	1.1	1.1	1.5	2	1.2	2.6	6.9	4	1.9	2.1	48	5	2.4	2.2
AgB20	80077	80376	AgB20_g007_t01	-	300	1	hypothetical protein			2.1	3.1	0.4	0.1	0	0.2	0.9	0.5	0	0	0.4	0.2	0	0	3.2	2.2	0.7	0.1	0	0.2	0.4	0	0	0	0
AgB20	90405	113957	AgB20_g008_t07	+	4071	9	baculoviral iap repeat-containing protein 6	PgE019_g001_t09	MSTRG.24063.1,MSTRG.23519.4,MSTRG.23867.1	2.9	25.3	2.1	0	0.6	0.3	0.3	0.4	0	0.1	0.4	0.3	0.3	0.3	0.4	0.2	0.2	0	0	0	0	0	0.1	0	0
AgB20	113267	120284	AgB20_g009_t01	-	731	5	baculoviral iap repeat-containing protein 6	PgE019_g001_t09	MSTRG.23867.1,MSTRG.22482.2,MSTRG.22482.2,MSTRG.24063.1	12	88.3	5.9	0.1	2.3	0.5	0.1	0.3	0	0	0.2	0.1	1.3	0.7	2	1.4	0.9	0.2	0	0	0	0	0.3	0	0.1
AgB20	124837	141381	AgB20_g010_t01	+	1700	10	hypothetical protein	PgE061_g001_t06	MSTRG.17403.3,MSTRG.20439.1,MSTRG.10846.1	66.8	160	18.1	0.9	6.3	0.5	0.9	0.4	0	0.3	1.2	1.7	1.3	1.5	2.2	1.6	1.6	0.1	0	0	0.1	0	0.5	0	0.1
AgB20	128954	131929	AgB20_g011_t01	-	618	2	hypothetical protein		MSTRG.17403.3	29.7	80.5	9.7	0.3	2.7	0.3	0.3	0.2	0.2	0	0	0	0.3	0.1	0.1	0.2	0.1	0.1	0	0	0	0	0.1	0	0
AgB20	146458	154788	AgB20_g012_t05	+	2989	9	Tristetraprolin	PgE020_g002_t01,PgE019_g004_t01,PgE182_g003_t02,PgB20_g058_t01	MSTRG.23483.1,MSTRG.23371.1,MSTRG.17401.1,MSTRG.17223.2,MSTRG.17223.2,MSTRG.21582.1,MSTRG.17399.1	0.8	0.4	0.3	0.2	0.4	46.7	62.8	66.4	24.5	25.3	351.4	241.8	134.2	218.1	276.1	178.3	59.2	7.1	1.4	2.1	2.2	0	3.9	0.6	0
AgB20	157044	165517	AgB20_g013_t01	+	1088	6	Tyrosine-protein phosphatase Lar-like protein	PgE020_g001_t04,PgE020_g001_t04,PgE293_g001_t01,PgE229_g002_t04,PgE029_g001_t02	MSTRG.22327.1,MSTRG.23873.1,MSTRG.21920.4,MSTRG.23872.1,MSTRG.20793.1,MSTRG.21654.2,MSTRG.20010.1,MSTRG.18835.3,MSTRG.23026.4,MSTRG.1831.1,MSTRG.22716.2,MSTRG.22740.5,MSTRG.21864.2,MSTRG.23028.1,MSTRG.23028.1,MSTRG.22741.1	4.3	70.7	21.8	0.1	0.7	0.8	0.2	0.5	0	0.5	1.5	1	2.4	0.9	1.1	0.2	0.3	0.1	0	0	0	0	0.2	0	0.1
AgB21	2717	26878	AgB21_g001_t02	-	1876	15	kelch-like protein 10	PgE019_g002_t05,PgE144_g001_t01	MSTRG.10150.8,MSTRG.20493.2,MSTRG.20493.2	27.3	35.6	11.2	0.1	6.4	29.9	7.9	7.8	1	2.7	17	19.9	19.2	18.9	23.3	18	17	2.4	0.4	0.7	0.9	0	0.5	0.2	0
AgB21	38310	45228	AgB21_g002_t01	-	3514	9	zinc c2h2 type family protein	PgB28_g015_t01,PgE157_g001_t01,PgE044_g003_t01,PgE272_g001_t01		4.5	0.5	0.2	0	0.3	3.9	1	1.2	0.1	0	0.1	0.2	0.1	0.2	1.2	0.6	0.8	0.1	0.1	0	0.1	0.5	0	0	0
AgB21	49566	56086	AgB21_g003_t02	-	1726	10	Tau-tubulin kinase 1	PgB10_g103_t01,PgE078_g001_t01,PgB22_g041_t04,PgB25_g018_t01,PgE232_g001_t04,PgE021_g005_t04,PgE149_g003_t02,PgE156_g001_t11,PgE397_g001_t01,PgE034_g004_t01,PgE111_g002_t03,PgE498_g001_t01,PgE039_g003_t02	MSTRG.21667.1,MSTRG.22718.1,MSTRG.23846.1,MSTRG.20782.13,MSTRG.20782.13,MSTRG.20353.1,MSTRG.13368.2,MSTRG.23052.1,MSTRG.13365.1,MSTRG.22673.1,MSTRG.18753.1,MSTRG.22167.7,MSTRG.17769.3,MSTRG.18388.5,MSTRG.16874.1,MSTRG.21745.1,MSTRG.22376.1,MSTRG.22376.1,MSTRG.19589.1,MSTRG.21747.2,MSTRG.20059.1,MSTRG.23426.4,MSTRG.22403.2,MSTRG.21655.5,MSTRG.21655.5,MSTRG.21615.1,MSTRG.13370.1,MSTRG.16581.1,MSTRG…	103.6	243.5	22.3	0.5	8.8	5.5	7.3	7.5	2.7	1.7	6.6	6.3	5.8	8.3	13.6	18.9	10.2	1.7	0.2	0.4	0.6	0	1	0.2	0.2
AgB21	57048	57959	AgB21_g004_t01	.	912	1	hypothetical protein		MSTRG.24236.1,MSTRG.24236.1	1.6	0.5	0.4	0	0.4	0.3	0.1	0.1	0	0.1	0.2	0.1	0.6	0.8	0.5	0.2	0.2	0.2	0	0	0	0	0	0	0
AgB21	58128	58361	AgB21_g005_t01	+	234	1	hypothetical protein	PgE078_g002_t01		1.4	0.1	0	0	0	0.7	0	0	0	0.2	0.2	0.7	0	0.5	0.2	0	0.7	0	0	0	0	0	0	0	0
AgB21	62162	67695	AgB21_g006_t03	-	2608	5	hypothetical protein			11.5	1.6	0.2	0	1.1	3.4	1.3	1.7	0.4	0.3	1.4	2.1	1.6	2.4	9.2	11.1	6.8	1.3	0.5	0.3	0.3	0	0.2	0	0
AgB22X	7728	9344	AgB22X_g001_t01	+	521	3	E3 ubiquitin-protein ligase RNF115			1.1	0.1	0	0	0.5	5.1	1.7	1	0.4	0.1	1.5	2.1	3.4	3	2	3.4	1.6	0.1	0	0	0	0	0.1	0	0
AgB22X	9399	15657	AgB22X_g002_t01	+	4997	3	e3 ubiquitin-protein ligase			0.8	0.1	0	0	0.1	0.8	0.4	0.4	0	0.1	1.6	0.9	0.6	1.4	2.1	2	0.9	0.2	0.1	0.1	0.1	0	0.2	0.1	0
AgB22X	10936	33918	AgB22X_g003_t04	-	7085	17	tudor domain containing protein	PgE002_g001_t01,PgE001_g007_t01,PgE001_g007_t01,PgE641_g001_t01,PgE384_g001_t01,PgE006_g006_t06	MSTRG.19347.2,MSTRG.7997.22,MSTRG.21687.6,MSTRG.7998.1	11.2	0.6	0.3	0	3.2	17.2	9.9	9.9	1.2	1.2	6.9	8.1	9.9	12.5	16.1	19.4	14	1.9	0.4	0.4	0.5	0	0.4	0.2	0
AgB23	1079039	1133983	AgB23_g072_t01	+	7063	40	Proteasome activator complex subunit 4	PgE031_g002_t06,PgE003_g001_t05,PgE152_g001_t05	MSTRG.21621.1,MSTRG.21057.1,MSTRG.524.3,MSTRG.524.3,MSTRG.23353.5,MSTRG.21623.1,MSTRG.21623.1	31.2	221.1	21.2	0.5	4.5	3	4.2	3.9	1.2	0.6	2.7	3.3	3	4	3.9	4.1	3.1	0.5	0.3	0.2	0.5	0.5	0.5	0.1	0
AgB23	1134539	1135007	AgB23_g073_t01	.	469	1	hypothetical protein			0.2	0.1	0.6	0.4	3.4	1	0.2	0.4	0	0.4	27.1	18.2	9.6	7.1	1	0.4	0.2	1.1	0.5	0.3	1	0	0.4	0	0.3
AgB23	1141370	1142933	AgB23_g074_t01	.	1564	1	Ankyrin repeat protein, putative			0	0	0	0	0.3	0	0	0	0	0	2	1.7	0.9	1	0.1	0.1	0	0.4	0.2	0.3	0.7	0	0	0	0
AgB23	1143059	1143526	AgB23_g075_t01	.	468	1	hypothetical protein			0	0	0	0	0.2	0.5	0.1	0	0	0	4	5.6	1.8	0.9	0.1	0.1	0	0.1	0	0.1	1	0	0.1	0	0
AgB23	1143771	1144232	AgB23_g076_t01	.	462	1	hypothetical protein			0	0	0	0.1	0.2	0.3	0	0	0	0	0.9	0.5	0.1	0.2	0.2	0.1	0	0.4	0.2	0.1	0.4	0	0	0	0
AgB23	1144318	1146029	AgB23_g077_t01	.	1712	1	Ankyrin repeat protein, putative			0.2	0	0.1	0.1	0.7	0.7	0	0.1	0.1	0	13.3	14.4	6.3	4.7	0.3	0.2	0	0.5	0.3	0.3	1.6	0	0	0	0
AgB23	1147746	1152012	AgB23_g078_t01	-	1538	4	hypothetical protein	PgE236_g002_t01	MSTRG.18630.1,MSTRG.20597.1	2.4	4.6	3.1	0	3.1	0.8	0.1	0.1	0.4	0.1	0.5	0.7	0.7	0.7	1.5	0.7	0.7	0.1	0.2	0.2	0.1	0	0.1	0	0.2
AgB23	1159279	1169129	AgB23_g079_t04	-	3582	11	h(+) cl(-) exchange transporter 3			18.2	5.8	6.5	1.4	3.4	20.7	7.5	7.7	2.2	7.7	13.2	11.7	10.9	15.7	70.2	108.1	73.2	29.5	18.6	21.6	21	11.1	8.3	6.3	4.5
AgB23	1169472	1171003	AgB23_g080_t01	-	484	3	H(+)/Cl(-) exchange transporter 3			24.9	6.2	9.6	2.3	5.5	43.8	16.5	15.1	2.5	1.2	2.2	2.1	4.7	6.9	15.2	25.4	21.9	10.8	6.5	6.9	8.2	0	2.8	1.5	2
AgB23	1182171	1191966	AgB23_g081_t02	+	2326	11	baculoviral iap repeat-containing protein 6			23.6	23.5	6.8	2.1	5.1	33	22.5	23.3	7.4	4.7	2.4	2.7	4.5	5.2	28.7	36.7	26.5	10.8	5.3	5	5.5	0.7	1.2	0.9	0.9
AgB23	1201579	1202350	AgB23_g082_t01	.	772	1	hypothetical protein			2.8	6.9	0.5	0	0	2	1.4	0.9	0.1	0.3	0.5	1.2	1.2	1	3.1	4.1	2.5	0.7	0.1	0.3	0.6	0	0	0	0
AgB24	1572	4670	AgB24_g001_t01	-	571	4	Leucine-rich repeat-containing protein 68			14.5	6.3	4	3.2	4.4	13.5	7.6	7.3	2.5	0.4	0.7	0.9	1.2	2.3	3.4	4	5.9	3.4	4	4.7	3.7	15.1	1.1	0.8	1.2
AgB24	22583	26232	AgB24_g002_t02	+	943	2	hypothetical protein			117.5	457.9	291.5	5.9	33.7	0.5	0.3	0.3	0.9	0.3	0.8	0.7	0.7	0.6	1.5	1.3	0.9	0	0	0	0	0	0.7	0	0.5
AgB24	28227	39290	AgB24_g003_t06	-	3586	8	N-glycosidase R617	PgB33_g007_t02	MSTRG.21627.1,MSTRG.22068.3,MSTRG.2303.3,MSTRG.22763.14	71.5	8.8	1.5	0.1	11.6	5.2	5	4.1	0.1	0.2	2.8	3.9	5.1	5.7	19	28.5	15.6	1.8	0.4	0.3	0.2	0	0.4	0	0
AgB24	39763	52038	AgB24_g004_t05	-	3196	9	Palmitoyltransferase ZDHHC15	PgE185_g001_t04	MSTRG.18619.1,MSTRG.18619.1	41.1	51	5.7	0.4	2	0.2	0.2	0.1	0.2	0.1	0.7	0.4	0.5	0.3	0.4	0.6	0.1	0	0	0	0	0	0.2	0	0.1
AgB24	53715	69645	AgB24_g005_t05	-	2569	13	Glutaminase	PgE216_g001_t03,PgE167_g001_t01	MSTRG.21923.1,MSTRG.21923.1	109.4	327.4	40.5	1.5	9.7	0.9	0.5	0.4	0.3	0.1	0.5	0.9	0.5	1	2.1	1.9	1	0.1	0	0	0.1	0	0.6	0	0.1
AgB24	69805	76752	AgB24_g006_t02	+	3055	6	Protein CASC3		MSTRG.16355.1	9.4	6.4	0.7	0.1	0.3	13	9.6	9.1	1.4	2.8	9.3	9.1	9	7.7	3.9	2.6	1	0.2	0	0.1	0	0	0.3	0.3	0
AgB24	80718	88883	AgB24_g007_t01	+	5979	4	hypothetical protein	PgB38_g006_t02,PgE056_g001_t01		6.5	6	1.1	0.1	1.1	3.4	2.3	2.2	0.5	0.8	2.5	2.7	2.5	3.6	7.1	7.1	3.2	0.7	0.3	0.2	0.3	0	0.2	0.1	0
AgB25	491277	499352	AgB25_g027_t03	+	8076	1	Tau-tubulin kinase 2, partial			5.2	19.7	1.7	0.1	0.3	2.8	2.1	1.9	0.2	0.8	3.8	2.3	1.9	2.8	5.6	5.7	4.8	1.5	0.9	0.7	0.7	0	0.3	0.1	0
AgB25	527052	532118	AgB25_g028_t12	+	5067	1	Neurofilament heavy polypeptide			1.4	2.7	0.3	0	0.1	1.2	0.8	0.7	0.2	0.3	1.2	1.3	0.9	1.3	7.4	6.7	6.5	1.6	0.2	0.4	0.3	0.3	0.1	0	0
AgB25	524767	532081	AgB25_g029_t01	-	1209	2	hypothetical protein			4.5	6.7	0.9	0	0.7	4.4	1.8	2.7	1	0.8	6.7	5.6	6.5	8	11.7	11	12.1	3	0.5	0.9	1.1	0	0.5	0.2	0
AgB26	6616	19318	AgB26_g001_t02	+	1513	11	Serine/threonine-protein kinase	PgB22_g041_t04,PgB25_g018_t01,PgB10_g103_t01,PgE078_g001_t01,PgE021_g005_t04,PgE232_g001_t04,PgE149_g003_t02,PgE156_g001_t11,PgE111_g002_t03,PgB02X_g220_t02,PgE059_g007_t01,PgB02X_g221_t01,PgB37_g005_t03	MSTRG.20059.1,MSTRG.23426.4,MSTRG.23426.4,MSTRG.16874.1,MSTRG.22376.1,MSTRG.22376.1,MSTRG.17769.3,MSTRG.22167.7,MSTRG.22673.1,MSTRG.23052.1,MSTRG.23846.1,MSTRG.22718.1,MSTRG.13365.1,MSTRG.21667.1,MSTRG.20353.1,MSTRG.21745.1,MSTRG.13368.2,MSTRG.20782.13,MSTRG.20782.13,MSTRG.21747.2,MSTRG.19589.1,MSTRG.22403.2,MSTRG.18753.1,MSTRG.18388.5,MSTRG.23425.1,MSTRG.21615.1,MSTRG.20409.5,MSTRG.17765.1,MSTRG…	48.8	56.8	5.4	0.2	1.8	0.8	1	0.8	0.3	0.6	4.7	4.1	3.7	6	3.8	2.9	0.8	0.1	0.1	0	0	0	0.4	0.1	0.2
AgB27X	357307	366086	AgB27X_g021_t05	+	2318	8	Ubiquitin carboxyl-terminal hydrolase 7	PgB22_g042_t04,PgE053_g002_t04	MSTRG.21577.15,MSTRG.20880.1,MSTRG.20929.1	1.3	0.1	0.2	0	0.5	9.5	6.7	6	2.6	3.3	22.1	16.2	13.1	16.2	15.6	16.2	7.2	1.5	0.6	0.6	0.6	0.7	1	0.4	0
AgB27X	366767	370790	AgB27X_g022_t01	-	2255	3	Tubulin beta-1 chain, partial			1.7	0.1	0	0	0.1	0.5	0.5	0.6	0.6	1	7	3.4	3.9	3.7	3.2	2.2	2	0.5	0.1	0.1	0.2	0	0.1	0	0
AgB27X	371979	374167	AgB27X_g023_t01	+	584	3	Import receptor subunit TOM70			4.3	0.2	1	2.1	3.2	9.1	6.8	6.8	5.1	2.6	5.6	5.7	2.8	7.2	14.4	13.6	7.6	6	6.3	5.6	4.8	5.9	2.8	1.1	2.5
AgB28X	70845	75663	AgB28X_g007_t01	+	4060	2	centromere-associated protein e			8.1	0	0	0	1.7	4.1	6.2	5.8	0.5	0.9	4.3	3.1	3	3.9	3.5	2.2	1.5	0.8	0.6	0.5	0.6	0.4	0.2	0.1	0.1
AgB28X	77936	89447	AgB28X_g008_t02	-	3432	8	fizzy-related protein-like protein	PgB27X_g010_t06,PgB27X_g010_t06		1.9	0.5	0.1	0	0.1	0	0	0.1	0	0	0.5	0.7	0.4	0.7	3	1	0.3	0	0	0	0	0	0	0	0
AgB28X	96738	109514	AgB28X_g009_t02	-	1713	8	hypothetical protein			28.5	2.6	0.6	0.1	4.6	58.7	33.8	33	5.9	16.1	69.7	100.2	61.2	51.7	25.5	20.8	9	1	0.1	0.6	0.4	0	1.5	1.3	0
AgB28X	113041	127162	AgB28X_g010_t01	-	1742	7	protein smg9	PgE457_g001_t01		12.2	1.6	0.7	0.4	2.3	113.5	102.1	100.1	10.6	9	43.2	35	39	47.2	16.1	14	6.3	1.2	0.3	0.5	0.6	0	2.5	1.2	0
AgB28X	134616	145407	AgB28X_g011_t05	-	1889	8	transcription elongation factor s-ii		MSTRG.23258.2,MSTRG.22307.1	8.9	1.4	0.7	0	3.9	8.1	4.2	4.2	0.9	1.5	5.9	2.9	1.3	1.4	2.7	0.9	0.3	0	0.1	0.1	0	0	0.3	0.2	0
AgB28X	150320	156781	AgB28X_g012_t01	-	1615	4	Casein kinase II subunit beta	PgE376_g001_t01		4.6	0.4	0.9	0.2	1	2.7	1.9	1.5	0.5	0.6	3	3.3	2.1	4.1	3.8	2.7	1	1.9	1.8	1.2	1	1.1	0.2	0.4	0.3
AgB28X	160794	161199	AgB28X_g013_t01	.	406	1	hypothetical protein			0	0	0	0	0	0	0	0	0	0	0	0	0	0.1	0.9	0.5	0	0	0	0	0	0	0	0	0
AgB28X	168508	172980	AgB28X_g014_t01	.	4473	1	hypothetical protein		MSTRG.23102.3,MSTRG.16579.2,MSTRG.4189.1,MSTRG.20618.2,MSTRG.17223.2,MSTRG.21314.2,MSTRG.21314.2,MSTRG.22164.10,MSTRG.22164.10,MSTRG.23536.6,MSTRG.23537.1,MSTRG.22622.1,MSTRG.24101.5,MSTRG.20763.2,MSTRG.22623.1,MSTRG.20765.5,MSTRG.21621.1,MSTRG.23917.1,MSTRG.23187.3,MSTRG.18838.3,MSTRG.22340.1	0.5	0.1	0	0	0.3	0.7	0.6	0.5	0.3	1.3	8.1	8.3	8.7	7.4	4.3	2.1	0.8	0	0	0	0	0	0.2	0.1	0
AgB28X	173100	177909	AgB28X_g015_t01	-	4810	1	zinc c2h2 type family protein			1.7	0.4	0	0	0.1	2	0.6	0.3	0.2	1.2	6.6	5	3.4	6.5	6.2	2.6	1.2	0.2	0	0	0.1	0.4	0.4	0.1	0
AgB28X	177577	180224	AgB28X_g016_t01	+	958	5	zinc c2h2 type family protein	PgB28_g015_t01,PgE157_g001_t01,PgE044_g003_t01		2.1	0.2	0	0	0.1	3.4	0.6	0.2	0	0	0.1	0	0.1	0	0	0.1	0.1	0	0	0	0	0	0	0	0
AgB28X	181649	181950	AgB28X_g017_t01	.	302	1	hypothetical protein			0.4	0	0	0	0.2	1.9	0.1	0.3	0	0	0	0	0	0	0	0.1	0	0	0	0	0	0	0	0	0
AgB28X	192415	193159	AgB28X_g018_t01	.	745	1	hypothetical protein			1.8	0	0	0	0	0.6	0.1	0.2	0	0	0.3	0.1	0	0.1	0.8	0.1	1	0	0	0	0	0	0	0	0
AgB28X	197074	201530	AgB28X_g019_t01	-	1125	8	zinc c2h2 type family protein	PgB28_g015_t01,PgE157_g001_t01,PgE044_g003_t01,PgE272_g001_t01		0.8	0.3	0	0	0.1	0.6	0.3	0.3	0	0	0.1	0.1	0	0	0.2	0	0	0	0	0	0	0	0	0	0
AgB28X	201763	202295	AgB28X_g020_t01	.	533	1	hypothetical protein			0.5	0.7	0.1	0	0.1	0.2	0	0.2	0	0	0.9	0.6	0	0.2	0.1	0	0	0	0	0.1	0.2	0	0.1	0	0
AgB28X	216781	235395	AgB28X_g021_t03	-	4283	13	Cytoplasmic polyadenylation element-binding protein 3	PgE096_g001_t04,PgE203_g001_t02,PgB41X_g004_t04	MSTRG.23108.1,MSTRG.23046.2,MSTRG.18758.3,MSTRG.18758.3,MSTRG.18758.3	13.7	0.8	0.4	0	3	36.2	24.4	23.4	4.8	2.5	23.6	19.8	20.5	24.9	21.6	16.2	6.4	1	0.4	0.3	0.3	0	0.6	0.3	0
AgB28X	236173	244851	AgB28X_g022_t01	+	1758	6	CCR4-NOT transcription complex subunit 2	PgE475_g001_t01,PgE616_g001_t01	MSTRG.20589.2,MSTRG.20589.2	36.2	3.5	1.8	0.5	9.2	62.4	78.6	69.2	7.8	16	58.9	42.8	25.7	44.2	44	38.7	26.1	2.7	0.9	0.6	1.1	0	3.5	2.3	0.1
AgB28X	258272	279203	AgB28X_g023_t07	-	3435	12	Abhydrolase domain-containing protein	PgE166_g001_t05,PgE355_g001_t02	MSTRG.20910.28,MSTRG.20910.28,MSTRG.22556.1,MSTRG.22246.3,MSTRG.23195.2	18.4	42	5.5	0.1	1.7	2.3	1.7	1.8	1.8	0.8	7.7	6.7	4.9	9.1	3.9	2.1	0.7	0.1	0	0.1	0.1	0	0.5	0.1	0
AgB28X	280451	290995	AgB28X_g024_t01	-	8218	3	hypothetical protein			3.2	8	0.9	0.1	0.2	0.2	0.5	0.5	0	1.6	12	11.5	8.7	6.3	6.4	3.4	1.7	0.1	0	0	0	0	0.1	0	0
AgB28X	280451	288363	AgB28X_g025_t02	+	4459	4	hypothetical protein	PgE505_g001_t02	MSTRG.21301.4	3.6	10.1	1	0	0.4	0.2	0.3	0.2	0	0.2	1.2	1.6	1.1	1.4	2.1	0.9	0.6	0	0	0	0	0	0.1	0	0
AgB28X	291825	292646	AgB28X_g026_t01	-	303	2	hypothetical protein		MSTRG.21695.11,MSTRG.21625.5	1.2	3.6	0.5	0	0	0	0	0.1	0	0	0	0	0	0	0.7	0.1	0	0	0	0	0	0	0	0	0
AgB28X	301855	303077	AgB28X_g027_t01	+	357	3	peptidyl-prolyl cis-trans isomerase 3	PgE064_g002_t02	MSTRG.22178.1,MSTRG.21630.5	2	0.2	0.1	0	0	0	0	0	0	0	0	0	0	0.3	0.1	0.2	0	0	0	0.1	0	0	0	0	0
AgB29	24210	32800	AgB29_g001_t15	-	2166	4	Tau-tubulin kinase 2	PgE034_g003_t03	MSTRG.22403.2	25.8	228.8	95.9	0.8	9.8	4.6	3.8	3.1	1	0.7	3.1	3	3.1	3.6	8.8	7.9	11.7	1.8	0.4	0.4	0.7	0	1.2	0	0.1
AgB29	826	16352	AgB29_g002_t01	+	5601	10	ATP-dependent RNA helicase DDX19A	PgE228_g001_t01,PgB09_g100_t03,PgE543_g001_t01,PgE246_g002_t01	MSTRG.19776.5,MSTRG.19777.1	16.5	30.9	9.1	0.1	2.3	18.6	12.1	12.3	1.7	1.4	11.4	11.9	11.2	18.7	28	32.5	15	3.4	0.7	0.7	0.9	0.3	1.1	0.4	0
AgB29	32462	48348	AgB29_g003_t02	+	1955	7	hypothetical protein	PgE034_g002_t03		31.5	22.4	2.4	0.1	0.7	18.5	18.6	17.7	3.4	3.1	22.7	17.3	6.7	23.8	27.5	26.6	8.2	1.3	0.3	0.1	0.6	0	1.3	0.5	0.1
AgB29	73319	81546	AgB29_g004_t23	+	1663	5	Sodium/chloride cotransporter 3	PgE034_g002_t03		15.7	10.3	0.9	0	3.3	25.2	16.3	15.6	2.7	1.4	9.6	10.7	12.4	16	13.8	12.5	7.9	1.5	0.4	0.6	0.7	0	0.6	0.6	0
AgB29	76806	84288	AgB29_g005_t02	-	6057	5	Sodium/chloride cotransporter 3	PgE039_g003_t02	MSTRG.12983.2,MSTRG.12984.2	4.7	2.9	0.3	0	1.3	4.2	3.2	2.8	0.7	0.4	2.9	3	3.9	3.9	7.9	11.3	9.4	1.4	0.4	0.2	0.2	0	0.4	0.1	0
AgB29	88013	104999	AgB29_g006_t04	-	2385	11	Cyclin-B1-2	PgE331_g001_t01,PgE034_g001_t01,PgE193_g002_t04	MSTRG.23118.1	7.5	3.7	0.5	0	1.9	14.1	8.4	10.1	3.5	3.9	10.9	11.8	11.8	31.3	31.3	29.7	14	7.4	2.4	2	3.5	0.7	1	0.4	0
AgB29	101967	102278	AgB29_g007_t01	.	312	1	hypothetical protein			4.4	6	0.5	0	0.3	4.5	4.6	3.2	0	0	0	0	0	0.2	1.8	2.5	1.6	0.1	0	0.2	0	0	0	0	0
AgB29	112963	117884	AgB29_g008_t01	-	1655	3	Ran-binding protein 10, partial			14.3	5.8	0.9	0	1.4	10.1	4.5	4.3	0.3	0.2	1.8	2.1	1.4	2.9	19.9	21.3	27.2	4.8	1.8	2	1.8	0	0.3	0.1	0.1
AgB29	126524	154055	AgB29_g009_t10	+	4466	19	hypothetical protein	PgE026_g003_t02,PgE026_g002_t01	MSTRG.1828.1	53.8	2.7	1.2	0.2	6.4	74	52.8	54.1	9.2	4.8	4.1	4	5.1	7.1	8.1	18.6	14.4	2.9	0.7	0.6	0.8	0.8	0.7	0.7	0
AgB29	122823	129219	AgB29_g010_t04	-	5178	3	40S ribosomal protein S19G, partial	PgE183_g001_t01		11.9	5.4	1	0	1.2	4.7	5.2	4.4	1.9	3.8	26.2	20.1	15.3	15.8	15.7	15.8	18.5	5.5	1.4	0.6	0.8	0.7	1.3	0.5	0.1
AgB29	154376	159190	AgB29_g011_t02	-	640	5	hypothetical protein	PgE026_g001_t10	MSTRG.22959.2,MSTRG.22959.2,MSTRG.20175.1,MSTRG.23741.2	126.9	193.3	97.4	1.2	13.7	0.2	0	0.1	0.9	0.7	2.3	1.3	1.5	1.6	5.3	3.8	2.1	0.4	0.1	0.1	0.2	0	1.6	0.1	0.7
AgB29	161690	170846	AgB29_g012_t06	-	1042	8	hypothetical protein	PgE183_g002_t04	MSTRG.7421.1,MSTRG.18395.2,MSTRG.23675.1	77.2	116.5	61.2	1.3	11.9	3.4	2.5	2.6	0.6	1.9	14.2	16.8	13.9	10.6	61	62	25.2	1.4	0.6	0.2	0.3	0	1.5	0.1	0.5
AgB29	164422	171600	AgB29_g013_t01	+	6519	3	hypothetical protein			3.2	2.9	1.2	0	0.7	0.6	0.3	0.4	0.1	0.1	1.4	1.8	1.7	2.1	5.6	3.7	2.3	0.3	0.1	0	0.1	0	0.1	0	0
AgB29	172743	175617	AgB29_g014_t01	+	438	4	40S ribosomal protein S19G	PgE183_g001_t01		78.5	14.7	2.8	0.2	19.1	43.1	45.8	37.7	12.1	42.6	232.7	161.3	81.6	150.5	186.2	151.6	60.1	66.9	23.4	11.1	11.1	3.9	13.5	7.2	1.5
AgB29	176482	190515	AgB29_g015_t05	-	13836	2	fert-1 protein			5.2	13.1	4.7	0	0.9	0.8	0.8	0.8	0.2	0.1	4.3	5.5	5.1	5.5	10.7	20.6	25.1	6.1	1	0.4	0.2	0	0.8	0.1	0.1
AgB29	183895	198957	AgB29_g016_t02	+	3921	9	Tyrosine-protein kinase kin-31	PgE088_g002_t01,PgE277_g001_t02,PgB37_g005_t03,PgE056_g003_t06,PgB25_g019_t01,PgE063_g004_t02,PgE002_g006_t01,PgE001_g002_t01,PgE080_g003_t01,PgE222_g001_t02,PgE028_g001_t03,PgE003_g004_t02	MSTRG.23125.4,MSTRG.23125.4,MSTRG.23796.1,MSTRG.23400.4,MSTRG.7427.1,MSTRG.17933.1,MSTRG.23443.1,MSTRG.19994.2,MSTRG.19994.2,MSTRG.18317.15,MSTRG.21580.2,MSTRG.22069.3,MSTRG.21090.8,MSTRG.20759.5,MSTRG.22241.1,MSTRG.16581.1,MSTRG.21941.1,MSTRG.19573.8,MSTRG.8296.2,MSTRG.23481.2,MSTRG.20187.3,MSTRG.11670.1	21.2	91.6	40.1	0.4	4.6	0.6	0.5	0.6	0.2	0.2	3.4	4.3	6	7.3	18.4	13.7	4.9	0.4	0.1	0.1	0.1	0	0.3	0	0
AgB29	199400	216177	AgB29_g017_t04	-	2171	14	Serine/threonine-protein phosphatase PP1 isozyme 7	PgE204_g001_t01,PgE088_g001_t01,PgE056_g002_t02,PgE043_g004_t02,PgE094_g001_t03,PgE215_g001_t01,PgE014_g005_t01,PgE008_g005_t01	MSTRG.22337.1,MSTRG.22900.4,MSTRG.21515.4,MSTRG.21515.4,MSTRG.23250.2,MSTRG.7423.3,MSTRG.21870.4,MSTRG.21870.4,MSTRG.23946.1,MSTRG.13356.2	101.4	323.9	68	1.1	16	6.7	7.7	7.2	3.5	3.2	19.9	14.1	9.1	20.9	10.5	8.4	2.2	0.3	0.2	0.3	0.3	0	1.3	0.1	0.1
AgB29	220050	232620	AgB29_g018_t03	+	8098	8	RNA-binding protein Raly	PgE135_g001_t01,PgE021_g006_t03	MSTRG.21310.3,MSTRG.18748.3	17.5	19	2.4	0.1	1.4	2.9	3	3	2.1	4	18.2	12	8.2	14.9	12.6	9	3.4	0.7	0.2	0.2	0.4	0	0.7	0.1	0
AgB29	237238	239868	AgB29_g019_t07	-	985	3	Sex determination protein fox-1	PgE407_g001_t02	MSTRG.3004.1,MSTRG.2266.1,MSTRG.18745.11,MSTRG.21517.12,MSTRG.23504.1	6.5	1.2	0.1	0	2.5	15.9	9.9	9.8	3.7	7.4	28.4	45.9	36.8	39.4	22.4	15.9	8.6	2	0.3	0.6	0.8	0	0.9	0.1	0
AgB29	254124	257413	AgB29_g020_t02	+	686	3	Serine/threonine-protein kinase		MSTRG.20059.1,MSTRG.23426.4,MSTRG.23426.4,MSTRG.23425.1	18.4	15.2	1.4	0	1.4	1	0.6	0.6	0.5	0.3	3	1.4	1.3	2.8	1.7	2	0.4	0.2	0.1	0	0.1	0	0.2	0	0.1
AgB30	206	21002	AgB30_g001_t04	-	2648	13	Poly(A) RNA polymerase gld-2	PgB08_g097_t01,PgB04_g195_t01	MSTRG.23589.2,MSTRG.18398.1	85.6	77.8	9.3	0.4	11.2	97.1	57.4	57.6	10.8	7.1	26.3	28.5	39.2	21.8	14.2	12.2	13	1.2	0.3	0.5	0.7	0	0.4	0.3	0
AgB31X	5514	7623	AgB31X_g001_t03	+	593	4	putative serine threonine-protein kinase			5	10.7	2	0	0.3	2.3	2.4	2.6	1.9	1.3	2.3	1.6	3.2	5.9	3.2	2.1	1	0.3	0.3	0.2	0.2	0	0.2	0	0
AgB31X	15661	19928	AgB31X_g002_t02	-	1148	7	zinc c2h2 type family protein			0.9	0.4	0.2	0.1	0	4.4	0.9	0.6	0	0	0	0.2	0	0	0.1	0	0.1	0	0	0	0	0	0	0	0
AgB31X	23768	49669	AgB31X_g003_t01	-	24186	2	atp-dependent rna helicase cgh-1	PgE363_g002_t01,PgE660_g001_t01	MSTRG.16484.4,MSTRG.21902.2	7.9	7	0.9	0.1	0.4	4.2	2.6	2.7	0.5	1	6.3	4.4	3	4.3	3.3	1.9	0.8	0.2	0.1	0.1	0.2	0.1	0.2	0.1	0.5
AgB31X	26628	31689	AgB31X_g004_t01	+	535	2	hypothetical protein			16.4	23.8	4.7	0.6	0.7	0.7	0.3	0.1	0	0.2	0.1	0.4	0	0.1	0.1	0	0	0	0	0	0	0	0.3	0	0.1
AgB31X	42726	58349	AgB31X_g005_t01	+	6656	10	ATP-dependent RNA helicase cgh-1	PgB09_g100_t03,PgE543_g001_t01,PgE228_g001_t01	MSTRG.19776.5,MSTRG.19777.1,MSTRG.19777.1	64.9	21.7	2.6	0.2	2.5	33.8	23.5	23.3	4.1	5.4	48.7	46.9	44.2	44.1	42.7	38.8	13.7	1.2	0.3	0.4	0.6	0.3	1.1	0.5	0
AgB31X	57565	67390	AgB31X_g006_t01	-	1025	8	hypothetical protein			9.1	38.7	4.3	0	1.1	0.1	0	0	0.3	0	0.1	0.2	0.3	0.2	0.3	0.2	0.2	0	0	0	0	0	0.5	0	0.2
AgB31X	66728	67250	AgB31X_g007_t01	.	523	1	hypothetical protein			0.8	0.9	0.1	0	0	0	0	0	0	0	0.1	0	0	0	0	0	0	0	0	0	0	0	0	0	0
AgB31X	78405	86873	AgB31X_g008_t10	+	1139	6	Phosphoenolpyruvate carboxykinase GTP	PgE047_g002_t03	MSTRG.21638.1,MSTRG.21638.1,MSTRG.21746.1	54.1	110.1	13.1	0.3	5.2	0	0.2	0.1	0	0.5	0.4	1.2	0.5	1.5	0.9	0.4	0	0	0	0	0	0	0.6	0.1	0.1
AgB31X	92813	93379	AgB31X_g009_t01	.	567	1	hypothetical protein			0.3	1.3	0.2	0	0	0	0	0	0	0	0	0	0	0	0.2	0.1	0	0	0	0	0	0	0	0	0
AgB31X	98817	106920	AgB31X_g010_t05	+	1123	7	hypothetical protein	PgE252_g001_t04	MSTRG.22983.6,MSTRG.22983.6	109.8	269.6	47.3	0.7	9.8	0.2	0.2	0	0.2	0.2	0.3	0.2	0.5	0.6	0.4	0.4	0	0.1	0	0	0	0	0.6	0	0.2
AgB31X	108879	118644	AgB31X_g011_t01	+	2909	8	Succinate dehydrogenase ubiquinone iron-sulfur subunit		MSTRG.22484.1	119.7	102.5	12.2	0.4	4.3	0.5	0.7	0.5	0.1	0.2	3.5	3.7	3.4	3.9	5.1	4	2.2	0.2	0	0	0.1	0	0.3	0	0.2
AgB31X	113243	115210	AgB31X_g012_t01	-	420	2	Succinate dehydrogenase ubiquinone iron-sulfur subunit		MSTRG.22484.1,MSTRG.22484.1	75.4	75.8	8.3	0.3	4.3	0.2	0.8	0.5	0	0.1	1.6	0.5	0.8	1.3	2.5	1.5	1.2	0	0.1	0	0.1	0	0	0	0
AgB32	3525	5535	AgB32_g001_t01	-	588	5	zinc c2h2 type family protein	PgE044_g003_t01,PgB28_g015_t01,PgE157_g001_t01,PgE272_g001_t01		1.1	0.3	0.2	0	0	0.5	0.2	0.1	0	0	0	0	0	0	0.1	0.1	0.2	0	0	0.1	0	0	0	0	0
AgB32	6101	7414	AgB32_g002_t01	-	594	3	zinc c2h2 type family protein	PgE157_g001_t01,PgB28_g015_t01,PgE044_g003_t01		0.7	0.2	0.1	0	0.1	0.5	0.2	0.3	0	0	0.1	0	0	0.1	0.2	0	0	0	0	0	0	0	0	0	0
AgB32	15203	27568	AgB32_g003_t04	+	4768	10	Endophilin-A2, partial	PgE077_g004_t01	MSTRG.9122.1,MSTRG.21882.1	4.1	1.8	0.3	0.1	1.6	7	6	5.4	2	3.7	14.3	13.2	14.6	15.5	12.3	11.9	5.2	1.3	0.4	0.4	0.4	0.4	0.7	0.3	0
AgB32	23982	44905	AgB32_g004_t04	-	3393	17	Monocarboxylate transporter 13, partial	PgE077_g003_t03	MSTRG.24307.1,MSTRG.24199.1	60.8	44.7	5.5	0.2	8.3	21.7	18.6	18	3.8	7	45.3	38.7	42.1	44.5	29.6	26.5	15.5	3.5	1.1	1.1	1.4	0	1.6	0.4	0.1
AgB32	47834	60562	AgB32_g005_t04	-	4871	14	Sodium-dependent phosphate transporter 1	PgE132_g002_t04,PgE077_g001_t01		18.5	22.8	3.5	0.2	1.3	3.8	3.2	2.8	1.7	1.8	4.8	3.3	2.1	5.5	5.1	2.4	0.6	0.1	0.1	0.1	0.3	0.4	3.6	3.3	7.8
AgB32	65499	94513	AgB32_g006_t01	+	5706	21	Solute carrier family 2	PgB45_g001_t01,PgE073_g001_t02,PgE004_g001_t02	MSTRG.16871.4,MSTRG.23266.3,MSTRG.21333.2,MSTRG.21333.2,MSTRG.21333.2	103.9	181.1	18.1	0.7	4.6	1.4	2.2	2	0.6	0.6	2.1	3.1	2.8	2.6	3.2	2.4	0.8	0.1	0	0	0.1	0	0.5	0	0.1
AgB33	87622	98288	AgB33_g007_t02	-	2335	8	Serine/threonine-protein kinase	PgB25_g018_t01,PgE021_g005_t04,PgB22_g041_t04,PgB10_g103_t01,PgE078_g001_t01,PgE232_g001_t04,PgE156_g001_t11,PgE111_g002_t03,PgE149_g003_t02,PgB25_g019_t01,PgB41X_g003_t01,PgE397_g001_t01,PgE498_g001_t01	MSTRG.22167.7,MSTRG.23846.1,MSTRG.16874.1,MSTRG.17769.3,MSTRG.22673.1,MSTRG.20059.1,MSTRG.20782.13,MSTRG.20782.13,MSTRG.13368.2,MSTRG.22376.1,MSTRG.22718.1,MSTRG.23426.4,MSTRG.21667.1,MSTRG.13365.1,MSTRG.21747.2,MSTRG.20353.1,MSTRG.21745.1,MSTRG.19589.1,MSTRG.23052.1,MSTRG.18753.1,MSTRG.18388.5,MSTRG.21615.1,MSTRG.17766.1,MSTRG.22403.2,MSTRG.22069.3,MSTRG.20409.5,MSTRG.21655.5,MSTRG.17765.1	6.7	17.7	3.6	0	0.6	0.1	0	0.1	0.1	0	0.3	0.3	0.3	0.3	0.4	0.2	0.4	0	0	0	0	0	0.1	0	0
AgB33	98654	106591	AgB33_g008_t01	+	2536	5	tyrosine-protein kinase fps85d	PgB25_g019_t01,PgE056_g003_t06,PgB37_g005_t03,PgE088_g002_t01,PgE277_g001_t02	MSTRG.23481.2,MSTRG.17933.1,MSTRG.11670.1,MSTRG.11670.1,MSTRG.23443.1,MSTRG.19994.2,MSTRG.23400.4,MSTRG.23125.4,MSTRG.21580.2	18.5	25.7	4.3	0.3	1.4	0.1	0.1	0	0	0.1	0.5	0.5	0.1	1.2	2.8	2.1	0.5	0.1	0	0	0	0	0.2	0	0.1
AgB34	5904	20619	AgB34_g001_t04	+	2889	10	p40	PgE026_g004_t05,PgE026_g004_t05	MSTRG.22412.1,MSTRG.22412.1,MSTRG.20646.1,MSTRG.20646.1,MSTRG.22406.1,MSTRG.20645.1	22.9	43.8	7	0.2	2.3	0.8	0.4	0.5	0.2	0.1	0.4	0.5	0.7	1.4	2.9	2.3	2.6	0.5	0.2	0.2	0.3	0	0.2	0	0.1
AgB34	22783	25869	AgB34_g002_t01	-	2965	2	hypothetical protein		MSTRG.20765.5,MSTRG.13373.1	38.7	27.4	112.7	3.8	221.3	6.6	12.3	10.6	18.9	1.5	7.9	3.7	2.9	1.4	6.4	5	5.5	5.4	4.5	4.3	4.5	1.2	1.8	1	0.5
AgB34	29905	35034	AgB34_g003_t01	-	615	6	cytoplasmic polyadenylation element-binding protein 3	PgE144_g001_t01,PgE096_g001_t04		5	1.1	0.5	0	1.9	3.8	1.3	1.1	0	0	1	1.7	0.9	2.3	5.7	3.3	4	0.5	0	0.3	0.4	0	0	0	0
AgB34	38738	46840	AgB34_g004_t01	-	1737	9	Succinyl-CoA:3-ketoacid-coenzyme A transferase	PgE133_g001_t03		9.1	2.7	2.5	0.6	2.5	204.1	198.3	184.5	12.3	16.3	36.6	43.3	47.7	32.8	33.3	42.8	31.7	2.6	0.7	0.7	0.9	0	5.1	5.8	0
AgB34	58640	74444	AgB34_g005_t05	-	3436	11	Tyrosine-protein kinase kin-31	PgE088_g002_t01,PgE277_g001_t02,PgB37_g005_t03,PgE056_g003_t06,PgB25_g019_t01,PgE395_g001_t01,PgE063_g004_t02,PgE002_g006_t01,PgE001_g002_t01,PgE080_g003_t01,PgE222_g001_t02,PgE021_g005_t04	MSTRG.23125.4,MSTRG.23125.4,MSTRG.23796.1,MSTRG.23400.4,MSTRG.7427.1,MSTRG.23443.1,MSTRG.17933.1,MSTRG.19994.2,MSTRG.19994.2,MSTRG.21580.2,MSTRG.18317.15,MSTRG.22069.3,MSTRG.21090.8,MSTRG.19573.8,MSTRG.22241.1,MSTRG.23481.2,MSTRG.16581.1,MSTRG.21941.1,MSTRG.20759.5,MSTRG.8296.2,MSTRG.11670.1,MSTRG.20409.5,MSTRG.20187.3	32.4	119.8	57.6	0.8	9.3	6.5	4.3	4.5	1.3	1.1	9.3	9	8.4	12.1	10.3	10.1	5.6	1.2	0.4	0.3	0.3	0	0.8	0.3	0.1
AgB35X	17334	37012	AgB35X_g003_t02	+	3875	14	Solute carrier family 40 member 1	PgE023_g003_t02,PgE023_g003_t02	MSTRG.22281.2,MSTRG.22281.2	39.4	100.7	9.7	0.4	6.7	16.9	17.9	16.4	5.5	4.7	28.3	19.6	12.8	25.7	38.8	31.4	11.8	3.2	0.4	0.7	0.9	0	1.4	0.5	0.1
AgB35X	39377	55891	AgB35X_g004_t04	+	1180	8	Import receptor subunit TOM40		MSTRG.22189.1	65.4	74.2	13.1	0.2	5.8	35.7	14.8	16.6	2.2	3.7	26.5	38.1	28	42.7	71.8	49.4	31.7	3.8	0.5	1	0.7	0	0.8	0.3	0
AgB36X	23196	42718	AgB36X_g004_t05	+	1095	9	hypothetical protein	PgB44_g001_t11	MSTRG.21073.4,MSTRG.21073.4	35.7	68.9	7.6	0.2	3	2.8	2.2	1.6	0.3	0.1	0.7	1.1	0.8	1.8	3.9	3.8	2.9	0.6	0.3	0.2	0	0	0.2	0	0
AgE01	1	3943	AgE01_g001_t02	+	3348	2	hypothetical protein			4.4	1.5	0.1	0.1	0.4	4.3	5.3	5.1	1.6	4.3	14.7	8.3	6.8	6.9	2.5	0.8	0.3	0.1	0.1	0.1	0	0	0.2	0	0
AgE01	15069	33571	AgE01_g002_t01	+	2847	14	Eukaryotic translation initiation factor 3 subunit D	PgE004_g004_t02	MSTRG.20605.9,MSTRG.24158.2,MSTRG.24158.2,MSTRG.20606.1	46.1	76	9.1	0.3	1.9	1.6	1.4	1	1.2	1.8	11.5	15.1	15.7	12.3	8	5.6	3.6	0.2	0	0.1	0.2	0	0.5	0	0
AgE01	43336	44014	AgE01_g003_t01	+	282	2	Histone acetyltransferase MYST4			2.8	12.4	2.4	0	0	0.5	0	0.3	0	0	0.6	1.9	1.3	1.5	4.3	3.3	1.5	0.4	0	0	0	0	0	0	0
AgE01	54180	85017	AgE01_g004_t02	-	9769	14	G2/mitotic-specific cyclin-B3	PgE004_g006_t01		8.9	4	1	0	2.2	8.7	4.8	5.2	1	1.6	7	8.3	7.3	8.5	5.2	3.7	2	0.2	0.1	0.1	0.2	0	0.3	0.2	0
AgE01	79114	96245	AgE01_g005_t02	+	8545	10	G2/mitotic-specific cyclin-B3	PgE193_g002_t04,PgE331_g001_t01	MSTRG.23118.1,MSTRG.23251.2,MSTRG.23251.2,MSTRG.23251.2,MSTRG.23251.2,MSTRG.23119.1	14.2	15.7	4.6	0	1.5	8.4	7.5	8	2.7	4.9	28	31.3	32.7	36.4	18.2	13.3	3.5	0.5	0.1	0.2	0.3	0	0.7	0.2	0
AgE01	88326	93932	AgE01_g006_t02	-	4493	3	Sperm-specific class P protein 32		MSTRG.4188.2,MSTRG.23343.1,MSTRG.20783.1,MSTRG.22604.2,MSTRG.20406.1,MSTRG.24141.2,MSTRG.23083.3	10.8	13.5	3	0.1	0.7	1.7	2.2	1.9	1	4.6	29.6	22.1	13.8	24.9	19.4	10	1.5	0.3	0.1	0.2	0.2	0.4	0.4	0.2	0
AgE01	95087	99828	AgE01_g007_t01	-	1634	5	an1-like zinc finger family protein	PgE193_g003_t02	MSTRG.23952.1,MSTRG.23374.1,MSTRG.23625.1,MSTRG.22387.5	91.6	51.7	8	0.5	7.3	20.6	50.9	40.2	6.2	8.9	46	53.6	63.5	36.2	22.8	20.2	11.4	1.1	0.3	0.2	0.6	0	1.5	0.4	0.2
AgE01	107486	116385	AgE01_g008_t02	-	1514	5	hypothetical protein			3.3	6	1.2	0.1	0.1	0	0	0	0	0.1	0.3	0.7	0.3	0.9	0.3	0.2	0	0	0	0	0	0	0	0	0
AgE01	160691	166355	AgE01_g009_t13	+	2935	4	proteasome activator complex subunit 4	PgE003_g001_t05,PgE176_g001_t01	MSTRG.21057.1,MSTRG.524.3,MSTRG.21621.1	6	15	0.9	0	0.1	0	0	0	0	0	0.2	0.2	0.2	0.3	0.7	0.3	0	0	0	0.1	0	0	0.1	0	0
AgE01	168846	183399	AgE01_g010_t01	+	5271	5	Ubiquitin-conjugating enzyme E2 L3	PgE030_g001_t02,PgE109_g003_t01,PgE109_g002_t01,PgE111_g001_t01	MSTRG.21511.1,MSTRG.21512.1,MSTRG.17394.1,MSTRG.18751.1,MSTRG.8297.2,MSTRG.13376.1,MSTRG.22259.5,MSTRG.1696.1,MSTRG.18545.1,MSTRG.7436.1,MSTRG.21589.1,MSTRG.16583.3	8.9	21.6	3.3	0	1.2	0.7	0.8	1.1	1.1	3.6	19.8	10.7	6.3	13.7	10.1	5.6	1.8	0.2	0	0	0.1	0	0.5	0.1	0
AgE01	180168	187933	AgE01_g011_t01	-	5310	4	hypothetical protein		MSTRG.22120.1,MSTRG.22122.1,MSTRG.22104.2	1.8	7	0.8	0	0.1	1.2	2.1	1.9	1.8	3.4	17.8	11.9	7.7	15.2	8.9	5.4	2	0.2	0	0.1	0.1	0	0.6	0.1	0
AgE01	183633	183945	AgE01_g012_t01	.	313	1	hypothetical protein			3.1	9.5	0.6	0	0.8	0	0.3	0.1	0	0	0	0	0	0.2	0	0	0	0	0	0	0	0	0	0	0
AgE01	186279	188010	AgE01_g013_t03	+	1732	1	hypothetical protein			1.2	5	0.4	0	0.1	0	0.1	0	0	0	0.2	0.1	0	0.1	0	0	0	0	0	0	0	0	0	0	0
AgE01	190925	196252	AgE01_g014_t01	-	2631	9	Tubulin alpha-2 chain	PgE274_g001_t02,PgE007_g001_t01,PgE014_g001_t07,PgE153_g002_t01,PgE040_g001_t07,PgE040_g001_t07,PgB35_g008_t03,PgE459_g001_t02,PgE261_g001_t01,PgE261_g002_t01,PgE261_g003_t01	MSTRG.21951.9,MSTRG.22771.4,MSTRG.22951.3,MSTRG.22951.3,MSTRG.19994.2,MSTRG.19994.2,MSTRG.19994.2,MSTRG.21949.2,MSTRG.21949.2,MSTRG.21949.2,MSTRG.21945.1,MSTRG.22952.1,MSTRG.20046.1,MSTRG.22953.1,MSTRG.22953.1	48.1	28.4	8	1.4	4.2	448.1	477.5	478.4	78.3	47.6	189	183.3	182.4	137.4	52.2	35.8	13.2	1.8	0.3	1	1.5	0	10.2	9	0.2
AgE01	198787	214397	AgE01_g015_t01	+	2457	13	hypothetical protein	PgE040_g002_t04	MSTRG.22978.2,MSTRG.22984.1,MSTRG.18246.3,MSTRG.24100.1,MSTRG.22781.1	29	80.7	8.4	0.2	1.8	0.1	0	0	0	0.1	0.1	0.4	0.5	0.2	0.5	0.6	0.2	0	0	0	0.1	0	0.3	0	0
AgE01	216913	226142	AgE01_g016_t01	+	1658	10	serine threonine-protein kinase	PgB22_g041_t04,PgB25_g018_t01,PgE040_g003_t12,PgE078_g001_t01,PgB10_g103_t01,PgE021_g005_t04,PgE232_g001_t04,PgE149_g003_t02,PgE156_g001_t11,PgE111_g002_t03	MSTRG.16874.1,MSTRG.20059.1,MSTRG.22376.1,MSTRG.22376.1,MSTRG.23426.4,MSTRG.23426.4,MSTRG.17769.3,MSTRG.22673.1,MSTRG.22167.7,MSTRG.23846.1,MSTRG.13368.2,MSTRG.21745.1,MSTRG.21667.1,MSTRG.22718.1,MSTRG.13365.1,MSTRG.23052.1,MSTRG.21747.2,MSTRG.20782.13,MSTRG.20782.13,MSTRG.20353.1,MSTRG.19589.1,MSTRG.18753.1,MSTRG.18388.5,MSTRG.22403.2,MSTRG.21615.1,MSTRG.17765.1	56	49.1	4.7	0.5	1.1	0.1	0.1	0	0	0.1	0.4	0.1	0.3	0.6	0.5	0.6	0	0.1	0	0	0	0	0	0	0.1
AgE01	226892	248585	AgE01_g017_t03	+	2029	11	regulator of microtubule dynamics protein 2	PgE412_g001_t01,PgB36X_g003_t01	MSTRG.18616.4,MSTRG.23278.1,MSTRG.23194.1,MSTRG.21516.2	287.7	562.5	67.9	3.3	25	1.5	1.5	1.2	0.5	0.5	2.1	3.7	8.3	3.4	4.9	4.9	9.5	1.3	0.5	0.1	0.3	0	1.3	0.1	0.5
AgE01	239353	246959	AgE01_g018_t05	-	1259	7	Phosphoribosyl pyrophosphate synthase-associated protein 2	PgE081_g002_t09	MSTRG.22488.5	63.5	26.6	4.2	0.3	4.8	25.3	18.6	18.9	5.2	4.2	28	23.7	21	25	14.7	10.3	2.9	0.3	0	0.1	0.3	0	1	0.3	0.1
AgE01	248840	260019	AgE01_g019_t01	-	3690	7	ADP,ATP carrier protein 1	PgE081_g004_t02,PgE636_g001_t02,PgE081_g006_t01,PgE081_g005_t01,PgB22_g038_t01	MSTRG.22206.1,MSTRG.22328.1	126.2	47.8	5.2	0.2	3.5	4.5	31.5	28.3	16.7	9	94.2	67.8	51.6	82.2	32.6	25.3	9.3	1.2	0.3	0.4	0.6	0	3.9	0.3	0.2
AgE01	259934	273473	AgE01_g020_t01	+	7780	6	Pyruvate dehydrogenase protein X component	PgE533_g001_t01,PgE718_g001_t01,PgE738_g001_t01		46.1	55.2	6.7	0.3	2.7	0.2	0.1	0.1	0.1	0	0.4	0.5	0.7	0.7	1.1	0.6	0.3	0.1	0	0	0	0	0.1	0	0.1
AgE01	266649	275722	AgE01_g021_t03	-	3357	7	u2 small nuclear ribonucleoprotein b	PgE469_g001_t01,PgE502_g001_t02		46.9	41.6	5.2	0.3	4.3	0.5	0.1	0	0.1	0.1	0.5	0.5	1.2	1	1.9	1	0.6	0.1	0	0	0.1	0	0.1	0	0.1
AgE01	277039	289856	AgE01_g022_t01	+	6046	6	hypothetical protein	PgE343_g001_t01		5.1	5.7	0.7	0	0.5	0.7	0.3	0.4	0.1	0.3	1.7	2	2	2.1	1.1	1.1	0.5	0	0	0	0.1	0	0.1	0	0
AgE01	306906	318375	AgE01_g023_t07	-	1822	10	hypothetical protein	PgE177_g001_t05,PgB32_g015_t04,PgE343_g002_t01,PgE074_g003_t01	MSTRG.22477.1,MSTRG.22476.1	40.2	46	3.5	0.1	1.3	0	0.1	0	0.1	0	0.4	0.5	0.9	0.4	0.7	0.4	0.3	0	0	0	0	0	0.2	0	0
AgE01	320351	333361	AgE01_g024_t03	-	2714	11	hypothetical protein	PgB32_g014_t01	MSTRG.23905.4,MSTRG.23905.4,MSTRG.17406.1,MSTRG.22700.1	14.8	6.3	4.1	1.3	1.4	216.5	412.5	388.1	120.7	141.2	480.9	381.8	218.3	323.5	70.8	23.1	6.5	1.6	0.7	0.9	1.7	0	12	4	0
AgE01	336366	340187	AgE01_g025_t01	+	1139	4	fact complex subunit ssrp1-a			145.4	13.8	3.8	0.7	11.1	164.4	144.4	144.5	42.7	93	539.5	759.1	840.3	413.9	437.5	311.6	208	18.7	3.5	5.8	6.9	0	14.7	6.5	0.2
AgE01	343693	367449	AgE01_g026_t01	+	4371	22	transportin-3			83.8	11.8	2	0.5	4.1	38.6	26.1	27.9	4	1.3	10.7	8.7	8.8	14.3	11.6	12.6	10.1	2.6	0.7	0.6	0.6	0.4	0.6	0.2	0.1
AgE01	374765	393835	AgE01_g027_t07	+	3261	18	hypothetical protein	PgB32_g012_t07	MSTRG.21867.1	24.7	9.8	2	0.1	5.2	18.4	13.3	15.1	9.7	9.8	42.8	39.9	52.1	46	31.3	40.5	26.7	5.1	1.4	1.5	1.7	0	1.7	0.5	0
AgE01	395664	407014	AgE01_g028_t01	+	1471	11	hypothetical protein	PgB32_g011_t03	MSTRG.22955.3,MSTRG.21056.1,MSTRG.22956.1	40	145.2	28	0.8	4.6	0.2	0.1	0	0.2	0.2	0	0.2	0.2	0.3	0.3	0.3	0	0.1	0	0	0.1	0	0.4	0	0.1
AgE01	419819	424214	AgE01_g029_t01	.	4396	1	Retrotransposable element Tf2 155 kDa protein type 1		MSTRG.22574.6,MSTRG.18626.6,MSTRG.18626.6,MSTRG.24236.1,MSTRG.24235.1	5.1	4.3	0.7	0	0.5	0.5	0.4	0.2	0.1	0.1	0.4	0.5	1.1	0.7	1	1.1	1.7	0.5	0.3	0.2	0.2	0.4	0.1	0	0.2
AgE01	424289	442368	AgE01_g030_t03	-	2406	13	hypothetical protein	PgE011_g006_t02,PgE357_g001_t02	MSTRG.23357.1	16.8	15.3	1.1	0.4	5.9	12	6.6	6.9	3.5	2	5.3	6.2	8.2	5.3	11.9	20.6	23.4	3.9	0.8	0.9	0.8	0	0.5	0.2	0
AgE01	445684	446100	AgE01_g031_t01	.	417	1	hypothetical protein			1.3	1.7	0.1	0	0	0	0.7	0.3	0	0	0	1.1	1.8	0.5	0.1	0.1	0	0	0	0	0	0	0	0	0
AgE01	455069	459139	AgE01_g032_t01	-	1787	3	hypothetical protein			0.9	0.5	0.1	0	0	0.1	0.1	0	0	0	0.1	0.1	0.4	0.3	0.6	0.4	0.4	0.1	0	0	0	0	0	0	0
AgE01	459990	485563	AgE01_g033_t01	-	3866	23	tudor domain containing protein	PgE002_g001_t01,PgE002_g001_t01,PgE001_g007_t01,PgE001_g007_t01,PgE001_g007_t01,PgE384_g001_t01,PgE384_g001_t01,PgE641_g001_t01	MSTRG.19347.2,MSTRG.19347.2,MSTRG.21309.12,MSTRG.7997.22,MSTRG.7997.22,MSTRG.7998.1	71.4	36.4	4.4	0.4	12	79.4	39.4	39.9	6.8	3.4	14.4	14.1	17.7	17.3	44.9	72.9	60.6	8.4	3.6	2.8	1.8	0.4	0.8	0.3	0
AgE01	488686	489269	AgE01_g034_t01	.	584	1	hypothetical protein			1.1	0.8	0.1	0	0	0	0	0	0	0	0	0	0	0	0	0	0	0	0	0	0	0	0	0	0
AgE01	506349	519789	AgE01_g035_t04	-	4345	9	Serine/threonine-protein phosphatase PP1 isozyme 2	PgE043_g004_t02,PgE056_g002_t02,PgE094_g001_t03,PgE215_g001_t01,PgE088_g001_t01,PgE014_g005_t01,PgE008_g005_t01,PgE204_g001_t01	MSTRG.21515.4,MSTRG.21515.4,MSTRG.23250.2,MSTRG.22900.4,MSTRG.22337.1,MSTRG.21870.4,MSTRG.21870.4,MSTRG.7423.3,MSTRG.23946.1,MSTRG.13356.2,MSTRG.18840.1,MSTRG.18840.1	12.5	57.9	18.5	0.2	2.4	0.3	0.2	0.3	0.1	0.1	1.8	2	1.4	1.5	3.3	2	0.5	0.1	0.1	0	0	0	0.3	0.1	0
AgE01	519910	524310	AgE01_g036_t01	-	769	3	hypothetical protein			0.6	1.3	0.2	0	0.1	0.5	0.2	0.2	0.4	0.2	3.2	2.7	0.8	2	5.5	2.4	0.9	0.1	0.2	0	0.2	0	0.2	0	0
AgE01	537719	541897	AgE01_g037_t02	+	1862	7	hypothetical protein	PgE213_g001_t01,PgE102_g001_t01		1.8	13.3	1.2	0	0.5	0	0	0	0	0	0.2	0	0.2	0.3	0.1	0.1	0	0	0	0	0	0	0	0	0
AgE01	553460	561305	AgE01_g038_t06	-	2250	6	btb poz domain containing protein	PgE102_g002_t06	MSTRG.18618.5,MSTRG.23607.1	6.5	29.1	2.6	0	0.7	0	0.1	0	0	0	0	0.3	0	0.1	0	0	0	0	0	0	0	0	0	0	0
AgE01	568635	575154	AgE01_g039_t01	-	1126	5	hypothetical protein	PgE038_g003_t05		38.9	63.9	14.4	0.4	2.9	0	0	0	0.3	0	0.1	0.3	0	0.2	0.2	0.2	0	0	0	0	0	0	0.2	0	0.1
AgE01	578105	601073	AgE01_g040_t03	+	1752	15	eukaryotic translation initiation factor 3 subunit i	PgE038_g004_t01,PgE038_g004_t01,PgE378_g001_t01	MSTRG.18407.4	24.5	3.8	1.9	0.1	4.3	44.9	26.7	27.5	10.6	5.4	27.9	25.5	37.7	28.8	13.4	17.5	16.7	2.4	0.9	0.8	0.7	0	0.7	0.5	0
AgE01	604021	616603	AgE01_g041_t02	+	3626	2	hypothetical protein		MSTRG.18755.1,MSTRG.22449.1	41.5	31.6	7.3	0.3	2.2	0	0	0	0.1	0.3	0.4	0.6	0.6	1.1	1.4	1	0.3	0.1	0	0	0.1	0	0.2	0	0.2
AgE01	617346	627317	AgE01_g042_t01	+	1505	6	hypothetical protein	PgE104_g001_t02,PgE106_g002_t02,PgE023_g004_t05	MSTRG.24117.1,MSTRG.24117.1,MSTRG.2298.1	19	45.4	6.6	0.1	1.8	0.1	0	0	0	0.1	0.2	0.4	0.5	0.5	0.2	0.1	0.2	0	0	0	0.1	0	0.1	0	0.1
AgE01	631971	635269	AgE01_g043_t01	-	1925	3	ras-related c3 botulinum toxin substrate 1		MSTRG.21616.1,MSTRG.23892.1,MSTRG.22016.3,MSTRG.21636.1,MSTRG.23234.1	2.2	4.3	0.2	0	0.1	0.1	0.3	0.1	0.1	0	0.5	0.4	0.4	0.7	1.5	0.8	0.2	0	0	0	0	0	0	0	0
AgE01	638215	639219	AgE01_g044_t01	-	590	2	RNA cytidine acetyltransferase			9	1.1	4.2	2.3	17.1	13.7	7.8	6.6	1.9	0.9	1.7	1.3	1.5	4.5	11.7	32.1	20.3	27.2	22.3	18.8	12.9	17.6	7.2	9.1	5.8
AgE01	645993	647898	AgE01_g045_t01	-	874	3	hypothetical protein			1.8	2.2	0.3	0	0	0.2	0	0	0	0	0.8	0.6	1	0.3	1	0.3	0	0	0	0	0	0	0	0	0
AgE01	651518	651769	AgE01_g046_t01	-	252	1	hypothetical protein			0.1	1.5	0	0	0	0.1	0	0	0	0	0	0	0	0	0	0	0	0	0	0	0	0	0	0	0
AgE01	653301	661058	AgE01_g047_t02	+	1705	4	hypothetical protein			24.7	32.2	2.8	0.1	1.2	0.1	0	0.1	0	0.1	0.4	0.1	0.1	0.3	1.2	0.9	0.4	0	0	0	0	0	0.1	0	0.1
AgE01	663189	681029	AgE01_g048_t02	-	3287	6	complement component c6	PgE105_g002_t03	MSTRG.20806.1,MSTRG.17384.1,MSTRG.23197.1,MSTRG.22389.7,MSTRG.20805.1,MSTRG.22396.1,MSTRG.22393.4,MSTRG.22394.1	12.9	17.8	1.9	0	0.2	0	0	0	0.1	0	0.9	1	1.2	1.5	6.9	4.5	2.2	0.1	0	0	0.2	0	0.1	0	0
AgE01	681952	682707	AgE01_g049_t01	.	756	1	hypothetical protein			0.4	13.6	1.2	0	0	0	0	0	0	0	0.2	0.5	0.2	0.2	1.3	0.5	0.5	0	0	0	0	0	0	0	0
AgE01	687350	693375	AgE01_g050_t10	-	1647	5	Ancylostoma secreted protein	PgE005_g001_t04	MSTRG.4173.6,MSTRG.22164.10,MSTRG.23784.1,MSTRG.24004.1,MSTRG.23482.17,MSTRG.5763.1	6.1	60.9	12.5	0.4	3	0	0	0	0	0	0.3	0.9	1	0.4	0.3	0.3	0.3	0	0	0	0	0	0.1	0	0
AgE01	697144	716387	AgE01_g051_t02	+	4194	8	pepsin inhibitor dit33	PgE005_g002_t02	MSTRG.23309.2	16	34.9	3.6	0.1	1.9	0.6	0.7	0.9	2.5	4.2	29.7	21.8	16.6	6.6	8	3.5	5	0.8	0.2	0.1	0	0	0.5	0.1	0.1
AgE01	719666	728585	AgE01_g052_t02	-	8920	1	gag-pol polyprotein			2.3	1.9	0.4	0	0.1	0.3	0.2	0.3	0.1	0.1	0.4	0.6	0.4	0.4	0.5	0.3	0.2	0.4	0.3	0.5	0.5	0.2	0	0	0.1
AgE01	732103	746918	AgE01_g053_t05	-	3454	10	Telomerase-binding protein EST1A	PgE190_g003_t01,PgE190_g003_t01,PgE190_g003_t01,PgE190_g003_t01,PgE190_g003_t01,PgE005_g003_t02,PgE005_g003_t02,PgE005_g003_t02,PgE005_g003_t02,PgE005_g003_t02,PgE005_g003_t02		21.3	47.4	6.8	0.3	1	0.5	0.6	0.5	0.1	0.4	2	2.1	1.4	1.2	1.7	1.2	1.1	0.1	0	0	0.1	0	0.3	0	0
AgE01	749279	764751	AgE01_g054_t02	-	1668	4	rnase h family protein		MSTRG.11668.1,MSTRG.11669.1	45.4	116.5	39.7	1	6.1	0.3	0.2	0.1	0.1	0.1	0.8	0.4	0.5	0.9	2	0.9	0.9	0.1	0	0.1	0.1	0	0.3	0	0.3
AgE01	765504	766252	AgE01_g055_t01	.	749	1	hypothetical protein			1	0.9	0.1	0.1	0.1	0	0	0.3	0	0.2	0.6	1.1	15	1.1	1.1	0.8	7	0.4	1.1	1.1	1.2	2.3	0.2	0.2	0.3
AgE01	776285	785651	AgE01_g056_t01	+	2165	10	HORMA domain-containing protein 1	PgE005_g007_t04	MSTRG.21609.1	18.3	2.5	0.2	0	7.1	18.7	8.6	7.2	3.1	1.4	20.5	19.9	20.2	25.5	26.9	24.5	14.1	2.6	0.7	0.7	0.6	1.6	1.1	0.5	0
AgE01	785832	793416	AgE01_g057_t03	-	3630	5	hypothetical protein	PgE038_g001_t02,PgE102_g003_t01		7.3	9.6	1.1	0.1	0.5	0.1	0	0	0	0.1	1.4	1.2	0.7	1.4	1.8	1.1	0.3	0	0.1	0	0	0	0.1	0	0
AgE01	794247	820299	AgE01_g058_t04	+	3154	12	Solute carrier family 22 member 6	PgE095_g003_t02,PgE108_g001_t01,PgE108_g002_t01	MSTRG.22844.2,MSTRG.22844.2,MSTRG.21597.2,MSTRG.21688.3	35.2	91.7	7.2	0.1	1.3	0.1	0.1	0	0.1	0.1	0.5	1.1	0.5	1.1	0.6	0.3	0.4	0	0	0	0	0	0.2	0	0
AgE01	831261	832007	AgE01_g059_t01	.	747	1	hypothetical protein			0.5	0.7	0.2	0	0	0.1	0	0	0	0	2.8	1.7	1.2	0.9	0.6	0	0	0.1	0	0	0.6	0	0	0	0
AgE01	832444	834252	AgE01_g060_t01	.	1809	1	hypothetical protein			0.2	0.1	0	0	0.1	0.1	0	0	0	0	3.9	3.8	1	0.6	0.1	0	0.1	0	0	0	0.2	0	0	0	0
AgE01	837463	837765	AgE01_g061_t01	.	303	1	hypothetical protein			0.1	0.2	0	0	0.2	0	0	0.1	0	0	6.4	4.7	2.6	0.5	0.3	0	0	0	0	0	0	0	0	0	0
AgE01	838434	840388	AgE01_g062_t01	.	1955	1	hypothetical protein			0.1	0.1	0	0	0.1	0	0	0	0	0	3.4	3.5	0.7	0.4	0.1	0	0	0	0	0	0.2	0	0	0	0
AgE01	845090	845737	AgE01_g063_t01	.	648	1	hypothetical protein			0.2	0.3	0.1	0	0.2	0	0	0	0	0	0.7	0.5	0.3	0.4	0	0.1	0.2	0	0	0	0.3	0	0	0	0
AgE01	860561	864256	AgE01_g064_t01	+	624	3	hypothetical protein			0	0	0	0	0	0	0	0	0	0	0	0	0	0	0	0	0	0	0	0	0	0	0	0	0
AgE02	19049	19483	AgE02_g001_t01	.	435	1	hypothetical protein			2.1	0.2	0	0.1	1.5	23.6	21.4	17.4	1.3	0.4	1.3	3.4	1.7	0.9	1.3	1.3	0.9	0.2	0	0.2	0.2	0	0.1	0	0
AgE02	19772	38486	AgE02_g002_t03	+	5893	15	Tyrosine-protein phosphatase non-receptor type 9	PgE029_g001_t02,PgE229_g002_t04,PgE293_g001_t01	MSTRG.21864.2,MSTRG.1831.1,MSTRG.21654.2,MSTRG.20010.1,MSTRG.18835.3,MSTRG.22740.5,MSTRG.22327.1,MSTRG.21920.4,MSTRG.20793.1,MSTRG.23026.4,MSTRG.23873.1,MSTRG.23028.1,MSTRG.22741.1	9.2	1	0.7	0.2	3.9	69.5	67.7	70.1	6.3	7.1	12.5	11.7	10.4	12.2	8.4	7.9	5.6	0.8	0.4	0.4	0.7	0.3	1.3	0.8	0
AgE02	38580	43149	AgE02_g003_t02	-	1655	4	SUMO-conjugating enzyme UBC9			13.5	3.5	0.5	0.1	3.1	12.6	8.8	9	1.9	3.4	18.7	16	11.8	22.3	31.4	37.4	23.5	4.8	0.4	1	0.6	0	1.4	0.7	0.1
AgE02	38769	42732	AgE02_g004_t01	+	3408	2	SUMO-conjugating enzyme UBC9			5.6	1.4	0.2	0	1.7	4.1	2.8	2.9	0.7	1	5.2	4.1	2.8	6.4	18.7	18.3	12.9	4.8	0.8	0.9	0.8	0.5	0.7	0.2	0
AgE02	46296	52698	AgE02_g005_t06	-	1340	8	msp domain containing protein	PgE029_g002_t01,PgE404_g001_t01,PgE120_g002_t03	MSTRG.23491.3,MSTRG.21144.1,MSTRG.10800.2,MSTRG.23685.5,MSTRG.22367.1,MSTRG.7434.2,MSTRG.22310.1,MSTRG.22311.1,MSTRG.21741.1,MSTRG.23686.3,MSTRG.23492.1	51.2	133.5	10.5	0.5	4	0.4	0.2	0	0.1	0.2	0.6	0.2	0.7	0.4	1.1	1.6	0.2	0	0	0	0.1	0	0.3	0	0.1
AgE02	53935	64763	AgE02_g006_t11	-	1608	11	Ribonuclease ZC3H12A		MSTRG.1695.4	76.7	202.8	17.4	0.8	8.4	0.3	0.2	0.2	0.4	0.2	0.4	0.4	0.3	0.5	9.6	19	8.2	0.7	0.2	0.3	0.4	1.1	1	0	0.2
AgE02	66436	77081	AgE02_g007_t02	+	4898	7	tata box-binding protein 1	PgE029_g004_t03		29.5	28.4	10.7	0.2	4.8	20.6	20.3	19	5	4.6	32.5	28.6	29.1	29.7	15.2	13	6.8	1.5	0.3	0.5	0.9	0	1.4	1	0.1
AgE02	75261	81899	AgE02_g008_t05	-	1159	6	Ubiquitin-conjugating enzyme E2 7, partial	PgE109_g003_t01,PgE109_g002_t01,PgE111_g001_t01,PgE030_g001_t02	MSTRG.18751.1,MSTRG.1696.1,MSTRG.7436.1,MSTRG.8297.2,MSTRG.17394.1,MSTRG.22898.1,MSTRG.21589.1,MSTRG.13376.1,MSTRG.22259.5,MSTRG.1697.1,MSTRG.21511.1	50.1	134.7	56.9	1.1	7.7	12.6	27.7	26.8	3.7	4	23.8	15	12.1	16.6	16	16.8	14.8	2.3	0.8	0.5	0.3	0	1.1	0.3	0.3
AgE02	80292	90061	AgE02_g009_t05	+	1619	4	hypothetical protein	PgE153_g003_t01	MSTRG.21820.1,MSTRG.20173.1,MSTRG.20173.1	15.2	18	2.1	0.1	0.9	4.8	9.2	10	1.6	0.6	1.4	1.2	1.5	1.9	3.6	3.3	4.4	0.5	0.2	0.1	0.2	0	0.2	0.2	0
AgE02	93150	122595	AgE02_g010_t02	+	4050	19	hypothetical protein	PgE103_g005_t02,PgE172_g002_t03,PgE242_g001_t05,PgE341_g001_t01	MSTRG.20001.2,MSTRG.21252.1,MSTRG.18546.2	20.7	31.7	3.6	0.2	2.6	3.4	2	1.8	0	0	0.5	0.2	0.4	0.7	1.4	1.9	1	0.7	0.2	0.3	0.5	0	0.2	0.1	0.1
AgE02	131925	136440	AgE02_g011_t08	-	1667	4	u1 small nuclear ribonucleoprotein c	PgE103_g003_t01		13.2	9.5	1	0.2	0.4	1.3	0.5	0.6	0.3	0.6	2.4	4.4	2.9	2.6	3.1	1.6	0.3	0	0.1	0	0.1	0	0.2	0	0.1
AgE02	138120	141659	AgE02_g012_t03	+	1447	3	hypothetical protein	PgE103_g001_t02	MSTRG.18243.1	92.3	8	5.7	2.2	30.9	255.1	654	576.7	83.3	85.5	477.7	504.3	975.3	443.7	295	251.9	246	13	2.4	4.4	6.2	2.4	17.2	6.3	0.6
AgE02	157910	201418	AgE02_g013_t06	+	4215	20	hypothetical protein	PgE130_g001_t02,PgE086_g001_t05	MSTRG.19787.1	45.9	10.9	2.1	0.2	5.1	105.6	61.8	67.8	5.4	4.5	12.5	15.9	16.4	15.6	21.4	29.4	24.7	3.5	0.9	0.9	0.8	0.4	1.5	1.2	0
AgE02	143993	157623	AgE02_g014_t04	-	2538	13	hypothetical protein	PgE086_g002_t03		36.3	215.7	25.6	0.5	7.3	1.9	2.4	2.3	0.5	0.4	3.7	3.5	4.4	7.1	7.4	8.1	5.4	1	0.5	0.4	0.7	0	0.8	0.1	0.1
AgE02	187115	204096	AgE02_g015_t02	-	16676	2	Major sperm protein isoform beta	PgE404_g001_t01,PgE029_g002_t01	MSTRG.10800.2,MSTRG.7434.2,MSTRG.22310.1,MSTRG.22311.1,MSTRG.22311.1,MSTRG.23685.5,MSTRG.23685.5,MSTRG.19788.1,MSTRG.19788.1,MSTRG.22367.1,MSTRG.23686.3,MSTRG.23686.3,MSTRG.23311.1,MSTRG.20011.3,MSTRG.20011.3,MSTRG.19787.1,MSTRG.22368.1,MSTRG.23368.2,MSTRG.23491.3,MSTRG.24298.2,MSTRG.24361.2	309.8	543.3	390.2	4.6	40.3	9.1	6.4	6.4	1.3	1.2	1.3	1.6	2	1.9	4.4	6.6	4.5	1.1	0.3	0.2	0.6	0.1	2	0.4	6.1
AgE02	206233	440888	AgE02_g016_t01	-	336	2	Major sperm protein isoform beta	PgE404_g001_t01	MSTRG.23685.5,MSTRG.23685.5,MSTRG.10800.2,MSTRG.23686.3,MSTRG.22311.1,MSTRG.19788.1,MSTRG.22310.1,MSTRG.7434.2,MSTRG.22367.1,MSTRG.24361.2,MSTRG.24362.1	402.4	738.1	415.8	6.4	30.3	0.7	0.7	0.5	0	2.2	2.1	3.9	2.2	1.8	3.8	1.8	5.8	0.8	0.3	0.5	12.7	0	9.2	1.8	50.4
AgE02	206233	441716	AgE02_g017_t01	+	871	3	Major sperm protein isoform beta	PgE404_g001_t01,PgE029_g002_t01	MSTRG.10800.2,MSTRG.7434.2,MSTRG.22310.1,MSTRG.22311.1,MSTRG.22311.1,MSTRG.23685.5,MSTRG.23685.5,MSTRG.19788.1,MSTRG.19788.1,MSTRG.22367.1,MSTRG.23686.3,MSTRG.23686.3,MSTRG.23311.1,MSTRG.20011.3,MSTRG.20011.3,MSTRG.19787.1,MSTRG.22368.1,MSTRG.23368.2,MSTRG.23491.3,MSTRG.24298.2	3984.7	8508.3	5985.6	93.1	702.4	9.4	7.7	2.9	11	13.9	4	8.7	9.7	8	9.5	7.4	9.1	1.5	0.6	0.4	5.7	0	20.7	2.3	77.7
AgE02	207685	214684	AgE02_g018_t01	+	7000	1	putative splicing arginine serine-rich 7			10.1	14.2	1.2	0	1.1	0.7	0.5	0.3	0	0	0.3	0.3	0.4	0.4	1.4	1.3	1	0.1	0	0.1	0.2	0	0	0	0
AgE02	237343	272345	AgE02_g019_t02	+	3099	18	hypothetical protein		MSTRG.21020.1,MSTRG.22594.1,MSTRG.22340.1,MSTRG.18411.2,MSTRG.23157.1,MSTRG.18616.4,MSTRG.18616.4,MSTRG.19784.1	40.9	146.7	12.4	0.3	6.1	7.6	3.5	3.2	1.1	0.7	4.4	4.7	6.6	11	12	15.8	9.3	1.9	0.5	0.3	0.5	0	0.4	0.1	0
AgE02	289885	293358	AgE02_g020_t01	.	3474	1	hypothetical protein			7.5	9.1	0.9	0	0.1	0.5	0.2	0.5	0.1	0.1	0.9	2.3	6.7	0.9	4.1	3.6	5.6	0.4	0.3	0.3	0.2	0.5	0.3	0.1	0.2
AgE02	295063	295560	AgE02_g021_t01	.	498	1	hypothetical protein			1	3.6	0	0	0	0.2	0.1	0	0	0	0.5	0.4	0.2	0.2	0	1	0	0	0	0	0	0	0	0	0
AgE02	296186	311234	AgE02_g022_t01	-	7482	7	protein lsm14-like protein b	PgE009_g001_t04,PgE308_g001_t01	MSTRG.21298.12,MSTRG.8300.1,MSTRG.20044.1,MSTRG.21823.2,MSTRG.23154.1	20.9	12.9	1.6	0.1	2.5	24.1	31.2	27.4	4.8	4.8	22.4	19.2	21.9	22.6	14.1	11.8	5.9	0.6	0.2	0.3	0.2	0	1	0.4	0
AgE02	312702	313125	AgE02_g023_t01	.	424	1	hypothetical protein			0.9	0.1	0	0	0	0	0	0	0	0	0.3	1	0.2	0.8	0.2	0.4	0	0.2	0	0	0.2	0	0	0	0
AgE02	313700	330180	AgE02_g024_t02	+	3178	6	hypothetical protein	PgE009_g002_t08	MSTRG.22774.1,MSTRG.22774.1	15.8	1.8	0.6	0.1	1.3	47.4	42.4	37	7.8	6.9	30.5	33.3	44.7	43.4	19.8	11.9	11.4	0.8	0.2	0.3	0.3	0	1.1	0.5	0
AgE02	327801	330180	AgE02_g025_t01	-	2196	2	hypothetical protein			6.7	0.8	0.3	0	0.6	14.5	14.4	13	3.6	14.8	59.1	58.1	73.2	45.2	29.7	20.2	8	0.5	0.2	0.3	0.3	0	1.2	0.5	0
AgE02	342732	355385	AgE02_g026_t03	+	796	7	hypothetical protein			2	28	1.4	0	0.1	0.4	0.6	0.4	0.8	0.7	0.7	0.9	0.2	1.8	1.7	2	1.9	0.4	0.1	0.1	0.2	0	0	0	0
AgE02	358552	378498	AgE02_g027_t05	+	2434	18	Tyrosine-protein kinase Fps85D	PgB25_g019_t01,PgE056_g003_t06,PgE088_g002_t01,PgB37_g005_t03,PgE277_g001_t02,PgE063_g004_t02,PgE002_g006_t01,PgE001_g002_t01,PgE080_g003_t01,PgE035_g002_t08	MSTRG.23443.1,MSTRG.19994.2,MSTRG.19994.2,MSTRG.17933.1,MSTRG.23400.4,MSTRG.7427.1,MSTRG.23125.4,MSTRG.23796.1,MSTRG.21580.2,MSTRG.18317.15,MSTRG.21090.8,MSTRG.21090.8,MSTRG.23481.2,MSTRG.19573.8,MSTRG.22241.1,MSTRG.22069.3,MSTRG.16581.1,MSTRG.16870.5,MSTRG.23332.3,MSTRG.21941.1,MSTRG.8296.2,MSTRG.22543.7,MSTRG.11670.1	37.1	153.3	48.7	1	6.8	71.4	147.7	144.5	57.8	36.2	284.1	258.9	296.3	307.6	87	83.3	32.9	2	0.4	1.1	1.7	0	5.7	2	0.1
AgE02	379010	387782	AgE02_g028_t03	-	2582	7	Paxillin			522.9	1061.7	140.1	6.3	49.3	0.7	0.8	0.3	0.9	1.9	1.2	1.3	1.2	0.9	2.4	2	1.7	0.4	0.2	0	0.5	0	3.9	0.3	4.7
AgE02	389627	399604	AgE02_g029_t02	-	4335	9	myosin-7	PgE294_g002_t01	MSTRG.21021.3	12.4	3.7	0.8	0	0.6	8.5	6.9	6.2	2.3	4.7	23.7	27.5	58	31.6	39.1	57.6	62.6	5.3	1.3	1.2	1.4	1.6	1.1	0.6	0.1
AgE02	400798	401139	AgE02_g030_t01	.	342	1	Nuclear pore complex protein DDB_G0274915			0.3	0	0	0	0.5	0	0	0	0	0	4.4	5.5	7.7	2.9	9.2	6.4	4.5	3.6	0.2	1.1	1.1	0	0	0	0
AgE02	401670	402166	AgE02_g031_t01	.	497	1	Epsin-1			0.4	0.1	0	0	0.4	0	0	0	0	0.1	2	4.4	4.1	2.8	5.9	5.8	3.2	2.9	1	0.5	0.6	0	0	0	0
AgE02	407428	416267	AgE02_g032_t01	-	3169	8	myosin-7	PgE470_g001_t01,PgE294_g001_t01,PgE308_g002_t01	MSTRG.21021.3,MSTRG.21867.1	8.5	3.6	0.7	0	0.7	7.2	4.3	4.2	1.5	2.1	9.5	12.1	14.7	16.8	34.2	41.8	27.8	3.5	0.7	1	0.8	0	0.3	0.2	0.1
AgE02	430951	431650	AgE02_g033_t08	+	700	1	Abhydrolase domain-containing protein	PgE355_g001_t02	MSTRG.22556.1	4	14.6	2	0	1.1	0.5	0.8	0.9	0	0.1	2.4	1.4	0.9	2.5	2.4	2.3	0.1	0.5	0.2	0.1	0.2	0	0.5	0.2	0
AgE02	455530	508540	AgE02_g034_t08	-	7308	38	Myoferlin	PgE089_g002_t08,PgE432_g001_t01,PgE032_g002_t18	MSTRG.21099.1,MSTRG.21099.1,MSTRG.21099.1,MSTRG.20439.1,MSTRG.21100.1,MSTRG.20438.1	43.2	39.9	4.1	0.2	5	39.5	21.9	23.7	3.9	1.7	11.1	13.3	17.7	21.9	36	43.9	37	7.3	2.7	2.9	3.2	0.5	0.6	0.5	0
AgE02	423737	424157	AgE02_g035_t01	.	421	1	hypothetical protein			1.7	5.1	0.1	0	0	0.3	0.1	0.5	0	0	0.6	0.4	0	0.4	1.9	1.2	0.3	0	0.1	0	0	0	0	0	0
AgE02	431736	432264	AgE02_g036_t01	.	529	1	hypothetical protein			1.5	3.3	0.3	0	0	0.2	1.5	1.3	0.8	0.3	5.5	4.2	2.7	8.6	3.9	4	1.5	0.1	0.2	0.1	0.2	0	0.2	0	0
AgE02	437526	438878	AgE02_g037_t01	-	476	3	Major sperm protein isoform beta	PgE404_g001_t01,PgE029_g002_t01	MSTRG.10800.2,MSTRG.7434.2,MSTRG.22310.1,MSTRG.22311.1,MSTRG.22311.1,MSTRG.23685.5,MSTRG.23685.5,MSTRG.19788.1,MSTRG.19788.1,MSTRG.22367.1,MSTRG.23686.3,MSTRG.23686.3,MSTRG.23311.1,MSTRG.20011.3,MSTRG.20011.3,MSTRG.19787.1,MSTRG.22368.1,MSTRG.23368.2,MSTRG.23491.3,MSTRG.24298.2,MSTRG.24361.2	6314.3	14397.9	10842.6	158.4	1268	14.4	14.8	5.5	20.4	30.6	9.7	15	22.4	12.6	16	13	14	2.8	1.2	1.3	7.7	0	64.2	6.3	225
AgE02	447645	465914	AgE02_g038_t02	+	15100	5	Sperm vesicle fusion protein fer-1	PgE022_g007_t01		13.4	12.9	1.3	0.1	0.7	5	4.4	4.5	0.2	0.1	1.2	1.1	1.1	1.6	8.6	11.2	8.9	2	0.7	0.7	0.9	0.3	0.1	0.1	0
AgE02	514669	522604	AgE02_g039_t02	+	1336	8	hypothetical protein	PgE106_g002_t02,PgE104_g001_t02,PgE023_g004_t05	MSTRG.24117.1,MSTRG.24117.1,MSTRG.2298.1	53.9	150	15.4	0.3	4.3	0.4	0.6	0.6	0.5	0.1	0.2	0.5	0	0.3	0.2	0.2	0.1	0	0	0	0.2	0	0.4	0	0.3
AgE02	525848	554288	AgE02_g040_t02	-	28127	2	hypothetical protein	PgE084_g001_t04		10	28.4	2.5	0.1	0.8	0.6	0.4	0.4	0.2	0.1	0.7	0.6	0.6	0.7	1.4	1.4	1.1	0.2	0.1	0.1	0.1	0	0.1	0	0
AgE02	526707	537510	AgE02_g041_t03	+	2299	9	hypothetical protein		MSTRG.20007.1	7	16.7	1.2	0	0.2	0.2	0.3	0.2	0.1	0	0.1	0	0.1	0	0.2	0	0	0	0	0	0	0	0.1	0	0
AgE02	556082	567167	AgE02_g042_t01	-	3242	6	E3 ubiquitin-protein ligase MARCH8		MSTRG.17770.3,MSTRG.17770.3,MSTRG.17769.3	18.9	80.2	7.4	0.2	3.2	0.9	0.5	0.4	0.2	0.2	1.2	1.3	2.4	2	2.7	2.7	1.5	0.4	0.2	0.1	0.2	0	0.3	0	0.1
AgE03	15744	45934	AgE03_g001_t23	-	2076	12	E3 ubiquitin-protein ligase HUWE1		MSTRG.14754.8,MSTRG.14754.8,MSTRG.22908.9,MSTRG.14755.2,MSTRG.22909.2	295.3	220.3	28.5	2.9	38.7	683.9	210.3	224	18.8	3.2	7.4	12.6	15.5	18	55.9	46.9	55.2	16.8	10.5	9.2	6.6	6.7	2.5	1.6	1.8
AgE03	10399	24152	AgE03_g002_t01	+	200	2	E3 ubiquitin-protein ligase HUWE1		MSTRG.14754.8	124.6	120.7	15	1.4	16.6	283.7	81.4	84.5	8.8	0.6	3.8	2.6	4.2	8.5	29.3	17.7	16.6	17	10.6	11.8	7	8.6	0.3	0.9	0.6
AgE03	11092	13829	AgE03_g003_t01	.	2738	1	Syntaxin-binding protein 5		MSTRG.14754.8	26.5	36.8	4.2	0.3	3.3	79.7	20.2	25.6	2.4	0.3	0.8	1.5	1.2	3.4	11.4	8.4	9.6	5.9	4.3	3.4	2.3	1.3	0.5	0.2	0.3
AgE03	60214	62528	AgE03_g004_t01	+	920	2	E3 ubiquitin-protein ligase HUWE1, partial			89.2	58.4	8.7	0.8	10.3	195.2	68.1	68	3.7	1.2	2	2.9	5.2	3.7	13.4	11.3	13.2	3.9	2.1	2.2	1.7	5.6	0.6	0.4	0.4
AgE03	65446	67160	AgE03_g005_t01	-	270	2	Syntaxin-binding protein 5			35.3	47.1	11.7	9.8	4.2	94.7	26.3	31.6	5.7	1.1	1.3	3.5	2.7	4.2	9.7	10.9	7.7	5.3	4.6	6.4	6.4	0	1.1	1.8	1.4
AgE03	67283	68300	AgE03_g006_t01	-	517	3	zinc c2h2 type family protein	PgE044_g003_t01,PgB28_g015_t01,PgE157_g001_t01,PgE272_g001_t01		1.4	0.2	0	0	0	1.6	0.3	0.4	0	0	0	0	0	0	0	0	0.1	0	0	0	0	0	0	0	0
AgE03	68697	70859	AgE03_g007_t01	-	937	4	zinc c2h2 type family protein	PgB28_g015_t01,PgE157_g001_t01,PgE044_g003_t01		1.1	0.5	0	0	0	2	0.4	0.3	0	0	0.1	0	0.1	0	0.3	0	0	0	0	0	0	0	0	0	0
AgE03	71615	78568	AgE03_g008_t02	-	4312	4	elongator complex protein 2			2.9	0.5	0.3	0	0	2.1	0.8	0.8	0	0.2	0.5	0.5	0.5	1.1	1.7	0.5	0.4	0.1	0	0	0	0	0.1	0	0
AgE03	79525	102878	AgE03_g009_t03	-	8550	11	hypothetical protein	PgE006_g005_t02	MSTRG.22509.4	15.4	47.9	4.9	0.1	1	0.1	0.1	0	0.1	0	0.4	0.4	0.3	0.5	0.8	0.6	0.5	0	0	0	0	0	0.2	0	0
AgE03	96666	102878	AgE03_g010_t03	+	3016	4	hypothetical protein			6.6	26.8	3.5	0	0.4	0	0.1	0	0	0	0.2	0.2	0	0.4	0.6	0.2	0.2	0	0.1	0	0	0	0.1	0	0
AgE03	104746	117496	AgE03_g011_t01	+	2232	6	hypothetical protein			4.3	24.9	2.5	0.1	0.5	0.2	0	0	0	0.1	0.6	0.5	1.1	0.8	0.8	0.3	0.1	0	0	0	0	0	0.1	0	0
AgE03	117625	124070	AgE03_g012_t04	-	1484	5	Methylmalonyl-CoA epimerase	PgE067_g001_t05	MSTRG.10156.1	174.5	405.9	54	2.5	21.4	0.1	0.1	0.1	0.7	0.1	0.5	0.2	1	0.4	1.3	1.3	1	0.1	0	0	0.3	0	1.8	0.1	2.2
AgE03	123664	130660	AgE03_g013_t01	+	2003	10	hypothetical protein	PgE067_g002_t01	MSTRG.7432.3	111.6	179.1	19.4	0.9	6.1	1	0.7	0.3	0.3	0.2	1.3	1.5	0.7	1.9	1.7	1	0	0	0	0	0.1	0	0.5	0	0
AgE03	141506	141879	AgE03_g014_t01	.	374	1	hypothetical protein			1.5	1.5	0	0	0	0	0.2	0.1	0	0	0	0	0	0	0.1	0.2	0	0	0	0	0	0	0	0	0
AgE03	142278	147214	AgE03_g015_t02	+	1149	5	hypothetical protein			46.2	61.6	6.3	0.1	2.5	0	0.1	0	0.2	0	0.2	0	0	0	0.2	0.1	0	0	0	0	0.1	0	0.1	0	0
AgE03	154602	157662	AgE03_g016_t01	+	1059	2	hypothetical protein			42.4	35.6	4.6	0.3	1.1	0	0	0	0	0	0.4	0.4	0.7	0.6	2.4	1.1	0.6	0.1	0	0	0	0	0.1	0	0.2
AgE03	161159	163911	AgE03_g017_t02	+	615	6	Homologous-pairing protein 2			11	2.3	0.9	0	1	30.8	32.3	25.4	9	36.9	190.8	193.5	127.6	159.5	127	135.4	36.9	3.4	0.4	0.7	0.8	0	3.9	1.6	0.2
AgE03	164693	170229	AgE03_g018_t01	-	2655	5	structural maintenance of chromosomes protein 3	PgE027_g003_t01,PgE235_g001_t03	MSTRG.21620.1,MSTRG.21620.1,MSTRG.21621.1	4.1	1.5	0.3	0	0.5	3.2	3.1	3.7	1.4	0.9	5.9	3.5	2.6	4.5	4.5	4.2	2.3	0.4	0.1	0.1	0.1	0	0.5	0.2	0
AgE03	172153	177080	AgE03_g019_t01	-	1637	6	hypothetical protein	PgE098_g002_t02,PgE116_g001_t04		37.3	43.9	5.4	0.2	2.1	0.1	0	0.1	0	0.2	0.2	0.4	0.4	0.2	0.3	0.4	0.2	0.1	0	0	0.1	0	0.5	0	0.3
AgE03	179811	185038	AgE03_g020_t01	+	944	5	hypothetical protein	PgE098_g001_t18,PgE126_g001_t05	MSTRG.24378.2,MSTRG.22591.2,MSTRG.22649.1,MSTRG.22355.1,MSTRG.21560.1,MSTRG.10847.9	71.8	178	77.7	1.3	8.5	0.2	0.1	0	0.6	0.2	0.4	0.4	0.7	1.2	1	0.6	0.3	0.1	0.1	0	0.1	0	0.4	0	0.3
AgE03	185766	192403	AgE03_g021_t01	+	1346	4	rab-like protein 5			0.1	0	0	0	0.1	0.6	2.3	2	0.8	0.4	3.9	5.5	5	3.8	7.8	13.1	9	0.6	0	0.6	6.7	0	0.3	0	0
AgE03	210137	221720	AgE03_g022_t01	-	2517	11	Tyrosine-protein kinase Fer	PgE063_g004_t02,PgE056_g003_t06,PgE088_g002_t01,PgB37_g005_t03,PgE002_g006_t01,PgE001_g002_t01,PgB25_g019_t01,PgE277_g001_t02,PgE080_g003_t01,PgE222_g001_t02	MSTRG.23400.4,MSTRG.23443.1,MSTRG.19994.2,MSTRG.19994.2,MSTRG.17933.1,MSTRG.19573.8,MSTRG.19573.8,MSTRG.7427.1,MSTRG.23125.4,MSTRG.23796.1,MSTRG.21580.2,MSTRG.18317.15,MSTRG.21090.8,MSTRG.23481.2,MSTRG.22241.1,MSTRG.22069.3,MSTRG.16581.1,MSTRG.8296.2,MSTRG.21941.1,MSTRG.20759.5	43.8	95.5	22	0.4	2.8	0.7	1.4	1	0.4	0.6	2.4	4.1	4.7	2.6	8	13.3	24.1	10.8	12.4	22.6	5	3.4	1.5	0.1	1.4
AgE03	225374	244695	AgE03_g023_t02	+	3009	18	eukaryotic translation initiation factor 3 subunit c	PgE063_g002_t07,PgE063_g002_t07,PgE140_g002_t02		36	43.3	3.4	0.1	0.8	2.5	1.8	2.1	0	0	0.4	0.9	0.9	1.1	3.1	1.3	0.2	0	0	0	0	0	0.1	0	0
AgE03	241999	254139	AgE03_g024_t01	-	5949	3	Eukaryotic translation initiation factor 3 subunit C	PgE117_g001_t01		7	3.7	0.3	0	0.5	1.5	1.6	1.3	0.2	3	11.4	15.2	7.9	7.8	6.9	3.5	1.1	0.2	0	0.1	0.1	0	0.3	0.1	0
AgE03	254750	267818	AgE03_g025_t01	+	2087	10	zinc-binding dehydrogenase family protein	PgE117_g002_t03,PgE356_g001_t01	MSTRG.10147.2,MSTRG.23023.4,MSTRG.23023.4,MSTRG.20582.12,MSTRG.20582.12,MSTRG.20582.12,MSTRG.20618.2,MSTRG.23024.1,MSTRG.23022.1	152.3	454.8	135.7	2.3	18.7	3.7	0.9	0.8	0.4	0.2	3.3	4.1	3.1	3.7	18.4	16.9	4.2	0.4	0.1	0.1	0.2	0	1.9	0	0.2
AgE03	269980	280006	AgE03_g026_t04	-	1748	11	Tyrosine-protein kinase Fps85D	PgE056_g003_t06,PgB37_g005_t03,PgE088_g002_t01,PgE277_g001_t02,PgB25_g019_t01,PgE063_g004_t02,PgE002_g006_t01,PgE001_g002_t01,PgE080_g003_t01,PgE222_g001_t02,PgE021_g005_t04	MSTRG.23400.4,MSTRG.7427.1,MSTRG.23443.1,MSTRG.19994.2,MSTRG.19994.2,MSTRG.23796.1,MSTRG.17933.1,MSTRG.21580.2,MSTRG.23125.4,MSTRG.18317.15,MSTRG.19573.8,MSTRG.19573.8,MSTRG.21090.8,MSTRG.21090.8,MSTRG.23481.2,MSTRG.22069.3,MSTRG.16581.1,MSTRG.22241.1,MSTRG.21941.1,MSTRG.23265.1,MSTRG.8296.2,MSTRG.20759.5,MSTRG.11670.1,MSTRG.11670.1,MSTRG.23264.1,MSTRG.23264.1,MSTRG.20409.5,MSTRG.16870.5	59.1	151.6	51	0.6	5.1	0.3	0.3	0.3	0.6	0	0.4	0.6	0.7	0.6	0.7	0.8	0.2	0	0	0	0.1	0	0.4	0	0
AgE03	283367	292140	AgE03_g027_t02	-	2109	7	carrier protein 1	PgE081_g004_t02,PgE636_g001_t02,PgE081_g006_t01,PgE081_g005_t01,PgB22_g038_t01	MSTRG.22206.1,MSTRG.22328.1	237.3	41.1	6.4	1	39.1	124.1	81.6	82.9	24.7	16.1	97	70	45.8	97.1	39	28.6	6.2	1.3	0.3	0.7	1.4	0.8	4.4	3.5	0.2
AgE03	290689	311859	AgE03_g028_t02	+	14120	11	serine threonine-protein phosphatase pp1 isozyme 1	PgE056_g002_t02,PgE043_g004_t02,PgE088_g001_t01,PgE094_g001_t03,PgE215_g001_t01,PgE014_g005_t01,PgE008_g005_t01,PgE204_g001_t01	MSTRG.22900.4,MSTRG.22337.1,MSTRG.23250.2,MSTRG.21870.4,MSTRG.21870.4,MSTRG.7423.3,MSTRG.21515.4,MSTRG.21515.4,MSTRG.23946.1,MSTRG.18840.1,MSTRG.13356.2	8.4	14.2	3	0.1	1.6	0.5	0.5	0.5	0.4	0.2	6	10.4	10.2	18.8	15.8	19.8	6.9	1.4	0.1	0.1	0.2	0.1	0.4	0	0
AgE03	298280	310958	AgE03_g029_t01	-	10021	2	E3 ubiquitin ligase complex SCF subunit sconC		MSTRG.23290.3	3.8	4.8	0.7	0	0.3	0.1	0.1	0.1	0.2	0.1	10.9	25.9	21	30.4	25.7	28.2	13.8	1.6	0.1	0.3	0.2	0	0.4	0	0
AgE03	315021	326451	AgE03_g030_t05	+	1529	7	hypothetical protein		MSTRG.21891.1	19.5	33.2	4.1	0.2	1.5	0.3	0.2	0.2	0	0.1	2.3	3.7	2.5	5.8	7.9	5	2.7	0.4	0.1	0.1	0.3	0	0.3	0	0.1
AgE03	330348	335969	AgE03_g031_t01	+	706	5	hypothetical protein			10.8	18.9	1.4	0	0	0.1	0	0	0	0	0.1	0.6	1.2	1.1	0.5	0.2	0	0.2	0	0	0	0	0	0	0
AgE03	349211	351281	AgE03_g032_t01	+	643	3	Serpin-like protein			0.3	0.1	1.9	1.5	1	5.1	12.7	12.5	10.6	5.2	17.4	13.3	7.6	19.4	4.1	4.9	0.4	0.3	0.1	0.4	0.3	0	26.8	3.9	0.1
AgE03	362373	371617	AgE03_g033_t02	+	4417	6	hypothetical protein	PgE006_g004_t02		42.5	114.4	41.8	0.8	5.4	0.1	0.3	0.2	0.2	0.3	3.8	3.8	3	2.4	1.7	1.3	1.2	0.1	0	0	0	0	0.4	0	0.1
AgE03	374624	379976	AgE03_g034_t07	-	909	5	hypothetical protein	PgE129_g001_t03	MSTRG.20875.1	7.8	12	1.8	0.1	0	0	0	0	0.1	0	0	0.1	0	0.4	0.1	0	0	0	0	0	0	0	0	0	0
AgE03	389589	398407	AgE03_g035_t10	+	4662	5	Homeotic protein female sterile	PgE027_g005_t02	MSTRG.17953.1,MSTRG.22101.15	26.5	23	2.4	0.1	1.4	0.3	0.2	0.3	1.2	0.8	6.5	4.3	2.6	4.1	2.5	1.4	0.3	0	0	0	0.1	0	0.3	0.1	0
AgE03	388516	388823	AgE03_g036_t01	.	308	1	hypothetical protein			5.9	2.2	0	0	0	0	0	0	0	0	0	0.7	0	0	0.2	0	0	0	0	0	0	0	0	0	0
AgE03	401211	408819	AgE03_g037_t01	-	4999	3	Bromodomain-containing protein 3			3.2	1.2	0.5	0.4	0.9	2.1	1.8	1.6	0.9	2.6	14.5	35.2	56.2	42.7	34	19.9	101.5	21.6	3.4	1.8	1.3	2.1	1.7	0.9	0.9
AgE03	411501	417917	AgE03_g038_t01	-	2928	4	Bromodomain-containing protein 3	PgB34_g004_t04,PgE027_g005_t02	MSTRG.22101.15,MSTRG.17953.1	9.8	1.8	0.3	0	3.1	13.6	10.7	10.4	0.3	0.6	5.5	6	6.9	8.1	7.3	4.5	2.1	0.3	0	0.1	0	0	0.3	0.2	0
AgE03	420526	433615	AgE03_g039_t02	-	2842	8	putative serine threonine-protein kinase	PgE111_g002_t03,PgB22_g041_t04,PgB25_g018_t01,PgE078_g001_t01,PgE149_g003_t02,PgE021_g005_t04	MSTRG.17766.1,MSTRG.13368.2,MSTRG.19589.1,MSTRG.23846.1,MSTRG.17769.3,MSTRG.20782.13,MSTRG.23052.1,MSTRG.13365.1,MSTRG.22167.7,MSTRG.20353.1,MSTRG.22376.1,MSTRG.21745.1,MSTRG.16874.1,MSTRG.21747.2	36.8	116.4	45.9	0.7	5.4	0.1	0.1	0	0.1	0	1	1.1	1	1.9	3	2.3	1.3	0.1	0.1	0	0	0	0.3	0	0.1
AgE03	429107	430217	AgE03_g040_t01	.	1111	1	hypothetical protein			4	25.8	10.5	0.3	0.7	0	0.1	0	0	0	0.3	0.1	0	0.5	0.3	0.2	0	0.1	0	0	0	0	0.2	0	0
AgE03	441935	445059	AgE03_g041_t01	+	2250	3	hypothetical protein			2.2	0.1	0.1	0	0.2	4.9	2.3	2.1	0	0.6	2.2	1	0.7	1	0.4	0.1	0	0	0	0	0.1	0	0.3	0.4	0
AgE03	496238	500031	AgE03_g042_t02	-	1569	4	Prefoldin subunit 6			0.7	0.5	0.1	0.1	0	0.2	0.1	0.2	0.3	0.2	1.1	1.2	0.6	1.5	1.7	1.5	1.3	1.3	1	0.4	0.9	0	0.7	0.4	0.3
AgE04	3458	4177	AgE04_g001_t01	+	323	2	Lysosomal alpha-mannosidase			1.1	1.8	0.1	0	0	2	2.5	4.1	6.1	1.6	2.9	1.1	0.3	5.4	1.6	2	0.3	2.4	1.6	0.5	5.7	5.4	6.6	11.1	0
AgE04	12477	12809	AgE04_g002_t01	+	333	1	hypothetical protein		MSTRG.16484.4	3.9	3.7	0.4	0	0	0.4	0.1	0.4	0	0	0	0	0	0.3	0.2	0.1	0.5	0.4	0.3	0.2	0.8	0	0.9	0	0
AgE04	17381	18715	AgE04_g003_t02	+	287	2	U6 snRNA-associated Sm-like protein LSm4			1.8	0	0	0	0	0.3	0.5	0.2	0	0.6	1	2.9	5.2	1.4	8.3	8.3	5.5	2.1	0.7	0.2	0.5	0	0.1	0.1	0
AgE04	21244	28363	AgE04_g004_t05	-	3961	5	hypothetical protein		MSTRG.20529.2,MSTRG.20531.1	5.2	5.7	0.5	0	0.8	1.2	0.2	0.2	0	0	0.5	1.2	1.7	1.4	1.9	1.2	0.7	0.3	0	0.1	0.2	0	0	0	0
AgE04	28451	31059	AgE04_g005_t01	.	2609	1	hypothetical protein			0.8	0.3	0	0	0.1	0.6	0.4	0.2	0	0.1	0.2	0.4	10.9	0.4	0.9	1.2	43.1	0.4	0.1	0.2	0.1	0.7	0	0.1	0
AgE04	58085	61134	AgE04_g006_t11	+	1103	5	hypothetical protein	PgE396_g002_t01	MSTRG.22183.1,MSTRG.20523.1	67.3	145.8	81.3	1.1	11.5	0.1	0	0.1	0	0.1	0.2	0.3	0.2	0.2	1.4	1.2	0.3	0.2	0	0	0.2	0	0.8	0.1	0.4
AgE04	66766	75177	AgE04_g007_t14	-	1628	9	Sodium- and chloride-dependent neutral and basic amino acid transporter B(0+)	PgE010_g004_t04	MSTRG.23053.3	14.8	39.8	4.9	0.3	0.5	19.7	46.1	46.8	13.9	12.9	63.2	53.7	62.6	55.1	23	17.3	6.5	0.7	0.2	0.3	0.3	0	2.2	0.6	0.1
AgE04	75661	79533	AgE04_g008_t01	+	694	5	complement component c6		MSTRG.22389.7	0.1	0.2	0	0	0	0	0	0	0	0	0	0	0.1	0	0.1	0	0	0	0	0	0	0	0	0	0
AgE04	82176	89950	AgE04_g009_t05	-	3355	6	hypothetical protein	PgE290_g002_t05	MSTRG.23422.1	2.3	17.9	5.3	0.1	0.9	0	0	0	0	0	1.5	1.8	1.5	4	6	4.8	1.8	0.4	0	0	0.1	0	0.2	0	0
AgE04	90343	99350	AgE04_g010_t02	+	1803	11	hypothetical protein	PgE115_g001_t05,PgE290_g001_t01	MSTRG.20576.1	55.9	79.3	8.1	0.3	2.9	2.3	3.6	3.3	1	0.6	4.6	5.5	3.8	6	4.5	2.6	1.3	0.1	0	0.1	0.1	0	0.6	0.1	0.1
AgE04	104607	109467	AgE04_g011_t01	+	4433	2	hypothetical protein			2.3	0.5	0	0	0.1	2.1	1.6	1.8	1	1.7	9.9	6.5	5.3	7	8.7	8.3	2	1.1	0.3	0.4	0.2	0	0.5	0.2	0
AgE04	104776	115867	AgE04_g012_t01	-	5443	10	nuclear migration and anchoring protein unc-84	PgE041_g004_t02	MSTRG.23132.1,MSTRG.23131.2	6.4	1.5	0.4	0	1.1	13.7	9.1	9.3	3	1.7	8.7	7.8	6	11.8	9.2	10.4	5.7	1.2	0.3	0.3	0.2	0	0.5	0.2	0
AgE04	120178	122059	AgE04_g013_t01	.	1882	1	Putative uncharacterized transposon-derived protein F52C9.6	PgE006_g009_t01		1.9	1.9	0.5	0.1	0.2	0.8	0.3	0.3	0	0	0.3	0.2	0.8	0.3	0.6	0.6	0.5	0.6	1	1	1.1	0	0.1	0.1	0.3
AgE04	122100	127510	AgE04_g014_t01	+	333	4	hypothetical protein	PgE019_g004_t01	MSTRG.23483.1,MSTRG.23371.1,MSTRG.17223.2,MSTRG.17401.1	0.3	0	0	0	0	1.6	0.3	0.2	0	0	0	0	0.5	0.2	0.8	0.3	0	0	0	0	0	0	0	0	0
AgE04	137196	139234	AgE04_g015_t01	-	411	3	Methyltransferase Y17G7B.18			0	0	0.1	0	0	0	0	0	0	0	0	0	0	0	0	0	0	0	0	0	0	0	0	0	0
AgE04	140894	141588	AgE04_g016_t01	-	240	2	putative methyltransferase			2.3	0.1	0	0.1	0	5.2	0.7	0.7	0	0	0.7	2.2	1.3	0.5	0	0	0	0	0	0	0	0	0	0	0
AgE04	192479	205878	AgE04_g017_t01	+	1642	9	hypothetical protein	PgB20_g058_t01,PgE280_g002_t04,PgE020_g002_t01	MSTRG.22259.5,MSTRG.17390.5,MSTRG.21582.1	26.1	6.7	2.3	0.7	4.3	122.9	186.5	188.3	65.7	49.6	269.5	203.7	180	260.9	170.2	116	45.8	3.8	0.7	1.4	1.9	1.1	8.3	2.1	0.1
AgE04	209139	223403	AgE04_g018_t07	-	2225	13	Tyrosine-protein kinase Fer, partial	PgB37_g005_t03,PgE088_g002_t01,PgE056_g003_t06,PgE277_g001_t02,PgB25_g019_t01,PgE063_g004_t02,PgE002_g006_t01,PgE001_g002_t01,PgE381_g001_t01,PgE222_g001_t02,PgE080_g003_t01,PgE039_g003_t02,PgE021_g005_t04,PgE028_g001_t03	MSTRG.23400.4,MSTRG.7427.1,MSTRG.23443.1,MSTRG.23125.4,MSTRG.23796.1,MSTRG.19994.2,MSTRG.19994.2,MSTRG.21580.2,MSTRG.17933.1,MSTRG.18317.15,MSTRG.22069.3,MSTRG.21941.1,MSTRG.21090.8,MSTRG.21090.8,MSTRG.23481.2,MSTRG.22241.1,MSTRG.19573.8,MSTRG.20759.5,MSTRG.16581.1,MSTRG.23332.3,MSTRG.8296.2,MSTRG.20409.5,MSTRG.16870.5,MSTRG.11670.1,MSTRG.20803.1,MSTRG.21745.1,MSTRG.23672.1	19.3	26.8	2.6	0.1	0.8	0.2	0.2	0.4	0.5	0.4	3.3	2.3	1.9	3	4.3	4.2	1.6	0.2	0	0	0	0	0.2	0.1	0
AgE04	225976	256138	AgE04_g019_t01	+	17325	12	Excitatory amino acid transporter	PgE048_g002_t02,PgE302_g001_t01,PgB17_g069_t01,PgE465_g001_t02	MSTRG.19190.1,MSTRG.17757.1,MSTRG.17757.1,MSTRG.21657.6,MSTRG.21657.6,MSTRG.23780.3,MSTRG.23780.3,MSTRG.23780.3,MSTRG.21658.1	26.3	66.3	8.9	0.3	4.2	3.4	1.4	1.5	0.8	0.6	3.4	3.5	3.5	5.3	8.3	11.1	9.2	2.4	0.7	0.3	0.4	0.3	0.7	0.2	0.1
AgE04	242346	256165	AgE04_g020_t06	-	2360	12	heat shock protein hsp 90-alpha		MSTRG.21868.2,MSTRG.21868.2,MSTRG.21869.1	64.5	209.9	25	0.3	4.2	1.3	0.7	0.9	0.9	2	10.1	9	14.2	12	16.5	18.3	9.1	2.3	0.6	0.4	0.4	0	1.2	0.2	0.3
AgE04	269372	279411	AgE04_g021_t04	+	4922	6	Transcription initiation factor TFIID subunit 7	PgE091_g001_t01	MSTRG.22531.1,MSTRG.22532.1	61.6	8.4	2	0.1	10	21.7	32.6	28	6.5	3.8	17.4	17.6	17.2	14.2	21.4	34.7	39.2	16.2	5.1	2	2.2	0.7	2	1	0.2
AgE04	276180	287144	AgE04_g022_t01	-	1464	12	hypothetical protein			11.7	54	4.6	0	2.1	0.6	0.3	0.2	0.2	0.1	0.5	1.4	0.3	1.2	3	2.2	1.1	0.1	0	0.1	0.1	0	0.2	0	0
AgE04	284315	285679	AgE04_g023_t01	-	339	3	hypothetical protein	PgE347_g001_t06	MSTRG.20527.5,MSTRG.23674.1,MSTRG.23543.6,MSTRG.23542.13	6	35.5	4.2	0	0.8	0.2	0.5	0.3	0	0	1.1	1.2	0.5	2.3	1.9	1.9	0	0.1	0	0	0	0	0.2	0.1	0
AgE04	291211	308068	AgE04_g024_t03	-	5562	11	Polyadenylate-binding protein 1	PgE407_g001_t02,PgE407_g001_t02	MSTRG.21686.2,MSTRG.18838.3,MSTRG.7993.2,MSTRG.7993.2,MSTRG.7993.2,MSTRG.7993.2,MSTRG.7993.2,MSTRG.7993.2,MSTRG.7993.2,MSTRG.7993.2,MSTRG.17396.1,MSTRG.20533.4,MSTRG.3004.1,MSTRG.9590.1	43.7	61.9	7.9	0.2	6	11.4	6.7	6.6	2	1.2	7.9	9.9	8.6	7.5	11.2	12.6	8.1	1.1	0.4	0.5	0.6	0	0.6	0.3	0.1
AgE04	328177	333594	AgE04_g025_t01	-	581	3	hypothetical protein		MSTRG.23192.2	21.1	29.3	1.7	0	2.2	0	0	0	0.4	0	0.5	0.6	0.8	0.5	0.6	1.2	0.2	0.3	0	0.1	0	0	0	0	0
AgE04	337454	348856	AgE04_g026_t02	+	2298	7	Acyl-protein thioesterase 1	PgE002_g005_t01	MSTRG.11413.2,MSTRG.11413.2,MSTRG.11413.2,MSTRG.18616.4,MSTRG.23056.2,MSTRG.23055.2	18.9	41	11.5	0.2	2.3	0.6	0.5	0.5	0.2	0.1	0.5	0.4	0.3	0.5	0.6	0.1	0	0	0	0	0	0	0.1	0	0
AgE04	337469	348836	AgE04_g027_t01	-	6399	3	Acyl-protein thioesterase 1			5.2	10.8	1	0	0.6	0	0.1	0	0	0	0.3	0.2	0.3	0.3	0.5	0.3	0.2	0	0	0	0	0	0	0	0
AgE04	352964	359733	AgE04_g028_t03	+	1935	6	hypothetical protein		MSTRG.22196.2,MSTRG.24065.3,MSTRG.24065.3,MSTRG.24065.3,MSTRG.22540.1	10.4	1.3	0.5	0	0.8	15.1	13.7	14	8	18.2	86.2	69.9	32.9	64.3	93.2	88	35.3	11.1	1.7	1.7	2	0	2.9	0.5	0
AgE04	360576	374797	AgE04_g029_t08	+	2727	10	Tyrosine-protein kinase kin-31	PgE002_g006_t01,PgE001_g002_t01,PgE063_g004_t02,PgE056_g003_t06,PgE088_g002_t01,PgB25_g019_t01,PgB37_g005_t03,PgE277_g001_t02	MSTRG.19573.8,MSTRG.19573.8,MSTRG.23443.1,MSTRG.23125.4,MSTRG.23400.4,MSTRG.19994.2,MSTRG.17933.1,MSTRG.7427.1,MSTRG.23481.2,MSTRG.23796.1,MSTRG.21580.2	14.6	62.5	8	0.2	2	0	0	0	0.2	0	0.4	0.6	0.3	0.5	0.7	0.5	0.2	0	0	0	0	0	0.1	0	0
AgE04	378767	389201	AgE04_g030_t03	-	1467	4	hypothetical protein		MSTRG.23466.4,MSTRG.23467.1	7.6	7.3	0.7	0.1	0.7	0.1	0	0	0	0	0.3	0.1	0.2	0	0.2	0.1	0	0	0	0	0	0	0	0	0
AgE04	391538	393341	AgE04_g031_t01	-	267	2	hypothetical protein			0.7	0.1	0	0	0	0	0	0	0	0	0.3	0.8	0	0.4	0.2	0	0	0	0	0	0	0	0	0	0
AgE04	394085	411801	AgE04_g032_t03	+	6730	12	eukaryotic translation initiation factor 3 subunit i	PgE378_g001_t01,PgE417_g001_t03,PgE038_g004_t01	MSTRG.18407.4,MSTRG.22438.3,MSTRG.22438.3,MSTRG.22438.3	5.2	4.1	0.6	0	1.8	4	3.4	3.3	3	2.5	15.9	14.2	18.1	16	13.1	13.2	5.9	1.3	0.4	0.4	0.4	0	0.6	0.2	0
AgE04	405934	425326	AgE04_g033_t01	-	7581	13	2-oxoglutarate dehydrogenase	PgE001_g001_t03,PgE002_g008_t01	MSTRG.20802.2	19.8	27.6	2.6	0.1	1	2.3	3.3	3	0.5	0.6	5.1	4.9	4.1	4.9	5	3.6	1.4	0.4	0.2	0.2	0.2	0	0.3	0.1	0
AgE04	441782	468636	AgE04_g034_t02	+	3864	10	Shaggy-related protein kinase gamma	PgE028_g001_t03,PgB02X_g220_t02,PgE200_g001_t01,PgB02X_g221_t01,PgE025_g001_t01,PgE126_g003_t01,PgE222_g001_t02,PgE348_g001_t01,PgE039_g003_t02,PgB25_g019_t01,PgB37_g005_t03	MSTRG.21893.3,MSTRG.21893.3,MSTRG.16870.5,MSTRG.21423.2,MSTRG.16581.1,MSTRG.23672.1,MSTRG.20803.1,MSTRG.21941.1,MSTRG.20625.12,MSTRG.20625.12,MSTRG.20937.1,MSTRG.20409.5,MSTRG.12983.2	19.9	43.3	4.6	0.1	1.5	2.6	1.8	1.8	0.2	0.3	2.7	2.8	3.6	4.5	8	7.3	4.3	0.3	0.1	0.2	0.1	0	0.2	0	0
AgE04	469252	481465	AgE04_g035_t02	+	3517	8	Protein phosphatase 1 regulatory subunit 7	PgE067_g004_t01,PgE067_g003_t01,PgE067_g003_t01,PgE067_g003_t01,PgE067_g003_t01	MSTRG.21892.1,MSTRG.22167.7	15.1	49.2	2.4	0.1	1.7	0.1	0	0	0.1	0	0.3	0.1	0.3	0.4	0.2	0.3	0.2	0	0	0	0	0	0.2	0	0
AgE04	482772	496517	AgE04_g036_t02	+	702	4	Eukaryotic translation initiation factor 2 subunit 3-like protein	PgE045_g002_t05	MSTRG.23886.4	5.7	18.9	4.2	0.1	0.4	0	0.1	0	0	0	0.4	0.1	0	0.4	0.6	0.2	0	0	0	0	0	0	0	0	0
AgE04	490624	496730	AgE04_g037_t02	-	2172	4	btb poz domain containing protein		MSTRG.18618.5,MSTRG.23607.1	3.1	14.8	2.4	0.1	0.3	0.1	0	0	0.1	0	0.4	0	0.1	0.4	0.3	0.1	0.1	0	0	0	0	0	0.1	0	0
AgE04	500681	512084	AgE04_g038_t05	+	771	4	hypothetical protein			2.3	3.7	0.1	0	0.1	0.4	0.3	0.7	0	0	1.9	0.5	1.2	0.6	0.9	0.9	0.1	0	0	0	0.1	0	0.1	0	0
AgE04	509247	519392	AgE04_g039_t05	-	1446	7	hypothetical protein	PgE020_g003_t03	MSTRG.22656.1	4.7	12.3	0.9	0	0.2	0.1	0.1	0	0	0.1	0.3	0.8	0.3	0.8	0.8	0.9	0.2	0	0	0	0	0	0	0	0
AgE05	9400	20414	AgE05_g001_t01	+	4469	6	Lipoma-preferred partner	PgE149_g001_t01		8	17.4	5.3	0.2	0.7	2.2	0.6	0.7	0	0.1	1	0.9	3	1.4	2.9	1.9	4.7	0.9	0.1	0.1	0.4	0	0.2	0	0
AgE05	27501	33147	AgE05_g002_t01	-	1041	7	Serine/threonine-protein kinase	PgE149_g003_t02,PgE078_g001_t01,PgE498_g001_t01,PgB10_g103_t01,PgE021_g005_t04,PgB22_g041_t04,PgB25_g018_t01,PgE232_g001_t04,PgE156_g001_t11,PgE111_g002_t03,PgE397_g001_t01,PgE034_g004_t01	MSTRG.23052.1,MSTRG.13368.2,MSTRG.13365.1,MSTRG.19589.1,MSTRG.23846.1,MSTRG.20353.1,MSTRG.22718.1,MSTRG.20782.13,MSTRG.20782.13,MSTRG.17769.3,MSTRG.21667.1,MSTRG.22673.1,MSTRG.16874.1,MSTRG.22167.7,MSTRG.20059.1,MSTRG.18753.1,MSTRG.23426.4,MSTRG.22376.1,MSTRG.21747.2,MSTRG.21745.1,MSTRG.18388.5,MSTRG.17766.1,MSTRG.13370.1,MSTRG.13370.1,MSTRG.22403.2	15.4	14.7	1.6	0.2	1.4	3.1	3.2	5.1	0.7	0.5	3.5	2.5	2.5	7.1	19.7	12.1	3.4	0.2	0.2	0.2	0.2	0	0.2	0	0
AgE05	34238	39215	AgE05_g003_t02	+	2834	3	hypothetical protein	PgE149_g004_t01	MSTRG.20183.3	5	1.4	0.1	0	1.5	4.4	2.1	2.4	1.1	1.1	7.4	6.4	6.4	15.2	19.3	18	8.6	1.6	0.5	0.7	0.8	0	0.4	0.2	0
AgE05	40751	43852	AgE05_g004_t04	+	1117	3	hypothetical protein			20.2	4.6	1.9	0.1	5.2	12.3	8.2	8	2	4.1	26.3	21.3	15.2	45.7	75.6	87.7	31.9	6.6	1.9	1.9	2.3	0	2.6	0.9	0.2
AgE05	44502	77928	AgE05_g005_t04	-	5394	20	Cell division control protein 42	PgE172_g002_t03,PgE341_g001_t01,PgE103_g005_t02,PgE242_g001_t05	MSTRG.20001.2	19.8	116.9	10.1	0.2	3	0.4	0.1	0.1	0.1	0.4	2.5	1.2	1.4	1.7	3.1	2.2	1	0.2	0.1	0.1	0.2	0	0.4	0	0
AgE05	61544	63123	AgE05_g006_t01	+	458	2	hypothetical protein	PgE341_g001_t01	MSTRG.20001.2	19.9	81.3	12.4	0.1	1.9	1.5	2.3	2.4	0.2	0	1.7	2.5	1	2	2.2	3.3	0.7	0	0	0	0.1	0	0	0	0
AgE05	87573	87998	AgE05_g007_t01	.	426	1	hypothetical protein			4.1	5.9	0.6	0	1.8	2.5	1.4	1.9	0	0	0.5	0	0	0.2	3.3	2.4	0.8	0.5	0.2	0	0.3	0	0	0	0
AgE05	138120	169470	AgE05_g008_t17	-	4080	6	Ran-binding protein 9			20.6	5.8	1.3	0.5	2.7	19.5	6.9	7.6	1.2	2.5	11.3	13.7	17.2	15	93.5	84.1	85.3	28.4	10.8	11.4	13.4	3	1.9	0.5	0.3
AgE05	135410	136427	AgE05_g009_t01	.	1018	1	hypothetical protein			1	0.3	0.2	0	0.2	4.3	0.4	0.3	0	1.6	6.1	9.1	7.2	3	20.6	11.5	7	13.9	2.2	3.1	4.2	0	0	0	0
AgE05	160174	181511	AgE05_g010_t05	+	4169	6	Hemicentin-2, partial			5.4	2.6	0.6	0	0.8	21.2	12.1	12.3	2	0.5	1.8	3.2	4.5	8.7	24.9	30.2	23.5	5.6	1.3	1.4	1.2	0.4	0.4	0.4	0
AgE05	181771	198391	AgE05_g011_t03	+	4863	9	Serine/threonine-protein phosphatase PP1-alpha	PgE043_g004_t02,PgE056_g002_t02,PgE094_g001_t03,PgE088_g001_t01,PgE215_g001_t01,PgE014_g005_t01,PgE008_g005_t01	MSTRG.21870.4,MSTRG.21870.4,MSTRG.21515.4,MSTRG.21515.4,MSTRG.22900.4,MSTRG.23250.2,MSTRG.22337.1,MSTRG.23946.1,MSTRG.7423.3,MSTRG.13356.2,MSTRG.13356.2	7.6	32.8	8.2	0	1.1	0.3	0.1	0.2	0	0.1	0.2	0.5	0.3	0.6	2.8	2.3	3.4	0.2	0	0.1	0.1	0	0.2	0	0
AgE05	212594	224447	AgE05_g012_t01	-	7318	7	Patched domain-containing protein 3			0.3	1.9	0.6	0	0.2	1	0.8	0.7	0.7	0.5	1.1	0.8	0.5	1.5	2.5	1.4	9.1	2.1	0.4	0.3	0.3	0.2	0.7	0.8	0.4
AgE05	236332	241944	AgE05_g013_t02	+	838	3	hypothetical protein		MSTRG.23083.3,MSTRG.22604.2	5	8.7	0.6	0.1	0.3	0	0	0	0	0.1	0.1	0	0	0.2	0.1	0.3	0.3	0	0	0	0	0	0	0	0
AgE05	248542	259030	AgE05_g014_t03	+	1337	7	Sperm vesicle fusion protein fer-1, partial	PgE142_g001_t03	MSTRG.24106.2	28.5	41.7	4	0.2	0.6	0.1	0.1	0.1	0	0	0.1	0.1	0	0.1	0.3	0.3	0	0	0.1	0.1	0	0	0.1	0	0
AgE05	323378	334489	AgE05_g015_t02	-	1113	7	hypothetical protein	PgE141_g001_t01,PgE143_g001_t02	MSTRG.20004.1	36.7	71	9.9	0.3	2.6	0.2	0.2	0.3	0	0.1	0.5	2.2	0.4	1	2.2	1.7	0.9	0	0	0	0.1	0	0.4	0	0.2
AgE05	334647	347959	AgE05_g016_t01	+	9631	2	NEDD8			12.5	13.6	1.6	0	0.6	0.1	0.1	0.1	0	0	0.3	0.3	0.8	0.3	1	0.7	0.7	0.1	0	0	0	0.2	0.1	0	0
AgE05	337677	347959	AgE05_g017_t01	-	3993	4	NEDD8			40.7	36.9	4.3	0.2	2.8	0.7	0.4	0.3	0.1	0.2	0.6	0.4	1	0.5	1.7	1.3	1.8	0.2	0	0	0.1	0	0.2	0	0.2
AgE05	354871	359282	AgE05_g018_t06	-	4412	1	hypothetical protein			8.9	1.5	0.2	0	0.1	12.7	5.6	4.9	0.7	1.2	4.8	3.5	3.3	5.3	7.9	4.4	2.8	0.9	0.3	0.3	0.3	0	0.2	0.1	0.1
AgE05	360625	361008	AgE05_g019_t01	+	384	1	hypothetical protein			0	0	0	0	0	0	0	0	0	0	0	0	0	0	0	0	0	0	0	0	0.1	0	0	0	0.1
AgE05	361659	362053	AgE05_g020_t01	.	395	1	hypothetical protein			0.3	0.3	0.7	0	0	0.2	0.1	0.2	0	0	0	0.8	1.1	0.2	0.1	0.6	0.8	0.5	0.4	1.1	0.7	0	0.4	0.1	0.8
AgE05	363390	365719	AgE05_g021_t01	+	747	3	hypothetical protein	PgE363_g002_t01,PgE660_g001_t01	MSTRG.16484.4	1.9	1.4	1.1	0	0.2	0.6	0.1	0.1	0	0.3	0	0.4	0.5	0.4	0.3	0.2	0.9	0.3	0.6	0.5	1.2	0	0.5	0.1	2.5
AgE05	367214	375218	AgE05_g022_t01	-	5728	8	zinc c2h2 type family protein	PgB28_g015_t01,PgE157_g001_t01,PgE044_g003_t01,PgE272_g001_t01		123.8	181.3	1831.1	22.8	2457.6	25.4	48.6	56.2	31	0.9	2.8	1.5	1.4	0.5	0.9	0.4	5.8	1.3	1	1	1.3	1.5	6.6	0.5	0.6
AgE05	380414	386479	AgE05_g023_t06	+	2830	4	serine threonine-protein kinase sax-1			2.1	0.8	0.2	0	0.9	3.8	1.1	0.9	0.2	0.3	2.4	2.7	1.3	2.9	4.8	6.1	7.6	2.9	1	0.6	0.8	0.6	0.3	0.2	0
AgE05	386606	403083	AgE05_g024_t06	-	2152	7	hypothetical protein	PgE044_g002_t02	MSTRG.19782.1,MSTRG.23748.1	23.7	13.6	4.9	0.4	3.5	86.8	151.2	139	23.2	17.4	44	43.4	39.5	47.2	24	15.1	9.9	1.6	0.7	0.8	1.1	0	1.3	0.6	0
AgE05	411849	412085	AgE05_g025_t01	-	237	1	hypothetical protein			0.6	2.1	0.9	0	0	0	0	0	0	0	0	0.9	0	0.6	0.6	0.2	0	0	0	0	0	0	0	0	0
AgE05	414061	419412	AgE05_g026_t01	+	2181	4	Retinal homeobox protein Rx			2.6	6.3	0.9	0.1	0.3	1.7	3.1	3.1	0.3	0.3	2.2	2.2	2.4	3.2	1.8	1.2	0.8	0.2	0.1	0.2	0.4	0	0.2	0.1	0.1
AgE05	420004	423138	AgE05_g027_t01	+	1957	4	zinc c2h2 type family protein			1.8	2	0.1	0	0	2.3	0.3	0.3	0	0	0.1	0.3	0.4	0.2	0.1	0	0	0	0	0	0	0	0	0	0
AgE05	425061	434136	AgE05_g028_t01	-	3694	2	gag-pol polyprotein	PgE296_g002_t01	MSTRG.24235.1,MSTRG.24236.1,MSTRG.21360.1,MSTRG.18626.6,MSTRG.22574.6,MSTRG.22392.9	3	2.9	0.3	0	0	1.3	0.3	0.2	0	0	0	0.3	0	0.1	0.2	0.1	0.1	0	0	0	0	0	0	0	0
AgE05	436876	438638	AgE05_g029_t04	+	1763	1	hypothetical protein			4.9	5.3	0.8	0	0.1	0	0	0	0	0	0	0.1	0.3	0.2	0	0	0	0	0	0	0	0	0	0	0
AgE05	453388	455954	AgE05_g030_t01	+	303	2	Major sperm protein	PgE120_g002_t03	MSTRG.21634.2,MSTRG.17381.1	5.5	19.6	3.2	0.1	2.5	0	0	0	0	0	0.3	0.5	0.5	0.4	1	0.2	1.1	0	0	0	0	0	0	0	0.1
AgE05	459909	461248	AgE05_g031_t01	+	1340	1	Craniofacial development protein 2, partial			1.2	3.7	0.2	0	0.1	0.1	0.1	0	0	0	0	0	0.1	0	0	0	0.1	0.2	0.2	0.1	0.4	0	0	0	0.1
AgE06	497	830	AgE06_g001_t01	-	183	2	Voltage-dependent calcium channel subunit alpha-2/delta-2			2	1.6	15.3	1.4	2.1	7.4	6.4	10.1	6	2.4	5.1	3.7	4.3	13	6.1	4.3	0.3	0.2	0	0.8	8.8	9.4	0.3	0.1	2.4
AgE06	4598	17824	AgE06_g002_t01	+	2933	10	Apoptotic chromatin condensation inducer in the nucleus	PgB34_g005_t01,PgB34_g005_t01		8.3	1.1	0.3	0	2.4	9.2	6.4	5.9	1.2	1	10	8.3	6.7	7.7	9	7.6	4.5	0.9	0.2	0.2	0.4	0	0.4	0.2	0
AgE06	24536	35368	AgE06_g003_t03	-	1676	7	serine arginine-rich splicing factor 5	PgE021_g006_t03,PgE135_g001_t01	MSTRG.22108.1,MSTRG.18748.3,MSTRG.18748.3,MSTRG.8296.2,MSTRG.23500.1	17	16.9	2	0.1	0.7	0.6	0.6	0.6	0.7	2.5	8.1	4.9	3	2.8	2.3	1.1	0.4	0.1	0	0	0.1	0	0.5	0.1	0.1
AgE06	38717	42951	AgE06_g004_t02	+	1924	3	bifunctional arginine demethylase and lysyl-hydroxylase psr-1			0.9	0.3	0.6	0.1	0.6	1	0.6	0.7	0.6	0.4	1.2	0.9	0.2	1.9	1.8	2.1	2	3.6	5	3.7	2.2	1.8	0.2	0.2	0.2
AgE06	52646	58199	AgE06_g005_t01	+	1746	5	hypothetical protein			0.1	0.1	0.1	0	0	0.1	0.1	0	0	0	0.2	0.3	0.6	0.1	0.6	0.2	0	0	0	0	0.2	0	4.7	1.1	4.1
AgE06	58262	73704	AgE06_g006_t01	+	2998	11	Tau-tubulin kinase 1	PgE059_g007_t01,PgB22_g041_t04,PgB25_g018_t01,PgE078_g001_t01,PgB10_g103_t01,PgE021_g005_t04,PgE232_g001_t04,PgE149_g003_t02,PgE156_g001_t11,PgE111_g002_t03,PgE498_g001_t01,PgE397_g001_t01,PgE088_g002_t01,PgB41X_g003_t01,PgB25_g019_t01	MSTRG.22673.1,MSTRG.17769.3,MSTRG.22376.1,MSTRG.16874.1,MSTRG.23052.1,MSTRG.13365.1,MSTRG.13368.2,MSTRG.19589.1,MSTRG.22167.7,MSTRG.22718.1,MSTRG.23846.1,MSTRG.21667.1,MSTRG.20782.13,MSTRG.20353.1,MSTRG.20059.1,MSTRG.21745.1,MSTRG.18753.1,MSTRG.23426.4,MSTRG.21747.2,MSTRG.18388.5,MSTRG.22403.2,MSTRG.21615.1,MSTRG.17765.1,MSTRG.21655.5,MSTRG.21655.5,MSTRG.20409.5	32.1	78.3	11.3	0.2	2.7	0.2	0.1	0.1	0.1	0.1	0.3	0.3	0.2	0.3	0.4	0.5	0.2	0.1	0	0	0	0	0.2	0.1	0
AgE06	73705	105547	AgE06_g007_t07	-	5799	30	cytoplasmic fmr1-interacting protein-like protein	PgE059_g005_t01		9.1	16.2	1.8	0.1	1.3	3.2	3.2	3	0.9	0.6	5.8	8.1	14.8	19.4	14.8	18.7	14.6	0.9	0.3	0.2	0.2	0	0.5	0.1	0
AgE06	74321	94318	AgE06_g008_t01	.	19998	1	cytoplasmic fmr1-interacting protein-like protein			3.7	4.9	0.5	0	0.3	0.8	0.6	0.7	0.1	0.2	1.9	2.5	4	5.4	5.1	5.6	3.8	0.3	0.1	0.1	0.1	0	0.1	0	0
AgE06	106665	111834	AgE06_g009_t07	-	2098	4	hypothetical protein		MSTRG.5624.7	4.8	9.2	1.5	0.2	0.3	0	0.1	0	0	0	0.2	0.3	0.6	0.3	0.2	0.1	0.1	0	0	0	0	0	0.1	0	0
AgE06	114456	116373	AgE06_g010_t01	-	1299	3	Ubiquitin-conjugating enzyme E2 2	PgE111_g001_t01,PgE109_g003_t01,PgE109_g002_t01,PgE030_g001_t02	MSTRG.17394.1,MSTRG.8297.2,MSTRG.22259.5,MSTRG.13376.1,MSTRG.16583.3,MSTRG.16583.3,MSTRG.18545.1,MSTRG.18751.1,MSTRG.1696.1,MSTRG.21511.1,MSTRG.7436.1,MSTRG.21512.1,MSTRG.21589.1,MSTRG.22898.1	61.4	8.9	1.2	0.2	14.4	27.8	9.6	10.3	1.8	4.9	25.2	31.9	36.1	14.3	11.2	6.6	3.4	0.4	0	0.1	0.1	0	1.6	0.5	0.1
AgE06	134754	151165	AgE06_g011_t09	+	4866	12	hypothetical protein	PgE039_g002_t01	MSTRG.21599.1	12.1	31.4	6	0.1	1.5	0.1	0.1	0	0	0.1	0.4	0.5	0.5	0.4	0.8	0.3	0.2	0.1	0.1	0	0.1	0	0.1	0	0
AgE06	156599	158959	AgE06_g012_t04	+	1195	3	Hemicentin-2			1.9	2	0.5	0	0.7	1	1.3	1.3	0.1	0.2	2.2	1.4	0.6	1.5	6	5.2	2.1	0.8	1	0.7	0.8	0	0.7	1.9	0
AgE06	160742	171584	AgE06_g013_t01	+	3448	7	Proto-oncogene serine/threonine-protein kinase pim-1	PgE039_g003_t02,PgE222_g001_t02,PgE025_g001_t01,PgE277_g001_t02,PgB10_g103_t01,PgE088_g002_t01,PgB02X_g220_t02,PgE028_g001_t03	MSTRG.12983.2,MSTRG.12984.2,MSTRG.12984.2,MSTRG.12984.2,MSTRG.21875.2,MSTRG.21875.2,MSTRG.21875.2,MSTRG.21876.1,MSTRG.21876.1,MSTRG.21941.1,MSTRG.22069.3,MSTRG.16581.1,MSTRG.20409.5,MSTRG.20803.1,MSTRG.22241.1,MSTRG.23672.1,MSTRG.21893.3,MSTRG.23332.3,MSTRG.16870.5	20.4	3	0.9	0.3	1.5	66.6	95.6	93.1	36.7	28.8	154.7	73.2	32.7	24.8	20.6	13	6.6	0.8	0.6	0.3	0.4	0.5	2	0.5	0
AgE06	169066	196294	AgE06_g014_t03	-	7203	14	Propionyl-CoA carboxylase beta chain, partial	PgE039_g005_t03	MSTRG.21397.2,MSTRG.21095.1	121	108.9	12.1	0.6	8.6	65.8	46.2	46.3	8.2	17.8	106.1	52.5	32	16.6	16.6	20.6	19.7	3.1	0.5	0.6	0.7	0.2	1.6	0.6	0.2
AgE06	174104	185529	AgE06_g015_t01	+	10484	2	propionyl- carboxylase beta		MSTRG.21397.2,MSTRG.21095.1	36.7	29.5	3.1	0.1	2.2	11.6	8.3	7.6	0.5	0.3	2.1	2.6	3.4	2.2	2.5	3.8	4.4	0.6	0.1	0.1	0.1	0	0.3	0.1	0
AgE06	185856	194616	AgE06_g016_t02	+	7165	2	propionyl- carboxylase beta			23.5	28.5	3	0.1	1.7	13.7	6	6.8	0.6	0.5	3.2	3.3	2.7	3	3.5	4.9	3.5	1	0.1	0.2	0.2	0	0.2	0.1	0
AgE06	198455	213672	AgE06_g017_t03	+	2274	10	hypothetical protein	PgE258_g001_t02,PgE345_g001_t01		16.4	2.2	0.8	0.1	3.5	45.3	20.3	19.6	3.3	3.8	19.2	17.9	12.6	27.5	21.5	22.9	10.8	3.7	0.7	1.1	1	0	0.9	0.5	0.1
AgE06	221061	245239	AgE06_g018_t05	-	4563	18	Sodium/potassium-transporting ATPase subunit alpha-1, partial	PgE016_g004_t02	MSTRG.23055.2,MSTRG.23055.2,MSTRG.23056.2	21.9	34.5	2.9	0.1	5.3	32.4	21.2	21.1	3.9	3.7	15.3	15.2	12.5	19.8	17.4	20.7	11.6	2.6	0.3	0.5	0.6	0.4	1.1	0.4	0
AgE06	254013	285919	AgE06_g019_t04	-	2668	14	hypothetical protein	PgE016_g003_t05	MSTRG.10325.2	20.4	45.8	5.6	0.1	2.7	4.9	1.1	1.3	0.2	0	0.4	0.7	0.4	0.6	1.2	1.1	1	0.2	0	0.1	0.1	0	0.2	0	0
AgE06	320135	338736	AgE06_g020_t05	+	1504	12	ubiquitin carboxyl-terminal hydrolase 7	PgB22_g042_t04	MSTRG.20522.1,MSTRG.21577.15,MSTRG.20880.1	37	6.5	1.4	0	7.6	37.5	11.3	13	3.2	0.5	5.4	8.2	10.9	16	18.8	17.4	13.8	1.7	0.4	0.4	0.4	0	0.1	0.2	0
AgE06	355639	362905	AgE06_g021_t02	-	1447	4	bromodomain-containing protein 2		MSTRG.22101.15,MSTRG.22103.1	23	2.6	0.7	0	5.1	8.5	7.3	7.4	1.4	0.7	6.4	5.4	5.1	6.4	5.1	2.4	0.6	0.2	0	0.1	0	0	0.2	0.2	0
AgE06	363132	363714	AgE06_g022_t01	.	583	1	neuroglian			2.9	0.2	0	0	1.1	0.5	0	0	0	0	0.5	0.2	0	0.1	0.3	0.3	0	0	0	0	0	0	0	0	0
AgE06	366116	388816	AgE06_g023_t02	-	7018	18	Neuroglian	PgE219_g001_t01,PgE364_g001_t02	MSTRG.22905.1,MSTRG.22905.1	29.7	3.7	1.1	0.2	7.1	46	25.9	26.4	6.7	8	77.3	67.3	52.1	50.2	49.2	36.3	16.6	2.1	0.5	0.7	0.7	0.2	1.4	1	0
AgE06	385614	400603	AgE06_g024_t02	+	5955	12	Lamin-1	PgB34_g005_t01,PgB34_g006_t01,PgE188_g001_t03	MSTRG.21940.4,MSTRG.22743.10,MSTRG.22743.10,MSTRG.22744.1,MSTRG.21942.1,MSTRG.22470.1	18.4	3.9	0.6	0.1	9.5	16.1	12.1	12.3	3.9	3.4	29.3	31.2	30.6	31.8	30	38.7	24.9	3.3	0.6	0.7	0.7	0	1	0.4	0
AgE06	414721	416285	AgE06_g025_t02	+	613	2	hypothetical protein			5.7	4.1	0.7	0	0.5	0.6	0.5	0.1	0	2	8.7	31.6	54.8	32.5	57.4	45.5	92.5	30.4	7.3	4.8	3	5.6	2.4	2.3	0.8
AgE07	6411	22462	AgE07_g001_t02	-	1660	6	hypothetical protein		MSTRG.23157.1,MSTRG.21020.1,MSTRG.21682.1,MSTRG.24228.2,MSTRG.21076.1,MSTRG.20784.1,MSTRG.19783.6	14.3	66.5	5.8	0.2	2.3	1.8	0.9	0.7	0.1	0.5	3.7	3.6	3.4	4.6	5.5	5.6	4.9	1	0.2	0.1	0.4	0	0.2	0.1	0.1
AgE07	25928	27156	AgE07_g002_t03	+	968	2	hypothetical protein			1.7	3	0.5	0	0.3	0	0	0	0	0	0.4	0.5	1.7	0.7	0.6	0.7	0.3	0	0	0	0	0	0	0	0
AgE07	28005	65825	AgE07_g003_t01	+	2582	4	hypothetical protein			28.9	47.4	5.2	0	0.7	0	0	0	0	0	0.5	0.9	1.6	0.8	0.8	0.2	0.2	0.1	0	0.2	0.1	0	0.1	0	0.1
AgE07	30207	62377	AgE07_g004_t04	-	10857	13	hypothetical protein	PgE036_g001_t03,PgB25_g020_t03	MSTRG.21252.1,MSTRG.22383.1,MSTRG.17934.6,MSTRG.17934.6,MSTRG.22868.1,MSTRG.22868.1,MSTRG.21254.2,MSTRG.21255.8,MSTRG.21255.8,MSTRG.21255.8,MSTRG.4189.1	20	56.3	4.6	0.1	1	0	0	0	0.1	0	0.4	0.5	0.9	1	0.7	0.2	0.1	0	0	0	0	0	0.1	0	0
AgE07	45829	47427	AgE07_g005_t01	.	1599	1	hypothetical protein			19.7	39.1	5	0	0.1	0	0.2	0	0	0	0	0.2	0.2	0.1	0.2	0.1	0.1	0	0	0	0	0	0	0	0
AgE07	73274	78637	AgE07_g006_t01	.	5364	1	hypothetical protein			2.5	10.4	0.7	0	0.3	0	0	0.1	0	0	0.9	1.1	1.2	2.7	1.5	0.2	0.1	0	0	0	0	0	0	0	0
AgE07	79101	90704	AgE07_g007_t01	-	4769	5	hypothetical protein	PgE319_g001_t01	MSTRG.21362.1	11	16.4	5.4	0.2	1	0.1	0.1	0.2	0.3	0.4	5.3	9.5	13.9	12.4	14.6	8.1	18.2	6.1	1.6	1.6	1.1	0.7	0.7	0.2	0.3
AgE07	98572	105462	AgE07_g008_t01	+	5465	3	hypothetical protein			4.2	2.5	0.4	0	0.4	3.1	3.6	3.3	0.8	1.6	12.1	12.1	12.4	12.6	5.7	4.7	2.1	0.2	0	0	0.1	0.3	0.3	0.1	0
AgE07	107852	123972	AgE07_g009_t01	+	5459	7	serine threonine-protein kinase pelle	PgB03_g172_t06,PgE012_g003_t10,PgE083_g002_t03	MSTRG.13371.1,MSTRG.13371.1	10.7	12.2	1.8	0.2	1.8	1.4	0.5	0.4	0.9	1.3	0.8	1.1	1.5	1.5	2.4	1.5	1.9	1.3	1.4	1.8	2.6	1.9	17.7	10.1	6.6
AgE07	125012	128827	AgE07_g010_t04	-	3422	2	hypothetical protein			8.5	13.5	2.2	0	0.7	0.3	0.2	0.2	0	0.1	0.4	0.5	0.4	0.9	0.5	0.6	0.1	0.1	0	0	0	0	0	0	0
AgE07	129077	141835	AgE07_g011_t02	-	4604	8	Serine/threonine-protein phosphatase pph-6	PgE215_g001_t01,PgE014_g005_t01,PgE008_g005_t01,PgE043_g004_t02,PgE056_g002_t02,PgE094_g001_t03,PgE088_g001_t01,PgE204_g001_t01	MSTRG.23250.2,MSTRG.21515.4,MSTRG.21515.4,MSTRG.22900.4,MSTRG.22337.1,MSTRG.7423.3,MSTRG.21870.4,MSTRG.21870.4,MSTRG.23946.1,MSTRG.13356.2,MSTRG.18840.1	49.2	61.6	6.4	0.3	3	0.7	0.1	0.1	0.2	0.1	2.7	3.4	2.8	2.9	7.3	5.9	2.8	0.1	0	0.1	0.2	0	0.2	0	0
AgE07	143840	163104	AgE07_g012_t01	-	7658	11	Vascular endothelial growth factor receptor 3	PgE161_g001_t02,PgE215_g003_t02,PgB37_g005_t03,PgE056_g003_t06,PgE088_g002_t01,PgE277_g001_t02,PgE063_g004_t02,PgE002_g006_t01,PgE001_g002_t01	MSTRG.20759.5,MSTRG.22671.1,MSTRG.22671.1,MSTRG.23796.1,MSTRG.7427.1,MSTRG.21580.2,MSTRG.23400.4,MSTRG.23125.4,MSTRG.22672.1,MSTRG.16870.5	7.5	5.6	0.8	0.1	1.5	20.1	16.9	17.3	3	3.8	22.6	19.3	18	22.4	40.4	41	15.6	1.9	0.7	0.7	0.6	0.5	0.8	0.4	0
AgE07	193136	197152	AgE07_g013_t01	.	4017	1	hypothetical protein			15.1	71.6	19.3	0.1	2.5	0	0	0	0.1	0.1	0.4	0.7	0.9	0.5	1.2	0.5	0.1	0	0	0	0	0	0.2	0	0
AgE07	197222	214920	AgE07_g014_t02	+	6426	11	Protein spinster	PgE083_g001_t09,PgE167_g002_t01	MSTRG.2306.1,MSTRG.20604.1	12.7	48.6	4.2	0	1	0	0	0	0	0	0.2	0.5	0.2	0.3	0.4	0.2	0	0	0	0	0	0	0.1	0	0
AgE07	210281	229006	AgE07_g015_t01	-	15119	8	par-1 -like family member	PgE003_g004_t02,PgE088_g002_t01,PgE277_g001_t02	MSTRG.22172.1,MSTRG.22172.1,MSTRG.23347.1,MSTRG.23347.1,MSTRG.23062.1,MSTRG.23061.1,MSTRG.21887.1,MSTRG.21887.1,MSTRG.22069.3	13.8	39	3.4	0.1	0.7	0.3	0.1	0.1	0.1	0.1	0.8	1.2	2.8	1.1	2.3	1.9	3.2	0.2	0	0	0.1	0	0.1	0	0
AgE07	233646	261134	AgE07_g016_t02	-	2478	18	protein-like protein 4	PgE093_g001_t03,PgB03_g171_t01,PgE269_g001_t02	MSTRG.22964.4,MSTRG.22964.4,MSTRG.21159.4,MSTRG.21159.4,MSTRG.21159.4,MSTRG.21747.2	16.8	2.4	0.8	0	5.6	39.8	12.5	14.9	1.5	2	6.7	5.4	3.2	8.5	20.4	17.9	7.2	1.7	0.9	0.5	0.4	0	0.3	0.1	0
AgE07	259111	267176	AgE07_g017_t01	+	4220	4	protein-like protein 4	PgE093_g001_t03	MSTRG.22964.4	2.2	0.5	0.1	0	0.5	3.7	1.2	1.1	0.1	0.1	0.6	0.4	0.3	0.5	1.3	1.2	0.8	0.1	0.1	0	0	0	0	0	0
AgE07	275528	275843	AgE07_g018_t01	.	316	1	hypothetical protein			0.7	0.8	0	0	0	0.4	0	0	0	0.1	2.9	2	5.9	1.9	24.8	10.7	4.1	1.8	1.9	0.4	1	0	0.1	0	0
AgE07	275944	287910	AgE07_g019_t01	-	8370	3	protein-like protein 4			3.8	9	1	0	0.3	0	0	0	0	0	0.1	0.1	0	0	0.1	0	0.1	0	0	0	0	0	0	0	0
AgE07	278063	287974	AgE07_g020_t04	+	5517	3	Protein DDI1 2	PgE100_g003_t03	MSTRG.20410.7	4.5	11.8	1.3	0	0.4	0.1	0	0	0	0	0.1	0.2	0.3	0.2	0.2	0.1	0.1	0	0	0	0	0	0.1	0	0.1
AgE07	288831	307760	AgE07_g021_t04	-	2805	5	serine threonine-protein kinase smg-1			4.9	3.9	1.3	0	0.7	6.4	3.3	3.4	1.2	1.2	4.1	2.7	3.8	4.4	15	18.4	19.1	3.1	0.5	0.5	0.7	0	0.5	0.1	0.1
AgE08	2475	7822	AgE08_g001_t01	-	1305	4	abhydrolase domain-containing protein	PgE166_g001_t05	MSTRG.20910.28	3	8	1.3	0.1	0.2	0.1	0.2	0.2	0	0.1	0.3	0.3	0.1	0.5	0.2	0.1	0.1	0	0	0	0	0	0	0	0
AgE08	4880	5327	AgE08_g002_t01	.	448	1	hypothetical protein			8.5	11.4	0.7	0	0	0.1	0.1	0.4	0	0	0.4	0	0	0.1	0.1	0	0	0	0	0	0	0	0.1	0	0
AgE08	9331	11160	AgE08_g003_t01	-	818	2	hypothetical protein			4.6	0.2	0.3	0	0.3	0.8	0.6	0.7	0.3	0	0.1	0	0.1	0.3	0.1	0	0	0.1	0	0	0	0	0.1	0	0
AgE08	14909	21731	AgE08_g004_t01	+	2485	6	hypothetical protein	PgE505_g001_t02,PgE064_g001_t01	MSTRG.21301.4	3.2	10.7	1.5	0.1	0.4	0.4	0.9	0.9	0.2	1.3	10	8.1	6.4	5.8	5.1	2.2	2.3	0	0	0	0	0	0.1	0.1	0
AgE08	29247	35313	AgE08_g005_t02	-	611	5	hypothetical protein	PgE078_g004_t01	MSTRG.17387.1,MSTRG.17407.2	31.5	71.3	8.4	0.6	1.3	0	0	0	0	0	0.2	0.9	1.2	1	0.8	0.8	0.1	0.2	0	0	0	0	0.1	0	0
AgE08	39649	40089	AgE08_g006_t01	.	441	1	hypothetical protein			3.4	18.1	4.8	0.1	0.7	0	0	0	0	0	0.3	0.1	0.1	0.3	0.5	0	0.5	0.1	0	0	0	0	0	0	0
AgE08	46750	61005	AgE08_g007_t05	-	3823	13	hypothetical protein	PgE140_g001_t04,PgE042_g004_t02	MSTRG.22572.1,MSTRG.22572.1,MSTRG.22574.6,MSTRG.22574.6,MSTRG.22574.6,MSTRG.22573.1,MSTRG.22576.1,MSTRG.22575.1,MSTRG.22843.1,MSTRG.22842.3	19.7	21.8	2.5	0.2	3.5	39.4	43.1	40.4	11.7	15.5	39.9	33.5	18.5	24.8	26.7	26.6	10.9	2	1.7	1.2	1.2	0.5	1.8	0.8	0
AgE08	61061	70492	AgE08_g008_t03	+	5014	5	Peptidyl-prolyl cis-trans isomerase 7, partial	PgE064_g002_t02	MSTRG.22178.1,MSTRG.21630.5,MSTRG.22682.1,MSTRG.22680.1	40.5	28.9	3.1	0.2	1.1	0.3	0.2	0.1	0	0.2	1.1	1	1.4	1.3	3.6	2.1	0.6	0.5	0.4	0.4	0.5	0.3	0.2	0.1	0.3
AgE08	81882	87444	AgE08_g009_t12	-	2782	6	Polyadenylate-binding protein 2	PgE164_g002_t03,PgE082_g001_t01	MSTRG.22880.1,MSTRG.20533.4	22.6	5.8	1	0	3.2	16.9	14.9	13.8	4.5	8.3	59.5	51.4	26.3	35.8	16.8	8.8	3.2	0.8	0.3	0.3	0.6	0	1.5	0.4	0
AgE08	89871	96112	AgE08_g010_t02	-	1170	5	hypothetical protein		MSTRG.23469.1	20.6	39.7	2.5	0.1	1.8	0.1	0	0	0	0.1	0.4	1	0.9	0.4	1.9	1.3	1	0	0	0	0	0	0.3	0	0.1
AgE08	99676	112815	AgE08_g011_t02	+	3877	10	Protein UBASH3A	PgE022_g005_t04	MSTRG.19727.1,MSTRG.22756.1,MSTRG.19728.1,MSTRG.18546.2	9.6	20.6	2.2	0	0.5	1.2	3.1	3	1.7	4.2	26.4	17.4	10.2	22.4	13.6	8.3	2	0.5	0.1	0.1	0.3	0	1.1	0.1	0
AgE08	114407	120734	AgE08_g012_t05	+	2266	5	hypothetical protein			2.9	12.7	0.9	0	0.2	0	0	0	0	0	0.2	0.3	0.1	0.3	0.3	0.1	0.1	0	0	0	0	0	0	0	0
AgE08	126730	128504	AgE08_g013_t01	-	1506	3	Structural maintenance of chromosomes protein 3			62.6	61.4	6.7	0.5	4.3	11.3	14	14.4	3.2	6.3	20.6	17.4	33	17.8	23.9	23.4	14.3	1.2	0.3	0.4	0.5	0	1.2	0.6	0.1
AgE08	166388	179479	AgE08_g014_t02	-	3612	8	ke2 family protein			9.4	3.9	0.5	0	2.7	7.2	6.2	6.2	1.5	5.3	28.1	22	17.3	23.9	22.3	18.5	9.1	1.7	0.3	0.5	0.4	0	1	0.2	0
AgE08	180066	182146	AgE08_g015_t01	+	1065	3	Phosphatidylinositol 4-kinase alpha			13.4	8.5	6.7	2.9	6.2	9.6	12.3	12.6	5.4	2.3	3.1	4.1	5.9	7.4	14.1	11.7	6	8.6	6.4	5.3	3.9	4.9	2.4	2.1	1.9
AgE08	185748	199842	AgE08_g016_t05	-	4285	11	f-box domain containing protein	PgE199_g001_t01,PgE238_g001_t01	MSTRG.18395.2,MSTRG.23569.1,MSTRG.18396.1	30.5	154.9	27.9	0.3	4	0.1	0.1	0	0.2	0.1	0.4	0.6	0.6	0.8	1	0.6	0.4	0	0	0	0	0	0.3	0	0.1
AgE08	200077	208262	AgE08_g017_t05	-	2830	6	hypothetical protein	PgE264_g001_t01	MSTRG.23159.1,MSTRG.22962.1,MSTRG.22207.1,MSTRG.23077.1	4	13	1	0	0.2	0	0	0	0	0	0.1	0.1	0.1	0.1	0.2	0	0.1	0	0	0	0	0	0	0	0
AgE08	208828	212151	AgE08_g018_t01	-	612	4	telomerase-binding protein est1a			13.7	10.5	2.3	1	1	23.6	11.9	11	2.9	1.8	2.9	1.5	4.1	6	5.4	7.9	9.9	8.1	9.4	7.2	6.7	0	1.6	0.3	1.3
AgE08	216241	216960	AgE08_g019_t01	+	720	1	hypothetical protein	PgE295_g001_t02	MSTRG.23159.1	0	0	0	0	0	0	0	0	0	0	0	0	0	0	0	0	0	0	0.1	0	0	0	0	0	0
AgE08	221062	228307	AgE08_g020_t01	-	4923	2	hypothetical protein			1.8	5.4	0.8	0	0.1	0	0	0	0	0	0.1	0	0.2	0.1	0	0.1	0.1	0	0	0	0	0	0	0	0
AgE08	229308	243535	AgE08_g021_t03	-	8493	10	LINE-1 reverse transcriptase		MSTRG.23085.2,MSTRG.23085.2,MSTRG.5628.2,MSTRG.5628.2,MSTRG.5629.1,MSTRG.5629.1,MSTRG.3345.1,MSTRG.3345.1,MSTRG.21598.1,MSTRG.19727.1,MSTRG.20806.1,MSTRG.21698.1,MSTRG.23358.3,MSTRG.23358.3,MSTRG.4171.1,MSTRG.23333.3,MSTRG.3363.1,MSTRG.20060.1	13.2	45	6.5	0.3	1.4	0.1	0.1	0.1	0.3	0.2	0.3	0.4	0.5	0.3	0.4	0.5	1.4	0.3	0.3	0.9	0.4	0.4	0.3	0.2	0.2
AgE08	244346	263748	AgE08_g022_t01	-	4271	14	fas-associated factor 1	PgE008_g001_t02	MSTRG.20930.1,MSTRG.20931.1	27	77.4	11.9	0.2	5.6	13.1	8.7	7.7	2.2	4.5	31	34.3	40	36.5	26.1	29.3	15	2.4	0.5	0.6	0.6	0	1.4	0.4	0
AgE08	267948	279838	AgE08_g023_t03	-	1196	4	dtdp-4-dehydrorhamnose -epimerase			5.3	5.3	0.4	0.1	0.5	9.5	4.6	4.7	0.3	0.8	2.4	2.4	2.6	5	14.1	15.3	9	1	0.9	0.5	0.5	0	0.3	0	0
AgE08	290607	300031	AgE08_g024_t07	+	2901	6	Hemicentin-1			8.1	14.3	0.8	0	1.6	9	5.5	5.2	0.7	0.3	1.3	2.5	2.8	3.6	12.7	19.8	19	3.2	1.6	1.8	1.5	0.6	0.3	0.2	0
AgE09	7639	17172	AgE09_g001_t01	-	942	8	Tyrosine-protein phosphatase non-receptor type 22	PgE229_g002_t04	MSTRG.20010.1,MSTRG.1831.1	22.9	65.9	6.5	0.4	2.6	0.1	0.5	0.7	0.5	1	3.6	3.9	1.7	4.4	2.3	0.9	0.2	0	0	0	0	0	0.1	0	0
AgE09	24525	31675	AgE09_g002_t06	-	1493	6	Serine/threonine-protein phosphatase PP1	PgE043_g004_t02,PgE056_g002_t02,PgE094_g001_t03,PgE215_g001_t01,PgE088_g001_t01,PgE014_g005_t01,PgE008_g005_t01,PgE204_g001_t01	MSTRG.21870.4,MSTRG.21870.4,MSTRG.22900.4,MSTRG.23250.2,MSTRG.23946.1,MSTRG.22337.1,MSTRG.21515.4,MSTRG.21515.4,MSTRG.13356.2,MSTRG.13356.2,MSTRG.13356.2,MSTRG.7423.3,MSTRG.18840.1	29.9	60.6	5.9	0.3	3.7	0.9	0.6	0.7	0	0.4	2.5	2.8	4.6	3.9	4.9	3.4	2.3	0.3	0	0	0.1	0	0.1	0	0
AgE09	33119	58127	AgE09_g003_t02	-	4766	19	Phospholipase A-2-activating protein	PgE062_g001_t02,PgE043_g005_t01	MSTRG.23518.1,MSTRG.23518.1,MSTRG.23518.1,MSTRG.23590.11,MSTRG.23590.11	48	8.7	1.7	0.2	7.5	92.6	57.3	58.6	8	2.1	30.2	19.1	15.7	21	23.5	19.9	8.1	2.2	0.5	0.6	0.6	0.4	1.2	0.8	0
AgE09	59088	61492	AgE09_g004_t01	+	1174	2	major antigen			0.5	0.8	0.2	0	0	0.2	0	0	0	0	0	0	0.2	0	0	0	0	0	0	0.1	0	0	0	0	0.3
AgE09	87684	99341	AgE09_g005_t01	+	2417	13	putative beta-mannosidase			1.7	0.7	1	0.5	0.2	0.8	0.8	0.7	1.5	1.1	0.9	0.4	0.4	1.4	1.9	2.9	1.6	5.6	4	3	4.3	1.4	2	0.4	2.4
AgE09	100738	102815	AgE09_g006_t01	+	763	4	Beta-mannosidase			0.8	0.9	0.5	0.1	0.4	0.3	0.5	0.6	1.9	1.8	0.9	1	0.8	1.4	1.9	3.5	4.3	5.1	4.1	2.5	2.9	2.3	2.8	0.7	2.8
AgE09	102920	106154	AgE09_g007_t02	-	1243	4	26S proteasome non-ATPase regulatory subunit 8			1	1.5	1.5	0.3	0.8	0.5	0.6	0.6	2.1	1.4	6.6	3.2	2.2	10.1	9.3	12.7	4.1	16.9	10.7	5.6	6.9	1.4	8.2	3.7	4.9
AgE09	127938	146989	AgE09_g008_t03	+	4313	8	Serine/threonine-protein kinase PLK1	PgE017_g003_t01,PgE015_g003_t01	MSTRG.22069.3,MSTRG.21708.4	3	2.2	0.1	0	0.4	4.3	5.4	5.3	3	4.8	34.8	15.3	8.2	13.3	10.2	5.1	0.9	0.3	0	0.1	0.1	0	0.5	0.1	0
AgE09	132446	133045	AgE09_g009_t01	.	600	1	Serine/threonine-protein kinase PLK1			2	0.9	0	0	0	0.6	0	0.1	0	0.4	0.1	0	0	0.6	0	0.3	0.8	0	0	0	0	0	0	0	0
AgE09	149367	174669	AgE09_g010_t01	+	5200	20	Disintegrin and metalloproteinase domain-containing protein 10		MSTRG.5759.7,MSTRG.21605.16,MSTRG.21605.16,MSTRG.21605.16,MSTRG.5760.1,MSTRG.21606.1,MSTRG.23979.2	15.6	65.2	5.5	0.3	1.8	0.1	0.2	0.2	0.1	0.1	0.6	0.5	0.4	0.4	1.2	1.2	0.8	0.1	0	0	0	0	0.2	0	0
AgE09	162679	181112	AgE09_g011_t01	-	12256	4	Glutamate NMDA receptor-associated protein 1			7.3	17.5	1.4	0.1	0.4	0.1	0.1	0.1	0	0	0.4	0.4	0.4	0.2	0.5	0.4	0.1	0	0	0	0	0	0.1	0	0
AgE09	181306	187297	AgE09_g012_t01	-	464	4	Glutamate NMDA receptor-associated protein 1	PgE017_g001_t01,PgE015_g001_t01	MSTRG.22698.1,MSTRG.17407.2,MSTRG.22356.1	16.7	55	6.6	0.1	1.3	0	0	0	0	0	0.4	0.1	0	0.5	1.5	0.5	0	0	0	0	0	0	0.2	0	0
AgE09	189133	201292	AgE09_g013_t04	-	1874	7	hypothetical protein			22.4	49.5	4.8	0.2	1.7	0.1	0.1	0	0	0.1	0.1	0	0.2	0.1	0.1	0.1	0.3	0	0	0	0	0	0.3	0	0.2
AgE09	207301	211387	AgE09_g014_t01	+	414	3	hypothetical protein			3.6	6.3	0.6	0.2	0.8	0.4	0	0.1	0.3	0.8	0.7	0.4	0.1	0.9	1.2	1.7	0.9	2.5	0.9	1.4	1.6	0	0.2	0.2	0.3
AgE09	215139	221397	AgE09_g015_t01	+	1261	7	nuclear migration and anchoring protein unc-84	PgE041_g004_t02	MSTRG.23132.1	14.5	3.9	1	0	2.7	37.4	23.3	24.6	7.7	6.4	29.8	27	21	38.1	30.4	29.7	15.6	3	1.1	0.9	0.9	0	1	0.2	0
AgE09	222074	243503	AgE09_g016_t01	+	8049	17	protein ubash3a-like protein	PgE041_g001_t02,PgE349_g001_t01,PgE022_g005_t04,PgE041_g003_t03	MSTRG.24093.1,MSTRG.18546.2,MSTRG.23945.2,MSTRG.19727.1	36	59.4	7.1	0.3	2.6	0.1	0.1	0	0	0	0.2	0.2	0.1	0.2	0.4	0.2	0.2	0	0	0	0	0	0.2	0	0.1
AgE09	240862	246636	AgE09_g017_t01	-	666	5	megakaryocyte-associated tyrosine-protein kinase	PgB18_g049_t02	MSTRG.18387.3	30.4	37	2.6	0	0.2	0	0	0	0	0	0.1	0.4	0.2	0.6	0.5	0.3	0	0	0	0	0	0	0	0	0
AgE09	254226	255236	AgE09_g018_t01	+	231	2	hypothetical protein			2.7	1.7	0.4	0	0	0	0	0	0	0	0	0.2	0	0.7	0.2	0.5	0.2	0	0	0	0	0	0	0	0
AgE09	271355	275935	AgE09_g019_t06	-	947	5	ALG-6	PgE262_g002_t04	MSTRG.23710.1	22.4	4.2	1.2	0	4.7	51.3	27.5	29.3	5.5	3	12.2	13.7	19.3	32	12.6	15.9	16	2.7	1	1.2	0.9	3.7	0.5	0.3	0
AgE09	280786	285135	AgE09_g020_t06	+	1227	6	atp-dependent helicase brm	PgE113_g002_t06		17.8	6.5	1.7	0.2	7.6	17.2	16.7	14.7	2.9	6.3	34.8	35.7	34.5	30	31.3	28.1	14.5	2	0.7	0.6	0.9	1.4	2.1	1.2	0
AgE10	2979	10531	AgE10_g001_t02	+	650	5	dna-directed rna polymerase ii subunit rpb9	PgE169_g001_t04	MSTRG.22208.1,MSTRG.19345.2,MSTRG.24256.2	80.1	16.4	2.8	0.3	23.7	64	84.5	73.9	10.5	17.9	125.2	179.2	293.8	112.8	109.2	83.8	118.2	7.9	2.7	2.3	3.9	0	6.2	2.5	0.4
AgE10	12153	12442	AgE10_g002_t01	+	290	1	Bromodomain and WD repeat-containing protein 1			8.8	16.3	3.2	0.5	1.5	8	5.1	5.7	0.8	1.3	0.7	0.4	1.5	3.6	3.3	4	3.6	3.1	3.5	3.6	2.4	6	0.4	0.2	0.7
AgE10	16184	63270	AgE10_g003_t13	+	4646	21	MutS protein 5, partial	PgE269_g001_t02,PgE201_g001_t04,PgE093_g001_t03	MSTRG.21747.2,MSTRG.22964.4	11.4	1.2	0.4	0.1	2.3	15.1	5.4	6.4	0.6	0.6	2.6	3.4	3.8	4.1	6.1	8.7	5.2	1.2	0.6	0.5	0.5	0	0.3	0.2	0.1
AgE10	76690	84964	AgE10_g004_t01	+	2972	6	hypothetical protein		MSTRG.21999.4,MSTRG.21998.5,MSTRG.22875.3,MSTRG.22875.3	30.1	94.3	17.8	0.6	5.9	0.8	0.7	0.6	0.3	0	0.5	0.2	0.5	0.4	3.6	1.5	1.1	0.3	0	0	0.1	0	0.5	0	0.1
AgE10	94266	95646	AgE10_g005_t01	.	1381	1	Craniofacial development protein 2, partial			6.2	3.7	0.9	0	0	0.1	0.1	0.1	0	0.1	0.3	0.7	0.5	0.9	0.3	0.2	0.2	0.4	0.3	0.6	0.4	0	0.1	0.1	0.1
AgE10	108380	137809	AgE10_g006_t11	-	6816	20	tudor domain containing protein	PgE006_g008_t01,PgE006_g007_t01	MSTRG.7997.22,MSTRG.7997.22	74.9	75.6	8.5	0.4	5.9	1.8	1	0.8	0	0.1	0.5	0.5	0.5	0.9	1.4	0.6	0.3	0.1	0	0.1	0.1	0	0.2	0	0.1
AgE10	139084	145590	AgE10_g007_t01	-	1690	5	ras-related protein rab-10	PgE458_g001_t01,PgE123_g002_t01,PgE409_g001_t01	MSTRG.21636.1,MSTRG.22016.3,MSTRG.23234.1,MSTRG.21616.1,MSTRG.23892.1	14.2	1.5	0.3	0.1	3.6	10.8	17.9	16.3	10.4	41.4	270.2	259.3	239.2	244.8	148.4	114.9	57.2	7.5	1	1.9	2.9	0	7.3	1.3	0.1
AgE10	140744	144366	AgE10_g008_t01	+	2512	2	Ras-related protein Rab-10		MSTRG.21636.1	5.5	0.8	0.1	0	1	2.6	3.5	3.5	1.7	3.4	19.3	23.1	20.2	36	20.4	12.5	8.2	1	0.3	0.3	0.3	0	1.3	0.3	0
AgE10	148380	172870	AgE10_g009_t02	-	7422	15	hypothetical protein	PgE070_g002_t03	MSTRG.18546.2,MSTRG.13357.2,MSTRG.23123.1,MSTRG.21326.1,MSTRG.22858.1,MSTRG.21318.1	10.3	18.1	1.4	0	0.2	0	0	0	0	0	0.1	0.2	0.2	0.4	0.8	0.5	0.3	0.1	0.1	0.3	0.3	0	0	0	0
AgE10	178532	190321	AgE10_g010_t02	+	2078	11	Lamin-1	PgE188_g001_t03,PgB34_g005_t01,PgB34_g005_t01,PgB34_g006_t01	MSTRG.21940.4,MSTRG.22743.10,MSTRG.22743.10,MSTRG.22470.1,MSTRG.22470.1,MSTRG.24346.2,MSTRG.22744.1	28.4	8.9	1.9	0.2	11.4	49.5	40.8	44.6	28.3	30.4	201.2	172.6	196.7	203.5	91.8	106.6	53.9	7.2	1.9	2	3	0.8	6.6	3.7	0.1
AgE10	190552	191724	AgE10_g011_t01	.	1173	1	mog interacting and ectopic p-granules protein 1			0.8	1.8	0.1	0	0	0.4	0	0.2	0	0	0.3	0.2	0.3	0.3	0.4	0.2	0.1	0	0	0	0	0	0	0	0
AgE10	202617	208258	AgE10_g012_t01	-	905	6	hypothetical protein			56.5	34.3	5.6	0.3	9.6	74.6	57.2	60.4	4.3	8.8	16	20.4	45.5	33.4	10.4	5.5	1.1	0.2	0	0.8	0.2	0	0.2	0.1	0
AgE10	208858	211560	AgE10_g013_t01	+	856	3	abundant larval transcript-2 protein			3	4.6	7.5	56.3	9.6	0.2	0.3	0.5	1.4	2.3	0.1	0.1	0	0.1	0.4	0.1	0.1	0	0	0	0.1	0	1	0	0.1
AgE10	216177	218933	AgE10_g014_t01	-	484	4	abundant larval transcript-2 protein			0.2	0.2	12.9	166.2	25.3	0.1	0.5	0.1	3.6	8.4	0	0	0.2	0.1	0.2	0.1	0.1	0	0	0	0	0	3.3	0	0.1
AgE11	2706	48759	AgE11_g001_t01	+	42914	4	Tyrosine-protein kinase Fps85D, partial	PgE036_g001_t03,PgE036_g001_t03	MSTRG.17934.6,MSTRG.17934.6,MSTRG.21252.1,MSTRG.21252.1,MSTRG.22383.1,MSTRG.22383.1,MSTRG.22868.1,MSTRG.22868.1	6.5	10.9	1.1	0	0.3	0.1	0.3	0.3	0	0	0.3	0.3	0.3	0.3	0.4	0.3	0.2	0	0	0	0	0	0	0	0
AgE11	6443	48721	AgE11_g002_t03	-	5335	19	Tyrosine-protein kinase Fes/Fps	PgB25_g020_t03,PgE036_g001_t03	MSTRG.21252.1,MSTRG.22383.1,MSTRG.17934.6,MSTRG.17934.6,MSTRG.17934.6,MSTRG.21254.2,MSTRG.11671.1,MSTRG.22868.1,MSTRG.22868.1,MSTRG.21255.8,MSTRG.21255.8,MSTRG.21255.8,MSTRG.17935.1,MSTRG.4189.1,MSTRG.23883.1	8.4	30	2.2	0.1	1	0.1	0.2	0.2	0.1	0	0.6	0.6	0.8	0.7	0.8	0.3	0.3	0	0	0	0	0	0.1	0	0
AgE11	51287	83061	AgE11_g003_t08	+	2939	12	hypothetical protein	PgB25_g021_t02	MSTRG.22192.3	73.2	120.1	14.4	0.8	3.5	0.1	0.1	0.1	0	0.1	0.4	0.9	0.2	0.4	0.6	0.4	0.2	0	0	0	0.1	0	0.3	0	0.1
AgE11	86702	102909	AgE11_g004_t04	+	5305	6	Ras-related C3 botulinum toxin substrate 1	PgE104_g001_t02,PgE106_g002_t02,PgE023_g004_t05	MSTRG.24117.1,MSTRG.24117.1,MSTRG.2298.1,MSTRG.23767.1	8.8	14.9	1.9	0	0.6	0.1	0.1	0	0	0	0.5	0.4	0.7	0.5	1	0.5	0.2	0	0	0	0	0	0.1	0	0
AgE11	97093	111810	AgE11_g005_t01	-	10489	4	Ras-related C3 botulinum toxin substrate 1		MSTRG.21616.1,MSTRG.23892.1,MSTRG.22016.3,MSTRG.21636.1,MSTRG.23234.1	4.4	5.7	0.9	0	0.1	0.2	0.1	0.1	0	0	0.3	0.5	0.2	0.4	0.8	0.4	0.2	0	0	0	0	0.2	0	0	0
AgE11	114301	132910	AgE11_g006_t01	+	2591	10	26S proteasome non-ATPase regulatory subunit 4	PgE045_g002_t05	MSTRG.23886.4,MSTRG.23886.4	35.8	184.5	66.9	1.1	5.7	1.6	1.1	1.1	0.6	0.8	4.4	5.3	4.1	4.5	3.6	2.6	0.6	0.1	0	0	0.2	0	0.6	0	0.1
AgE11	133249	141383	AgE11_g007_t02	-	5896	4	hypothetical protein			2.5	3	0.3	0	0.1	0.2	0.3	0.3	0	0	0.4	0.3	0.3	0.6	0.7	0.3	0.2	0.1	0	0	0	0	0	0	0
AgE11	142618	152486	AgE11_g008_t06	-	2082	8	Ubiquitin-conjugating enzyme E2 J2	PgE045_g001_t01,PgE111_g001_t01,PgE109_g003_t01,PgE109_g002_t01,PgE030_g001_t02	MSTRG.17394.1,MSTRG.8297.2,MSTRG.22259.5,MSTRG.13376.1,MSTRG.18751.1,MSTRG.1696.1,MSTRG.7436.1,MSTRG.21511.1	34	57.5	23.5	1.3	4.1	10.5	27.1	22.2	4.6	14.9	62.3	109.4	122.7	54.3	30.8	18.2	17.6	3.7	3.1	2.5	1.7	0	2.4	0.7	1.8
AgE11	162951	166287	AgE11_g009_t01	-	1292	5	Alpha-crystallin B chain			4	2.1	0.7	0.1	0	0	0	0.1	0.3	0	0	0.2	0.3	0.3	0.5	0.1	0.1	0	0.1	0.1	0	0	0.1	0.1	0.8
AgE11	173518	194163	AgE11_g010_t05	+	3401	11	Cytoplasmic polyadenylation element-binding protein 3	PgE096_g001_t04,PgE203_g001_t02,PgB41X_g004_t04	MSTRG.23108.1,MSTRG.23046.2,MSTRG.18758.3,MSTRG.18758.3	18.5	2	0.9	0.1	2.5	62.4	44.1	41.3	4.7	3.9	11.5	12.3	16.9	13.7	21.3	11.7	4.7	0.8	0.2	0.3	0.5	0	1	0.6	0
AgE11	171094	171748	AgE11_g011_t01	.	655	1	hypothetical protein			1.6	1.2	0.4	0	0	0.1	0	0	0	0	0	0.2	0.4	0.2	0.2	0.2	0.2	0	0	0	0.2	0	0	0	0
AgE11	196065	196470	AgE11_g012_t01	.	406	1	hypothetical protein			0.3	0	0	0	0	0	0	0	0	0	0.4	0	0	0.4	0.2	0.1	0.1	0.2	0	0	0	0	0	0	0
AgE12	374	11656	AgE12_g001_t02	+	3763	5	hypothetical protein	PgB44_g001_t11	MSTRG.21073.4	15	28.1	2.3	0	0.2	0.9	0.5	0.2	0	0	0.1	0.3	0.2	0.3	0.8	0.8	0.7	0.1	0	0	0.1	0	0	0	0
AgE12	23970	36472	AgE12_g002_t11	+	3402	13	Serine/threonine-protein phosphatase PP1, partial	PgE094_g001_t03,PgE043_g004_t02,PgE056_g002_t02,PgE215_g001_t01,PgE088_g001_t01,PgE204_g001_t01,PgE014_g005_t01,PgE008_g005_t01	MSTRG.7423.3,MSTRG.7423.3,MSTRG.7423.3,MSTRG.18841.1,MSTRG.18840.1,MSTRG.18840.1,MSTRG.22337.1,MSTRG.22900.4,MSTRG.21515.4,MSTRG.21515.4,MSTRG.23250.2,MSTRG.21870.4,MSTRG.21870.4,MSTRG.23946.1,MSTRG.13356.2	35.6	205.8	56.6	1.3	5.4	0.7	0.9	0.6	0.1	0.1	0.6	0.9	1.2	1.7	3.5	4.4	3.3	0.6	0.1	0.1	0.1	0	0.7	0	0.1
AgE12	84344	99935	AgE12_g003_t14	-	5588	11	Tyrosine-protein kinase Fer	PgB37_g005_t03,PgE056_g003_t06,PgE088_g002_t01,PgE277_g001_t02,PgB25_g019_t01,PgE063_g004_t02,PgE002_g006_t01,PgE001_g002_t01,PgE080_g003_t01,PgE222_g001_t02,PgE033_g004_t01,PgE033_g004_t01	MSTRG.7427.1,MSTRG.21580.2,MSTRG.23400.4,MSTRG.23443.1,MSTRG.19994.2,MSTRG.19994.2,MSTRG.23125.4,MSTRG.23796.1,MSTRG.17933.1,MSTRG.18317.15,MSTRG.19573.8,MSTRG.21090.8,MSTRG.23481.2,MSTRG.16581.1,MSTRG.21941.1,MSTRG.22069.3,MSTRG.20759.5,MSTRG.22241.1,MSTRG.8296.2,MSTRG.16870.5	15.7	97.6	11.8	0.3	2	0.6	0.6	0.5	0.1	0	0.3	0.4	1	0.9	5.8	5.1	7.1	2.2	0.3	0.4	0.3	0	0.2	0	0
AgE12	179014	189824	AgE12_g004_t18	-	2489	7	spindle- and centromere-associated protein			14.2	33.2	3.8	0.1	0.6	5.1	3.1	3.2	0.6	0.1	1.7	2.7	1.8	2.9	4.6	4.5	3.4	0.6	0.2	0.3	0.4	0.7	0.7	1.2	0.1
AgE12	155140	167541	AgE12_g005_t01	.	12402	1	Retrotransposable element Tf2 155 kDa protein type 1	PgE295_g001_t02,PgE011_g005_t01	MSTRG.18626.6,MSTRG.21881.2,MSTRG.21881.2,MSTRG.21606.1,MSTRG.21606.1,MSTRG.23159.1,MSTRG.22256.2,MSTRG.22256.2,MSTRG.22257.1,MSTRG.22257.1	10.3	17.6	1.3	0.1	0.6	1.2	0.6	0.7	0.1	0.1	0.6	0.7	0.4	0.6	2	2	1.1	0.3	0.2	0.2	0.1	0	0.1	0	0.1
AgE12	196488	200853	AgE12_g006_t04	+	1752	6	Proteasome activator complex subunit 4, partial	PgE176_g001_t01,PgE003_g001_t05	MSTRG.21621.1,MSTRG.21057.1,MSTRG.524.3	12.3	77.8	7.2	0.2	1.5	0.4	0.3	0.1	0.3	0	0.4	0.2	0.1	0.3	0.9	0.8	0.9	0.2	0.2	0.1	0.4	0	0.1	0	0
AgE13	36142	38869	AgE13_g001_t04	-	920	5	hypothetical protein			37.2	9	3	0.3	6.9	26.1	14.6	13.2	2.9	0.4	2.4	4.3	7.2	20.8	22.6	20.5	16	12	3.5	2.1	5.1	0	0.1	0.1	0.2
AgE13	1561	4797	AgE13_g002_t01	-	627	4	hypothetical protein			56	19.5	5.8	0.3	11.3	30.1	15.4	16	4.9	1.5	11.6	26.8	35.7	52.4	83.5	92	83.7	28.6	6.8	5.1	8.3	2.8	0.9	0.1	0
AgE13	28018	32526	AgE13_g003_t03	-	928	6	hypothetical protein			53.3	6.7	5.6	1.8	13.5	77.6	48	53.2	10.1	1.3	6.7	9.3	13.4	28.1	29.5	25.5	15.1	18.9	6.9	5.9	6.4	5.6	0.9	0.7	0.7
AgE13	51469	58772	AgE13_g004_t01	-	2246	5	hypothetical protein		MSTRG.23469.1	9.5	20.6	1.5	0	0.7	0	0	0	0	0	0.1	0.2	0.7	0.3	0.9	0.6	0.3	0	0	0	0	0	0.1	0	0
AgE13	79864	95269	AgE13_g005_t05	-	4110	11	Nose resistant to fluoxetine protein 6	PgE022_g002_t06,PgE362_g001_t01	MSTRG.22184.1,MSTRG.19922.1,MSTRG.22185.1	21.6	5.3	1	0.1	3	46.1	43.8	41.7	8.3	5.3	54.8	58.8	54	63.2	91.3	128.9	86.4	8.4	0.8	1.7	1.3	0.4	1.7	0.6	0
AgE13	98384	125158	AgE13_g006_t06	-	3145	15	Transient-receptor-potential-like protein	PgE107_g001_t03,PgE022_g001_t06	MSTRG.21562.4,MSTRG.21425.12,MSTRG.24007.2,MSTRG.24007.2,MSTRG.24007.2	22.7	81.6	7.2	0.3	1.8	0	0	0	0.1	0	0.4	0.2	0.2	0.3	0.5	0.2	0.1	0	0	0	0	0	0.1	0	0
AgE13	127306	146869	AgE13_g007_t02	+	5910	8	Zinc finger protein with KRAB and SCAN domains 5	PgE107_g003_t01	MSTRG.21880.1	31.2	59	22	0.4	7.5	23.4	31.6	29.2	7.4	4.1	22.4	25.4	28.9	30.8	16.3	13.5	6.7	0.5	0.1	0.2	0.3	0	1.1	0.3	0
AgE13	136704	154569	AgE13_g008_t01	-	9581	7	Zinc finger protein with KRAB and SCAN domains 5	PgE087_g001_t02,PgE087_g003_t01	MSTRG.1694.1	33.9	126.8	61	0.9	8.2	3	3.9	3.5	1.8	2.1	13	9.1	7.3	9.8	6.5	5.3	1.5	0.2	0	0.1	0.1	0	0.8	0.2	0.1
AgE13	149177	150205	AgE13_g009_t01	.	1029	1	hypothetical protein	PgE087_g001_t02	MSTRG.1694.1	27	98.5	40.2	0.6	5	0.1	0.1	0	0	0	0.2	0	0	0.3	0	0	0.2	0	0	0	0	0	0.5	0	0.1
AgE13	154632	164187	AgE13_g010_t02	-	3754	4	Ubiquitin-conjugating enzyme E2 7, partial	PgE111_g001_t01,PgE109_g003_t01,PgE109_g002_t01,PgE030_g001_t02	MSTRG.1696.1,MSTRG.18751.1,MSTRG.21589.1,MSTRG.18752.3,MSTRG.22898.1,MSTRG.22898.1,MSTRG.21511.1,MSTRG.8297.2,MSTRG.7436.1,MSTRG.17394.1,MSTRG.22259.5,MSTRG.13376.1,MSTRG.21512.1,MSTRG.18545.1,MSTRG.16583.3	38.6	58.5	17.6	0.3	2.8	0	0.1	0.1	0.1	0	0.2	0.1	0.3	0.1	0.3	0.1	0	0	0	0	0	0	0.2	0	0.2
AgE13	166967	168921	AgE13_g011_t02	+	965	3	hypothetical protein			1	2	0.5	0	0	0.1	0.1	0	0	0	0.5	0.3	0	0.5	0.4	0.6	0.5	0	0	0.1	0	0	0	0	0
AgE13	167896	183049	AgE13_g012_t01	-	5548	11	hypothetical protein	PgE270_g002_t01,PgE116_g002_t04	MSTRG.10145.1	6.8	2.1	0.4	0	0.8	7.3	5.3	4.6	1.3	0.5	3.5	4.4	3.8	4.1	4.9	6.1	2.9	0.3	0.1	0.1	0.1	0	0.1	0.1	0
AgE13	185232	200343	AgE13_g013_t01	-	2193	11	Fem-3 mRNA-binding factor 2	PgE134_g002_t01,PgE079_g002_t06,PgE134_g001_t01	MSTRG.20499.1,MSTRG.21563.1,MSTRG.13373.1,MSTRG.20500.1,MSTRG.20500.1	16.5	2	0.9	0.2	4.1	87.5	76.1	74.5	13.5	14.5	55.8	36.3	27.8	47.3	26.1	21.5	7.9	2.4	0.6	0.7	0.9	0	2	0.7	0
AgE14	1857	49996	AgE14_g001_t02	+	1455	10	hypothetical protein	PgE010_g003_t01	MSTRG.20616.1	67.9	101.5	11	0.8	3.8	0.2	0	0	0	0.4	0.4	0.9	0.6	0.7	1.1	0.6	0.7	0.1	0.1	0.1	0.3	0	0.4	0	0.1
AgE14	51468	56076	AgE14_g002_t02	+	1345	3	beta- -galactosyl-o-glycosyl-glycoprotein beta- -n-acetylglucosaminyltransferase 4			12.7	33.8	9.9	0.5	1.8	0.8	0.2	0.3	0.1	0.7	5.5	4.4	2.4	3.8	2.4	1.4	0.9	0	0.1	0	0.1	0	0.1	0	0.1
AgE14	20116	20687	AgE14_g003_t01	.	572	1	hypothetical protein			8.7	16.6	2	0	1.5	1.5	1.5	1.5	1	0.7	4.4	1.1	0.4	2.4	1.2	0.3	0	0	0.1	0	0.1	0	0.4	0.1	0.1
AgE14	32101	33631	AgE14_g004_t06	-	1255	2	hypothetical protein			2.5	0.4	0	0	0.7	1.9	0.4	0.8	0.4	0.9	5.1	2.1	1.2	3.2	10.8	8.2	5.9	3.5	0.9	0.3	0.5	0	0.3	0.1	0
AgE14	36989	41713	AgE14_g005_t01	+	1403	9	zinc c2h2 type family protein	PgB28_g015_t01,PgE157_g001_t01,PgE044_g003_t01		3.4	0.2	0	0	0.4	3.9	1.2	0.8	0.2	0	0.3	0.7	0.2	0.1	0.8	0.5	0.5	0.1	0.1	0	0.1	0	0	0	0
AgE14	67876	85720	AgE14_g006_t02	+	2458	17	hypothetical protein	PgE010_g001_t04		79.4	148.7	13.1	0.2	1.4	0.4	0.2	0.1	0	0.1	0.3	0.7	1	0.6	1.2	0.7	1	0.2	0	0.1	0.1	0	0.4	0	0
AgE14	87845	104098	AgE14_g007_t02	-	3554	20	Neurogenic locus notch protein	PgE076_g002_t04		12.3	2	0.4	0.1	4	21.5	10.5	11.8	2.2	1.2	3.6	3.6	4.1	5.2	4.8	5.4	4.4	1.1	0.7	0.7	0.8	1.5	0.4	0.7	0.1
AgE14	113148	119264	AgE14_g008_t07	+	3256	4	Serine palmitoyltransferase 2	PgE050_g001_t02	MSTRG.22468.1	37.4	20.8	2.2	0.1	1.1	11.4	8.9	8.5	1.3	4.6	30.5	23.4	35	19.9	21.8	17.9	21.8	2.2	0.5	0.4	0.5	0	0.7	0.4	0
AgE14	106749	115012	AgE14_g009_t01	-	7463	2	Serine palmitoyltransferase 2	PgE076_g001_t03,PgE050_g001_t02	MSTRG.22468.1	13.2	7	0.7	0	0.9	1.8	1.1	1.1	0.3	0.7	4.6	3.8	2.2	3.7	3.7	3.7	2.9	0.5	0.1	0.1	0.1	0	0.1	0.1	0
AgE14	120122	132166	AgE14_g010_t04	+	3557	12	cytoplasmic polyadenylation element-binding protein 1	PgE203_g001_t02,PgE096_g001_t04,PgB41X_g004_t04,PgE038_g006_t01	MSTRG.23108.1,MSTRG.23046.2,MSTRG.18758.3,MSTRG.18758.3,MSTRG.18758.3	10.7	2	0.8	0.1	2	23.5	12.1	12.2	3.1	7.8	11.6	14.6	11.4	11.8	8.6	9	7.1	3.1	0.6	0.5	0.5	0	0.8	0.5	0
AgE14	144396	148329	AgE14_g011_t01	.	3934	1	hypothetical protein			0.2	0.1	0	0	0.1	0.1	0	0	0	0	1	0.6	0.3	0.2	0.1	0	0.1	0	0	0	0.4	0	0	0	0
AgE14	148384	149401	AgE14_g012_t01	.	1018	1	hypothetical protein			0.2	0	0	0	0	0	0.1	0	0	0	1	0.4	0	0.1	0	0	0	0	0	0	0.4	0	0	0	0
AgE14	151592	152241	AgE14_g013_t01	.	650	1	hypothetical protein			0.2	0.2	0	0	0	0	0	0	0	0	1	0.6	0.1	0.3	0	0	0.3	0	0.1	0	0.1	0	0	0	0
AgE14	158862	180541	AgE14_g014_t06	-	8646	11	poly rna polymerase gld-2	PgB08_g097_t01,PgB04_g195_t01		4.1	0.7	0.1	0	1.4	2.9	1	0.8	0.2	0.7	3.7	2.8	3	2.9	9.7	9.1	6.8	1.4	0.5	0.5	0.4	0.6	0.2	0.1	0
AgE15	16672	17203	AgE15_g001_t01	.	532	1	hypothetical protein			0.1	0.1	0	0	0.2	0	0.1	0	0	0	1.1	0.3	0.3	0.1	0.1	0	0	0	0	0	0.4	0	0	0	0
AgE15	44932	50405	AgE15_g002_t01	.	5474	1	hypothetical protein			0.1	0.1	0	0	0	0	0	0	0	0	0.7	0.6	0.2	0.2	0.1	0	0	0	0	0	0.2	0.3	0	0	0
AgE15	53365	58514	AgE15_g003_t01	.	5150	1	hypothetical protein			0.1	0.1	0	0	0	0	0	0	0	0	0.6	0.3	0.1	0.1	0.2	0	0	0	0	0	0.2	0	0	0	0
AgE15	59661	61853	AgE15_g004_t01	-	1713	3	elongator complex protein 2			1.7	0.4	0.1	0	0.1	0.4	0.2	0.3	0.2	2.8	17.4	15.1	8.7	10.1	11.8	4.7	0.8	0.3	0	0.1	0.2	0	0.3	0.1	0
AgE15	63832	72202	AgE15_g005_t19	+	2197	8	hypothetical protein	PgE288_g001_t01		20.7	1.6	0.7	0.1	4	15	6.7	6.2	1.1	2.3	9.3	6.8	5.4	7.9	17.1	16.3	10.8	2.3	0.6	0.4	0.6	0	0.7	0.3	0
AgE15	95001	102618	AgE15_g006_t10	-	3287	3	hypothetical protein			6.3	9.5	1.2	0.2	0.6	0.2	0.2	0.2	0.5	6.6	15.1	17.8	17.9	16	12.6	6.9	6	1.7	0.6	0.6	0.7	0.5	0.3	0.2	0.1
AgE15	74860	86638	AgE15_g007_t03	+	3231	10	DAZ protein 1	PgE195_g002_t01,PgE407_g001_t02,PgE367_g001_t02,PgE195_g001_t01	MSTRG.3004.1,MSTRG.18745.11,MSTRG.21517.12,MSTRG.21517.12,MSTRG.21517.12,MSTRG.23504.1,MSTRG.21686.2,MSTRG.21686.2,MSTRG.7993.2,MSTRG.18838.3,MSTRG.20533.4,MSTRG.2266.1	34.6	3.2	0.8	0.3	3.6	69.2	106.9	88.1	4.2	21	54.4	59.7	100.2	48.9	88.5	101.8	76.1	4.3	0.7	0.9	1	1.1	4.2	2.7	0.1
AgE15	109880	114520	AgE15_g008_t01	-	2617	2	hypothetical protein	PgE006_g001_t01		22.2	16.2	2.3	0.3	0.7	0.4	0.1	0.2	0	0.2	0.8	0.7	1.2	1	1.9	0.8	0.6	0	0	0	0	0	0.1	0.1	0.2
AgE15	121175	132044	AgE15_g009_t02	+	5110	6	histone rna hairpin-binding protein			3.6	2.3	0.4	0	0.7	1.2	0.5	0.6	0.2	0.1	1.1	1	1.1	1.4	8.9	7.8	3.1	1	0.3	0.2	0.2	0	0.1	0	0
AgE15	122120	135907	AgE15_g010_t01	-	10485	5	histone rna hairpin-binding protein	PgE098_g002_t02,PgE116_g001_t04		8.9	9.9	1.2	0.1	1	1	0.4	0.6	0.1	0.1	0.6	0.6	0.3	0.8	8.3	5.9	2.4	0.6	0.2	0.2	0.3	0.2	0.1	0	0.1
AgE15	138620	145527	AgE15_g011_t01	+	1869	6	hypothetical protein	PgE126_g001_t05,PgE126_g002_t01,PgE098_g001_t18	MSTRG.24378.2,MSTRG.22591.2,MSTRG.22649.1,MSTRG.21560.1,MSTRG.22355.1,MSTRG.10847.9	62.1	163.9	59.4	1.4	8	0.1	0.2	0	0.6	0.2	0.2	0.5	0.1	0.3	0.5	0.4	0.2	0	0	0	0	0	0.4	0.1	0.4
AgE15	163164	172751	AgE15_g012_t01	-	2999	2	hypothetical protein			0.9	0.2	0	0	0	3.4	3.6	3.2	0.3	0.6	4.6	7.3	5.8	4.6	3.6	1.3	0.6	0	0	0	0	0	0.2	0	0
AgE15	176279	181308	AgE15_g013_t02	+	481	5	fem-3 mrna-binding factor 2		MSTRG.20499.1	9.2	1.4	0.9	0.1	2.8	44.3	32.7	33.8	11.7	14.1	58.2	46.5	44.3	50.9	25	22.8	11	0.9	0.6	0.7	0.5	0	1.2	0.3	0
AgE16	1996	10449	AgE16_g001_t02	-	1020	4	DnaJ subfamily B member 1		MSTRG.20765.5	5.4	15	2.3	0.1	0	0	0	0	0	0	0.2	0.4	0	0.4	1.2	0.3	0.1	0	0	0	0	0	0	0	0
AgE16	15604	27697	AgE16_g002_t01	-	482	3	hypothetical protein			5.9	3.4	0.2	0	0	0.3	0.1	0.1	0.2	0	1.4	0.7	0.7	1.5	1.6	0.9	1.1	2.2	0.6	0.4	0.3	0	0.3	0.1	0
AgE16	35996	42285	AgE16_g003_t03	+	3603	3	low affinity immunoglobulin epsilon fc receptor	PgE043_g002_t01	MSTRG.21637.1	54.9	54	6.7	0.3	1.2	0.1	0.1	0	0	0	0.9	1.1	0.9	1.7	1.9	1.8	0.9	0.3	0.1	0	0	0	0.2	0	0.2
AgE16	42349	54328	AgE16_g004_t02	-	4130	7	Eukaryotic translation initiation factor 3 subunit I			4.3	6.9	0.5	0	0.1	0.2	0	0	0.1	0	0.2	0.2	0.2	0.5	0.7	0.7	0.3	0.1	0	0	0	0	0	0	0
AgE16	58122	65837	AgE16_g005_t01	-	1104	8	2-oxoisovalerate dehydrogenase subunit beta	PgE136_g001_t01		191.2	241	31.6	3.5	22	65.3	39.7	40.9	8.5	7.2	37.6	52.5	39.4	45.2	40.9	45.3	19.5	3.9	2.1	1	1.4	3.1	2.7	0.6	1.1
AgE16	76631	90647	AgE16_g006_t02	-	1212	10	Casein kinase II subunit alpha	PgE025_g001_t01,PgE028_g001_t03,PgB02X_g220_t02,PgE043_g001_t01,PgE222_g001_t02,PgE348_g001_t01,PgE039_g003_t02,PgB02X_g221_t01,PgE126_g003_t01,PgB10_g103_t01	MSTRG.23672.1,MSTRG.20803.1,MSTRG.16870.5,MSTRG.16581.1,MSTRG.21423.2,MSTRG.23808.6,MSTRG.23808.6,MSTRG.23808.6,MSTRG.21893.3,MSTRG.20625.12,MSTRG.20625.12,MSTRG.22069.3,MSTRG.21941.1,MSTRG.20409.5,MSTRG.12983.2,MSTRG.23332.3,MSTRG.20805.1,MSTRG.21747.2,MSTRG.21745.1,MSTRG.22718.1	138.6	96.4	10.8	0.5	11.8	32.2	20.2	19.2	3.1	2.2	14.3	24.2	29.3	33.1	28.6	39.6	16.9	1.2	0.2	0.1	0.5	0	1.3	0.1	0
AgE16	94080	107744	AgE16_g007_t01	+	3624	3	hypothetical protein			1.6	0.7	0	0	0.2	0.2	0.1	0.1	0	0.1	0.4	0.4	0.1	0.3	0.5	0.2	0	0	0	0	0	0	0	0	0
AgE16	95167	99123	AgE16_g008_t03	-	634	3	hypothetical protein			1.2	0.5	0.2	0	0.3	0.5	0.1	0	0	0.3	0.1	0	0	0.2	1.2	0.4	0.1	0	0	0	0.1	0	0	0	0
AgE16	99312	99982	AgE16_g009_t01	.	671	1	hypothetical protein			1.7	0.9	0	0	0.3	0	0.1	0.2	0	0	0.1	0.5	0.1	0.3	0.3	0.3	0.2	0	0.1	0	0.1	0	0	0	0
AgE16	110384	114133	AgE16_g010_t01	-	381	4	hypothetical protein			0.2	0.6	0	0	0	0.1	0.2	0	0	0	0	0	0	0.1	0	0	0	0.1	0	0	0	0	0	0	0
AgE16	120249	121078	AgE16_g011_t01	.	830	1	hypothetical protein			2.6	1.3	2.4	0.1	1.2	0.9	0.5	0.3	0.1	0.5	0	0	0.7	0.1	0.5	0.3	0.3	0.3	1	2.3	3.1	0	0.3	0.3	0.7
AgE16	137949	150685	AgE16_g012_t01	-	2087	4	Monocarboxylate transporter 12			1	0.3	1.1	0.2	2	2.9	1.6	1.8	1.1	0.5	36.6	31.3	11.6	15.6	3.2	1.8	1.6	6.4	3	2.1	3.3	0.8	0.3	0.1	0.4
AgE16	140740	141117	AgE16_g013_t01	.	378	1	hypothetical protein			4.7	3.1	5.2	0.1	1.4	0.9	0.5	0.8	1.2	0	0.1	0	1.3	0.1	1.2	0.8	1.7	1.2	2	4.8	6.3	4.6	0.8	0.9	2.2
AgE16	151585	155307	AgE16_g014_t01	.	3723	1	Type IV pilus biogenesis/stability protein PilW			0	0	0	0	0.3	0.2	0	0.1	0.2	0	0.9	0.8	0.5	0.5	0.1	0.1	0	0.2	0	0.4	0.9	0	0	0	0
AgE16	162693	165647	AgE16_g015_t01	-	306	3	hypothetical protein			5.4	26.8	1.5	0.1	1.3	17.3	10.7	10.8	2.9	1.4	0.1	1	2.6	2	11.9	12.4	38.9	2.9	0.6	1	1.3	0	0.2	0.1	0
AgE17	6871	14885	AgE17_g001_t05	-	3437	8	uridine phosphorylase 1	PgE112_g001_t06	MSTRG.23147.1,MSTRG.23147.1	21.9	64.8	5.9	0.2	2.1	1	3	2.2	0.5	1.2	2.4	3.1	6	2.6	1	0.4	0.4	0	0	0	0	0	0.3	0	0.1
AgE17	11425	20772	AgE17_g002_t01	+	6433	5	Uridine phosphorylase 1	PgE118_g002_t01		5	10.5	1.1	0.1	0.6	0.5	0.3	0.4	0.2	0.3	1.7	1.2	0.4	1.1	2.1	1.7	0.6	0.3	0	0.1	0.2	0	0.1	0	0
AgE17	17462	18053	AgE17_g003_t01	.	592	1	hypothetical protein			4.4	6.2	0	0	1.8	1.5	0.8	0.4	0	0	0.2	0.3	1.6	0.6	1.3	1.8	2.2	0.1	0.1	0.1	0.2	0	0	0	0
AgE17	29628	40835	AgE17_g004_t04	-	1503	6	KH domain-containing protein		MSTRG.20176.3,MSTRG.20176.3	32.2	22.8	3.5	0.2	4.2	45.1	22.1	24.4	5.1	3.4	14.7	21.4	26.2	15.6	33.8	27.7	20.9	2.3	1.2	0.6	0.9	0	0.7	0.3	0
AgE17	54341	67908	AgE17_g005_t12	+	934	11	hypothetical protein	PgE018_g003_t01	MSTRG.22878.5,MSTRG.22605.3	134.4	200.6	28.1	1.2	8.3	0.1	0.2	0.2	0	0.4	1.4	0.4	0.3	0.6	12.3	7.6	2.9	0.4	0	0.2	0.1	0	0.5	0	0.4
AgE17	96857	100249	AgE17_g006_t03	+	517	3	hypothetical protein		MSTRG.18395.2	0.3	0.9	0.1	0	0	0.1	0.1	0.3	0.2	0.9	4.3	7.9	7.7	6.6	20.9	13.6	2	0.8	0	0	0.6	0	0.5	0.3	0.1
AgE17	111082	122307	AgE17_g007_t01	-	3451	5	transcription factor btf3-like protein			11.3	5	0.8	0	1.4	8.5	6.2	6	3.4	5.6	45.3	44.9	33.1	34.6	33.9	33.7	16.7	3.3	0.7	0.7	0.8	0	1.5	0.6	0
AgE17	137616	145506	AgE17_g008_t02	+	1644	8	hypothetical protein	PgE118_g002_t01		14.7	44.1	3.8	0.3	1	0	0	0	0	0.1	0.5	0.4	0.3	0.3	0.9	0.7	0.9	0.1	0	0	0.1	0	0.2	0	0
AgE17	147108	159593	AgE17_g009_t02	+	8533	6	Glycogen synthase kinase-3, partial	PgB02X_g220_t02,PgE028_g001_t03,PgB02X_g221_t01,PgE126_g003_t01,PgE025_g001_t01,PgE028_g002_t01,PgE022_g006_t02,PgE222_g001_t02,PgE348_g001_t01,PgB25_g019_t01	MSTRG.16870.5,MSTRG.21423.2,MSTRG.21893.3,MSTRG.23672.1,MSTRG.20803.1,MSTRG.16581.1,MSTRG.7017.1,MSTRG.20625.12,MSTRG.20625.12,MSTRG.20937.1,MSTRG.20937.1,MSTRG.20409.5,MSTRG.22069.3,MSTRG.21941.1,MSTRG.22241.1,MSTRG.23443.1,MSTRG.23332.3,MSTRG.21745.1,MSTRG.17933.1,MSTRG.23426.4,MSTRG.20059.1,MSTRG.22376.1	7.8	9.9	0.9	0	0.2	0	0.1	0.1	0	0.2	1.8	1.4	0.9	1.8	2.8	1.1	0.3	0.1	0	0	0.1	0	0.1	0	0
AgE17	163554	167013	AgE17_g010_t01	-	946	4	Esterase			1.4	0.8	10.7	0.9	0.9	1	1.9	1.5	16.4	10.4	3.9	1.7	2.6	1.8	0.6	0.8	0.5	0.6	1	1.2	0.5	0	25.4	12	153.1
AgE18	13374	23699	AgE18_g001_t06	-	4699	7	Equilibrative nucleoside transporter 3	PgE052_g001_t04	MSTRG.20520.1,MSTRG.22385.2,MSTRG.22385.2	23.4	40.4	4.2	0.3	0.9	0.2	0.1	0.1	0.2	0.1	0.3	0.3	0.3	0.2	0.3	0.2	0.5	0	0.1	0.5	0.2	0.7	0.1	0	0.1
AgE18	28308	51413	AgE18_g002_t01	+	2500	15	Homeobox protein ceh-18	PgE146_g002_t01,PgE052_g002_t01,PgE178_g001_t01	MSTRG.20442.1,MSTRG.18621.7,MSTRG.19195.1	13.8	47.2	7.1	0.1	1.4	0.1	0.1	0	0.1	0.7	0.3	0.8	0.7	0.9	1.1	0.8	0.8	0	0	0	0.1	0	0.5	0	0.1
AgE18	54904	55627	AgE18_g003_t03	+	724	1	hypothetical protein			5.2	8.1	2.3	0.5	0.5	1.6	1	1.5	0.2	0	0	0.1	0	0	0	0	0	0	0.1	0	0	0	0	0	0.5
AgE18	56460	57047	AgE18_g004_t01	+	588	1	hypothetical protein			3.5	3	0.9	0	0.1	0.1	0	0	0	0	0.1	0	1	0	0.1	0.3	0	0.1	0.1	0.1	0	0	0	0	0.8
AgE18	61623	69684	AgE18_g005_t02	+	5126	3	Histone-lysine N-methyltransferase set-2			4.1	1.6	0.2	0	0.4	0.8	0.5	0.6	0.3	0.2	2.7	2.4	2.1	1.7	4.5	1.9	0.8	0	0	0	0	0	0.1	0	0
AgE18	70864	88046	AgE18_g006_t01	+	1592	8	hypothetical protein	PgE057_g001_t03	MSTRG.24298.2,MSTRG.24298.2	206.5	696.4	322.9	5.1	47.7	0.5	0.6	0.6	0.5	0.7	0.4	0.5	0.7	0.4	1.7	0.9	0.9	0	0	0.1	0.3	0	2.3	0.1	0.6
AgE18	92826	117094	AgE18_g007_t06	+	3255	15	DnaJ dnj-5	PgE061_g001_t06	MSTRG.20439.1,MSTRG.10846.1,MSTRG.17403.3	46.6	85.1	10.6	0.3	4.1	8.3	15.6	12.7	0.7	1	6.9	10.9	13.7	8.6	5	3.6	2.2	0.1	0	0	0.1	0	0.3	0	0.2
AgE18	119725	134863	AgE18_g008_t05	-	4164	9	transcription initiation factor iib	PgE180_g001_t03	MSTRG.22385.2,MSTRG.22385.2,MSTRG.22385.2,MSTRG.22385.2,MSTRG.21736.1,MSTRG.24118.2,MSTRG.22386.1	25.8	6	0.6	0.2	3.4	7.1	7.2	6.8	2.3	1.8	8.1	6.3	5.6	5.9	4.6	3.3	2.3	0.3	0.1	0.1	0.1	0.4	0.4	0.1	0
AgE18	138956	139446	AgE18_g009_t01	.	491	1	hypothetical protein			1.4	0.6	0	0	0	0	0	0	0	0	0	0.3	0	0	0	0	0	0	0	0	0	0	0	0	0
AgE18	148156	165046	AgE18_g010_t01	+	3931	8	hypothetical protein	PgE202_g001_t02	MSTRG.13358.5	21.7	29.7	3.4	0.1	1.4	0	0.1	0	0.1	0	0.1	0.1	0.3	0.2	0.2	0.1	0.1	0	0	0	0	0	0.1	0	0
AgE19	164	7444	AgE19_g001_t02	-	1498	11	cytoplasmic fmr1-interacting protein-like protein	PgE059_g005_t01		20.5	1.1	9.8	2.2	7.1	32.3	14.7	15.6	3.8	1	3.1	3.5	5.1	6.7	10.9	12	11.4	13.3	13.5	13.4	8.6	2.3	2.4	1.3	3.3
AgE19	11820	13848	AgE19_g002_t02	+	700	2	dna helicase ino80			9.1	1.7	7.3	6.4	5.3	24	27.3	26.3	21.8	21.3	77.6	70.1	51.7	72.8	46.2	37	23.8	32.9	30.9	24.4	24.1	4.9	22.8	18.6	21.2
AgE19	36682	82153	AgE19_g003_t01	+	437	3	hypothetical protein			3.4	7.8	0.3	0.1	1.1	1.2	1.1	0.8	0.3	0.6	0	0	0	0.2	0.6	0.6	0.2	1.1	1.2	1	0.7	0	0	0.1	0.1
AgE19	51975	69769	AgE19_g004_t05	-	983	4	FACT complex subunit SSRP1-A			10.5	7.6	26.8	36.8	8.3	18.4	12.8	12.9	4.4	2.3	11	8.8	7.1	14	13	14.4	12	13.9	13.5	12.9	12.5	8.8	11.3	8.5	2
AgE19	45976	51696	AgE19_g005_t02	-	3890	3	hypothetical protein			6.8	6.6	1.1	0	1.5	8.3	5	5	1.2	0.3	2.7	2.5	1.8	4.8	11.3	11.9	7.6	2.9	1	0.9	1.1	0.4	0.4	0.2	0.1
AgE19	86341	86750	AgE19_g006_t01	.	410	1	hypothetical protein			6.7	30.8	2.2	0.2	0.2	7	1.9	1.7	0	0	3.5	3.6	2.8	0.7	4.3	2	1.7	0.6	0.1	1.3	1.2	0	0	0	0
AgE19	99763	100462	AgE19_g007_t01	.	700	1	Transposon-derived protein		MSTRG.23333.3,MSTRG.3345.1,MSTRG.23085.2,MSTRG.21698.1,MSTRG.21598.1,MSTRG.20806.1,MSTRG.24001.1,MSTRG.24001.1,MSTRG.5629.1,MSTRG.5628.2	2.7	6.4	2.8	0.3	1.1	0.4	0.3	0.2	2.2	0.1	0.4	0.6	1.4	0.6	0.6	0.6	2.1	0.7	1.5	1.8	2.7	0	0.3	0	1
AgE19	122573	122905	AgE19_g008_t01	+	333	1	hypothetical protein			7.3	4.8	2.2	0	1.8	1.9	1.6	1.5	1	0.4	1.6	0.9	0.6	1.1	2.7	2.8	1.8	1	1.4	1.3	0	0	0.3	0	1.6
AgE19	128977	154459	AgE19_g009_t01	-	656	4	putative atp-dependent rna helicase ythdc2			14.5	1.7	4	1.7	5	26.4	8.7	9.3	4.7	1.1	2.5	4.2	6.4	10.5	9	11.2	10.5	11.1	11.1	13	10.4	7.9	0.8	1	1.9
AgE20	607	5962	AgE20_g001_t01	+	885	5	btb poz domain-containing protein 8			0.2	0.1	0.2	1.5	1.4	0.5	1.3	1.5	5.4	2.5	2.1	3.1	4.1	5.2	1.8	2.4	1.2	0.1	0	0.4	1.2	5.9	0.9	0.1	2.1
AgE20	20994	24001	AgE20_g002_t01	-	1175	3	Cytochrome c 2.1			6.5	1.4	2.8	2.9	3.4	11.2	7.7	9.6	6.9	12.3	10.7	8.3	6.3	12.1	6.3	6.8	5.9	20.5	14.9	15.6	38.8	13.2	40.3	25.7	25.3
AgE20	54631	55929	AgE20_g003_t01	.	1299	1	hypothetical protein			2	1.9	0.9	0	0.4	0.8	2.4	1.6	0.7	0.9	5.3	4	5.4	5.2	2.6	2.5	1.8	1.2	0.5	26.3	23.3	0	3.5	2.5	0.1
AgE20	57000	65500	AgE20_g004_t04	-	4035	8	E3 SUMO-protein ligase gei-17, partial			14.3	3.1	0.8	0.2	3.3	58.3	47.3	47.2	4.4	7.3	33.3	27.3	24.9	28.5	23.6	19.8	11.1	1.7	0.5	0.7	0.8	0	1.6	0.8	0
AgE20	70121	83093	AgE20_g005_t01	-	1221	10	Female germline-specific tumor suppressor gld-1, partial	PgE125_g001_t01	MSTRG.22679.6,MSTRG.23126.1,MSTRG.21090.8,MSTRG.23090.1,MSTRG.23691.6,MSTRG.22545.1,MSTRG.22545.1,MSTRG.23235.2,MSTRG.23808.6,MSTRG.23043.1,MSTRG.23043.1,MSTRG.19586.8,MSTRG.19586.8,MSTRG.19586.8,MSTRG.23567.4,MSTRG.23567.4,MSTRG.23567.4,MSTRG.23568.1,MSTRG.22547.1,MSTRG.22680.1	44.9	57.2	7.2	0.3	3.2	21.7	8.1	8.4	1.1	1.5	10.4	12.8	13	14.6	21	20.6	9	2.3	0.5	0.8	0.8	0	0.5	0.3	0
AgE20	77636	111943	AgE20_g006_t01	+	33659	2	ubiquitin carboxyl-terminal hydrolase 7			5.9	6.1	0.6	0	0.5	1.7	1	0.9	0.4	0.5	4.1	3.7	2.5	3.9	4.5	4.2	2.1	0.5	0.1	0.1	0.2	0	0.2	0.1	0
AgE20	83529	104832	AgE20_g007_t03	-	6275	14	Uncharacterized protein F07F6.1		MSTRG.21394.1,MSTRG.24352.1,MSTRG.21392.1	6.3	5.1	0.8	0	1	7.7	4.8	4.6	2.3	3.2	16.1	14.1	10.1	16.7	14	11.5	6.4	1.5	0.3	0.4	0.5	0	0.7	0.6	0
AgE20	118269	138275	AgE20_g008_t04	-	2306	13	ubiquitin carboxyl-terminal hydrolase 7		MSTRG.20522.1,MSTRG.22362.7	32	5.7	0.8	0.1	8.3	26.7	13	12.7	3.2	0.6	5.9	5.1	4.3	15.4	13.3	15	5.5	1.7	0.3	0.4	0.5	0	0.3	0.3	0
AgE21	15820	40938	AgE21_g001_t08	+	3269	17	60s ribosomal protein l17	PgE218_g001_t02,PgE321_g001_t02	MSTRG.18839.5	29	61.2	5	0.1	1.1	11.9	4.4	5.5	0.2	0.1	0.3	0.7	0.6	1.1	2.3	0.8	0.3	0.1	0	0.2	0.1	0	0	0	0
AgE21	111140	135202	AgE21_g002_t03	-	6013	17	Nuclear cap-binding protein subunit 1-B		MSTRG.23230.11,MSTRG.23230.11,MSTRG.23548.8,MSTRG.23548.8,MSTRG.23549.1	13	9.4	1.1	0	1.7	7.6	7.1	7.3	1.8	1	4.8	3.6	5	7.5	8	10.2	4.9	0.7	0.1	0.2	0.2	0	0.3	0.1	0
AgE22	1386	13868	AgE22_g001_t03	-	7215	6	Protein UBASH3A	PgE363_g002_t01,PgE660_g001_t01,PgE063_g001_t01,PgE363_g001_t01	MSTRG.16484.4,MSTRG.22983.6,MSTRG.22983.6,MSTRG.23814.1,MSTRG.23967.1,MSTRG.21902.2	8.9	17.4	2.9	0.3	1.2	1.7	1.8	1.8	1.1	0.4	2.1	1.8	1.8	2.8	1.8	1.6	1.7	0.8	0.7	0.5	0.6	1.2	0.3	0.4	0.3
AgE22	18683	19943	AgE22_g002_t01	.	1261	1	hypothetical protein			2.4	1.9	0.5	0	0.5	9.4	0.6	1	0	1.2	7.4	7.3	15	3.3	15.4	9.2	8.3	10.3	3	4.6	7	0	0.1	0	0
AgE22	28472	33659	AgE22_g003_t01	-	1182	6	zinc c2h2 type family protein	PgE157_g001_t01,PgB28_g015_t01,PgB28_g015_t01,PgE044_g003_t01,PgE044_g003_t01,PgE272_g001_t01		2.2	0.6	0	0	0	1.9	0.3	0.5	0	0	0	0	0	0.1	0.1	0.1	0.2	0	0	0	0	0	0	0	0
AgE22	42309	43426	AgE22_g004_t01	+	204	2	hypothetical protein			0	0	0	0	0	0	0	0	0	0	0	0	0	0	0	0	0	0	0	0	0	0	0	0	0
AgE22	47198	49244	AgE22_g005_t01	.	2047	1	Predicted protein			0.2	0.1	0	0	0.2	0.1	0	0.1	0	0	0	0.1	0	0.1	0	0	0.1	0	0	0	0	0	0	0	0
AgE22	52732	54405	AgE22_g006_t01	.	1674	1	hypothetical protein			0.1	0.1	0	0	0.2	0	0	0	0	0	0.3	0.2	0.1	0.1	0.1	0	0	0	0	0	0	0	0	0	0
AgE22	54567	54961	AgE22_g007_t01	.	395	1	hypothetical protein			0.1	0	0.1	0	0.1	0	0	0.1	0	0	0.3	0	0	0	0.1	0.1	0	0	0	0	0	0	0	0	0
AgE22	55015	55931	AgE22_g008_t01	.	917	1	hypothetical protein			0.2	0.2	0	0	0.6	0.2	0.1	0.1	0	0	4	3.1	0.4	1.5	0.1	0	0.1	0.5	0	0.1	0.1	0	0	0	0
AgE22	57023	66474	AgE22_g009_t01	-	5209	8	2-amino-3-ketobutyrate coenzyme A ligase	PgE050_g001_t02,PgE076_g001_t03	MSTRG.10154.1,MSTRG.22468.1,MSTRG.10155.1	27	39.9	4.3	0.1	1	0.1	0	0	0.1	0	0.1	0	0	0.1	0.1	0.1	0	0	0	0	0	0	0.1	0	0.1
AgE22	57023	62371	AgE22_g010_t01	+	4889	3	2-amino-3-ketobutyrate coenzyme a		MSTRG.20497.1	10.4	10.9	1.5	0	0.3	0	0	0	0	0.1	0	0.1	0	0	0.1	0	0	0	0	0	0	0	0	0	0
AgE22	64084	64301	AgE22_g011_t01	+	218	1	2-amino-3-ketobutyrate coenzyme a	PgE050_g001_t02	MSTRG.10154.1	48	107.5	8.1	0.3	2.5	0	0.1	0	0	0	0	0	0	0	0	0	0	0	0	0	0	0	0	0	0
AgE22	84584	97375	AgE22_g012_t05	-	919	9	Tau-tubulin kinase 2	PgE397_g001_t01,PgE232_g001_t04,PgB10_g103_t01,PgB22_g041_t04,PgB25_g018_t01,PgE021_g005_t04,PgE498_g001_t01,PgE078_g001_t01	MSTRG.18388.5,MSTRG.18753.1,MSTRG.21655.5,MSTRG.22718.1,MSTRG.17769.3,MSTRG.13368.2,MSTRG.19589.1,MSTRG.21667.1,MSTRG.23846.1,MSTRG.17766.1,MSTRG.22376.1,MSTRG.20353.1,MSTRG.23052.1	15.2	39.2	4.4	0.2	2.1	0	0	0	0	0	1.4	1.4	1.5	1.2	2.9	2.4	0.5	0.1	0	0	0	0	0.2	0	0
AgE22	112091	130714	AgE22_g013_t05	+	5893	6	Protein AF-9	PgE159_g002_t02	MSTRG.23048.1,MSTRG.23048.1	16.2	13.2	1.6	0.1	0.8	2.3	1.6	2.1	0.6	1.1	6.5	5.7	6.1	6.9	18.7	14.5	6.8	1.1	0.4	0.4	0.2	0.3	0.5	0.1	0
AgE23	1646	18440	AgE23_g001_t01	+	5920	8	Testis-specific serine/threonine-protein kinase 2	PgE222_g001_t02,PgE039_g003_t02,PgB37_g005_t03,PgE277_g001_t02,PgE028_g001_t03,PgE056_g003_t06,PgE088_g002_t01,PgE025_g001_t01,PgB02X_g220_t02,PgB25_g019_t01,PgB25_g018_t01	MSTRG.21941.1,MSTRG.22069.3,MSTRG.20409.5,MSTRG.16870.5,MSTRG.16581.1,MSTRG.23400.4,MSTRG.12983.2,MSTRG.23796.1,MSTRG.7427.1,MSTRG.23125.4,MSTRG.22241.1,MSTRG.21893.3,MSTRG.17933.1,MSTRG.23672.1,MSTRG.21423.2,MSTRG.23332.3,MSTRG.20803.1,MSTRG.22070.1	20.7	22.8	2.4	0.1	1.8	4.3	3.6	2.9	1.3	5.7	30.4	26	15.3	15.7	12.3	9.5	2.9	0.6	0.1	0.2	0.3	0	0.7	0.2	0
AgE23	3552	18350	AgE23_g002_t01	-	12742	2	PRA1 family protein 3	PgE068_g006_t01		10.2	12.2	1.3	0.1	0.8	1.8	1.3	1.1	0.6	1	6.4	5.1	2.9	4.8	3.2	2.1	1.3	0.2	0	0.1	0.1	0	0.3	0.1	0
AgE23	19925	27916	AgE23_g003_t02	-	3350	6	hypothetical protein			42.1	156.3	45.1	0.7	5	0.1	0.1	0	0.2	0.1	0.2	0.1	0	0.1	0.1	0.1	0.1	0	0	0	0.1	0	0.4	0	0.1
AgE23	37883	39858	AgE23_g004_t01	+	450	2	hypothetical protein			0.2	0.4	0	0	1.6	0.1	0.1	0.1	2	0.6	0.1	0.5	0	0.3	2.8	2.1	1.6	0	0.1	0	0	0	181.9	69.7	0.1
AgE23	69297	82561	AgE23_g005_t02	-	2159	11	Fem-3 mRNA-binding factor 2	PgE079_g002_t06,PgE134_g002_t01	MSTRG.13373.1,MSTRG.21563.1,MSTRG.20499.1	5	0.4	0.6	0.2	0.9	13.4	10.9	9.8	2.8	10.2	24.8	28.8	31.9	43.7	24.5	15.2	10	2.1	1.5	1.6	1.3	2.4	0.9	0.6	1
AgE23	84939	90504	AgE23_g006_t01	+	699	2	hypothetical protein			2	1.9	0.3	0	0.1	0.2	0.2	0.4	0	0	0.8	0.7	1.9	1.1	2.1	1.2	2.4	0.1	0	0	0	0	0	0	0
AgE23	90619	99985	AgE23_g007_t03	-	3015	7	hypothetical protein	PgE186_g001_t04	MSTRG.20934.4,MSTRG.20934.4,MSTRG.20935.1	8.7	1	0.3	0	4.2	16.4	13.7	13.8	6.4	13.9	71.5	78.9	58.7	55.2	48.3	43.6	24.6	4.3	0.4	0.9	1.2	0	2.9	1	0
AgE23	109312	112631	AgE23_g008_t01	+	336	4	ubiquitin carboxyl-terminal hydrolase 7	PgE053_g002_t04	MSTRG.20929.1,MSTRG.20880.1	4.8	2.3	0.4	0	0.2	5.7	8	6.6	1.6	5.4	26	31.8	59	26.5	9.3	11.6	5.7	0.8	0.1	0.2	0.4	0	1	0.5	0
AgE23	113540	118849	AgE23_g009_t01	-	3732	4	Kinesin-like protein KIF14		MSTRG.10388.3	2.3	0.3	0.2	0	0.3	11.5	11.8	12.3	2.6	4.7	18	10.9	6.2	15	7.8	3	0.9	0.2	0.2	0.2	0.1	0	0.8	0.4	0
AgE23	119890	120309	AgE23_g010_t01	-	420	1	Uncharacterized protein K02A2.6	PgE295_g001_t02,PgE011_g005_t01	MSTRG.18626.6,MSTRG.21881.2,MSTRG.21881.2,MSTRG.21606.1,MSTRG.21606.1,MSTRG.22256.2,MSTRG.22256.2,MSTRG.22257.1,MSTRG.22257.1,MSTRG.23159.1	0.1	0	0	0	0	0.2	0.2	0.1	0	0	0	0	0	0	0.2	0	0	0	0	0.1	0	0	0	0	0
AgE24	4192	10420	AgE24_g001_t06	+	1484	4	hypothetical protein		MSTRG.21402.1,MSTRG.8294.2	32.8	36.1	3.2	0.2	2.3	0.1	0.1	0	0	0.1	0.5	0.1	0	0.4	2	1.4	1	0.1	0	0	0	0	0.1	0	0.1
AgE24	11650	12030	AgE24_g002_t01	+	381	1	hypothetical protein	PgE044_g001_t01		0	0	0.2	0	0	0	0	0	0	0	0	0.3	0	0.2	0.4	0	0	0	0	0	0	0	0	0	0
AgE24	12268	31458	AgE24_g003_t01	+	2046	16	general transcription factor iif subunit 1	PgE237_g001_t01	MSTRG.23268.21,MSTRG.23268.21	10.1	3.7	1	0.1	4.5	14.1	16.7	16.4	4.7	7.4	48.1	67.8	105.6	52.8	34.5	34.5	22.6	2.2	0.3	0.8	0.6	0	1.6	0.6	0.1
AgE24	49157	57471	AgE24_g004_t06	-	1209	7	Aromatic-L-amino-acid decarboxylase		MSTRG.21322.2	18	122.8	10.8	0.2	2.7	0.1	0	0	0	0	0.1	0	0.2	0.1	0.5	0.3	0.2	0	0	0	0.1	0	0.3	0	0
AgE24	59378	72517	AgE24_g005_t03	+	2612	10	Serine/arginine-rich splicing factor 12		MSTRG.20533.4,MSTRG.18838.3,MSTRG.21686.2,MSTRG.7993.2,MSTRG.9590.1,MSTRG.18748.3	16.3	9.8	1.2	0.1	1.7	2.4	2.6	2.7	1.5	1.8	10.9	8.7	6.9	7.2	5.2	5.4	2.1	0.8	0.4	0.2	0.2	0	0.7	0.2	0
AgE24	73294	76425	AgE24_g006_t02	+	1295	3	Transcription initiation factor TFIID subunit 11	PgE257_g002_t02	MSTRG.22118.3,MSTRG.24371.1	11.1	3.7	0.4	0	4.9	5.2	3.5	3.7	3.2	3.7	17.3	9.3	5.3	11.9	8.3	9.6	4	1.8	1	0.3	0.4	0	1.2	0.5	0
AgE24	84594	87158	AgE24_g007_t04	+	1227	3	hypothetical protein			1.1	0.1	0.1	0	0.1	0.9	0.4	0.3	0	0	1	1.8	2	1.5	3.8	3.9	2	0.2	0	0.1	0.2	0	0	0	0
AgE24	90421	103483	AgE24_g008_t03	-	2907	9	pdz domain containing protein	PgE068_g004_t02	MSTRG.10153.1,MSTRG.23893.1,MSTRG.19583.3,MSTRG.20164.1,MSTRG.4191.1,MSTRG.23256.1,MSTRG.19567.1,MSTRG.23582.7	30.6	49	13.7	0.2	2.1	0.9	0.5	0.8	0.2	0.1	0.7	0.6	0.8	0.9	2	1.4	0.9	0.1	0	0.1	0.1	0	0.2	0	0
AgE24	103661	119228	AgE24_g009_t03	-	8333	5	hypothetical protein			6.4	13.6	1.3	0.1	0.4	0	0	0	0	0	0.1	0.1	0.2	0.2	0.4	0.3	0.1	0	0	0	0	0	0	0	0
AgE24	111976	119438	AgE24_g010_t04	+	7033	2	hypothetical protein			8.4	15.5	2.1	0.1	0.3	0	0	0	0	0	0	0.1	0.1	0.1	0	0	0	0	0	0	0	0	0	0	0
AgE25	966	12701	AgE25_g001_t06	-	1339	7	hypothetical protein		MSTRG.24084.1,MSTRG.24085.5	90.8	83.2	9.9	0.5	21.7	31.2	40.2	42.4	7.9	5.5	36.6	36.6	39.5	52	30.9	29.1	14	2.5	0.7	0.7	1	0	2	0.7	0.1
AgE25	14700	37047	AgE25_g002_t05	+	3571	9	regulator of microtubule dynamics protein 1	PgB36X_g003_t01,PgE412_g001_t01	MSTRG.18616.4,MSTRG.23278.1,MSTRG.21516.2	59.3	312.3	193	2.1	18.2	0.3	0.4	0.3	0.8	0.3	1.9	2	1.5	2	3.1	3.2	2	0.4	0.1	0	0.5	0	1	0	0.1
AgE25	18167	37285	AgE25_g003_t04	-	9544	11	Branched-chain-amino-acid aminotransferase, partial	PgB36X_g004_t03	MSTRG.20165.1,MSTRG.21692.1,MSTRG.21692.1	91.1	445.3	281	3.8	27.2	0.5	0.6	0.3	0.6	0.5	0.5	0.5	0.4	0.5	0.9	1.3	0.8	0.1	0	0	0.2	0.2	1.8	0	0.5
AgE25	26134	27950	AgE25_g004_t01	.	1817	1	Branched-chain-amino-acid aminotransferase, partial			52.7	184	78.2	1.5	11.2	0.1	0.1	0.1	0.2	0	0.1	0.2	0.1	0.1	0.3	0.1	0.2	0	0	0	0.2	0	0.9	0	0.3
AgE25	39076	49380	AgE25_g005_t02	-	2072	9	hypothetical protein	PgB36X_g005_t03	MSTRG.20535.2,MSTRG.22400.1,MSTRG.20529.2	39.5	142.6	72.5	0.8	7.7	0.2	0.2	0.1	0	0	0.7	0.5	0.3	0.6	1.8	1.2	0.7	0.1	0.1	0.1	0.1	0	0.4	0	0.1
AgE25	53239	67848	AgE25_g006_t04	+	5427	8	homeobox protein ceh-18	PgE178_g001_t01,PgB36X_g007_t02		10.5	3.4	0.6	0	2.7	9.4	5.4	5.4	0.8	0.9	3.9	5.5	4.7	7.9	9.5	9.6	5.4	1.7	0.5	0.5	0.4	0	0.2	0.2	0
AgE25	74485	78623	AgE25_g007_t01	-	1556	3	hypothetical protein	PgE386_g001_t01		3.8	1.8	0.3	0	0.9	5.3	3.1	2.7	1.1	0.9	8.4	7.4	3.9	5.6	8	5.4	4.5	0.6	0.3	0.1	0.3	0	0.5	0.1	0
AgE25	83983	89986	AgE25_g008_t02	-	1101	6	insulin-like receptor	PgE080_g001_t07,PgE189_g001_t02	MSTRG.23044.10,MSTRG.23044.10	207.6	559.6	49.6	2.2	31.9	9.8	8.2	9.3	3.4	2.1	12.2	9.2	10.2	20.5	43.9	61	33	11.3	2.5	1.4	2.8	1.6	3.3	0.7	0.5
AgE25	93946	105151	AgE25_g009_t03	+	2658	5	hypothetical protein	PgE080_g002_t03		9.1	13	1.5	0.1	1	5	2.5	2.2	1.2	2.9	17.5	23.3	18	18.3	34.2	30.2	34.7	3.5	0.4	0.5	0.8	0.7	1	0.5	0.1
AgE25	108430	116746	AgE25_g010_t01	+	871	7	horma domain-containing protein 1	PgE005_g007_t04	MSTRG.21609.1	28.8	2.2	0.9	0.2	3.4	36.5	23.8	23.8	11.8	8.6	53.8	53.3	44.7	87.7	84.5	60.4	32.1	8.9	2	1.2	3	0	1.3	0.6	0
AgE26	5399	28339	AgE26_g001_t02	+	13823	11	4-hydroxybutyrate coenzyme A transferase	PgB22_g044_t02	MSTRG.22652.1,MSTRG.23321.6,MSTRG.23321.6,MSTRG.22627.1,MSTRG.4175.1,MSTRG.22543.7	25.5	75.2	10.5	0.3	2.2	0.5	0.5	0.4	0.1	0.1	0.4	0.7	0.7	0.8	2.2	2.8	1.2	0.4	0.1	0.1	0.1	0	0.3	0.1	0.1
AgE26	16606	37061	AgE26_g002_t01	-	6010	16	ubiquitin carboxyl-terminal hydrolase 7	PgB22_g042_t04,PgE053_g002_t04	MSTRG.21577.15,MSTRG.20880.1,MSTRG.20929.1	20.7	28.4	3.6	0.1	2.5	3.2	2.4	2.7	0.2	0.2	1.5	1.9	4	3.3	9.8	15	9.6	1.6	0.4	0.4	0.4	0	0.6	0.2	0.2
AgE26	61219	71238	AgE26_g003_t02	+	2653	10	Tau-tubulin kinase 2	PgB22_g041_t04,PgB25_g018_t01,PgB10_g103_t01,PgE078_g001_t01,PgE021_g005_t04,PgE111_g002_t03,PgE149_g003_t02,PgE232_g001_t04,PgE156_g001_t11,PgE059_g007_t01,PgE397_g001_t01	MSTRG.22376.1,MSTRG.22376.1,MSTRG.16874.1,MSTRG.17769.3,MSTRG.22673.1,MSTRG.20059.1,MSTRG.23426.4,MSTRG.23426.4,MSTRG.22167.7,MSTRG.23846.1,MSTRG.23052.1,MSTRG.22718.1,MSTRG.21667.1,MSTRG.13365.1,MSTRG.13368.2,MSTRG.20782.13,MSTRG.19589.1,MSTRG.20353.1,MSTRG.21747.2,MSTRG.21745.1,MSTRG.22403.2,MSTRG.18753.1,MSTRG.18388.5,MSTRG.17766.1,MSTRG.21615.1,MSTRG.17765.1,MSTRG.20409.5,MSTRG.22069.3	55.2	80.1	8.1	0.4	4.5	6.4	4.4	4.4	1	0.8	6.5	5.6	6.7	8.6	7.3	6.9	3.7	1.1	0.3	0.3	0.2	0	0.5	0.1	0
AgE26	71655	101628	AgE26_g004_t04	+	2084	15	hypothetical protein	PgB22_g040_t02	MSTRG.10847.9,MSTRG.13359.1	21.5	84.1	18.2	0.3	4.5	1.6	1.4	1.5	0.8	1.5	3.6	4.2	3.2	4.4	6.7	6.9	4.2	0.4	0.2	0.2	0.4	0.8	0.4	0	0.1
AgE26	104511	116466	AgE26_g005_t01	-	4902	5	Phosphate carrier protein	PgB22_g038_t01	MSTRG.22506.1,MSTRG.21518.1,MSTRG.21518.1	76.8	36.9	4	0.2	1.4	0.1	0.1	0.1	0.1	0.1	1	1	1.8	1.3	0.7	0.6	0.4	0.1	0	0	0	0	0.1	0	0
AgE27	10979	33063	AgE27_g001_t07	-	2586	8	hypothetical protein	PgB22_g040_t02,PgB22_g040_t02,PgB22_g040_t02	MSTRG.10847.9,MSTRG.10847.9,MSTRG.10847.9,MSTRG.10847.9	21	103.4	30.8	0.6	4.6	0.3	0.2	0.1	0.1	0.2	0.6	0.7	0.7	0.6	1.7	1	0.6	0.1	0.1	0	0.1	0	0.6	0	0.2
AgE27	45505	52911	AgE27_g002_t02	-	654	6	ephrin type-a receptor 3	PgE147_g001_t10	MSTRG.18317.15,MSTRG.18317.15	21.7	59.1	6.2	0.1	1.9	0.1	0	0.1	0	0	0.8	0.8	1.2	2	5	4.2	2.4	0.1	0	0.1	0.1	0	0.2	0	0
AgE27	70757	73552	AgE27_g003_t01	+	528	4	hypothetical protein			21.3	28	2.5	0	0.7	4.2	2.1	1.8	0	0.1	1.5	1.9	0.3	2.9	3.2	1.6	0.7	0	0	0.1	0	0	0.1	0.1	0
AgE27	74910	78875	AgE27_g004_t02	+	2556	3	Patched domain-containing protein 3			5.7	15.6	3.9	0.2	0.6	0.3	0.2	0.1	0.6	0.2	0.2	0.4	0.1	0.2	0.2	0.3	0	0	0	0.3	0.6	2	0.3	0.8	0.1
AgE27	79144	90243	AgE27_g005_t01	+	3321	12	Patched domain-containing protein 3	PgE131_g001_t01		17.4	51	33.7	1.3	3	0.5	0.5	0.6	3.8	2.2	0.6	0.8	1.1	1.5	1.5	1	0.1	0.1	0.2	2	9.1	5.7	2.8	6.7	0
AgE27	90979	96612	AgE27_g006_t01	+	2452	4	patched domain-containing protein 3	PgE131_g001_t01		6.6	18.9	12.6	0.3	1.6	0.4	0.2	0.4	2	2.6	2.1	2.3	1.8	2.7	4.8	2.6	0.8	0.1	0.3	1.4	7.7	11.3	3.5	9.2	0
AgE27	96670	101610	AgE27_g007_t01	-	4417	3	hypothetical protein			0.6	0.3	0.5	0.1	0.1	0	0	0	0.3	0.2	0.6	0.4	0.3	0.4	0.9	0.7	0.3	0	0	0.2	0.7	1.6	0.2	0.2	0
AgE27	106892	108780	AgE27_g008_t01	-	345	2	hypothetical protein			0	0.3	0	0	3.5	0.1	0.1	0.1	1.6	4.9	0.6	0.5	0.5	0.1	0.3	0.1	0.3	0	0	0	1.3	0	558.6	382.9	0
AgE28	1307	2893	AgE28_g001_t01	-	581	2	Tyrosine-protein phosphatase non-receptor type 6	PgE293_g001_t01,PgE229_g002_t04	MSTRG.21654.2,MSTRG.20010.1,MSTRG.22327.1,MSTRG.23873.1,MSTRG.18835.3,MSTRG.22740.5,MSTRG.22741.1,MSTRG.20793.1,MSTRG.23028.1	13.2	35.4	2.5	0.1	1.3	0.4	1.2	0.6	0	0	0.7	1.2	0.9	2.8	5.4	5	2.3	3.5	0.7	0.1	0	0	0.4	0.1	0
AgE28	1307	4817	AgE28_g002_t01	+	2603	3	Tyrosine-protein phosphatase non-receptor type 6			9.2	29.3	2.5	0	0.7	0.5	1.2	1	0.2	0	0.6	0.6	0.4	1	2	2	1.8	0.9	0.2	0.1	0.1	0	0.2	0	0.1
AgE28	19756	28683	AgE28_g003_t04	+	8928	1	tyrosine-protein phosphatase non-receptor type 9			7.3	16.9	2	0	0.3	0.9	1.9	1.8	0.3	0	0.7	0.4	0.5	1	1.7	0.9	0.6	0.4	0.1	0	0	0	0.1	0	0
AgE28	11459	22750	AgE28_g004_t01	-	8853	4	Tyrosine-protein phosphatase non-receptor type 6	PgE293_g001_t01,PgE229_g002_t04	MSTRG.18835.3,MSTRG.21654.2,MSTRG.20010.1,MSTRG.21920.4,MSTRG.23873.1,MSTRG.22327.1,MSTRG.1831.1,MSTRG.23028.1,MSTRG.20793.1,MSTRG.23026.4	3.8	9.5	0.9	0.1	0.2	1.6	2.2	2.1	0.4	0	0.5	0.3	0.2	0.5	1.3	1.1	0.6	0.5	0.1	0	0	0	0	0	0
AgE28	28981	33588	AgE28_g005_t01	-	1097	6	hypothetical protein	PgE314_g001_t02	MSTRG.18545.1,MSTRG.13375.1	50.7	87.9	18.1	0.4	9.7	1	1.4	1	0.3	0.2	2.3	2.4	3.5	1.3	1.3	0.7	0.7	0	0	0	0	0	0.3	0	0.6
AgE28	35094	47213	AgE28_g006_t03	-	1421	9	hypothetical protein	PgE387_g001_t03	MSTRG.22320.3,MSTRG.22320.3	10.9	21.5	1.4	0.1	0.4	0.1	0	0	0	0	0.3	0.5	0.6	0.1	0.6	0.2	0	0	0	0	0	0	0	0	0
AgE28	49280	61797	AgE28_g007_t04	+	1859	9	Zinc finger CCCH domain-containing protein 4	PgE191_g001_t03	MSTRG.21656.5	65.1	8.1	2.2	0.1	24.2	107.2	73.4	70.1	9.9	5.1	17.3	13.8	11.9	16.6	33.9	35.8	18.4	3.2	0.8	1.2	1.3	0	1.9	1.9	0
AgE28	68619	73832	AgE28_g008_t02	+	4420	2	Adhesive plaque matrix protein (Fragment)			6.7	5.7	0.9	0	0.7	7.4	2.1	3.1	0	0	0.6	1.5	1.1	1	9.6	6.8	8.3	1	0.5	0.3	0.6	0	0	0	0
AgE28	76061	80607	AgE28_g009_t02	+	2858	2	hypothetical protein			14.5	53	2.4	0	0.7	1.8	1	1	0	0.1	0.3	0.5	1	0.6	7.6	6.3	14.5	1.7	0.5	0.7	1	0	0.2	0	0
AgE29	25812	31579	AgE29_g001_t18	+	1270	6	KH domain-containing protein		MSTRG.22564.1,MSTRG.20176.3,MSTRG.20176.3,MSTRG.20176.3	26.1	22.4	3.6	0.1	4.3	28.2	13.5	13.1	2.3	2.5	17.9	20.6	21.5	16.4	33.6	26	13.3	3.2	0.9	1.1	0.4	0	0.9	0.7	0
AgE29	37519	56034	AgE29_g002_t02	-	5450	15	nuclear receptor-binding protein	PgE035_g002_t08,PgB25_g019_t01,PgE088_g002_t01	MSTRG.20187.3,MSTRG.18317.15,MSTRG.17933.1,MSTRG.23443.1	17.7	6.6	1.4	0.1	1.3	48	32.3	33	3.5	5.7	18.5	18.1	19.5	14.1	13.5	14.7	9.1	1.7	0.5	0.8	0.8	0.6	1	0.7	0
AgE29	64176	84718	AgE29_g003_t02	-	9463	7	kh domain-containing protein	PgE023_g004_t05,PgE106_g002_t02,PgE104_g001_t02	MSTRG.2298.1	6.6	9.5	2	0.1	0.6	1.3	1	1	0.3	0.3	1.8	1.3	0.8	1.2	2.9	1.7	0.7	0.3	0.1	0.1	0.1	0.4	0.1	0.1	0
AgE29	88625	91548	AgE29_g004_t01	+	1386	4	tRNA selenocysteine 1-associated protein 1			2.8	1.4	0.6	0.7	1.8	6.8	4.8	5.7	1.5	3	8.6	8	4.7	8.5	7.4	10.7	6.3	9.8	8.3	5.4	4.1	0	5.2	2.3	3
AgE29	96189	99495	AgE29_g005_t01	+	537	5	Phosphoglycerate kinase			59.6	16.2	44.7	30.8	20.2	162.4	135.3	129.1	35.8	69.9	187.4	138.9	102.7	186.3	134.6	134.1	71.9	119.6	61.7	28.6	22.8	93.4	117.6	156.8	104.1
AgE30	25441	29563	AgE30_g001_t03	-	763	5	Cadherin-related hmr-1, partial			52.3	4.8	4	0.4	9.4	63.1	42	40.4	5.8	1.6	8.9	19.3	45.9	28.8	78.2	59.7	128.9	21	19.3	24	30.5	9.1	0.7	0.5	0.1
AgE30	17988	36123	AgE30_g002_t04	-	1466	9	Cadherin-related hmr-1, partial		MSTRG.23441.1	32.4	7.3	2.3	0	6.7	47.7	28.8	26.4	8.7	0.6	6.4	11.6	14	32.1	63	62.5	43.1	30.6	36.3	52.4	65.1	7.1	0.5	0.7	0.1
AgE30	20588	20972	AgE30_g003_t01	.	385	1	hypothetical protein			5.5	4.7	2.7	1	1.6	2.8	1.4	1.3	0.3	0.1	0.4	0.1	0	0.2	2.1	0.6	0.1	0.6	0	0.2	0.2	0	0	0	0
AgE30	36900	40552	AgE30_g004_t02	-	1113	4	Transcription activator BRG1	PgE113_g002_t06		16	1.8	1.9	0.3	2.3	4.2	2.3	2.8	1.5	0.5	2	1.6	3.6	8.2	15.8	21.4	20.8	18.2	17.4	18.5	16.4	6.2	0.9	0.3	1
AgE30	52756	56243	AgE30_g005_t01	-	492	2	Transcription activator BRG1			12.2	0.5	1.3	0.1	1.5	7.6	4.8	5.2	1.1	1	3	9.5	14	10.7	21.1	30.1	43	9.6	10.3	13.3	9	7	0.5	0.2	0.7
AgE30	58299	90986	AgE30_g006_t01	-	276	3	Transcription activator BRG1			7.1	1.1	1.7	0.2	1.4	4.7	2.1	2.3	1.6	0.8	2.1	2.8	3.1	4.2	11.7	16.9	12.1	18.3	18.3	16.4	14.5	0	0.7	0.1	1.7
AgE30	76492	84380	AgE30_g007_t01	-	246	2	ATP-dependent helicase brm, partial			13.5	1.1	1	0.1	2.9	5.4	2.8	2.7	0.4	0	1.5	1.7	2.4	6.1	12.5	13.3	8.4	14.6	10.5	12.6	13.3	7	1	0.1	0.2
AgE30	77528	83299	AgE30_g008_t01	-	1658	2	Transcription activator BRG1, partial			10.3	0.6	0.6	0	1.3	3.5	1.4	1.3	0.8	0.1	1	0.5	1.2	2.6	6.6	6.3	5.9	5	3.9	4.3	3.8	0	0.2	0.1	0.1
AgE31	22184	25091	AgE31_g001_t02	+	2164	3	putative trna threonylcarbamoyladenosine biosynthesis protein osgep			4.2	7.2	1.1	0	0.2	0.1	0	0.1	0.1	0.1	1.1	0.7	0.9	1.5	4.6	6.2	3	0.3	0.2	0	0.1	0	0.2	0	0
AgE31	27179	34728	AgE31_g002_t02	-	1861	9	Cyclic AMP-responsive element-binding protein 3-like protein 1	PgE153_g001_t01	MSTRG.21945.1,MSTRG.21821.1,MSTRG.21821.1	52.5	9.1	1.5	0	5.1	29.1	23	22.3	3.9	3.3	25.1	19.5	14.9	22.8	25.9	16.6	8.2	1.1	0.4	0.3	0.6	0	1	0.6	0
AgE31	35111	46174	AgE31_g003_t01	+	1941	14	Tubulin beta-1 chain	PgE153_g002_t01,PgE274_g001_t02,PgE007_g001_t01,PgE014_g001_t07,PgB35_g008_t03,PgE153_g003_t01,PgE040_g001_t07,PgE040_g001_t07,PgE261_g002_t01,PgE261_g001_t01,PgE459_g001_t02,PgE459_g001_t02	MSTRG.22771.4,MSTRG.22951.3,MSTRG.22951.3,MSTRG.22951.3,MSTRG.22951.3,MSTRG.21951.9,MSTRG.20623.1,MSTRG.20623.1,MSTRG.20623.1,MSTRG.22952.1,MSTRG.22952.1,MSTRG.22953.1,MSTRG.22953.1,MSTRG.22954.1,MSTRG.21820.1,MSTRG.20800.1,MSTRG.20800.1,MSTRG.21949.2,MSTRG.21949.2,MSTRG.21949.2,MSTRG.19994.2,MSTRG.19994.2,MSTRG.21945.1,MSTRG.4175.1	211.7	71.1	22	2.1	29.4	432.7	332.6	339.3	79.6	145.2	722.7	967	1084.2	1448.3	1173.9	2331.6	1768.4	127	12.6	21	19.9	0.9	32.6	20	0.7
AgE31	44640	45808	AgE31_g004_t01	+	497	2	hypothetical protein	PgE153_g003_t01	MSTRG.21820.1	28.5	102.5	48.1	1.5	5.2	1	0.2	0.4	0	0.3	0.7	4.1	2.1	3.8	2.9	1.3	0.8	0.2	0	0	0.2	0	0.9	0	0.1
AgE31	55906	58532	AgE31_g005_t01	+	2627	1	Global transcription activator SNF2L2, partial	PgE113_g002_t06		4.8	4	0.5	0	1.3	3.6	4.3	4.5	3.3	1.1	5.7	4.4	3.6	12.3	5	4.7	1.3	0.5	0	0	0.1	0	0.2	0.1	0
AgE31	57819	64571	AgE31_g006_t01	-	1358	8	ATP-dependent helicase brm	PgE113_g002_t06		14.6	9.5	1.4	0	5.7	9.4	7	8.6	4.4	7.1	36.8	40.1	37.6	41.8	20.8	19.3	7.1	1.5	0.2	0.4	0.5	0	0.4	0.4	0
AgE31	59746	60380	AgE31_g007_t01	.	635	1	atp-dependent helicase brm	PgE113_g002_t06		3	2	0.5	0	1.6	1	0.6	1.3	0.7	0	0.3	0.2	0	0.5	0.1	0.1	0.4	0	0	0	0	0	0	0	0
AgE31	64961	72071	AgE31_g008_t01	+	1154	7	DNA repair and recombination protein RAD54B	PgE113_g002_t06		16.8	1.2	3.1	3.5	8.8	30	13.8	14.7	4.9	1.8	7.7	6.8	6.2	17.1	19	22.4	11.3	15.4	15.3	13.6	9.2	6	1.2	0.9	2.3
AgE31	78900	81143	AgE31_g009_t04	+	775	4	hypothetical protein			21.4	1.5	2.8	3.1	12.3	19.7	10.4	8.1	6.5	3.7	22	24	19.9	29.5	38	49	28.9	28	27.2	24.7	16.8	24.5	5	3.3	4.8
AgE32	9101	11685	AgE32_g001_t01	+	728	5	zinc c2h2 type family protein	PgE044_g003_t01,PgB28_g015_t01,PgE157_g001_t01,PgE272_g001_t01		1	0.2	0	0	0	3.4	0.8	1.3	0	0	0.1	0.1	0.2	0.1	1.5	1.4	2.5	0.2	0.1	0	0	0	0	0	0
AgE32	11753	15662	AgE32_g002_t02	-	3910	1	NADH dehydrogenase subunit 2 (mitochondrion)			0.5	0.2	0	0	0	0.4	0.1	0.2	0	0.1	0.5	0.5	0.5	0.6	8.5	5.8	2.2	0.6	0.2	0.1	0.2	0	0	0	0
AgE32	31771	32224	AgE32_g003_t01	.	454	1	hypothetical protein			1.8	3	0.2	0	0.2	2.1	1.6	1.7	0	0	0.1	0.2	0	0.2	2.6	2.7	1.3	0.4	0.1	0.2	0.2	0	0.1	0	0
AgE32	34744	74290	AgE32_g004_t03	-	346	4	Pleckstriny domain-containing family G member 6			12.2	6.3	2.5	0.2	5.5	79.1	38.1	33.2	4.1	2.2	12.3	10.9	8.4	19.4	32.7	43.1	25.1	5.3	2.8	2.7	2.3	0	0.7	0.6	0.1
AgE33	48172	69774	AgE33_g001_t20	+	1048	7	Ran-binding protein 9			35.6	12.1	2	1.3	11.1	20	11.1	11.4	2.1	0.6	1.2	2.4	3.4	6.8	40.9	59.7	62.5	11.8	6.3	5.6	5.1	0	0.5	0.3	0
AgE33	74601	75046	AgE33_g002_t01	.	446	1	hypothetical protein			0	0.3	0.6	0.4	0.8	0.1	0.4	0.8	0	0	0	0	0	0	0	0.1	0	0	0.3	0.1	0	0	0	0.1	0.1
AgE34	206	3641	AgE34_g001_t02	+	1098	6	Baculoviral IAP repeat-containing protein 6			9	12.9	1.6	0.2	1.7	16.3	10.4	9.7	2.7	3.3	2.4	2.4	2.3	3.4	25.7	32.4	18.7	4.7	2.4	2.3	2.4	0	0.5	0.3	0.2
AgE34	35444	41095	AgE34_g002_t01	-	2700	7	e3 ubiquitin-protein ligase			1.3	0.1	0	0	0.2	2.3	0.7	0.7	0.4	0.1	2.5	2.6	2.2	2.6	4	4.2	2.2	0.2	0.2	0.1	0.2	0	0.2	0.1	0
AgE34	54668	57576	AgE34_g003_t04	+	2259	3	zinc c2h2 type family protein			0.6	0.2	0.2	0	0	0.5	0.3	0.3	0	0	0	0	0	0	0.4	0.5	1.9	0.4	0.1	0	0.1	0	0	0	0
AgE34	55698	74408	AgE34_g004_t01	-	15507	6	RecName: Full=Cytochrome b; AltName: Full=Complex III subunit 3; AltName: Full=Complex III subunit III; AltName: Full=Cytochrome b-c1 complex subunit 3; AltName: Full=Ubiquinol-cytochrome-c reductase complex cytochrome b subunit			1	1.1	0.3	0.1	0.1	0.5	0.2	0.2	0.1	0.1	0.2	0.2	0.1	0.1	1.5	1.7	2	0.5	0.2	0.2	0.2	0.2	0	0	0.1
AgE35	2766	6536	AgE35_g001_t01	-	805	5	hypothetical protein			3	1	0	0	1.1	2.9	1	0.6	0	0	0.5	0.1	0.5	0.4	2.4	0.6	0.5	0.4	0.1	0.1	0.3	0	0.1	0	0
AgE35	12433	13935	AgE35_g002_t01	-	393	3	hypothetical protein			2.3	0.5	0	0	0.1	1.3	0.2	0.4	0	0	0.4	1.1	0.4	0.2	2.4	0.6	0.4	0.3	0	0	0.1	0	0	0	0
AgE35	14332	21708	AgE35_g003_t03	-	2860	3	LINE-1 reverse transcriptase			7	0.7	0.1	0	0.7	3.7	0.7	0.6	0.2	0.4	1	0.4	0.4	0.9	3.7	2.6	2.3	1.5	0.3	0.2	0.5	0	0.2	0.1	0
AgE35	14698	34268	AgE35_g004_t01	+	5522	3	hypothetical protein			5.1	0.6	0.1	0	0.6	2.5	0.6	0.4	0.1	1	2.6	2	1.3	1.5	6.6	2.4	1.3	0.8	0.2	0.2	0.3	0	0.2	0.1	0
AgE35	25330	29661	AgE35_g005_t01	-	1733	8	zinc c2h2 type family protein	PgB28_g015_t01,PgE157_g001_t01,PgE044_g003_t01,PgE272_g001_t01		4.3	0.7	0.2	0	0	4.7	1.5	1.4	0.2	0	0.1	0.1	0.3	0	0	0	0	0	0	0	0	0	0	0	0
AgE35	60252	67673	AgE35_g006_t02	+	1213	5	protein ariadne-1	PgE036_g002_t02,PgE090_g002_t01,PgE090_g001_t01	MSTRG.19200.2	31.5	34.2	16.1	0.3	3.4	27.3	12.4	11.9	1.5	6.3	26.4	33.3	29.9	36.7	67.7	79.7	44	5.7	1.1	0.8	0.6	0	0.8	1.4	0
AgE36	226	5816	AgE36_g001_t03	-	1355	4	hypothetical protein			6	2.3	2.8	0.1	2	45.7	14.5	15	4	4.8	11.6	11.4	9.2	9	6.7	3.4	1.5	0.4	0.3	0.3	0.4	1.3	2.9	0.9	0
AgE36	6456	10525	AgE36_g002_t01	+	651	6	Lactoylglutathione lyase, partial			83.8	20.1	25.8	32.8	27.3	77.1	56.8	58.7	61.4	44.6	80.4	82.1	74.9	106.4	85.2	196.3	133.5	173	115.8	69.5	45.1	47.8	139.9	141.5	177.6
AgE36	16686	18737	AgE36_g003_t01	+	169	2	Poly(A) RNA polymerase gld-2			23.2	22.5	2.4	0.2	1.7	34.6	25.1	22.8	0	0.5	2.7	3.7	3.4	4	1.5	1.3	2.9	0.2	0	0.2	0	0	0.2	0	0
AgE36	20904	42576	AgE36_g004_t05	+	3742	19	Poly(A) RNA polymerase gld-2	PgB08_g098_t01,PgB08_g098_t01,PgB04_g196_t01,PgB04_g196_t01	MSTRG.18398.1,MSTRG.18398.1,MSTRG.23204.6,MSTRG.22503.1	48.2	49.1	5.3	0.3	6.9	58.6	31.9	33.9	7.5	4.7	13.1	15.5	18	14.2	8.9	8.7	7.6	0.8	0.3	0.2	0.6	0.5	1	0.4	0
AgE37	7279	14441	AgE37_g001_t03	+	711	5	227 kDa spindle- and centromere-associated protein			31	118.9	12	0.2	3.2	36.3	14.9	15.4	5.6	1.1	3.9	3.5	4.3	6.1	8.7	9.9	12.9	1.7	0.5	0.2	0.4	0	0.2	0.1	0
AgE37	22322	41243	AgE37_g002_t04	+	1191	10	Baculoviral IAP repeat-containing protein 6			42.9	137.2	14	1.2	4.5	40.4	14.2	17.8	3.3	1.2	4.7	8	4.8	10.3	13.4	14.1	12.2	4	2.5	3.1	2.3	1.5	0.5	0.7	0.9
AgE37	50756	67699	AgE37_g003_t01	+	718	3	FACT complex subunit SSRP1-A			16	49	3.7	0.1	0.7	12	8.4	8.8	3.5	6.2	26	31.2	20.2	19.5	38.2	41.8	46	4.6	1.2	1.1	1.2	0	1.1	0.3	0.1
AgE37	57222	58984	AgE37_g004_t01	.	1763	1	hypothetical protein			11.7	32.8	1.6	0	0.7	4.2	2.6	2.4	0.3	0.1	0.9	2	2	1.7	13.4	14.5	7.8	1.7	0.2	0.3	0.5	0	0.2	0.1	0
AgE38	28338	30507	AgE38_g001_t04	+	673	4	E3 ubiquitin-protein ligase HUWE1			241.2	177.8	23.5	3.4	30.6	672.1	178.7	197.6	14.8	3.3	6.5	9.4	12.3	16.7	49.6	44.7	48.2	17.7	9.4	10	6.6	5.1	3.2	2	2.8
AgE38	22408	33508	AgE38_g002_t03	+	2280	5	E3 ubiquitin-protein ligase HUWE1			200.5	156.3	20.4	1.8	22.2	414	126.7	138.4	7.5	1.8	3.9	7	9	8.7	26.7	22	26.7	8.2	5.6	4.8	3.2	2.3	1.2	0.9	1.4
AgE38	54619	62974	AgE38_g003_t03	-	4677	4	Transposon-derived protein		MSTRG.20497.1	6.2	9.6	2.4	0	1.1	0.7	0.9	0.6	0.5	0.5	1.9	1.9	1.1	1.1	1.6	1.6	1.1	0.4	0.1	0.1	0.2	0	0.1	0.1	0
AgE38	64375	64713	AgE38_g004_t01	+	339	1	hypothetical protein			0.3	0.4	0	0	0	0	0	0	0	0.3	0.1	0.2	1.1	0.3	0.9	0	0	0	0.1	0	0	0	0	0	0
AgE39	27703	30777	AgE39_g001_t22	-	988	3	hypothetical protein			32.8	15.2	2.2	0	2.4	16.2	9.9	14.2	4	10.5	47.4	43.5	75.5	38	33.5	41.3	26.1	2.1	0.8	0.9	1.6	0	1.3	0.1	0
AgE39	49236	50138	AgE39_g002_t01	.	903	1	hypothetical protein			0.2	0	0	0	0.1	0	0	0	0	0	4.2	4.4	0.6	0.5	0.2	0	0	0	0	0	0	0	0	0	0
AgE39	52852	54195	AgE39_g003_t01	.	1344	1	hypothetical protein			0.2	0	0	0	0.2	0.1	0	0	0	0	3.4	3.5	1.3	0.6	0.1	0.1	0	0	0	0.2	0.4	0	0	0	0
AgE39	56091	56764	AgE39_g004_t01	.	674	1	hypothetical protein			0.1	0	0.1	0	0.1	0.1	0	0	0	0	0.5	0.2	0.2	0.1	0	0.1	0	0.1	0	0.1	0.9	0	0	0	0
AgE39	60020	60427	AgE39_g005_t01	.	408	1	hypothetical protein			0.5	0.2	0	0	0.4	0.2	0	0.1	0	0	0.7	0.5	0.4	0.5	0.1	0	0	0.1	0	0	0.3	0	0	0	0
AgE40	28318	58020	AgE40_g001_t02	-	2050	5	hypothetical protein			8.8	8.3	0.7	0.1	0.4	4	7.4	6.8	2.6	9	36.2	28.1	10.5	11.2	5.2	1.5	0.5	0.1	0.1	0.3	0.1	0	0.7	0.2	0.1
AgE40	35259	38710	AgE40_g002_t03	+	3452	1	hypothetical protein	PgE272_g001_t01		3	6.2	0.6	0	0.1	0.4	0.2	0.2	0	0	0.1	0	0	0	0.3	0.1	0.2	0	0	0	0	0	0.1	0	0.1
AgE40	60999	69194	AgE40_g003_t01	-	6416	2	hypothetical protein			1.6	3.7	0.4	0	0.1	0.1	0.1	0.1	0	0	0	0	0	0	0.1	0.1	0	0	0	0	0	0	0	0	0
AgE40	61804	70109	AgE40_g004_t03	+	841	5	hypothetical protein	PgE004_g002_t03	MSTRG.22256.2	5.5	18.6	1.6	0	0.4	0	0	0	0	0.3	0.2	0.7	0.5	0.6	1.5	0.9	0.2	0	0	0	0.1	0	0.1	0	0.1
AgE41	2321	3488	AgE41_g001_t01	-	314	2	solute carrier family 12 member 8			0	0	0	0	0	0	0	0	0	0.1	0	0.2	0	0.7	0.5	0	0	0	0	0	5	0	0	0	0
AgE41	19963	23382	AgE41_g002_t01	-	333	4	Structural maintenance of chromosomes protein 1A	PgE198_g001_t03,PgE208_g001_t08		15.2	10.8	0.9	0.1	3.9	20.8	7.1	7.5	1.7	2.5	6.1	8.3	8.1	7.1	13.5	20.4	16.4	7.1	0.5	1.6	0.7	5.2	0.3	0.3	0
AgE41	40288	49462	AgE41_g003_t06	-	652	6	hypothetical protein	PgB33_g008_t02	MSTRG.18742.2	9.8	76.6	36.2	0.6	2.7	2.5	1.5	1.7	0.8	0.1	1	1.4	5.2	5.9	5.1	3.5	1.9	0.6	0.1	0.1	0.3	0	0.8	0.1	0.1
AgE41	60143	64419	AgE41_g004_t01	+	492	5	hypothetical protein	PgB46_g002_t01,PgB19_g040_t01	MSTRG.21614.1	0.4	0.5	0.1	0	0	0.1	0	0	0.4	0	0	0	0	0.1	0	0.2	0.1	0	0	0	0	0	0	0	0
AgE42	17	11555	AgE42_g001_t02	+	1514	11	hypothetical protein			21.1	82.4	12.6	0.3	1.9	0.3	0	0.1	0	0.1	0.1	0.1	0	0	0.1	0.2	0.1	0	0	0	0	0	0.1	0	0
AgE42	1859	7329	AgE42_g002_t01	-	528	3	hypothetical protein			4.9	17.6	3.9	0	1	1.5	0.2	0.4	0	0	1.2	0.7	0.2	0.6	0.8	0.4	0.3	0.1	0	0	0.1	0	0.1	0	0.1
AgE42	13325	21259	AgE42_g003_t02	-	4846	4	eh domain-binding protein 1			3.1	1.1	1.7	1.2	1.5	3.7	2.6	2.7	3.3	2.4	3.8	4.1	4.1	3.8	8.8	12.3	7.5	3.6	2.7	2.7	2	2.5	0.8	0.5	0.3
AgE42	31731	33440	AgE42_g004_t01	+	146	3	hypothetical protein			10.1	5.6	1.8	0	2.4	26.2	10.2	9.8	3	0.3	5.8	5	4.3	7.2	25.6	16.1	37.4	4.1	0.9	0	0.6	0	0.2	0	0
AgE42	38347	51636	AgE42_g005_t01	+	1277	8	Titin			130.2	26.3	7.4	0.4	25.5	65.3	26.4	28.3	18.4	2.7	9	19	32.5	29.9	100.1	112.5	191.7	34.3	10.9	8.7	11.2	2.7	0.6	0.2	0.4
AgE42	59639	65840	AgE42_g006_t03	+	1430	4	tyrosine-protein phosphatase lar-like protein			10.8	23.9	1.6	0.1	0.2	2.2	1.5	1.8	0.1	0	0.9	0.9	0.6	1.2	4.3	5.1	8.5	1.1	0.3	0.1	0.2	0	0.2	0.1	0
AgE43	1	21452	AgE43_g001_t02	+	5051	8	structural maintenance of chromosomes protein 1a	PgE235_g001_t03,PgE229_g001_t01,PgE027_g003_t01	MSTRG.2302.2,MSTRG.2302.2	11.6	8	1	0	3	12.6	6.7	6.4	2.4	4.1	11.5	12.1	12.8	13.2	32.4	48.5	40.3	9.4	2.4	2.7	3.1	0.7	1.3	0.6	0
AgE44	1033	24783	AgE44_g001_t02	-	2384	18	hypothetical protein	PgE030_g005_t06,PgE304_g001_t03,PgE137_g003_t02	MSTRG.22607.2,MSTRG.22621.1	10.9	32.5	3.6	0.2	0.5	0	0	0	0	0	0.3	0.3	0.5	0.3	0.6	0.2	0	0	0	0	0	0	0.1	0	0
AgE44	28107	35998	AgE44_g002_t01	-	1351	5	hypothetical protein	PgE148_g001_t01	MSTRG.23377.1,MSTRG.23377.1	77.9	77.6	8.2	0.3	3.1	0.1	0.1	0	0	0.1	0.2	0.3	0.2	0.1	0.1	0	0.1	0	0	0	0	0	0.3	0	0.2
AgE44	45556	47641	AgE44_g003_t02	-	534	2	hypothetical protein			0.6	0.3	0.2	0	2.3	0	0	0	0	0.6	1.3	1	0	0.6	0.3	0.6	0.1	0	0	0	0.3	0	248.3	330.2	0
AgE45	1936	6546	AgE45_g001_t01	-	630	5	immunoglobulin i-set domain containing protein		MSTRG.22120.1,MSTRG.22312.3,MSTRG.22312.3	0.3	0.1	0	0	0	0.2	0	0	0	0	0.3	0	0	0.3	0.2	0.4	0.1	0	0	0	0	0	0	0	0
AgE45	12544	14559	AgE45_g002_t01	-	1804	2	hypothetical protein			13.8	9.1	1.2	0	0.1	0	0	0	0.1	0	0.4	0.8	1.4	0.8	1.6	0.7	1.5	0.2	0.1	0.3	0.3	0	0	0	0
AgE45	25069	29549	AgE45_g003_t01	-	531	5	hypothetical protein			0.1	0	0	0	0	0.1	0	0	0	0	0	0	0	0.1	0.1	0	0	0	0	0	0	0	0	0	0
AgE45	30626	47691	AgE45_g004_t04	+	2867	8	40s ribosomal protein s2	PgE024_g001_t01,PgE007_g004_t01	MSTRG.22817.6	27.5	6.6	0.8	0.1	3.1	11.8	7.7	6.7	0.2	2.5	13.3	12.6	12.4	10.4	19.6	17	9.8	1.9	0.6	0.4	0.5	1.8	0.9	1.4	0.2
AgE46	625	2051	AgE46_g001_t01	+	621	2	Tyrosine-protein kinase Fer			21.6	36.5	4.9	0.1	0.6	0.4	0.2	0.3	0.4	0	1.1	0.4	0.7	1.3	3.4	4.1	2.5	0.5	0.1	0.1	0.3	0	0.4	0	0
AgE46	9509	18467	AgE46_g002_t05	-	1191	7	protein spinster-like protein 1	PgE167_g002_t01,PgE083_g001_t09	MSTRG.20604.1,MSTRG.2306.1,MSTRG.20603.6,MSTRG.20603.6,MSTRG.22067.1	52.3	131.7	11.2	0.3	2.5	0.1	0	0.1	0	0.1	0.6	1.8	2	2.2	2.3	1.8	0.5	0.1	0	0	0.1	0	0.3	0	0
AgE46	28671	51320	AgE46_g003_t05	+	3054	21	Myosin-VI	PgE099_g001_t07	MSTRG.17952.4	58.5	473.7	89	0.8	9.7	1	1.3	1.2	0.3	0.6	1.3	0.9	1.5	0.8	1	1.2	0.4	0	0	0	0.2	0	1.3	0	0.1
AgE46	53439	61384	AgE46_g004_t01	+	3651	3	hypothetical protein	PgE114_g002_t01	MSTRG.21662.1,MSTRG.21661.2	3.5	18.9	6.6	0.1	1.1	0.1	0.2	0.2	0.2	0	0.4	0.6	0.9	0.3	0.3	0.3	0.2	0	0	0	0	0	0.1	0	0
AgE47	260	3201	AgE47_g001_t02	+	1772	4	zinc c2h2 type family protein	PgE272_g001_t01,PgB28_g015_t01,PgE044_g003_t01		0.5	0.2	0	0	0	0.6	0.1	0.2	0.1	0	0.3	0	0.2	0.1	0.9	0.2	0	0.1	0	0	0	0	0	0	0
AgE47	9527	9766	AgE47_g002_t01	-	240	1	hypothetical protein			0.6	1.8	0	0	0	0	0	0	0	0	0.2	0	0	0.2	0.2	0.5	0.9	0	0	0	0	0	0	0	0
AgE47	10141	20390	AgE47_g003_t06	-	2364	10	Glycogen synthase kinase-3 beta	PgE028_g001_t03,PgB02X_g220_t02,PgE022_g006_t02,PgE028_g002_t01,PgE126_g003_t01,PgB02X_g221_t01,PgE025_g001_t01,PgE222_g001_t02,PgB25_g019_t01,PgE348_g001_t01,PgB37_g005_t03,PgB10_g103_t01,PgE056_g003_t06	MSTRG.16870.5,MSTRG.21423.2,MSTRG.21893.3,MSTRG.7017.1,MSTRG.23672.1,MSTRG.16581.1,MSTRG.20803.1,MSTRG.20937.1,MSTRG.20937.1,MSTRG.21941.1,MSTRG.20409.5,MSTRG.20625.12,MSTRG.22069.3,MSTRG.23443.1,MSTRG.17933.1,MSTRG.23332.3,MSTRG.22241.1,MSTRG.21745.1,MSTRG.20938.1,MSTRG.23400.4	59.6	51.7	5.7	0.4	5	5.3	5.6	5	2	1.3	5.2	5.3	4	4.8	4.3	2.6	0.9	0.1	0	0	0.1	0	0.4	0	0
AgE47	21884	25504	AgE47_g004_t01	+	2440	3	hypothetical protein			30.3	20.9	2.5	0.3	0.8	0.3	0.4	0.3	0	1.1	4.5	7.8	6.5	4.9	9.5	5.5	1.9	0.3	0.1	0.1	0.1	0	0.2	0	0.1
AgE47	23607	57088	AgE47_g005_t02	-	2668	7	hypothetical protein	PgE006_g001_t01		40.8	27.9	2.9	0.1	0.7	0.2	0.1	0.1	0.1	0.1	0.6	1	1.9	1.7	2.3	1.8	1.9	0.2	0.1	0.1	0.1	0	0.1	0	0.1
AgE47	33603	45895	AgE47_g006_t02	-	1566	12	ATP-binding cassette sub-family E member 1	PgE071_g001_t04	MSTRG.23077.1,MSTRG.23159.1,MSTRG.22962.1,MSTRG.22207.1	22.2	63.4	5.7	0.2	1.6	0.5	0.2	0.2	0.3	0.3	0.4	0.4	0.3	0.4	1.1	1.4	0.4	1.9	1.3	1.1	0.9	1.1	1.5	1.3	1
AgE47	47577	57088	AgE47_g007_t01	.	9512	1	eukaryotic translation initiation factor 2 subunit 2	PgE006_g001_t01		17.8	14.2	1.4	0	0.2	0.1	0.1	0.1	0	0	0.5	0.5	1	1	0.9	0.9	1.1	0.1	0	0	0	0	0	0	0
AgE48	11049	12557	AgE48_g001_t01	+	498	3	hypothetical protein			0.4	0	0	0	0	0.1	0	0	0	0	0	0	0	0	0	0	0	0	0	0	0.1	0	0	0	0
AgE48	25424	27979	AgE48_g002_t01	-	354	2	Protein transport protein Sec24B		MSTRG.20977.3	0.3	0.1	0.1	0	0	1	0.7	0.7	0	0.2	0.7	2.1	1.5	2.8	3.7	1.9	0.3	0.2	0	0	0	0	0	0	0
AgE48	28031	28342	AgE48_g003_t01	-	312	1	hypothetical protein	PgE295_g001_t02		0	0	0	0	0	0	0	0	0	0	0	0	0	0	0	0	0	0	0	0.1	0	0	0	0	0
AgE48	30752	31792	AgE48_g004_t01	-	1041	1	hypothetical protein			0	0.1	0	0	0	0.1	0	0	0	0	0	0	0.1	0	0	0	0.2	0	0	0	0	0	0	0	0
AgE48	31917	32285	AgE48_g005_t01	-	369	1	hypothetical protein			2.2	1.1	0	0	0.1	1.1	0.5	0.2	0	0	0.2	0	0.4	0.1	0	0	0	0	0	0	0	0	0.1	0	0
AgE48	36465	40998	AgE48_g006_t04	+	1514	3	hypothetical protein		MSTRG.22222.6	5.3	5.6	0.8	0	0.6	0.9	1.3	0.8	0.2	5.4	29.7	43.1	28.3	17.8	22.5	15.5	6.7	0.9	0	0.1	0.3	0	0.9	0.1	0
AgE48	53382	55930	AgE48_g007_t01	+	966	3	hypothetical protein			4.6	4.5	0.5	0	1.3	1.9	0.9	1.3	1	1.6	3.5	2.9	3.3	2.8	8.4	9.3	8	1.4	0.8	0.5	0.4	0	0.3	0	0
AgE49	888	1390	AgE49_g001_t01	.	503	1	hypothetical protein			1.8	2.5	0.2	0	0	0	0.1	0.2	0	0	0.1	0	0.4	0.2	0	0.4	0	0	0	0	0.1	0	0	0	0
AgE49	1941	3417	AgE49_g002_t01	-	1477	1	hypothetical protein			7.7	21	1	0	0.4	0.3	0.1	0.2	0.3	0.1	0.5	0.3	0.4	2.1	8.5	7	2.7	1.8	0.8	0.6	0.8	0	0.2	0	0
AgE49	3548	37261	AgE49_g003_t01	-	6215	12	Eukaryotic translation initiation factor 4E-3	PgB39_g003_t18,PgB39_g004_t03	MSTRG.22781.1,MSTRG.22781.1,MSTRG.24100.1,MSTRG.17750.4	28.6	88.6	6.4	0.1	1.4	1.8	1.1	1.1	0.7	0.8	3.7	5.7	12	7.6	20.1	21.1	29	4.7	1.2	1.2	1.4	0.3	0.5	0.2	0
AgE49	19828	30427	AgE49_g004_t03	+	6815	5	Eukaryotic translation initiation factor 4E-3	PgB39_g005_t05	MSTRG.22357.1,MSTRG.21612.1,MSTRG.20896.2,MSTRG.23291.1,MSTRG.22072.2	19.2	12.2	1.2	0.1	1.6	2.6	1.9	1.9	0.4	0.7	3.3	4.9	6.4	4.4	12.2	10.8	14.6	2	0.6	0.5	0.5	0	0.3	0.2	0
AgE49	43980	56732	AgE49_g005_t02	-	1282	10	Long-chain-fatty-acid--CoA ligase 5			17.7	8.1	1.1	0.1	2	75.8	38.6	42.4	5.9	4.9	5.5	7.4	6.5	9	8.8	13.1	6.7	2.3	0.8	0.5	0.7	0	0.9	1.3	0
AgE50	8361	8964	AgE50_g001_t01	+	207	2	zinc c2h2 type family protein			1.3	0.5	0	0.1	0	0.3	0.3	0.6	0	0	0	0	0	0.2	0	0	0	0.5	0	0	0	0	0	0	0
AgE50	10487	10851	AgE50_g002_t01	.	365	1	hypothetical protein			1.6	0.5	0	0	0	0.4	0	0.2	0	0	0	0	0	0.1	0	0	0	0	0	0.2	0.1	0	0	0	0
AgE50	23493	36828	AgE50_g003_t03	+	1112	7	Protein FAM69C	PgE042_g005_t01	MSTRG.20611.7,MSTRG.20405.2,MSTRG.20405.2	35.5	6.4	3	0.3	15.4	70.4	76.2	69.2	17	11.5	64.5	60.1	43.2	74.7	46.7	31	10.6	1.6	0.1	0.5	0.5	0	2.5	0.8	0
AgE51	2024	22173	AgE51_g001_t01	+	4877	7	Kelch-like protein 10, partial	PgE019_g002_t05,PgE019_g002_t05	MSTRG.10150.8,MSTRG.20493.2,MSTRG.20493.2,MSTRG.20493.2	6	21.9	7	0	0.7	1.7	1	1.1	0.3	0.4	3.9	3.4	2.1	5	5.9	4.1	2.6	0.6	0.3	0.2	0.3	0.4	0.4	0.1	0
AgE51	12234	31537	AgE51_g002_t01	-	8493	3	Kelch-like protein 10		MSTRG.23079.1,MSTRG.20492.1,MSTRG.18248.2,MSTRG.23112.1	3.7	9.8	1.8	0	0.3	0.9	0.7	0.7	0.1	0.5	3.6	4.9	2.1	4.4	4.3	2.6	0.9	0.2	0	0	0.1	0	0.1	0	0
AgE52	2723	7477	AgE52_g001_t02	-	1148	5	hypothetical protein	PgB33_g009_t07	MSTRG.21336.1	14.6	57.4	13.7	0.1	1.2	5.6	8.8	8.3	5.4	9.6	19.9	14.9	7.6	18.6	5.2	3.5	0.9	0.3	0	0.2	0.2	0	1.2	0.2	0.1
AgE52	8774	17929	AgE52_g002_t02	-	3045	5	hypothetical protein	PgB33_g008_t02	MSTRG.18742.2,MSTRG.20447.1,MSTRG.20447.1	6.6	39.7	14.5	0.3	3	0.7	0.6	0.3	0.2	0.3	1.1	0.7	0.9	1.4	1.5	1.7	0.7	0.2	0.1	0.1	0.1	0	0.3	0	0.2
AgE52	30079	45143	AgE52_g003_t02	-	781	6	hypothetical protein		MSTRG.20893.1	5	5.6	0.5	0.1	1.7	9.4	6	5.6	2	2.3	8.3	8.1	9.2	16.8	16.2	18.9	12	2.3	0.5	0.5	0.7	0	2.4	1.6	0.3
AgE52	36581	45143	AgE52_g004_t02	+	3444	10	hypothetical protein	PgB46_g002_t01,PgB46_g002_t01,PgB19_g040_t01,PgB19_g040_t01	MSTRG.21614.1	3.4	13.5	1.4	0.1	1.6	0.4	0.1	0.2	0	0.2	1	1.7	0.8	1.6	1.3	1.4	1.3	0.3	0.1	0.1	0.1	0	0.5	0.4	0.2
AgE52	46702	52197	AgE52_g005_t02	+	1038	7	Major sperm protein			11.2	129.8	37.1	0.7	3.5	0	0.1	0	0.2	0.2	0	0.5	1.1	0.4	0.1	0.3	0	0	0	0.1	0.1	0	0.2	0	0
AgE53	1518	1829	AgE53_g001_t01	+	312	1	protein-like protein 4			2.1	0.4	0	0	0	0.4	0.1	0	0	0	0	0	0	0	0	0.1	0	0	0	0	0	0	0	0	0
AgE53	4018	11986	AgE53_g002_t01	-	996	8	hypothetical protein			0	0	0	0	0	0	0	0	0	0	0	0	0	0	0.1	0	0	0	0	0	0	0	0	0	0
AgE53	12885	14362	AgE53_g003_t01	-	246	2	hypothetical protein			0	0	0	0	0	0	0	0	0	0	0	0	0	0	0	0	0	0	0	0	0	0	0	0.1	0
AgE53	22287	37950	AgE53_g004_t05	+	1915	12	Metal transporter CNNM4, partial	PgE100_g003_t03	MSTRG.20410.7,MSTRG.20410.7,MSTRG.20410.7,MSTRG.20410.7	17.3	66	6.3	0.1	0.8	0	0	0	0.1	0	0.1	0.1	0	0.2	0.7	0.3	0	0	0	0	0.1	0	0.1	0	0
AgE53	41818	50320	AgE53_g005_t01	-	6568	2	Metal transporter CNNM4, partial			3.6	8.6	1.4	0	0.3	0	0	0	0	0	0.2	0.2	0.2	0.1	0.3	0.1	0	0	0	0	0	0	0	0	0
AgE54	2	1679	AgE54_g001_t01	.	1678	1	hypothetical protein			6	4.9	2.5	0.4	0.6	2	0.8	0.7	1.7	3.2	0.9	0.7	0.8	1.4	6.2	2.7	1.6	6.1	11.6	21.4	12.6	13.4	0.8	0.9	6.8
AgE54	2747	11337	AgE54_g002_t04	-	2346	5	Zinc finger CCCH domain-containing protein 10			10.1	4	1.8	0.9	1.7	7.7	2.7	2.9	1.8	3.1	2.9	2.7	3.5	2.9	7.5	7.4	15.6	27.1	35.2	40.6	16.6	22.1	2	1.1	6.5
AgE54	19322	40552	AgE54_g003_t03	+	1739	11	proteophosphoglycan ppg4			19.8	2.4	0.9	0.1	10.7	65.9	30.2	35.3	8.2	5.9	29.9	31.3	40	27.1	21.6	34.9	32.3	5.2	0.7	1.1	1.2	0	1.4	0.7	0
AgE54	42462	46116	AgE54_g004_t03	+	594	5	proteophosphoglycan ppg4			24	1.5	1.4	0	10.4	64	52.2	48.2	5.2	4.7	19.1	30.1	65.1	13.9	19.6	33.8	85.2	3.5	0.6	1	0.4	0	1.6	0.3	0
AgE55	4252	15050	AgE55_g001_t03	-	3145	8	hypothetical protein			10.3	26.6	2.1	0.1	0.8	0.2	0.5	0.2	0.1	0	0.4	0.6	0.4	0.6	1.2	0.5	0.3	0.3	0	0.2	0.2	0	0.1	0	0.1
AgE56	1946	11419	AgE56_g001_t05	-	1365	9	Malate dehydrogenase		MSTRG.23647.1,MSTRG.22203.1	101.1	138.5	15.4	1	5.1	11.4	16.7	14.7	4.6	6	63.5	57.1	37.5	54.7	30.1	26.9	10.3	1.5	0.4	0.3	0.2	0	1.8	0.9	0.3
AgE56	11144	24183	AgE56_g002_t01	+	6385	5	hypothetical protein	PgE025_g003_t01	MSTRG.23175.1	7.4	12.1	1.1	0.1	0.3	0.1	0	0	0	0.1	0.1	0.2	0.2	0.1	0.2	0.1	0.1	0.1	0	0.1	0.1	0.3	0.1	0	0.1
AgE56	25759	35115	AgE56_g003_t05	-	523	7	hypothetical protein	PgE043_g003_t01,PgE068_g003_t01	MSTRG.23522.1,MSTRG.24281.1	187.2	924.2	598	9.2	67.7	2.9	3.3	2.9	1.7	3.2	24.8	27.2	16.5	7.6	3.8	2.7	1.8	0.1	0	0.1	0.6	0	3.1	0.2	2.9
AgE56	36125	36884	AgE56_g004_t01	.	760	1	hypothetical protein			0.2	0.6	0.5	1.1	0.9	0.3	0.3	0.5	0.6	0.5	10	21.6	26.4	2.3	2.4	0.9	0.6	0.3	0.5	1	0.6	0	5	4.2	0.3
AgE57	5851	21901	AgE57_g001_t04	+	3664	14	Tau-tubulin kinase 2	PgE232_g001_t04,PgB10_g103_t01,PgB25_g018_t01,PgE078_g001_t01,PgE021_g005_t04,PgB22_g041_t04,PgE397_g001_t01,PgE149_g003_t02,PgE156_g001_t11,PgE111_g002_t03	MSTRG.18753.1,MSTRG.18388.5,MSTRG.21655.5,MSTRG.21655.5,MSTRG.21655.5,MSTRG.22718.1,MSTRG.21667.1,MSTRG.23846.1,MSTRG.22167.7,MSTRG.13368.2,MSTRG.23052.1,MSTRG.22673.1,MSTRG.20782.13,MSTRG.20782.13,MSTRG.19589.1,MSTRG.13365.1,MSTRG.21747.2,MSTRG.20353.1,MSTRG.17769.3,MSTRG.20059.1,MSTRG.16874.1,MSTRG.21745.1,MSTRG.22376.1,MSTRG.23426.4,MSTRG.22403.2,MSTRG.21615.1,MSTRG.17766.1	30.5	161.2	59.9	0.7	7.1	0.2	0.1	0	0.1	0.2	0.7	0.5	1.1	1.1	6.6	9	5.1	1	0.2	0.1	0.1	0	0.6	0	0.2
AgE57	24495	33890	AgE57_g002_t04	-	5499	3	hypothetical protein			2.1	4	0.8	0.1	0.1	0.1	0.1	0	0.1	3.1	0.6	0.5	1.1	0.5	1.1	0.7	1.1	1.2	1.6	0.9	1.1	22.9	1.3	1	0.9
AgE57	33979	36969	AgE57_g003_t02	+	1783	2	hypothetical protein			1.3	4.5	0.1	0	0.1	0.1	0.1	0	0	0	0.3	0.1	0.1	0.2	0.3	0.3	0	0	0.1	0.1	0	0	0	0	0
AgE58	8432	13852	AgE58_g001_t04	+	745	6	pyruvate dehydrogenase e1 component subunit alpha type			4.2	25	2.4	0.5	0.3	0	0	0	0	0	0.2	0.1	0.4	0	0.1	0.1	0	0	0	0	0	0	0.1	0	0
AgE58	13348	21081	AgE58_g002_t03	-	1856	11	pyruvate dehydrogenase e1 component subunit alpha type	PgE097_g003_t02	MSTRG.22986.5,MSTRG.22986.5,MSTRG.20609.1,MSTRG.22714.1	666.6	2234.3	1132.5	14.3	118.7	5.2	6	4	4.7	3	2.5	2.9	3.3	2.6	6.8	9	3.4	0.7	0.1	0.1	0.6	0	6.5	0.2	3.1
AgE58	22650	44388	AgE58_g003_t06	-	3003	15	bromodomain associated family protein	PgE097_g001_t04	MSTRG.20537.7,MSTRG.20537.7,MSTRG.23413.3,MSTRG.22392.9,MSTRG.20607.2,MSTRG.20532.2	24.6	5.1	1.4	0.1	7.7	48	20.3	20.8	3.1	1.9	11.6	16.1	10.1	12.8	9.8	5.2	1.2	0.1	0.1	0.1	0.2	0	0.5	0.2	0
AgE59	16	22539	AgE59_g001_t09	-	1863	13	hypothetical protein	PgB44_g001_t11,PgE519_g001_t02,PgE519_g002_t01	MSTRG.21073.4,MSTRG.21073.4,MSTRG.21073.4,MSTRG.20001.2	13.5	95	8.2	0.1	3.5	1.7	1	1.1	0.5	0.4	2.9	2.5	3.2	5.9	10.3	9.2	4	0.8	0.3	0.5	0.4	1.9	0.3	0	0
AgE60	8963	40537	AgE60_g001_t08	-	1955	9	phosphatidylinositol n-acetylglucosaminyltransferase subunit p			10.5	0.7	2.8	0.4	5.1	54.8	30.8	33.3	6.4	2.2	5.9	10	13.1	14.8	44.1	65.6	51.6	18	10.2	8.4	9.1	5.3	1.2	1.3	0.6
AgE61	4516	5067	AgE61_g001_t01	.	552	1	hypothetical protein			3.3	0.5	0	0	0.1	3.4	2.7	2.1	0	0	0.5	0.9	1	0.3	6.4	3.2	2.8	1.2	0.4	0.1	0.6	0	0	0	0
AgE61	14626	24425	AgE61_g002_t04	-	2144	9	horma domain-containing protein 1			24.3	2.3	0.3	0	2.7	23.9	15.6	15.4	7.1	8.3	51.3	32.7	27.8	48.6	53.2	46.2	17.1	5.3	1.1	1.2	2.4	0	2.3	0.9	0
AgE61	27942	34025	AgE61_g003_t01	-	4137	4	Poly(A) RNA polymerase gld-2	PgB08_g098_t01,PgB04_g196_t01	MSTRG.18398.1,MSTRG.22503.1	7.6	7.3	0.6	0.1	1	5.8	4.1	3.4	1.4	2.9	13.7	9.8	8.1	7.7	19.3	14.5	14.4	1.9	0.4	0.4	0.5	0	0.8	0.6	0
AgE62	6566	16102	AgE62_g001_t10	+	2201	11	phosphatidylcholine:ceramide cholinephosphotransferase 3			9.4	0.6	1.3	0.8	4	48.2	58.1	58.2	12.7	13.3	47.5	40.2	45.2	51.7	44.4	45.8	34	27	21.2	17.3	7.9	3.1	3.5	0.8	1.8
AgE62	17375	20855	AgE62_g002_t01	-	3431	2	S-antigen protein			1	0	0	0	0.1	1.2	2.4	2.2	0.1	0	0	0.1	0.6	0.1	0.2	0.2	0.6	0.1	0.1	0.2	0.4	0	0	0	0
AgE62	28512	34115	AgE62_g003_t07	-	1697	7	hypothetical protein			1.5	0.2	0.8	0.1	0.3	20.8	42.8	40	10.7	3	8.6	11.8	15.7	18.8	8.7	9.2	9.1	4.1	0.8	3	8.5	0	0.4	0.4	0.1
AgE63	1266	1994	AgE63_g001_t01	.	729	1	hypothetical protein			2.1	1.6	0.3	0	0	1.2	1.5	1.2	0	0.2	0.6	0.1	1.5	0.5	3.7	2.5	1.6	0.7	0.3	0.1	0.5	0	0	0	0.1
AgE63	2817	3117	AgE63_g002_t01	.	301	1	hypothetical protein			0.5	0.5	0	0	0.7	0.2	0.5	0.6	0	0	0	0	0	0	0.7	0.1	1.3	0.1	0	0	0	0	0	0	0
AgE63	6264	7704	AgE63_g003_t01	-	442	3	p40		MSTRG.22412.1,MSTRG.22406.1,MSTRG.20646.1	37.5	51.8	7.9	0.3	2.3	1.1	0.3	0.8	0	0	0.6	0.6	1.4	0.9	2.2	2.2	1.6	0.3	0.3	0	0.1	0	0.1	0	0.1
AgE63	16360	30605	AgE63_g004_t06	-	1402	10	Tyrosine-protein kinase Fer	PgB37_g005_t03,PgE056_g003_t06,PgE088_g002_t01,PgB25_g019_t01	MSTRG.21580.2,MSTRG.7427.1,MSTRG.23400.4,MSTRG.19994.2,MSTRG.23443.1,MSTRG.23125.4,MSTRG.23481.2,MSTRG.17933.1,MSTRG.19573.8	43	102.2	12.8	0.2	1.7	2.5	4.6	4	1.6	0.9	4.8	7.2	4.6	3.4	2.5	3	1.7	0.2	0	0.2	0	0	0.6	0.2	0
AgE63	35007	35336	AgE63_g005_t01	+	330	1	homeobox-containing protein 1			0.4	0.9	0.3	0	0	0	0	0	0	0.3	0	0	0	0.1	0.2	0	0.3	0.1	0.3	1.1	0.8	0	0	1.2	0.3
AgE64	5073	6191	AgE64_g001_t01	+	282	2	von willebrand factor type egf and pentraxin domain-containing protein 1			1.2	1.3	0	0	0	1.5	0.9	1.1	0	1.1	4	0.9	1.7	0.8	22.7	37.5	30.2	3.1	0.5	1.4	0.8	0	0.1	0.1	0
AgE64	28089	29280	AgE64_g002_t01	.	1192	1	hypothetical protein			4.7	2.1	0.6	0	0.7	13.6	1.2	1.8	0	0.9	6.7	5.7	13.4	1.8	15	7.3	5.4	9.4	3.2	3.3	5.5	0	0.1	0	0
AgE64	33901	35079	AgE64_g003_t01	.	1179	1	hypothetical protein			2.1	2	0.6	0	0.3	12.2	0.6	1.5	0.1	1.6	6.4	5.2	11	1.7	12.4	8	4.5	10	3.2	3.8	7.4	0	0	0	0
AgE65	9470	12522	AgE65_g001_t01	-	808	3	hypothetical protein			28.2	97	8.2	0.2	3.7	23.4	21	22.8	7.2	1.6	2.7	4.1	6.7	4.1	25.6	22.4	44.4	9.8	3.2	2.1	5.1	0	0.1	0.2	0
AgE65	24138	32682	AgE65_g002_t03	-	1373	8	hypothetical protein	PgE091_g002_t04	MSTRG.22816.1	20.7	72.6	9.2	0.2	1.5	0.1	0.1	0.1	0	0.1	0.6	0.2	0.5	0.2	0.4	0.2	0	0.1	0	0	0.1	0	0.1	0	0
AgE66	1	3841	AgE66_g001_t04	-	906	5	MOG interacting and ectopic P-granules protein 1			2.7	0.1	1.6	2.2	1.5	8.9	3.3	4.4	2.2	3.4	16.7	18.2	24	28	31	24.3	14.5	16.6	16	16.5	10.7	3.8	3.4	3.6	3.8
AgE66	8420	20827	AgE66_g002_t01	-	3448	14	tudor domain containing protein	PgB28_g014_t01		3.6	0.2	0.1	0	1	11.7	5.1	4.8	1.2	0.5	4	2.9	2.8	3.7	20	18.3	12.3	2.6	0.7	0.5	0.7	0	0.2	0.2	0
AgE66	29635	33314	AgE66_g003_t01	-	1073	6	zinc c2h2 type family protein	PgB28_g015_t01,PgE157_g001_t01,PgE044_g003_t01		3	0.2	0.1	0.1	0.3	2.8	1.1	1	0	0	0	0	0	0	0.6	0.4	0.4	0.1	0.1	0	0	0	0	0	0
AgE67	8417	13244	AgE67_g001_t03	+	2061	3	hypothetical protein		MSTRG.21310.3	10.4	43	20.9	0.4	3.2	0.4	0.4	0.2	0.1	0	0.7	0.7	0.5	1	2.7	3.9	3.4	0.6	0.2	0.2	0.2	0	0.2	0.1	0
AgE67	8417	26447	AgE67_g002_t01	-	1899	8	60s ribosomal protein l4			141.7	64.5	9	0.5	15.1	84.5	78.2	70.5	4.1	2.9	10.7	8.8	10.8	8.6	21.6	42.6	51.1	13.5	2.8	1.5	1.7	0	2.5	2.4	0.1
AgE68	4673	16965	AgE68_g001_t03	-	3137	10	PDZ domain-containing protein GIPC3	PgE018_g002_t01	MSTRG.20906.1,MSTRG.20905.1,MSTRG.20905.1,MSTRG.13359.1	22.6	148.2	82.8	1.1	7.4	0.1	0.1	0.1	0.3	0.1	0.2	0.1	0.1	0.2	0.2	0.3	0.2	0	0	0	0.1	0	0.9	0	0.2
AgE69	1370	29716	AgE69_g001_t01	-	2925	14	hypothetical protein	PgE009_g004_t09	MSTRG.17382.1	8.7	23.2	2.2	0	1.1	3.4	3.4	2.8	1.3	1.2	4.7	6.2	5.7	7.2	8.1	7.7	5.2	1.3	0.3	0.6	0.6	0	0.3	0.1	0.1
AgE69	15911	25622	AgE69_g002_t01	+	7021	3	hypothetical protein	PgE009_g003_t01	MSTRG.21097.3	2.3	4.8	0.6	0	0.5	0.6	0.6	0.6	0.4	0.1	0.5	0.6	0.8	0.6	0.6	0.6	0.5	0.1	0	0.1	0.1	0	0.1	0	0
AgE70	831	2433	AgE70_g001_t01	-	329	3	Cleavage and polyadenylation specificity factor subunit 3			3.9	0.8	1.1	0.3	1.8	10.2	5	4.8	1.3	0.4	1.9	1.4	1	4	4.5	5	3.8	12.3	11.7	7.2	4.4	0	0.7	0	0.3
AgE70	3080	17517	AgE70_g002_t04	-	11689	5	hypothetical protein		MSTRG.23969.1,MSTRG.23969.1,MSTRG.23968.1,MSTRG.23968.1,MSTRG.23444.1	3.4	2.9	0.3	0.3	0.6	1.3	0.5	0.5	0.3	0.4	2.3	2.2	1.8	3	6.2	3.7	2.8	2.1	0.8	0.9	0.8	0.6	0.1	0.1	0.2
AgE70	22837	29282	AgE70_g003_t01	-	4624	3	abhydrolase domain-containing protein			2.8	1.9	0.3	0	0.2	3.1	2.1	2	0.3	1.1	6.3	4	2.6	6.1	8.7	7.5	3.2	1.9	0.6	0.6	0.8	0	0.3	0.1	0
AgE70	22837	29282	AgE70_g004_t02	+	5400	3	abhydrolase domain-containing protein			5.8	4.4	0.6	0	0.1	2.1	1	1.1	0.1	0.8	4.9	3.2	1.3	4.3	6.4	5.2	2.6	1.1	0.5	0.4	0.5	0	0.2	0	0
AgE71	1765	13065	AgE71_g001_t02	-	1916	11	hypothetical protein	PgE178_g001_t01	MSTRG.18621.7,MSTRG.19195.1	5.8	2.2	0.7	0	1.3	2.2	1.6	2	0.6	1.2	4.2	5.9	7	6.6	6.1	5.4	3.6	0.6	0.3	0.3	0.4	0	0.2	0.2	0.2
AgE71	17506	23221	AgE71_g002_t01	-	2624	4	ubiquitin-conjugating enzyme e2 1	PgE109_g003_t01,PgE109_g002_t01,PgE111_g001_t01,PgE030_g001_t02	MSTRG.17394.1,MSTRG.8297.2,MSTRG.1696.1,MSTRG.18751.1,MSTRG.13376.1,MSTRG.22259.5,MSTRG.21511.1,MSTRG.7436.1,MSTRG.18545.1,MSTRG.16583.3,MSTRG.21589.1,MSTRG.21512.1	3.2	0.3	0.2	0	1.5	2.9	0.9	0.5	0	0.4	1.2	1.1	0.7	1.4	1.3	0.7	0.2	0.2	0	0.1	0.2	0	0.1	0.1	0
AgE72	1222	1347	AgE72_g001_t01	-	126	1	hypothetical protein			1.2	19.8	0.7	0	0	0.8	1.4	0.7	0	0	0	0	0	2.1	0	0.6	0.9	0.6	0.3	0	0.7	0	0.2	0	0
AgE72	18367	18675	AgE72_g002_t07	+	309	1	hypothetical protein			11.7	6.4	0.3	0	0.7	11.7	8.4	9	1.8	0	1.4	1.4	5.1	10.4	24.5	25.1	21.7	10.2	1.5	0.6	1.5	0	0	0.1	0
AgE72	25903	26472	AgE72_g003_t01	+	570	1	hypothetical protein			2.1	1.4	0.4	0	1.2	1.5	1.3	1.9	0	0	0.2	1.1	0.6	0.5	5.6	5.5	2.6	0.6	0.3	0.1	0.3	3	0	0	0
AgE73	21944	22422	AgE73_g001_t01	.	479	1	hypothetical protein			1.9	0.1	0.1	0	0	0.9	0.7	0.2	0	0.1	0.8	0.9	1.3	1.2	0.5	0.4	0	0.1	0	0	0.3	0	0	0	0
AgE73	25766	27379	AgE73_g002_t01	-	396	2	gtpase-activating protein pac-1	PgE157_g001_t01,PgE044_g003_t01,PgB28_g015_t01		10.1	10.3	3.9	0.9	2.2	9.1	7.6	8.9	5	0.4	2.3	2	5.1	7	4.3	5	5.9	2.9	4.3	5.8	10.6	17.5	1.6	1.6	1.2
AgE74	2213	5044	AgE74_g001_t01	-	400	3	Nuclear cap-binding protein subunit 1-B		MSTRG.23230.11	23.1	15.7	1.2	0	3.2	15.9	18.5	17.3	3.3	1.1	3.9	3.3	5.8	7.6	6.9	7.1	4.4	0.5	0	0	0	0	0.1	0	0
AgE74	5746	21127	AgE74_g002_t02	-	4178	6	Nuclear cap-binding protein subunit 1-B		MSTRG.23230.11	9	8.5	1	0	0.3	0.1	0.1	0.1	0	0	0	0	0.1	0.2	0.3	0.2	0.1	0	0	0	0.1	0	0	0	0
AgE74	24222	25763	AgE74_g003_t01	-	1542	1	Putative proline-rich protein 21 (Fragment)			0	0.2	0	0	0	0	0	0	0	0	0.2	0.4	0.1	0	0.2	0	0.4	0.2	0.1	0	0.1	0	0	0	0
AgE74	25843	27207	AgE74_g004_t01	.	1365	1	hypothetical protein			1.8	3	0.9	0	0.4	0.1	0.1	0.1	0	0.1	0.4	1	0.5	0.2	0.4	0.3	0.5	0.2	0.5	0.6	0.3	0	0	0	0.1
AgE75	21243	23214	AgE75_g001_t01	-	918	3	zinc c2h2 type family protein	PgE272_g001_t01,PgE044_g003_t01,PgB28_g015_t01,PgE157_g001_t01		0.4	0.1	0.1	0.1	0	1.3	0.2	0.2	0	0	0.1	0.2	0	0	0.2	0	0	0.1	0	0	0	0	0	0	0
AgE75	24196	25729	AgE75_g002_t01	+	530	2	hypothetical protein			0.5	0.1	0	0	0	1.9	0.8	0.5	0	0	0	0	0	0	0.2	0	0.3	0	0	0	0	0	0	0	0
AgE76	11041	16497	AgE76_g001_t11	-	2374	5	MOG interacting and ectopic P-granules protein 1		MSTRG.18836.1	10	1.3	0.5	0.1	3.1	4	6.6	7.2	3.2	2.8	13.2	11.4	7	13.4	5.3	6.5	2.8	0.4	0.1	0.2	0.3	0	0.6	0.3	0
AgE76	6757	8017	AgE76_g002_t01	+	1261	1	mog interacting and ectopic p-granules protein 1			5.9	0.7	0.1	0	0.8	0.3	0.3	0.1	0.3	0	0.2	0.2	0.2	0.2	0.4	1.1	0.4	0.4	0	0.1	0	0	0	0	0
AgE77	1	5172	AgE77_g001_t01	+	1011	5	proteophosphoglycan ppg4			27.6	2.1	1.8	0.2	15.4	75.2	54.1	50.7	3.3	4	17.8	23.7	43.3	25.5	25	47.5	48.5	6.3	1.3	1.8	1.2	0	2.1	0.7	0
AgE77	5552	7132	AgE77_g002_t03	+	373	3	proteophosphoglycan ppg4			22.1	1.1	0.6	0.1	12.2	55.3	48.1	40.3	4.1	6.1	27.7	59	149.4	19.8	24.6	43.5	97.7	4.5	0.3	0.7	0.6	0	3.1	0.9	0
AgE77	9539	10696	AgE77_g003_t01	.	1158	1	hypothetical protein			5.3	0.1	0.1	0	2.2	6.2	8.6	7.5	0.7	1.4	5.4	9.6	25.8	4.2	4.4	9.5	21.2	1.2	0.3	0.4	0.4	0	0.8	0.2	0
AgE78	10021	10880	AgE78_g001_t01	.	860	1	hypothetical protein			1	0.7	0.1	0	0	0.3	0.9	1.3	0	0	0.4	0.1	0	0.4	0.5	0.1	0.1	0.1	0	0	0	0	0	0	0
AgE79	3728	4607	AgE79_g001_t01	-	330	2	hypothetical protein			24.4	3.7	2.5	3.1	9.2	26.7	23.3	24.5	0.7	5.9	11	13.8	15.4	15.9	24.5	17.6	15.4	19.5	22	18	7.2	0	2.1	0.4	0.8
AgE80	3408	4845	AgE80_g001_t01	.	1438	1	Transposon-derived protein, partial	PgE006_g009_t01		4.3	4.6	1.1	0.2	0.3	0.3	0.2	0.1	0.3	0.2	0.3	0.5	0.4	0.4	0.6	0.4	0.6	0.6	0.7	1.3	1.8	0	0.2	0.1	0.2
AgE81	1	6044	AgE81_g001_t07	-	5559	2	hypothetical protein			5	7.1	0.6	0	0.5	0.4	0.2	0.1	0	0	0.9	1.4	1.1	1.2	2.2	1.2	0.8	0.4	0.1	0.2	0.3	0	0	0	0
AgE82	2515	5097	AgE82_g001_t01	-	2451	2	ATP synthase subunit a protein, partial (mitochondrion)			0.6	0.1	0.1	0	0	1	0.5	0.3	0.1	0.1	0.2	0.2	0.5	0.2	3.9	2.8	1.6	0.4	0.1	0.1	0	0.7	0	0	0
AgE85	557	1156	AgE85_g001_t01	-	186	2	hypothetical protein	PgE058_g003_t04	MSTRG.16873.1	47.7	106.9	27.2	0.2	3.5	0.7	0.2	0	0	0.2	0	3.1	0.6	0	6.5	4.8	7.9	0.4	0	0.2	0	0	0.6	0	0.5

## Sheet: Parascaris
Chromosome	Start	End	Transcript_name	Strand	Tx_length	# of Exons	Annotation	Conserved in Ascaris eliminated genes	Conserved in Toxocara eliminated genes	Testis	Ovary	Embryo	Intestine	Carcass
PgB01	4162243	4162642	PgB01_g251_t01	-	216	2	hypothetical protein			0	0	0	0	0
PgB02X	3505186	3510257	PgB02X_g220_t02	-	3931	4	Glycogen synthase kinase-3	AgE17_g009_t02,AgE47_g003_t06,AgE04_g034_t02,AgE16_g006_t02,AgE23_g001_t01,AgE06_g013_t01,AgB26_g001_t02	MSTRG.21423.2,MSTRG.16870.5,MSTRG.21893.3,MSTRG.23672.1,MSTRG.20803.1,MSTRG.16581.1,MSTRG.20937.1,MSTRG.20625.12,MSTRG.20409.5,MSTRG.21941.1,MSTRG.22069.3,MSTRG.23332.3,MSTRG.23443.1,MSTRG.12983.2	19	1.6	8.2	0.5	0.2
PgB02X	3508464	3510259	PgB02X_g221_t01	+	1701	2	Glycogen synthase kinase-3	AgE17_g009_t02,AgE47_g003_t06,AgE04_g034_t02,AgE16_g006_t02,AgB26_g001_t02	MSTRG.21423.2,MSTRG.16870.5,MSTRG.20937.1,MSTRG.21893.3,MSTRG.20803.1,MSTRG.23672.1,MSTRG.16581.1,MSTRG.20625.12	11.9	0.3	1.2	0.2	0
PgB03	3285165	3291426	PgB03_g166_t01	+	2014	6	LINE-1 reverse transcriptase	AgB06_g004_t01	MSTRG.22171.2,MSTRG.20933.2	28.3	0.2	1	0.1	0.2
PgB03	3295726	3296162	PgB03_g167_t01	.	437	1	hypothetical protein			2.7	0	0	0	0
PgB03	3296392	3304783	PgB03_g168_t03	-	2280	5	LINE-1 reverse transcriptase	AgB06_g004_t01	MSTRG.20933.2,MSTRG.22171.2,MSTRG.20932.1	32	0.2	2.2	0.3	0.9
PgB03	3311485	3313974	PgB03_g169_t03	-	889	2	hypothetical protein			4.8	17.6	6.1	1	0
PgB03	3308338	3308901	PgB03_g170_t01	.	564	1	hypothetical protein			7.7	4	7.3	0	0.3
PgB03	3314582	3324613	PgB03_g171_t01	+	3046	6	protein-like protein 4	AgE07_g016_t02	MSTRG.22964.4	2.2	0.5	2.4	0	0
PgB03	3326691	3338450	PgB03_g172_t06	-	1236	7	hypothetical protein	AgE07_g009_t01,AgB01_g831_t04	MSTRG.13371.1,MSTRG.13371.1	72.7	0.1	0.4	1	0.7
PgB03	3343467	3344046	PgB03_g173_t01	.	580	1	hypothetical protein			6.2	0	0	2.2	0
PgB03	3344914	3349404	PgB03_g174_t01	+	657	5	hypothetical protein		MSTRG.17764.1	1.2	0.1	0	0	0
PgB04	2915944	2919708	PgB04_g195_t01	+	1548	3	Poly(A) RNA polymerase gld-2	AgB30_g001_t04,AgE14_g014_t06		28.5	14.3	10	1.4	0.3
PgB04	2931370	2945978	PgB04_g196_t01	+	1941	14	Poly(A) RNA polymerase gld-2	AgE36_g004_t05,AgE36_g004_t05,AgE61_g003_t01	MSTRG.18398.1,MSTRG.22503.1,MSTRG.23204.6	25.5	12.9	11.7	1.1	0.1
PgB04	2946442	2947051	PgB04_g197_t01	-	267	2	hypothetical protein			3	0.5	0	0	0
PgB07	1877638	1895903	PgB07_g103_t01	-	2754	18	chitin synthase 8	AgB07_g007_t05	MSTRG.23261.1	5.1	157.6	94	0.9	0.4
PgB08	1710372	1714136	PgB08_g097_t01	+	1548	3	Poly(A) RNA polymerase gld-2	AgB30_g001_t04,AgE14_g014_t06		28.7	15.5	8.4	1.4	0.4
PgB08	1725798	1740406	PgB08_g098_t01	+	1941	14	Poly(A) RNA polymerase gld-2	AgE36_g004_t05,AgE36_g004_t05,AgE61_g003_t01	MSTRG.18398.1,MSTRG.22503.1,MSTRG.23204.6	25.8	14.1	12.8	1.1	0.1
PgB08	1740870	1741479	PgB08_g099_t01	-	267	2	hypothetical protein			2.7	0.2	0	0	0
PgB09	1675851	1676678	PgB09_g098_t01	-	309	3	zinc c2h2 type family protein			0.5	0	0	0	0
PgB09	1679633	1680882	PgB09_g099_t04	+	211	2	hypothetical protein			0.9	7.8	14.7	0	0
PgB09	1687258	1696855	PgB09_g100_t03	+	2571	9	ATP-dependent RNA helicase cgh-1	AgB31X_g005_t01,AgB29_g002_t01	MSTRG.19776.5,MSTRG.19777.1,MSTRG.19777.1	13.2	15	11.4	0.5	0.1
PgB10	1563663	1570942	PgB10_g103_t01	+	1548	11	Tau-tubulin kinase 1	AgB21_g003_t02,AgE26_g003_t02,AgE06_g006_t01,AgE05_g002_t01,AgB26_g001_t02,AgE57_g001_t04,AgB33_g007_t02,AgE01_g016_t01,AgE22_g012_t05,AgE06_g013_t01,AgB14_g003_t05,AgE47_g003_t06,AgE16_g006_t02	MSTRG.21667.1,MSTRG.22718.1,MSTRG.23846.1,MSTRG.20782.13,MSTRG.20782.13,MSTRG.13368.2,MSTRG.20353.1,MSTRG.13365.1,MSTRG.23052.1,MSTRG.22673.1,MSTRG.22167.7,MSTRG.18753.1,MSTRG.17769.3,MSTRG.18388.5,MSTRG.16874.1,MSTRG.21745.1,MSTRG.19589.1,MSTRG.22376.1,MSTRG.22376.1,MSTRG.21747.2,MSTRG.20059.1,MSTRG.23426.4,MSTRG.22403.2,MSTRG.21655.5,MSTRG.21655.5,MSTRG.21615.1,MSTRG.13370.1,MSTRG.16581.1,MSTRG…	145.9	68.8	18.6	3.4	2.5
PgB10	1575073	1608493	PgB10_g104_t01	-	3680	20	Serine/threonine-protein phosphatase PP1		MSTRG.22528.1,MSTRG.24366.2,MSTRG.22833.10,MSTRG.23241.1,MSTRG.22693.5,MSTRG.24135.1	133.2	0.3	3.3	2.1	2.3
PgB10	1588857	1590024	PgB10_g105_t01	.	1168	1	serine threonine-protein kinase pelle			22.1	0.6	4.2	0.8	0.2
PgB11	1371286	1371916	PgB11_g083_t01	-	408	2	hypothetical protein			0	0	0	0	0
PgB11	1373219	1374758	PgB11_g084_t01	+	411	2	hypothetical protein		MSTRG.17764.1,MSTRG.22206.1	4.7	0	0	0	0
PgB12X	1368743	1372164	PgB12X_g070_t01	-	543	5	hypothetical protein			3.3	5.6	1.2	0	0
PgB13	1341278	1342146	PgB13_g069_t01	.	869	1	hypothetical protein			0.9	1.1	0.2	0	0
PgB13	1343670	1347820	PgB13_g070_t01	-	614	3	m-phase inducer phosphatase			4.1	6.3	9	0	0
PgB15	1052909	1056330	PgB15_g057_t01	-	543	5	hypothetical protein			3.5	7	1.1	0	0
PgB16	1025992	1026964	PgB16_g060_t01	-	480	3	hypothetical protein			0	0	0	0	0
PgB17	982720	983102	PgB17_g066_t01	.	383	1	Eukaryotic translation initiation factor 2 subunit 3			0	0	0	0	0
PgB17	988400	998861	PgB17_g067_t01	+	793	7	26s proteasome non-atpase regulatory subunit 12	AgB06_g004_t01	MSTRG.20901.3,MSTRG.23768.1,MSTRG.23768.1,MSTRG.22171.2,MSTRG.20933.2	133.2	0	0	0.4	1.6
PgB17	1000159	1011085	PgB17_g068_t01	+	764	6	26s proteasome non-atpase regulatory subunit 12	AgB04_g460_t04	MSTRG.17731.33,MSTRG.17758.1	56.3	0	0	4	0.1
PgB17	1016372	1024122	PgB17_g069_t01	-	1651	4	excitatory amino acid transporter	AgB04_g462_t03,AgE04_g019_t01	MSTRG.17757.1,MSTRG.21657.6,MSTRG.19190.1,MSTRG.23780.3,MSTRG.23780.3	44.2	0	1.5	0.7	0.7
PgB17	1024934	1025533	PgB17_g070_t01	.	600	1	hypothetical protein			2	0	0	0	0
PgB18	890579	900818	PgB18_g049_t02	-	1439	8	megakaryocyte-associated tyrosine-protein kinase	AgB12_g002_t10,AgE09_g017_t01	MSTRG.18387.3,MSTRG.18387.3	236.1	4.8	2.4	4.5	2.3
PgB19	778740	783097	PgB19_g040_t01	-	690	5	hypothetical protein	AgE52_g004_t02,AgE52_g004_t02,AgE41_g004_t01	MSTRG.21614.1,MSTRG.21614.1	13	0	4.5	0	0.1
PgB20	778103	785241	PgB20_g058_t01	+	1107	7	hypothetical protein	AgE04_g017_t01,AgB20_g012_t05	MSTRG.22259.5,MSTRG.17390.5,MSTRG.17223.2,MSTRG.21582.1	12.4	139.9	119.3	4.2	0.4
PgB21	652321	656306	PgB21_g044_t06	+	2292	3	Tyrosine-protein kinase Fps85D			535.4	14.1	13	15.5	5.8
PgB21	652940	656306	PgB21_g045_t02	-	2573	3	Tyrosine-protein kinase Fps85D			636	9.1	12.8	17.7	6.7
PgB22	552900	563379	PgB22_g038_t01	+	4538	7	Phosphate carrier protein	AgE26_g005_t01,AgE01_g019_t01,AgE03_g027_t02	MSTRG.22506.1,MSTRG.21518.1,MSTRG.21518.1,MSTRG.22206.1	14.7	0.3	1.7	0	0.1
PgB22	560521	564875	PgB22_g039_t01	-	3430	2	hypothetical protein		MSTRG.23649.1,MSTRG.23650.1	8.2	0.1	1	0.3	0.1
PgB22	564921	592324	PgB22_g040_t02	-	3318	16	hypothetical protein	AgE26_g004_t04,AgE27_g001_t07,AgE27_g001_t07,AgE27_g001_t07	MSTRG.10847.9,MSTRG.10847.9,MSTRG.13359.1	96.6	1	0.9	1.6	0.7
PgB22	593095	603347	PgB22_g041_t04	-	3851	9	Tau-tubulin kinase 2	AgE26_g003_t02,AgB26_g001_t02,AgE01_g016_t01,AgE06_g006_t01,AgB33_g007_t02,AgB21_g003_t02,AgE05_g002_t01,AgE57_g001_t04,AgE03_g039_t02,AgE22_g012_t05	MSTRG.22376.1,MSTRG.22376.1,MSTRG.16874.1,MSTRG.23426.4,MSTRG.17769.3,MSTRG.20059.1,MSTRG.22673.1,MSTRG.22167.7,MSTRG.20782.13,MSTRG.23846.1,MSTRG.23052.1,MSTRG.21667.1,MSTRG.22718.1,MSTRG.13368.2,MSTRG.19589.1,MSTRG.13365.1,MSTRG.20353.1,MSTRG.21745.1,MSTRG.21747.2,MSTRG.18753.1,MSTRG.18388.5,MSTRG.22403.2,MSTRG.17766.1,MSTRG.21615.1,MSTRG.17765.1,MSTRG.20409.5	74.7	3.2	5.7	1.4	0.7
PgB22	608171	631669	PgB22_g042_t04	+	3064	21	ubiquitin carboxyl-terminal hydrolase 7	AgB16X_g001_t03,AgE26_g002_t01,AgB27X_g021_t05,AgE06_g020_t05,AgB01_g832_t01,AgB02_g278_t01	MSTRG.20880.1,MSTRG.21577.15,MSTRG.21577.15,MSTRG.20929.1,MSTRG.20522.1	13.3	24	9.1	0.5	0
PgB22	636921	640841	PgB22_g043_t01	+	732	5	hypothetical protein			167.3	0	1.1	2.6	4.4
PgB22	641689	654055	PgB22_g044_t02	-	3644	11	4-hydroxybutyrate coenzyme A transferase	AgE26_g001_t02	MSTRG.22652.1,MSTRG.23321.6,MSTRG.23321.6,MSTRG.22627.1,MSTRG.22543.7,MSTRG.22782.1	139.2	4.1	4.3	5.8	1.2
PgB25	339024	348295	PgB25_g018_t01	-	1666	8	Serine/threonine-protein kinase	AgB33_g007_t02,AgE06_g006_t01,AgE26_g003_t02,AgB26_g001_t02,AgE01_g016_t01,AgB21_g003_t02,AgE57_g001_t04,AgE05_g002_t01,AgE03_g039_t02,AgB14_g003_t05,AgE22_g012_t05,AgE23_g001_t01	MSTRG.22167.7,MSTRG.23846.1,MSTRG.16874.1,MSTRG.17769.3,MSTRG.22673.1,MSTRG.20782.13,MSTRG.20782.13,MSTRG.13368.2,MSTRG.22376.1,MSTRG.20059.1,MSTRG.22718.1,MSTRG.20353.1,MSTRG.21667.1,MSTRG.23426.4,MSTRG.13365.1,MSTRG.21745.1,MSTRG.21747.2,MSTRG.23052.1,MSTRG.19589.1,MSTRG.18753.1,MSTRG.18388.5,MSTRG.21615.1,MSTRG.17766.1,MSTRG.22403.2,MSTRG.22069.3,MSTRG.20409.5,MSTRG.21655.5,MSTRG.17765.1	76.7	0.1	0	1	0.1
PgB25	349826	359039	PgB25_g019_t01	+	1547	7	tyrosine-protein kinase fps85d	AgB33_g008_t01,AgE02_g027_t05,AgB34_g005_t05,AgE03_g026_t04,AgE03_g022_t01,AgE04_g018_t07,AgB29_g016_t02,AgE12_g003_t14,AgE04_g029_t08,AgE47_g003_t06,AgE63_g004_t06,AgE29_g002_t02,AgE17_g009_t02,AgE06_g006_t01,AgE23_g001_t01,AgB33_g007_t02,AgE04_g034_t02	MSTRG.17933.1,MSTRG.23481.2,MSTRG.21090.8,MSTRG.21090.8,MSTRG.21090.8,MSTRG.23443.1,MSTRG.23400.4,MSTRG.11670.1,MSTRG.11670.1,MSTRG.11670.1,MSTRG.11670.1,MSTRG.7427.1,MSTRG.23125.4,MSTRG.19994.2,MSTRG.19994.2,MSTRG.23796.1,MSTRG.18317.15,MSTRG.21580.2,MSTRG.19573.8,MSTRG.16581.1,MSTRG.22069.3,MSTRG.21941.1,MSTRG.22241.1,MSTRG.20409.5,MSTRG.16870.5,MSTRG.8296.2,MSTRG.20187.3,MSTRG.23332.3	138.6	0	2.1	1	1.4
PgB25	360748	391103	PgB25_g020_t03	-	11924	13	Tyrosine-protein kinase Fes/Fps	AgE11_g002_t03,AgE07_g004_t04	MSTRG.21252.1,MSTRG.17934.6,MSTRG.17934.6,MSTRG.22383.1,MSTRG.21255.8,MSTRG.21255.8,MSTRG.21255.8,MSTRG.22868.1,MSTRG.4189.1,MSTRG.23883.1	14.6	0	0.4	0.3	0.1
PgB25	394229	406153	PgB25_g021_t02	+	1594	8	hypothetical protein	AgE11_g003_t08		79.9	0	0	0.6	0.5
PgB26	362511	362944	PgB26_g024_t01	-	234	2	Neuroglian			0	0	0	0	0
PgB27X	307349	312803	PgB27X_g010_t06	-	1016	5	fizzy-related protein-like protein	AgB28X_g008_t02,AgB28X_g008_t02		19.9	8.5	8.3	0	0
PgB28	238501	249945	PgB28_g014_t01	+	2268	15	tudor domain containing protein	AgE66_g002_t01		3.7	13.5	4.8	0	0
PgB28	267123	273252	PgB28_g015_t01	-	1694	9	zinc c2h2 type family protein	AgE35_g005_t01,AgB21_g002_t01,AgE05_g022_t01,AgB28X_g019_t01,AgE14_g005_t01,AgB08X_g003_t01,AgE22_g003_t01,AgE22_g003_t01,AgB28X_g016_t01,AgB32_g001_t01,AgE03_g007_t01,AgE66_g003_t01,AgE32_g001_t01,AgB32_g002_t01,AgE03_g006_t01,AgB09X_g154_t02,AgB16X_g004_t01,AgB16X_g003_t01,AgB08X_g002_t01,AgE75_g001_t01,AgE47_g001_t02		0.6	10.4	6.6	0	0
PgB29	273709	276828	PgB29_g011_t01	+	769	4	Protein EFR3			5.2	1.6	2.8	0	0
PgB30	207033	212147	PgB30_g011_t02	-	2897	4	hypothetical protein			13.3	0.3	5.3	0.3	0.1
PgB30	209311	214124	PgB30_g012_t05	+	3411	5	putative trna threonylcarbamoyladenosine biosynthesis protein osgep		MSTRG.22560.1,MSTRG.23889.1,MSTRG.22105.1	10.8	0.6	5.6	0.2	0
PgB31	202155	202553	PgB31_g016_t01	+	399	1	hypothetical protein			1.1	0	0	0	0.4
PgB32	109124	123212	PgB32_g009_t05	-	2552	13	Eukaryotic translation initiation factor 3 subunit B	AgB02_g286_t03,AgB02_g285_t01		79.9	0.2	1.3	3	0.6
PgB32	123706	129015	PgB32_g010_t01	-	1136	4	hypothetical protein			5.4	16.9	19.4	0	0
PgB32	130012	142758	PgB32_g011_t03	-	1886	12	hypothetical protein	AgE01_g028_t01,AgB02_g284_t01	MSTRG.22955.3,MSTRG.24227.1,MSTRG.22956.1,MSTRG.21056.1,MSTRG.21056.1	170.7	0	1.2	5.4	2.3
PgB32	144526	166266	PgB32_g012_t07	-	4454	16	hypothetical protein	AgE01_g027_t07		16.3	26.6	11.3	0.5	0.2
PgB32	166839	170106	PgB32_g013_t01	-	1060	4	FACT complex subunit SSRP1		MSTRG.23131.2,MSTRG.20615.4	31.4	120.1	96.1	0.6	0.5
PgB32	173583	184846	PgB32_g014_t01	+	2687	10	ankyrin repeat domain-containing protein 12	AgE01_g024_t03	MSTRG.23905.4,MSTRG.23905.4,MSTRG.17406.1,MSTRG.22700.1	9.1	339.2	155.3	3.3	0.9
PgB32	186554	194054	PgB32_g015_t04	+	1533	6	hypothetical protein	AgE01_g023_t07	MSTRG.22477.1	11	0.3	1.1	0.7	0
PgB33	73445	86303	PgB33_g004_t03	+	3119	14	Condensin-2 complex subunit H2			13.3	5	4.9	0.2	0.1
PgB33	91149	91523	PgB33_g005_t01	-	375	1	Histone H2B.1/H2B.2		MSTRG.16584.1	0	0	0	0	0
PgB33	91715	92279	PgB33_g006_t01	.	565	1	Histone H2B 2			1.5	0.8	1.5	0	0
PgB33	94006	99102	PgB33_g007_t02	-	1947	8	N-glycosidase R617	AgB24_g003_t06	MSTRG.2303.3,MSTRG.22763.14,MSTRG.21627.1,MSTRG.22068.3,MSTRG.17952.4	53.7	118.5	57.4	5.2	2.5
PgB33	105465	116821	PgB33_g008_t02	+	1728	9	hypothetical protein	AgE52_g002_t02,AgE41_g003_t06	MSTRG.18742.2,MSTRG.20447.1,MSTRG.20447.1	164.4	0	0.4	4.6	1.7
PgB33	118955	124404	PgB33_g009_t07	+	4193	3	hypothetical protein	AgE52_g001_t02	MSTRG.21336.1	17.7	0	0.4	0.6	0.1
PgB34	34464	34845	PgB34_g003_t01	.	382	1	hypothetical protein			2.8	1.5	0	0	0
PgB34	64645	68232	PgB34_g004_t04	-	318	3	bromodomain-containing protein 3	AgE03_g038_t01	MSTRG.22101.15	5.9	6.4	6.1	0	0
PgB34	86766	104786	PgB34_g005_t01	+	2598	18	Lamin-1	AgE06_g024_t02,AgE10_g010_t02,AgE10_g010_t02,AgE06_g002_t01,AgE06_g002_t01	MSTRG.21940.4,MSTRG.22743.10,MSTRG.22743.10,MSTRG.22744.1,MSTRG.21942.1,MSTRG.22470.1	0.8	0.5	1.6	0.1	0
PgB34	96330	98174	PgB34_g006_t01	+	962	3	Lamin-1	AgE06_g024_t02,AgE10_g010_t02	MSTRG.22743.10,MSTRG.21940.4,MSTRG.22744.1,MSTRG.21942.1	1.1	0	1.9	0	0
PgB34	98596	101681	PgB34_g007_t01	+	637	3	hypothetical protein			1.6	0	0	0	0
PgB35	101290	103857	PgB35_g008_t03	-	1276	4	Tubulin alpha chain	AgE01_g014_t01,AgE31_g003_t01	MSTRG.21951.9,MSTRG.22771.4,MSTRG.21949.2,MSTRG.21949.2,MSTRG.22951.3,MSTRG.19994.2,MSTRG.22953.1,MSTRG.22953.1	8	9.2	12	0	0
PgB36X	54430	64337	PgB36X_g003_t01	+	2183	9	regulator of microtubule dynamics protein 1	AgE25_g002_t05,AgE01_g017_t03	MSTRG.18616.4,MSTRG.23278.1,MSTRG.21516.2,MSTRG.23194.1	117.2	0	0.2	3.2	1.8
PgB36X	54474	74512	PgB36X_g004_t03	-	11088	11	Branched-chain-amino-acid aminotransferase	AgE25_g003_t04	MSTRG.20165.1,MSTRG.21692.1,MSTRG.21692.1	487.3	0.1	1.3	10.8	4.9
PgB36X	76450	83314	PgB36X_g005_t03	-	1184	8	hypothetical protein	AgE25_g005_t02	MSTRG.20535.2,MSTRG.22400.1,MSTRG.20529.2	106.5	0	0	1.2	1.8
PgB36X	87098	89732	PgB36X_g006_t01	+	869	3	Fem-3 mRNA-binding factor 2			0.8	0.9	2	1.2	0
PgB36X	97508	102493	PgB36X_g007_t02	+	567	5	homeobox protein ceh-18	AgE25_g006_t04		18.2	11.8	8.7	3.1	0
PgB37	55520	77593	PgB37_g005_t03	+	1997	14	tyrosine-protein kinase fer	AgE63_g004_t06,AgE12_g003_t14,AgE03_g026_t04,AgE04_g018_t07,AgB34_g005_t05,AgE03_g022_t01,AgB29_g016_t02,AgE02_g027_t05,AgE04_g029_t08,AgE23_g001_t01,AgE07_g012_t01,AgB33_g008_t01,AgE47_g003_t06	MSTRG.21580.2,MSTRG.7427.1,MSTRG.23400.4,MSTRG.23443.1,MSTRG.19994.2,MSTRG.19994.2,MSTRG.17933.1,MSTRG.23125.4,MSTRG.23796.1,MSTRG.18317.15,MSTRG.19573.8,MSTRG.21090.8,MSTRG.22069.3,MSTRG.23481.2,MSTRG.21941.1,MSTRG.20409.5,MSTRG.22241.1,MSTRG.20759.5,MSTRG.16581.1,MSTRG.16870.5,MSTRG.8296.2,MSTRG.11670.1,MSTRG.23332.3	106.9	25.2	8.8	2.4	0.7
PgB37	81621	83411	PgB37_g006_t01	-	789	3	Dipeptidyl peptidase 3			0.2	0.6	0	0.5	0
PgB37	85517	89112	PgB37_g007_t01	-	1139	4	FACT complex subunit SSRP1		MSTRG.23131.2,MSTRG.20615.4	23.8	53.5	43.8	1.9	0.3
PgB38	64945	77070	PgB38_g006_t02	-	4217	10	hypothetical protein	AgB24_g007_t01		10.7	1.7	4.3	0	0.2
PgB39	58845	69952	PgB39_g003_t18	-	5479	6	Eukaryotic translation initiation factor 4E-3	AgE49_g003_t01	MSTRG.22781.1,MSTRG.24100.1,MSTRG.24100.1	45.5	0	0	0.6	0.3
PgB39	55570	69984	PgB39_g004_t03	+	14123	2	Eukaryotic translation initiation factor 4E-3	AgE49_g003_t01	MSTRG.22781.1,MSTRG.24100.1	46.5	0.6	0.4	0.4	0.3
PgB39	70231	82325	PgB39_g005_t05	+	5644	10	Eukaryotic translation initiation factor 4E-3	AgE49_g004_t03	MSTRG.22357.1,MSTRG.21612.1,MSTRG.23291.1,MSTRG.20896.2,MSTRG.22072.2,MSTRG.23015.1	29.6	0.2	0.8	0.2	0.2
PgB39	73884	82244	PgB39_g006_t01	-	8270	2	Eukaryotic translation initiation factor 4E-3			9.9	0	0.6	0.1	0.1
PgB40X	64726	79636	PgB40X_g003_t02	-	2752	9	Transmembrane protein 186			15	1.3	0.5	0.9	0.7
PgB40X	65174	68134	PgB40X_g004_t05	+	2961	1	hypothetical protein			8.5	0.3	0.9	0.3	0.1
PgB41X	49731	59161	PgB41X_g003_t01	+	885	8	Serine/threonine-protein kinase	AgB14_g003_t05	MSTRG.21615.1,MSTRG.21615.1	0.9	1	2.3	1	0
PgB41X	62644	76232	PgB41X_g004_t04	+	2294	15	putative rna-binding protein orb2	AgB14_g002_t10,AgE14_g010_t04,AgB28X_g021_t03,AgE11_g010_t05	MSTRG.23108.1,MSTRG.23046.2,MSTRG.18758.3,MSTRG.18758.3,MSTRG.23435.4	79.9	4.1	4	1.9	1.1
PgB43	42628	56331	PgB43_g003_t03	+	1299	8	hypothetical protein	AgB10_g003_t01		28.1	0.1	1.7	0	0.1
PgB44	27895	49420	PgB44_g001_t11	-	11045	9	hypothetical protein	AgE59_g001_t09,AgE12_g001_t02,AgB36X_g004_t05	MSTRG.21073.4	26.2	0.4	0.5	0.8	0.1
PgB45	9909	26613	PgB45_g001_t01	-	3274	17	Solute carrier family 2	AgB32_g006_t01,AgB02_g473_t01,AgB01_g834_t04,AgB02_g472_t03	MSTRG.16871.4,MSTRG.23266.3,MSTRG.21333.2,MSTRG.21333.2,MSTRG.21333.2	104.7	22.6	8.9	3	1.7
PgB46	12307	16664	PgB46_g002_t01	-	690	5	hypothetical protein	AgE52_g004_t02,AgE52_g004_t02,AgE41_g004_t01	MSTRG.21614.1,MSTRG.21614.1	12	0	2.9	0	0.1
PgE001	8	27888	PgE001_g001_t03	+	5565	19	2-oxoglutarate dehydrogenase	AgE04_g033_t01	MSTRG.20802.2	31.7	2.6	3.1	0.8	0.3
PgE001	41997	52135	PgE001_g002_t01	-	1383	9	Tyrosine-protein kinase kin-31	AgE04_g029_t08,AgE03_g022_t01,AgE02_g027_t05,AgE04_g018_t07,AgE03_g026_t04,AgB29_g016_t02,AgB34_g005_t05,AgE12_g003_t14,AgE07_g012_t01	MSTRG.19573.8,MSTRG.23443.1,MSTRG.23400.4,MSTRG.23125.4,MSTRG.19994.2,MSTRG.19994.2,MSTRG.17933.1,MSTRG.23796.1,MSTRG.7427.1,MSTRG.21090.8,MSTRG.21580.2,MSTRG.18317.15,MSTRG.16581.1,MSTRG.20759.5	3.7	0	0	0	0.1
PgE001	69307	71362	PgE001_g003_t01	-	860	2	Acyl-protein thioesterase 1			29.7	0.9	3.2	0.8	0.2
PgE001	75495	75797	PgE001_g004_t01	+	303	1	hypothetical protein			0.2	0	0.6	0	0
PgE001	83864	85779	PgE001_g005_t01	+	714	2	hypothetical protein		MSTRG.23192.2	8.2	0.2	0.1	1.2	0.1
PgE001	95079	97217	PgE001_g006_t01	+	324	4	hypothetical protein	AgE01_g030_t03	MSTRG.23357.1	5.7	11.8	3.4	0	0
PgE001	105401	127734	PgE001_g007_t01	+	2874	19	tudor domain containing protein	AgE01_g033_t01,AgE01_g033_t01,AgE01_g033_t01,AgE01_g033_t01,AgB22X_g003_t04,AgB22X_g003_t04,AgB22X_g003_t04	MSTRG.7997.22,MSTRG.7997.22,MSTRG.19347.2,MSTRG.7998.1,MSTRG.21309.12	13.5	6.2	2.5	0.4	0.1
PgE002	4870	28363	PgE002_g001_t01	-	3024	20	tudor domain containing protein	AgE01_g033_t01,AgE01_g033_t01,AgE01_g033_t01,AgB22X_g003_t04,AgB22X_g003_t04	MSTRG.7997.22,MSTRG.7997.22,MSTRG.19347.2,MSTRG.7998.1,MSTRG.21309.12	16.4	7.6	3.1	0.6	0.1
PgE002	35386	37524	PgE002_g002_t01	-	324	4	hypothetical protein	AgE01_g030_t03	MSTRG.23357.1	5.1	12.6	2.8	0	0
PgE002	43938	48736	PgE002_g003_t01	-	753	3	hypothetical protein		MSTRG.23192.2	7.9	0.2	0	1.1	0
PgE002	56801	57103	PgE002_g004_t01	-	303	1	hypothetical protein			0.4	0	0.8	0	0.5
PgE002	59903	62605	PgE002_g005_t01	+	315	3	Acyl-protein thioesterase 1	AgE04_g026_t02	MSTRG.11413.2,MSTRG.23056.2,MSTRG.23055.2	21.7	0	0	0	3
PgE002	80456	90594	PgE002_g006_t01	+	1383	9	Tyrosine-protein kinase kin-31	AgE04_g029_t08,AgE03_g022_t01,AgE02_g027_t05,AgE04_g018_t07,AgE03_g026_t04,AgB29_g016_t02,AgB34_g005_t05,AgE12_g003_t14,AgE07_g012_t01	MSTRG.19573.8,MSTRG.23443.1,MSTRG.23400.4,MSTRG.23125.4,MSTRG.19994.2,MSTRG.19994.2,MSTRG.17933.1,MSTRG.23796.1,MSTRG.7427.1,MSTRG.21090.8,MSTRG.21580.2,MSTRG.18317.15,MSTRG.16581.1,MSTRG.20759.5	3.2	0	0	0	0.1
PgE002	106100	111283	PgE002_g007_t01	-	864	6	2-oxoglutarate		MSTRG.20802.2	21.5	2.6	8	0.1	0.1
PgE002	118021	129302	PgE002_g008_t01	-	1617	10	2-oxoglutarate dehydrogenase	AgE04_g033_t01	MSTRG.20802.2	36.3	3.3	1.3	0.9	0.4
PgE003	865	61746	PgE003_g001_t05	+	5901	40	Proteasome activator complex subunit 4	AgB23_g072_t01,AgE01_g009_t13,AgE12_g006_t04	MSTRG.21057.1,MSTRG.524.3,MSTRG.524.3,MSTRG.524.3,MSTRG.21621.1,MSTRG.23353.5,MSTRG.21623.1,MSTRG.21623.1	71.2	3.4	1.9	1.1	0.7
PgE003	62629	64833	PgE003_g002_t01	+	138	3	ccr4-not transcription complex subunit 4			3.2	12.5	1.2	4.3	5.3
PgE003	67948	70653	PgE003_g003_t01	+	1468	3	CCR4-NOT transcription complex subunit 4			1.4	4.6	1.8	2.4	0.8
PgE003	82143	87695	PgE003_g004_t02	-	3051	7	par-1 -like family member	AgE07_g015_t01,AgB29_g016_t02	MSTRG.22172.1,MSTRG.23347.1,MSTRG.23347.1,MSTRG.23061.1,MSTRG.23062.1,MSTRG.21887.1,MSTRG.21887.1	24.1	2	3.4	0.2	0.3
PgE003	92236	95152	PgE003_g005_t01	.	2917	1	protein-like protein 4			2.4	0.4	0.3	0	0
PgE003	104816	106670	PgE003_g006_t01	-	699	3	hypothetical protein		MSTRG.23278.1,MSTRG.23278.1,MSTRG.17764.1,MSTRG.17764.1,MSTRG.22206.1,MSTRG.16716.1,MSTRG.17937.1,MSTRG.17936.1	1.8	0	1.6	0.1	0.1
PgE004	3249	21419	PgE004_g001_t02	+	3591	13	Solute carrier family 2, facilitated glucose transporter member 5	AgB01_g834_t04,AgB32_g006_t01,AgB02_g473_t01	MSTRG.23266.3,MSTRG.23266.3,MSTRG.21333.2,MSTRG.21333.2,MSTRG.21333.2,MSTRG.16871.4	35.9	0.6	0.4	0.9	0.1
PgE004	21674	34125	PgE004_g002_t03	-	8300	6	hypothetical protein	AgE40_g004_t03	MSTRG.22256.2	15.4	0.1	0.7	0.3	0.2
PgE004	37307	44627	PgE004_g003_t01	+	580	4	hypothetical protein		MSTRG.20524.2,MSTRG.23276.1	45.5	0	0	2.3	0.4
PgE004	47838	64135	PgE004_g004_t02	+	3100	13	Eukaryotic translation initiation factor 3 subunit D	AgE01_g002_t01	MSTRG.20605.9,MSTRG.24158.2,MSTRG.24158.2,MSTRG.20606.1	68.3	0.1	0.5	0.9	0.6
PgE004	67820	68140	PgE004_g005_t01	.	321	1	Histone acetyltransferase MYST4			1.7	0	0	0	0
PgE004	73946	91850	PgE004_g006_t01	-	2488	13	G2/mitotic-specific cyclin-B3	AgE01_g004_t02		22.6	19.4	12.7	0.8	0
PgE005	10748	15651	PgE005_g001_t04	-	784	5	Ancylostoma secreted protein	AgE01_g050_t10	MSTRG.4173.6,MSTRG.22164.10,MSTRG.23784.1,MSTRG.23482.17,MSTRG.24004.1,MSTRG.5763.1	120.5	0	0.1	2.8	1.4
PgE005	21108	35125	PgE005_g002_t02	+	2073	9	pepsin inhibitor dit33	AgE01_g051_t02	MSTRG.23309.2,MSTRG.23309.2,MSTRG.23309.2	59.9	0	0.8	0.6	0.5
PgE005	43494	50373	PgE005_g003_t02	-	726	7	Telomerase-binding protein EST1A	AgE01_g053_t05,AgE01_g053_t05,AgE01_g053_t05,AgE01_g053_t05,AgE01_g053_t05		31.9	0.7	0.1	0.1	0.1
PgE005	53321	66962	PgE005_g004_t04	-	938	4	rnase h family protein		MSTRG.11668.1	127	0	3	4.8	1.2
PgE005	68078	68781	PgE005_g005_t01	.	704	1	hypothetical protein			0.2	0	0	0	0
PgE005	76478	77098	PgE005_g006_t01	.	621	1	Transposon-derived protein			2.8	0	0	0	0
PgE005	78024	84857	PgE005_g007_t04	+	1333	8	HORMA domain-containing protein 1	AgE01_g056_t01,AgE25_g010_t01	MSTRG.21609.1,MSTRG.12261.12	4.5	9.7	10	2.4	0
PgE006	9	6584	PgE006_g001_t01	+	2809	5	eukaryotic translation initiation factor 2 subunit 2	AgE47_g005_t02,AgE47_g007_t01		38.8	0	2.4	0.8	0.4
PgE006	10807	12803	PgE006_g002_t01	+	1420	3	hypothetical protein	AgB20_g002_t01		2.9	0.3	0.5	0	0
PgE006	13879	14196	PgE006_g003_t01	+	318	1	hypothetical protein		MSTRG.16484.4,MSTRG.17936.1	0	0	9	0	0
PgE006	19064	31228	PgE006_g004_t02	+	7573	6	hypothetical protein	AgE03_g033_t02		45.1	0.2	0	1	0.4
PgE006	32235	44335	PgE006_g005_t02	-	1079	8	hypothetical protein	AgE03_g009_t03	MSTRG.22509.4	92.8	0	0.2	1.3	1.4
PgE006	50171	77473	PgE006_g006_t06	-	3639	15	LINE-1 reverse transcriptase	AgB22X_g003_t04	MSTRG.7997.22,MSTRG.21687.6,MSTRG.21315.1,MSTRG.21315.1	39.8	15.5	14.1	0.1	0.2
PgE006	60336	68169	PgE006_g007_t01	+	6657	5	tudor domain containing protein	AgE10_g006_t11		14.2	0.5	0.6	0.4	0.2
PgE006	70418	75366	PgE006_g008_t01	.	4949	1	tudor domain containing protein	AgE10_g006_t11	MSTRG.7997.22	7.7	0.4	0.2	0.2	0
PgE006	77717	78726	PgE006_g009_t01	.	1010	1	Transposon-derived protein	AgE80_g001_t01,AgB12_g001_t01		0.5	0	0	0	0
PgE007	9457	17808	PgE007_g001_t01	-	3967	8	Tubulin alpha chain	AgE01_g014_t01,AgE31_g003_t01	MSTRG.21951.9,MSTRG.22771.4,MSTRG.22951.3,MSTRG.22951.3,MSTRG.19994.2,MSTRG.19994.2,MSTRG.19994.2,MSTRG.21949.2,MSTRG.21949.2,MSTRG.21949.2,MSTRG.21945.1,MSTRG.20046.1,MSTRG.22952.1,MSTRG.22953.1,MSTRG.22953.1	229.5	228.1	156.5	56.7	93.2
PgE007	33867	37854	PgE007_g002_t01	+	3627	2	Zinc finger protein with KRAB and SCAN domains 5			39	2.1	1.9	1	0.3
PgE007	39042	40434	PgE007_g003_t01	+	929	2	Zinc finger protein with KRAB and SCAN domains 5			81.8	0.3	0	0.3	0.3
PgE007	60322	73792	PgE007_g004_t01	-	969	8	40s ribosomal protein s2	AgE45_g004_t04	MSTRG.22817.6,MSTRG.13373.1,MSTRG.23102.3,MSTRG.21314.2,MSTRG.16579.2,MSTRG.20905.1,MSTRG.20596.1,MSTRG.20618.2,MSTRG.23022.1	23	0.2	0.4	0.6	0.1
PgE008	7505	25694	PgE008_g001_t02	+	4811	12	fas-associated factor 1	AgE08_g022_t01	MSTRG.20930.1,MSTRG.20931.1	18.8	2.7	0.6	0.1	0
PgE008	25779	40937	PgE008_g002_t03	+	2725	15	hypothetical protein		MSTRG.23943.1,MSTRG.21948.5,MSTRG.21948.5	65.7	0.1	0.6	1	1.1
PgE008	29508	32279	PgE008_g003_t01	-	2022	3	hypothetical protein			12.2	0	0	0.2	0.1
PgE008	54080	57800	PgE008_g004_t01	-	414	3	hypothetical protein			1	0	0	0	0
PgE008	63550	66291	PgE008_g005_t01	-	390	4	Serine/threonine-protein phosphatase pph-6	AgE07_g011_t02,AgE01_g035_t04,AgE09_g002_t06,AgE05_g011_t03,AgE03_g028_t02,AgB29_g017_t04,AgE12_g002_t11	MSTRG.23250.2,MSTRG.21515.4,MSTRG.22900.4,MSTRG.22337.1,MSTRG.21870.4	5.4	0.2	0	0	0
PgE008	70836	75611	PgE008_g006_t01	+	555	4	hypothetical protein			0.3	0.3	2.1	0	0
PgE009	26	9739	PgE009_g001_t04	-	3943	7	protein lsm14-like protein b	AgE02_g022_t01	MSTRG.8300.1,MSTRG.21298.12,MSTRG.20044.1,MSTRG.21823.2,MSTRG.23154.1	6.8	22.1	11.7	0.4	0.2
PgE009	15880	25428	PgE009_g002_t08	+	1543	5	hypothetical protein	AgE02_g024_t02	MSTRG.22774.1	10.3	54.6	71.6	0.2	0.1
PgE009	31456	38619	PgE009_g003_t01	-	4957	3	hypothetical protein	AgE69_g002_t01	MSTRG.21097.3	5.8	0.2	0.6	0.1	0
PgE009	41596	58616	PgE009_g004_t09	+	6053	11	E3 ubiquitin-protein ligase MARCH8	AgE69_g001_t01	MSTRG.17382.1	53	0.6	1.2	1.4	0.4
PgE009	62441	67591	PgE009_g005_t05	-	2042	6	Polyubiquitin-A		MSTRG.18226.1,MSTRG.18226.1,MSTRG.18226.1,MSTRG.18226.1,MSTRG.18226.1,MSTRG.18226.1,MSTRG.18226.1,MSTRG.18226.1,MSTRG.18226.1,MSTRG.23033.1,MSTRG.23033.1,MSTRG.23033.1	5.4	20.4	16.8	0.8	0.1
PgE009	68909	69711	PgE009_g006_t01	-	339	2	hypothetical protein			1.1	0	0	0	0
PgE010	1590	20013	PgE010_g001_t04	-	2644	18	hypothetical protein	AgE14_g006_t02		196.7	0.2	1.5	4.6	1.6
PgE010	22391	38149	PgE010_g002_t03	-	1929	10	Beta-1,3-galactosyl-O-glycosyl-glycoprotein beta-1,6-N-acetylglucosaminyltransferase 4		MSTRG.23320.1,MSTRG.21663.1,MSTRG.23313.5	53.4	30.4	7.7	1.9	0.8
PgE010	39947	55544	PgE010_g003_t01	-	1806	11	hypothetical protein	AgE14_g001_t02	MSTRG.20616.1	67.7	0.5	0.3	2	0.9
PgE010	64026	74777	PgE010_g004_t04	+	2990	13	Sodium- and chloride-dependent neutral and basic amino acid transporter B(0+)	AgE04_g007_t14	MSTRG.23053.3	50.3	0.1	1.6	1.5	0.5
PgE011	581	6340	PgE011_g001_t01	+	769	5	Tyrosine-protein kinase BAZ1B			3.1	6	2.2	0.4	0
PgE011	13300	15261	PgE011_g002_t01	-	657	3	Alpha-(1,3)-fucosyltransferase C			22.5	0	3.1	1.1	0
PgE011	21305	24530	PgE011_g003_t01	+	2619	3	hypothetical protein			5	0.1	0.3	0.1	0
PgE011	31212	34985	PgE011_g004_t01	-	356	2	hypothetical protein			0.9	4.6	0	0	0
PgE011	34151	34523	PgE011_g005_t01	.	373	1	Retrotransposable element Tf2 155 kDa protein type 1	AgE12_g005_t01,AgE23_g010_t01	MSTRG.18626.6,MSTRG.21881.2,MSTRG.21881.2,MSTRG.23159.1,MSTRG.21606.1	0.3	3.6	0	0	0
PgE011	36385	41240	PgE011_g006_t02	-	706	6	hypothetical protein	AgE01_g030_t03		8	13.9	15.2	0.5	0.4
PgE011	44760	45942	PgE011_g007_t01	.	1183	1	hypothetical protein			1.5	0.7	0	0.2	0
PgE011	48084	50418	PgE011_g008_t01	-	2335	1	hypothetical protein			96	66.5	109.6	40.3	44.6
PgE011	56390	56719	PgE011_g009_t01	-	330	1	hypothetical protein			0	0	0	0	0
PgE011	64411	67572	PgE011_g010_t01	-	564	3	Retrotransposable element Tf2 155 kDa protein type 1	AgB07_g005_t01		1.2	0	0	0	0
PgE012	2201	10445	PgE012_g001_t02	-	8188	2	pantothenate kinase 4			6.7	0	0.1	0.1	0.1
PgE012	2201	10445	PgE012_g002_t01	+	8245	1	pantothenate kinase 4			6.3	0	0.1	0.1	0.2
PgE012	18419	28800	PgE012_g003_t10	+	1513	3	hypothetical protein	AgE07_g009_t01		19.5	0	0	0.9	0.2
PgE012	40486	40746	PgE012_g004_t01	+	261	1	hypothetical protein			1.2	0	0	0	0
PgE012	48520	53954	PgE012_g005_t01	-	4427	3	Tenascin-X			2.8	0.2	1.3	0	0
PgE012	57263	62055	PgE012_g006_t01	-	2200	3	hypothetical protein			3.5	0.1	0.4	0.4	0
PgE012	57854	58225	PgE012_g007_t01	.	372	1	hypothetical protein			3.5	0	0	0	0
PgE012	69081	72381	PgE012_g008_t01	-	516	3	Resistance to inhibitors of cholinesterase protein 3			0	0	0	0	0
PgE013	1966	5233	PgE013_g001_t04	+	2204	2	hypothetical protein			38.4	0.2	0	0.7	0.1
PgE013	32346	68321	PgE013_g002_t04	-	13341	26	60s ribosomal protein l17		MSTRG.18839.5,MSTRG.18839.5,MSTRG.18839.5	25.5	4.1	3.2	0.5	0.2
PgE014	16212	23578	PgE014_g001_t07	+	1090	5	Tubulin alpha chain	AgE01_g014_t01,AgE31_g003_t01	MSTRG.21951.9,MSTRG.22771.4,MSTRG.19994.2,MSTRG.19994.2,MSTRG.22951.3,MSTRG.21945.1,MSTRG.22952.1,MSTRG.22953.1	59.1	169.9	84.3	3.7	2.5
PgE014	24604	30949	PgE014_g002_t01	-	5901	2	Tubulin alpha chain			47.2	31.4	72	19.5	19.6
PgE014	24604	41271	PgE014_g003_t02	+	1877	3	Tubulin alpha chain		MSTRG.21949.2,MSTRG.21951.9	7.5	26	14.6	0.1	0
PgE014	45062	48782	PgE014_g004_t01	-	414	3	hypothetical protein			0.5	0	0	0	0
PgE014	54532	57273	PgE014_g005_t01	-	390	4	Serine/threonine-protein phosphatase pph-6	AgE07_g011_t02,AgE01_g035_t04,AgE09_g002_t06,AgE05_g011_t03,AgE03_g028_t02,AgB29_g017_t04,AgE12_g002_t11	MSTRG.23250.2,MSTRG.21515.4,MSTRG.22900.4,MSTRG.22337.1,MSTRG.21870.4	5.7	0.5	0	0	0
PgE014	61818	66593	PgE014_g006_t01	+	555	4	hypothetical protein			0.3	0.4	1.7	0	0
PgE015	3451	5018	PgE015_g001_t01	+	393	3	Glutamate NMDA receptor-associated protein 1	AgE09_g012_t01	MSTRG.17407.2,MSTRG.22698.1	6.9	0	0	0	0
PgE015	6551	14071	PgE015_g002_t01	-	606	6	hypothetical protein			2.6	0	0	0	0
PgE015	42722	48270	PgE015_g003_t01	-	780	6	Serine/threonine-protein kinase PLK1	AgE09_g008_t03	MSTRG.21708.4	2.7	2.9	5.3	0	0
PgE016	564	11567	PgE016_g001_t01	+	1935	9	Protein ECT2		MSTRG.22204.1,MSTRG.23566.2,MSTRG.23566.2,MSTRG.19724.1,MSTRG.19725.1	10.1	1.4	0.4	0.4	0.2
PgE016	9093	10725	PgE016_g002_t01	+	1633	1	pdz domain-containing protein			7.8	0	0	0	0
PgE016	11640	32631	PgE016_g003_t05	+	2802	14	hypothetical protein	AgE06_g019_t04	MSTRG.10325.2	27.2	0.2	0.7	0.6	0.1
PgE016	35416	67251	PgE016_g004_t02	+	9032	22	Sodium/potassium-transporting ATPase subunit alpha-1	AgE06_g018_t05	MSTRG.23055.2,MSTRG.23055.2	36.8	2.3	1.3	0.6	0.2
PgE016	62803	66274	PgE016_g005_t01	-	2998	2	hypothetical protein			7.4	0.6	1.1	0	0.1
PgE017	2427	3994	PgE017_g001_t01	+	393	3	Glutamate NMDA receptor-associated protein 1	AgE09_g012_t01	MSTRG.17407.2,MSTRG.22698.1	6.3	0	0	0	0
PgE017	5527	13047	PgE017_g002_t01	-	606	6	hypothetical protein			3.2	0	0	0	0
PgE017	41698	47246	PgE017_g003_t01	-	780	6	Serine/threonine-protein kinase PLK1	AgE09_g008_t03	MSTRG.21708.4	2.7	3	3.9	0	0
PgE018	1	2963	PgE018_g001_t01	-	1279	3	hypothetical protein	AgB03_g001_t02		36.8	0	0.1	1.7	1
PgE018	8117	18972	PgE018_g002_t01	+	1837	10	PDZ domain-containing protein GIPC1	AgE68_g001_t03	MSTRG.20906.1,MSTRG.20905.1,MSTRG.20905.1,MSTRG.13359.1	217	0.1	1.7	5.3	3.9
PgE018	35098	38759	PgE018_g003_t01	+	1731	4	major antigen	AgE17_g005_t12	MSTRG.22605.3	29.3	0.1	1	0.5	0.4
PgE019	5519	20436	PgE019_g001_t09	+	1533	8	baculoviral iap repeat-containing protein 6	AgB20_g009_t01,AgB20_g008_t07	MSTRG.23867.1,MSTRG.22482.2,MSTRG.22482.2,MSTRG.24063.1,MSTRG.23519.4	73.4	0	3.8	1.2	0.8
PgE019	26359	43241	PgE019_g002_t05	-	2016	13	Kelch-like protein 10	AgB15X_g001_t02,AgB15X_g001_t02,AgE51_g001_t01,AgE51_g001_t01,AgB21_g001_t02	MSTRG.10150.8,MSTRG.20493.2,MSTRG.20493.2,MSTRG.20493.2,MSTRG.20493.2	90.9	0.5	3.3	2.3	1.1
PgE019	43589	53912	PgE019_g003_t01	+	1920	7	Proteasome subunit alpha type-7	AgB15X_g002_t03		117.4	28	15.9	5.3	1.2
PgE019	58549	66183	PgE019_g004_t01	+	2760	9	Tristetraprolin	AgB15X_g003_t01,AgB20_g012_t05	MSTRG.23483.1,MSTRG.23371.1,MSTRG.17401.1,MSTRG.17223.2,MSTRG.17223.2,MSTRG.21582.1	16.8	145.8	109.6	2.3	0.3
PgE020	317	10225	PgE020_g001_t04	-	1389	6	Tyrosine-protein phosphatase Lar-like protein	AgB20_g013_t01,AgB20_g013_t01	MSTRG.22327.1,MSTRG.22327.1,MSTRG.23872.1,MSTRG.23873.1,MSTRG.23873.1,MSTRG.21920.4,MSTRG.21654.2,MSTRG.20793.1,MSTRG.20010.1,MSTRG.23026.4,MSTRG.18835.3,MSTRG.22716.2,MSTRG.1831.1	23.9	0	0	0	0.2
PgE020	12323	19088	PgE020_g002_t01	-	1537	10	Tristetraprolin	AgB20_g012_t05,AgB15X_g003_t01,AgE04_g017_t01	MSTRG.23483.1,MSTRG.23371.1,MSTRG.17401.1,MSTRG.17223.2,MSTRG.21582.1	1.3	49.3	54.4	0.9	0.1
PgE020	54634	65160	PgE020_g003_t03	-	2418	6	hypothetical protein	AgE04_g039_t05	MSTRG.22656.1	22.5	0	0.1	0.3	0
PgE021	6968	15862	PgE021_g001_t07	-	981	5	Tau-tubulin kinase 1		MSTRG.22673.1	23.9	0.7	0.6	1.1	0.1
PgE021	8	16046	PgE021_g002_t02	+	13896	4	hypothetical protein			7	0.4	0.7	0	0
PgE021	17612	21563	PgE021_g003_t01	-	743	4	hypothetical protein		MSTRG.20431.1,MSTRG.22989.2,MSTRG.22989.2,MSTRG.2307.3	137.4	0	0	1	1.7
PgE021	22730	28710	PgE021_g004_t01	+	650	4	hypothetical protein		MSTRG.23231.2	41.9	0	1.7	3	1.2
PgE021	29348	37399	PgE021_g005_t04	+	2466	8	Serine/threonine-protein kinase	AgB33_g007_t02,AgE06_g006_t01,AgE26_g003_t02,AgB21_g003_t02,AgE05_g002_t01,AgE01_g016_t01,AgE57_g001_t04,AgB26_g001_t02,AgE03_g039_t02,AgE04_g018_t07,AgE03_g026_t04,AgE03_g022_t01,AgB34_g005_t05,AgE22_g012_t05	MSTRG.22167.7,MSTRG.22673.1,MSTRG.17769.3,MSTRG.23052.1,MSTRG.23846.1,MSTRG.22718.1,MSTRG.13368.2,MSTRG.21747.2,MSTRG.13365.1,MSTRG.21745.1,MSTRG.20782.13,MSTRG.20782.13,MSTRG.22376.1,MSTRG.21667.1,MSTRG.20353.1,MSTRG.16874.1,MSTRG.18753.1,MSTRG.19589.1,MSTRG.18388.5,MSTRG.20059.1,MSTRG.23426.4,MSTRG.22403.2,MSTRG.17766.1,MSTRG.21615.1,MSTRG.17933.1,MSTRG.23443.1,MSTRG.22241.1,MSTRG.20409.5,MSTRG…	50.7	2.9	6.3	0.3	0.7
PgE021	44063	54014	PgE021_g006_t03	+	1428	6	Serine/arginine-rich splicing factor 4	AgE06_g003_t03,AgB29_g018_t03	MSTRG.22108.1,MSTRG.18748.3,MSTRG.18748.3,MSTRG.23500.1,MSTRG.8296.2	24.9	1.8	3.5	0.4	0.5
PgE022	6904	13889	PgE022_g001_t06	+	665	4	Transient-receptor-potential-like protein	AgE13_g006_t06	MSTRG.21562.4,MSTRG.21425.12,MSTRG.24007.2	140.9	0.2	2	2.4	1.7
PgE022	16578	33409	PgE022_g002_t06	+	2364	12	Nose resistant to fluoxetine protein 6	AgE13_g005_t05	MSTRG.22184.1,MSTRG.19922.1,MSTRG.22185.1	3.8	77.7	46.2	0.4	0.2
PgE022	15808	16365	PgE022_g003_t01	.	558	1	hypothetical protein			2.5	0	0.9	0	0
PgE022	33559	35074	PgE022_g004_t01	.	1516	1	hypothetical protein			1.5	27.3	8.7	0.2	0.1
PgE022	37347	45663	PgE022_g005_t04	-	2294	8	Protein UBASH3A	AgE08_g011_t02,AgE09_g016_t01	MSTRG.19727.1,MSTRG.19728.1,MSTRG.18546.2,MSTRG.22756.1	26.4	17.2	11.9	0.5	0.1
PgE022	48751	53000	PgE022_g006_t02	+	2008	4	Glycogen synthase kinase-3 beta	AgE47_g003_t06,AgE17_g009_t02	MSTRG.16870.5,MSTRG.7017.1,MSTRG.16581.1	7.7	7.2	2.4	0	0.1
PgE022	53117	57861	PgE022_g007_t01	-	1374	6	Sperm vesicle fusion protein fer-1	AgE02_g038_t02	MSTRG.20045.5	48.7	0	0	1.1	0.8
PgE023	13906	14311	PgE023_g001_t01	.	406	1	hypothetical protein			3.5	0	0	0	0
PgE023	14883	23653	PgE023_g002_t04	-	1480	10	hypothetical protein		MSTRG.21212.1	27.2	8.2	6.8	0.5	0.3
PgE023	24935	41189	PgE023_g003_t02	+	2876	13	Solute carrier family 40 member 1	AgB35X_g003_t02	MSTRG.22281.2,MSTRG.22281.2,MSTRG.22282.1	144.8	0	0.4	0.7	1.3
PgE023	47569	57838	PgE023_g004_t05	+	593	5	hypothetical protein	AgE29_g003_t02,AgE02_g039_t02,AgE11_g004_t04,AgE01_g042_t01	MSTRG.2298.1	36.7	0	0	0.9	0.8
PgE024	6635	20105	PgE024_g001_t01	+	969	8	40s ribosomal protein s2	AgE45_g004_t04	MSTRG.22817.6,MSTRG.13373.1,MSTRG.23102.3,MSTRG.21314.2,MSTRG.16579.2,MSTRG.20905.1,MSTRG.20596.1,MSTRG.20618.2,MSTRG.23022.1	21.9	0.2	0.7	0.3	0.3
PgE025	6226	26134	PgE025_g001_t01	-	2915	8	Casein kinase II subunit alpha	AgE16_g006_t02,AgE17_g009_t02,AgE47_g003_t06,AgE04_g034_t02,AgE06_g013_t01,AgE23_g001_t01	MSTRG.20803.1,MSTRG.23672.1,MSTRG.21423.2,MSTRG.16870.5,MSTRG.16581.1,MSTRG.23808.6,MSTRG.23808.6,MSTRG.23808.6,MSTRG.21893.3,MSTRG.20625.12,MSTRG.20625.12,MSTRG.22069.3,MSTRG.20409.5,MSTRG.21941.1,MSTRG.23332.3,MSTRG.20805.1,MSTRG.12983.2	40.6	19.4	28.4	0.3	0.4
PgE025	34614	44147	PgE025_g002_t01	-	5665	4	hypothetical protein			7.4	0	1.7	0.1	0.1
PgE025	54255	59491	PgE025_g003_t01	+	502	4	hypothetical protein	AgE56_g002_t01	MSTRG.23175.1	113.4	0	0	0	1
PgE026	3720	8669	PgE026_g001_t10	+	321	4	hypothetical protein	AgB29_g011_t02	MSTRG.22959.2,MSTRG.22959.2,MSTRG.23741.2,MSTRG.20175.1	210.2	6.8	1.3	6.7	1.1
PgE026	5395	24878	PgE026_g002_t01	-	5552	18	40S ribosomal protein S19G	AgB29_g009_t10	MSTRG.1828.1	25.8	17.8	4.3	0.7	0.4
PgE026	25469	40962	PgE026_g003_t02	-	1021	9	hypothetical protein	AgB29_g009_t10	MSTRG.1828.1	16.6	47.8	5	0	0.6
PgE026	43577	56009	PgE026_g004_t05	+	2292	8	p40	AgB34_g001_t04,AgB34_g001_t04	MSTRG.20646.1,MSTRG.22412.1,MSTRG.22412.1,MSTRG.20645.1	47.4	0.2	0.1	0.8	0.5
PgE027	12	1832	PgE027_g001_t02	-	1448	3	hypothetical protein			23.1	0	0	0.9	0.3
PgE027	3986	4335	PgE027_g002_t01	.	350	1	hypothetical protein		MSTRG.23278.1,MSTRG.23278.1	0.2	0	3.4	3.4	0
PgE027	10704	39906	PgE027_g003_t01	+	4190	31	Structural maintenance of chromosomes protein 3	AgE03_g018_t01	MSTRG.21620.1,MSTRG.21620.1,MSTRG.21621.1,MSTRG.21621.1,MSTRG.21621.1,MSTRG.20526.1	18.1	24.5	8.9	0.6	0
PgE027	46268	48009	PgE027_g004_t05	+	1306	4	Bromodomain-containing protein 3			6.3	9	5.4	1	0
PgE027	51494	57838	PgE027_g005_t02	-	2093	5	Homeotic protein female sterile	AgE03_g035_t10,AgE03_g038_t01	MSTRG.17953.1,MSTRG.22101.15	48.7	2.3	3.2	0.4	0.3
PgE028	2204	10965	PgE028_g001_t03	-	2304	9	Glycogen synthase kinase-3 beta	AgE47_g003_t06,AgE17_g009_t02,AgE04_g034_t02,AgE16_g006_t02,AgE23_g001_t01,AgE02_g027_t05,AgB29_g016_t02,AgE06_g013_t01,AgE04_g018_t07	MSTRG.16870.5,MSTRG.21423.2,MSTRG.21893.3,MSTRG.20803.1,MSTRG.23672.1,MSTRG.16581.1,MSTRG.20937.1,MSTRG.20937.1,MSTRG.7017.1,MSTRG.20625.12,MSTRG.21941.1,MSTRG.22069.3,MSTRG.20409.5,MSTRG.23332.3,MSTRG.23443.1,MSTRG.22241.1,MSTRG.17933.1	25.5	29.9	13.1	0.7	0.3
PgE028	9249	11329	PgE028_g002_t01	+	665	3	Glycogen synthase kinase-3 beta	AgE47_g003_t06,AgE17_g009_t02	MSTRG.16870.5,MSTRG.7017.1	8.6	23.7	7.7	0	0.1
PgE028	49298	52321	PgE028_g003_t01	-	1441	3	hypothetical protein			2.8	7.4	8	0	0.1
PgE029	998	19130	PgE029_g001_t02	+	2663	20	Tyrosine-protein phosphatase non-receptor type 9	AgE02_g002_t03,AgB20_g013_t01,AgE02_g001_t01	MSTRG.21864.2,MSTRG.1831.1,MSTRG.20010.1,MSTRG.21654.2,MSTRG.22327.1,MSTRG.23873.1,MSTRG.22740.5,MSTRG.22740.5,MSTRG.21920.4,MSTRG.18835.3,MSTRG.20793.1,MSTRG.23026.4,MSTRG.22741.1,MSTRG.23028.1	16.3	368.3	39.1	1.6	0.8
PgE029	21509	27567	PgE029_g002_t01	-	1633	8	msp domain containing protein	AgE02_g005_t06,AgE02_g037_t01,AgE02_g015_t02,AgE02_g017_t01	MSTRG.23491.3,MSTRG.21144.1,MSTRG.21741.1,MSTRG.10800.2,MSTRG.23685.5,MSTRG.7434.2,MSTRG.22367.1,MSTRG.22310.1	104.8	0.1	0.3	1.3	1.4
PgE029	29018	30169	PgE029_g003_t01	-	546	2	hypothetical protein			648.9	2.1	12.9	11.6	7.9
PgE029	40970	48038	PgE029_g004_t03	+	1946	8	tata box-binding protein 1	AgE02_g007_t02		91.6	42.6	8.6	3.5	0.6
PgE030	563	9979	PgE030_g001_t02	-	1704	5	Ubiquitin-conjugating enzyme E2 L3	AgE01_g010_t01,AgB17_g102_t01,AgE06_g010_t01,AgE13_g010_t02,AgE71_g002_t01,AgE02_g008_t05	MSTRG.21511.1,MSTRG.21512.1,MSTRG.17394.1,MSTRG.8297.2,MSTRG.18751.1,MSTRG.13376.1,MSTRG.22259.5,MSTRG.1696.1,MSTRG.18545.1,MSTRG.7436.1,MSTRG.21589.1,MSTRG.16583.3	166.7	0	2.5	1.9	2.1
PgE030	1028	4721	PgE030_g002_t01	.	3694	1	hypothetical protein			9.7	0.2	2.4	0.1	0.1
PgE030	12432	37849	PgE030_g003_t02	-	5606	20	Proteasome activator complex subunit 4		MSTRG.21057.1,MSTRG.21621.1,MSTRG.524.3,MSTRG.524.3	48.1	0.3	1.9	1.4	0.2
PgE030	31876	35758	PgE030_g004_t01	+	3679	3	Proteasome activator complex subunit 4			12.3	0	0.3	0	0
PgE030	45840	53564	PgE030_g005_t06	-	488	5	hypothetical protein	AgE44_g001_t02	MSTRG.22607.2	37.1	0.6	0	0	0.3
PgE031	1621	3201	PgE031_g001_t08	-	962	2	Tyrosinase-like protein tyr-3			2.1	23.3	13.4	1	0.7
PgE031	16559	56257	PgE031_g002_t06	+	5568	30	Proteasome activator complex subunit 4	AgB23_g072_t01	MSTRG.21621.1,MSTRG.21057.1,MSTRG.524.3,MSTRG.524.3,MSTRG.23353.5,MSTRG.21623.1,MSTRG.21623.1	129.4	5.4	5.5	3.7	0.8
PgE032	3	4672	PgE032_g001_t02	+	2845	3	Sperm vesicle fusion protein fer-1		MSTRG.20437.1,MSTRG.21099.1	5.3	1.3	0.4	0.6	0
PgE032	34730	45916	PgE032_g002_t18	-	2325	7	Sperm vesicle fusion protein fer-1	AgE02_g034_t08	MSTRG.20439.1,MSTRG.21099.1	15	0.3	2.1	0.3	0.2
PgE032	47922	50182	PgE032_g003_t01	-	508	4	Sperm vesicle fusion protein fer-1		MSTRG.20439.1,MSTRG.24106.2	23.7	0	0.5	0	0
PgE032	48525	49169	PgE032_g004_t02	-	444	2	hypothetical protein			4	0	0	0	0
PgE033	7139	16089	PgE033_g001_t05	+	1637	6	ubiquitin-conjugating enzyme e2 2		MSTRG.19197.3,MSTRG.18623.4,MSTRG.18623.4	3.4	8.6	1.4	0	0.1
PgE033	19928	37740	PgE033_g002_t02	-	2768	13	dna-directed rna polymerase i subunit rpa1			0.6	1.3	1.8	0	0
PgE033	38385	40342	PgE033_g003_t01	+	920	2	hypothetical protein			77.1	0	0	1.1	0.8
PgE033	41223	41907	PgE033_g004_t01	+	369	2	Tyrosine-protein kinase Fer	AgE12_g003_t14,AgE12_g003_t14		2.7	0.4	0	0	0
PgE033	44923	54087	PgE033_g005_t03	+	1947	6	Serine/threonine-protein phosphatase PP1		MSTRG.22530.1,MSTRG.23756.1	59.3	0	0.5	1.5	0.7
PgE034	69	1129	PgE034_g001_t01	+	488	2	Cyclin-B1-2	AgB29_g006_t04		6.9	15.4	28	0	0
PgE034	7013	39860	PgE034_g002_t03	-	3113	22	Sodium/chloride cotransporter 3	AgB29_g003_t02,AgB29_g004_t23		32.8	0.5	2	0.6	0.3
PgE034	42516	47571	PgE034_g003_t03	+	749	3	Tau-tubulin kinase 2	AgB29_g001_t15	MSTRG.22403.2	59.5	0	0	0.9	0.7
PgE034	48500	50629	PgE034_g004_t01	+	320	4	Serine/threonine-protein kinase	AgB21_g003_t02,AgE05_g002_t01,AgB26_g001_t02	MSTRG.22403.2,MSTRG.21667.1,MSTRG.22718.1,MSTRG.23052.1,MSTRG.20782.13,MSTRG.20059.1,MSTRG.17769.3,MSTRG.23426.4,MSTRG.13365.1,MSTRG.23846.1	234.5	0	0.3	6.2	5.2
PgE035	936	10896	PgE035_g001_t02	-	3282	8	ventricular myosin heavy chain-like protein			96.9	113.7	75.1	29.2	40.5
PgE035	21005	35479	PgE035_g002_t08	+	4250	13	nuclear receptor-binding protein	AgE29_g002_t02,AgE02_g027_t05	MSTRG.20187.3,MSTRG.18317.15,MSTRG.17933.1,MSTRG.23443.1	8.6	12.8	6.5	1	0.1
PgE035	46917	50347	PgE035_g003_t03	+	663	2	NEDD8			165.5	5.8	4.6	3.7	1.2
PgE035	46328	47280	PgE035_g004_t01	-	774	2	NEDD8			21.1	0.8	0.2	0	0.2
PgE036	1720	23792	PgE036_g001_t03	-	3115	11	hypothetical protein	AgE07_g004_t04,AgE11_g002_t03,AgE11_g001_t01,AgE11_g001_t01	MSTRG.21252.1,MSTRG.17934.6,MSTRG.22383.1,MSTRG.22868.1,MSTRG.22868.1,MSTRG.21254.2,MSTRG.21255.8,MSTRG.21255.8,MSTRG.4189.1,MSTRG.23883.1	38.1	0	0	0.7	0.4
PgE036	30876	41488	PgE036_g002_t02	+	4119	9	protein ariadne-1	AgE35_g006_t02	MSTRG.19200.2	14.2	7.4	6	0.1	0.2
PgE036	45455	47452	PgE036_g003_t03	-	750	3	centrosome-associated protein			15.2	43.4	34.6	0	0
PgE037	16109	33847	PgE037_g001_t04	-	2011	13	Condensin complex subunit 3	AgB03_g002_t07	MSTRG.20490.2,MSTRG.20491.8	9.7	34.3	20.8	0.1	0.1
PgE037	6	4564	PgE037_g002_t01	+	2965	4	hypothetical protein	AgB03_g001_t02		31.3	8.3	8.7	1.2	0.2
PgE037	36546	43968	PgE037_g003_t01	+	2859	6	Arylacetamide deacetylase-like protein	AgB03_g006_t01		30	281.9	117.3	3.8	1.5
PgE038	15	2672	PgE038_g001_t02	+	633	3	Solute carrier family 22 member 6	AgE01_g057_t03		49.6	0	0	0.2	0.1
PgE038	5016	5551	PgE038_g002_t01	.	536	1	hypothetical protein			2.1	0	0	0	0
PgE038	6453	10720	PgE038_g003_t05	-	1139	5	hypothetical protein	AgE01_g039_t01	MSTRG.17740.1	106	0	0	1	0.7
PgE038	17160	32050	PgE038_g004_t01	+	2525	13	eukaryotic translation initiation factor 3 subunit i	AgE01_g040_t03,AgE01_g040_t03,AgE04_g032_t03	MSTRG.18407.4	15.4	57.9	20.2	0	0.4
PgE038	33394	40822	PgE038_g005_t01	-	1305	3	4-hydroxybenzoate			1	1.8	0.1	0	0
PgE038	42078	46259	PgE038_g006_t01	-	570	5	Retrotransposable element Tf2 155 kDa protein type 1	AgE14_g010_t04		0.3	0	0	0	0
PgE039	2412	5063	PgE039_g001_t01	+	1038	4	hypothetical protein		MSTRG.21871.1,MSTRG.22319.4,MSTRG.22319.4	15.6	0	0	0	0.3
PgE039	8571	21790	PgE039_g002_t01	+	2479	13	hypothetical protein	AgE06_g011_t09	MSTRG.21599.1	56.1	0	0.8	0.8	0.3
PgE039	24235	30674	PgE039_g003_t02	+	1871	8	Proto-oncogene serine/threonine-protein kinase pim-1	AgE06_g013_t01,AgB29_g005_t02,AgE23_g001_t01,AgE04_g018_t07,AgE16_g006_t02,AgE04_g034_t02,AgB21_g003_t02	MSTRG.12983.2,MSTRG.21875.2,MSTRG.21875.2,MSTRG.21875.2,MSTRG.12984.2,MSTRG.12984.2,MSTRG.12984.2,MSTRG.21876.1,MSTRG.21941.1,MSTRG.22069.3,MSTRG.16581.1,MSTRG.22241.1,MSTRG.20409.5,MSTRG.21893.3,MSTRG.20803.1	3.6	80.7	64.5	1.2	0.7
PgE039	30765	31831	PgE039_g004_t01	.	1067	1	hypothetical protein			3.7	65.7	26.4	0	0
PgE039	34050	50094	PgE039_g005_t03	-	2448	13	Propionyl-CoA carboxylase beta chain	AgE06_g014_t03	MSTRG.21397.2,MSTRG.21095.1	504.5	53.1	45.8	10.8	4.9
PgE039	41886	45195	PgE039_g006_t01	.	3310	1	Propionyl-CoA carboxylase beta chain			22.2	1.6	2.6	0	0.2
PgE040	3068	9246	PgE040_g001_t07	-	2828	9	Tubulin alpha-2 chain	AgE01_g014_t01,AgE01_g014_t01,AgE31_g003_t01,AgE31_g003_t01	MSTRG.21951.9,MSTRG.21951.9,MSTRG.22771.4,MSTRG.22771.4,MSTRG.22951.3,MSTRG.22951.3,MSTRG.22951.3,MSTRG.19994.2,MSTRG.19994.2,MSTRG.21949.2,MSTRG.21949.2,MSTRG.21949.2,MSTRG.21949.2,MSTRG.20046.1,MSTRG.22953.1,MSTRG.22953.1	18.5	443.9	97.3	2.2	1
PgE040	12337	26819	PgE040_g002_t04	+	6388	11	hypothetical protein	AgE01_g015_t01		75.9	0.1	1.3	1	0.6
PgE040	41573	43822	PgE040_g003_t12	+	782	2	serine threonine-protein kinase	AgE01_g016_t01	MSTRG.16874.1	103.1	5.4	1.5	2.7	1.2
PgE041	4	3665	PgE041_g001_t02	-	1328	3	protein ubash3a-like protein	AgE09_g016_t01,AgE08_g011_t02	MSTRG.18546.2	11.6	0.3	1.3	0.1	0.1
PgE041	6663	7021	PgE041_g002_t01	.	359	1	hypothetical protein			1	0	0.9	0	0
PgE041	9757	12783	PgE041_g003_t03	-	1418	2	Ubiquitin-associated and SH3 domain-containing protein B	AgE09_g016_t01	MSTRG.18546.2	29.2	0	0	0.6	0.1
PgE041	18985	30318	PgE041_g004_t02	+	1755	10	nuclear migration and anchoring protein unc-84	AgE04_g012_t01,AgE09_g015_t01	MSTRG.23132.1,MSTRG.23131.2	6.5	31.8	32.3	0.8	0.2
PgE041	40227	43906	PgE041_g005_t01	-	864	6	hypothetical protein		MSTRG.17937.1,MSTRG.17936.1	1.4	0	0	0	0
PgE042	964	5017	PgE042_g001_t01	+	785	5	hypothetical protein		MSTRG.17402.1	104.2	0	1	0.4	0.9
PgE042	6170	7804	PgE042_g002_t01	-	738	2	hypothetical protein			17	13.9	12.8	0	0.3
PgE042	7886	8549	PgE042_g003_t01	+	514	2	hypothetical protein		MSTRG.17402.1	176.7	0	0.7	0.1	1.7
PgE042	11553	14647	PgE042_g004_t02	-	407	5	hypothetical protein	AgE08_g007_t05	MSTRG.22572.1,MSTRG.22572.1,MSTRG.22573.1,MSTRG.22842.3,MSTRG.22843.1	13	6.6	0.4	0	0.2
PgE042	20267	32677	PgE042_g005_t01	+	3559	8	Protein FAM69C	AgE50_g003_t03	MSTRG.20611.7,MSTRG.20611.7,MSTRG.20611.7,MSTRG.20612.1,MSTRG.20405.2,MSTRG.20405.2	7.6	3.8	2.5	0.1	0
PgE042	33414	37324	PgE042_g006_t01	+	3911	1	hypothetical protein			3.9	0	0.5	0	0
PgE042	43913	46416	PgE042_g007_t01	+	2393	2	E3 ubiquitin ligase complex SCF subunit sconC			5	1.2	33.8	0.3	0
PgE043	2409	2671	PgE043_g001_t01	.	263	1	Casein kinase II subunit alpha	AgE16_g006_t02	MSTRG.20803.1,MSTRG.23672.1,MSTRG.23808.6	3	0	0	0	0
PgE043	3824	13223	PgE043_g002_t01	-	2019	4	low affinity immunoglobulin epsilon fc receptor	AgE16_g003_t03	MSTRG.21637.1	58.5	0	2.8	0.7	0.7
PgE043	23129	27388	PgE043_g003_t01	-	461	4	hypothetical protein	AgE56_g003_t05	MSTRG.23522.1,MSTRG.24281.1	531.9	0.3	0	6.4	6.9
PgE043	29355	37123	PgE043_g004_t02	-	1454	7	Serine/threonine-protein phosphatase PP1	AgE09_g002_t06,AgE05_g011_t03,AgE01_g035_t04,AgE03_g028_t02,AgE07_g011_t02,AgB29_g017_t04,AgE12_g002_t11	MSTRG.21870.4,MSTRG.21870.4,MSTRG.22900.4,MSTRG.23250.2,MSTRG.22337.1,MSTRG.23946.1,MSTRG.21515.4,MSTRG.21515.4,MSTRG.13356.2,MSTRG.13356.2,MSTRG.13356.2,MSTRG.13356.2,MSTRG.7423.3,MSTRG.22314.2,MSTRG.18840.1	49.3	22.3	14.9	1.6	1.5
PgE043	39779	45607	PgE043_g005_t01	-	863	6	Phospholipase A-2-activating protein	AgE09_g003_t02	MSTRG.23518.1,MSTRG.23518.1	8.4	23.3	8.6	0	0
PgE044	3160	5958	PgE044_g001_t01	-	573	4	pantothenate kinase 4	AgE24_g002_t01		0	0	0	0	0
PgE044	17624	29731	PgE044_g002_t02	-	3024	7	hypothetical protein	AgE05_g024_t06	MSTRG.19782.1,MSTRG.23748.1	6.8	6.3	5	0.4	0.1
PgE044	39688	44754	PgE044_g003_t01	-	1667	8	zinc c2h2 type family protein	AgE05_g022_t01,AgB28X_g019_t01,AgB21_g002_t01,AgE35_g005_t01,AgB32_g001_t01,AgE32_g001_t01,AgE14_g005_t01,AgB08X_g003_t01,AgE22_g003_t01,AgE66_g003_t01,AgE03_g006_t01,AgB28X_g016_t01,AgB08X_g002_t01,AgB16X_g004_t01,AgE03_g007_t01,AgB09X_g154_t02,AgE75_g001_t01,AgE47_g001_t02,AgE73_g002_t01,AgB32_g002_t01		1.6	4.3	7	0	0
PgE045	624	6010	PgE045_g001_t01	+	1415	5	Ubiquitin-conjugating enzyme E2 J2	AgE11_g008_t06		12.4	5.4	4.2	1.7	0.5
PgE045	14918	31729	PgE045_g002_t05	-	3156	10	26S proteasome non-ATPase regulatory subunit 4	AgE11_g006_t01,AgE04_g036_t02	MSTRG.23886.4,MSTRG.23886.4	55.7	0.1	2.4	0.9	0.6
PgE045	37023	43076	PgE045_g003_t02	-	1683	5	hypothetical protein			44.4	0.1	0	0.8	0.6
PgE046	5498	19261	PgE046_g001_t03	-	1587	9	Hsp90 co-chaperone cdc37	AgB14_g001_t01	MSTRG.21299.1,MSTRG.21519.4,MSTRG.22792.3	309.1	54.9	48.2	5.7	3.9
PgE046	25700	41291	PgE046_g002_t01	-	1185	9	Sodium/potassium-transporting ATPase subunit beta-1		MSTRG.22808.1	63.3	1.3	1.5	1.4	1.1
PgE047	10806	22252	PgE047_g001_t03	-	359	6	hypothetical protein		MSTRG.21663.1	85.1	0	0	0.2	2
PgE047	24715	39866	PgE047_g002_t03	+	2405	13	phosphoenolpyruvate carboxykinase	AgB31X_g008_t10	MSTRG.21638.1,MSTRG.21638.1,MSTRG.21746.1	91.2	2.5	12.2	0.7	0.8
PgE047	28623	29442	PgE047_g003_t01	.	820	1	hypothetical protein			14.5	0	0.9	0	0
PgE048	302	5423	PgE048_g001_t02	-	4466	2	hypothetical protein			4.7	0	0.1	0	0
PgE048	8262	22350	PgE048_g002_t02	+	2054	12	Excitatory amino acid transporter	AgE04_g019_t01,AgB04_g462_t03	MSTRG.19190.1,MSTRG.17757.1,MSTRG.17757.1,MSTRG.21657.6,MSTRG.21657.6,MSTRG.23780.3,MSTRG.23780.3,MSTRG.21658.1	123.3	20.9	13	3.5	1.3
PgE048	29526	36123	PgE048_g003_t01	-	2235	5	hypothetical protein		MSTRG.23752.2,MSTRG.23753.1,MSTRG.23937.1	14.8	0.3	0.9	0.3	0.3
PgE049	178	41534	PgE049_g001_t01	-	6015	34	DNA-directed RNA polymerase II subunit RPB1	AgB03_g007_t04	MSTRG.20180.1	25.4	1.4	1.9	0.6	0.1
PgE050	3490	10625	PgE050_g001_t02	-	2516	8	2-amino-3-ketobutyrate coenzyme A ligase	AgE22_g009_t01,AgE22_g011_t01,AgE14_g008_t07	MSTRG.10154.1,MSTRG.22468.1,MSTRG.10155.1	163.9	1.4	2	2.9	1.2
PgE050	12789	13589	PgE050_g002_t01	+	303	2	multidrug resistance protein pgp-3			0	0.3	0	0	0
PgE050	29313	30710	PgE050_g003_t01	+	915	3	Tyrosine-protein kinase Fer			6163.4	1.4	12.6	141.6	70.3
PgE051	255	6019	PgE051_g001_t01	-	1751	8	chitin synthase 8	AgB07_g007_t05	MSTRG.23261.1,MSTRG.23081.1	13.7	418.9	205.5	4.7	1.3
PgE051	22110	27788	PgE051_g002_t08	+	2077	8	hypothetical protein			22.1	26.4	5.7	0.6	0.2
PgE051	30507	31646	PgE051_g003_t01	-	327	2	Filamin-A			3.1	22	2.1	0	0
PgE051	32376	34124	PgE051_g004_t01	-	246	2	Zinc finger protein 345		MSTRG.22804.7	4	5	0	0	0
PgE052	11426	32372	PgE052_g001_t04	-	2399	12	Equilibrative nucleoside transporter 3	AgE18_g001_t06	MSTRG.20520.1,MSTRG.22385.2,MSTRG.22385.2,MSTRG.22385.2,MSTRG.22385.2,MSTRG.22386.1,MSTRG.22386.1,MSTRG.21735.1	41.3	0.5	2.1	1.5	0.2
PgE052	34707	39014	PgE052_g002_t01	+	596	4	Homeobox protein ceh-18	AgE18_g002_t01		67.1	0	0	0	0
PgE053	86	6421	PgE053_g001_t02	-	1027	6	hypothetical protein	AgB01_g833_t04	MSTRG.10841.1	25.1	194.4	63.6	0.3	0.2
PgE053	7160	21052	PgE053_g002_t04	+	2113	12	ubiquitin carboxyl-terminal hydrolase 7	AgB01_g832_t01,AgB02_g278_t01,AgE23_g008_t01,AgE26_g002_t01,AgB27X_g021_t05	MSTRG.20929.1,MSTRG.21577.15	24.7	19.7	16.4	0.5	0.1
PgE053	26951	30392	PgE053_g003_t01	-	645	4	hypothetical protein			0.6	0	2	0	0
PgE054	1122	2283	PgE054_g001_t01	-	300	2	Transcription activator BRG1			0.2	3.3	0	0	0
PgE054	9906	12247	PgE054_g002_t01	-	376	4	Protein VPRBP			3.7	2.3	2	0	0
PgE054	20829	28942	PgE054_g003_t01	-	4816	6	Transcription activator BRG1			2.3	3.1	2.8	0.1	0.1
PgE054	30303	32967	PgE054_g004_t02	-	625	3	Protein UBASH3A			41.4	0	0	0	0.5
PgE054	33746	36511	PgE054_g005_t01	-	505	6	protein ubash3a-like protein	AgE09_g016_t01	MSTRG.18546.2	42.4	0	0.2	0	1.2
PgE055	4	3683	PgE055_g001_t01	-	2818	2	hypothetical protein			2.8	9.9	3.3	0.1	0
PgE055	4	4407	PgE055_g002_t03	+	3255	3	hypothetical protein			2.4	7.9	3.4	0.2	0
PgE055	4529	17380	PgE055_g003_t02	+	3992	12	f-box domain-containing protein			3.6	18.8	13.8	0.1	0
PgE055	17982	21630	PgE055_g004_t02	-	2034	3	hypothetical protein			3.1	4.7	12.1	0	0
PgE055	25559	26678	PgE055_g005_t06	+	1120	1	hypothetical protein			42.4	256.8	248.9	3.7	0.6
PgE056	1457	5666	PgE056_g001_t01	+	663	4	hypothetical protein	AgB24_g007_t01		3.4	0.9	0	0.8	0
PgE056	10831	18895	PgE056_g002_t02	-	1852	11	serine threonine-protein phosphatase pp1 isozyme 1	AgE03_g028_t02,AgE09_g002_t06,AgB29_g017_t04,AgE01_g035_t04,AgE05_g011_t03,AgE07_g011_t02,AgE12_g002_t11	MSTRG.22900.4,MSTRG.22900.4,MSTRG.22337.1,MSTRG.21515.4,MSTRG.21515.4,MSTRG.23250.2,MSTRG.21870.4,MSTRG.7423.3,MSTRG.23946.1,MSTRG.18840.1	96	2.9	7.8	2.6	1
PgE056	28965	36812	PgE056_g003_t06	+	2011	9	Tyrosine-protein kinase Fps85D	AgE03_g026_t04,AgE12_g003_t14,AgE03_g022_t01,AgE04_g018_t07,AgE02_g027_t05,AgB34_g005_t05,AgB29_g016_t02,AgE63_g004_t06,AgE04_g029_t08,AgB33_g008_t01,AgE23_g001_t01,AgE07_g012_t01,AgE47_g003_t06	MSTRG.23400.4,MSTRG.7427.1,MSTRG.23443.1,MSTRG.21580.2,MSTRG.19994.2,MSTRG.19994.2,MSTRG.17933.1,MSTRG.23125.4,MSTRG.23796.1,MSTRG.18317.15,MSTRG.19573.8,MSTRG.19573.8,MSTRG.23481.2,MSTRG.21090.8,MSTRG.21090.8,MSTRG.22069.3,MSTRG.22241.1,MSTRG.16581.1,MSTRG.23265.1,MSTRG.21941.1,MSTRG.20759.5,MSTRG.11670.1,MSTRG.11670.1,MSTRG.8296.2,MSTRG.23264.1,MSTRG.23264.1,MSTRG.20409.5,MSTRG.16870.5	117.7	0	0.5	1.8	1.3
PgE057	1603	10795	PgE057_g001_t03	-	2570	6	hypothetical protein	AgE18_g006_t01	MSTRG.24298.2,MSTRG.24298.2	162	0	4	2.6	1.4
PgE057	10895	11479	PgE057_g002_t01	.	585	1	hypothetical protein			2.7	0	0	0	0
PgE057	29361	29963	PgE057_g003_t02	-	429	2	hypothetical protein			60.4	0	10.4	2	0.8
PgE058	14	1035	PgE058_g001_t01	.	1022	1	hypothetical protein			34.4	77.5	59.7	3.4	2.8
PgE058	935	1513	PgE058_g002_t01	+	345	2	hypothetical protein			0.4	0	1.9	0	0
PgE058	6011	8142	PgE058_g003_t04	+	910	4	hypothetical protein	AgE85_g001_t01	MSTRG.16873.1	16.4	1.1	4.2	0	0.3
PgE058	16129	21274	PgE058_g004_t01	-	2136	3	hypothetical protein			2.8	0	0	0	0
PgE059	1828	3022	PgE059_g001_t01	+	804	2	hypothetical protein	AgB20_g002_t01	MSTRG.23278.1,MSTRG.23278.1,MSTRG.17764.1,MSTRG.22206.1,MSTRG.16716.1,MSTRG.16716.1	0.1	0.1	0.2	0	0
PgE059	6833	7154	PgE059_g002_t01	.	322	1	Retrotransposable element Tf2 155 kDa protein type 1	AgB07_g005_t01	MSTRG.21881.2,MSTRG.21606.1	2.6	1.3	0	0	0
PgE059	7236	9624	PgE059_g003_t01	.	2389	1	Retrotransposable element Tf2 155 kDa protein type 1	AgE08_g019_t01		0.2	2.1	0	0.2	0
PgE059	9801	10875	PgE059_g004_t01	.	1075	1	gag-pol polyprotein	AgB11_g003_t03	MSTRG.22574.6,MSTRG.22392.9,MSTRG.24235.1,MSTRG.24236.1,MSTRG.18626.6,MSTRG.21360.1,MSTRG.21360.1	2.2	4.5	0	0	0
PgE059	12898	14781	PgE059_g005_t01	+	550	4	Cytoplasmic FMR1-interacting protein	AgE06_g007_t07,AgE19_g001_t02		2.3	0.3	2	0	0
PgE059	20302	25538	PgE059_g006_t03	+	3445	3	Cytoplasmic FMR1-interacting protein			1.3	1.1	1.1	0	0
PgE059	26230	32368	PgE059_g007_t01	-	1449	4	Tau-tubulin kinase 1	AgE06_g006_t01,AgE26_g003_t02	MSTRG.22673.1,MSTRG.17769.3	62.5	25.7	18	1.3	0.7
PgE060	2	12426	PgE060_g001_t01	-	5090	10	hypothetical protein			69.4	24.1	40.2	14.9	16.9
PgE060	22681	36233	PgE060_g002_t04	-	5778	3	atp-dependent rna helicase dhx8			53.4	31	70.7	21.2	20.3
PgE061	10625	18932	PgE061_g001_t06	-	892	7	hypothetical protein	AgE18_g007_t06,AgB20_g010_t01	MSTRG.20439.1,MSTRG.10846.1,MSTRG.17403.3	309.5	0.6	3.2	8.8	3.7
PgE061	25325	35523	PgE061_g002_t01	+	2753	4	hypothetical protein			2.8	0.4	0	0	0.2
PgE061	29106	31442	PgE061_g003_t01	-	596	3	hypothetical protein			11.1	0	0	0	0.5
PgE062	1047	16350	PgE062_g001_t02	-	1940	14	Phospholipase A-2-activating protein	AgE09_g003_t02	MSTRG.23590.11,MSTRG.23590.11,MSTRG.23518.1	28	58.3	25.6	2.5	0
PgE063	55	636	PgE063_g001_t01	+	582	1	hypothetical protein	AgE22_g001_t03	MSTRG.23967.1,MSTRG.21160.1,MSTRG.24101.5,MSTRG.22377.1,MSTRG.22983.6,MSTRG.23814.1	1.7	0	0	0	0
PgE063	3650	22269	PgE063_g002_t07	-	3169	15	eukaryotic translation initiation factor 3 subunit c	AgE03_g023_t02,AgE03_g023_t02		46.6	3.4	2.4	0.7	0
PgE063	2536	13061	PgE063_g003_t01	+	8876	2	Eukaryotic translation initiation factor 3 subunit C			10.2	0.3	0.9	0	0
PgE063	23378	32734	PgE063_g004_t02	+	1968	8	Tyrosine-protein kinase Fer	AgE03_g022_t01,AgE03_g026_t04,AgE02_g027_t05,AgB34_g005_t05,AgE04_g018_t07,AgB29_g016_t02,AgE12_g003_t14,AgE04_g029_t08,AgE07_g012_t01	MSTRG.23400.4,MSTRG.23443.1,MSTRG.23796.1,MSTRG.7427.1,MSTRG.19994.2,MSTRG.19994.2,MSTRG.17933.1,MSTRG.23125.4,MSTRG.19573.8,MSTRG.19573.8,MSTRG.21090.8,MSTRG.21580.2,MSTRG.18317.15,MSTRG.22241.1,MSTRG.16581.1,MSTRG.22069.3,MSTRG.20759.5,MSTRG.8296.2,MSTRG.21941.1,MSTRG.16870.5	138.3	6.3	0.3	3.3	0.5
PgE064	764	4865	PgE064_g001_t01	+	295	4	hypothetical protein	AgE08_g004_t01	MSTRG.21301.4	113.5	0	0.6	3.8	1.7
PgE064	20238	26679	PgE064_g002_t02	+	1504	6	Peptidyl-prolyl cis-trans isomerase 3	AgE08_g008_t03,AgB28X_g027_t01	MSTRG.22178.1,MSTRG.21630.5,MSTRG.22682.1,MSTRG.22680.1	89.1	2.2	1.2	0.5	0.4
PgE065	25090	25853	PgE065_g001_t01	+	411	2	potassium voltage-gated channel protein shaw			1.6	0.5	3.3	0	0.8
PgE065	30319	34219	PgE065_g002_t01	+	1687	5	Catechol O-methyltransferase domain-containing protein 1			3	7.6	2.9	3.4	28.5
PgE066	150	935	PgE066_g001_t01	-	155	2	hypothetical protein			0	0	0	0	0
PgE066	23207	33555	PgE066_g002_t09	+	1262	7	Abhydrolase domain-containing protein		MSTRG.22556.1,MSTRG.22246.3	115	0.6	0.4	1.6	0.6
PgE067	3597	11747	PgE067_g001_t05	-	3545	5	Methylmalonyl-CoA epimerase	AgE03_g012_t04	MSTRG.10156.1	233.1	0.1	1.1	5.5	2.3
PgE067	12125	28888	PgE067_g002_t01	+	1791	11	hypothetical protein	AgE03_g013_t01	MSTRG.7432.3	205.3	0.3	2.7	3.4	3
PgE067	17413	19247	PgE067_g003_t01	+	264	2	Protein phosphatase 1 regulatory subunit 7	AgE04_g035_t02	MSTRG.21892.1	78.2	0	6	1.2	0
PgE067	19343	26085	PgE067_g004_t01	+	456	4	Protein phosphatase 1 regulatory subunit 7	AgE04_g035_t02,AgE04_g035_t02,AgE04_g035_t02	MSTRG.21892.1,MSTRG.21892.1,MSTRG.21892.1,MSTRG.22167.7	107.7	0	0.6	0	1.2
PgE068	27	2634	PgE068_g001_t01	-	1060	4	RecName: Full=Ovarian abundant message protein; Short=Protein OAM		MSTRG.22777.1,MSTRG.21148.7,MSTRG.21148.7,MSTRG.17383.1,MSTRG.22778.4,MSTRG.22778.4,MSTRG.22778.4,MSTRG.17380.1,MSTRG.22356.1,MSTRG.22356.1,MSTRG.17386.1,MSTRG.17386.1,MSTRG.17379.1,MSTRG.17379.1,MSTRG.21321.1,MSTRG.21321.1,MSTRG.21321.1,MSTRG.23216.1,MSTRG.23216.1,MSTRG.22353.6,MSTRG.22779.1,MSTRG.23217.2	0.4	103	21	5	2.1
PgE068	661	1383	PgE068_g002_t01	+	552	2	RecName: Full=Ovarian abundant message protein; Short=Protein OAM		MSTRG.22777.1,MSTRG.17383.1,MSTRG.21148.7,MSTRG.21148.7,MSTRG.22778.4,MSTRG.22778.4,MSTRG.22778.4,MSTRG.22778.4,MSTRG.17380.1,MSTRG.22356.1,MSTRG.22356.1,MSTRG.17386.1,MSTRG.17386.1,MSTRG.17386.1,MSTRG.17379.1,MSTRG.17379.1,MSTRG.21321.1,MSTRG.21321.1,MSTRG.21321.1,MSTRG.23216.1,MSTRG.23216.1,MSTRG.22353.6,MSTRG.23217.2,MSTRG.22779.1	0	66.4	9.9	2.9	1.1
PgE068	5794	10760	PgE068_g003_t01	+	246	4	hypothetical protein	AgE56_g003_t05		232	0	0	2.6	2.8
PgE068	12140	20771	PgE068_g004_t02	-	1672	7	pdz domain containing protein	AgE24_g008_t03	MSTRG.10153.1,MSTRG.23893.1,MSTRG.19583.3,MSTRG.20164.1,MSTRG.4191.1,MSTRG.23256.1,MSTRG.19567.1,MSTRG.23582.7	93.1	0	0.1	3.5	0.7
PgE068	19683	20072	PgE068_g005_t01	.	390	1	hypothetical protein			17.1	0	0	0	0
PgE068	29377	33860	PgE068_g006_t01	-	978	4	PRA1 family protein 3	AgE23_g002_t01		43.8	38	13	0.7	1
PgE069	2292	3716	PgE069_g001_t01	-	408	2	hypothetical protein			58.5	0	0	0	1.1
PgE069	6520	27469	PgE069_g002_t10	-	11368	10	26S proteasome non-ATPase regulatory subunit 2	AgB06_g001_t01	MSTRG.23634.1	14	0	0.5	0.4	0.3
PgE069	3814	5868	PgE069_g003_t01	+	1390	2	26S proteasome non-ATPase regulatory subunit 2		MSTRG.23634.1	17	0	2.1	0	0
PgE069	14219	27469	PgE069_g004_t01	+	11747	2	26S proteasome non-ATPase regulatory subunit 2		MSTRG.23634.1	8.2	0	0.7	0.1	0.1
PgE069	29593	31438	PgE069_g005_t03	-	1619	2	protein-like protein 4			4.4	0.5	1.2	0	0
PgE070	1827	2324	PgE070_g001_t01	+	498	1	hypothetical protein			0.7	0	0	0	0
PgE070	3917	23159	PgE070_g002_t03	-	9140	12	Lamin-1	AgE10_g009_t02	MSTRG.13357.2,MSTRG.18546.2,MSTRG.23123.1,MSTRG.22858.1,MSTRG.21326.1	10.3	0	0.8	0.1	0.1
PgE070	30355	30726	PgE070_g003_t01	+	372	1	hypothetical protein			3.3	2.2	5.2	0	0.2
PgE071	20	10033	PgE071_g001_t04	-	2394	10	hypothetical protein	AgE47_g006_t02	MSTRG.23077.1,MSTRG.23159.1,MSTRG.22962.1,MSTRG.22207.1	25.5	4.1	3.2	1.4	0.4
PgE071	5377	5997	PgE071_g002_t01	.	621	1	hypothetical protein			5.4	0.3	0.7	0.5	0
PgE071	11113	27897	PgE071_g003_t05	-	6640	9	Serine/threonine-protein phosphatase PP1 isozyme 2			71.7	31.2	68	19.8	21.4
PgE072	10540	29947	PgE072_g001_t01	+	7792	11	Megakaryocyte-associated tyrosine-protein kinase		MSTRG.8296.2	21	0	0.3	0.5	0.2
PgE073	2896	14052	PgE073_g001_t02	+	2033	11	Solute carrier family 2	AgB32_g006_t01,AgB02_g473_t01,AgB01_g834_t04	MSTRG.16871.4,MSTRG.23266.3,MSTRG.21333.2,MSTRG.21333.2	121.1	28	17.8	5	1
PgE073	24952	30327	PgE073_g002_t03	-	943	8	Methylmalonyl-CoA mutase	AgB02_g471_t05	MSTRG.21740.5,MSTRG.21740.5	208.8	5.5	2.7	5.8	1.9
PgE074	2083	19385	PgE074_g001_t01	-	3203	10	hypothetical protein		MSTRG.17390.5	44.4	0.3	0.6	0.6	0.7
PgE074	28906	29890	PgE074_g002_t02	-	266	2	hypothetical protein			16.7	1.7	3.8	2	0
PgE074	28915	29889	PgE074_g003_t01	.	975	1	hypothetical protein	AgE01_g023_t07		6.4	1	0.3	1	0
PgE075	20692	26395	PgE075_g001_t15	+	607	6	condensin-2 complex subunit g2		MSTRG.20622.8	6.2	24.8	9.4	0	0.5
PgE075	8165	11457	PgE075_g002_t01	-	2740	3	Condensin-2 complex subunit G2			3.9	11.4	2	0.5	0
PgE075	17352	22348	PgE075_g003_t01	-	4305	3	Condensin-2 complex subunit G2			17.5	13.4	18.5	5.2	6.7
PgE076	307	5912	PgE076_g001_t03	-	1177	8	Serine palmitoyltransferase 2	AgE14_g009_t01,AgE22_g009_t01	MSTRG.22468.1,MSTRG.10154.1	14	9	14.1	0.6	0.1
PgE076	8904	25131	PgE076_g002_t04	+	3316	20	Neurogenic locus notch protein	AgE14_g007_t02		14.4	27.8	13.6	0.3	0.3
PgE077	23	2283	PgE077_g001_t01	+	533	3	Sodium-dependent phosphate transporter 1	AgB32_g005_t04		2.4	0.1	0	0	0
PgE077	3438	5194	PgE077_g002_t01	-	539	2	hypothetical protein			78.5	0	0	1.1	0.2
PgE077	7726	22750	PgE077_g003_t03	+	2328	15	Monocarboxylate transporter 13	AgB32_g004_t04	MSTRG.24307.1,MSTRG.24199.1	43	0.9	0.6	1.8	0.5
PgE077	25605	32580	PgE077_g004_t01	-	2598	7	Endophilin-A2	AgB32_g003_t04	MSTRG.9122.1,MSTRG.21882.1	1.2	35.3	15.1	0.2	0
PgE078	4322	9005	PgE078_g001_t01	+	1515	5	Serine/threonine-protein kinase	AgE05_g002_t01,AgE06_g006_t01,AgB21_g003_t02,AgB26_g001_t02,AgE01_g016_t01,AgB33_g007_t02,AgE26_g003_t02,AgE57_g001_t04,AgE03_g039_t02,AgE22_g012_t05	MSTRG.13365.1,MSTRG.23052.1,MSTRG.13368.2,MSTRG.23846.1,MSTRG.19589.1,MSTRG.22673.1,MSTRG.20353.1,MSTRG.20782.13,MSTRG.20782.13,MSTRG.22718.1,MSTRG.17769.3,MSTRG.16874.1,MSTRG.21667.1,MSTRG.22167.7,MSTRG.20059.1,MSTRG.18753.1,MSTRG.21745.1,MSTRG.23426.4,MSTRG.21747.2,MSTRG.22376.1,MSTRG.18388.5,MSTRG.17766.1,MSTRG.22403.2,MSTRG.13367.1,MSTRG.13370.1,MSTRG.13370.1,MSTRG.21655.5,MSTRG.21615.1,MSTRG…	217.2	0	0.6	3.5	2.3
PgE078	10713	15871	PgE078_g002_t01	-	1035	7	Protein kinase C-like 1	AgB21_g005_t01		0	0.6	0	0.9	1.8
PgE078	15237	15839	PgE078_g003_t01	.	603	1	gag-pol polyprotein	AgB11_g003_t03	MSTRG.22392.9,MSTRG.18626.6,MSTRG.22574.6,MSTRG.24235.1,MSTRG.24236.1,MSTRG.21360.1,MSTRG.21360.1	3.5	0	0	0	0.1
PgE078	20072	29503	PgE078_g004_t01	-	1424	6	hypothetical protein	AgE08_g005_t02	MSTRG.17387.1	54.9	11.3	8.3	1.1	0.6
PgE079	12416	13744	PgE079_g001_t01	+	933	2	hypothetical protein			5.6	23.3	16.4	0.3	0
PgE079	15590	28859	PgE079_g002_t06	-	1811	12	Fem-3 mRNA-binding factor 2	AgE23_g005_t02,AgE13_g013_t01	MSTRG.13373.1,MSTRG.21563.1,MSTRG.20499.1	7	41.8	22.4	0.5	0.4
PgE080	4101	5280	PgE080_g001_t07	-	894	2	insulin-like receptor	AgE25_g008_t02	MSTRG.23044.10,MSTRG.23044.10	150	1.2	5.3	2.4	0.5
PgE080	14174	25646	PgE080_g002_t03	+	3321	5	hypothetical protein	AgE25_g009_t03		8.8	0.3	0.5	0.1	0
PgE080	14231	30951	PgE080_g003_t01	-	11653	3	hypothetical protein	AgE03_g026_t04,AgB34_g005_t05,AgB29_g016_t02,AgE12_g003_t14,AgE04_g018_t07,AgE03_g022_t01,AgE02_g027_t05	MSTRG.18317.15,MSTRG.23400.4,MSTRG.23796.1,MSTRG.7427.1,MSTRG.19994.2,MSTRG.23443.1,MSTRG.21090.8,MSTRG.17933.1,MSTRG.23125.4,MSTRG.21580.2,MSTRG.8296.2,MSTRG.19573.8	6.2	0.2	0.6	0.1	0.1
PgE081	177	1698	PgE081_g001_t01	+	760	2	hypothetical protein			200.2	3.3	0.1	8.5	2.5
PgE081	8950	22022	PgE081_g002_t09	-	3560	8	Phosphoribosyl pyrophosphate synthase-associated protein 2	AgE01_g018_t05	MSTRG.22488.5	48.1	0.2	0.4	1.1	0.4
PgE081	6121	6469	PgE081_g003_t01	.	349	1	Phosphoribosyl pyrophosphate synthase-associated protein 2		MSTRG.22488.5	24.5	1.6	0	0.6	0.5
PgE081	24112	31610	PgE081_g004_t02	-	2106	4	ADP,ATP carrier protein 1	AgE01_g019_t01,AgE03_g027_t02	MSTRG.22328.1,MSTRG.22206.1	131.4	3.4	10.1	2.3	1
PgE081	24112	28233	PgE081_g005_t01	+	4122	1	ADP,ATP carrier protein 1	AgE01_g019_t01,AgE03_g027_t02	MSTRG.22328.1,MSTRG.22206.1	53.1	0.9	3.5	1.2	0.3
PgE081	28360	31010	PgE081_g006_t01	+	2045	3	carrier protein 1	AgE01_g019_t01,AgE03_g027_t02	MSTRG.22328.1,MSTRG.22206.1	42.9	1.2	2.7	0.1	0.2
PgE082	782	23656	PgE082_g001_t01	+	6615	12	putative splicing arginine serine-rich 7		MSTRG.22880.1	1322	8.1	8.7	35.6	13.3
PgE083	1	18659	PgE083_g001_t09	-	1930	13	Protein spinster 1	AgE46_g002_t05,AgE07_g014_t02	MSTRG.2306.1,MSTRG.20604.1,MSTRG.20604.1,MSTRG.20603.6,MSTRG.20603.6,MSTRG.20603.6,MSTRG.22067.1	27.2	0	0.8	1.1	0.1
PgE083	22646	28247	PgE083_g002_t03	+	791	6	hypothetical protein		MSTRG.20056.4	198.3	0.7	1.7	1.3	1.2
PgE084	11	13209	PgE084_g001_t04	-	4029	8	hypothetical protein	AgE02_g040_t02	MSTRG.24094.2,MSTRG.24094.2	118.8	1	1	2.3	1.4
PgE084	14398	19732	PgE084_g002_t03	-	1119	6	hypothetical protein		MSTRG.20008.1	77	0	0	0.9	1.7
PgE084	25995	29420	PgE084_g003_t02	-	1603	3	hypothetical protein			36.3	1	0.6	0.8	0.6
PgE085	12534	16460	PgE085_g001_t10	-	945	7	hypothetical protein			62.5	50.5	160.6	1.6	0.3
PgE085	16956	19386	PgE085_g002_t01	+	516	5	putative cuticular collagen protein			0	0	0	0	13.6
PgE085	19982	26023	PgE085_g003_t01	-	6042	1	hypothetical protein			126.6	57.1	68.5	34.1	52.2
PgE086	826	16254	PgE086_g001_t05	-	5190	7	hypothetical protein	AgE02_g013_t06		18.8	3.3	3.9	0.1	0.1
PgE086	16812	29373	PgE086_g002_t03	+	2565	12	hypothetical protein	AgE02_g014_t04		202	0	0.3	3.7	2
PgE087	7188	12051	PgE087_g001_t02	+	508	4	Zinc finger protein with KRAB and SCAN domains 5	AgE13_g008_t01,AgE13_g009_t01	MSTRG.1694.1	410.1	0	0.7	9.2	3.9
PgE087	18050	20077	PgE087_g002_t01	-	412	2	Zinc finger protein with KRAB and SCAN domains 5			185.2	0	0.2	4.1	1.8
PgE087	18050	20113	PgE087_g003_t01	+	449	2	Zinc finger protein with KRAB and SCAN domains 5	AgE13_g008_t01	MSTRG.1694.1	321.5	0.4	0.2	5	2.4
PgE087	27090	29797	PgE087_g004_t01	-	738	3	Zinc metalloproteinase nas-34			0.3	0	16	0	0
PgE088	403	3605	PgE088_g001_t01	+	1039	4	Serine/threonine-protein phosphatase PP1 isozyme 7	AgB29_g017_t04,AgE03_g028_t02,AgE05_g011_t03,AgE01_g035_t04,AgE09_g002_t06,AgE07_g011_t02,AgE12_g002_t11	MSTRG.22337.1,MSTRG.22900.4,MSTRG.21515.4,MSTRG.23250.2,MSTRG.21870.4,MSTRG.7423.3	124.7	4.7	5.4	2.5	1
PgE088	3204	21859	PgE088_g002_t01	-	1931	13	Tyrosine-protein kinase kin-31	AgB34_g005_t05,AgB29_g016_t02,AgE04_g018_t07,AgE03_g026_t04,AgE03_g022_t01,AgE12_g003_t14,AgE02_g027_t05,AgE04_g029_t08,AgE23_g001_t01,AgE63_g004_t06,AgE07_g012_t01,AgB33_g008_t01,AgE29_g002_t02,AgE06_g006_t01	MSTRG.23125.4,MSTRG.23125.4,MSTRG.23796.1,MSTRG.23400.4,MSTRG.7427.1,MSTRG.23443.1,MSTRG.17933.1,MSTRG.19994.2,MSTRG.19994.2,MSTRG.21580.2,MSTRG.18317.15,MSTRG.22069.3,MSTRG.21090.8,MSTRG.19573.8,MSTRG.22241.1,MSTRG.20759.5,MSTRG.23481.2,MSTRG.16581.1,MSTRG.21941.1,MSTRG.8296.2,MSTRG.20187.3,MSTRG.11670.1	179	0.2	0.7	3.4	1.7
PgE088	28329	29138	PgE088_g003_t01	-	328	2	40s ribosomal protein s19			1.8	1.3	2.3	0.2	0.8
PgE089	5964	6815	PgE089_g001_t02	+	852	1	hypothetical protein			1.8	0	0	0	0
PgE089	7950	29359	PgE089_g002_t08	-	3814	16	Myoferlin	AgE02_g034_t08	MSTRG.21099.1,MSTRG.21099.1,MSTRG.20439.1,MSTRG.21100.1,MSTRG.20438.1	28.3	1.4	1.5	0.4	0.2
PgE090	2495	7081	PgE090_g001_t01	+	1014	6	protein ariadne-1	AgE35_g006_t02	MSTRG.19200.2	6.7	5.1	4.7	0.2	0.1
PgE090	8372	12958	PgE090_g002_t01	-	1014	6	protein ariadne-1	AgE35_g006_t02	MSTRG.19200.2	7.2	4.5	5.1	0.4	0.3
PgE090	19739	21737	PgE090_g003_t01	-	761	3	hypothetical protein			1	3.3	2.1	0	0
PgE091	1710	4144	PgE091_g001_t01	+	1422	4	Transcription initiation factor TFIID subunit 7	AgE04_g021_t04	MSTRG.22531.1,MSTRG.22532.1	12.4	34.1	11.1	0.8	0
PgE091	5795	23010	PgE091_g002_t04	-	1418	14	hypothetical protein	AgE65_g002_t03	MSTRG.24071.1,MSTRG.22816.1,MSTRG.22815.4,MSTRG.22815.4	64.7	0	0.1	1.6	0.7
PgE092	902	1207	PgE092_g001_t01	.	306	1	2-oxoglutarate dehydrogenase			1.7	0.4	0	0	0
PgE092	3532	9364	PgE092_g002_t05	+	1024	7	hypothetical protein			4.2	49.6	12.4	0.1	0.1
PgE092	19902	29310	PgE092_g003_t01	+	3946	2	tau-tubulin kinase 1			7.7	0.4	0.7	0.1	0.1
PgE093	8046	28697	PgE093_g001_t03	-	2503	17	protein-like protein 4	AgE07_g016_t02,AgE07_g017_t01,AgE10_g003_t13	MSTRG.22964.4,MSTRG.21159.4,MSTRG.21159.4,MSTRG.21159.4,MSTRG.21747.2	5.7	14.1	5	0.3	0
PgE094	2949	14251	PgE094_g001_t03	-	4206	12	Serine/threonine-protein phosphatase PP1	AgE12_g002_t11,AgE01_g035_t04,AgE09_g002_t06,AgB29_g017_t04,AgE03_g028_t02,AgE07_g011_t02,AgE05_g011_t03	MSTRG.7423.3,MSTRG.7423.3,MSTRG.7423.3,MSTRG.18841.1,MSTRG.18840.1,MSTRG.18840.1,MSTRG.22337.1,MSTRG.22900.4,MSTRG.21515.4,MSTRG.21515.4,MSTRG.23250.2,MSTRG.21870.4,MSTRG.21870.4,MSTRG.23946.1,MSTRG.13356.2	54.8	0	1	1.3	0.6
PgE094	16397	28811	PgE094_g002_t03	-	9747	4	hypothetical protein			4.5	0.6	1.3	0	0
PgE095	3565	4126	PgE095_g001_t01	.	562	1	hypothetical protein			0.1	0	1.8	1.7	0
PgE095	7437	9212	PgE095_g002_t01	-	369	4	Prefoldin subunit 1			27.1	52.5	21.1	9.7	35.4
PgE095	17842	28581	PgE095_g003_t02	-	3671	6	Solute carrier family 22 member 6	AgE01_g058_t04	MSTRG.22844.2,MSTRG.22844.2,MSTRG.21597.2,MSTRG.23266.3	24	0	0.2	0.6	0.1
PgE096	88	18701	PgE096_g001_t04	-	1152	8	Cytoplasmic polyadenylation element-binding protein 3	AgE11_g010_t05,AgB28X_g021_t03,AgE14_g010_t04,AgB14_g002_t10,AgB34_g003_t01	MSTRG.18758.3,MSTRG.18758.3,MSTRG.23108.1,MSTRG.23046.2	10.7	130.1	34.4	1.1	0.5
PgE097	5591	14042	PgE097_g001_t04	+	1947	9	hypothetical protein	AgE58_g003_t06	MSTRG.20537.7,MSTRG.22392.9,MSTRG.20607.2	12.3	11	2.1	0	0.1
PgE097	14830	15256	PgE097_g002_t01	.	427	1	hypothetical protein			15.3	18.5	0	0	0.6
PgE097	16346	22500	PgE097_g003_t02	+	1611	9	pyruvate dehydrogenase e1 component subunit alpha type	AgE58_g002_t03	MSTRG.22986.5,MSTRG.22986.5,MSTRG.20609.1,MSTRG.22714.1	785.1	3.1	3.2	20.3	6
PgE097	25318	26792	PgE097_g004_t01	+	1104	3	hypothetical protein			3.5	0	0	0	0
PgE098	13519	18442	PgE098_g001_t18	-	1771	4	hypothetical protein	AgE03_g020_t01,AgE15_g011_t01	MSTRG.24378.2	80.8	7.1	7.6	1.3	0.5
PgE098	21353	24698	PgE098_g002_t02	+	888	5	histone rna hairpin-binding protein	AgE03_g019_t01,AgE15_g010_t01		219.4	0	0.1	5.8	2.9
PgE099	2335	14016	PgE099_g001_t07	+	1476	11	unconventional myosin-vi	AgE46_g003_t05	MSTRG.17952.4	245.2	5.6	5.3	5.1	1.5
PgE100	724	1529	PgE100_g001_t01	.	806	1	hypothetical protein			12.1	1.6	6.6	1.1	0.1
PgE100	3054	3870	PgE100_g002_t01	+	240	2	hypothetical protein			6.9	0	0	0	0
PgE100	3703	23220	PgE100_g003_t03	-	2898	17	metal transporter cnnm4	AgE53_g004_t05,AgE07_g020_t04	MSTRG.20410.7,MSTRG.20410.7,MSTRG.20410.7,MSTRG.20410.7,MSTRG.20410.7	20.9	0	0	0.2	0.2
PgE101	16180	20492	PgE101_g001_t01	.	4313	1	hypothetical protein			217.5	124.9	103.2	66.5	94.8
PgE101	24475	26565	PgE101_g002_t01	-	573	5	Chondroitin proteoglycan 2		MSTRG.17386.1,MSTRG.17386.1,MSTRG.21321.1,MSTRG.21321.1,MSTRG.17379.1,MSTRG.17379.1,MSTRG.22778.4,MSTRG.22778.4,MSTRG.22778.4,MSTRG.23216.1,MSTRG.23216.1,MSTRG.22356.1,MSTRG.22356.1,MSTRG.22779.1,MSTRG.23217.2,MSTRG.23217.2,MSTRG.17380.1,MSTRG.17380.1,MSTRG.17383.1,MSTRG.17383.1,MSTRG.22777.1,MSTRG.22777.1,MSTRG.21148.7,MSTRG.21148.7,MSTRG.21148.7,MSTRG.22353.6	5.1	311.5	27.4	6.3	3
PgE102	664	867	PgE102_g001_t01	+	204	1	hypothetical protein	AgE01_g037_t02		3	0	0	0	0
PgE102	5438	21794	PgE102_g002_t06	-	3298	12	btb poz domain containing protein	AgE01_g038_t06	MSTRG.18618.5,MSTRG.23607.1	36.7	0	0.6	0.4	0.4
PgE102	25296	27320	PgE102_g003_t01	+	750	2	hypothetical protein	AgE01_g057_t03		25.9	0	1	0	0.2
PgE103	1408	4479	PgE103_g001_t02	-	1078	3	hypothetical protein	AgE02_g012_t03	MSTRG.18243.1	8.3	54.1	27.8	0	0.1
PgE103	784	1217	PgE103_g002_t01	.	434	1	hypothetical protein			2.1	0.9	0	0	0
PgE103	7849	11067	PgE103_g003_t01	+	1020	4	u1 small nuclear ribonucleoprotein c	AgE02_g011_t08		33	1.7	0.1	0.5	0.4
PgE103	12116	18765	PgE103_g004_t02	+	3414	5	u1 small nuclear ribonucleoprotein c		MSTRG.16867.4	11.1	0	0.4	0.1	0
PgE103	19266	27219	PgE103_g005_t02	-	3464	6	hypothetical protein	AgE02_g010_t02,AgE05_g005_t04	MSTRG.20001.2	10.7	1.8	1.1	0	0.1
PgE104	2736	13767	PgE104_g001_t02	-	1854	6	hypothetical protein	AgE11_g004_t04,AgE01_g042_t01,AgE02_g039_t02,AgE29_g003_t02	MSTRG.24117.1,MSTRG.24117.1,MSTRG.2298.1,MSTRG.23767.1	17.4	0	0.2	0.3	0.1
PgE104	16455	22270	PgE104_g002_t01	-	1038	2	hypothetical protein			2.8	0.2	0.5	0	0
PgE104	20696	21447	PgE104_g003_t01	.	752	1	hypothetical protein			2.7	0	3.1	0	0
PgE105	9268	9726	PgE105_g001_t03	+	459	1	hypothetical protein			18.4	0.1	0	0	0.5
PgE105	12583	25900	PgE105_g002_t03	-	10106	6	complement component c6	AgE01_g048_t02	MSTRG.20806.1,MSTRG.17384.1,MSTRG.22389.7,MSTRG.23197.1,MSTRG.20805.1	2.2	1	0.5	0.1	0
PgE106	107	19774	PgE106_g001_t06	-	4149	14	Myoferlin		MSTRG.21099.1,MSTRG.24106.2	26.2	0.9	3.7	0.6	0
PgE106	19880	24775	PgE106_g002_t02	+	1144	6	hypothetical protein	AgE02_g039_t02,AgE11_g004_t04,AgE01_g042_t01,AgE29_g003_t02	MSTRG.2298.1,MSTRG.24117.1,MSTRG.24117.1	89.3	2.2	0.2	0	0.3
PgE107	5986	16441	PgE107_g001_t03	-	1808	8	Transient receptor potential-gamma protein	AgE13_g006_t06	MSTRG.21562.4,MSTRG.21425.12	75	0.3	2.2	3.3	0.4
PgE107	86	1602	PgE107_g002_t01	.	1517	1	Transient receptor potential-gamma protein			34.6	0	0.1	2.5	0.6
PgE107	19269	24360	PgE107_g003_t01	+	646	4	Zinc finger protein with KRAB and SCAN domains 5	AgE13_g007_t02	MSTRG.21880.1	16	33.2	42.3	0.1	0.1
PgE108	1439	8246	PgE108_g001_t01	-	898	4	Solute carrier family 22 member 6	AgE01_g058_t04	MSTRG.22844.2,MSTRG.21597.2	49	0.1	2	1.4	0.3
PgE108	10660	24082	PgE108_g002_t01	-	741	3	Solute carrier family 22 member 6	AgE01_g058_t04	MSTRG.22844.2,MSTRG.21688.3	43.4	0	0	0	0.1
PgE109	423	3050	PgE109_g001_t01	-	942	3	hypothetical protein			2	1.7	3.7	0	0
PgE109	3845	6585	PgE109_g002_t01	.	2741	1	ubiquitin-conjugating enzyme e2 2	AgB17_g102_t01,AgE06_g010_t01,AgE71_g002_t01,AgE01_g010_t01,AgE13_g010_t02,AgE02_g008_t05,AgE11_g008_t06	MSTRG.8297.2,MSTRG.17394.1,MSTRG.22259.5,MSTRG.13376.1,MSTRG.16583.3,MSTRG.16583.3,MSTRG.18545.1,MSTRG.18751.1,MSTRG.1696.1,MSTRG.21511.1,MSTRG.7436.1,MSTRG.21512.1,MSTRG.21589.1,MSTRG.22898.1	11.5	0.2	2.8	0.4	0.3
PgE109	4062	10133	PgE109_g003_t01	-	1781	2	ubiquitin-conjugating enzyme e2 2	AgB17_g102_t01,AgE06_g010_t01,AgE71_g002_t01,AgE01_g010_t01,AgE13_g010_t02,AgE02_g008_t05,AgE11_g008_t06	MSTRG.8297.2,MSTRG.17394.1,MSTRG.22259.5,MSTRG.13376.1,MSTRG.16583.3,MSTRG.16583.3,MSTRG.18545.1,MSTRG.18751.1,MSTRG.1696.1,MSTRG.21511.1,MSTRG.7436.1,MSTRG.21512.1,MSTRG.21589.1,MSTRG.22898.1	16.4	0.4	3.3	0.6	0.5
PgE109	17962	25612	PgE109_g004_t03	-	1018	6	Ubiquitin carboxyl-terminal hydrolase 37		MSTRG.21096.1,MSTRG.20768.1	6	7.9	0	0	0.2
PgE110	10067	19629	PgE110_g001_t01	+	1943	12	T-complex protein 1 subunit beta			19.4	40	12.4	3.4	0.5
PgE111	3	3856	PgE111_g001_t01	-	2977	3	Ubiquitin-conjugating enzyme E2 2	AgE06_g010_t01,AgB17_g102_t01,AgE71_g002_t01,AgE01_g010_t01,AgE13_g010_t02,AgE02_g008_t05,AgE11_g008_t06	MSTRG.17394.1,MSTRG.8297.2,MSTRG.22259.5,MSTRG.13376.1,MSTRG.16583.3,MSTRG.16583.3,MSTRG.18545.1,MSTRG.18751.1,MSTRG.1696.1,MSTRG.21511.1,MSTRG.7436.1,MSTRG.21512.1,MSTRG.21589.1,MSTRG.22898.1	20.3	12.7	17.6	0.5	0.3
PgE111	5298	21068	PgE111_g002_t03	-	4169	10	putative serine threonine-protein kinase	AgE03_g039_t02,AgE26_g003_t02,AgE05_g002_t01,AgB33_g007_t02,AgB26_g001_t02,AgE06_g006_t01,AgB21_g003_t02,AgE57_g001_t04,AgE01_g016_t01	MSTRG.17766.1,MSTRG.13368.2,MSTRG.23846.1,MSTRG.19589.1,MSTRG.17769.3,MSTRG.23052.1,MSTRG.20782.13,MSTRG.13365.1,MSTRG.22167.7,MSTRG.20353.1,MSTRG.22376.1,MSTRG.21745.1,MSTRG.16874.1,MSTRG.21747.2,MSTRG.22673.1	92	0.1	0.9	2.1	1.3
PgE112	2564	8998	PgE112_g001_t06	-	1713	7	uridine phosphorylase 1	AgE17_g001_t05	MSTRG.23147.1,MSTRG.23147.1	98.4	0	0	1.3	2
PgE113	30	2023	PgE113_g001_t01	+	1381	4	hypothetical protein			4.2	1.1	2.2	0.1	0
PgE113	210	23045	PgE113_g002_t06	-	4935	28	ATP-dependent helicase brm	AgE31_g006_t01,AgE09_g020_t06,AgE31_g005_t01,AgE31_g007_t01,AgE30_g004_t02,AgE31_g008_t01		53.6	39.3	20	0.6	0.6
PgE114	8	4230	PgE114_g001_t01	+	1626	4	Myosin-VI			114.9	3.4	7	0.1	1.1
PgE114	6830	13486	PgE114_g002_t01	+	1991	3	hypothetical protein	AgE46_g004_t01	MSTRG.21662.1,MSTRG.21661.2	8.9	0	0	0	0.2
PgE115	11759	18383	PgE115_g001_t05	-	2026	4	hypothetical protein	AgE04_g010_t02	MSTRG.20576.1	21.5	1.2	2.9	0.3	0.2
PgE115	9634	12190	PgE115_g002_t01	+	263	2	puff-specific protein bx42			7.8	0.2	4.5	2.1	0
PgE115	20817	23959	PgE115_g003_t01	+	1866	3	hypothetical protein		MSTRG.23422.1,MSTRG.23423.1	3.1	0	0.5	1.7	0.1
PgE115	21050	23959	PgE115_g004_t02	-	2493	3	Xanthine dehydrogenase/oxidase			3.9	0	0.3	0.6	0.1
PgE116	4200	9907	PgE116_g001_t04	+	1658	6	histone rna hairpin-binding protein	AgE15_g010_t01,AgE03_g019_t01		96.7	0	1	1.4	1.1
PgE116	16126	22881	PgE116_g002_t04	+	1370	7	hypothetical protein	AgE13_g012_t01	MSTRG.10145.1	41.5	16.1	13.4	0.5	1.2
PgE117	1146	4885	PgE117_g001_t01	-	415	4	Eukaryotic translation initiation factor 3 subunit C	AgE03_g024_t01		2.2	0.9	4.7	0	0
PgE117	5880	20867	PgE117_g002_t03	+	5069	10	zinc-binding dehydrogenase family protein	AgE03_g025_t01	MSTRG.10147.2,MSTRG.23023.4,MSTRG.23023.4,MSTRG.23023.4,MSTRG.20582.12,MSTRG.20582.12,MSTRG.20582.12,MSTRG.20618.2,MSTRG.23024.1,MSTRG.23022.1	75.1	2.2	4.5	1.7	0.6
PgE118	348	1222	PgE118_g001_t01	+	417	2	hypothetical protein			174.1	107.4	118.5	26	19.8
PgE118	5775	13568	PgE118_g002_t01	+	1473	7	hypothetical protein	AgE17_g008_t02,AgE17_g002_t01		79.1	21.7	15	2.2	1.1
PgE120	222	3598	PgE120_g001_t01	-	546	5	hypothetical protein			0.4	0.1	0	0	0
PgE120	3924	13486	PgE120_g002_t03	-	2380	6	Major sperm protein	AgB03_g008_t05,AgB17_g092_t02,AgE05_g030_t01,AgE02_g005_t06	MSTRG.17381.1,MSTRG.21634.2,MSTRG.21634.2	36.9	0.5	3.1	1	0.3
PgE120	15013	21384	PgE120_g003_t02	-	5314	3	hypothetical protein	AgB03_g009_t02		3.2	0.2	0.1	0.2	0
PgE121	3134	7572	PgE121_g001_t01	-	828	5	Serpin-like protein			0	0	0.6	0	0
PgE121	16003	22711	PgE121_g002_t01	-	1225	4	hypothetical protein			0.8	4.8	4	0	0
PgE122	1	289	PgE122_g001_t01	+	289	1	hypothetical protein			0.8	0.2	4.9	0	0
PgE122	5033	7578	PgE122_g002_t02	+	2267	3	hypothetical protein			11.3	0	0.5	0	0
PgE122	7725	21498	PgE122_g003_t01	+	2018	10	hypothetical protein			165.9	0	3.1	3.9	1.3
PgE123	34	2295	PgE123_g001_t01	.	2262	1	hypothetical protein			1.6	0	0	0	0
PgE123	19978	22183	PgE123_g002_t01	+	426	3	ras-related protein rab-10	AgE10_g007_t01,AgE11_g005_t01	MSTRG.21636.1,MSTRG.22016.3,MSTRG.23892.1,MSTRG.21616.1	6.3	21.2	5.3	0.5	0.1
PgE124	14447	22334	PgE124_g001_t15	-	1076	5	60s ribosomal protein l17		MSTRG.18839.5	30.2	13	3.8	0.8	0.1
PgE125	689	8983	PgE125_g001_t01	-	4012	6	Female germline-specific tumor suppressor gld-1	AgE20_g005_t01	MSTRG.23090.1,MSTRG.22679.6,MSTRG.23126.1,MSTRG.21090.8,MSTRG.23691.6,MSTRG.22545.1,MSTRG.22545.1,MSTRG.23808.6,MSTRG.23235.2,MSTRG.23043.1,MSTRG.19586.8,MSTRG.19586.8,MSTRG.19586.8,MSTRG.23567.4,MSTRG.23567.4,MSTRG.23567.4,MSTRG.23568.1,MSTRG.22547.1	20.8	0	1	0.9	0.3
PgE126	3163	7591	PgE126_g001_t05	+	901	3	hypothetical protein	AgE15_g011_t01,AgE03_g020_t01	MSTRG.22591.2,MSTRG.24378.2	91.1	9.2	5.3	2.8	0.6
PgE126	4114	6616	PgE126_g002_t01	-	295	2	hypothetical protein	AgE15_g011_t01	MSTRG.24378.2,MSTRG.22591.2	190.8	16.4	13.7	9	3.9
PgE126	10672	10953	PgE126_g003_t01	.	282	1	Glycogen synthase kinase-3 beta	AgE47_g003_t06,AgE17_g009_t02,AgE04_g034_t02,AgE16_g006_t02,AgE23_g001_t01	MSTRG.16870.5,MSTRG.21423.2,MSTRG.20937.1,MSTRG.21893.3,MSTRG.16581.1,MSTRG.20803.1,MSTRG.23672.1,MSTRG.21941.1	1.9	0	0	0	0
PgE126	17124	22619	PgE126_g004_t01	+	2253	4	hypothetical protein			19.7	0.1	0.1	0.1	0.1
PgE127	9	21005	PgE127_g001_t03	+	6723	10	hypothetical protein		MSTRG.24366.2,MSTRG.22833.10	37.5	0.2	0.2	0.7	0.2
PgE128	7360	21203	PgE128_g001_t04	+	2837	6	hypothetical protein			30.5	0.1	0.9	0	0.4
PgE128	17807	20794	PgE128_g002_t01	-	2988	1	hypothetical protein			68.4	34.6	54	19.5	20.7
PgE129	23	15332	PgE129_g001_t03	-	4675	4	hypothetical protein	AgE03_g034_t07	MSTRG.20875.1	19.6	0.2	0	0	0.2
PgE129	23	21770	PgE129_g002_t03	+	2451	9	Homeotic protein female sterile		MSTRG.17953.1,MSTRG.22101.15	35.2	1.1	0.5	0.2	0.1
PgE130	1265	21010	PgE130_g001_t02	-	3580	12	hypothetical protein	AgE02_g013_t06	MSTRG.19787.1	15.9	16	10.5	0.5	0.2
PgE131	5790	19567	PgE131_g001_t01	-	2660	14	Patched-related protein 9	AgE27_g005_t01,AgE27_g006_t01		3.7	177.3	92.6	4.5	0.7
PgE132	1123	8344	PgE132_g001_t05	-	914	5	hypothetical protein			67.9	0	0.1	1.2	0.1
PgE132	13088	21637	PgE132_g002_t04	+	2034	12	Sodium-dependent phosphate transporter 1	AgB32_g005_t04		15.4	1.7	2.6	0	0.7
PgE133	1728	14633	PgE133_g001_t03	-	2586	13	Succinyl-CoA:3-ketoacid-coenzyme A transferase	AgB34_g004_t01		50.9	324.8	28.4	1.8	1.5
PgE134	8769	9218	PgE134_g001_t01	.	450	1	Fem-3 mRNA-binding factor 2	AgE13_g013_t01	MSTRG.20500.1,MSTRG.20499.1	0.8	1.8	0	0	0.3
PgE134	10361	18612	PgE134_g002_t01	+	1113	4	Fem-3 mRNA-binding factor 2	AgE13_g013_t01,AgE23_g005_t02	MSTRG.20499.1,MSTRG.13373.1,MSTRG.21563.1,MSTRG.20500.1	3.2	20.8	12.7	0	0
PgE135	724	10451	PgE135_g001_t01	+	5510	6	RNA-binding protein Raly	AgB29_g018_t03,AgE06_g003_t03	MSTRG.21310.3,MSTRG.18748.3,MSTRG.22108.1	14.1	2	1	0.2	0.1
PgE135	14356	21474	PgE135_g002_t01	+	6632	2	Serine/threonine-protein kinase			8.8	0	0	0.1	0
PgE136	6	7118	PgE136_g001_t01	+	2039	7	2-oxoisovalerate dehydrogenase subunit beta	AgE16_g005_t01		154.8	10.4	8.3	4.4	2
PgE136	16948	21430	PgE136_g002_t04	-	3053	4	Major sperm protein	AgB17_g092_t02,AgB03_g008_t05	MSTRG.17381.1,MSTRG.21634.2,MSTRG.21634.2	55.3	0	0.8	0.9	1.1
PgE137	2	7178	PgE137_g001_t02	-	6795	3	Pre-rRNA-processing protein pro-1			25.1	0.4	3.3	0.6	0.2
PgE137	10323	11559	PgE137_g002_t01	+	493	2	beta-hexosaminidase a			0.2	0.5	8.7	0.1	0
PgE137	16987	19681	PgE137_g003_t02	+	323	4	hypothetical protein	AgE44_g001_t02	MSTRG.22607.2	28.3	1.1	3.9	0	0
PgE138	5645	16411	PgE138_g001_t10	+	3601	9	cleavage and polyadenylation specificity factor subunit 3			1.4	6.3	4	0.4	0.1
PgE138	17001	20730	PgE138_g002_t01	+	833	6	Degenerin-like protein asic-1			0	2	0	0	0.9
PgE139	4915	5244	PgE139_g001_t01	-	330	1	hypothetical protein			0	0	0	0	0
PgE139	12936	16097	PgE139_g002_t01	-	564	3	Retrotransposable element Tf2 155 kDa protein type 1	AgB07_g005_t01		0.7	0	0	0	0
PgE140	3523	10083	PgE140_g001_t04	-	936	5	hypothetical protein	AgE08_g007_t05	MSTRG.22574.6,MSTRG.22576.1	14.8	9.4	5.3	0.6	0.3
PgE140	17486	20949	PgE140_g002_t02	+	825	2	Eukaryotic translation initiation factor 3 subunit C	AgE03_g023_t02		0.7	1.3	1.9	0	0
PgE141	1	7877	PgE141_g001_t01	+	1221	5	hypothetical protein	AgE05_g015_t02	MSTRG.20004.1	41.7	0	3.5	0.4	0.4
PgE141	8578	9119	PgE141_g002_t01	.	542	1	Endoplasmic reticulum mannosyl-oligosaccharide 1,2-alpha-mannosidase			2.7	0	14.9	0	0
PgE141	12046	12421	PgE141_g003_t01	+	376	1	hypothetical protein			0.7	0	170	0	0
PgE141	12787	13417	PgE141_g004_t01	.	631	1	hypothetical protein			3.3	3.9	187.6	0.2	0.1
PgE142	331	17450	PgE142_g001_t03	-	1775	10	Sperm vesicle fusion protein fer-1	AgE05_g014_t03	MSTRG.24106.2,MSTRG.21099.1	22.3	0.5	0.9	0.5	0.4
PgE143	113	2628	PgE143_g001_t02	-	598	3	hypothetical protein	AgE05_g015_t02		23.4	0.1	0	0	0.4
PgE143	6444	9584	PgE143_g002_t03	+	632	5	Cyclin-dependent kinases regulatory subunit		MSTRG.21323.1,MSTRG.24376.1	11.4	18.6	18.6	0.3	0
PgE143	16421	19519	PgE143_g003_t01	+	294	3	hypothetical protein			0	0	0	0	0
PgE144	11434	18188	PgE144_g001_t01	-	1254	6	cytoplasmic polyadenylation element-binding protein 3	AgB21_g001_t02,AgB34_g003_t01	MSTRG.18757.1	2.5	51.3	9.4	0	0.1
PgE144	11434	12290	PgE144_g002_t01	.	857	1	hypothetical protein			2.7	44.2	10.1	0	0.3
PgE145	4923	19270	PgE145_g001_t02	+	1411	9	Serine/threonine-protein kinase smg-1			39.3	10.4	12.7	10.5	2.8
PgE146	4938	10382	PgE146_g001_t01	-	3739	2	MSP-domain protein 4			9	0	0	0.2	0.1
PgE146	17587	20580	PgE146_g002_t01	-	1458	4	homeobox protein ceh-18	AgE18_g002_t01	MSTRG.20442.1,MSTRG.18621.7,MSTRG.19195.1	50.3	0	0.1	0.9	0.4
PgE147	8247	19733	PgE147_g001_t10	-	980	8	hypothetical protein	AgE27_g002_t02	MSTRG.18317.15,MSTRG.18318.1,MSTRG.18842.1	41.5	0.2	1.2	0.3	0.2
PgE148	1593	12006	PgE148_g001_t01	+	942	5	hypothetical protein	AgE44_g002_t01	MSTRG.23377.1,MSTRG.23377.1	210.7	20.8	10.3	4.2	1.2
PgE148	16042	20519	PgE148_g002_t09	+	1790	3	hypothetical protein			16.3	0	3.2	0.3	0.3
PgE149	23	4860	PgE149_g001_t01	+	2490	3	Lipoma-preferred partner	AgE05_g001_t01		5.5	0.2	0.1	0	0
PgE149	5005	10342	PgE149_g002_t02	+	1200	5	Lipoma-preferred partner		MSTRG.23915.1,MSTRG.22958.1	113.4	0	3.8	0.5	2.3
PgE149	11811	16162	PgE149_g003_t02	-	2240	5	Serine/threonine-protein kinase	AgE05_g002_t01,AgB21_g003_t02,AgE06_g006_t01,AgE26_g003_t02,AgB26_g001_t02,AgE57_g001_t04,AgB33_g007_t02,AgE01_g016_t01,AgE03_g039_t02	MSTRG.23052.1,MSTRG.13368.2,MSTRG.13365.1,MSTRG.20782.13,MSTRG.22718.1,MSTRG.19589.1,MSTRG.20353.1,MSTRG.23846.1,MSTRG.17769.3,MSTRG.21667.1,MSTRG.22673.1,MSTRG.18753.1,MSTRG.20059.1,MSTRG.22167.7,MSTRG.21747.2,MSTRG.21745.1,MSTRG.17766.1,MSTRG.16874.1	11.5	3	5.6	0.3	0.1
PgE149	16425	19105	PgE149_g004_t01	+	501	4	hypothetical protein	AgE05_g003_t02	MSTRG.20183.3	5.7	31.7	24.5	0	0
PgE149	17418	17828	PgE149_g005_t01	.	411	1	hypothetical protein			3.5	0	5.7	0	0
PgE150	3351	10164	PgE150_g001_t04	+	2995	2	Homologous-pairing protein 2			4	7.2	4	0	0
PgE150	10217	13342	PgE150_g002_t02	-	2411	3	Homologous-pairing protein 2			1.8	6.1	2.2	0	0.1
PgE150	18980	20257	PgE150_g003_t01	.	1278	1	hypothetical protein			69.4	0.2	0.5	1.5	0.7
PgE151	736	12585	PgE151_g001_t01	+	1198	6	hypothetical protein		MSTRG.23192.2	40.8	0.4	5.2	1.7	0.4
PgE152	177	20229	PgE152_g001_t05	-	8324	14	Proteasome activator complex subunit 4	AgB23_g072_t01	MSTRG.21057.1,MSTRG.524.3,MSTRG.524.3,MSTRG.23353.5,MSTRG.21621.1,MSTRG.21623.1,MSTRG.21623.1	57.3	0	3	1	0.4
PgE153	10	10856	PgE153_g001_t01	-	6478	8	Cyclic AMP-responsive element-binding protein 3-like protein 1	AgE31_g002_t02	MSTRG.21945.1,MSTRG.21821.1,MSTRG.21821.1	13.6	12	12.4	0.5	0.3
PgE153	8032	15428	PgE153_g002_t01	+	3253	9	Tubulin beta-1 chain	AgE31_g003_t01,AgE01_g014_t01	MSTRG.22771.4,MSTRG.22951.3,MSTRG.22951.3,MSTRG.22951.3,MSTRG.22951.3,MSTRG.21951.9,MSTRG.20623.1,MSTRG.20623.1,MSTRG.20623.1,MSTRG.22952.1,MSTRG.22952.1,MSTRG.22953.1,MSTRG.22953.1,MSTRG.22954.1,MSTRG.20800.1,MSTRG.20800.1,MSTRG.21949.2,MSTRG.21949.2,MSTRG.21949.2,MSTRG.19994.2,MSTRG.19994.2,MSTRG.21945.1,MSTRG.4175.1	82.1	256.1	331.2	8.2	1.7
PgE153	15848	20082	PgE153_g003_t01	+	1786	5	hypothetical protein	AgE31_g003_t01,AgE31_g004_t01,AgE02_g009_t05	MSTRG.21820.1	57.4	4.2	3.9	2.1	0.3
PgE154	357	2067	PgE154_g001_t01	+	372	2	protein argonaute alg-1		MSTRG.23708.1	3.3	9.9	6.3	0	0
PgE154	2628	3487	PgE154_g002_t01	.	860	1	hypothetical protein			6.1	32.7	10.5	0	0
PgE154	7539	19665	PgE154_g003_t01	+	4994	4	megakaryocyte-associated tyrosine-protein kinase			4.5	0.2	0.9	0.1	0.1
PgE155	4016	19990	PgE155_g001_t02	+	4751	5	hypothetical protein			32.2	0	1.1	1	0.2
PgE156	11794	19250	PgE156_g001_t11	-	6097	3	Tau-tubulin kinase 2	AgB33_g007_t02,AgE05_g002_t01,AgB26_g001_t02,AgB21_g003_t02,AgE26_g003_t02,AgE06_g006_t01,AgE01_g016_t01,AgE57_g001_t04	MSTRG.20782.13,MSTRG.20782.13,MSTRG.23846.1,MSTRG.23052.1,MSTRG.13368.2,MSTRG.22167.7,MSTRG.17769.3,MSTRG.23426.4,MSTRG.22376.1,MSTRG.20353.1,MSTRG.20059.1,MSTRG.13365.1,MSTRG.21667.1,MSTRG.16874.1,MSTRG.22673.1,MSTRG.18753.1,MSTRG.19589.1,MSTRG.22403.2,MSTRG.22718.1,MSTRG.18388.5	6	0.1	1.2	0	0.1
PgE157	352	5884	PgE157_g001_t01	-	1278	8	zinc c2h2 type family protein	AgE22_g003_t01,AgE35_g005_t01,AgB21_g002_t01,AgE05_g022_t01,AgB28X_g019_t01,AgE14_g005_t01,AgB08X_g003_t01,AgB28X_g016_t01,AgE03_g007_t01,AgB32_g001_t01,AgE66_g003_t01,AgB32_g002_t01,AgE32_g001_t01,AgB09X_g154_t02,AgB16X_g004_t01,AgE03_g006_t01,AgB16X_g003_t01,AgB08X_g002_t01,AgE75_g001_t01,AgE73_g002_t01		0.1	1.8	2.6	0	0
PgE158	287	19600	PgE158_g001_t03	+	14151	5	hypothetical protein			10.6	0.2	0.2	0.1	0.1
PgE159	30	3236	PgE159_g001_t02	-	1575	3	Tau-tubulin kinase 2			5.2	0	1.6	0	0
PgE159	5727	17310	PgE159_g002_t02	-	2085	6	Protein AF-9	AgE22_g013_t05	MSTRG.23048.1,MSTRG.21630.5	5.3	12.1	1.2	0.1	0.1
PgE160	5028	19219	PgE160_g001_t09	+	8982	4	hypothetical protein			16.7	0	0.3	0.7	0
PgE161	2215	17505	PgE161_g001_t02	+	2579	18	Vascular endothelial growth factor receptor 3	AgE07_g012_t01	MSTRG.20759.5,MSTRG.20759.5,MSTRG.20759.5,MSTRG.22671.1,MSTRG.20758.1,MSTRG.22672.1	7.6	44.4	51.9	0.8	0.6
PgE162	14830	18690	PgE162_g001_t04	-	1560	6	Kinesin-like protein KIF14			5.7	23.4	0.3	0	0.4
PgE163	13849	18647	PgE163_g001_t03	-	2777	3	hypothetical protein			3.8	0	1.1	0.2	0.1
PgE164	7715	8339	PgE164_g001_t01	+	246	2	hypothetical protein			0	0	0	0	0
PgE164	11196	15558	PgE164_g002_t03	-	1139	7	Polyadenylate-binding protein 2	AgE08_g009_t12	MSTRG.22880.1,MSTRG.20533.4	15.6	12.1	7.7	0.9	0
PgE165	4841	11347	PgE165_g001_t01	-	4389	5	Serine/arginine-rich splicing factor 12			3.1	0.1	0	0	0
PgE165	12560	14776	PgE165_g002_t01	+	877	3	hypothetical protein			143	0	0.3	1.8	0.5
PgE166	3163	16711	PgE166_g001_t05	-	1372	11	Abhydrolase domain-containing protein	AgB28X_g023_t07,AgE08_g001_t01	MSTRG.20910.28,MSTRG.20910.28,MSTRG.20910.28,MSTRG.22556.1,MSTRG.22246.3,MSTRG.23195.2	38.4	7.1	2.2	0.9	0
PgE167	3	2431	PgE167_g001_t01	+	1302	3	glutaminase	AgB24_g005_t05	MSTRG.21923.1	214	6.6	5.3	4.7	1.6
PgE167	5571	16622	PgE167_g002_t01	+	1500	11	Protein spinster 1	AgE46_g002_t05,AgE07_g014_t02	MSTRG.20604.1,MSTRG.2306.1,MSTRG.20603.6	85	0	0.8	2.8	0.3
PgE169	5423	10855	PgE169_g001_t04	-	802	5	dna-directed rna polymerase ii subunit rpb9	AgE10_g001_t02	MSTRG.22208.1,MSTRG.19345.2,MSTRG.24256.2	107.1	34	19.4	6.4	1.5
PgE169	11170	11734	PgE169_g002_t01	-	481	2	hypothetical protein			22.1	6.1	11.9	0	0
PgE170	10467	16990	PgE170_g001_t05	-	3381	5	Transcription factor BTF3			19.4	54.5	92.1	5.1	1.8
PgE171	10	6671	PgE171_g001_t01	+	2584	6	hypothetical protein			23	0	0.4	0.1	0.4
PgE171	8993	12956	PgE171_g002_t01	-	1766	3	hypothetical protein			9.4	0	0	0.1	0
PgE172	281	2811	PgE172_g001_t01	+	627	3	hypothetical protein			2.6	14.6	18.2	0	0
PgE172	4384	16023	PgE172_g002_t03	-	1829	9	hypothetical protein	AgE05_g005_t04,AgE02_g010_t02	MSTRG.20001.2	140	0.1	0.3	2.6	1.5
PgE173	5250	16895	PgE173_g001_t03	-	2961	8	hypothetical protein			25.3	0	0	0.2	0.5
PgE174	84	11201	PgE174_g001_t02	+	4626	6	hypothetical protein			37.4	0.2	0.7	0.5	0.4
PgE175	647	8534	PgE175_g001_t01	+	1554	9	hypothetical protein		MSTRG.20187.3	21.1	70.2	32.8	0	0.7
PgE176	9149	16644	PgE176_g001_t01	-	1873	9	proteasome activator complex subunit 4	AgE12_g006_t04,AgE01_g009_t13	MSTRG.21621.1,MSTRG.21057.1,MSTRG.524.3,MSTRG.524.3	103	1.2	1.3	1.4	1.4
PgE177	16	5252	PgE177_g001_t05	-	1164	6	hypothetical protein	AgE01_g023_t07	MSTRG.22477.1,MSTRG.22476.1	25.5	0	1.4	0.6	0.3
PgE177	14330	16584	PgE177_g002_t01	-	701	3	cre-galt-1 protein			2.1	0	25.1	8	0.7
PgE178	164	12465	PgE178_g001_t01	+	1527	8	homeobox protein ceh-18	AgE25_g006_t04,AgE18_g002_t01,AgE71_g001_t02	MSTRG.18621.7,MSTRG.20442.1,MSTRG.19195.1,MSTRG.19195.1,MSTRG.19195.1	14.9	8.1	11.4	0.6	0
PgE179	655	9161	PgE179_g001_t02	+	4395	5	2-oxoglutarate dehydrogenase		MSTRG.20802.2	8.4	0	0	1	0.1
PgE179	9244	9839	PgE179_g002_t01	.	596	1	Eukaryotic translation initiation factor 2 subunit 3			6.4	0	0	0	0
PgE179	9947	16667	PgE179_g003_t03	-	6262	3	hypothetical protein			11	0	0.2	0.1	0.1
PgE180	4380	16544	PgE180_g001_t03	-	2161	8	transcription initiation factor iib	AgE18_g008_t05	MSTRG.21736.1,MSTRG.21736.1,MSTRG.22385.2,MSTRG.22385.2,MSTRG.22385.2,MSTRG.22385.2,MSTRG.24118.2	33.8	12.7	2.5	0.3	0.5
PgE181	8531	11414	PgE181_g001_t02	+	510	2	Histone H1.X			1.6	3.1	0	0	0
PgE181	7412	8830	PgE181_g002_t01	-	1102	2	Histone H1.X			1.4	1	4.4	0	0
PgE182	1	10732	PgE182_g001_t02	-	9626	3	hypothetical protein			4	0.4	0.6	0.2	0
PgE182	1665	10732	PgE182_g002_t01	+	8411	2	hypothetical protein			4.4	0.1	0.4	0.2	0
PgE182	11238	16216	PgE182_g003_t02	-	2899	5	Tristetraprolin	AgB15X_g003_t01,AgB20_g012_t05	MSTRG.23371.1,MSTRG.23483.1,MSTRG.17223.2,MSTRG.17401.1,MSTRG.21582.1	11.2	51.5	86.7	0	0.2
PgE183	113	1860	PgE183_g001_t01	-	189	3	40S ribosomal protein S19G	AgB29_g014_t01,AgB29_g010_t04		0	0	0	0.3	0
PgE183	5802	15330	PgE183_g002_t04	+	778	8	hypothetical protein	AgB29_g012_t06	MSTRG.7421.1,MSTRG.18395.2,MSTRG.23675.1,MSTRG.18545.1	208.1	0	0.3	4.3	2.3
PgE184	9775	13560	PgE184_g001_t12	-	1371	6	Protein ECT2		MSTRG.23187.3	31.9	2.8	0	0.2	0.2
PgE185	1871	13533	PgE185_g001_t04	+	3029	9	Palmitoyltransferase ZDHHC15	AgB24_g004_t05	MSTRG.18619.1,MSTRG.18619.1	24.9	0	0.2	0.5	0.2
PgE185	13065	15781	PgE185_g002_t01	+	411	2	hypothetical protein			14.6	0	0	0.1	0.1
PgE186	3165	14085	PgE186_g001_t04	-	1800	9	hypothetical protein	AgE23_g007_t03	MSTRG.20934.4,MSTRG.20934.4	4.5	23	19.2	0	0.1
PgE187	13057	15622	PgE187_g001_t01	-	722	3	retinol dehydrogenase 12			1.6	0	1.9	8.6	3.6
PgE188	52	15493	PgE188_g001_t03	+	2629	15	Lamin-1	AgE10_g010_t02,AgE06_g024_t02	MSTRG.21940.4,MSTRG.22743.10,MSTRG.22743.10,MSTRG.22470.1,MSTRG.22470.1,MSTRG.24346.2	18.9	18.8	12	0.1	0
PgE189	2153	5894	PgE189_g001_t02	-	769	2	Alpha-mannosidase 2C1			173.7	5.7	16	3.9	2.8
PgE190	41	1259	PgE190_g001_t01	+	508	2	Rho guanine nucleotide exchange factor 7			0.3	0.6	7.4	0	0
PgE190	1342	9519	PgE190_g002_t01	+	2145	6	Rho guanine nucleotide exchange factor 7			1.2	2.2	1.6	0.2	0.1
PgE190	11403	14962	PgE190_g003_t01	-	1927	3	Telomerase-binding protein EST1A	AgE01_g053_t05,AgE01_g053_t05,AgE01_g053_t05,AgE01_g053_t05,AgE01_g053_t05		21.2	0.2	1.5	0.4	0.3
PgE191	1478	10032	PgE191_g001_t03	-	1507	6	Zinc finger CCCH domain-containing protein 4	AgE28_g007_t04	MSTRG.21656.5	5.8	12.7	13.7	0.1	0.1
PgE192	8201	10855	PgE192_g001_t01	+	507	4	hypothetical protein			25.5	34.6	2170.4	108.4	78.2
PgE192	11359	13931	PgE192_g002_t01	+	1263	3	Retrovirus-related Pol polyprotein from type-1 retrotransposable element R2			0	0	0	0	0
PgE193	12	9077	PgE193_g001_t01	-	8633	2	G2/mitotic-specific cyclin-B3			11.7	6.5	16.5	0.3	0.2
PgE193	20	10793	PgE193_g002_t04	+	6260	7	G2/mitotic-specific cyclin-B3	AgE01_g005_t02,AgB29_g006_t04	MSTRG.23118.1,MSTRG.23119.1,MSTRG.23251.2,MSTRG.23251.2,MSTRG.23251.2	18	14.6	24.8	0.4	0.2
PgE193	10879	14667	PgE193_g003_t02	-	1802	4	an1-like zinc finger family protein	AgE01_g007_t01	MSTRG.23374.1,MSTRG.23952.1,MSTRG.23625.1,MSTRG.22387.5	107.5	7	9.1	2.9	0.9
PgE194	57	6105	PgE194_g001_t04	+	1826	5	hypothetical protein			11	6.9	6.9	0	0
PgE195	97	198	PgE195_g001_t01	+	102	1	DAZ protein 1	AgE15_g007_t03		0	1.2	9.9	0.5	0
PgE195	412	4587	PgE195_g002_t01	-	1039	5	DAZ protein 1	AgE15_g007_t03	MSTRG.3004.1,MSTRG.18745.11,MSTRG.21517.12,MSTRG.21517.12	2.3	5.2	31	0	0
PgE195	4815	6166	PgE195_g003_t01	+	1158	2	hypothetical protein			2.7	10.8	23.8	0	0
PgE197	539	7961	PgE197_g001_t01	+	5379	3	Shaggy-related protein kinase gamma			323.6	154.2	165.1	94.8	135.8
PgE198	9760	13162	PgE198_g001_t03	+	669	5	Structural maintenance of chromosomes protein 1A	AgE41_g002_t01	MSTRG.20526.1,MSTRG.21387.1	7.7	8.4	6.3	0	0
PgE199	457	7895	PgE199_g001_t01	+	1055	8	f-box domain containing protein	AgE08_g016_t05	MSTRG.23569.1,MSTRG.18395.2,MSTRG.18396.1	302.6	0	2.1	4.6	3.7
PgE200	31	7837	PgE200_g001_t01	-	6699	2	Retrovirus-related Pol polyprotein from type-1 retrotransposable element R2	AgE04_g034_t02	MSTRG.21893.3	10.3	0	0.1	0.1	0
PgE201	47	13837	PgE201_g001_t04	+	1744	12	MutS protein 5	AgE10_g003_t13	MSTRG.21747.2	22.1	8.4	2.2	0	0.4
PgE202	888	10694	PgE202_g001_t02	-	725	6	hypothetical protein	AgE18_g010_t01	MSTRG.13358.5	30.2	0	0.3	0	0.2
PgE203	6021	13042	PgE203_g001_t02	+	1636	10	cytoplasmic polyadenylation element-binding protein 1	AgE14_g010_t04,AgE11_g010_t05,AgB28X_g021_t03,AgB14_g002_t10	MSTRG.23108.1,MSTRG.23046.2,MSTRG.18758.3,MSTRG.18758.3	11.1	34.7	18.3	0	0.7
PgE204	136	11192	PgE204_g001_t01	-	1490	9	Serine/threonine-protein phosphatase PP1 isozyme 7	AgB29_g017_t04,AgE01_g035_t04,AgE03_g028_t02,AgE09_g002_t06,AgE12_g002_t11,AgE07_g011_t02	MSTRG.22337.1,MSTRG.22900.4,MSTRG.21515.4,MSTRG.23946.1,MSTRG.7423.3,MSTRG.13356.2,MSTRG.23250.2,MSTRG.21870.4	129.4	0	2	2.2	1.3
PgE204	3756	4717	PgE204_g002_t01	.	962	1	hypothetical protein			3.8	0	0	0	0.2
PgE205	783	4880	PgE205_g001_t01	+	3959	3	hypothetical protein			421.6	214.8	199.2	116.9	183.8
PgE205	5204	11183	PgE205_g002_t01	-	1282	4	O-acetyltransferase oatA			1290.7	654.6	580.8	383.8	591.2
PgE206	3151	3507	PgE206_g001_t01	+	357	1	hypothetical protein			6.6	0.3	2.4	1.4	1.4
PgE206	9070	13166	PgE206_g002_t02	-	1896	3	Methionine aminopeptidase 1			2.6	5.7	5.8	3.3	1.1
PgE207	4518	6748	PgE207_g001_t03	+	2231	1	Serine/threonine-protein phosphatase pph-6			8.6	0.9	4.7	0.5	0.1
PgE207	9062	13246	PgE207_g002_t02	+	711	4	hypothetical protein		MSTRG.23666.1,MSTRG.23631.1	50.7	0	0	0.7	0.2
PgE208	395	10059	PgE208_g001_t08	+	758	7	Structural maintenance of chromosomes protein 1A		MSTRG.20526.1,MSTRG.21387.1	6.9	4.6	2.4	0	0
PgE209	6675	12493	PgE209_g001_t01	-	825	3	hypothetical protein			23.1	0.9	0	0	0.7
PgE212	28	1560	PgE212_g001_t01	.	1533	1	zinc finger protein			2	0	0	0	0
PgE212	3895	9283	PgE212_g002_t02	+	681	6	zinc finger protein	AgB06_g002_t01	MSTRG.22507.1,MSTRG.22507.1	9.8	0	0.9	0	0.1
PgE212	11971	12841	PgE212_g003_t02	-	309	2	26S proteasome non-ATPase regulatory subunit 2		MSTRG.23634.1	28.8	0	4.6	0	1.5
PgE213	3	3019	PgE213_g001_t01	+	1340	6	hypothetical protein	AgE01_g037_t02		6	1.3	2.3	0.6	0
PgE213	7919	12795	PgE213_g002_t01	+	3730	3	kinesin-2	AgB02_g486_t01		1.6	67.6	7.6	0.3	0.3
PgE214	59	8523	PgE214_g001_t03	+	3285	8	26S proteasome non-ATPase regulatory subunit 12	AgB04_g460_t04	MSTRG.17731.33,MSTRG.17731.33,MSTRG.17734.1,MSTRG.17734.1	20.4	0.2	1.6	0	0.1
PgE215	1476	4341	PgE215_g001_t01	-	1393	3	Serine/threonine-protein phosphatase pph-6	AgE07_g011_t02,AgE01_g035_t04,AgE09_g002_t06,AgB29_g017_t04,AgE03_g028_t02,AgE05_g011_t03,AgE12_g002_t11	MSTRG.23250.2,MSTRG.21515.4,MSTRG.22337.1,MSTRG.22900.4,MSTRG.7423.3,MSTRG.23946.1,MSTRG.21870.4,MSTRG.21870.4,MSTRG.13356.2,MSTRG.18840.1	11	0	0	0.5	0.1
PgE215	9339	10192	PgE215_g002_t01	-	766	2	hypothetical protein			2.6	18.4	23.1	0	0.2
PgE215	10732	12493	PgE215_g003_t02	-	450	3	Vascular endothelial growth factor receptor 3	AgE07_g012_t01	MSTRG.20759.5,MSTRG.22671.1	4	24.5	39	2.9	0.2
PgE216	63	12592	PgE216_g001_t03	+	3634	9	Glutaminase	AgB24_g005_t05	MSTRG.21923.1,MSTRG.21923.1	135.5	1.2	3	2.7	1.6
PgE217	2363	7488	PgE217_g001_t01	+	1598	2	Serine/threonine-protein kinase		MSTRG.22403.2	66.3	0.1	0.6	0.6	1
PgE218	59	12518	PgE218_g001_t02	+	1931	10	60s ribosomal protein l17	AgE21_g001_t08	MSTRG.18839.5	42.4	24.6	10.9	0.2	0.1
PgE219	36	10892	PgE219_g001_t01	+	1602	10	Neuroglian	AgE06_g023_t02	MSTRG.22905.1,MSTRG.22905.1	6.1	13.8	15.3	0.7	0.1
PgE221	9980	10463	PgE221_g001_t01	+	484	1	hypothetical protein			4.3	1.6	0.2	1.8	0.1
PgE222	4	8530	PgE222_g001_t02	-	4342	6	Testis-specific serine/threonine-protein kinase 2	AgE23_g001_t01,AgE04_g018_t07,AgE47_g003_t06,AgE06_g013_t01,AgE17_g009_t02,AgE03_g026_t04,AgB29_g016_t02,AgB34_g005_t05,AgE04_g034_t02,AgE12_g003_t14,AgE16_g006_t02,AgE03_g022_t01	MSTRG.21941.1,MSTRG.22069.3,MSTRG.20409.5,MSTRG.16870.5,MSTRG.16581.1,MSTRG.12983.2,MSTRG.23400.4,MSTRG.21893.3,MSTRG.7427.1,MSTRG.22241.1,MSTRG.23796.1,MSTRG.23125.4,MSTRG.23672.1,MSTRG.17933.1,MSTRG.21423.2,MSTRG.23332.3,MSTRG.20803.1,MSTRG.22070.1,MSTRG.21580.2	26.9	0.1	0.2	0.2	0.2
PgE224	3	6081	PgE224_g001_t05	+	2805	5	hypothetical protein		MSTRG.23631.1,MSTRG.23667.1	49.8	0	0.1	0.6	1
PgE224	5943	6978	PgE224_g002_t01	-	213	2	hypothetical protein			0	0	0	0	0
PgE225	4363	12140	PgE225_g001_t09	+	4452	4	Protein-associating with the carboxyl-terminal domain of ezrin			367.7	180.7	199.3	113.9	165.3
PgE226	8762	11719	PgE226_g001_t05	+	1599	3	DAZ protein 1		MSTRG.18400.1,MSTRG.18399.1	71.2	0	1.2	1.2	0.7
PgE227	612	6838	PgE227_g001_t21	+	2139	7	hypothetical protein		MSTRG.23674.1	37.4	1	0.7	0.3	0.5
PgE228	294	10773	PgE228_g001_t01	+	1706	8	ATP-dependent RNA helicase DDX19A	AgB29_g002_t01,AgB31X_g005_t01	MSTRG.19776.5,MSTRG.19777.1,MSTRG.19777.1	6	38.3	9.2	0.5	0.2
PgE229	4531	7315	PgE229_g001_t01	-	348	3	structural maintenance of chromosomes protein 1a	AgE43_g001_t02	MSTRG.2302.2	2.3	0.6	0	0	0
PgE229	8197	11806	PgE229_g002_t04	+	775	6	Tyrosine-protein phosphatase non-receptor type 9	AgB20_g013_t01,AgE02_g002_t03,AgE28_g004_t01,AgE28_g001_t01,AgE09_g001_t01	MSTRG.20010.1,MSTRG.21654.2,MSTRG.1831.1,MSTRG.22327.1,MSTRG.18835.3,MSTRG.20793.1,MSTRG.23873.1,MSTRG.21920.4,MSTRG.21864.2,MSTRG.23026.4,MSTRG.22716.2,MSTRG.22716.2,MSTRG.22740.5,MSTRG.22740.5,MSTRG.23028.1,MSTRG.23028.1,MSTRG.23028.1,MSTRG.22741.1,MSTRG.22741.1	118.2	0	0.1	2.1	1
PgE230	10957	11316	PgE230_g001_t01	+	360	1	hypothetical protein			3.9	2.9	7.5	0.9	0.1
PgE231	2246	11580	PgE231_g001_t01	+	1723	5	hypothetical protein			53.6	1.7	5.1	1.5	0.9
PgE232	75	10349	PgE232_g001_t04	-	2101	12	Tau-tubulin kinase 2	AgE57_g001_t04,AgB21_g003_t02,AgB33_g007_t02,AgE22_g012_t05,AgE05_g002_t01,AgE06_g006_t01,AgE26_g003_t02,AgB26_g001_t02,AgE01_g016_t01,AgB14_g003_t05	MSTRG.18753.1,MSTRG.21655.5,MSTRG.21655.5,MSTRG.21655.5,MSTRG.18388.5,MSTRG.22718.1,MSTRG.21667.1,MSTRG.23846.1,MSTRG.22167.7,MSTRG.23052.1,MSTRG.13368.2,MSTRG.19589.1,MSTRG.20782.13,MSTRG.20782.13,MSTRG.20353.1,MSTRG.22673.1,MSTRG.13365.1,MSTRG.22376.1,MSTRG.17769.3,MSTRG.21747.2,MSTRG.16874.1,MSTRG.23426.4,MSTRG.21745.1,MSTRG.20059.1,MSTRG.22403.2,MSTRG.21615.1	160.2	0	0.5	2	1
PgE233	2763	10416	PgE233_g001_t01	+	944	6	ubiquitin carboxyl-terminal hydrolase 37			8.7	14	4.1	0	0
PgE234	1620	9499	PgE234_g001_t01	+	1858	7	Structural maintenance of chromosomes protein 1A		MSTRG.20526.1	6.2	9.9	3.5	0	0
PgE235	185	10978	PgE235_g001_t03	+	963	6	Structural maintenance of chromosomes protein 1A	AgE43_g001_t02,AgE03_g018_t01	MSTRG.2302.2,MSTRG.20526.1,MSTRG.21620.1,MSTRG.21621.1	4.6	12.3	6.2	0	0
PgE236	273	5768	PgE236_g001_t01	.	5496	1	hypothetical protein			245.3	111.5	99	64	101
PgE236	7167	11358	PgE236_g002_t01	-	1679	4	hypothetical protein	AgB23_g078_t01	MSTRG.18630.1,MSTRG.20597.1	26.6	0.6	0	1.5	0.4
PgE237	10	8229	PgE237_g001_t01	+	1802	8	general transcription factor iif subunit 1	AgE24_g003_t01	MSTRG.23268.21	2.9	1.4	1.1	0	0
PgE238	5	5424	PgE238_g001_t01	+	1761	4	f-box domain containing protein	AgE08_g016_t05	MSTRG.18395.2	79.8	0	0.1	1.6	0.8
PgE238	2600	2991	PgE238_g002_t01	.	392	1	hypothetical protein			12	0	0	0	0
PgE239	1392	11233	PgE239_g001_t08	+	2095	6	protein-like protein 5		MSTRG.21747.2	11.4	7.6	1.7	0	0
PgE240	15	5796	PgE240_g001_t01	-	3518	2	MSP-domain protein 4			9.8	0	0	0	0
PgE241	465	5667	PgE241_g001_t01	+	603	5	Uncharacterized protein C9orf72			0.9	0	0	0	0
PgE242	15	9552	PgE242_g001_t05	-	4837	5	hypothetical protein	AgE02_g010_t02,AgE05_g005_t04	MSTRG.20001.2	11	0.2	0.2	0.1	0
PgE243	5135	8443	PgE243_g001_t01	-	949	7	hypothetical protein		MSTRG.24067.1,MSTRG.22247.1,MSTRG.22247.1	153.8	0	1.2	7.4	2.7
PgE244	3422	4404	PgE244_g001_t01	+	241	2	Methylenetetrahydrofolate reductase			1.6	0	0	0	0
PgE245	61	5909	PgE245_g001_t01	+	822	6	Lysine-specific histone demethylase 1A			5.1	18.5	15.2	4.1	3.1
PgE245	8980	9693	PgE245_g002_t01	+	279	2	hypothetical protein			0	0	0	0	0.1
PgE246	349	1099	PgE246_g001_t01	+	167	2	hypothetical protein			0	4.5	0	0	0.2
PgE246	4739	10657	PgE246_g002_t01	+	569	4	ATP-dependent RNA helicase DDX19A	AgB29_g002_t01		2.5	16.8	6.9	0	0
PgE247	2263	9821	PgE247_g001_t03	+	3609	3	hypothetical protein		MSTRG.23082.1	18.4	0	0.7	0.3	0.1
PgE248	35	6129	PgE248_g001_t01	-	1664	6	Uncharacterized protein R07B1.9			1	13.9	0.6	0.5	0.5
PgE249	1399	5401	PgE249_g001_t01	-	3808	2	venom allergen 5			65.4	38.5	89.5	26.8	26.5
PgE249	5486	8413	PgE249_g002_t03	-	371	4	Venom allergen 3			6.1	1.8	0.2	11.5	7
PgE250	1136	2375	PgE250_g001_t01	+	588	3	hypothetical protein			0.9	10.9	11.1	0	0
PgE251	15	9935	PgE251_g001_t01	-	2089	9	227 kDa spindle- and centromere-associated protein			8.1	31.7	5.3	0.3	11.5
PgE252	2664	9909	PgE252_g001_t04	+	2461	5	hypothetical protein	AgB31X_g010_t05	MSTRG.22983.6,MSTRG.22983.6	30.5	0	0	0.9	0.4
PgE253	402	4153	PgE253_g001_t02	+	3752	1	hypothetical protein			5.2	0.1	0	0	0
PgE256	2175	9730	PgE256_g001_t03	+	4847	3	hypothetical protein			7.7	6.5	14.3	0.4	0.1
PgE257	6445	6823	PgE257_g001_t01	.	379	1	hypothetical protein			2.8	0.1	0	0	0
PgE257	6893	9112	PgE257_g002_t02	-	418	3	Transcription initiation factor TFIID subunit 11	AgE24_g006_t02	MSTRG.22118.3,MSTRG.24371.1	3	1.2	2.4	0	0
PgE258	1963	8720	PgE258_g001_t02	-	1546	5	hypothetical protein	AgE06_g017_t03		2	6.5	7.2	0.1	0
PgE259	37	6326	PgE259_g001_t01	-	698	5	hypothetical protein			52.3	0.5	0.1	1.5	0.8
PgE260	700	6605	PgE260_g001_t01	+	1455	6	hypothetical protein		MSTRG.23312.1,MSTRG.22625.4	4	19.6	7.8	0.7	0
PgE260	6667	7117	PgE260_g002_t01	.	451	1	hypothetical protein			2.3	11.1	0.9	0	0
PgE261	3478	8009	PgE261_g001_t01	-	1153	6	Tubulin alpha chain	AgE01_g014_t01,AgE31_g003_t01	MSTRG.21951.9,MSTRG.21949.2,MSTRG.21949.2,MSTRG.22771.4,MSTRG.19994.2,MSTRG.20046.1,MSTRG.22951.3,MSTRG.22951.3	0.5	3.2	2.4	0.2	0
PgE261	6707	7568	PgE261_g002_t01	-	238	2	Tubulin alpha chain	AgE01_g014_t01,AgE31_g003_t01	MSTRG.21951.9,MSTRG.19994.2,MSTRG.22771.4,MSTRG.21945.1,MSTRG.22951.3,MSTRG.22952.1	3.1	7	8.8	0.5	0.6
PgE261	8226	9582	PgE261_g003_t01	-	558	3	Tubulin alpha chain	AgE01_g014_t01	MSTRG.21951.9	1.8	3.8	6.6	0	0.1
PgE262	13	734	PgE262_g001_t01	.	722	1	zinc c2h2 type family protein			0.5	2.4	11.6	0	0
PgE262	3153	9525	PgE262_g002_t04	+	2263	6	argonaute alg-6	AgE09_g019_t06	MSTRG.23710.1	9.7	21	4.1	0.5	0
PgE263	26	9453	PgE263_g001_t01	+	5913	2	Tau-tubulin kinase 2		MSTRG.18388.5	6.8	0.3	0.9	0.3	0.2
PgE263	4198	9453	PgE263_g002_t01	-	2519	3	Tau-tubulin kinase 2		MSTRG.18388.5	5.9	0.4	3.3	0.2	0
PgE264	14	9090	PgE264_g001_t01	-	3237	8	hypothetical protein	AgE08_g017_t05	MSTRG.22962.1,MSTRG.22207.1,MSTRG.23077.1,MSTRG.23159.1	12	1.4	1.1	0.4	0.1
PgE266	1109	3906	PgE266_g001_t02	+	178	2	hypothetical protein		MSTRG.17293.2	2.2	2.8	13.2	3	0.4
PgE268	2980	9327	PgE268_g001_t01	-	6348	1	hypothetical protein			35.1	18.4	41.9	12.8	13.7
PgE269	67	9314	PgE269_g001_t02	-	1447	7	MutS protein 5	AgE10_g003_t13,AgE07_g016_t02	MSTRG.21747.2,MSTRG.22964.4	14.1	10.9	3.1	0	0.2
PgE270	827	3214	PgE270_g001_t02	+	878	3	hypothetical protein			23.5	0.3	0.4	0.7	0
PgE270	4562	8288	PgE270_g002_t01	-	1837	4	hypothetical protein	AgE13_g012_t01	MSTRG.10145.1	5.2	10.4	11.8	0.4	0.1
PgE271	38	9242	PgE271_g001_t04	-	2638	7	Ubiquitin carboxyl-terminal hydrolase 37		MSTRG.21096.1,MSTRG.20768.1	4.7	5.4	2.7	0.5	0
PgE272	648	3539	PgE272_g001_t01	-	846	5	zinc c2h2 type family protein	AgE75_g001_t01,AgB32_g001_t01,AgE40_g002_t03,AgB28X_g019_t01,AgE35_g005_t01,AgB16X_g004_t01,AgE05_g022_t01,AgB21_g002_t01,AgE47_g001_t02,AgE14_g005_t01,AgE03_g006_t01,AgE22_g003_t01,AgE32_g001_t01,AgB08X_g003_t01		0.4	0.5	1.4	0	0
PgE273	8359	8964	PgE273_g001_t01	+	606	1	hypothetical protein	AgB20_g002_t01	MSTRG.23278.1,MSTRG.22818.1,MSTRG.16716.1	0.1	0	0	0	0
PgE274	552	6548	PgE274_g001_t02	-	3437	8	Tubulin alpha chain	AgE01_g014_t01,AgE31_g003_t01	MSTRG.21951.9,MSTRG.22771.4,MSTRG.22951.3,MSTRG.22951.3,MSTRG.19994.2,MSTRG.19994.2,MSTRG.19994.2,MSTRG.21949.2,MSTRG.21949.2,MSTRG.21949.2,MSTRG.21945.1,MSTRG.20046.1,MSTRG.22952.1,MSTRG.22953.1,MSTRG.22953.1	12	3.3	9.2	2.4	1.2
PgE275	148	248	PgE275_g001_t01	-	101	1	hypothetical protein			0	0	0	0	0
PgE275	857	5229	PgE275_g002_t01	+	1202	8	F-box only protein 28			1.6	26	5	0.6	0.2
PgE276	297	2572	PgE276_g001_t01	-	510	3	Transmembrane protein 39A			9.1	21.3	27	5.6	7.4
PgE276	2684	5356	PgE276_g002_t01	-	2563	2	hypothetical protein			44.7	22.4	14	10.1	12.1
PgE276	6766	7993	PgE276_g003_t02	+	701	2	hypothetical protein			19.7	0.6	3	1.2	0.2
PgE277	5	8927	PgE277_g001_t02	-	1692	8	putative tyrosine-protein kinase kin-31	AgB34_g005_t05,AgB29_g016_t02,AgE04_g018_t07,AgE03_g026_t04,AgE12_g003_t14,AgE02_g027_t05,AgE03_g022_t01,AgE23_g001_t01,AgE07_g012_t01,AgE06_g013_t01,AgE04_g029_t08,AgB33_g008_t01	MSTRG.23125.4,MSTRG.23796.1,MSTRG.23400.4,MSTRG.7427.1,MSTRG.23443.1,MSTRG.17933.1,MSTRG.19994.2,MSTRG.19994.2,MSTRG.21580.2,MSTRG.18317.15,MSTRG.22069.3,MSTRG.21090.8,MSTRG.19573.8,MSTRG.19573.8,MSTRG.22241.1,MSTRG.16581.1,MSTRG.21941.1,MSTRG.8296.2,MSTRG.20759.5,MSTRG.23481.2,MSTRG.11670.1,MSTRG.20409.5	112.9	8.7	3.7	1.5	1.3
PgE278	9	3590	PgE278_g001_t01	+	966	5	coiled-coil and c2 domain-containing protein 2a			2.2	13.2	1.3	0.6	0
PgE279	1597	8592	PgE279_g001_t02	+	2142	5	hypothetical protein			12.2	0.1	0	0	0.1
PgE280	307	2259	PgE280_g001_t01	-	747	2	hypothetical protein			9.4	94.4	61.7	0.8	0.1
PgE280	4449	6498	PgE280_g002_t04	-	690	4	hypothetical protein	AgE04_g017_t01	MSTRG.22259.5,MSTRG.17390.5	7.2	27.6	23.2	0.1	0.1
PgE281	7444	8750	PgE281_g001_t01	-	415	2	UDP-glucuronosyltransferase ugt-48			0.5	0.3	0	0.9	6.4
PgE282	390	8360	PgE282_g001_t02	+	1688	10	hypothetical protein		MSTRG.20056.4,MSTRG.20057.1	176.3	0.3	0.9	2.6	1.7
PgE283	5758	7874	PgE283_g001_t01	-	1190	3	eukaryotic translation initiation factor 2 subunit 2	AgE47_g005_t02		13.3	0.5	1.3	0	0.2
PgE284	12	8378	PgE284_g001_t03	+	7172	3	hypothetical protein			16	0.3	6.5	0.3	0
PgE285	691	8333	PgE285_g001_t01	+	1200	7	filamin-a		MSTRG.11418.12,MSTRG.11416.1,MSTRG.23521.1	39.7	41.5	11.9	0.8	0.4
PgE286	5811	7096	PgE286_g001_t02	-	321	3	ASABF-alpha			0	0.5	0.3	1	234.9
PgE288	49	4823	PgE288_g001_t01	+	2801	3	hypothetical protein	AgE15_g005_t19		1.3	0.6	2.3	0	0
PgE289	1385	7390	PgE289_g001_t01	+	1338	4	Alpha-(1,3)-fucosyltransferase C	AgB04_g463_t01		8.3	0	0.4	0.6	0
PgE290	3	6302	PgE290_g001_t01	-	5117	2	hypothetical protein	AgE04_g010_t02	MSTRG.20576.1	13.8	6.7	5.1	0.5	0.1
PgE290	4203	8173	PgE290_g002_t05	+	1489	3	hypothetical protein	AgE04_g009_t05	MSTRG.23422.1	19	0.2	1	0	0.7
PgE292	45	8142	PgE292_g001_t01	+	2519	4	hypothetical protein		MSTRG.22528.1,MSTRG.23241.1	25.3	0.4	2.3	0.9	0.1
PgE293	64	7884	PgE293_g001_t01	+	2185	9	Tyrosine-protein phosphatase non-receptor type 6	AgE28_g004_t01,AgE28_g001_t01,AgB20_g013_t01,AgE02_g002_t03	MSTRG.21654.2,MSTRG.18835.3,MSTRG.20010.1,MSTRG.22327.1,MSTRG.1831.1,MSTRG.23873.1,MSTRG.21920.4,MSTRG.20793.1,MSTRG.23026.4,MSTRG.21864.2,MSTRG.22716.2,MSTRG.22716.2,MSTRG.22740.5,MSTRG.22740.5,MSTRG.23028.1,MSTRG.23028.1,MSTRG.22741.1,MSTRG.22741.1	83.3	1.9	3.1	1.3	0.9
PgE294	3	4471	PgE294_g001_t01	+	599	5	myosin-7	AgE02_g032_t01	MSTRG.21021.3,MSTRG.21867.1	12.4	44.3	12.3	0	0
PgE294	6054	7943	PgE294_g002_t01	+	205	2	myosin-7	AgE02_g029_t02	MSTRG.21021.3	16	29.8	9	0	0
PgE295	1337	7013	PgE295_g001_t02	-	5132	4	Retrotransposable element Tf2 155 kDa protein type 1	AgE12_g005_t01,AgE23_g010_t01,AgB07_g005_t01,AgE08_g019_t01	MSTRG.21881.2,MSTRG.21881.2,MSTRG.22256.2,MSTRG.22256.2,MSTRG.22256.2,MSTRG.22257.1,MSTRG.22257.1,MSTRG.22257.1,MSTRG.18626.6,MSTRG.18626.6,MSTRG.23159.1,MSTRG.21606.1	26.2	226.4	237.2	3.2	1.1
PgE296	1122	1838	PgE296_g001_t01	-	717	1	Retrotransposable element Tf2 155 kDa protein type 1			0.8	1.6	0	0	0
PgE296	1924	2460	PgE296_g002_t01	-	537	1	gag-pol polyprotein	AgB11_g003_t03,AgE05_g028_t01,AgE48_g005_t01,AgB11_g002_t01	MSTRG.24235.1,MSTRG.24236.1,MSTRG.21360.1,MSTRG.18626.6,MSTRG.22392.9,MSTRG.22574.6,MSTRG.22574.6	0.5	3	0	0	0
PgE301	479	7659	PgE301_g001_t01	-	3510	3	hypothetical protein			2.3	1	1.9	0	0.1
PgE302	1011	6827	PgE302_g001_t01	-	669	4	excitatory amino acid transporter	AgE04_g019_t01	MSTRG.17757.1,MSTRG.19190.1,MSTRG.23780.3	108.9	0	0.1	1.2	1.2
PgE304	677	7546	PgE304_g001_t03	-	1837	4	hypothetical protein	AgE44_g001_t02	MSTRG.22607.2	13.6	0.1	4.2	0	0.1
PgE306	5299	6755	PgE306_g001_t04	-	600	2	Structural maintenance of chromosomes protein 2			0.9	13.8	3.5	0	0
PgE307	140	7332	PgE307_g001_t01	-	1662	11	von Willebrand factor A domain-containing protein 8			10.5	26.6	18.9	6.4	10.1
PgE308	143	5404	PgE308_g001_t01	-	1014	4	cell division control protein 42-like protein	AgE02_g022_t01	MSTRG.20044.1,MSTRG.21298.12,MSTRG.8300.1,MSTRG.21823.2,MSTRG.23154.1	12.3	31.9	20.5	0	0.1
PgE308	5503	6532	PgE308_g002_t01	+	547	2	hypothetical protein	AgE02_g032_t01		5.7	8	3.1	0	0
PgE311	4131	5941	PgE311_g001_t02	-	421	3	Cyclin-dependent kinases regulatory subunit		MSTRG.21323.1,MSTRG.24376.1	0.5	3.5	14	0	0
PgE312	3165	6954	PgE312_g001_t05	+	2281	3	Beta-galactosidase			10	0.1	0	0	0
PgE313	132	6623	PgE313_g001_t01	-	1109	7	Uncharacterized protein R09E10.5			0.7	6.6	6.4	0.1	0.1
PgE314	18	7144	PgE314_g001_t02	-	1875	5	Zinc finger CCCH domain-containing protein 4	AgE28_g005_t01	MSTRG.13375.1,MSTRG.18545.1	36	0	1.5	0.6	0.3
PgE319	485	7061	PgE319_g001_t01	+	978	3	hypothetical protein	AgE07_g007_t01	MSTRG.21362.1	41.9	0	0.1	1.7	0.6
PgE320	4891	6690	PgE320_g001_t01	+	354	3	hypothetical protein			0	0	2.8	0	0
PgE321	2	6934	PgE321_g001_t02	+	1359	6	60s ribosomal protein l17	AgE21_g001_t08	MSTRG.18839.5	64.7	26.5	9.8	2	0.2
PgE322	485	2206	PgE322_g001_t01	+	668	3	AP-1 complex subunit beta-1			6.1	10.2	11.8	3.6	4.7
PgE323	62	1928	PgE323_g001_t03	-	908	3	hypothetical protein			4	10.4	8.5	0	0
PgE323	4252	6976	PgE323_g002_t02	-	506	4	Chromatin-remodeling complex ATPase chain isw-1			4.2	66.1	20.9	1.1	0.2
PgE326	860	3440	PgE326_g001_t04	-	1197	3	hypothetical protein			24.6	0.2	0	0	0
PgE327	80	1783	PgE327_g001_t02	-	812	3	hypothetical protein			40	0	0.1	0.3	0.2
PgE327	5647	5982	PgE327_g002_t01	-	336	1	hypothetical protein			37.3	1.3	0.5	0	0.1
PgE328	1	6591	PgE328_g001_t02	-	4528	5	hypothetical protein			1.1	8.5	3	0.1	0
PgE329	819	6855	PgE329_g001_t03	+	5843	2	DnaJ dnj-5			6.4	0.1	0.6	0	0
PgE330	715	5580	PgE330_g001_t01	-	1446	3	bromodomain associated family protein		MSTRG.20537.7,MSTRG.23413.3	5.1	3.9	0	0.2	0.2
PgE331	746	6547	PgE331_g001_t01	+	932	7	Cyclin-B1-2	AgB29_g006_t04,AgE01_g005_t02	MSTRG.23118.1	12.1	31.7	34.5	0.3	0.2
PgE334	4279	4518	PgE334_g001_t01	-	240	1	hypothetical protein			0	0	0	0	0
PgE336	1354	6674	PgE336_g001_t01	+	474	3	hypothetical protein			0.4	0	0	0	0
PgE339	68	1227	PgE339_g001_t01	-	307	2	hypothetical protein			0	0	0	0	0
PgE340	3818	4858	PgE340_g001_t01	.	1041	1	hypothetical protein		MSTRG.23967.1,MSTRG.23967.1	5.6	0.7	0	0	0.2
PgE341	52	5165	PgE341_g001_t01	-	821	4	Cell division control protein 42	AgE05_g005_t04,AgE05_g006_t01,AgE02_g010_t02	MSTRG.20001.2	198	3.4	5.2	2.7	1.3
PgE342	817	3948	PgE342_g001_t01	-	2879	3	Casein kinase II subunit alpha			7.7	0.4	0.8	0.2	0.1
PgE342	817	4337	PgE342_g002_t01	+	3443	2	Casein kinase II subunit alpha			6.4	0.4	0.4	0.1	0.1
PgE343	3	6346	PgE343_g001_t01	+	4563	4	hypothetical protein	AgE01_g022_t01		6.7	6.4	11.9	0.1	0.1
PgE343	5177	6346	PgE343_g002_t01	-	1022	2	hypothetical protein	AgE01_g023_t07	MSTRG.22477.1	6.9	0.3	0.7	0.2	0.1
PgE345	205	4010	PgE345_g001_t01	-	840	4	hypothetical protein	AgE06_g017_t03		5.8	15.7	10.7	0.1	0
PgE346	1590	4189	PgE346_g001_t01	-	1633	3	hypothetical protein			0.8	8.2	2.3	0	0
PgE347	13	5105	PgE347_g001_t06	-	847	6	hypothetical protein	AgE04_g023_t01	MSTRG.20527.5,MSTRG.23674.1,MSTRG.23542.13,MSTRG.23542.13,MSTRG.23543.6	38.3	5.7	2.3	0	0.3
PgE348	24	5393	PgE348_g001_t01	-	777	4	Mitogen-activated protein kinase 10	AgE47_g003_t06,AgE04_g034_t02,AgE17_g009_t02,AgE16_g006_t02	MSTRG.20625.12,MSTRG.20803.1,MSTRG.21423.2,MSTRG.16581.1,MSTRG.23672.1,MSTRG.21893.3,MSTRG.16870.5	0.9	6.8	4.3	3.2	3.7
PgE349	1204	5533	PgE349_g001_t01	+	542	4	protein ubash3a-like protein	AgE09_g016_t01	MSTRG.23945.2	33.7	0	0	0	0.9
PgE351	241	5862	PgE351_g001_t02	-	1029	6	Transmembrane protein 39A			12	42.8	22.1	5.9	10.1
PgE352	355	4037	PgE352_g001_t02	+	1246	5	Serine palmitoyltransferase 2		MSTRG.22468.1	4.8	2.7	2.1	0.7	0.1
PgE353	1245	6124	PgE353_g001_t07	+	678	3	hypothetical protein			24.8	0	0	0	0.2
PgE355	54	6081	PgE355_g001_t02	+	1003	5	abhydrolase domain-containing protein	AgB28X_g023_t07,AgE02_g033_t08	MSTRG.22556.1,MSTRG.22246.3,MSTRG.23195.2,MSTRG.20910.28,MSTRG.22248.3,MSTRG.23196.1	83	0.3	6.1	0	1.7
PgE356	5445	5935	PgE356_g001_t01	+	210	2	zinc-binding dehydrogenase family protein	AgE03_g025_t01	MSTRG.10147.2,MSTRG.20582.12,MSTRG.23023.4,MSTRG.23023.4,MSTRG.23024.1,MSTRG.22849.9	0	0	0	0	0
PgE357	628	5315	PgE357_g001_t02	+	622	6	hypothetical protein	AgE01_g030_t03	MSTRG.23357.1	8.8	12	7.3	0	0.6
PgE358	126	5940	PgE358_g001_t01	+	1354	4	Glycerol kinase 5	AgB01_g829_t06		2.3	9.6	2.3	0	0.1
PgE361	49	5851	PgE361_g001_t03	-	875	6	ATP-binding cassette sub-family B member 8			4.4	8.8	5.8	3.5	1
PgE362	83	5762	PgE362_g001_t01	+	1619	7	Nose resistant to fluoxetine protein 6	AgE13_g005_t05	MSTRG.19922.1,MSTRG.22184.1,MSTRG.22185.1	0.5	79	26.8	0.5	0
PgE363	1	2384	PgE363_g001_t01	-	1703	3	hypothetical protein	AgE22_g001_t03	MSTRG.23967.1	1.9	2.1	4.3	0	0
PgE363	3170	5059	PgE363_g002_t01	-	939	3	hypothetical protein	AgB31X_g003_t01,AgB20_g003_t01,AgB20_g003_t01,AgE22_g001_t03,AgE05_g021_t01	MSTRG.16484.4,MSTRG.16484.4,MSTRG.21902.2	0.2	0	1.8	0	0
PgE363	4096	4521	PgE363_g003_t01	.	426	1	hypothetical protein			0.4	1.8	1.2	0	0
PgE364	402	5500	PgE364_g001_t02	-	1100	8	Neuroglian	AgE06_g023_t02	MSTRG.22905.1	14.9	21.2	10.7	0.4	0
PgE366	5	2448	PgE366_g001_t01	+	2105	3	atp-dependent rna helicase dhx8			17	8.1	4.8	7.9	1.3
PgE366	4320	5818	PgE366_g002_t04	+	480	3	atp-dependent rna helicase dhx8			17.3	9.9	0	0.9	0.6
PgE367	1243	1960	PgE367_g001_t02	-	389	2	DAZ protein 1	AgE15_g007_t03	MSTRG.3004.1,MSTRG.21517.12,MSTRG.18745.11	2.3	8.3	24.8	0	0.1
PgE369	3549	5417	PgE369_g001_t01	+	378	2	hypothetical protein		MSTRG.21682.1	2.9	0	9.5	0	0
PgE370	3	5596	PgE370_g001_t01	+	1483	7	Translational activator GCN1			22.9	27.8	32.6	14.5	7.4
PgE371	1	5593	PgE371_g001_t02	-	3553	4	Pyruvate dehydrogenase protein X component			55.1	1.5	4.6	1.7	0.5
PgE371	1	5593	PgE371_g002_t01	+	5087	2	Pyruvate dehydrogenase protein X component			27	0.8	1.4	0.5	0.2
PgE373	74	2683	PgE373_g001_t01	+	2430	2	hypothetical protein			5.7	0.4	0.4	0	0.2
PgE374	63	4196	PgE374_g001_t01	+	1308	5	RNA-binding motif protein, X-linked 2			1.4	1.5	3	0.6	0.7
PgE375	79	2224	PgE375_g001_t01	+	399	2	neuropeptide receptor a8			0	0	0	0	0
PgE376	4132	5387	PgE376_g001_t01	-	627	2	Casein kinase II subunit beta	AgB28X_g012_t01		3.5	1.3	0	0.1	0
PgE378	1011	4913	PgE378_g001_t01	+	640	5	eukaryotic translation initiation factor 3 subunit i	AgE04_g032_t03,AgE01_g040_t03	MSTRG.22438.3,MSTRG.18407.4	7.3	15.8	10.9	0	0
PgE379	325	3268	PgE379_g001_t01	-	1437	3	hypothetical protein			1.6	0.1	2.1	0	0
PgE379	4664	5289	PgE379_g002_t01	.	626	1	Retrotransposable element Tf2 155 kDa protein type 1			18.2	8.1	47.4	0	0
PgE381	883	5162	PgE381_g001_t01	-	3182	3	Tyrosine-protein kinase Fer	AgE04_g018_t07		2.9	0	0	0	0
PgE382	1255	2033	PgE382_g001_t01	+	459	2	hypothetical protein			0	0	0	0	0
PgE384	1	4414	PgE384_g001_t01	+	948	5	tudor domain containing protein	AgE01_g033_t01,AgE01_g033_t01,AgB22X_g003_t04	MSTRG.7997.22	6.2	9.4	7.1	0	0.3
PgE386	885	4885	PgE386_g001_t01	-	1456	3	hypothetical protein	AgE25_g007_t01		6.2	12.9	8.3	0.6	0
PgE387	22	4125	PgE387_g001_t03	-	354	4	hypothetical protein	AgE28_g006_t03	MSTRG.22320.3	26	0	0	0.2	0
PgE388	5	4560	PgE388_g001_t01	+	2918	4	reticulon-4			8.7	28.1	14	25.3	38.6
PgE390	2690	3884	PgE390_g001_t01	+	804	2	hypothetical protein		MSTRG.23278.1,MSTRG.17764.1,MSTRG.22206.1,MSTRG.16716.1,MSTRG.16716.1	0.4	0.2	0.2	0	0
PgE392	2	4771	PgE392_g001_t02	-	1920	5	myosin-7			19.2	12.3	17	1.4	0.3
PgE393	3	2282	PgE393_g001_t01	-	1419	2	hypothetical protein			51	5.8	106.8	1.8	0.3
PgE395	109	1561	PgE395_g001_t01	-	481	3	Tyrosine-protein kinase kin-31	AgB34_g005_t05,AgB29_g016_t02	MSTRG.23125.4	55.8	0	0	0.3	0
PgE396	40	1889	PgE396_g001_t01	+	853	3	Sodium- and chloride-dependent neutral and basic amino acid transporter B(0+)		MSTRG.23053.3	28.2	0	0	0.4	0
PgE396	2647	4700	PgE396_g002_t01	+	1161	2	hypothetical protein	AgE04_g006_t11	MSTRG.22183.1,MSTRG.20523.1	38.1	0	0.8	0.5	0.3
PgE397	686	4659	PgE397_g001_t01	+	994	4	Tau-tubulin kinase 2	AgE22_g012_t05,AgE57_g001_t04,AgB21_g003_t02,AgE05_g002_t01,AgE26_g003_t02,AgE06_g006_t01,AgB33_g007_t02,AgE03_g039_t02	MSTRG.18388.5,MSTRG.18753.1,MSTRG.21655.5,MSTRG.13368.2,MSTRG.22718.1,MSTRG.17769.3,MSTRG.19589.1,MSTRG.21667.1,MSTRG.23052.1,MSTRG.23846.1,MSTRG.20353.1,MSTRG.17766.1,MSTRG.22376.1,MSTRG.13370.1,MSTRG.13365.1	10.5	0.6	1.4	0	0.2
PgE399	42	4636	PgE399_g001_t03	+	1802	4	an1-like zinc finger family protein		MSTRG.23951.1,MSTRG.23374.1	96	4.3	4	1.8	1.2
PgE403	411	3792	PgE403_g001_t01	+	873	5	mog interacting and ectopic p-granules protein 1		MSTRG.18836.1	14.4	59.7	28.3	0.1	0.1
PgE404	1462	4458	PgE404_g001_t01	-	1756	3	Major sperm protein isoform beta	AgE02_g015_t02,AgE02_g037_t01,AgE02_g017_t01,AgE02_g016_t01,AgE02_g005_t06	MSTRG.10800.2,MSTRG.7434.2,MSTRG.22310.1,MSTRG.22311.1,MSTRG.22311.1,MSTRG.23685.5,MSTRG.23685.5,MSTRG.19788.1,MSTRG.19788.1,MSTRG.22367.1,MSTRG.23686.3,MSTRG.23686.3,MSTRG.23311.1,MSTRG.20011.3,MSTRG.20011.3,MSTRG.19787.1,MSTRG.22368.1,MSTRG.23368.2,MSTRG.23491.3,MSTRG.24298.2,MSTRG.24361.2	6855.5	1.2	24.4	180.2	74
PgE404	2702	4278	PgE404_g002_t01	+	1274	2	Major sperm protein isoform beta		MSTRG.10800.2,MSTRG.23685.5,MSTRG.23685.5,MSTRG.23686.3,MSTRG.22310.1,MSTRG.7434.2,MSTRG.22311.1,MSTRG.22311.1,MSTRG.23311.1,MSTRG.19788.1,MSTRG.19788.1,MSTRG.22367.1,MSTRG.19787.1,MSTRG.22368.1,MSTRG.20011.3,MSTRG.20011.3,MSTRG.23368.2	4424.5	0.7	17.4	128.6	47.1
PgE406	28	4225	PgE406_g001_t01	+	1969	3	hypothetical protein		MSTRG.22528.1	25.8	0.2	2.3	0.6	0.1
PgE407	53	4155	PgE407_g001_t02	-	534	5	DAZ protein 1	AgE15_g007_t03,AgB29_g019_t07,AgE04_g024_t03,AgE04_g024_t03,AgE04_g024_t03	MSTRG.3004.1,MSTRG.18745.11,MSTRG.23504.1,MSTRG.21517.12,MSTRG.21517.12,MSTRG.21686.2,MSTRG.21686.2,MSTRG.20533.4,MSTRG.7993.2,MSTRG.18838.3,MSTRG.18838.3,MSTRG.2266.1	3.6	11.5	44.6	0.1	0
PgE408	33	4371	PgE408_g001_t01	+	1915	4	u2 small nuclear ribonucleoprotein b			50.7	3.6	2.6	0.8	0.2
PgE409	150	3572	PgE409_g001_t01	+	744	3	ras-related protein rab-10	AgE10_g007_t01	MSTRG.21636.1,MSTRG.22016.3,MSTRG.23234.1	1.9	8.2	3.7	0	0.2
PgE409	2595	3230	PgE409_g002_t01	-	636	1	hypothetical protein			1	0.6	2	0	0
PgE410	8	4237	PgE410_g001_t04	-	1363	3	hypothetical protein			39	1.5	1.3	3	0.1
PgE412	20	3947	PgE412_g001_t01	+	1202	6	regulator of microtubule dynamics protein 2	AgE01_g017_t03,AgE25_g002_t05	MSTRG.18616.4,MSTRG.23278.1,MSTRG.23194.1,MSTRG.21516.2	294.9	4.1	3.6	8.2	3
PgE415	170	492	PgE415_g001_t01	.	323	1	LINE-1 retrotransposable element ORF2 protein			0	0	0	0	0
PgE415	1443	1818	PgE415_g002_t01	.	376	1	LINE-1 retrotransposable element ORF2 protein			0	0	0	0.1	0
PgE415	1990	2356	PgE415_g003_t01	.	367	1	LINE-1 retrotransposable element ORF2 protein			0	0	0	1.2	0
PgE415	2427	3084	PgE415_g004_t01	-	537	2	LINE-1 reverse transcriptase homolog			0	0	0	0	0
PgE416	832	1893	PgE416_g001_t01	-	1062	1	Cuticle collagen 34			0.6	0.1	0.2	0	0.1
PgE417	351	4154	PgE417_g001_t03	+	842	4	eukaryotic translation initiation factor 3 subunit i	AgE04_g032_t03	MSTRG.22438.3	4.5	7.7	1.3	0	0
PgE418	1216	2365	PgE418_g001_t01	.	1150	1	hypothetical protein			3.3	0.2	0	0	0
PgE419	2360	3391	PgE419_g001_t01	+	262	2	Insulin-like growth factor 2 mRNA-binding protein 1			1.8	6.2	2.9	0	0
PgE420	63	2700	PgE420_g001_t01	-	472	3	Kelch-like protein 8			6.2	20.3	6.2	9.3	3.7
PgE423	1179	3143	PgE423_g001_t02	+	738	3	Zinc finger protein with KRAB and SCAN domains 5			3.7	11.9	18.5	0	0
PgE424	2865	3857	PgE424_g001_t01	-	414	2	hypothetical protein		MSTRG.21886.4,MSTRG.21888.1	122.1	0	0.2	3.6	1.5
PgE425	624	2373	PgE425_g001_t01	-	605	2	ALG-1		MSTRG.23708.1,MSTRG.23709.1	5.9	16.1	14.7	0.1	0
PgE425	1584	3725	PgE425_g002_t01	+	1327	2	argonaute alg-6		MSTRG.23709.1,MSTRG.23708.1	4.2	8.9	3.8	0.2	0
PgE425	3135	3725	PgE425_g003_t01	-	269	2	argonaute alg-6		MSTRG.23710.1,MSTRG.23709.1,MSTRG.23709.1	6.9	16.3	11.2	0	0
PgE427	1	3493	PgE427_g001_t01	+	3008	2	cytoplasmic dynein 2 heavy chain 1			11.1	1.5	3.2	1.7	0.4
PgE432	32	3309	PgE432_g001_t01	+	632	4	Myoferlin	AgE02_g034_t08	MSTRG.21099.1,MSTRG.20439.1	24.7	0	7.3	0.3	0.1
PgE436	644	1691	PgE436_g001_t01	.	1048	1	hypothetical protein			28	4.1	1.5	0	0.2
PgE438	86	3509	PgE438_g001_t01	+	1072	3	udp-sugar transporter sqv-7			1	5.3	3.2	1.1	1.1
PgE441	195	3534	PgE441_g001_t01	+	1997	3	Tyrosine-protein phosphatase non-receptor type 3			20.9	0.1	0.7	0.5	0.4
PgE443	830	1693	PgE443_g001_t01	.	864	1	hypothetical protein	AgB20_g002_t01	MSTRG.23278.1,MSTRG.23278.1,MSTRG.22818.1,MSTRG.16716.1	4.8	0.3	3.4	0	0
PgE443	2235	3388	PgE443_g002_t01	+	600	2	hypothetical protein		MSTRG.17764.1,MSTRG.22206.1	0.4	0.2	2.5	2.2	0
PgE451	1951	2947	PgE451_g001_t02	-	447	2	hypothetical protein			1	17.4	6.6	0.4	0
PgE455	263	2112	PgE455_g001_t01	-	273	3	Phospholipase D1			0.7	0.6	1.5	0	0.5
PgE457	1324	2650	PgE457_g001_t01	-	558	3	Protein SMG9	AgB28X_g010_t01		4.7	60.8	24.1	0	0.1
PgE458	216	2427	PgE458_g001_t01	+	700	2	ras-related protein rab-10	AgE10_g007_t01	MSTRG.21636.1,MSTRG.22016.3,MSTRG.23234.1,MSTRG.21616.1,MSTRG.23892.1	4.3	25.1	33.2	0	0.1
PgE459	326	2653	PgE459_g001_t02	-	480	3	Tubulin alpha-2 chain	AgE01_g014_t01,AgE31_g003_t01,AgE31_g003_t01	MSTRG.21951.9,MSTRG.21951.9,MSTRG.19994.2,MSTRG.19994.2,MSTRG.21949.2,MSTRG.22771.4,MSTRG.22771.4,MSTRG.22951.3,MSTRG.22951.3,MSTRG.20046.1,MSTRG.22953.1	96.8	324.1	177.8	9.2	3.1
PgE460	269	2722	PgE460_g001_t01	+	580	6	Dimethyladenosine transferase			4.4	20.2	8.7	1.5	2.2
PgE461	5	1738	PgE461_g001_t01	+	738	2	Protein phosphatase 1 regulatory subunit 7			40.5	0	0.1	1.8	1.5
PgE465	1036	1792	PgE465_g001_t02	-	207	2	excitatory amino acid transporter	AgE04_g019_t01	MSTRG.19190.1,MSTRG.17757.1,MSTRG.21657.6	131.5	0	0	0	1.2
PgE468	737	2963	PgE468_g001_t01	-	693	4	hypothetical protein			0	0	0	0	0
PgE469	1	3045	PgE469_g001_t01	-	2375	2	U2 small nuclear ribonucleoprotein B	AgE01_g021_t03		25.9	0.7	1.5	0.2	0.2
PgE469	1	1125	PgE469_g002_t01	+	905	2	U2 small nuclear ribonucleoprotein B			29.3	0.8	3.2	1.9	0.3
PgE470	773	2950	PgE470_g001_t01	+	284	3	myosin-7	AgE02_g032_t01	MSTRG.21021.3	11.3	40.8	19.8	0	0
PgE471	134	3027	PgE471_g001_t03	+	380	5	argonaute alg-6		MSTRG.23710.1	18.3	35.7	13.9	0	0
PgE473	11	2980	PgE473_g001_t01	+	1281	4	hypothetical protein			65.9	0	0.9	1.1	0.5
PgE474	861	2848	PgE474_g001_t01	+	554	2	Cuticle collagen 99			176.9	0.1	0.8	6.4	6.7
PgE475	71	2065	PgE475_g001_t01	-	383	3	CCR4-NOT transcription complex subunit 2	AgB28X_g022_t01,AgB13X_g103_t08	MSTRG.20589.2	9.1	35.9	18.4	0.1	0
PgE478	4	2730	PgE478_g001_t01	-	722	3	Nose resistant to fluoxetine protein 6		MSTRG.19922.1	1.7	96.9	35.4	0	0.2
PgE483	137	1731	PgE483_g001_t01	-	823	2	phosphatidylinositol 4-kinase type 2-beta			6.6	31.8	11.4	6	1.8
PgE485	237	2066	PgE485_g001_t01	+	1207	2	hypothetical protein			5.4	21.8	10.8	0	0
PgE487	15	2412	PgE487_g001_t01	.	2398	1	hypothetical protein			22	0	0.3	0.5	0.2
PgE488	27	2877	PgE488_g001_t03	-	2635	2	hypothetical protein			22.2	0	0	0.9	0.2
PgE489	123	2844	PgE489_g001_t02	-	387	2	ephrin type-a receptor 3		MSTRG.18317.15	20.9	3.1	5.9	1.3	0.3
PgE491	6	2846	PgE491_g001_t01	+	2841	1	hypothetical protein			0	0	0	0	0
PgE493	1433	2560	PgE493_g001_t01	-	366	3	Protein KIAA0100			5.1	19.9	5.7	5.2	2.9
PgE495	25	2803	PgE495_g001_t01	+	1346	3	hypothetical protein			3.6	0	7.2	61.9	13.2
PgE498	446	2778	PgE498_g001_t01	+	1103	3	Serine/threonine-protein kinase	AgE05_g002_t01,AgE06_g006_t01,AgB21_g003_t02	MSTRG.23052.1,MSTRG.13365.1,MSTRG.13368.2,MSTRG.13370.1,MSTRG.20353.1,MSTRG.19589.1,MSTRG.22673.1,MSTRG.23846.1,MSTRG.17769.3	10.4	3.3	2.4	0	0.1
PgE502	7	2738	PgE502_g001_t02	-	1076	3	u2 small nuclear ribonucleoprotein b	AgE01_g021_t03		21.5	1.1	1.4	0.1	0.1
PgE502	7	2677	PgE502_g002_t01	+	2454	2	u2 small nuclear ribonucleoprotein b			59	1.5	2	1.2	0.5
PgE504	407	2727	PgE504_g001_t01	-	378	4	FAD-dependent oxidoreductase domain-containing protein 1			9.5	19.2	11.3	12.3	8.1
PgE505	458	2707	PgE505_g001_t02	+	817	3	hypothetical protein	AgE08_g004_t01,AgB28X_g025_t02	MSTRG.21301.4	122	0.1	0.1	3	1.9
PgE507	7	2697	PgE507_g001_t02	-	2121	4	Phosphoribosyl pyrophosphate synthase-associated protein 2			54.7	0.3	0.5	0	0.2
PgE508	41	2608	PgE508_g001_t01	-	1410	2	hypothetical protein		MSTRG.22983.6	29.1	0	0.1	2.5	0.1
PgE509	1	2645	PgE509_g001_t02	-	2645	1	Cuticle collagen 12			241	0	0.3	2.8	8.9
PgE509	1	2645	PgE509_g002_t02	+	365	2	Proline-rich protein 2			116.3	0	0	0.4	4.7
PgE510	271	2327	PgE510_g001_t01	-	274	3	signal recognition particle receptor subunit beta			1.6	16.9	14.4	0.6	3.2
PgE519	59	1946	PgE519_g001_t02	-	344	3	hypothetical protein	AgE59_g001_t09		40.3	0	0	1.9	0.3
PgE519	59	1883	PgE519_g002_t01	.	1825	1	hypothetical protein	AgE59_g001_t09		25.7	0.1	0	0.1	0.2
PgE521	870	1674	PgE521_g001_t01	+	215	2	Isocitrate dehydrogenase NADP cytoplasmic			0.9	29.9	4.7	0	0.3
PgE526	17	2308	PgE526_g001_t01	+	972	2	protein spinster-like protein 1		MSTRG.2306.1,MSTRG.20604.1	26.4	0	0	0.2	0
PgE529	125	2182	PgE529_g001_t01	+	615	4	227 kDa spindle- and centromere-associated protein			2.2	24.4	10.9	3	3.1
PgE530	29	2016	PgE530_g001_t02	-	998	3	an1-like zinc finger family protein			29.2	3.1	1.7	1.2	0.3
PgE533	48	1044	PgE533_g001_t01	.	997	1	pyruvate dehydrogenase protein x	AgE01_g020_t01		37.6	0.9	2.9	1.8	0
PgE535	67	2184	PgE535_g001_t01	+	849	3	argonaute alg-6		MSTRG.23710.1	6.2	13.9	5.2	0.3	0
PgE539	3	2308	PgE539_g001_t01	-	886	2	hypothetical protein			0	0	0	0	0
PgE539	1050	2308	PgE539_g002_t03	+	1259	1	hypothetical protein			0	0	0	0	0
PgE540	1290	1700	PgE540_g001_t01	+	411	1	hypothetical protein			0.9	0	0	0	0
PgE543	1	2254	PgE543_g001_t01	+	1836	2	ATP-dependent RNA helicase cgh-1	AgB31X_g005_t01,AgB29_g002_t01	MSTRG.19776.5,MSTRG.19777.1,MSTRG.19777.1	7.7	4.1	2.7	0.1	0.1
PgE547	267	2080	PgE547_g001_t01	+	521	3	Ubiquitin carboxyl-terminal hydrolase 46			7	24.1	10.5	3.2	1.5
PgE548	30	671	PgE548_g001_t01	.	642	1	hypothetical protein			6.8	0	0	0	0.1
PgE549	1	2118	PgE549_g001_t01	+	2118	1	hypothetical protein			33.2	0.3	0	1.2	0.7
PgE550	1050	1538	PgE550_g001_t01	+	489	1	hypothetical protein			0	0	0	0	0
PgE559	2	1179	PgE559_g001_t01	+	308	2	cell division control protein 42-like protein			4.6	9	3	0	0
PgE562	1111	2011	PgE562_g001_t01	-	660	2	S1 RNA-binding domain-containing protein 1			1.1	6.5	0.8	0	0.5
PgE564	224	478	PgE564_g001_t01	-	255	1	hypothetical protein			0	0	0	0	0
PgE566	575	1144	PgE566_g001_t01	.	570	1	hypothetical protein		MSTRG.17764.1,MSTRG.23247.4,MSTRG.23247.4	3.3	1.4	3.4	1.1	0
PgE568	59	359	PgE568_g001_t01	+	301	1	hypothetical protein		MSTRG.23967.1,MSTRG.24101.5,MSTRG.21160.1,MSTRG.22377.1	2.1	0	0	0	0
PgE568	770	1855	PgE568_g002_t01	+	405	4	hypothetical protein			0.3	0.9	0.2	0	0.4
PgE569	5	2036	PgE569_g001_t01	.	2032	1	hypothetical protein		MSTRG.17764.1,MSTRG.22206.1	9.6	5.7	9.7	1.4	0.4
PgE571	193	1752	PgE571_g001_t01	+	1013	4	Exosome complex exonuclease RRP43			3.2	1.7	0.8	0.5	0.2
PgE572	61	1134	PgE572_g001_t01	-	479	3	nucleolar pre-ribosomal-associated protein 1			14.3	10.9	0.7	1.8	2.3
PgE573	622	1652	PgE573_g001_t01	+	365	2	peptide methionine sulfoxide reductase			0.3	10	0	2.4	1.9
PgE575	6	1868	PgE575_g001_t01	-	1771	2	Methylmalonyl-CoA mutase			19.4	0.3	0.6	1	0.2
PgE575	207	1868	PgE575_g002_t02	+	742	3	Methylmalonyl-CoA mutase	AgB02_g471_t05	MSTRG.21740.5	56.1	1.6	1.2	1.7	0.8
PgE593	131	1629	PgE593_g001_t01	-	561	3	Poly ADP-ribose polymerase 3			0.2	0.3	0.1	3.3	0.5
PgE595	15	1725	PgE595_g001_t02	+	1092	3	E3 ubiquitin-protein ligase MARCH8			102.7	0.5	1.5	0.1	1.4
PgE597	833	961	PgE597_g001_t01	-	129	1	Glycyl-tRNA synthetase			10.1	7.3	0	8.4	5.6
PgE601	12	518	PgE601_g001_t01	-	184	2	hypothetical protein			0.3	0	0	0	0
PgE604	125	1520	PgE604_g001_t01	-	407	3	Multidrug resistance-associated protein 7			3	11.9	6.2	3	2.4
PgE609	1080	1728	PgE609_g001_t01	+	237	2	hypothetical protein			0	0	0	0	0
PgE616	666	1710	PgE616_g001_t01	-	362	2	ccr4-not transcription complex subunit 2	AgB13X_g103_t08,AgB28X_g022_t01	MSTRG.20589.2	24.3	21.9	6.3	0	0
PgE625	56	1681	PgE625_g001_t01	.	1626	1	hypothetical protein		MSTRG.8000.1	25.4	0	0.3	0	0.2
PgE636	430	1573	PgE636_g001_t02	+	1144	1	ADP,ATP carrier protein 1	AgE01_g019_t01,AgE03_g027_t02	MSTRG.22206.1,MSTRG.22328.1	75.9	1	1.8	2.3	0.4
PgE640	419	1556	PgE640_g001_t01	.	1138	1	hypothetical protein			35.3	0	0	0	0.1
PgE641	103	1454	PgE641_g001_t01	-	400	3	tudor domain containing protein	AgB22X_g003_t04,AgE01_g033_t01		2.3	8.7	13.8	2.6	0.8
PgE642	664	1425	PgE642_g001_t01	-	484	2	hypothetical protein			7.1	26.7	11.1	0.1	0
PgE644	121	1270	PgE644_g001_t01	-	188	2	Structural maintenance of chromosomes protein 2			2.5	3.5	0	0	0.2
PgE645	494	1507	PgE645_g001_t01	+	385	2	Nuclear receptor coactivator 2			0.9	5.3	11.6	7.7	9.3
PgE649	36	869	PgE649_g001_t01	+	477	2	hypothetical protein			2	0.5	3.7	1.6	0.2
PgE651	16	1377	PgE651_g001_t01	+	94	2	transcription elongation factor s-ii			5.4	22.4	0	0	1.5
PgE652	85	241	PgE652_g001_t01	-	157	1	CCR4-NOT transcription complex subunit 2	AgB13X_g103_t08,AgB28X_g022_t01	MSTRG.20589.2	15.4	22.4	2.7	0	0
PgE653	263	1506	PgE653_g001_t01	-	1161	2	hypothetical protein			31.7	0	0	0.9	0.8
PgE659	201	975	PgE659_g001_t01	-	312	2	Beta-1,4-N-acetylgalactosaminyltransferase bre-4			0.5	3.2	4.8	1.9	1.9
PgE660	1	1439	PgE660_g001_t01	.	1439	1	hypothetical protein	AgB31X_g003_t01,AgB20_g003_t01,AgE22_g001_t03,AgE05_g021_t01	MSTRG.16484.4	3.5	0.3	0	0.3	0
PgE661	1	1113	PgE661_g001_t01	+	657	2	Myosin-4		MSTRG.23671.1	0	0	0	0	0
PgE673	753	1405	PgE673_g001_t01	-	653	1	RING finger protein			1.2	10.2	1.5	0.2	0
PgE674	35	1164	PgE674_g001_t01	+	515	2	atp-dependent rna helicase dhx8			23.7	12.5	0.2	3.8	1.3
PgE676	113	598	PgE676_g001_t01	+	486	1	hypothetical protein		MSTRG.17764.1	0.4	0.5	3.8	0	0
PgE690	23	77	PgE690_g001_t01	-	55	1	hypothetical protein			0	0	0	0	0
PgE698	10	1296	PgE698_g001_t01	.	1287	1	hypothetical protein			2.7	1.2	11.3	2.4	0.1
PgE705	1	1276	PgE705_g001_t01	.	1276	1	hypothetical protein			61.4	0	0	1.6	0.2
PgE717	508	924	PgE717_g001_t01	+	417	1	hypothetical protein			0	0	0	0	0
PgE718	1	1232	PgE718_g001_t01	-	579	2	pyruvate dehydrogenase protein x	AgE01_g020_t01		94.9	0	1.3	2.4	0.6
PgE732	2	827	PgE732_g001_t01	+	374	2	hypothetical protein			0.7	5.9	0	0	0
PgE738	109	796	PgE738_g001_t01	-	324	2	pyruvate dehydrogenase protein x	AgE01_g020_t01		5.6	0.6	2.8	0	0
PgE747	577	1031	PgE747_g001_t01	.	455	1	hypothetical protein			21.6	1.5	9	1.7	0
PgE754	27	1053	PgE754_g001_t01	.	1027	1	cre-grl-4 protein			0	0	0	0	22.7
PgE762	614	714	PgE762_g001_t01	-	101	1	hypothetical protein			0	0	0	0	0
PgE765	85	170	PgE765_g001_t01	-	86	1	hypothetical protein			0	0	0	0	0
PgE779	93	238	PgE779_g001_t01	-	146	1	hypothetical protein			0	1.5	0	0	0

## Sheet: Toxocara
Chromosome	Start	End	Transcript_name	Strand	Tx_length	# of Exons	Annotation	Conserved in Ascaris eliminated genes	Conserved in Parascaris eliminated genes	Male reproductive tissue	Male anterior body	Female reproductive tissue	Female anterior body	Larvae L3	Male gut	Female gut
Tg0128	512969	522594	MSTRG.10145.1	+	9625	10	hypothetical protein	AgE13_g012_t01	PgE116_g002_t04,PgE270_g002_t01	2.47	11.87	20.83	9.64	0.04	0.89	2.1
Tg0128	528030	538912	MSTRG.10147.2	-	10882	10	zinc-binding dehydrogenase family protein	AgE03_g025_t01	PgE117_g002_t03,PgE356_g001_t01	561.78	233.27	12.37	6.87	0.25	20.6	1.37
Tg0128	540036	541903	MSTRG.10148.1	+	1867	2	hypothetical protein	AgE14_g001_t02,AgE14_g001_t02	PgE010_g003_t01,PgE010_g003_t01	60.77	45.55	3.02	2.59	0.14	3.2	0.18
Tg0128	543228	553391	MSTRG.10149.1	+	10163	4	hypothetical protein			388.84	98.44	0.27	0.14	0.07	8.32	0.01
Tg0128	556513	573671	MSTRG.10150.8	-	17158	13	Kelch-like protein 10	AgB15X_g001_t02,AgB15X_g001_t02,AgE51_g001_t01,AgE51_g001_t01,AgE51_g001_t01,AgB21_g001_t02,AgB21_g001_t02	PgE019_g002_t05	81.22	39.29	0.95	0.45	0.02	3.47	0.1
Tg0128	573791	574201	MSTRG.10151.1	+	410	2	hypothetical protein			0.2	0	0	0	0	0	0
Tg0128	575457	578868	MSTRG.10152.1	-	3411	3	hypothetical protein			7.69	4.71	1.81	1.05	4.98	2.53	0.58
Tg0128	581200	588287	MSTRG.10153.1	+	7087	9	pdz domain containing protein	AgE24_g008_t03	PgE068_g004_t02	170.94	120.27	0.15	0.07	0.05	9.36	0.02
Tg0128	590664	598769	MSTRG.10154.1	+	8105	8	2-amino-3-ketobutyrate coenzyme A ligase	AgE22_g009_t01,AgE22_g011_t01	PgE050_g001_t02,PgE076_g001_t03	19.89	39.7	0.05	0.04	0.01	3.11	0.01
Tg0128	596649	619895	MSTRG.10155.1	-	23246	11	2-amino-3-ketobutyrate coenzyme A ligase	AgE22_g009_t01	PgE050_g001_t02	38.57	13.67	0.05	0.05	0.01	1.4	0
Tg0128	621481	624711	MSTRG.10156.1	-	3230	5	Methylmalonyl-CoA epimerase	AgE03_g012_t04	PgE067_g001_t05	1119.95	365.16	2.3	1.86	0.14	25.84	0.14
Tg0132	130366	184583	MSTRG.10324.1	+	54217	3	hypothetical protein			0.62	2.09	9.35	7.06	1.92	7.42	9.61
Tg0132	143191	162380	MSTRG.10325.2	-	19189	14	hypothetical protein	AgE06_g019_t04	PgE016_g003_t05,PgE101_g001_t01	39.66	21.92	2.22	1.48	0.04	2.34	0.34
Tg0133	584440	595105	MSTRG.10387.1	+	10665	8	Glycine receptor subunit beta			0.31	1.43	2.41	1.04	5.66	0.23	0.18
Tg0133	597928	619006	MSTRG.10388.3	-	21078	26	Kinesin-like protein KIF14	AgE23_g009_t01,AgB02_g486_t01,AgB02_g486_t01		12.04	19.48	14.63	9.43	1.76	2.87	1.95
Tg0143	23702	43089	MSTRG.10800.2	-	19387	3	Major sperm protein isoform beta	AgE02_g015_t02,AgE02_g017_t01,AgE02_g037_t01,AgE02_g016_t01,AgE02_g005_t06	PgE404_g001_t01,PgE404_g002_t01,PgE029_g002_t01	7377.87	1751.29	3.22	2.13	0.7	122.13	0.16
Tg0143	44787	46356	MSTRG.10802.1	+	1569	2	hypothetical protein			0.69	0.08	0.04	0	0	0	0
Tg0143	48018	49033	MSTRG.10804.1	+	1015	2	hypothetical protein			1.66	0.22	0	0	0	0.07	0
Tg0143	48019	49033	MSTRG.10805.1	-	1014	2	hypothetical protein			36.51	4	0.11	0.03	0	0.2	0
Tg0143	56029	82511	MSTRG.10807.1	+	26482	5	GILT-like protein C02D5.2			0.04	0.19	85.25	8.07	1.23	0.14	0.29
Tg0143	401840	409232	MSTRG.10835.1	+	7392	3	hypothetical protein			9.46	6.64	0.03	0.01	0	0.79	0
Tg0143	409567	426134	MSTRG.10836.1	-	16567	9	hypothetical protein	AgB03_g001_t02	PgE018_g001_t01	166.66	77.13	0.08	0.13	0.03	6.93	0.02
Tg0143	429684	442685	MSTRG.10838.3	+	13001	10	26S protease regulatory subunit 7			41.79	44.03	47.8	23.57	0.05	3.92	4.59
Tg0143	445739	459202	MSTRG.10839.1	-	13463	11	hypothetical protein			4.08	14.89	9.2	6.08	0.32	0.9	0.6
Tg0143	462606	473073	MSTRG.10841.1	+	10467	6	hypothetical protein	AgB01_g833_t04	PgE053_g001_t02	53.67	138.13	91.5	47.49	0.4	8.96	13.55
Tg0143	477252	482766	MSTRG.10844.1	-	5514	3	hypothetical protein			0.48	0.19	0.19	0.1	0	0.02	0
Tg0143	491477	493534	MSTRG.10845.1	-	2057	2	hypothetical protein			0.28	0.29	0.15	0.02	0	0.03	0
Tg0143	493650	510193	MSTRG.10846.1	-	16543	11	DnaJ dnj-5	AgE18_g007_t06,AgB20_g010_t01	PgE061_g001_t06	225.98	126.96	0.08	0.19	0.03	12.35	0.02
Tg0143	515790	539503	MSTRG.10847.9	+	23713	16	hypothetical protein	AgE26_g004_t04,AgE27_g001_t07,AgE27_g001_t07,AgE27_g001_t07,AgE27_g001_t07,AgE27_g001_t07,AgE03_g020_t01,AgE15_g011_t01	PgB22_g040_t02,PgB22_g040_t02	150.9	90.43	1.48	0.69	0.06	7.83	0.08
Tg0143	558885	561803	MSTRG.10850.1	-	2918	3	hypothetical protein			0.39	0	0.05	0.11	0	0	0
Tg0143	561888	571446	MSTRG.10851.2	-	9558	4	Leptin receptor gene-related protein			38.87	14.59	3.92	2.09	0.01	1.42	0.27
Tg0143	568818	571346	MSTRG.10852.1	+	2528	2	hypothetical protein			0	0	0.08	0	0	0	0
Tg0144	9736	11728	MSTRG.10857.1	-	1992	2	hypothetical protein			0.1	0.17	0.66	0.4	0.56	0.26	0.19
Tg0157	429175	444196	MSTRG.11410.1	+	15021	4	Aconitate hydratase, mitochondrial			3.18	2.89	0.72	0.31	1.25	0.66	0.06
Tg0157	435025	436898	MSTRG.11411.1	+	1873	2	hypothetical protein			0	0	0	0	0.89	0	0
Tg0157	435043	436898	MSTRG.11412.1	-	1855	2	hypothetical protein			10.52	0.56	6.96	3.96	14.05	0.2	0.35
Tg0157	442349	453943	MSTRG.11413.2	-	11594	8	Acyl-protein thioesterase 1	AgE04_g026_t02,AgE04_g026_t02,AgE04_g026_t02	PgE002_g005_t01	17.6	12.97	0.06	0.02	0.01	1.2	0
Tg0157	455307	456980	MSTRG.11414.1	+	1673	2	hypothetical protein			0.64	1.63	1.54	0.56	1.51	0.92	0.35
Tg0157	458834	466862	MSTRG.11416.1	-	8028	6	filamin-a		PgE285_g001_t01	0.14	0.39	0.81	0.19	0	0.03	0.03
Tg0157	472571	519827	MSTRG.11418.12	+	47256	41	filamin-a		PgE285_g001_t01,PgE051_g003_t01	9.6	57.17	67.58	36.45	0.12	4.3	8.52
Tg0157	528307	535991	MSTRG.11421.1	-	7684	6	hypothetical protein			49.58	30.02	1.18	0.72	0.04	3.01	0.08
Tg0157	528604	532568	MSTRG.11422.2	+	3964	3	hypothetical protein			4.01	1.82	0.18	0.15	0	0.29	0.01
Tg0163	445280	505904	MSTRG.11664.1	-	60624	10	Retrotransposable element Tf2 155 kDa protein type 1	AgB07_g005_t01	PgE295_g001_t02	4.02	0.74	0.1	0.08	0.26	0.1	0.03
Tg0163	473174	486743	MSTRG.11666.2	-	13569	8	hypothetical protein			0.71	1.51	1.6	0.68	0.07	0.11	0.13
Tg0163	487640	492667	MSTRG.11667.2	-	5027	4	hypothetical protein			9.67	49.98	42.72	21.71	0.34	3.88	3.19
Tg0163	497613	505904	MSTRG.11668.1	+	8291	5	rnase h family protein	AgE01_g054_t02	PgE005_g004_t04	150.92	43.21	0.14	0.1	0.03	5.33	0.04
Tg0163	503220	503881	MSTRG.11669.1	-	661	2	rnase h family protein	AgE01_g054_t02		0	0	0	0	0	0	0
Tg0163	511351	515598	MSTRG.11670.1	-	4247	5	tyrosine-protein kinase fps85d	AgB33_g008_t01,AgB33_g008_t01,AgE03_g026_t04,AgE03_g026_t04,AgE02_g027_t05,AgB34_g005_t05,AgB29_g016_t02,AgE04_g018_t07,AgE03_g022_t01,AgE03_g022_t01,AgE12_g003_t14	PgB25_g019_t01,PgB25_g019_t01,PgB25_g019_t01,PgB25_g019_t01,PgE056_g003_t06,PgE056_g003_t06,PgB37_g005_t03,PgB37_g005_t03,PgE277_g001_t02,PgE088_g002_t01	117.57	47.06	0.09	0.09	0.04	3.74	0
Tg0163	519076	530161	MSTRG.11671.1	+	11085	8	Tyrosine-protein kinase Fes/Fps	AgE11_g002_t03		49.2	30.12	0.11	0.12	0.03	3.6	0.02
Tg0177	451538	454210	MSTRG.12258.1	-	2672	2	hypothetical protein			10.7	5.3	16.52	8.75	0.06	0.49	1.71
Tg0177	454266	465552	MSTRG.12259.2	-	11286	8	hypothetical protein			20.3	7.6	3.25	3.15	0	0.74	0.39
Tg0177	470277	473883	MSTRG.12260.2	-	3606	4	hypothetical protein			1.49	6.84	5.86	2.85	0.03	0.6	0.59
Tg0177	474391	487276	MSTRG.12261.12	-	12885	9	HORMA domain-containing protein 1	AgE25_g010_t01	PgE005_g007_t04	3.11	10.56	15.91	9.26	0.08	0.76	1.67
Tg0177	495582	505981	MSTRG.12265.1	-	10399	8	Choline transporter-like protein 4			0.04	0.13	1.37	0.78	2.55	0.02	0.22
Tg0190	179942	194129	MSTRG.12747.1	-	14187	11	Tetratricopeptide repeat protein 38			0.63	2.74	3.98	5.44	4	15.2	4.96
Tg0190	195590	202709	MSTRG.12748.1	+	7119	3	hypothetical protein			0.03	0.14	1.31	0.68	0	0.01	0.05
Tg0196	462198	470066	MSTRG.12983.2	+	7868	6	Proto-oncogene serine/threonine-protein kinase pim-1	AgE06_g013_t01,AgE23_g001_t01,AgB29_g005_t02,AgE16_g006_t02,AgE04_g034_t02,AgE17_g009_t02	PgE039_g003_t02,PgE222_g001_t02,PgE025_g001_t01,PgB02X_g220_t02	0.93	2.41	124.3	65.21	0	0.49	12.59
Tg0196	464375	470066	MSTRG.12984.2	-	5691	3	Proto-oncogene serine/threonine-protein kinase pim-1	AgE06_g013_t01,AgE06_g013_t01,AgE06_g013_t01	PgE039_g003_t02,PgE039_g003_t02,PgE039_g003_t02	0.3	0.65	14.43	7.98	0.02	0.09	1.26
Tg0200	83106	84006	MSTRG.13081.2	-	900	2	hypothetical protein			0	0.4	0	8.21	0	0.05	0
Tg0200	83183	87733	MSTRG.13082.1	+	4550	3	cre-grl-4 protein		PgE754_g001_t01	0.69	348.66	1.22	912.82	3.27	9.39	6.06
Tg0208	1512	14309	MSTRG.13349.2	+	12797	6	hypothetical protein			47.66	17.84	0.08	0.02	0.01	1.68	0
Tg0208	11177	20513	MSTRG.13350.1	-	9336	3	hypothetical protein			0.13	0.17	0.55	0.49	0.02	0.02	0
Tg0208	17235	26823	MSTRG.13351.1	+	9588	7	hypothetical protein			8.56	5.13	0.21	0.1	0	0.46	0.01
Tg0208	26435	28683	MSTRG.13352.1	-	2248	2	hypothetical protein			5.11	4.52	0.18	0.05	0	0.33	0.01
Tg0208	30908	32196	MSTRG.13354.1	-	1288	2	hypothetical protein			0.13	0.09	0.65	0.66	0	0	0.09
Tg0208	40949	49097	MSTRG.13356.2	-	8148	5	Serine/threonine-protein phosphatase PP1	AgE09_g002_t06,AgE09_g002_t06,AgE09_g002_t06,AgE05_g011_t03,AgE05_g011_t03,AgE01_g035_t04,AgE07_g011_t02,AgB29_g017_t04,AgE12_g002_t11,AgE03_g028_t02	PgE043_g004_t02,PgE043_g004_t02,PgE043_g004_t02,PgE043_g004_t02,PgE215_g001_t01,PgE204_g001_t01,PgE094_g001_t03,PgE056_g002_t02	17.73	26.98	5.33	2.85	0.19	2.03	0.49
Tg0208	51210	76029	MSTRG.13357.2	+	24819	15	hypothetical protein	AgE10_g009_t02	PgE070_g002_t03	7.51	16.24	8.8	3.95	0.05	1.19	0.89
Tg0208	97983	111462	MSTRG.13358.5	+	13479	9	hypothetical protein	AgE18_g010_t01	PgE202_g001_t02	143.41	102.46	3.32	1.25	0.11	9.27	0.15
Tg0208	80828	97881	MSTRG.13359.1	-	17053	10	hypothetical protein	AgE26_g004_t04,AgE68_g001_t03	PgB22_g040_t02,PgE018_g002_t01	152	143.51	0.3	0.28	0.09	11.38	0.08
Tg0208	109165	110912	MSTRG.13360.1	-	1747	2	hypothetical protein			7.96	4.04	6.8	3.13	0	0.44	0.57
Tg0208	109773	111896	MSTRG.13361.1	-	2123	2	hypothetical protein			0.58	0.95	0	0	0	0.13	0
Tg0208	112624	115268	MSTRG.13362.1	+	2644	3	hypothetical protein			95.85	23	0.04	0.04	0.05	2	0
Tg0208	112704	114284	MSTRG.13363.1	-	1580	2	hypothetical protein			6.46	0.66	0.13	0	0	0.19	0
Tg0208	117140	123438	MSTRG.13365.1	-	6298	5	Serine/threonine-protein kinase	AgE05_g002_t01,AgB21_g003_t02,AgE06_g006_t01,AgE26_g003_t02,AgB33_g007_t02,AgB26_g001_t02,AgE01_g016_t01,AgE57_g001_t04,AgE03_g039_t02,AgE22_g012_t05	PgE078_g001_t01,PgE149_g003_t02,PgB10_g103_t01,PgE498_g001_t01,PgB22_g041_t04,PgB25_g018_t01,PgE021_g005_t04,PgE232_g001_t04,PgE156_g001_t11,PgE111_g002_t03,PgE397_g001_t01,PgE059_g007_t01,PgE034_g004_t01	369.18	274.54	0.89	0.72	0.23	21.77	0.11
Tg0208	123899	128470	MSTRG.13367.1	-	4571	2	Serine/threonine-protein kinase	AgE05_g017_t01,AgE05_g016_t01	PgE078_g001_t01	16.01	18.61	0.38	0.17	0.01	1	0
Tg0208	130450	140738	MSTRG.13368.2	-	10288	7	Serine/threonine-protein kinase	AgE05_g002_t01,AgB21_g003_t02,AgE06_g006_t01,AgB33_g007_t02,AgE26_g003_t02,AgB26_g001_t02,AgE01_g016_t01,AgE57_g001_t04,AgE03_g039_t02,AgE22_g012_t05,AgB14_g003_t05	PgE078_g001_t01,PgE149_g003_t02,PgB10_g103_t01,PgB25_g018_t01,PgE498_g001_t01,PgB22_g041_t04,PgE021_g005_t04,PgE232_g001_t04,PgE111_g002_t03,PgE156_g001_t11,PgE397_g001_t01	205.83	85.76	0.09	0.07	0.1	8.1	0.02
Tg0208	130450	131937	MSTRG.13369.1	+	1487	2	hypothetical protein			53.77	8.32	0.04	0.01	0.03	0.64	0
Tg0208	136634	138363	MSTRG.13370.1	+	1729	2	Serine/threonine-protein kinase	AgE05_g002_t01,AgE05_g002_t01,AgB21_g003_t02,AgE06_g006_t01,AgB33_g007_t02	PgE498_g001_t01,PgE078_g001_t01,PgE078_g001_t01,PgB10_g103_t01,PgB25_g018_t01,PgB25_g018_t01,PgE397_g001_t01	2.89	0.93	0.06	0.03	0	0.08	0
Tg0208	143348	152355	MSTRG.13371.1	+	9007	8	serine threonine-protein kinase pelle	AgE07_g009_t01,AgE07_g009_t01,AgB01_g831_t04	PgB03_g172_t06,PgB03_g172_t06,PgE083_g002_t03	55.28	23.93	0.04	0	0	2.35	0.01
Tg0208	155738	157918	MSTRG.13372.2	-	2180	2	hypothetical protein			1	5.22	11.59	4.93	0.03	0.38	1.07
Tg0208	158358	178953	MSTRG.13373.1	-	20595	12	Fem-3 mRNA-binding factor 2	AgE23_g005_t02,AgE13_g013_t01,AgB34_g002_t01	PgE079_g002_t06,PgE134_g002_t01,PgE024_g001_t01,PgE007_g004_t01	1.01	3.59	7.02	3.53	0.8	0.59	0.86
Tg0208	181440	182862	MSTRG.13374.1	-	1422	2	hypothetical protein			0.46	0.39	0.08	0.03	0	0	0
Tg0208	183489	194094	MSTRG.13375.1	+	10605	8	hypothetical protein	AgE28_g005_t01	PgE314_g001_t02	52.14	50.85	0.49	0.3	0.06	4.4	0.12
Tg0208	195319	197664	MSTRG.13376.1	+	2345	2	ubiquitin-conjugating enzyme e2 2	AgB17_g102_t01,AgE06_g010_t01,AgE71_g002_t01,AgE01_g010_t01,AgE02_g008_t05,AgE11_g008_t06,AgE13_g010_t02	PgE109_g003_t01,PgE109_g002_t01,PgE111_g001_t01,PgE030_g001_t02	47.1	9.66	0.02	0.01	0	0.94	0
Tg0209	359913	398636	MSTRG.13428.1	-	38723	9	Galectin-6			0.17	0.98	1.42	1.04	2.97	0.33	0.23
Tg0215	0	21919	MSTRG.13604.1	-	21919	13	Histone-lysine N-methyltransferase SUV39H2			0.85	6.21	12.44	6.52	0.06	0.46	1.41
Tg0215	6208	8162	MSTRG.13605.1	+	1954	2	hypothetical protein			0.12	0.28	0.59	0.12	0	0	0
Tg0215	11824	14726	MSTRG.13606.2	+	2902	2	hypothetical protein			0.09	0.62	1.52	0.87	0	0.08	0.18
Tg0248	369711	391660	MSTRG.14754.8	+	21949	21	E3 ubiquitin-protein ligase HUWE1	AgE03_g001_t23,AgE03_g001_t23,AgE03_g002_t01,AgE03_g003_t01		0.94	9.26	9.13	4.72	2.63	1.24	1.47
Tg0248	382269	384102	MSTRG.14755.2	-	1833	2	E3 ubiquitin-protein ligase HUWE1	AgE03_g001_t23		0	0.17	0.47	0.07	0	0.07	0.03
Tg0248	391760	395521	MSTRG.14756.1	+	3761	2	hypothetical protein			0	0.14	0.65	0.18	0	0	0.03
Tg0262	205923	207257	MSTRG.15152.1	-	1334	2	hypothetical protein			0.86	2.08	0	0	0	0	0
Tg0306	301592	304501	MSTRG.16354.1	+	2909	3	hypothetical protein			6.17	4.76	0.42	0	0.05	0.41	0
Tg0306	303515	331416	MSTRG.16355.1	-	27901	14	Protein CASC3	AgB24_g006_t02		4.3	12.49	9.44	4.67	0.05	0.85	0.77
Tg0306	317700	319728	MSTRG.16356.2	+	2028	3	hypothetical protein			49.62	12.59	0.32	0.2	0	0.93	0
Tg0311	304611	317487	MSTRG.16482.4	+	12876	2	hypothetical protein	AgE04_g005_t01,AgE04_g005_t01,AgE04_g005_t01,AgE04_g005_t01,AgE04_g005_t01,AgE04_g005_t01,AgE04_g005_t01,AgE01_g055_t01,AgE01_g055_t01,AgE01_g055_t01		0.46	1.03	0.57	0.8	0.29	1.5	0.6
Tg0311	304815	313961	MSTRG.16483.1	-	9146	2	hypothetical protein	AgE04_g005_t01,AgE04_g005_t01,AgE04_g005_t01,AgE04_g005_t01,AgE04_g005_t01,AgE04_g005_t01,AgE04_g005_t01,AgE01_g055_t01,AgE01_g055_t01,AgE01_g055_t01		0	0	0	0	0	0	0
Tg0311	307047	316637	MSTRG.16484.4	-	9590	3	hypothetical protein	AgB20_g003_t01,AgB20_g003_t01,AgE22_g001_t03,AgB31X_g003_t01,AgB10_g001_t03,AgE05_g021_t01,AgE04_g002_t01	PgE363_g002_t01,PgE363_g002_t01,PgE660_g001_t01,PgE006_g003_t01	0.8	1.63	0.69	0.57	0.86	1.63	0.45
Tg0311	307047	314656	MSTRG.16485.1	+	7609	2	hypothetical protein			1.52	2.71	2.59	1.19	2.98	0.07	0.1
Tg0315	260765	279489	MSTRG.16579.2	-	18724	12	hypothetical protein	AgB28X_g014_t01	PgE024_g001_t01,PgE007_g004_t01	5.77	17.89	25.12	10.49	0.28	1.41	2.55
Tg0315	278475	286063	MSTRG.16580.1	+	7588	3	hypothetical protein			0.4	0.9	0.77	0.53	0.01	0.06	0.08
Tg0315	281122	293905	MSTRG.16581.1	-	12783	8	Glycogen synthase kinase-3 beta	AgE47_g003_t06,AgE17_g009_t02,AgE04_g034_t02,AgE16_g006_t02,AgE23_g001_t01,AgE03_g026_t04,AgE03_g022_t01,AgB29_g016_t02,AgB34_g005_t05,AgE02_g027_t05,AgE06_g013_t01,AgE12_g003_t14,AgE04_g018_t07,AgB21_g003_t02	PgE028_g001_t03,PgB02X_g220_t02,PgE025_g001_t01,PgE222_g001_t02,PgB25_g019_t01,PgE056_g003_t06,PgE277_g001_t02,PgE088_g002_t01,PgE063_g004_t02,PgE039_g003_t02,PgE348_g001_t01,PgB37_g005_t03,PgB10_g103_t01,PgE002_g006_t01,PgE001_g002_t01,PgE126_g003_t01,PgB02X_g221_t01,PgE022_g006_t02	1.41	5.79	21.21	9.49	0.03	0.49	1.92
Tg0315	298355	308856	MSTRG.16582.2	-	10501	9	PH and SEC7 domain-containing protein 1			11.95	25.17	21.91	10.77	0.11	1.55	2.66
Tg0315	310471	313765	MSTRG.16583.3	+	3294	2	ubiquitin-conjugating enzyme e2 2	AgB17_g102_t01,AgB17_g102_t01,AgE06_g010_t01,AgE06_g010_t01,AgE71_g002_t01,AgE71_g002_t01,AgE13_g010_t02,AgE01_g010_t01	PgE109_g003_t01,PgE109_g003_t01,PgE109_g002_t01,PgE109_g002_t01,PgE111_g001_t01,PgE111_g001_t01,PgE030_g001_t02	0.79	3.12	4.57	3.01	0.01	0.08	0.47
Tg0315	316567	321186	MSTRG.16584.1	-	4619	3	Histone H2B.1/H2B.2		PgB33_g005_t01	8.64	18.32	6.32	2.94	0.04	1.27	0.68
Tg0322	639	4662	MSTRG.16715.1	+	4023	3	hypothetical protein			4.57	1.56	0.01	0	0	0.17	0
Tg0322	14441	16763	MSTRG.16716.1	+	2322	2	hypothetical protein	AgB20_g002_t01	PgE006_g002_t01,PgE006_g002_t01,PgE059_g001_t01,PgE059_g001_t01,PgE003_g006_t01,PgE390_g001_t01,PgE390_g001_t01,PgE027_g002_t01	0.01	0.07	0.94	0.58	0.01	0	0.02
Tg0322	18867	22743	MSTRG.16717.1	-	3876	3	60S ribosomal protein L39			470.28	720.73	717.76	764.88	800.27	449.1	437.83
Tg0328	234354	244138	MSTRG.16867.4	+	9784	8	u1 small nuclear ribonucleoprotein c		PgE103_g004_t02	12.41	13.66	19.14	10.25	0.1	1.18	1.93
Tg0328	249242	259948	MSTRG.16870.5	+	10706	9	Glycogen synthase kinase-3 beta	AgE47_g003_t06,AgE17_g009_t02,AgE04_g034_t02,AgE16_g006_t02,AgE23_g001_t01,AgE02_g027_t05,AgE04_g018_t07,AgE03_g026_t04,AgE03_g022_t01,AgE12_g003_t14,AgE06_g013_t01,AgE07_g012_t01,AgB29_g016_t02,AgE06_g006_t01	PgE028_g001_t03,PgB02X_g220_t02,PgB02X_g221_t01,PgE126_g003_t01,PgE022_g006_t02,PgE028_g002_t01,PgE025_g001_t01,PgE222_g001_t02,PgE056_g003_t06,PgB25_g019_t01,PgB37_g005_t03,PgE348_g001_t01,PgE088_g002_t01	2.66	12.62	18.47	8	0.03	0.96	1.89
Tg0328	261221	273069	MSTRG.16871.4	-	11848	13	Solute carrier family 2	AgB32_g006_t01,AgB02_g473_t01,AgB01_g834_t04,AgB02_g472_t03	PgB45_g001_t01,PgE073_g001_t02,PgE004_g001_t02	454.14	279.4	62.84	31.91	0.17	26.28	6.18
Tg0328	272259	284708	MSTRG.16872.1	+	12449	8	hypothetical protein	AgB06_g005_t04		62.59	37.65	0.06	0.09	0.04	4.01	0.02
Tg0328	283533	289215	MSTRG.16873.1	-	5682	5	hypothetical protein	AgE85_g001_t01	PgE058_g003_t04	62.03	25.2	0.03	0.03	0.01	1.95	0.02
Tg0328	290118	297739	MSTRG.16874.1	+	7621	9	serine threonine-protein kinase	AgE01_g016_t01,AgE26_g003_t02,AgB26_g001_t02,AgE06_g006_t01,AgB33_g007_t02,AgB21_g003_t02,AgE05_g002_t01,AgE57_g001_t04,AgB14_g003_t05,AgE03_g039_t02	PgB22_g041_t04,PgB25_g018_t01,PgE078_g001_t01,PgB10_g103_t01,PgE040_g003_t12,PgE021_g005_t04,PgE232_g001_t04,PgE156_g001_t11,PgE149_g003_t02,PgE498_g001_t01,PgE111_g002_t03,PgE059_g007_t01	22.29	15.11	0.01	0.03	0	1.18	0
Tg0328	301692	305877	MSTRG.16875.1	+	4185	5	hypothetical protein			212.61	96.8	0.15	0.1	0.04	7.85	0
Tg0328	302954	305877	MSTRG.16876.2	-	2923	3	hypothetical protein			0.22	0.08	0	0	0	0	0
Tg0331	286955	290248	MSTRG.16936.3	+	3293	2	hypothetical protein			6.56	10.72	12.45	4.31	0.09	0.8	0.97
Tg0331	291589	297418	MSTRG.16937.1	+	5829	3	hypothetical protein			0.12	0.35	0.04	0.03	0.04	0.01	0
Tg0331	297011	300033	MSTRG.16939.1	+	3022	3	hypothetical protein			2.19	2.1	0.85	0.59	3.29	0.99	0.55
Tg0013	2866	10881	MSTRG.1694.1	-	8015	7	Zinc finger protein with KRAB and SCAN domains 5	AgE13_g008_t01,AgE13_g009_t01	PgE087_g001_t02,PgE087_g003_t01	191.85	53.75	0.09	0.07	0.05	5.37	0.01
Tg0013	13552	27175	MSTRG.1695.4	+	13623	12	Ribonuclease ZC3H12A	AgE02_g006_t11		30.95	14.08	0.3	0.13	0.01	1.71	0.01
Tg0013	29358	34559	MSTRG.1696.1	+	5201	5	Ubiquitin-conjugating enzyme E2 7, partial	AgE13_g010_t02,AgE02_g008_t05,AgE71_g002_t01,AgB17_g102_t01,AgE06_g010_t01,AgE01_g010_t01,AgE11_g008_t06	PgE109_g003_t01,PgE109_g002_t01,PgE111_g001_t01,PgE030_g001_t02	115.73	33.39	0.06	0.1	0.06	3.23	0.04
Tg0013	30587	31469	MSTRG.1697.1	-	882	2	Ubiquitin-conjugating enzyme E2 7, partial	AgE02_g008_t05		1.01	0.4	0	0	0	0.03	0
Tg0013	34648	45301	MSTRG.1698.3	-	10653	7	hypothetical protein	AgB14_g007_t02		11.77	8.18	0.02	0.05	0.04	0.84	0
Tg0344	1757	15635	MSTRG.17220.1	+	13878	8	hypothetical protein			22.26	24.05	62.49	27.03	0.08	1.92	5.04
Tg0344	4690	9882	MSTRG.17221.1	-	5192	2	hypothetical protein			2.28	1.72	1.12	0.87	0	0.2	0.07
Tg0344	13784	15343	MSTRG.17222.1	-	1559	2	hypothetical protein			0.02	0	0	0	0.01	0	0
Tg0344	15680	37986	MSTRG.17223.2	+	22306	13	Tristetraprolin, partial	AgB15X_g003_t01,AgB15X_g003_t01,AgB20_g012_t05,AgB20_g012_t05,AgB28X_g014_t01,AgE04_g014_t01	PgE019_g004_t01,PgE019_g004_t01,PgE020_g002_t01,PgE182_g003_t02,PgB20_g058_t01	0.56	1.07	19.59	8.7	0.4	0.22	1.91
Tg0344	38715	41024	MSTRG.17224.1	-	2309	2	hypothetical protein			0.23	0.44	35.26	14.53	0.23	0.06	2.89
Tg0344	41094	42182	MSTRG.17225.1	-	1088	2	hypothetical protein			0.39	0.45	29.11	11	0.21	0.08	2.8
Tg0344	42693	45398	MSTRG.17226.1	-	2705	2	hypothetical protein			0.12	0.27	0.55	0.26	0.08	0.01	0.05
Tg0344	48716	49166	MSTRG.17227.1	-	450	2	Plexin-D1			0	0	0	0	0.73	0.23	0
Tg0344	50302	63947	MSTRG.17228.1	-	13645	9	Plexin-A2			0.25	0.66	55.59	24.93	2.17	0.48	7.35
Tg0347	242012	266687	MSTRG.17293.2	+	24675	23	hypothetical protein		PgE266_g001_t02	3.18	16.5	11.54	7.69	16.72	18.9	4.33
Tg0347	268058	269934	MSTRG.17294.1	-	1876	2	hypothetical protein			0.36	0.94	2.03	0.8	1.31	0.88	1.13
Tg0352	0	4713	MSTRG.17379.1	-	4713	9	Chondroitin proteoglycan 2		PgE101_g002_t01,PgE101_g002_t01,PgE068_g002_t01,PgE068_g002_t01,PgE068_g002_t01,PgE068_g001_t01,PgE068_g001_t01,PgE068_g001_t01	13.54	27.15	3915.36	1959.54	0.98	12.99	509.57
Tg0352	347	2856	MSTRG.17380.1	+	2509	4	RecName: Full=Ovarian abundant message protein; Short=Protein OAM		PgE068_g002_t01,PgE068_g001_t01,PgE101_g002_t01,PgE101_g002_t01	1.6	2.07	4.86	2.69	0	0	0.97
Tg0352	7330	11416	MSTRG.17381.1	+	4086	5	Major sperm protein	AgB17_g092_t02,AgB03_g008_t05,AgE05_g030_t01	PgE120_g002_t03,PgE136_g002_t04	154.79	102.94	0.11	0.13	0.05	8.12	0.04
Tg0352	16433	33286	MSTRG.17382.1	+	16853	15	hypothetical protein	AgE69_g001_t01	PgE009_g004_t09	80.31	39.94	5.17	2.93	0.06	3.29	0.68
Tg0352	40103	53703	MSTRG.17383.1	+	13600	4	RecName: Full=Ovarian abundant message protein; Short=Protein OAM		PgE068_g002_t01,PgE068_g001_t01,PgE101_g002_t01,PgE101_g002_t01	0	0	27.57	10.82	0	0	1.93
Tg0352	41247	50180	MSTRG.17384.1	-	8933	9	complement component c6	AgE01_g048_t02	PgE105_g002_t03	31.57	16.06	0.07	0.04	0.02	1.37	0.01
Tg0352	41281	42502	MSTRG.17385.1	+	1221	2	hypothetical protein			0.27	0.62	0	0	0	0.03	0
Tg0352	51413	55050	MSTRG.17386.1	-	3637	8	Chondroitin proteoglycan 2		PgE101_g002_t01,PgE101_g002_t01,PgE068_g002_t01,PgE068_g002_t01,PgE068_g002_t01,PgE068_g001_t01,PgE068_g001_t01,PgE068_g001_t01	9.99	10.61	5758.98	3281.66	0.89	15.39	814.84
Tg0352	59702	72482	MSTRG.17387.1	+	12780	7	hypothetical protein	AgE08_g005_t02	PgE078_g004_t01	148.06	193	24.27	12.63	0.12	15.54	1.85
Tg0352	74215	75531	MSTRG.17388.2	-	1316	2	hypothetical protein			0.25	0.88	2.05	0.86	0	0.03	0.2
Tg0352	75637	77820	MSTRG.17389.1	+	2183	2	hypothetical protein			0.5	0	0	0	0	0	0
Tg0352	77141	107177	MSTRG.17390.5	-	30036	19	hypothetical protein	AgE04_g017_t01	PgE074_g001_t01,PgB20_g058_t01,PgE280_g002_t04	43.19	29	66.44	33.51	0.02	2.47	6.93
Tg0352	108323	114242	MSTRG.17391.1	+	5919	5	hypothetical protein			1.22	0.66	0.1	0.06	0	0.04	0.02
Tg0352	110225	113598	MSTRG.17392.1	-	3373	2	hypothetical protein			1.04	4.1	8.28	3.69	0.03	0.25	0.85
Tg0352	114302	123279	MSTRG.17393.1	+	8977	3	hypothetical protein			0.34	0.2	0.07	0	0	0.07	0
Tg0352	116897	123369	MSTRG.17394.1	-	6472	3	ubiquitin-conjugating enzyme e2 2	AgB17_g102_t01,AgE06_g010_t01,AgE71_g002_t01,AgE01_g010_t01,AgE02_g008_t05,AgE13_g010_t02,AgE11_g008_t06	PgE109_g003_t01,PgE109_g002_t01,PgE111_g001_t01,PgE030_g001_t02	17.71	38.94	63.34	36.95	9.1	10.58	14.03
Tg0352	126475	135806	MSTRG.17395.1	+	9331	4	hypothetical protein			0.1	0.31	2.46	1.12	0.01	0.03	0.43
Tg0352	140722	155241	MSTRG.17396.1	+	14519	8	Polyadenylate-binding protein 1	AgE04_g024_t03		2.26	9.9	13.06	5.98	0.06	0.77	1.52
Tg0352	158755	160621	MSTRG.17399.1	-	1866	2	Tristetraprolin, partial	AgB15X_g003_t01		0.03	0.29	2.19	1.87	0.24	0	0.21
Tg0352	162886	169471	MSTRG.17401.1	-	6585	6	Tristetraprolin, partial	AgB15X_g003_t01,AgB20_g012_t05,AgE04_g014_t01	PgE019_g004_t01,PgE020_g002_t01,PgE182_g003_t02	0.19	0.36	19.07	9.46	0.51	0.02	2.29
Tg0352	171671	178099	MSTRG.17402.1	-	6428	7	hypothetical protein		PgE042_g001_t01,PgE042_g003_t01	41.3	26.64	0.78	0.48	0.06	2.25	0.05
Tg0352	188184	196558	MSTRG.17403.3	+	8374	9	hypothetical protein	AgB20_g010_t01,AgE18_g007_t06,AgB20_g011_t01	PgE061_g001_t06	146.92	77.38	0.84	0.51	0.11	8.95	0.16
Tg0352	203656	221222	MSTRG.17404.3	-	17566	10	Cytospin-A			0.65	3.05	6.79	3.25	0.02	0.23	0.73
Tg0352	226182	236920	MSTRG.17406.1	+	10738	10	ankyrin repeat domain-containing protein 12	AgE01_g024_t03	PgB32_g014_t01	1.23	1.84	502.53	199.91	0.11	1.41	45.67
Tg0352	241264	247914	MSTRG.17407.2	-	6650	3	hypothetical protein	AgE08_g005_t02		0.75	1.29	1.98	0.91	0.01	0.08	0.36
Tg0352	251842	262540	MSTRG.17408.3	+	10698	8	hypothetical protein			116.22	63.81	0.47	0.18	0.02	6.12	0.06
Tg0352	264633	266959	MSTRG.17409.1	+	2326	3	hypothetical protein			0.13	0.36	0.28	0.13	0.08	0.03	0.02
Tg0368	0	2303	MSTRG.17730.1	+	2303	3	Histone-lysine N-methyltransferase SETD1B			0.39	3.01	4.95	2.43	0.02	0.3	0.62
Tg0368	26322	42854	MSTRG.17731.33	+	16532	8	26S proteasome non-ATPase regulatory subunit 12, partial	AgB04_g460_t04,AgB04_g460_t04	PgE214_g001_t03,PgE214_g001_t03,PgB17_g068_t01	14.9	19.32	8.79	4.13	0.08	2.2	0.79
Tg0368	20861	23762	MSTRG.17732.1	+	2901	2	hypothetical protein			7.8	4.75	0.02	0	0	0.41	0
Tg0368	22902	31778	MSTRG.17733.3	-	8876	3	hypothetical protein			35.71	19.23	0	0.09	0	3.22	0
Tg0368	30901	34601	MSTRG.17734.1	-	3700	2	26S proteasome non-ATPase regulatory subunit 12, partial	AgB04_g460_t04,AgB04_g460_t04	PgE214_g001_t03,PgE214_g001_t03	1	0.7	0.22	0.09	0	0.05	0.02
Tg0368	47525	60446	MSTRG.17737.1	-	12921	10	Trypsin alpha			14.03	8.37	0.08	0.04	0.01	0.88	0.01
Tg0368	72920	95505	MSTRG.17738.1	+	22585	16	Epidermal growth factor receptor			28.81	25	0.23	0.13	0.04	2.28	0.02
Tg0368	81651	85337	MSTRG.17739.1	-	3686	2	hypothetical protein			6.1	5.6	0	0	0	0.27	0
Tg0368	97256	108554	MSTRG.17740.1	+	11298	5	hypothetical protein		PgE038_g003_t05	67.32	42.38	0.04	0.07	0.04	4.31	0.01
Tg0368	104144	105528	MSTRG.17741.1	-	1384	2	hypothetical protein			0.23	0.16	0	0	0	0	0
Tg0368	110042	111465	MSTRG.17743.1	-	1423	2	Telomerase-binding protein EST1A	AgE01_g053_t05	PgE190_g003_t01	0.37	0.1	0	0.06	0	0	0
Tg0368	113515	121155	MSTRG.17745.1	+	7640	7	Apolipoprotein(a)			169.67	61.66	0.03	0.09	0.02	5.49	0
Tg0368	124363	127762	MSTRG.17746.1	-	3399	2	hypothetical protein			0.02	0	0.27	0.18	0.37	0.03	0.02
Tg0368	124388	127762	MSTRG.17747.1	+	3374	2	hypothetical protein			0.85	0.47	0.03	0.05	0	0.12	0.02
Tg0368	128029	131224	MSTRG.17748.1	+	3195	5	hypothetical protein			0.57	0.46	0.35	0.34	0	0.05	0.01
Tg0368	134090	135332	MSTRG.17749.1	+	1242	2	hypothetical protein			0.95	1.24	1.39	0.92	0.2	0.12	0.21
Tg0368	138053	151047	MSTRG.17750.4	-	12994	9	Eukaryotic translation initiation factor 4E-3	AgE49_g003_t01,AgE49_g003_t01	PgB39_g004_t03	60.33	42.88	0.05	0.02	0	4.18	0.01
Tg0368	159673	166836	MSTRG.17752.1	-	7163	6	Serine/threonine-protein phosphatase PGAM5, mitochondrial			51.8	29.18	0.12	0.09	0.03	2.77	0
Tg0368	168769	172165	MSTRG.17753.1	-	3396	2	hypothetical protein	AgE77_g003_t01,AgE77_g003_t01,AgE77_g003_t01,AgE77_g003_t01,AgE77_g003_t01	PgE550_g001_t01	0.38	0.14	0.03	0.02	0	0.01	0
Tg0368	174793	181716	MSTRG.17755.1	-	6923	2	hypothetical protein			22.64	7.59	0.04	0	0.01	0.92	0
Tg0368	176067	178937	MSTRG.17756.1	+	2870	2	hypothetical protein			0.39	0.08	0.31	0.27	0	0	0
Tg0368	185067	233031	MSTRG.17757.1	+	47964	16	Excitatory amino acid transporter	AgE04_g019_t01,AgE04_g019_t01,AgB04_g462_t03	PgE048_g002_t02,PgE048_g002_t02,PgE302_g001_t01,PgB17_g069_t01,PgE465_g001_t02	31.65	25.63	2.13	1.07	0.01	2.2	0.21
Tg0368	197277	197989	MSTRG.17758.1	-	712	2	26s proteasome non-atpase regulatory subunit 12	AgB04_g460_t04	PgB17_g068_t01	2.55	2.15	0.12	0	0	0.12	0
Tg0368	201338	202938	MSTRG.17759.1	+	1600	2	hypothetical protein			0.44	1.61	0.74	0.49	0	0.05	0.08
Tg0368	233277	240634	MSTRG.17760.1	+	7357	4	40s ribosomal protein s2		PgE024_g001_t01,PgE007_g004_t01	5.46	4.33	1.03	0.46	0	0.48	0.07
Tg0368	244832	248731	MSTRG.17761.4	-	3899	2	hypothetical protein			0.04	0.1	5.74	1.48	0	0	0.09
Tg0368	244832	248731	MSTRG.17762.6	+	3899	2	hypothetical protein			0.02	0.03	5.81	1.18	0.01	0.02	0.04
Tg0369	1382	4218	MSTRG.17764.1	-	2836	2	hypothetical protein	AgB20_g006_t01	PgE569_g001_t01,PgE566_g001_t01,PgE676_g001_t01,PgE443_g002_t01,PgE390_g001_t01,PgE059_g001_t01,PgB11_g084_t01,PgB03_g174_t01,PgE003_g006_t01	0.55	0.27	0.02	0.01	0	0.02	0
Tg0369	4286	5490	MSTRG.17765.1	-	1204	2	Tau-tubulin kinase 2	AgE26_g003_t02,AgE06_g006_t01,AgE01_g016_t01,AgB26_g001_t02,AgB33_g007_t02,AgE05_g002_t01	PgB22_g041_t04,PgB25_g018_t01,PgE078_g001_t01,PgE149_g003_t02	0.72	0.22	0	0.03	0	0.03	0
Tg0369	5601	12925	MSTRG.17766.1	+	7324	8	putative serine threonine-protein kinase	AgE03_g039_t02,AgE05_g002_t01,AgE26_g003_t02,AgB33_g007_t02,AgB26_g001_t02,AgE06_g006_t01,AgE57_g001_t04,AgE22_g012_t05	PgE111_g002_t03,PgE078_g001_t01,PgB22_g041_t04,PgB25_g018_t01,PgE149_g003_t02,PgE021_g005_t04,PgE397_g001_t01,PgE232_g001_t04	125.01	53.73	0.05	0.05	0.02	5.46	0.01
Tg0369	14080	20371	MSTRG.17767.1	+	6291	5	Charged multivesicular body protein 4b			96.9	30.64	0.72	0.34	0	2.81	0.07
Tg0369	22545	22926	MSTRG.17768.1	-	381	2	hypothetical protein			1.64	3.61	0.8	0.25	0	0.26	0.1
Tg0369	24077	36747	MSTRG.17769.3	+	12670	8	Tau-tubulin kinase 1	AgE06_g006_t01,AgE26_g003_t02,AgB26_g001_t02,AgB33_g007_t02,AgE01_g016_t01,AgB21_g003_t02,AgE05_g002_t01,AgE57_g001_t04,AgE02_g042_t01,AgB14_g003_t05,AgE03_g039_t02,AgE22_g012_t05	PgB22_g041_t04,PgB25_g018_t01,PgB10_g103_t01,PgE078_g001_t01,PgE021_g005_t04,PgE149_g003_t02,PgE232_g001_t04,PgE156_g001_t11,PgE111_g002_t03,PgE059_g007_t01,PgE397_g001_t01,PgB41X_g003_t01,PgE498_g001_t01,PgE034_g004_t01	10.89	6.07	0.16	0.11	0.32	0.79	0.05
Tg0369	34669	43608	MSTRG.17770.3	-	8939	8	E3 ubiquitin-protein ligase MARCH8	AgE02_g042_t01,AgE02_g042_t01		123.86	65.08	0.11	0.09	0.12	6.36	0.06
Tg0376	202872	209481	MSTRG.17933.1	-	6609	8	tyrosine-protein kinase fps85d	AgB33_g008_t01,AgE02_g027_t05,AgE03_g026_t04,AgE03_g022_t01,AgB34_g005_t05,AgE04_g018_t07,AgB29_g016_t02,AgE12_g003_t14,AgE04_g029_t08,AgE63_g004_t06,AgE47_g003_t06,AgE23_g001_t01,AgE17_g009_t02,AgE29_g002_t02,AgE06_g006_t01,AgE04_g034_t02,AgB33_g007_t02,AgE07_g012_t01	PgB25_g019_t01,PgE088_g002_t01,PgB37_g005_t03,PgE056_g003_t06,PgE277_g001_t02,PgE063_g004_t02,PgE002_g006_t01,PgE001_g002_t01,PgE222_g001_t02,PgE080_g003_t01,PgE035_g002_t08,PgE021_g005_t04,PgE028_g001_t03,PgB25_g018_t01	101.31	80.03	0.11	0.11	0.06	5.88	0.01
Tg0376	221450	237083	MSTRG.17934.6	+	15633	14	Tyrosine-protein kinase Fes/Fps	AgE11_g002_t03,AgE11_g002_t03,AgE11_g002_t03,AgE07_g004_t04,AgE07_g004_t04,AgE11_g001_t01,AgE11_g001_t01	PgE036_g001_t03,PgB25_g020_t03,PgB25_g020_t03	37.19	23.09	0.46	0.22	0.01	2.72	0.04
Tg0376	218887	221694	MSTRG.17935.1	-	2807	2	Tyrosine-protein kinase Fes/Fps	AgE11_g002_t03		41.49	25.91	0	0.45	0	3.28	0
Tg0376	240054	244598	MSTRG.17936.1	+	4544	2	hypothetical protein	AgB20_g006_t01	PgE006_g002_t01,PgE003_g006_t01,PgE041_g005_t01,PgE006_g003_t01	0.09	0.01	2.47	0.34	0	0	0.03
Tg0376	240627	244599	MSTRG.17937.1	-	3972	2	hypothetical protein	AgB20_g006_t01	PgE006_g002_t01,PgE003_g006_t01,PgE041_g005_t01	0	0.04	1.63	0.23	0.05	0	0
Tg0377	188777	229264	MSTRG.17952.4	-	40487	35	Myosin-VI	AgE46_g003_t05	PgE099_g001_t07,PgB33_g007_t02	80.88	66.38	6.98	4.31	6.8	12.63	2.74
Tg0377	233224	246380	MSTRG.17953.1	+	13156	12	Homeotic protein female sterile	AgE03_g035_t10,AgE03_g038_t01	PgE027_g005_t02,PgE129_g002_t03	13.54	34.63	12.7	7.12	0.07	2.52	1.45
Tg0391	187246	191376	MSTRG.18224.1	+	4130	4	hypothetical protein			80.59	44.04	0.09	0	0	5.36	0
Tg0391	201841	228076	MSTRG.18226.1	+	26235	3	Polyubiquitin-A		PgE009_g005_t05,PgE009_g005_t05,PgE009_g005_t05,PgE009_g005_t05,PgE009_g005_t05,PgE009_g005_t05,PgE009_g005_t05,PgE009_g005_t05,PgE009_g005_t05,PgE009_g005_t05	0.92	4.59	2.83	8.34	17.44	3.73	10.85
Tg0391	213813	214134	MSTRG.18227.1	+	321	2	hypothetical protein			0.54	0	0	0	0	0	0
Tg0392	140126	185092	MSTRG.18243.1	-	44966	23	hypothetical protein	AgE02_g012_t03	PgE103_g001_t02	2.84	9.58	14.93	7.73	0.83	1.15	2.09
Tg0392	187397	189201	MSTRG.18245.1	+	1804	2	hypothetical protein			0.22	0.48	0.05	0.07	0.08	0.02	0
Tg0392	189448	203834	MSTRG.18246.3	-	14386	12	hypothetical protein	AgE01_g015_t01	PgB39_g003_t18	7.43	6.8	0.06	0.09	0.09	0.49	0
Tg0392	207616	214691	MSTRG.18248.2	+	7075	9	Kelch-like protein 10	AgE51_g002_t01		2.11	3.87	665.93	256.76	0.07	2.76	68.64
Tg0014	30924	48304	MSTRG.1828.1	+	17380	20	hypothetical protein	AgB29_g009_t10	PgE026_g003_t02,PgE026_g002_t01	5.08	15.27	5.51	2.83	0.11	1.09	0.73
Tg0014	64434	71237	MSTRG.1829.2	-	6803	6	hypothetical protein			10.64	7.61	0.25	0.06	0	0.83	0.03
Tg0014	47003	49130	MSTRG.1830.1	-	2127	2	hypothetical protein			0.56	2.97	0	0	0.05	0.09	0
Tg0014	51726	60915	MSTRG.1831.1	+	9189	11	Tyrosine-protein phosphatase non-receptor type 9	AgB20_g013_t01,AgE02_g002_t03,AgE28_g004_t01,AgE09_g001_t01	PgE229_g002_t04,PgE293_g001_t01,PgE029_g001_t02,PgE020_g001_t04	49.26	34.62	0.03	0.04	0.01	3.62	0.01
Tg0397	86	1646	MSTRG.18315.1	-	1560	2	hypothetical protein			5.59	4.01	0	0	0	0.72	0
Tg0397	2386	4002	MSTRG.18316.1	+	1616	2	hypothetical protein			4.32	3.8	0	0	0	0.38	0
Tg0397	6061	41352	MSTRG.18317.15	+	35291	22	hypothetical protein	AgE27_g002_t02,AgE27_g002_t02,AgE12_g003_t14,AgB34_g005_t05,AgE02_g027_t05,AgB29_g016_t02,AgE03_g026_t04,AgE04_g018_t07,AgE03_g022_t01,AgE29_g002_t02,AgB21_g003_t02	PgE147_g001_t10,PgE080_g003_t01,PgE489_g001_t02,PgE088_g002_t01,PgB25_g019_t01,PgE277_g001_t02,PgB37_g005_t03,PgE056_g003_t06,PgE063_g004_t02,PgE035_g002_t08,PgE002_g006_t01,PgE001_g002_t01,PgB10_g103_t01	14.16	10.24	0.06	0.04	0.05	0.91	0.01
Tg0397	13969	16440	MSTRG.18318.1	-	2471	2	hypothetical protein		PgE147_g001_t10	0.29	0.51	0	0.01	0	0.09	0
Tg0397	29954	40653	MSTRG.18319.1	-	10699	3	hypothetical protein			0.05	0.29	0.04	0.1	3.24	0.02	0
Tg0400	11023	28220	MSTRG.18387.3	-	17197	6	megakaryocyte-associated tyrosine-protein kinase	AgE09_g017_t01,AgB12_g002_t10	PgB18_g049_t02,PgB18_g049_t02	21.41	34.75	1.57	0.85	0.02	2.42	0.08
Tg0400	46401	61856	MSTRG.18388.5	-	15455	12	Tau-tubulin kinase 2	AgE22_g012_t05,AgE57_g001_t04,AgB21_g003_t02,AgE05_g002_t01,AgB33_g007_t02,AgE06_g006_t01,AgB26_g001_t02,AgE26_g003_t02,AgE01_g016_t01	PgE232_g001_t04,PgE397_g001_t01,PgB10_g103_t01,PgE263_g002_t01,PgE078_g001_t01,PgE263_g001_t01,PgB25_g018_t01,PgE021_g005_t04,PgB22_g041_t04,PgE149_g003_t02	32.5	23.54	0.07	0.02	0.03	2.2	0
Tg0400	73795	75663	MSTRG.18390.1	+	1868	2	hypothetical protein			0.92	0.76	0.59	0.93	0.65	1.8	1.21
Tg0400	73797	75641	MSTRG.18391.1	-	1844	2	hypothetical protein			0	0.7	0.79	1	0.8	1.1	1.56
Tg0400	80836	86137	MSTRG.18392.1	-	5301	5	hypothetical protein	AgB14_g007_t02		33.62	17.03	0.04	0.02	0.01	1.47	0
Tg0400	93490	103045	MSTRG.18393.4	-	9555	3	Chromobox protein homolog 1			0.44	1.33	0.76	0.33	0	0.05	0.03
Tg0400	93482	97627	MSTRG.18394.1	+	4145	2	Chromobox protein homolog 1			0.48	1.26	0.66	0.22	0	0.14	0.06
Tg0400	104353	114707	MSTRG.18395.2	+	10354	10	f-box domain containing protein	AgE08_g016_t05,AgB29_g012_t06	PgE238_g001_t01,PgE199_g001_t01,PgE183_g002_t04	58.73	19.35	0.54	0.25	0.08	1.98	0.02
Tg0400	107849	110156	MSTRG.18396.1	-	2307	2	f-box domain containing protein	AgE08_g016_t05	PgE199_g001_t01	0.04	0.14	3.18	1.1	0.43	0.01	0.22
Tg0400	120642	166747	MSTRG.18398.1	-	46105	30	Poly(A) RNA polymerase gld-2	AgE36_g004_t05,AgE36_g004_t05,AgE61_g003_t01,AgB30_g001_t04	PgB08_g098_t01,PgB04_g196_t01	2.15	8.94	8.02	3.61	0.08	0.86	0.98
Tg0400	167008	173733	MSTRG.18399.1	+	6725	3	DAZ protein 1		PgE226_g001_t05	2.62	3.76	0.2	0.41	1.3	1.09	0.16
Tg0400	169122	181808	MSTRG.18400.1	-	12686	8	DAZ protein 1		PgE226_g001_t05	28.06	21.06	0.15	0.1	0	1.79	0.01
Tg0400	184875	188617	MSTRG.18401.1	+	3742	2	hypothetical protein			0.96	1.41	0.11	0.08	0.01	0.19	0.01
Tg0400	190674	196618	MSTRG.18402.1	+	5944	7	hypothetical protein			15.58	10.21	0.19	0.19	0.05	1.04	0.03
Tg0400	193065	202745	MSTRG.18403.1	-	9680	6	hypothetical protein			11.4	4.37	0.04	0.02	0.03	0.43	0
Tg0400	204319	218366	MSTRG.18405.3	-	14047	10	hypothetical protein	AgE28_g009_t02		51.93	32.05	0.05	0.04	0.02	2.64	0.02
Tg0401	0	17814	MSTRG.18406.1	+	17814	15	Bestrophin-3			6.65	13.95	5.99	2.86	0.01	1.26	0.49
Tg0401	23446	48054	MSTRG.18407.4	-	24608	14	eukaryotic translation initiation factor 3 subunit i	AgE01_g040_t03,AgE04_g032_t03	PgE038_g004_t01,PgE378_g001_t01,PgE417_g001_t03	2.2	11.61	25.56	12.07	0.07	0.99	2.64
Tg0401	22619	25998	MSTRG.18408.1	+	3379	2	hypothetical protein			2.39	1.85	0.07	0.02	0	0.1	0
Tg0401	49714	52220	MSTRG.18409.1	+	2506	2	hypothetical protein			0.07	0.29	1.43	0.68	0.16	0.06	0
Tg0401	56331	63097	MSTRG.18411.2	+	6766	8	hypothetical protein	AgE02_g019_t02		12.74	10	0.08	0.04	0.2	1.1	0.02
Tg0409	0	13006	MSTRG.18545.1	-	13006	11	ubiquitin-conjugating enzyme e2 2	AgB17_g102_t01,AgE06_g010_t01,AgE28_g005_t01,AgE71_g002_t01,AgE01_g010_t01,AgE13_g010_t02	PgE109_g003_t01,PgE109_g002_t01,PgE111_g001_t01,PgE314_g001_t02,PgE030_g001_t02,PgE183_g002_t04	15.22	7.51	0.14	0.11	0	0.8	0.03
Tg0409	13890	46081	MSTRG.18546.2	-	32191	21	hypothetical protein	AgE10_g009_t02,AgE09_g016_t01,AgE08_g011_t02	PgE070_g002_t03,PgE041_g003_t03,PgE022_g005_t04,PgE041_g001_t02,PgE054_g005_t01	11.72	10.12	1.89	0.98	0.18	0.95	0.23
Tg0413	274	2167	MSTRG.18615.2	+	1893	3	hypothetical protein			0.43	1.92	4.16	2.46	0.29	0.11	0.41
Tg0413	2496	47382	MSTRG.18616.4	-	44886	34	regulator of microtubule dynamics protein 2	AgE01_g017_t03,AgE25_g002_t05,AgE02_g019_t02,AgE02_g019_t02,AgE04_g026_t02	PgE412_g001_t01,PgB36X_g003_t01	165.12	108.68	0.97	0.51	0.07	10.54	0.1
Tg0413	52781	69174	MSTRG.18617.3	-	16393	11	Protein BTR1			2.22	9.08	7.96	3.98	1.2	0.79	0.96
Tg0413	77798	100277	MSTRG.18618.5	-	22479	13	btb poz domain containing protein	AgE01_g038_t06,AgE04_g037_t02	PgE102_g002_t06	34.32	14.14	0.2	0.17	0.02	1.71	0.02
Tg0413	101109	115648	MSTRG.18619.1	+	14539	8	Palmitoyltransferase ZDHHC15	AgB24_g004_t05,AgB24_g004_t05,AgB24_g004_t05	PgE185_g001_t04,PgE185_g001_t04,PgE185_g001_t04	36.64	18.81	0.06	0.02	0.01	1.67	0.01
Tg0413	101808	106358	MSTRG.18620.3	-	4550	3	hypothetical protein			4.07	0.96	0.24	0.19	0	0	0.05
Tg0413	124784	135493	MSTRG.18621.7	+	10709	7	homeobox protein ceh-18	AgE18_g002_t01,AgE71_g001_t02	PgE178_g001_t01,PgE146_g002_t01	11.61	21.13	9.69	4.48	0.06	1.7	0.88
Tg0413	120999	123732	MSTRG.18622.1	-	2733	3	hypothetical protein			1	1.38	2.12	1.22	0.01	0.08	0.11
Tg0413	136970	141280	MSTRG.18623.4	-	4310	4	ubiquitin-conjugating enzyme e2 2		PgE033_g001_t05,PgE033_g001_t05	0.66	2.09	1.47	0.43	0.08	0.13	0.17
Tg0413	141861	144069	MSTRG.18624.1	+	2208	2	hypothetical protein			2.04	5.04	7.44	4.56	1.78	1.31	1.23
Tg0413	149070	151103	MSTRG.18625.1	+	2033	2	hypothetical protein			0.78	0.36	0.59	0.11	0.01	0.06	0.02
Tg0413	151639	183653	MSTRG.18626.6	+	32014	13	hypothetical protein	AgB07_g006_t01,AgB07_g006_t01,AgE12_g005_t01,AgE01_g029_t01,AgE01_g029_t01,AgB11_g003_t03,AgB07_g005_t01,AgB07_g005_t01,AgE23_g010_t01,AgE05_g028_t01,AgB11_g002_t01	PgE295_g001_t02,PgE295_g001_t02,PgE296_g002_t01,PgE011_g005_t01,PgE078_g003_t01,PgE059_g004_t01	3.47	11.06	6.85	3.69	0.37	0.92	1.08
Tg0413	187383	191279	MSTRG.18627.2	+	3896	2	hypothetical protein			0.28	0.85	0.98	0.45	0.05	0.08	0.13
Tg0413	192163	194414	MSTRG.18628.2	-	2251	3	hypothetical protein			0.16	0.32	0.08	0	0	0.03	0
Tg0413	194979	200707	MSTRG.18629.1	+	5728	4	hypothetical protein			0.46	0.4	0.21	0.14	0.03	0.03	0.03
Tg0413	203588	206173	MSTRG.18630.1	-	2585	3	hypothetical protein	AgB23_g078_t01	PgE236_g002_t01	3.31	3.3	0	0	0	0.27	0
Tg0413	206373	210987	MSTRG.18631.1	-	4614	2	hypothetical protein			0.08	0.23	0.01	0	0	0.02	0
Tg0419	8977	17962	MSTRG.18742.2	-	8985	11	hypothetical protein	AgE52_g002_t02,AgE41_g003_t06	PgB33_g008_t02	396.94	122.47	5.22	2.96	0.07	10.85	0.44
Tg0419	19508	88339	MSTRG.18743.1	-	68831	44	Actin-binding protein anillin			3.09	19.49	19.39	9.66	0.18	1.61	2.09
Tg0419	77455	80778	MSTRG.18744.1	+	3323	2	hypothetical protein			0.18	2.57	3.02	0.92	0.01	0.21	0.2
Tg0419	98764	119675	MSTRG.18745.11	+	20911	12	DAZ protein 1	AgE15_g007_t03,AgB29_g019_t07	PgE407_g001_t02,PgE367_g001_t02,PgE195_g002_t01	4.38	24.58	28.23	14.52	0.04	1.74	3.44
Tg0419	124095	127706	MSTRG.18746.1	+	3611	2	hypothetical protein			0.29	4.58	0.76	0.24	0	0.49	0.08
Tg0419	124095	127058	MSTRG.18747.1	-	2963	2	hypothetical protein			4.42	8.27	7.83	2.72	0.07	0.41	0.64
Tg0419	127424	132099	MSTRG.18748.3	-	4675	7	serine arginine-rich splicing factor 5	AgE06_g003_t03,AgE06_g003_t03,AgE24_g005_t03,AgB29_g018_t03	PgE021_g006_t03,PgE021_g006_t03,PgE135_g001_t01	18.91	46.03	19.98	8.76	0.02	3.08	2.03
Tg0419	136120	137619	MSTRG.18749.1	+	1499	2	hypothetical protein			0.02	0	0.28	0	0	0	0.04
Tg0419	141051	149163	MSTRG.18751.1	+	8112	6	Ubiquitin-conjugating enzyme E2 7, partial	AgE13_g010_t02,AgE02_g008_t05,AgE71_g002_t01,AgB17_g102_t01,AgE06_g010_t01,AgE01_g010_t01,AgE11_g008_t06	PgE109_g003_t01,PgE109_g002_t01,PgE111_g001_t01,PgE030_g001_t02	82.48	22.95	0.18	0.15	0.06	2.47	0.03
Tg0419	145487	151909	MSTRG.18752.3	-	6422	4	Ubiquitin-conjugating enzyme E2 7, partial	AgE13_g010_t02,AgE71_g002_t01		9.8	6.85	0.21	0.3	0	0.47	0
Tg0419	157722	177487	MSTRG.18753.1	-	19765	14	Tau-tubulin kinase 2	AgE57_g001_t04,AgB21_g003_t02,AgB33_g007_t02,AgE06_g006_t01,AgE05_g002_t01,AgE22_g012_t05,AgB26_g001_t02,AgE26_g003_t02,AgE01_g016_t01,AgB14_g003_t05,AgE03_g039_t02	PgE232_g001_t04,PgB10_g103_t01,PgE078_g001_t01,PgB25_g018_t01,PgE021_g005_t04,PgB22_g041_t04,PgE397_g001_t01,PgE149_g003_t02,PgE156_g001_t11,PgE111_g002_t03	298.12	104.39	0.2	0.28	0.01	11.49	0.03
Tg0419	160161	161353	MSTRG.18754.1	+	1192	2	hypothetical protein			0	0.09	0.12	0	0.99	0	0
Tg0419	165992	168337	MSTRG.18755.1	+	2345	2	hypothetical protein	AgE01_g041_t02		2.05	2.13	0.24	3.28	0.39	0.75	0.4
Tg0419	185009	190715	MSTRG.18757.1	+	5706	2	cytoplasmic polyadenylation element-binding protein 3		PgE144_g001_t01	0.08	0.35	2.3	0.73	0.02	0.08	0.21
Tg0419	185741	206268	MSTRG.18758.3	-	20527	11	Cytoplasmic polyadenylation element-binding protein 3	AgE11_g010_t05,AgE11_g010_t05,AgE14_g010_t04,AgE14_g010_t04,AgE14_g010_t04,AgB28X_g021_t03,AgB28X_g021_t03,AgB28X_g021_t03,AgB14_g002_t10,AgB14_g002_t10	PgE096_g001_t04,PgE096_g001_t04,PgE203_g001_t02,PgE203_g001_t02,PgB41X_g004_t04,PgB41X_g004_t04	0.56	2.05	14.82	7.15	0	0.19	1.75
Tg0424	43883	52488	MSTRG.18835.3	+	8605	8	Tyrosine-protein phosphatase non-receptor type 6	AgE28_g004_t01,AgB20_g013_t01,AgE02_g002_t03,AgE28_g001_t01	PgE293_g001_t01,PgE229_g002_t04,PgE029_g001_t02,PgE020_g001_t04	16.04	12.14	2.72	1.48	0.3	1.21	0.16
Tg0424	56918	76210	MSTRG.18836.1	-	19292	17	MOG interacting and ectopic P-granules protein 1	AgB19_g001_t04,AgE76_g001_t11	PgE403_g001_t01	6.34	15.17	25.99	13.54	0.08	1.24	2.57
Tg0424	79038	92834	MSTRG.18838.3	+	13796	9	Polyadenylate-binding protein 1	AgE04_g024_t03,AgE04_g024_t03,AgB28X_g014_t01,AgE24_g005_t03,AgE15_g007_t03,AgE15_g007_t03	PgE407_g001_t02,PgE407_g001_t02	14.64	28.85	7.96	3.91	0.12	2.29	0.77
Tg0424	101179	187281	MSTRG.18839.5	+	86102	68	60s ribosomal protein l17	AgE21_g001_t08	PgE218_g001_t02,PgE013_g002_t04,PgE013_g002_t04,PgE013_g002_t04,PgE321_g001_t02,PgE124_g001_t15	5.44	9.85	0.89	0.54	0.02	0.8	0.14
Tg0424	188242	193934	MSTRG.18840.1	+	5692	5	Serine/threonine-protein phosphatase PP1, partial	AgE12_g002_t11,AgE12_g002_t11,AgE01_g035_t04,AgE01_g035_t04,AgE09_g002_t06,AgE07_g011_t02,AgE03_g028_t02,AgB29_g017_t04	PgE094_g001_t03,PgE094_g001_t03,PgE215_g001_t01,PgE043_g004_t02,PgE056_g002_t02	0.27	0.47	0.16	0.09	0	0.01	0.01
Tg0424	196598	200198	MSTRG.18841.1	+	3600	5	Serine/threonine-protein phosphatase PP1, partial	AgE12_g002_t11	PgE094_g001_t03	262.44	106.91	0.43	0.17	0.09	9.46	0.05
Tg0424	198647	205078	MSTRG.18842.1	-	6431	6	hypothetical protein		PgE147_g001_t10	0.72	0.72	6.18	6.3	0.25	0.07	0.24
Tg0432	184539	187152	MSTRG.18965.1	-	2613	2	hypothetical protein			2.57	0.18	0.04	0.04	1.15	0.19	0
Tg0432	195335	200866	MSTRG.18966.1	+	5531	3	hypothetical protein			1.31	0.37	0	0	0.07	0	0
Tg0435	193284	197203	MSTRG.19027.1	-	3919	4	Repetitive proline-rich cell wall protein 1			0.56	0.21	0	0	0	0.02	0
Tg0444	1433	20151	MSTRG.19160.8	+	18718	17	Protein MOR1			17.75	10.9	1.65	1.01	0.04	1.11	0.26
Tg0446	4499	16679	MSTRG.19188.6	+	12180	6	hypothetical protein			1.78	12.78	21.41	12.76	0.26	0.98	1.77
Tg0446	17790	19449	MSTRG.19189.2	-	1659	2	hypothetical protein			0.64	5.09	6.99	3.46	0.17	0.32	0.67
Tg0446	20212	43249	MSTRG.19190.1	+	23037	13	Excitatory amino acid transporter	AgE04_g019_t01,AgB04_g462_t03	PgE048_g002_t02,PgB17_g069_t01,PgE302_g001_t01,PgE465_g001_t02	37.53	14.99	0.27	0.1	0.02	1.49	0.02
Tg0446	40488	56167	MSTRG.19191.3	-	15679	4	N-alpha-acetyltransferase 11			1.94	6.88	6.06	3.02	0.05	0.6	0.54
Tg0446	46831	97135	MSTRG.19192.1	+	50304	14	RNA-binding protein 12B			1.82	9.28	5.61	2.99	0.1	0.73	0.61
Tg0446	97222	100553	MSTRG.19193.1	+	3331	2	hypothetical protein			0.65	3.75	2.74	1.47	0.11	0.22	0.34
Tg0446	103025	107341	MSTRG.19194.1	-	4316	2	hypothetical protein			51.28	14.95	0.18	0.03	0.02	1.14	0
Tg0446	106832	112806	MSTRG.19195.1	+	5974	7	homeobox protein ceh-18	AgE18_g002_t01,AgE18_g002_t01,AgE71_g001_t02	PgE178_g001_t01,PgE178_g001_t01,PgE178_g001_t01,PgE146_g002_t01,PgE146_g002_t01	5.85	6.65	1.5	0.8	0.16	0.42	0.07
Tg0446	107589	108887	MSTRG.19196.1	-	1298	2	hypothetical protein			1.79	1.66	0	0	0	0	0
Tg0446	114576	124956	MSTRG.19197.3	-	10380	8	ubiquitin-conjugating enzyme e2 2		PgE033_g001_t05	3.48	17.52	24.04	10.63	0.24	1.45	1.54
Tg0446	137142	145212	MSTRG.19200.2	-	8070	8	protein ariadne-1	AgE35_g006_t02	PgE036_g002_t02,PgE090_g002_t01,PgE090_g001_t01	42.26	42.14	28.27	13.15	0.24	3.86	2.85
Tg0446	156390	177375	MSTRG.19202.4	+	20985	16	hypothetical protein			13.98	16.38	14.1	6.62	0.05	1.56	1.38
Tg0446	180831	188906	MSTRG.19203.1	-	8075	2	hypothetical protein			0	0.05	0	0	0	0	0
Tg0446	191032	192364	MSTRG.19204.2	-	1332	2	hypothetical protein			1.44	0.74	0	0	0	0.04	0
Tg0455	101	2368	MSTRG.19345.2	-	2267	3	dna-directed rna polymerase ii subunit rpb9	AgE10_g001_t02	PgE169_g001_t04	0.05	0.3	1.94	0.93	0.06	0.02	0.13
Tg0455	23160	52219	MSTRG.19347.2	+	29059	22	tudor domain containing protein	AgE01_g033_t01,AgE01_g033_t01,AgB22X_g003_t04	PgE001_g007_t01,PgE002_g001_t01	0.93	3.51	6.35	2.93	0.03	0.28	0.81
Tg0470	542	3334	MSTRG.19565.1	+	2792	4	Uncharacterized protein C4.03c			145.47	63.21	107.61	51.91	0.02	6.08	8.08
Tg0470	10574	13910	MSTRG.19566.1	+	3336	2	hypothetical protein			12.33	1.6	0.3	0.15	0	0.07	0.03
Tg0470	11557	20276	MSTRG.19567.1	-	8719	5	pdz domain containing protein	AgE24_g008_t03	PgE068_g004_t02	23.17	18.64	0.95	0.52	0.01	1.42	0.04
Tg0470	23368	27144	MSTRG.19568.1	+	3776	3	hypothetical protein			0.13	0.49	1.22	1.34	0	0.02	0.17
Tg0470	30238	44733	MSTRG.19570.3	-	14495	10	Dolichyl-diphosphooligosaccharide--protein glycosyltransferase 48 kDa subunit			63.17	122.45	40.37	19.01	0.07	9.32	5.45
Tg0470	53125	58384	MSTRG.19571.4	+	5259	4	hypothetical protein			12.74	51.41	73.06	35.87	0.14	3.14	6.54
Tg0470	56691	57405	MSTRG.19572.1	-	714	2	hypothetical protein			1.3	0.54	0.16	0	0	0	0
Tg0470	70834	84012	MSTRG.19573.8	+	13178	9	Tyrosine-protein kinase kin-31	AgE04_g029_t08,AgE04_g029_t08,AgE03_g022_t01,AgE03_g022_t01,AgE03_g026_t04,AgE03_g026_t04,AgE02_g027_t05,AgB34_g005_t05,AgE12_g003_t14,AgE04_g018_t07,AgB29_g016_t02,AgE63_g004_t06	PgE002_g006_t01,PgE001_g002_t01,PgE056_g003_t06,PgE056_g003_t06,PgE063_g004_t02,PgE063_g004_t02,PgE088_g002_t01,PgB37_g005_t03,PgB25_g019_t01,PgE277_g001_t02,PgE277_g001_t02,PgE080_g003_t01	26.06	25.34	0.29	0.17	0.04	2.2	0.04
Tg0470	66845	69304	MSTRG.19574.1	-	2459	2	hypothetical protein			0.42	0.5	0.89	0.38	0	0.04	0.03
Tg0470	85324	89925	MSTRG.19575.1	+	4601	3	hypothetical protein			0.4	0.64	0.16	0.07	0	0.06	0.01
Tg0470	90500	109256	MSTRG.19576.7	+	18756	11	Vacuolar protein sorting-associated protein 4			1.77	5.54	6.72	3.29	0.02	0.52	0.49
Tg0470	100925	104547	MSTRG.19578.1	-	3622	2	hypothetical protein			18.02	5.77	0.18	0.13	0	0.6	0.04
Tg0470	104872	106561	MSTRG.19579.1	+	1689	2	hypothetical protein			0.06	0.14	1.39	0.48	0	0	0.08
Tg0470	126204	135999	MSTRG.19582.1	+	9795	5	LDLR chaperone MESD			22.56	20.92	1.36	0.53	0.02	1.59	0.12
Tg0470	130481	146125	MSTRG.19583.3	-	15644	8	pdz domain containing protein	AgE24_g008_t03	PgE068_g004_t02	13.79	15.96	0.35	0.14	0.01	1.2	0.03
Tg0470	138442	140500	MSTRG.19584.1	+	2058	2	pdz domain containing protein		PgE068_g004_t02	9.98	27.84	1.61	1.32	0	2.35	0
Tg0470	149432	150619	MSTRG.19585.1	-	1187	2	hypothetical protein			2.56	2.8	0	0	0	0	0
Tg0470	152379	157679	MSTRG.19586.8	+	5300	7	Female germline-specific tumor suppressor gld-1	AgE20_g005_t01,AgE20_g005_t01,AgE20_g005_t01	PgE125_g001_t01,PgE125_g001_t01,PgE125_g001_t01	5.98	19.98	33.16	16.88	0.01	1.34	3.08
Tg0470	155485	155755	MSTRG.19587.1	-	270	2	hypothetical protein			0	0.89	0.73	0	0	0.35	0
Tg0470	159447	170747	MSTRG.19589.1	-	11300	8	Serine/threonine-protein kinase	AgE05_g002_t01,AgE06_g006_t01,AgB21_g003_t02,AgE26_g003_t02,AgB33_g007_t02,AgB26_g001_t02,AgE57_g001_t04,AgE01_g016_t01,AgE03_g039_t02,AgE22_g012_t05	PgE078_g001_t01,PgB10_g103_t01,PgB25_g018_t01,PgB22_g041_t04,PgE232_g001_t04,PgE021_g005_t04,PgE149_g003_t02,PgE111_g002_t03,PgE498_g001_t01,PgE156_g001_t11,PgE397_g001_t01	1.19	0.49	0	0	0	0.01	0
Tg0470	162125	163479	MSTRG.19590.1	+	1354	3	hypothetical protein			0	0.26	0	0	0	0	0
Tg0481	1797	3699	MSTRG.19724.1	+	1902	3	Protein ECT2		PgE016_g001_t01	49.91	31.04	0.09	0.27	0	3.19	0
Tg0481	4910	6267	MSTRG.19725.1	-	1357	2	Protein ECT2		PgE016_g001_t01	11.64	7.42	0.11	0.12	0	0.54	0.02
Tg0481	7950	24936	MSTRG.19727.1	+	16986	9	Protein UBASH3A	AgE08_g011_t02,AgE08_g021_t03,AgE09_g016_t01	PgE022_g005_t04	12.01	11.97	1.16	1.02	0.05	1.59	0.11
Tg0481	14900	21059	MSTRG.19728.1	-	6159	4	Protein UBASH3A	AgE08_g011_t02	PgE022_g005_t04	0.48	0.36	0.02	0.05	0	0.05	0.02
Tg0485	1517	4077	MSTRG.19774.2	-	2560	3	hypothetical protein			0.22	0.42	0.36	0.22	0	0.01	0.03
Tg0485	6733	22327	MSTRG.19775.1	+	15594	12	hypothetical protein			0.16	1.43	3.12	1.87	0.03	0.12	0.21
Tg0485	23326	39295	MSTRG.19776.5	+	15969	9	ATP-dependent RNA helicase cgh-1	AgB31X_g005_t01,AgB29_g002_t01	PgB09_g100_t03,PgE543_g001_t01,PgE228_g001_t01	2.96	7.57	29.94	12.38	0.08	0.58	3.18
Tg0485	32077	33257	MSTRG.19777.1	-	1180	2	ATP-dependent RNA helicase cgh-1	AgB31X_g005_t01,AgB31X_g005_t01,AgB29_g002_t01	PgB09_g100_t03,PgB09_g100_t03,PgE543_g001_t01,PgE543_g001_t01,PgE228_g001_t01,PgE228_g001_t01	0	0	0.61	0	0	0	0.61
Tg0485	45319	57165	MSTRG.19779.1	+	11846	9	Vesicle-associated membrane protein-associated protein B/C			18.67	22.15	14.06	6.81	0.19	1.92	1.34
Tg0485	55770	65513	MSTRG.19780.1	-	9743	5	hypothetical protein			47.82	21.83	0.59	0.35	0	2.22	0.02
Tg0485	62969	65513	MSTRG.19781.1	+	2544	2	hypothetical protein			16.15	7.64	0.11	0.17	0.03	0.87	0.01
Tg0485	68407	77970	MSTRG.19782.1	+	9563	6	hypothetical protein	AgE05_g024_t06	PgE044_g002_t02	3.59	16.64	36.71	16.65	0.07	1.18	3.53
Tg0485	80964	86185	MSTRG.19783.6	-	5221	3	hypothetical protein	AgE07_g001_t02		6.57	6.73	0.88	0.34	0	0.5	0.06
Tg0485	96426	99576	MSTRG.19784.1	+	3150	2	hypothetical protein	AgE02_g019_t02		1.63	2.61	0.01	0.01	0	0.22	0
Tg0485	119002	130278	MSTRG.19786.1	+	11276	11	hypothetical protein			49.46	17.28	0.04	0.05	0	1.38	0.01
Tg0485	133882	161053	MSTRG.19787.1	-	27171	16	Major sperm protein isoform beta	AgE02_g037_t01,AgE02_g015_t02,AgE02_g017_t01,AgE02_g013_t06	PgE404_g001_t01,PgE404_g002_t01,PgE130_g001_t02	3.75	13.68	7.24	3.12	0.04	1	0.97
Tg0485	154076	161054	MSTRG.19788.1	+	6978	3	Major sperm protein isoform beta	AgE02_g017_t01,AgE02_g017_t01,AgE02_g015_t02,AgE02_g015_t02,AgE02_g037_t01,AgE02_g037_t01,AgE02_g016_t01	PgE404_g001_t01,PgE404_g001_t01,PgE404_g002_t01,PgE404_g002_t01	1967.09	376.69	1.76	0.94	0.17	21.21	0.12
Tg0485	165610	166743	MSTRG.19790.1	+	1133	2	hypothetical protein			0.73	0.59	0.32	0.23	0.31	0.04	0.11
Tg0495	1225	20833	MSTRG.19919.2	+	19608	15	CAP-Gly domain-containing linker protein 1 homolog			32.1	89.58	101.19	56.99	0.28	6.58	10.74
Tg0495	24348	26451	MSTRG.19920.1	+	2103	2	myosin-7	AgE02_g029_t02,AgE02_g029_t02		0.19	1.33	1.08	0.76	0	0.05	0.15
Tg0495	30848	40676	MSTRG.19922.1	+	9828	11	Nose resistant to fluoxetine protein 6	AgE13_g005_t05	PgE362_g001_t01,PgE022_g002_t06,PgE478_g001_t01	1.66	7.61	27.7	11.96	0	0.62	3.38
Tg0495	47526	67754	MSTRG.19925.1	+	20228	14	hypothetical protein			0.08	0.44	2.18	1.45	0.01	0.02	0.3
Tg0495	71124	75398	MSTRG.19928.1	+	4274	3	hypothetical protein			1.49	4.9	7.04	2.43	0	0.3	0.48
Tg0495	72436	81097	MSTRG.19929.1	-	8661	8	Transcriptional activator protein Pur-beta-A			5.84	22.29	14.15	6.19	0.04	1.77	1.66
Tg0495	81150	82175	MSTRG.19930.1	+	1025	2	hypothetical protein			0.03	0.11	0.33	0.26	0.04	0	0.06
Tg0495	81744	91576	MSTRG.19931.1	-	9832	2	hypothetical protein			0.12	1.55	1.23	0.98	1.27	0.76	0.15
Tg0498	396	18737	MSTRG.19963.1	+	18341	16	Cationic amino acid transporter 2			0.7	1.49	9.65	5.73	12.94	1.35	1.55
Tg0501	3392	31243	MSTRG.19994.2	-	27851	21	Tyrosine-protein kinase Fps85D	AgE02_g027_t05,AgE02_g027_t05,AgE12_g003_t14,AgE12_g003_t14,AgE03_g026_t04,AgE03_g026_t04,AgE04_g018_t07,AgE04_g018_t07,AgE03_g022_t01,AgE03_g022_t01,AgE01_g014_t01,AgE01_g014_t01,AgE01_g014_t01,AgB34_g005_t05,AgB34_g005_t05,AgB29_g016_t02,AgB29_g016_t02,AgE31_g003_t01,AgE31_g003_t01,AgB33_g008_t01,AgE04_g029_t08,AgE63_g004_t06	PgE014_g001_t07,PgE014_g001_t07,PgE007_g001_t01,PgE007_g001_t01,PgE007_g001_t01,PgE274_g001_t02,PgE274_g001_t02,PgE274_g001_t02,PgE459_g001_t02,PgE459_g001_t02,PgE056_g003_t06,PgE056_g003_t06,PgB37_g005_t03,PgB37_g005_t03,PgE088_g002_t01,PgE088_g002_t01,PgE277_g001_t02,PgE277_g001_t02,PgB25_g019_t01,PgB25_g019_t01,PgE063_g004_t02,PgE063_g004_t02,PgE040_g001_t07,PgE040_g001_t07,PgE153_g002_t01,PgE…	55.99	21.45	0.08	0.06	0.01	2.38	0
Tg0501	36169	38576	MSTRG.19995.1	-	2407	3	hypothetical protein			0.06	0.05	0.16	0.16	0	0	0
Tg0501	36483	37665	MSTRG.19996.1	+	1182	2	Phosphatidylinositol 4-kinase type 2-alpha			8.64	4.16	0.19	0	0.04	0.45	0
Tg0501	40270	45568	MSTRG.19997.1	-	5298	5	hypothetical protein			2.32	16.85	12.58	4.9	0.72	1.31	1.07
Tg0501	49163	54179	MSTRG.19999.3	+	5016	2	hypothetical protein			0.25	0.98	0.42	0.16	0.14	0.05	0.03
Tg0501	49166	50791	MSTRG.20000.1	-	1625	3	hypothetical protein			0.12	0.25	0	0	0	0	0
Tg0501	56650	80981	MSTRG.20001.2	+	24331	16	hypothetical protein	AgE02_g010_t02,AgE05_g005_t04,AgE59_g001_t09,AgE05_g006_t01	PgE103_g005_t02,PgE172_g002_t03,PgE341_g001_t01,PgE242_g001_t05	30.25	41.96	0.44	0.27	0.02	3.65	0.04
Tg0501	64119	66647	MSTRG.20002.1	-	2528	2	hypothetical protein			0.7	1.92	0.39	0.13	0.05	0.21	0.01
Tg0501	85807	88080	MSTRG.20003.1	+	2273	2	hypothetical protein			0.31	1.23	0.05	0.07	0	0.03	0
Tg0501	90298	104394	MSTRG.20004.1	+	14096	7	hypothetical protein	AgE05_g015_t02	PgE141_g001_t01	79.15	27.79	0.04	0.04	0.02	3.05	0
Tg0501	111069	111755	MSTRG.20006.1	-	686	2	hypothetical protein			0.73	0.38	0.16	0.15	0.38	0.03	0
Tg0501	111808	120989	MSTRG.20007.1	+	9181	6	hypothetical protein	AgE02_g041_t03	PgE084_g002_t03	7.82	1.93	0.04	0.02	0.14	0.29	0.02
Tg0501	121088	131394	MSTRG.20008.1	+	10306	4	hypothetical protein		PgE084_g002_t03	6.8	3.27	0	0	0.23	0.17	0
Tg0501	133188	138748	MSTRG.20010.1	-	5560	8	Tyrosine-protein phosphatase non-receptor type 9	AgB20_g013_t01,AgE28_g004_t01,AgE02_g002_t03,AgE28_g001_t01,AgE09_g001_t01	PgE229_g002_t04,PgE293_g001_t01,PgE029_g001_t02,PgE020_g001_t04	21.95	9.03	0.02	0.01	0	0.87	0
Tg0501	142477	143480	MSTRG.20011.3	+	1003	2	Major sperm protein isoform beta	AgE02_g017_t01,AgE02_g017_t01,AgE02_g015_t02,AgE02_g015_t02,AgE02_g037_t01,AgE02_g037_t01	PgE404_g001_t01,PgE404_g001_t01,PgE404_g002_t01,PgE404_g002_t01	303.48	47.01	0.85	0.61	0.35	2.31	0.02
Tg0501	150613	152659	MSTRG.20013.1	-	2046	3	Glutamate dehydrogenase 1, mitochondrial			175.82	51.41	0.22	0.19	0.08	4.37	0.04
Tg0504	2772	5201	MSTRG.20043.1	-	2429	2	hypothetical protein			0.13	0.27	0.04	0.04	0	0.01	0.01
Tg0504	6286	16941	MSTRG.20044.1	+	10655	7	protein lsm14-like protein b	AgE02_g022_t01	PgE009_g001_t04,PgE308_g001_t01	0.83	3.93	13.2	5.93	0.01	0.32	1.5
Tg0504	20732	26688	MSTRG.20045.5	+	5956	6	Sperm vesicle fusion protein fer-1		PgE022_g007_t01	67.85	37.45	0.55	0.32	0	3.42	0.06
Tg0504	23023	33914	MSTRG.20046.1	-	10891	4	Tubulin alpha-2 chain	AgE01_g014_t01	PgE459_g001_t02,PgE274_g001_t02,PgE007_g001_t01,PgE261_g001_t01,PgE040_g001_t07	3.12	3.75	0.79	0.39	0.02	0.3	0.05
Tg0504	30923	41017	MSTRG.20047.2	+	10094	3	hypothetical protein			1.32	1.26	0.21	0.14	0.02	0.17	0.03
Tg0504	32260	39363	MSTRG.20048.1	-	7103	2	hypothetical protein			2.32	1.87	0.11	0.04	0	0.15	0.06
Tg0504	37503	39396	MSTRG.20049.1	+	1893	2	hypothetical protein			0.08	0.17	0.93	0.38	0.05	0.03	0.06
Tg0504	41299	60187	MSTRG.20050.3	-	18888	11	hypothetical protein			8.75	4.25	0.02	0.02	0	0.46	0.01
Tg0504	58713	63093	MSTRG.20051.1	+	4380	3	hypothetical protein			12.77	6.81	0.54	0.22	0.02	0.67	0.04
Tg0504	61040	74435	MSTRG.20052.1	+	13395	10	hypothetical protein			114.2	64.23	0.16	0.1	0.06	6.15	0.01
Tg0504	81846	85761	MSTRG.20055.1	-	3915	2	hypothetical protein			0.42	0.1	0.04	0.05	0	0	0
Tg0504	85895	111668	MSTRG.20056.4	+	25773	23	hypothetical protein	AgB01_g831_t04	PgE083_g002_t03,PgE282_g001_t02	275.3	132.83	1.29	0.82	0.15	13.57	0.13
Tg0504	109303	111668	MSTRG.20057.1	-	2365	2	hypothetical protein		PgE282_g001_t02	1.39	0.54	0.04	0.03	0	0.03	0
Tg0504	119053	120869	MSTRG.20058.1	+	1816	3	hypothetical protein			1.02	0.88	0	0	0	0.09	0
Tg0504	125682	131495	MSTRG.20059.1	+	5813	7	Serine/threonine-protein kinase	AgB26_g001_t02,AgE26_g003_t02,AgE01_g016_t01,AgB33_g007_t02,AgE06_g006_t01,AgB21_g003_t02,AgB29_g020_t02,AgE05_g002_t01,AgE57_g001_t04,AgB14_g003_t05,AgE03_g039_t02,AgE17_g009_t02,AgE47_g003_t06	PgB22_g041_t04,PgB25_g018_t01,PgE078_g001_t01,PgB10_g103_t01,PgE021_g005_t04,PgE149_g003_t02,PgE232_g001_t04,PgE156_g001_t11,PgE111_g002_t03,PgE034_g004_t01,PgE059_g007_t01,PgB02X_g220_t02	75.61	71	1.44	0.78	0.02	5.83	0.22
Tg0504	134162	150547	MSTRG.20060.1	+	16385	18	LINE-1 reverse transcriptase	AgE08_g021_t03		26.19	15.38	0.01	0.01	0.01	1.81	0.01
Tg0511	132940	139817	MSTRG.20162.1	+	6877	5	GDP-D-glucose phosphorylase 1			0	0	0.49	0.26	0.2	0.01	0.02
Tg0511	139181	143973	MSTRG.20164.1	-	4792	6	pdz domain containing protein	AgE24_g008_t03	PgE068_g004_t02	26.99	8.93	0.1	0.05	0.04	0.83	0.02
Tg0512	5	17688	MSTRG.20165.1	-	17683	13	Branched-chain-amino-acid aminotransferase, partial	AgE25_g003_t04	PgB36X_g004_t03	1001.22	222.08	0.6	0.4	0.08	18.88	0.06
Tg0512	17516	19767	MSTRG.20166.1	+	2251	3	hypothetical protein			1.35	0.65	0.26	0.09	0	0.02	0
Tg0512	20556	34626	MSTRG.20167.5	+	14070	6	hypothetical protein			29.81	17.44	0.24	0.05	0.02	1.75	0.01
Tg0512	22935	28069	MSTRG.20168.1	-	5134	2	hypothetical protein			2.06	1.03	0.46	0.14	0	0.08	0.01
Tg0512	35203	94285	MSTRG.20169.1	-	59082	58	Vacuolar protein sorting-associated protein 13A (Fragment)			6.46	8.22	4.03	1.91	0.15	0.77	0.37
Tg0512	94128	95414	MSTRG.20171.1	+	1286	2	Vacuolar protein sorting-associated protein 13A			0.91	1.54	0.27	0.23	0	0.31	0.11
Tg0512	95164	98045	MSTRG.20172.1	-	2881	3	Vacuolar protein sorting-associated protein 13			0.44	1.12	0.03	0.17	0	0.15	0.06
Tg0512	98663	100397	MSTRG.20173.1	-	1734	3	hypothetical protein	AgE02_g009_t05,AgE02_g009_t05		0.19	0.16	0	0.02	0	0	0
Tg0512	109434	115482	MSTRG.20175.1	-	6048	5	hypothetical protein	AgB29_g011_t02	PgE026_g001_t10	146.77	63.54	0.07	0.17	0	6.06	0.03
Tg0512	117599	137860	MSTRG.20176.3	+	20261	12	KH domain-containing protein	AgE29_g001_t18,AgE29_g001_t18,AgE29_g001_t18,AgE17_g004_t04		2.58	7.98	3.57	1.93	0.02	0.72	0.44
Tg0512	139597	142692	MSTRG.20177.2	+	3095	2	hypothetical protein			1.27	7.82	2.24	0.87	0.07	0.68	0.2
Tg0513	1070	5135	MSTRG.20179.1	-	4065	2	hypothetical protein			1.19	0.94	0.52	0.29	0	0.08	0.02
Tg0513	5240	47978	MSTRG.20180.1	+	42738	40	DNA-directed RNA polymerase II subunit RPB1	AgB03_g007_t04	PgE049_g001_t01	8.87	22.63	4.24	2.02	0.05	1.57	0.62
Tg0513	37369	37866	MSTRG.20181.3	-	497	2	DNA-directed RNA polymerase II subunit RPB1	AgB03_g007_t04	PgE049_g001_t01	10.14	7.93	3.56	1.83	0	0.68	0.24
Tg0513	77732	79141	MSTRG.20182.1	-	1409	3	hypothetical protein			0	0.58	0.07	0.07	0	0.07	0
Tg0513	78970	86111	MSTRG.20183.3	+	7141	6	hypothetical protein	AgE05_g003_t02	PgE149_g004_t01	4.75	15.22	11.55	5.53	0.12	1.26	1.33
Tg0513	89446	90355	MSTRG.20184.1	-	909	2	hypothetical protein			0.08	0.72	0.61	0.76	0	0	0.08
Tg0513	94126	105136	MSTRG.20186.1	+	11010	6	hypothetical protein			0.61	2.37	9.23	3.82	0.05	0.19	0.83
Tg0513	105202	129472	MSTRG.20187.3	-	24270	21	nuclear receptor-binding protein	AgE29_g002_t02,AgB29_g016_t02,AgB34_g005_t05,AgE02_g027_t05	PgE035_g002_t08,PgE175_g001_t01,PgE088_g002_t01,PgB25_g019_t01	6.81	26.87	63.37	31.75	0.13	2.01	7.01
Tg0513	133151	135835	MSTRG.20188.2	+	2684	2	hypothetical protein			0.15	0.55	0.25	0.09	0	0.08	0
Tg0513	130990	133664	MSTRG.20189.1	-	2674	2	E3 ubiquitin-protein ligase TRIP12			0.56	2.62	3.5	1.43	0.02	0.17	0.24
Tg0522	47633	54055	MSTRG.20288.2	+	6422	8	hypothetical protein			20.02	11.64	0.1	0.08	0.13	1.08	0.02
Tg0522	51312	56525	MSTRG.20289.1	-	5213	4	hypothetical protein			0.27	0.34	0	0	0.09	0	0
Tg0527	44130	59246	MSTRG.20341.1	-	15116	5	Calcyphosin			4.86	10.6	3.69	15.11	37.98	54.12	44.75
Tg0527	122830	124851	MSTRG.20352.1	-	2021	2	hypothetical protein			0.74	0.04	0	0	0	0.01	0
Tg0527	125169	133323	MSTRG.20353.1	-	8154	8	Tau-tubulin kinase 1	AgB21_g003_t02,AgE05_g002_t01,AgE06_g006_t01,AgB33_g007_t02,AgB26_g001_t02,AgE26_g003_t02,AgE01_g016_t01,AgE57_g001_t04,AgE03_g039_t02,AgE22_g012_t05	PgB10_g103_t01,PgE078_g001_t01,PgB25_g018_t01,PgB22_g041_t04,PgE021_g005_t04,PgE149_g003_t02,PgE232_g001_t04,PgE156_g001_t11,PgE498_g001_t01,PgE111_g002_t03,PgE397_g001_t01,PgE059_g007_t01	11.77	5.38	0.02	0	0	0.66	0
Tg0532	3403	28689	MSTRG.20404.1	+	25286	18	hypothetical protein			2.03	8.95	20.82	10.07	0.03	0.6	2.05
Tg0532	28858	37605	MSTRG.20405.2	-	8747	6	Protein FAM69C	AgE50_g003_t03,AgE50_g003_t03	PgE042_g005_t01,PgE042_g005_t01	1.45	1.62	0.97	0.26	0	0.11	0.05
Tg0532	38806	45718	MSTRG.20406.1	+	6912	8	Sperm-specific class P protein 32	AgE01_g006_t02		649.98	187.98	12.26	6.3	0.12	17.97	1.44
Tg0532	42147	45718	MSTRG.20407.1	-	3571	3	hypothetical protein			0.41	0.28	0	0	0	0.02	0
Tg0532	50111	52362	MSTRG.20408.1	+	2251	2	hypothetical protein			0.52	2.3	0.19	0.15	0	0.15	0.07
Tg0532	52730	92649	MSTRG.20409.5	+	39919	26	Testis-specific serine/threonine-protein kinase 2	AgE23_g001_t01,AgE47_g003_t06,AgE17_g009_t02,AgE06_g013_t01,AgE16_g006_t02,AgE03_g026_t04,AgB33_g007_t02,AgB26_g001_t02,AgE04_g018_t07,AgE26_g003_t02,AgE06_g006_t01,AgB34_g005_t05,AgE02_g027_t05,AgE04_g034_t02,AgE12_g003_t14	PgE222_g001_t02,PgB37_g005_t03,PgE025_g001_t01,PgE028_g001_t03,PgB02X_g220_t02,PgE039_g003_t02,PgE056_g003_t06,PgB25_g018_t01,PgB25_g019_t01,PgE277_g001_t02,PgB22_g041_t04	0.73	6.95	0.66	0.41	0.02	0.46	0.09
Tg0532	96057	110176	MSTRG.20410.7	-	14119	13	metal transporter cnnm4	AgE07_g020_t04,AgE53_g004_t05,AgE53_g004_t05,AgE53_g004_t05,AgE53_g004_t05,AgE53_g004_t05	PgE100_g003_t03,PgE100_g003_t03,PgE100_g003_t03,PgE100_g003_t03,PgE100_g003_t03	7.15	8.13	0.02	0.03	0.01	0.57	0
Tg0534	145	3006	MSTRG.20430.1	-	2861	3	hypothetical protein			0.46	2.68	0.98	0.21	0.35	0.12	0.16
Tg0534	3424	5975	MSTRG.20431.1	+	2551	4	hypothetical protein		PgE021_g003_t01	95.4	41.94	1.57	0.63	0.23	4.27	0.18
Tg0534	16164	29062	MSTRG.20437.1	-	12898	11	Sperm vesicle fusion protein fer-1		PgE032_g001_t02	5.15	13.41	1.35	0.5	0.05	0.99	0.14
Tg0534	28001	30049	MSTRG.20438.1	+	2048	2	Myoferlin	AgE02_g034_t08	PgE089_g002_t08	2.76	11.64	0.58	0.22	0	1.21	0.04
Tg0534	29850	68512	MSTRG.20439.1	-	38662	33	Myoferlin	AgE02_g034_t08,AgE18_g007_t06,AgB20_g010_t01	PgE061_g001_t06,PgE089_g002_t08,PgE032_g002_t18,PgE432_g001_t01,PgE032_g003_t01	74.21	43.54	1.13	0.63	0.08	4.24	0.17
Tg0534	95162	105585	MSTRG.20440.9	+	10423	8	hypothetical protein			1.12	3.03	2.29	1.15	0.02	0.24	0.26
Tg0534	64885	71099	MSTRG.20441.2	+	6214	4	hypothetical protein			2.13	0.77	0	0	0	0.03	0
Tg0534	70402	79808	MSTRG.20442.1	-	9406	8	Homeobox protein ceh-18	AgE18_g002_t01	PgE146_g002_t01,PgE178_g001_t01	46.14	35.1	0.11	0.18	0.04	3.2	0.03
Tg0534	107392	109599	MSTRG.20443.1	-	2207	2	hypothetical protein			0.16	0.18	0.75	0.34	0.03	0.06	0.02
Tg0534	113471	118956	MSTRG.20445.1	+	5485	3	hypothetical protein			1088.06	125.5	0.63	0.36	0.08	8.73	0.04
Tg0534	125569	129506	MSTRG.20447.1	-	3937	4	hypothetical protein	AgE52_g002_t02,AgE52_g002_t02	PgB33_g008_t02,PgB33_g008_t02	0.74	0.35	0.15	0.01	0	0.04	0
Tg0534	129580	130850	MSTRG.20448.1	-	1270	2	hypothetical protein			0.34	0.39	0	0.04	0	0.93	0.27
Tg0534	130146	130866	MSTRG.20449.1	+	720	2	hypothetical protein			0.13	0.19	0	0	0	0.57	0.08
Tg0535	61280	69553	MSTRG.20454.6	-	8273	6	Calmodulin			2.16	3.54	4.72	3.54	6.43	3.65	2.71
Tg0535	37327	39998	MSTRG.20455.1	+	2671	2	Gamma-aminobutyric acid receptor subunit rho-2			0	0.71	0.22	0.44	4.03	0	0.11
Tg0535	39865	41268	MSTRG.20456.1	-	1403	2	hypothetical protein			0.18	0.8	0.69	0.89	11.38	0.02	0.05
Tg0538	90	7858	MSTRG.20488.1	+	7768	6	hypothetical protein			5.03	23.17	34.88	18.36	0.11	1.77	3.72
Tg0538	16266	35338	MSTRG.20489.4	+	19072	11	Transforming acid coiled-coil-containing protein 1			12.85	25.17	7.95	4.37	0.07	1.92	0.87
Tg0538	39239	73045	MSTRG.20490.2	+	33806	21	Condensin complex subunit 3	AgB03_g002_t07	PgE037_g001_t04	3.65	8.83	7.89	4.02	0.09	0.72	0.71
Tg0538	59749	73045	MSTRG.20491.8	-	13296	6	Condensin complex subunit 3		PgE037_g001_t04	11.29	4.44	0.21	0.11	0.03	0.37	0.02
Tg0538	73163	83220	MSTRG.20492.1	+	10057	10	Kelch-like protein 10	AgE51_g002_t01		3.51	2.87	635.26	275.56	0.07	1.69	61.65
Tg0538	85147	90347	MSTRG.20493.2	-	5200	4	kelch-like protein 10	AgB21_g001_t02,AgB21_g001_t02,AgE51_g001_t01,AgE51_g001_t01,AgE51_g001_t01,AgE51_g001_t01,AgB15X_g001_t02,AgB15X_g001_t02,AgB15X_g001_t02,AgB15X_g001_t02	PgE019_g002_t05,PgE019_g002_t05,PgE019_g002_t05,PgE019_g002_t05	0.09	0.17	1.28	0.59	0.66	0.02	0.28
Tg0538	82191	83342	MSTRG.20494.1	-	1151	2	hypothetical protein			0	0	0.11	0.11	0	0	0
Tg0538	99188	106314	MSTRG.20496.1	-	7126	7	hypothetical protein			15.22	11.24	0.01	0.03	0.01	1.18	0
Tg0538	106600	109973	MSTRG.20497.1	+	3373	4	Transposon-derived protein	AgE38_g003_t03,AgE22_g010_t01		57.73	43.24	0.01	0.02	0.03	3.81	0.01
Tg0538	113043	125480	MSTRG.20499.1	+	12437	13	Fem-3 mRNA-binding factor 2	AgE13_g013_t01,AgE23_g005_t02,AgE15_g013_t02	PgE134_g002_t01,PgE079_g002_t06,PgE134_g001_t01	8.25	18.44	10.93	5.84	0.22	1.68	1.27
Tg0538	120221	122019	MSTRG.20500.1	-	1798	3	Fem-3 mRNA-binding factor 2	AgE13_g013_t01,AgE13_g013_t01	PgE134_g001_t01,PgE134_g002_t01	0.47	0.09	0	0	0	0	0
Tg0538	125650	128425	MSTRG.20501.1	-	2775	2	hypothetical protein			0.04	0.22	0.34	0.16	0	0.03	0.01
Tg0539	112651	126149	MSTRG.20510.1	+	13498	9	RING finger protein 121			2.45	6.6	3.89	2.09	4.24	1.53	0.88
Tg0541	3067	11743	MSTRG.20519.1	+	8676	6	hypothetical protein			36.63	14.54	0.07	0.03	0.02	1.5	0.01
Tg0541	13419	28652	MSTRG.20520.1	+	15233	13	Equilibrative nucleoside transporter 3	AgE18_g001_t06	PgE052_g001_t04	8.92	12.4	0.05	0.03	0.01	1.19	0.01
Tg0541	33281	34652	MSTRG.20521.1	+	1371	2	hypothetical protein			0	0	0.37	0.31	0	0	0
Tg0541	35889	78311	MSTRG.20522.1	+	42422	25	ubiquitin carboxyl-terminal hydrolase 7	AgE20_g008_t04,AgE06_g020_t05,AgB16X_g001_t03	PgB22_g042_t04	0.9	6.96	5.57	2.88	0.09	0.49	0.69
Tg0541	79577	83541	MSTRG.20523.1	-	3964	5	hypothetical protein	AgE04_g006_t11	PgE396_g002_t01	30.39	13.29	0.02	0.01	0.01	1.21	0
Tg0541	88207	92084	MSTRG.20524.2	+	3877	4	hypothetical protein		PgE004_g003_t01	31.2	25.43	0.07	0.06	0.03	1.99	0
Tg0541	92149	93246	MSTRG.20525.2	-	1097	2	hypothetical protein			1.12	1.12	0	0.02	0	0.05	0
[truncated: 1,490 more rows]

## Sheet: Summary
		Gene Number			%
[truncated: 9 more rows]
