# Supplementary material for: Comparative genome analysis of programmed DNA elimination in nematodes
Source: HighWire-hosted journal article supplement (doi:10.1101/gr.225730.117), 2017-11-08
Supplement: Supplemental_Table_S12.xlsx [file Supplemental_Table_S12.xlsx]

## Sheet: Ascaris GO annotation
Transcript_name	Description	Length	# Hits	e-value	similarity mean	# GO	GO IDs	GO Names
AgB01_g001_t01	---NA---	65
AgB01_g002_t01	Methyltransferase 13	191	20	8.85218e-23	51.5	8	F:GO:0005524; F:GO:0042393; P:GO:0008152; C:GO:0016020; C:GO:0016021; F:GO:0008168; F:GO:0016740; P:GO:0032259	F:ATP binding; F:histone binding; P:metabolic process; C:membrane; C:integral component of membrane; F:methyltransferase activity; F:transferase activity; P:methylation
AgB01_g003_t01	Methyltransferase 13	145	20	3.40479e-18	53.1	8	F:GO:0005524; F:GO:0042393; P:GO:0008152; C:GO:0016020; C:GO:0016021; F:GO:0008168; F:GO:0016740; P:GO:0032259	F:ATP binding; F:histone binding; P:metabolic process; C:membrane; C:integral component of membrane; F:methyltransferase activity; F:transferase activity; P:methylation
AgB01_g004_t01	REST corepressor	226	1	4.95875e-128	99	2	F:GO:0003677; C:GO:0005634	F:DNA binding; C:nucleus
AgB01_g005_t01	Methyltransferase 13	199	20	4.04028e-26	53.05	8	F:GO:0005524; F:GO:0042393; P:GO:0008152; C:GO:0016020; C:GO:0016021; F:GO:0008168; F:GO:0016740; P:GO:0032259	F:ATP binding; F:histone binding; P:metabolic process; C:membrane; C:integral component of membrane; F:methyltransferase activity; F:transferase activity; P:methylation
AgB01_g006_t01	Histidine acid phosphatase family	117	20	2.80043e-40	60.5	3	P:GO:0016311; F:GO:0003993; F:GO:0016787	P:dephosphorylation; F:acid phosphatase activity; F:hydrolase activity
AgB01_g007_t02	Methyltransferase 13	112	20	7.14521e-20	56.55	8	F:GO:0005524; F:GO:0042393; P:GO:0008152; C:GO:0016020; C:GO:0016021; F:GO:0008168; F:GO:0016740; P:GO:0032259	F:ATP binding; F:histone binding; P:metabolic process; C:membrane; C:integral component of membrane; F:methyltransferase activity; F:transferase activity; P:methylation
AgB01_g008_t02	---NA---	86
AgB01_g009_t05	A orin or aquaglyceroporin related family member (aqp-8)	307	20	0	65.4	15	P:GO:0009992; F:GO:0015254; P:GO:0015793; P:GO:0071918; P:GO:0034220; F:GO:0022838; F:GO:0015250; P:GO:0006810; F:GO:0005215; C:GO:0009986; C:GO:0005887; P:GO:0006833; C:GO:0016020; C:GO:0016021; F:GO:0015204	P:cellular water homeostasis; F:glycerol channel activity; P:glycerol transport; P:urea transmembrane transport; P:ion transmembrane transport; F:substrate-specific channel activity; F:water channel activity; P:transport; F:transporter activity; C:cell surface; C:integral component of plasma membrane; P:water transport; C:membrane; C:integral component of membrane; F:urea transmembrane transporte…
AgB01_g010_t04	elegans ly confirmed by transcript evidence	255	5	5.9124e-38	73	2	C:GO:0016020; C:GO:0016021	C:membrane; C:integral component of membrane
AgB01_g011_t01	P40	401	20	0	73.25	2	F:GO:0046872; P:GO:0009792	F:metal ion binding; P:embryo development ending in birth or egg hatching
AgB01_g012_t01	Nuclear hormone receptor family member nhr-91	562	20	0	63.1	26	P:GO:0019915; P:GO:0006260; P:GO:0009792; F:GO:0000978; F:GO:0043565; F:GO:0004386; P:GO:0043401; C:GO:0042555; F:GO:0000166; C:GO:0005667; F:GO:0005524; F:GO:0003700; F:GO:0004879; P:GO:0032508; F:GO:0003707; P:GO:0006270; P:GO:0040026; F:GO:0008270; P:GO:0006351; P:GO:0006355; F:GO:0003677; C:GO:0005634; F:GO:0003678; P:GO:0030518; F:GO:0046872; F:GO:0016787	P:lipid storage; P:DNA replication; P:embryo development ending in birth or egg hatching; F:RNA polymerase II core promoter proximal region sequence-specific DNA binding; F:sequence-specific DNA binding; F:helicase activity; P:steroid hormone mediated signaling pathway; C:MCM complex; F:nucleotide binding; C:transcription factor complex; F:ATP binding; F:transcription factor activity, sequence-sp…
AgB01_g013_t01	nuclear receptor NHR-91	87	11	2.51001e-52	67.64	13	P:GO:0040026; P:GO:0019915; F:GO:0008270; P:GO:0006351; P:GO:0009792; P:GO:0006355; F:GO:0043565; P:GO:0043401; F:GO:0003677; C:GO:0005634; F:GO:0003700; F:GO:0046872; F:GO:0003707	P:positive regulation of vulval development; P:lipid storage; F:zinc ion binding; P:transcription, DNA-templated; P:embryo development ending in birth or egg hatching; P:regulation of transcription, DNA-templated; F:sequence-specific DNA binding; P:steroid hormone mediated signaling pathway; F:DNA binding; C:nucleus; F:transcription factor activity, sequence-specific DNA binding; F:metal ion bind…
AgB01_g014_t01	---NA---	130
AgB01_g015_t01	---NA---	86
AgB01_g016_t01	Calponin homolog OV9M	412	20	0	60.2	16	P:GO:1904111; P:GO:0031032; P:GO:0040011; P:GO:0030163; P:GO:1904113; P:GO:0010171; P:GO:0043652; C:GO:0042642; C:GO:0042643; F:GO:0051015; C:GO:0005865; C:GO:0001725; F:GO:0017022; C:GO:0031674; P:GO:0031034; P:GO:0051017	P:negative regulation of plus-end directed microfilament motor activity; P:actomyosin structure organization; P:locomotion; P:protein catabolic process; P:negative regulation of muscle filament sliding; P:body morphogenesis; P:engulfment of apoptotic cell; C:actomyosin, myosin complex part; C:actomyosin, actin portion; F:actin filament binding; C:striated muscle thin filament; C:stress fiber; F:m…
AgB01_g017_t02	---NA---	50
AgB01_g018_t02	enoyl- mitochondrial	292	20	0	77.15	12	P:GO:0006635; C:GO:0070062; C:GO:0005759; P:GO:0002119; F:GO:0003824; F:GO:0016508; P:GO:0008152; C:GO:0005739; P:GO:0006629; F:GO:0016829; F:GO:0004300; P:GO:0006631	P:fatty acid beta-oxidation; C:extracellular exosome; C:mitochondrial matrix; P:nematode larval development; F:catalytic activity; F:long-chain-enoyl-CoA hydratase activity; P:metabolic process; C:mitochondrion; P:lipid metabolic process; F:lyase activity; F:enoyl-CoA hydratase activity; P:fatty acid metabolic process
AgB01_g019_t01	Valyl-tRNA synthetase	796	20	0	79.15	19	P:GO:0006450; P:GO:0009792; F:GO:0002161; P:GO:0006898; P:GO:0040018; P:GO:0000003; P:GO:0006412; F:GO:0000166; F:GO:0004832; P:GO:0006418; F:GO:0005524; F:GO:0004812; P:GO:0006438; C:GO:0005737; P:GO:0002119; P:GO:0006915; C:GO:0005829; P:GO:0018996; F:GO:0016874	P:regulation of translational fidelity; P:embryo development ending in birth or egg hatching; F:aminoacyl-tRNA editing activity; P:receptor-mediated endocytosis; P:positive regulation of multicellular organism growth; P:reproduction; P:translation; F:nucleotide binding; F:valine-tRNA ligase activity; P:tRNA aminoacylation for protein translation; F:ATP binding; F:aminoacyl-tRNA ligase activity; P…
AgB01_g020_t02	ftsJ methyltransferase domain-containing 1-like	365	20	3.63865e-88	53.5	11	C:GO:0005634; P:GO:0097310; C:GO:0005737; P:GO:0006370; C:GO:0016020; C:GO:0016021; F:GO:0004483; F:GO:0008168; P:GO:0006397; F:GO:0016740; P:GO:0032259	C:nucleus; P:cap2 mRNA methylation; C:cytoplasm; P:7-methylguanosine mRNA capping; C:membrane; C:integral component of membrane; F:mRNA (nucleoside-2'-O-)-methyltransferase activity; F:methyltransferase activity; P:mRNA processing; F:transferase activity; P:methylation
AgB01_g021_t01	---NA---	104
AgB01_g022_t01	---NA---	443
AgB01_g023_t02	Kunitz Bovine pancreatic trypsin inhibitor domain containing	432	20	4.38306e-119	60.25	5	F:GO:0004867; P:GO:0000042; P:GO:0045132; P:GO:0010951; C:GO:0005622	F:serine-type endopeptidase inhibitor activity; P:protein targeting to Golgi; P:meiotic chromosome segregation; P:negative regulation of endopeptidase activity; C:intracellular
AgB01_g024_t01	Kunitz Bovine pancreatic trypsin inhibitor domain containing	269	20	2.14256e-159	65	3	F:GO:0004867; P:GO:0045132; P:GO:0010951	F:serine-type endopeptidase inhibitor activity; P:meiotic chromosome segregation; P:negative regulation of endopeptidase activity
AgB01_g025_t02	Sentrin-specific protease 7	658	20	0	49.55	7	C:GO:0005634; F:GO:0005515; P:GO:0006508; F:GO:0008234; F:GO:0008233; C:GO:0005622; F:GO:0016787	C:nucleus; F:protein binding; P:proteolysis; F:cysteine-type peptidase activity; F:peptidase activity; C:intracellular; F:hydrolase activity
AgB01_g026_t05	angiogenesis inhibito	432	20	7.34086e-170	54.5	14	F:GO:0008270; P:GO:0040011; P:GO:0008340; P:GO:0008361; P:GO:0010171; F:GO:0008233; P:GO:0043652; F:GO:0004222; P:GO:0040018; F:GO:0008237; P:GO:0002119; P:GO:0006508; P:GO:0030199; P:GO:0018996	F:zinc ion binding; P:locomotion; P:determination of adult lifespan; P:regulation of cell size; P:body morphogenesis; F:peptidase activity; P:engulfment of apoptotic cell; F:metalloendopeptidase activity; P:positive regulation of multicellular organism growth; F:metallopeptidase activity; P:nematode larval development; P:proteolysis; P:collagen fibril organization; P:molting cycle, collagen and c…
AgB01_g027_t04	Acyltransferase family	398	20	0	55.8	11	F:GO:0003841; F:GO:0016746; P:GO:0019915; P:GO:0009792; P:GO:0008152; C:GO:0016020; P:GO:0006629; C:GO:0016021; P:GO:0008654; P:GO:0016024; F:GO:0016740	F:1-acylglycerol-3-phosphate O-acyltransferase activity; F:transferase activity, transferring acyl groups; P:lipid storage; P:embryo development ending in birth or egg hatching; P:metabolic process; C:membrane; P:lipid metabolic process; C:integral component of membrane; P:phospholipid biosynthetic process; P:CDP-diacylglycerol biosynthetic process; F:transferase activity
AgB01_g028_t09	CEll Death abnormality family member (ced-1)	658	20	0	53.95	25	C:GO:0031260; C:GO:0005576; C:GO:0005575; C:GO:0001891; P:GO:0001845; F:GO:0005509; P:GO:0006915; C:GO:0031410; P:GO:0034620; P:GO:0031532; P:GO:0008150; F:GO:0005044; P:GO:0043652; P:GO:0006952; P:GO:0006898; P:GO:0043654; P:GO:0042742; C:GO:0005886; C:GO:0009986; P:GO:0045184; F:GO:0005515; C:GO:0016020; C:GO:0016021; C:GO:0030670; P:GO:0012501	C:pseudopodium membrane; C:extracellular region; C:cellular_component; C:phagocytic cup; P:phagolysosome assembly; F:calcium ion binding; P:apoptotic process; C:cytoplasmic vesicle; P:cellular response to unfolded protein; P:actin cytoskeleton reorganization; P:biological_process; F:scavenger receptor activity; P:engulfment of apoptotic cell; P:defense response; P:receptor-mediated endocytosis; P…
AgB01_g029_t01	Multiple EGF-like-domains 10	172	20	1.72241e-97	59.85	36	C:GO:0031260; P:GO:0007155; C:GO:0042995; C:GO:0005575; C:GO:0001891; F:GO:0003674; P:GO:0051147; P:GO:0014719; P:GO:0001845; P:GO:0048641; P:GO:0006915; P:GO:0014816; C:GO:0031410; P:GO:0034620; P:GO:0034109; P:GO:0031532; P:GO:0055001; F:GO:0005044; P:GO:0043652; P:GO:0006952; P:GO:0006898; P:GO:0043654; P:GO:0042742; C:GO:0005886; C:GO:0009986; P:GO:0045184; P:GO:0007517; F:GO:0005515; C:GO:00…	C:pseudopodium membrane; P:cell adhesion; C:cell projection; C:cellular_component; C:phagocytic cup; F:molecular_function; P:regulation of muscle cell differentiation; P:skeletal muscle satellite cell activation; P:phagolysosome assembly; P:regulation of skeletal muscle tissue development; P:apoptotic process; P:skeletal muscle satellite cell differentiation; C:cytoplasmic vesicle; P:cellular res…
AgB01_g030_t02	---NA---	681
AgB01_g031_t01	Chronic lymphocytic leukemia deletion region gene 6	178	20	1.98463e-79	69.25	1	F:GO:0005515	F:protein binding
AgB01_g032_t02	hypothetical protein	602	5	2.91791e-43	50.8	2	P:GO:0000723; F:GO:0043047	P:telomere maintenance; F:single-stranded telomeric DNA binding
AgB01_g033_t02	---NA---	201
AgB01_g034_t01	---NA---	152
AgB01_g035_t02	hypothetical protein LOAG_10048	613	4	9.48373e-22	47.25
AgB01_g036_t03	Oxysterol-binding 1	114	20	1.41615e-65	68.2	2	P:GO:0006869; P:GO:0006810	P:lipid transport; P:transport
AgB01_g037_t01	dedicator of cytokinesis 9-like	2053	20	0	54.55	5	P:GO:0007264; F:GO:0005085; C:GO:0016020; C:GO:0005622; P:GO:0043547	P:small GTPase mediated signal transduction; F:guanyl-nucleotide exchange factor activity; C:membrane; C:intracellular; P:positive regulation of GTPase activity
AgB01_g038_t01	dedicator of cytokinesis 9	73	20	1.30871e-39	66.9	15	P:GO:0008150; P:GO:0007264; F:GO:0005085; F:GO:0005089; P:GO:0007596; P:GO:0043547; C:GO:0005622; F:GO:0098641; F:GO:0005515; C:GO:0005913; C:GO:0016020; C:GO:0005829; C:GO:0012505; F:GO:0017048; P:GO:0098609	P:biological_process; P:small GTPase mediated signal transduction; F:guanyl-nucleotide exchange factor activity; F:Rho guanyl-nucleotide exchange factor activity; P:blood coagulation; P:positive regulation of GTPase activity; C:intracellular; F:cadherin binding involved in cell-cell adhesion; F:protein binding; C:cell-cell adherens junction; C:membrane; C:cytosol; C:endomembrane system; F:Rho GTP…
AgB01_g039_t02	Phosphatidylinositol transfer	147	20	3.0549e-102	69.05	2	P:GO:0006810; C:GO:0005622	P:transport; C:intracellular
AgB01_g040_t01	---NA---	88
AgB01_g041_t03	CK1 WORM6 kinase	324	20	0	69.6	11	F:GO:0000166; P:GO:0008360; C:GO:0005634; F:GO:0005524; C:GO:0005737; F:GO:0004672; P:GO:0016310; F:GO:0004674; P:GO:0018105; P:GO:0006468; F:GO:0016301	F:nucleotide binding; P:regulation of cell shape; C:nucleus; F:ATP binding; C:cytoplasm; F:protein kinase activity; P:phosphorylation; F:protein serine/threonine kinase activity; P:peptidyl-serine phosphorylation; P:protein phosphorylation; F:kinase activity
AgB01_g042_t01	---NA---	209
AgB01_g043_t01	---NA---	115
AgB01_g044_t01	---NA---	92
AgB01_g045_t09	major facilitator superfamily transporter	505	20	0	56.8	9	P:GO:0006814; P:GO:0006811; P:GO:0055085; F:GO:0022857; C:GO:0016020; C:GO:0016021; F:GO:0015293; P:GO:0006820; P:GO:0006810	P:sodium ion transport; P:ion transport; P:transmembrane transport; F:transmembrane transporter activity; C:membrane; C:integral component of membrane; F:symporter activity; P:anion transport; P:transport
AgB01_g046_t02	ribophorin II	641	20	0	54.4	7	F:GO:0004579; C:GO:0008250; F:GO:0016757; C:GO:0016020; C:GO:0016021; P:GO:0006487; F:GO:0016740	F:dolichyl-diphosphooligosaccharide-protein glycotransferase activity; C:oligosaccharyltransferase complex; F:transferase activity, transferring glycosyl groups; C:membrane; C:integral component of membrane; P:protein N-linked glycosylation; F:transferase activity
AgB01_g047_t02	malonyl- synthase	513	20	0	68.1	6	P:GO:0001676; F:GO:0003824; P:GO:0008152; F:GO:0008756; F:GO:0016874; F:GO:0004467	P:long-chain fatty acid metabolic process; F:catalytic activity; P:metabolic process; F:o-succinylbenzoate-CoA ligase activity; F:ligase activity; F:long-chain fatty acid-CoA ligase activity
AgB01_g048_t01	WW domain containing	473	20	0	55.05	86	P:GO:0060242; P:GO:0060487; F:GO:0008022; P:GO:0045807; F:GO:0000979; P:GO:0060449; C:GO:0005794; P:GO:0045723; P:GO:0070086; C:GO:0005667; F:GO:0001076; P:GO:0030903; P:GO:0048368; P:GO:0032443; C:GO:0005829; C:GO:0031234; P:GO:2000232; P:GO:2000238; P:GO:0072307; P:GO:2000235; P:GO:0032880; P:GO:0000902; P:GO:0090263; P:GO:0046622; P:GO:0006333; P:GO:0003143; P:GO:0006975; P:GO:0042787; P:GO:00…	P:contact inhibition; P:lung epithelial cell differentiation; F:protein C-terminus binding; P:positive regulation of endocytosis; F:RNA polymerase II core promoter sequence-specific DNA binding; P:bud elongation involved in lung branching; C:Golgi apparatus; P:positive regulation of fatty acid biosynthetic process; P:ubiquitin-dependent endocytosis; C:transcription factor complex; F:transcription…
AgB01_g049_t01	---NA---	125
AgB01_g050_t03	elegans confirmed by transcript evidence	430	20	0	74.45	2	P:GO:0009792; P:GO:0000003	P:embryo development ending in birth or egg hatching; P:reproduction
AgB01_g051_t01	Zinc finger HIT domain-containing 1	180	20	3.47342e-103	52.75	8	P:GO:0040027; F:GO:0042826; F:GO:0031491; P:GO:0031063; P:GO:0006915; P:GO:0043486; C:GO:0000812; P:GO:0016246	P:negative regulation of vulval development; F:histone deacetylase binding; F:nucleosome binding; P:regulation of histone deacetylation; P:apoptotic process; P:histone exchange; C:Swr1 complex; P:RNA interference
AgB01_g052_t01	UBX domain-containing 7	494	20	0	60.95	10	P:GO:0008150; C:GO:0005634; F:GO:0005515; F:GO:0031625; F:GO:0043130; C:GO:0034098; F:GO:0008134; C:GO:0005575; F:GO:0003674; C:GO:0005654	P:biological_process; C:nucleus; F:protein binding; F:ubiquitin protein ligase binding; F:ubiquitin binding; C:VCP-NPL4-UFD1 AAA ATPase complex; F:transcription factor binding; C:cellular_component; F:molecular_function; C:nucleoplasm
AgB01_g053_t01	Beta-lactamase domain-containing 2	149	3	1.95528e-76	61
AgB01_g054_t01	briggsae CBR-DEL-1	350	20	2.93193e-105	68.5	22	P:GO:0061096; P:GO:0034220; F:GO:0005272; P:GO:0043200; P:GO:0043652; F:GO:0015280; P:GO:0006810; C:GO:0005886; P:GO:0009612; P:GO:0007638; P:GO:0006814; F:GO:0005216; C:GO:0005887; P:GO:0006811; P:GO:0070265; C:GO:0016020; C:GO:0016021; P:GO:0035725; P:GO:0010447; P:GO:0050954; P:GO:0050896; C:GO:0032589	P:negative regulation of turning behavior involved in mating; P:ion transmembrane transport; F:sodium channel activity; P:response to amino acid; P:engulfment of apoptotic cell; F:ligand-gated sodium channel activity; P:transport; C:plasma membrane; P:response to mechanical stimulus; P:mechanosensory behavior; P:sodium ion transport; F:ion channel activity; C:integral component of plasma membrane…
AgB01_g055_t01	potassium channel tetramerisation domain containing 12b	183	20	1.14956e-35	58.95	8	C:GO:0042734; P:GO:0006811; C:GO:0045211; P:GO:0051260; C:GO:0043235; P:GO:0008277; P:GO:0006810; F:GO:0003674	C:presynaptic membrane; P:ion transport; C:postsynaptic membrane; P:protein homooligomerization; C:receptor complex; P:regulation of G-protein coupled receptor protein signaling pathway; P:transport; F:molecular_function
AgB01_g056_t03	---NA---	130
AgB01_g057_t07	---NA---	184
AgB01_g058_t01	---NA---	53
AgB01_g059_t01	hypothetical protein LOAG_03052	228	1	6.01822e-24	49	2	C:GO:0016020; C:GO:0016021	C:membrane; C:integral component of membrane
AgB01_g060_t01	Neurotransmitter-gated ion-channel ligand binding domain containing	527	20	0	63.85	17	C:GO:0014069; P:GO:1902476; P:GO:0034220; F:GO:0005230; F:GO:0005254; C:GO:0043025; C:GO:0045202; P:GO:0006810; P:GO:0006821; C:GO:0005886; P:GO:0009612; P:GO:0007638; P:GO:0006811; C:GO:0016020; C:GO:0016021; C:GO:0030054; P:GO:0050954	C:postsynaptic density; P:chloride transmembrane transport; P:ion transmembrane transport; F:extracellular ligand-gated ion channel activity; F:chloride channel activity; C:neuronal cell body; C:synapse; P:transport; P:chloride transport; C:plasma membrane; P:response to mechanical stimulus; P:mechanosensory behavior; P:ion transport; C:membrane; C:integral component of membrane; C:cell junction;…
AgB01_g061_t10	Prolactin regulatory element-binding	451	20	0	51.95	8	P:GO:0002119; P:GO:0040011; P:GO:0009792; C:GO:0016020; P:GO:0006508; C:GO:0016021; F:GO:0008234; P:GO:0000003	P:nematode larval development; P:locomotion; P:embryo development ending in birth or egg hatching; C:membrane; P:proteolysis; C:integral component of membrane; F:cysteine-type peptidase activity; P:reproduction
AgB01_g062_t01	Prolactin regulatory element-binding	157	8	1.48578e-83	61.5	6	P:GO:0002119; P:GO:0040011; P:GO:0009792; C:GO:0016020; C:GO:0016021; P:GO:0000003	P:nematode larval development; P:locomotion; P:embryo development ending in birth or egg hatching; C:membrane; C:integral component of membrane; P:reproduction
AgB01_g063_t01	Ankyrin repeat domain-containing 49	185	20	2.34132e-136	65.95	3	F:GO:0016624; P:GO:0008152; P:GO:0055114	F:oxidoreductase activity, acting on the aldehyde or oxo group of donors, disulfide as acceptor; P:metabolic process; P:oxidation-reduction process
AgB01_g064_t01	DHHC zinc finger domain containing	293	20	0	53.45	7	F:GO:0016746; F:GO:0008270; F:GO:0019706; F:GO:0046872; C:GO:0016020; C:GO:0016021; F:GO:0016740	F:transferase activity, transferring acyl groups; F:zinc ion binding; F:protein-cysteine S-palmitoyltransferase activity; F:metal ion binding; C:membrane; C:integral component of membrane; F:transferase activity
AgB01_g065_t02	85 kDa calcium-independent phospholipase A2	643	20	0	49.2	42	P:GO:0090238; P:GO:0090037; P:GO:0045909; F:GO:0008168; C:GO:0005694; P:GO:0007613; F:GO:0043008; P:GO:0045921; P:GO:0006935; P:GO:0034968; F:GO:0047499; C:GO:0005829; P:GO:0051967; P:GO:0035774; P:GO:0014832; P:GO:0032049; F:GO:0019901; P:GO:0008152; P:GO:0090200; P:GO:0006355; P:GO:1901339; P:GO:0007204; F:GO:0004623; F:GO:0003677; C:GO:0005634; C:GO:0005615; F:GO:0005516; C:GO:0005815; C:GO:00…	P:positive regulation of arachidonic acid secretion; P:positive regulation of protein kinase C signaling; P:positive regulation of vasodilation; F:methyltransferase activity; C:chromosome; P:memory; F:ATP-dependent protein binding; P:positive regulation of exocytosis; P:chemotaxis; P:histone lysine methylation; F:calcium-independent phospholipase A2 activity; C:cytosol; P:negative regulation of s…
AgB01_g066_t01	FAM114A2	459	20	0	48.25
AgB01_g067_t01	Mitochondrial carrier triple repeat 1	322	20	8.05552e-131	59.35	8	F:GO:0003735; P:GO:0040011; P:GO:0009792; C:GO:0005739; C:GO:0016020; C:GO:0016021; P:GO:0006810; P:GO:0006412	F:structural constituent of ribosome; P:locomotion; P:embryo development ending in birth or egg hatching; C:mitochondrion; C:membrane; C:integral component of membrane; P:transport; P:translation
AgB01_g068_t05	---NA---	100
AgB01_g069_t01	---NA---	44
AgB01_g070_t01	Spermatogenesis-associated 13	102	20	1.51357e-64	69.65	20	P:GO:0035023; F:GO:0005085; F:GO:0005089; C:GO:0042995; P:GO:0046847; C:GO:0005622; P:GO:0043547; C:GO:0005886; C:GO:0005654; C:GO:0005737; C:GO:0016020; C:GO:0016021; C:GO:0032587; P:GO:0030032; C:GO:0030175; P:GO:0030334; P:GO:0016477; P:GO:0035556; F:GO:0030676; C:GO:0030027	P:regulation of Rho protein signal transduction; F:guanyl-nucleotide exchange factor activity; F:Rho guanyl-nucleotide exchange factor activity; C:cell projection; P:filopodium assembly; C:intracellular; P:positive regulation of GTPase activity; C:plasma membrane; C:nucleoplasm; C:cytoplasm; C:membrane; C:integral component of membrane; C:ruffle membrane; P:lamellipodium assembly; C:filopodium; P…
AgB01_g071_t01	elegans ly confirmed by transcript evidence	339	20	4.64771e-102	58.05	17	P:GO:0007271; F:GO:0015464; P:GO:0007165; F:GO:0022848; P:GO:0034220; F:GO:0005230; F:GO:0042166; C:GO:0005892; P:GO:0006810; P:GO:0045989; P:GO:0099565; P:GO:0006811; C:GO:0098794; C:GO:0016020; P:GO:0098655; C:GO:0016021; P:GO:0030421	P:synaptic transmission, cholinergic; F:acetylcholine receptor activity; P:signal transduction; F:acetylcholine-gated cation-selective channel activity; P:ion transmembrane transport; F:extracellular ligand-gated ion channel activity; F:acetylcholine binding; C:acetylcholine-gated channel complex; P:transport; P:positive regulation of striated muscle contraction; P:chemical synaptic transmission,…
AgB01_g072_t03	---NA---	192
AgB01_g073_t02	Propionyl-Coenzyme A alpha polypeptide	604	20	0	78.45	15	P:GO:0019626; F:GO:0009374; F:GO:0004075; C:GO:0005575; F:GO:0000166; F:GO:0005524; F:GO:0004658; P:GO:0006768; C:GO:0005759; F:GO:0046872; F:GO:0003824; C:GO:0005739; C:GO:0005829; F:GO:0016874; F:GO:0019899	P:short-chain fatty acid catabolic process; F:biotin binding; F:biotin carboxylase activity; C:cellular_component; F:nucleotide binding; F:ATP binding; F:propionyl-CoA carboxylase activity; P:biotin metabolic process; C:mitochondrial matrix; F:metal ion binding; F:catalytic activity; C:mitochondrion; C:cytosol; F:ligase activity; F:enzyme binding
AgB01_g074_t01	propionyl-Coenzyme A alpha polypeptide	72	20	5.69491e-28	92.4	18	F:GO:0004180; F:GO:0008241; F:GO:0004075; F:GO:0008233; C:GO:0005575; F:GO:0008237; F:GO:0000166; F:GO:0005524; F:GO:0004658; C:GO:0005759; F:GO:0003824; F:GO:0046872; C:GO:0005739; C:GO:0016020; P:GO:0006508; F:GO:0016874; F:GO:0019899; F:GO:0016787	F:carboxypeptidase activity; F:peptidyl-dipeptidase activity; F:biotin carboxylase activity; F:peptidase activity; C:cellular_component; F:metallopeptidase activity; F:nucleotide binding; F:ATP binding; F:propionyl-CoA carboxylase activity; C:mitochondrial matrix; F:catalytic activity; F:metal ion binding; C:mitochondrion; C:membrane; P:proteolysis; F:ligase activity; F:enzyme binding; F:hydrolas…
AgB01_g075_t05	---NA---	88
AgB01_g076_t01	---NA---	109
AgB01_g077_t02	---NA---	55
AgB01_g078_t02	G -coupled receptor	258	20	3.22279e-27	49.55	9	F:GO:0004930; F:GO:0008528; P:GO:0007186; P:GO:0007165; C:GO:0016020; C:GO:0016021; C:GO:0005576; F:GO:0005179; F:GO:0004871	F:G-protein coupled receptor activity; F:G-protein coupled peptide receptor activity; P:G-protein coupled receptor signaling pathway; P:signal transduction; C:membrane; C:integral component of membrane; C:extracellular region; F:hormone activity; F:signal transducer activity
AgB01_g079_t01	hypothetical protein CRE_00644	187	9	1.29919e-13	43.22	5	F:GO:0004930; F:GO:0008528; P:GO:0007186; C:GO:0016020; C:GO:0016021	F:G-protein coupled receptor activity; F:G-protein coupled peptide receptor activity; P:G-protein coupled receptor signaling pathway; C:membrane; C:integral component of membrane
AgB01_g080_t01	---NA---	103
AgB01_g081_t01	Temporarily Assigned Gene name family member (tag-51)	517	8	0	56.13	4	C:GO:0000120; C:GO:0016020; P:GO:0006360; C:GO:0016021	C:RNA polymerase I transcription factor complex; C:membrane; P:transcription from RNA polymerase I promoter; C:integral component of membrane
AgB01_g082_t01	---NA---	153
AgB01_g083_t02	tRNA intron endonuclease family	129	6	1.13214e-37	57.33	11	P:GO:0090502; F:GO:0003676; P:GO:0090305; P:GO:0090501; P:GO:0008033; F:GO:0004518; F:GO:0016829; P:GO:0006388; P:GO:0000379; C:GO:0000214; F:GO:0000213	P:RNA phosphodiester bond hydrolysis, endonucleolytic; F:nucleic acid binding; P:nucleic acid phosphodiester bond hydrolysis; P:RNA phosphodiester bond hydrolysis; P:tRNA processing; F:nuclease activity; F:lyase activity; P:tRNA splicing, via endonucleolytic cleavage and ligation; P:tRNA-type intron splice site recognition and cleavage; C:tRNA-intron endonuclease complex; F:tRNA-intron endonuclea…
AgB01_g084_t01	U6 snRNA-associated Sm LSm2	95	20	1.65568e-64	95.2	24	F:GO:0019901; P:GO:0008380; P:GO:0043928; C:GO:0005681; C:GO:0000932; P:GO:0006397; P:GO:0006402; C:GO:0005688; P:GO:0000398; P:GO:0000244; F:GO:0003723; C:GO:0005654; F:GO:0017070; C:GO:0005634; F:GO:0005515; F:GO:0017160; F:GO:0003723; C:GO:0030529; C:GO:0071013; C:GO:0005737; C:GO:0071011; C:GO:0046540; C:GO:0005829; C:GO:1990726	F:protein kinase binding; P:RNA splicing; P:exonucleolytic nuclear-transcribed mRNA catabolic process involved in deadenylation-dependent decay; C:spliceosomal complex; C:P-body; P:mRNA processing; P:mRNA catabolic process; C:U6 snRNP; P:mRNA splicing, via spliceosome; P:spliceosomal tri-snRNP complex assembly; F:RNA binding; C:nucleoplasm; F:U6 snRNA binding; C:nucleus; F:protein binding; F:Ral …
AgB01_g085_t01	hypothetical protein CRE_00260	211	5	5.65711e-06	51.4	2	C:GO:0016020; C:GO:0016021	C:membrane; C:integral component of membrane
AgB01_g086_t02	hypothetical protein LOAG_04690	251	8	3.90967e-73	57.13	5	P:GO:0002119; P:GO:0040011; C:GO:0016020; C:GO:0016021; P:GO:0040018	P:nematode larval development; P:locomotion; C:membrane; C:integral component of membrane; P:positive regulation of multicellular organism growth
AgB01_g087_t03	Unidentified Vitellogenin-linked Transcript family member (uvt-5)	301	20	0	77.55	10	F:GO:0016757; P:GO:0005978; C:GO:0005737; C:GO:0055120; F:GO:0046872; P:GO:0002119; P:GO:0009792; F:GO:0008466; F:GO:0016740; P:GO:0000003	F:transferase activity, transferring glycosyl groups; P:glycogen biosynthetic process; C:cytoplasm; C:striated muscle dense body; F:metal ion binding; P:nematode larval development; P:embryo development ending in birth or egg hatching; F:glycogenin glucosyltransferase activity; F:transferase activity; P:reproduction
AgB01_g088_t01	---NA---	126
AgB01_g089_t02	G- coupled receptor	191	20	9.91651e-98	60.15	7	F:GO:0004930; P:GO:0007186; P:GO:0007165; C:GO:0016020; C:GO:0016021; F:GO:0004871; C:GO:0005886	F:G-protein coupled receptor activity; P:G-protein coupled receptor signaling pathway; P:signal transduction; C:membrane; C:integral component of membrane; F:signal transducer activity; C:plasma membrane
AgB01_g090_t01	elegans ly confirmed by transcript evidence	192	20	5.75523e-37	59.25	8	F:GO:0004930; P:GO:0007186; P:GO:0007165; P:GO:0040011; C:GO:0016020; C:GO:0016021; F:GO:0004871; C:GO:0005886	F:G-protein coupled receptor activity; P:G-protein coupled receptor signaling pathway; P:signal transduction; P:locomotion; C:membrane; C:integral component of membrane; F:signal transducer activity; C:plasma membrane
AgB01_g091_t02	---NA---	163
AgB01_g092_t02	---NA---	130
AgB01_g093_t03	coenzyme Q4 isoform 1	170	20	1.28505e-93	67.1	6	C:GO:0005739; C:GO:0016020; C:GO:0031314; P:GO:0006744; F:GO:0003674; C:GO:0005743	C:mitochondrion; C:membrane; C:extrinsic component of mitochondrial inner membrane; P:ubiquinone biosynthetic process; F:molecular_function; C:mitochondrial inner membrane
AgB01_g094_t01	Polymerase (DNA directed) epsilon 3 (p17 subunit)	182	20	2.27139e-44	79.15	15	P:GO:0008150; P:GO:0043966; F:GO:0016779; P:GO:0006260; C:GO:0005671; C:GO:0005575; F:GO:0003674; C:GO:0008622; F:GO:0003677; C:GO:0005634; F:GO:0003887; F:GO:0005515; F:GO:0046982; P:GO:0071897; F:GO:0016740	P:biological_process; P:histone H3 acetylation; F:nucleotidyltransferase activity; P:DNA replication; C:Ada2/Gcn5/Ada3 transcription activator complex; C:cellular_component; F:molecular_function; C:epsilon DNA polymerase complex; F:DNA binding; C:nucleus; F:DNA-directed DNA polymerase activity; F:protein binding; F:protein heterodimerization activity; P:DNA biosynthetic process; F:transferase act…
AgB01_g095_t03	Initiation factor 2 subunit family	359	20	0	62.65	21	P:GO:0019915; P:GO:0045947; P:GO:0040035; P:GO:0019509; P:GO:0040011; P:GO:0008340; P:GO:0009792; F:GO:0005085; F:GO:0046523; C:GO:0005851; P:GO:0006413; P:GO:0044237; P:GO:0006898; P:GO:0043547; P:GO:0000003; P:GO:0040039; P:GO:0006412; F:GO:0003743; P:GO:0006979; P:GO:0009408; P:GO:0002119	P:lipid storage; P:negative regulation of translational initiation; P:hermaphrodite genitalia development; P:L-methionine salvage from methylthioadenosine; P:locomotion; P:determination of adult lifespan; P:embryo development ending in birth or egg hatching; F:guanyl-nucleotide exchange factor activity; F:S-methyl-5-thioribose-1-phosphate isomerase activity; C:eukaryotic translation initiation fa…
AgB01_g096_t04	elegans ly confirmed by transcript evidence	397	20	0	65.65	10	F:GO:0004930; C:GO:0005887; P:GO:0007218; P:GO:0007186; P:GO:0007165; C:GO:0016020; C:GO:0016021; P:GO:0007166; F:GO:0004871; F:GO:0004983	F:G-protein coupled receptor activity; C:integral component of plasma membrane; P:neuropeptide signaling pathway; P:G-protein coupled receptor signaling pathway; P:signal transduction; C:membrane; C:integral component of membrane; P:cell surface receptor signaling pathway; F:signal transducer activity; F:neuropeptide Y receptor activity
AgB01_g097_t01	WD repeat-containing 47	267	20	0	57.85
AgB01_g098_t01	elegans ly confirmed by transcript evidence	171	1	1.82804e-05	45
AgB01_g099_t01	LETM1 and EF-hand domain-containing 1	793	20	0	70.35	11	F:GO:0046872; F:GO:0005509; F:GO:0043022; P:GO:0009792; C:GO:0005739; C:GO:0016020; C:GO:0016021; P:GO:0006875; P:GO:0006898; C:GO:0005743; P:GO:0040018	F:metal ion binding; F:calcium ion binding; F:ribosome binding; P:embryo development ending in birth or egg hatching; C:mitochondrion; C:membrane; C:integral component of membrane; P:cellular metal ion homeostasis; P:receptor-mediated endocytosis; C:mitochondrial inner membrane; P:positive regulation of multicellular organism growth
AgB01_g100_t08	isoform CRA_b	101	20	8.45912e-15	60.35	15	P:GO:0008150; P:GO:0055085; P:GO:0034220; C:GO:0005730; P:GO:0006821; P:GO:0006810; F:GO:0003674; F:GO:0005247; C:GO:0005634; F:GO:0005216; P:GO:1903959; P:GO:0006811; C:GO:0005737; C:GO:0016020; C:GO:0016021	P:biological_process; P:transmembrane transport; P:ion transmembrane transport; C:nucleolus; P:chloride transport; P:transport; F:molecular_function; F:voltage-gated chloride channel activity; C:nucleus; F:ion channel activity; P:regulation of anion transmembrane transport; P:ion transport; C:cytoplasm; C:membrane; C:integral component of membrane
AgB01_g101_t01	---NA---	224
AgB01_g102_t01	cation efflux family	345	20	0	62.9	11	P:GO:0010043; P:GO:0055085; P:GO:0006812; P:GO:0045087; P:GO:0098655; P:GO:0061088; C:GO:0016020; C:GO:0016021; F:GO:0008324; F:GO:0005385; P:GO:0071577	P:response to zinc ion; P:transmembrane transport; P:cation transport; P:innate immune response; P:cation transmembrane transport; P:regulation of sequestering of zinc ion; C:membrane; C:integral component of membrane; F:cation transmembrane transporter activity; F:zinc ion transmembrane transporter activity; P:zinc II ion transmembrane transport
AgB01_g103_t01	FMRFamide-related peptide FLP-18 precursor	161	20	1.39742e-110	69.2	14	P:GO:0009792; F:GO:0005184; C:GO:0005576; P:GO:0006972; F:GO:0003674; P:GO:0007638; C:GO:0005615; P:GO:0007218; P:GO:0007626; P:GO:0046662; C:GO:0016020; C:GO:0016021; F:GO:0071855; F:GO:0031841	P:embryo development ending in birth or egg hatching; F:neuropeptide hormone activity; C:extracellular region; P:hyperosmotic response; F:molecular_function; P:mechanosensory behavior; C:extracellular space; P:neuropeptide signaling pathway; P:locomotory behavior; P:regulation of oviposition; C:membrane; C:integral component of membrane; F:neuropeptide receptor binding; F:neuropeptide Y receptor …
AgB01_g104_t02	---NA---	53
AgB01_g105_t01	placental 11	601	20	0	54.2	22	F:GO:0016788; P:GO:0090502; P:GO:0090305; F:GO:0008083; F:GO:0008236; F:GO:0005044; P:GO:0007565; C:GO:0005576; P:GO:0006898; C:GO:0005886; F:GO:0004521; C:GO:0005615; F:GO:0003723; P:GO:0006955; C:GO:0005737; F:GO:0046872; F:GO:0004519; F:GO:0004518; P:GO:0006508; F:GO:0030145; F:GO:0030247; F:GO:0016787	F:hydrolase activity, acting on ester bonds; P:RNA phosphodiester bond hydrolysis, endonucleolytic; P:nucleic acid phosphodiester bond hydrolysis; F:growth factor activity; F:serine-type peptidase activity; F:scavenger receptor activity; P:female pregnancy; C:extracellular region; P:receptor-mediated endocytosis; C:plasma membrane; F:endoribonuclease activity; C:extracellular space; F:RNA binding…
AgB01_g106_t03	Zinc finger ZIC 3	267	20	0	72.95	36	P:GO:0007275; F:GO:0000978; F:GO:0000977; P:GO:0009952; P:GO:0007399; P:GO:0006366; F:GO:0043565; P:GO:0045944; P:GO:0006979; P:GO:0009948; F:GO:0003700; F:GO:0001077; P:GO:0030900; P:GO:0001843; P:GO:0045893; P:GO:0001947; P:GO:0071910; P:GO:0030324; P:GO:0006351; P:GO:0071907; P:GO:0006355; P:GO:0007389; P:GO:0007368; F:GO:0020037; F:GO:0004601; F:GO:0003676; F:GO:0003677; C:GO:0005634; F:GO:00…	P:multicellular organism development; F:RNA polymerase II core promoter proximal region sequence-specific DNA binding; F:RNA polymerase II regulatory region sequence-specific DNA binding; P:anterior/posterior pattern specification; P:nervous system development; P:transcription from RNA polymerase II promoter; F:sequence-specific DNA binding; P:positive regulation of transcription from RNA polymer…
AgB01_g107_t02	elegans ly confirmed by transcript evidence	461	13	1.48882e-80	52.92	3	P:GO:0006508; F:GO:0008234; P:GO:0000003	P:proteolysis; F:cysteine-type peptidase activity; P:reproduction
AgB01_g108_t02	NEK kinase	185	3	2.13789e-93	73.67	5	F:GO:0005524; F:GO:0004672; P:GO:0016310; P:GO:0006468; F:GO:0016301	F:ATP binding; F:protein kinase activity; P:phosphorylation; P:protein phosphorylation; F:kinase activity
AgB01_g109_t01	kinase domain containing	300	3	0	84.67	5	F:GO:0005524; F:GO:0004672; P:GO:0016310; P:GO:0006468; F:GO:0016301	F:ATP binding; F:protein kinase activity; P:phosphorylation; P:protein phosphorylation; F:kinase activity
AgB01_g110_t02	elegans confirmed by transcript evidence	509	20	0	63.45	20	P:GO:0040027; P:GO:0016539; P:GO:0007275; P:GO:0040011; P:GO:0009792; P:GO:0007267; P:GO:0007367; F:GO:0008233; C:GO:0005576; F:GO:0003674; P:GO:0040018; C:GO:0005886; C:GO:0009986; C:GO:0005615; P:GO:0006508; C:GO:0016020; C:GO:0016021; P:GO:0016540; P:GO:0018996; F:GO:0016787	P:negative regulation of vulval development; P:intein-mediated protein splicing; P:multicellular organism development; P:locomotion; P:embryo development ending in birth or egg hatching; P:cell-cell signaling; P:segment polarity determination; F:peptidase activity; C:extracellular region; F:molecular_function; P:positive regulation of multicellular organism growth; C:plasma membrane; C:cell surfa…
AgB01_g111_t03	propionyl- carboxylase beta mitochondrial	356	20	0	91.2	8	F:GO:0004402; P:GO:0040011; C:GO:0005739; P:GO:0006355; P:GO:0016573; P:GO:0018996; F:GO:0016874; P:GO:0040018	F:histone acetyltransferase activity; P:locomotion; C:mitochondrion; P:regulation of transcription, DNA-templated; P:histone acetylation; P:molting cycle, collagen and cuticulin-based cuticle; F:ligase activity; P:positive regulation of multicellular organism growth
AgB01_g112_t01	Propionyl- carboxylase	36	20	1.65425e-15	85.3	6	F:GO:0004658; F:GO:0003989; F:GO:0016740; P:GO:0006633; C:GO:0009317; F:GO:0016874	F:propionyl-CoA carboxylase activity; F:acetyl-CoA carboxylase activity; F:transferase activity; P:fatty acid biosynthetic process; C:acetyl-CoA carboxylase complex; F:ligase activity
AgB01_g113_t01	Propionyl- carboxylase beta chain	100	20	3.48646e-64	78.8	14	P:GO:0040011; P:GO:0006355; P:GO:0006633; C:GO:0009317; P:GO:0040018; F:GO:0004402; F:GO:0005524; F:GO:0004658; C:GO:0005759; F:GO:0003989; C:GO:0005739; P:GO:0016573; P:GO:0018996; F:GO:0016874	P:locomotion; P:regulation of transcription, DNA-templated; P:fatty acid biosynthetic process; C:acetyl-CoA carboxylase complex; P:positive regulation of multicellular organism growth; F:histone acetyltransferase activity; F:ATP binding; F:propionyl-CoA carboxylase activity; C:mitochondrial matrix; F:acetyl-CoA carboxylase activity; C:mitochondrion; P:histone acetylation; P:molting cycle, collage…
AgB01_g114_t01	parathyroid hormone 2 receptor	335	5	2.97795e-39	49.4
AgB01_g115_t06	---NA---	338
AgB01_g116_t07	m-phase phospho 8	462	20	1.60539e-15	73.8	17	P:GO:0006351; F:GO:0035064; P:GO:0006355; C:GO:0000788; C:GO:0005694; C:GO:0005730; C:GO:0005886; C:GO:0005720; C:GO:0005634; F:GO:0004842; P:GO:0044030; F:GO:0005515; C:GO:0070062; F:GO:0031625; C:GO:0000151; P:GO:0045892; C:GO:0005737	P:transcription, DNA-templated; F:methylated histone binding; P:regulation of transcription, DNA-templated; C:nuclear nucleosome; C:chromosome; C:nucleolus; C:plasma membrane; C:nuclear heterochromatin; C:nucleus; F:ubiquitin-protein transferase activity; P:regulation of DNA methylation; F:protein binding; C:extracellular exosome; F:ubiquitin protein ligase binding; C:ubiquitin ligase complex; P:…
AgB01_g117_t01	---NA---	115
AgB01_g118_t03	gonadotropin-releasing hormone receptor 2	281	20	1.533e-25	51.05	15	P:GO:1904066; P:GO:0007186; P:GO:0007165; P:GO:0040011; P:GO:0007200; F:GO:0004871; C:GO:0005886; F:GO:0004930; C:GO:0005887; F:GO:0008528; P:GO:0007218; P:GO:0002119; F:GO:0046982; C:GO:0016020; C:GO:0016021	P:G-protein coupled receptor signaling pathway involved in dauer larval development; P:G-protein coupled receptor signaling pathway; P:signal transduction; P:locomotion; P:phospholipase C-activating G-protein coupled receptor signaling pathway; F:signal transducer activity; C:plasma membrane; F:G-protein coupled receptor activity; C:integral component of plasma membrane; F:G-protein coupled pepti…
AgB01_g119_t01	Histamine H1 receptor	128	20	1.4063e-16	59.95	32	P:GO:0045907; P:GO:0008049; F:GO:0016907; P:GO:0007213; C:GO:0045202; P:GO:0007211; P:GO:0007612; F:GO:0001594; F:GO:0008227; C:GO:0005887; F:GO:0004930; P:GO:0006954; C:GO:0045211; P:GO:0051482; P:GO:0048245; P:GO:0030728; P:GO:0019229; P:GO:0060278; P:GO:0007186; P:GO:0007165; P:GO:0007188; P:GO:0043114; P:GO:0007200; F:GO:0004871; C:GO:0005886; P:GO:0006874; F:GO:0004989; C:GO:0016020; F:GO:00…	P:positive regulation of vasoconstriction; P:male courtship behavior; F:G-protein coupled acetylcholine receptor activity; P:G-protein coupled acetylcholine receptor signaling pathway; C:synapse; P:octopamine or tyramine signaling pathway; P:learning; F:trace-amine receptor activity; F:G-protein coupled amine receptor activity; C:integral component of plasma membrane; F:G-protein coupled receptor…
AgB01_g120_t01	octopamine receptor oamb	155	20	1.24299e-08	54.9	18	P:GO:0018108; P:GO:0007186; P:GO:0007165; P:GO:0007212; P:GO:0007267; F:GO:0004871; C:GO:0005886; F:GO:0004930; C:GO:0005887; F:GO:0004952; F:GO:0004715; F:GO:0004935; P:GO:0071880; C:GO:0016020; C:GO:0016021; P:GO:0071875; P:GO:0010579; F:GO:0016740	P:peptidyl-tyrosine phosphorylation; P:G-protein coupled receptor signaling pathway; P:signal transduction; P:dopamine receptor signaling pathway; P:cell-cell signaling; F:signal transducer activity; C:plasma membrane; F:G-protein coupled receptor activity; C:integral component of plasma membrane; F:dopamine neurotransmitter receptor activity; F:non-membrane spanning protein tyrosine kinase activ…
AgB01_g121_t03	hypothetical protein LOAG_00906	423	7	1.20656e-32	73.29
AgB01_g122_t01	---NA---	130
AgB01_g123_t20	elegans confirmed by transcript evidence	224	20	1.50107e-126	46.3	15	P:GO:0035188; F:GO:0008270; P:GO:0006351; P:GO:0009792; P:GO:0006355; F:GO:0043565; P:GO:0043401; C:GO:0005635; F:GO:0003677; C:GO:0005634; F:GO:0003700; F:GO:0046872; C:GO:0016020; C:GO:0016021; F:GO:0003707	P:hatching; F:zinc ion binding; P:transcription, DNA-templated; P:embryo development ending in birth or egg hatching; P:regulation of transcription, DNA-templated; F:sequence-specific DNA binding; P:steroid hormone mediated signaling pathway; C:nuclear envelope; F:DNA binding; C:nucleus; F:transcription factor activity, sequence-specific DNA binding; F:metal ion binding; C:membrane; C:integral co…
AgB01_g124_t01	elegans ly confirmed by transcript evidence	132	20	3.92745e-80	69.05	17	P:GO:0035188; F:GO:0008270; P:GO:0006351; P:GO:0008340; P:GO:0009792; P:GO:0042594; P:GO:0006355; F:GO:0043565; P:GO:0043401; C:GO:0005635; F:GO:0003677; C:GO:0005634; F:GO:0003700; F:GO:0046872; C:GO:0016020; C:GO:0016021; F:GO:0003707	P:hatching; F:zinc ion binding; P:transcription, DNA-templated; P:determination of adult lifespan; P:embryo development ending in birth or egg hatching; P:response to starvation; P:regulation of transcription, DNA-templated; F:sequence-specific DNA binding; P:steroid hormone mediated signaling pathway; C:nuclear envelope; F:DNA binding; C:nucleus; F:transcription factor activity, sequence-specifi…
AgB01_g125_t01	elegans ly confirmed by transcript evidence	442	20	3.76694e-146	51.8	17	P:GO:0035188; F:GO:0008270; P:GO:0006351; P:GO:0009792; P:GO:0008340; P:GO:0042594; P:GO:0006355; F:GO:0043565; P:GO:0043401; C:GO:0005635; F:GO:0003677; C:GO:0005634; F:GO:0003700; F:GO:0046872; C:GO:0016020; C:GO:0016021; F:GO:0003707	P:hatching; F:zinc ion binding; P:transcription, DNA-templated; P:embryo development ending in birth or egg hatching; P:determination of adult lifespan; P:response to starvation; P:regulation of transcription, DNA-templated; F:sequence-specific DNA binding; P:steroid hormone mediated signaling pathway; C:nuclear envelope; F:DNA binding; C:nucleus; F:transcription factor activity, sequence-specifi…
AgB01_g126_t01	trans-2-enoyl- mitochondrial	133	20	2.68114e-81	59.85	8	F:GO:0008270; F:GO:0016491; F:GO:0019166; C:GO:0005739; P:GO:0006629; P:GO:0055114; P:GO:0006633; P:GO:0006631	F:zinc ion binding; F:oxidoreductase activity; F:trans-2-enoyl-CoA reductase (NADPH) activity; C:mitochondrion; P:lipid metabolic process; P:oxidation-reduction process; P:fatty acid biosynthetic process; P:fatty acid metabolic process
AgB01_g127_t01	Cuticle collagen 6	351	20	4.61475e-142	43.5	6	F:GO:0004842; C:GO:0005581; C:GO:0016020; C:GO:0016021; F:GO:0042302; P:GO:0016567	F:ubiquitin-protein transferase activity; C:collagen trimer; C:membrane; C:integral component of membrane; F:structural constituent of cuticle; P:protein ubiquitination
AgB01_g128_t02	---NA---	43
AgB01_g129_t01	---NA---	108
AgB01_g130_t04	elegans confirmed by transcript evidence	629	20	0	61.2	16	P:GO:0046929; P:GO:0008340; P:GO:0006464; P:GO:0007155; C:GO:0045202; F:GO:0004104; C:GO:0005886; C:GO:0030425; C:GO:0005615; P:GO:0097112; C:GO:0016020; F:GO:0042043; C:GO:0016021; F:GO:0052689; C:GO:0030424; F:GO:0016787	P:negative regulation of neurotransmitter secretion; P:determination of adult lifespan; P:cellular protein modification process; P:cell adhesion; C:synapse; F:cholinesterase activity; C:plasma membrane; C:dendrite; C:extracellular space; P:gamma-aminobutyric acid receptor clustering; C:membrane; F:neurexin family protein binding; C:integral component of membrane; F:carboxylic ester hydrolase acti…
AgB01_g131_t01	elegans confirmed by transcript evidence	93	11	3.26091e-18	87.36	13	P:GO:0046929; P:GO:0008340; P:GO:0006464; P:GO:0007155; C:GO:0045202; F:GO:0004104; C:GO:0005886; C:GO:0030425; C:GO:0005615; P:GO:0097112; C:GO:0016020; C:GO:0016021; C:GO:0030424	P:negative regulation of neurotransmitter secretion; P:determination of adult lifespan; P:cellular protein modification process; P:cell adhesion; C:synapse; F:cholinesterase activity; C:plasma membrane; C:dendrite; C:extracellular space; P:gamma-aminobutyric acid receptor clustering; C:membrane; C:integral component of membrane; C:axon
AgB01_g132_t01	elegans confirmed by transcript evidence	236	20	2.21589e-128	75.25	15	P:GO:0046929; P:GO:0008340; P:GO:0006464; P:GO:0007155; C:GO:0045202; F:GO:0004104; C:GO:0005886; C:GO:0030425; C:GO:0005615; P:GO:0097112; C:GO:0016020; C:GO:0016021; F:GO:0052689; C:GO:0030424; F:GO:0016787	P:negative regulation of neurotransmitter secretion; P:determination of adult lifespan; P:cellular protein modification process; P:cell adhesion; C:synapse; F:cholinesterase activity; C:plasma membrane; C:dendrite; C:extracellular space; P:gamma-aminobutyric acid receptor clustering; C:membrane; C:integral component of membrane; F:carboxylic ester hydrolase activity; C:axon; F:hydrolase activity
AgB01_g133_t01	Nematode cuticle collagen N-terminal domain containing	283	11	2.26907e-24	52	4	C:GO:0005581; C:GO:0016020; C:GO:0016021; F:GO:0042302	C:collagen trimer; C:membrane; C:integral component of membrane; F:structural constituent of cuticle
AgB01_g134_t02	---NA---	156
AgB01_g135_t02	---NA---	156
AgB01_g136_t02	nuclear receptor NHR-1	422	20	0	56.6	11	F:GO:0003677; C:GO:0005634; F:GO:0003700; F:GO:0008270; P:GO:0019915; P:GO:0006351; F:GO:0046872; P:GO:0006355; F:GO:0003707; F:GO:0043565; P:GO:0043401	F:DNA binding; C:nucleus; F:transcription factor activity, sequence-specific DNA binding; F:zinc ion binding; P:lipid storage; P:transcription, DNA-templated; F:metal ion binding; P:regulation of transcription, DNA-templated; F:steroid hormone receptor activity; F:sequence-specific DNA binding; P:steroid hormone mediated signaling pathway
AgB01_g137_t01	---NA---	72
AgB01_g138_t01	28S ribosomal mitochondrial	266	20	0	70.75	14	P:GO:0040035; P:GO:0009792; C:GO:0005840; C:GO:0005763; P:GO:0006898; C:GO:0005622; P:GO:0000003; P:GO:0006412; F:GO:0003735; P:GO:0002119; C:GO:0005739; C:GO:0016020; C:GO:0016021; P:GO:0032543	P:hermaphrodite genitalia development; P:embryo development ending in birth or egg hatching; C:ribosome; C:mitochondrial small ribosomal subunit; P:receptor-mediated endocytosis; C:intracellular; P:reproduction; P:translation; F:structural constituent of ribosome; P:nematode larval development; C:mitochondrion; C:membrane; C:integral component of membrane; P:mitochondrial translation
AgB01_g139_t02	PRP6 pre-mRNA splicing factor 6 homolog (yeast)	257	20	1.86176e-88	57.9	30	P:GO:0008380; C:GO:0016607; P:GO:0045944; P:GO:0006468; P:GO:0006403; C:GO:0009536; P:GO:0000398; C:GO:0005654; F:GO:0000166; F:GO:0005524; P:GO:0045292; F:GO:0003723; C:GO:0071013; C:GO:0046540; C:GO:0005682; C:GO:0005681; P:GO:0006396; F:GO:0004672; P:GO:0006397; F:GO:0004674; P:GO:0000245; P:GO:0000244; F:GO:0003723; P:GO:0000375; C:GO:0005634; F:GO:0005515; F:GO:0003713; F:GO:0050681; F:GO:00…	P:RNA splicing; C:nuclear speck; P:positive regulation of transcription from RNA polymerase II promoter; P:protein phosphorylation; P:RNA localization; C:plastid; P:mRNA splicing, via spliceosome; C:nucleoplasm; F:nucleotide binding; F:ATP binding; P:mRNA cis splicing, via spliceosome; F:RNA binding; C:catalytic step 2 spliceosome; C:U4/U6 x U5 tri-snRNP complex; C:U5 snRNP; C:spliceosomal comple…
AgB01_g140_t05	Pre-mRNA-processing factor 6	556	20	0	74.2	18	P:GO:0040011; P:GO:0009792; P:GO:0006396; F:GO:0004672; F:GO:0004674; P:GO:0006468; P:GO:0006898; P:GO:0000003; P:GO:0000398; P:GO:0000244; P:GO:0040039; F:GO:0000166; C:GO:0005634; F:GO:0005524; C:GO:0071013; P:GO:0002119; C:GO:0046540; P:GO:0018996	P:locomotion; P:embryo development ending in birth or egg hatching; P:RNA processing; F:protein kinase activity; F:protein serine/threonine kinase activity; P:protein phosphorylation; P:receptor-mediated endocytosis; P:reproduction; P:mRNA splicing, via spliceosome; P:spliceosomal tri-snRNP complex assembly; P:inductive cell migration; F:nucleotide binding; C:nucleus; F:ATP binding; C:catalytic s…
AgB01_g141_t01	---NA---	144
AgB01_g142_t04	elegans ly confirmed by transcript evidence	483	20	3.31713e-108	73.8	24	C:GO:0008074; P:GO:0006182; P:GO:0016998; P:GO:0007165; P:GO:0006032; F:GO:0016849; F:GO:0016829; F:GO:0004383; F:GO:0004672; P:GO:0006468; P:GO:0007635; C:GO:0005622; F:GO:0004016; C:GO:0005886; F:GO:0000166; F:GO:0004568; F:GO:0005525; P:GO:0006935; F:GO:0005524; C:GO:0016020; C:GO:0016021; P:GO:0032026; P:GO:0035556; P:GO:0009190	C:guanylate cyclase complex, soluble; P:cGMP biosynthetic process; P:cell wall macromolecule catabolic process; P:signal transduction; P:chitin catabolic process; F:phosphorus-oxygen lyase activity; F:lyase activity; F:guanylate cyclase activity; F:protein kinase activity; P:protein phosphorylation; P:chemosensory behavior; C:intracellular; F:adenylate cyclase activity; C:plasma membrane; F:nucle…
AgB01_g143_t01	---NA---	99
AgB01_g144_t05	Cyclic AMP-dependent transcription factor ATF-6 alpha	232	1	9.72392e-65	87	3	F:GO:0003700; P:GO:0006355; F:GO:0043565	F:transcription factor activity, sequence-specific DNA binding; P:regulation of transcription, DNA-templated; F:sequence-specific DNA binding
AgB01_g145_t02	Cytochrome b5	131	20	2.15859e-77	75.2	16	P:GO:0040011; P:GO:0009792; P:GO:0045610; P:GO:0006898; F:GO:0020037; P:GO:0002168; C:GO:0005811; C:GO:0048471; F:GO:0046872; P:GO:0002119; C:GO:0016020; C:GO:0016021; P:GO:0035206; C:GO:0012505; P:GO:0051726; P:GO:0032940	P:locomotion; P:embryo development ending in birth or egg hatching; P:regulation of hemocyte differentiation; P:receptor-mediated endocytosis; F:heme binding; P:instar larval development; C:lipid particle; C:perinuclear region of cytoplasm; F:metal ion binding; P:nematode larval development; C:membrane; C:integral component of membrane; P:regulation of hemocyte proliferation; C:endomembrane syste…
AgB01_g146_t01	Golgi SNAP receptor complex member 2	221	20	1.27147e-133	69.1	21	P:GO:0061025; P:GO:0009792; P:GO:0015031; F:GO:0005484; P:GO:0006891; C:GO:0005794; C:GO:0000139; F:GO:0000149; P:GO:0042147; P:GO:0006623; P:GO:0006810; P:GO:0006896; C:GO:0005789; C:GO:0031902; P:GO:0006888; C:GO:0016020; C:GO:0012507; C:GO:0016021; C:GO:0005829; C:GO:0031201; P:GO:0048280	P:membrane fusion; P:embryo development ending in birth or egg hatching; P:protein transport; F:SNAP receptor activity; P:intra-Golgi vesicle-mediated transport; C:Golgi apparatus; C:Golgi membrane; F:SNARE binding; P:retrograde transport, endosome to Golgi; P:protein targeting to vacuole; P:transport; P:Golgi to vacuole transport; C:endoplasmic reticulum membrane; C:late endosome membrane; P:ER …
AgB01_g147_t01	pregnancy-associated plasma pappalysin 1	387	20	0	49.45	13	F:GO:0008270; F:GO:0004175; P:GO:0044267; P:GO:0007565; F:GO:0008233; C:GO:0005576; F:GO:0004222; F:GO:0008237; F:GO:0046872; P:GO:0006508; C:GO:0016020; C:GO:0016021; F:GO:0016787	F:zinc ion binding; F:endopeptidase activity; P:cellular protein metabolic process; P:female pregnancy; F:peptidase activity; C:extracellular region; F:metalloendopeptidase activity; F:metallopeptidase activity; F:metal ion binding; P:proteolysis; C:membrane; C:integral component of membrane; F:hydrolase activity
AgB01_g148_t01	elegans ly confirmed by transcript evidence	335	20	2.74554e-84	51.3	1	C:GO:0016020	C:membrane
AgB01_g149_t01	---NA---	86
AgB01_g150_t01	Integrator complex subunit 2	432	20	0	53.35	9	P:GO:0016180; F:GO:0016715; F:GO:0005507; F:GO:0003824; C:GO:0016020; C:GO:0016021; P:GO:0055114; F:GO:0004497; C:GO:0032039	P:snRNA processing; F:oxidoreductase activity, acting on paired donors, with incorporation or reduction of molecular oxygen, reduced ascorbate as one donor, and incorporation of one atom of oxygen; F:copper ion binding; F:catalytic activity; C:membrane; C:integral component of membrane; P:oxidation-reduction process; F:monooxygenase activity; C:integrator complex
AgB01_g151_t03	---NA---	464
AgB01_g152_t01	CG30118 CG30118-PB	282	20	1.0484e-138	67.85
AgB01_g153_t02	hypothetical protein LOAG_11999	103	5	1.28932e-11	74.6
AgB01_g154_t01	---NA---	93
AgB01_g155_t01	---NA---	97
AgB01_g156_t01	---NA---	101
AgB01_g157_t01	Pao retrotransposon peptidase family	105	20	5.93118e-14	68.3	5	F:GO:0003676; F:GO:0003964; F:GO:0008270; P:GO:0015074; P:GO:0006278	F:nucleic acid binding; F:RNA-directed DNA polymerase activity; F:zinc ion binding; P:DNA integration; P:RNA-dependent DNA biosynthetic process
AgB01_g158_t01	Pao retrotransposon peptidase family	357	20	2.83614e-75	57.1	7	F:GO:0000166; F:GO:0005525; F:GO:0003676; F:GO:0003964; F:GO:0008270; P:GO:0015074; P:GO:0006278	F:nucleotide binding; F:GTP binding; F:nucleic acid binding; F:RNA-directed DNA polymerase activity; F:zinc ion binding; P:DNA integration; P:RNA-dependent DNA biosynthetic process
AgB01_g159_t01	---NA---	116
AgB01_g160_t01	elegans ly confirmed by transcript evidence	200	20	8.70111e-25	49.1	8	P:GO:0005975; F:GO:0016757; P:GO:0036065; C:GO:0016020; C:GO:0016021; F:GO:0016740; P:GO:0043413; F:GO:0008107	P:carbohydrate metabolic process; F:transferase activity, transferring glycosyl groups; P:fucosylation; C:membrane; C:integral component of membrane; F:transferase activity; P:macromolecule glycosylation; F:galactoside 2-alpha-L-fucosyltransferase activity
AgB01_g161_t01	ATP-binding cassette sub-family F member 1	639	20	0	76.1	6	F:GO:0000166; F:GO:0016887; F:GO:0005524; P:GO:0040035; P:GO:0009792; P:GO:0000003	F:nucleotide binding; F:ATPase activity; F:ATP binding; P:hermaphrodite genitalia development; P:embryo development ending in birth or egg hatching; P:reproduction
AgB01_g162_t01	---NA---	154
AgB01_g163_t01	gag	328	20	4.8417e-20	47.9	2	F:GO:0003676; P:GO:0015074	F:nucleic acid binding; P:DNA integration
AgB01_g164_t01	---NA---	102
AgB01_g165_t03	Transmembrane 144	243	20	1.33249e-142	53.1	5	P:GO:0002119; P:GO:0009792; C:GO:0016020; C:GO:0016021; P:GO:0007276	P:nematode larval development; P:embryo development ending in birth or egg hatching; C:membrane; C:integral component of membrane; P:gamete generation
AgB01_g166_t02	O-phosphoseryl-tRNA(Sec) selenium transferase	126	20	1.6676e-18	60.25	11	P:GO:0097056; C:GO:0005634; F:GO:0005515; F:GO:0003723; C:GO:0005737; P:GO:0001514; F:GO:0003824; F:GO:0016740; F:GO:0000049; F:GO:0016785; P:GO:0006412	P:selenocysteinyl-tRNA(Sec) biosynthetic process; C:nucleus; F:protein binding; F:RNA binding; C:cytoplasm; P:selenocysteine incorporation; F:catalytic activity; F:transferase activity; F:tRNA binding; F:transferase activity, transferring selenium-containing groups; P:translation
AgB01_g167_t01	O-phosphoseryl-tRNA(Sec) selenium transferase	152	20	6.39024e-106	62.45	11	P:GO:0097056; C:GO:0005634; F:GO:0005515; F:GO:0003723; C:GO:0005737; F:GO:0003824; P:GO:0001514; F:GO:0016740; F:GO:0000049; F:GO:0016785; P:GO:0006412	P:selenocysteinyl-tRNA(Sec) biosynthetic process; C:nucleus; F:protein binding; F:RNA binding; C:cytoplasm; F:catalytic activity; P:selenocysteine incorporation; F:transferase activity; F:tRNA binding; F:transferase activity, transferring selenium-containing groups; P:translation
AgB01_g168_t02	Fork head domain containing	197	4	1.57738e-58	73	6	F:GO:0003677; C:GO:0005634; F:GO:0003700; P:GO:0006351; P:GO:0006355; F:GO:0043565	F:DNA binding; C:nucleus; F:transcription factor activity, sequence-specific DNA binding; P:transcription, DNA-templated; P:regulation of transcription, DNA-templated; F:sequence-specific DNA binding
AgB01_g169_t01	---NA---	118
AgB01_g170_t02	Lipase family	302	20	1.58696e-84	56.1	2	P:GO:0045132; F:GO:0016787	P:meiotic chromosome segregation; F:hydrolase activity
AgB01_g171_t01	---NA---	61
AgB01_g172_t01	Lipase family	313	20	1.25287e-87	55.4	2	P:GO:0019915; F:GO:0016787	P:lipid storage; F:hydrolase activity
AgB01_g173_t04	ribosomal L24	116	20	4.08326e-79	82.1	11	F:GO:0003735; C:GO:0030529; P:GO:0002119; P:GO:0009792; C:GO:0022625; P:GO:0000027; C:GO:0005840; P:GO:1902626; P:GO:0000003; C:GO:0005622; P:GO:0006412	F:structural constituent of ribosome; C:intracellular ribonucleoprotein complex; P:nematode larval development; P:embryo development ending in birth or egg hatching; C:cytosolic large ribosomal subunit; P:ribosomal large subunit assembly; C:ribosome; P:assembly of large subunit precursor of preribosome; P:reproduction; C:intracellular; P:translation
AgB01_g174_t02	hypothetical protein Bm1_33955	638	2	1.23521e-27	39.5
AgB01_g175_t13	Heterogeneous nuclear ribonucleo A1	345	20	5.58098e-155	87.5	16	P:GO:0040035; P:GO:0031581; P:GO:0009792; P:GO:0008340; C:GO:0005694; P:GO:0000003; P:GO:0040007; P:GO:0000398; F:GO:0000166; F:GO:0003676; C:GO:0000781; C:GO:0005634; F:GO:0003723; C:GO:0030529; P:GO:0002119; C:GO:0019013	P:hermaphrodite genitalia development; P:hemidesmosome assembly; P:embryo development ending in birth or egg hatching; P:determination of adult lifespan; C:chromosome; P:reproduction; P:growth; P:mRNA splicing, via spliceosome; F:nucleotide binding; F:nucleic acid binding; C:chromosome, telomeric region; C:nucleus; F:RNA binding; C:intracellular ribonucleoprotein complex; P:nematode larval develo…
AgB01_g176_t04	Heterogeneous nuclear ribonucleo A1	355	20	5.60558e-155	88.3	16	P:GO:0040035; P:GO:0031581; P:GO:0009792; P:GO:0008340; C:GO:0005694; P:GO:0000003; P:GO:0040007; P:GO:0000398; F:GO:0000166; F:GO:0003676; C:GO:0000781; C:GO:0005634; F:GO:0003723; C:GO:0030529; P:GO:0002119; C:GO:0019013	P:hermaphrodite genitalia development; P:hemidesmosome assembly; P:embryo development ending in birth or egg hatching; P:determination of adult lifespan; C:chromosome; P:reproduction; P:growth; P:mRNA splicing, via spliceosome; F:nucleotide binding; F:nucleic acid binding; C:chromosome, telomeric region; C:nucleus; F:RNA binding; C:intracellular ribonucleoprotein complex; P:nematode larval develo…
AgB01_g177_t01	---NA---	62
AgB01_g178_t03	hypothetical protein Bm1_21365	543	3	9.84995e-21	82.67	2	C:GO:0016020; C:GO:0016021	C:membrane; C:integral component of membrane
AgB01_g179_t01	---NA---	104
AgB01_g180_t01	---NA---	110
AgB01_g181_t01	---NA---	104
AgB01_g182_t01	hypothetical protein Bm1_53660	274	7	3.92651e-47	54.71	2	C:GO:0016020; C:GO:0016021	C:membrane; C:integral component of membrane
AgB01_g183_t04	serine threonine- kinase mos	377	20	0	56.1	16	P:GO:0007292; P:GO:0046777; P:GO:0045930; P:GO:0007147; F:GO:0004672; F:GO:0004674; P:GO:0006468; C:GO:0005622; F:GO:0000166; P:GO:0000165; F:GO:0005524; P:GO:0000186; F:GO:0004709; P:GO:0016310; F:GO:0016740; F:GO:0016301	P:female gamete generation; P:protein autophosphorylation; P:negative regulation of mitotic cell cycle; P:female meiosis II; F:protein kinase activity; F:protein serine/threonine kinase activity; P:protein phosphorylation; C:intracellular; F:nucleotide binding; P:MAPK cascade; F:ATP binding; P:activation of MAPKK activity; F:MAP kinase kinase kinase activity; P:phosphorylation; F:transferase acti…
AgB01_g184_t01	---NA---	104
AgB01_g185_t03	hypothetical protein LOAG_13322	934	8	1.83261e-23	66.13
AgB01_g186_t03	---NA---	121
AgB01_g187_t01	---NA---	104
AgB01_g188_t01	---NA---	204
AgB01_g189_t01	rophiN family member (stn-2)	521	20	0	63.85	29	P:GO:0040011; P:GO:0008582; C:GO:0008021; F:GO:0050839; F:GO:0005198; P:GO:0008049; P:GO:0008306; C:GO:0043005; P:GO:0007613; F:GO:0005524; P:GO:0009408; P:GO:0051124; F:GO:0003824; C:GO:0043195; P:GO:0071632; C:GO:0016013; P:GO:0016079; P:GO:0008355; P:GO:0048149; P:GO:0007269; C:GO:0005886; P:GO:0001654; F:GO:0008307; P:GO:0042052; C:GO:0005737; P:GO:0072553; C:GO:0044297; F:GO:0008092; C:GO:00…	P:locomotion; P:regulation of synaptic growth at neuromuscular junction; C:synaptic vesicle; F:cell adhesion molecule binding; F:structural molecule activity; P:male courtship behavior; P:associative learning; C:neuron projection; P:memory; F:ATP binding; P:response to heat; P:synaptic growth at neuromuscular junction; F:catalytic activity; C:terminal bouton; P:optomotor response; C:syntrophin co…
AgB01_g190_t01	Clc 2	245	7	0	55.43	17	P:GO:0055085; P:GO:0090136; P:GO:0034220; P:GO:0009792; F:GO:0005198; P:GO:0006821; P:GO:0006810; F:GO:0003674; P:GO:0000003; C:GO:0005886; F:GO:0005247; F:GO:0005216; C:GO:0005923; P:GO:0006811; P:GO:1903959; C:GO:0016020; C:GO:0016021	P:transmembrane transport; P:epithelial cell-cell adhesion; P:ion transmembrane transport; P:embryo development ending in birth or egg hatching; F:structural molecule activity; P:chloride transport; P:transport; F:molecular_function; P:reproduction; C:plasma membrane; F:voltage-gated chloride channel activity; F:ion channel activity; C:bicellular tight junction; P:ion transport; P:regulation of a…
AgB01_g191_t02	hypothetical protein LOAG_00388	131	1	2.37746e-10	56
AgB01_g192_t01	---NA---	164
AgB01_g193_t02	hypothetical protein LOAG_00388	152	1	4.82268e-16	55
AgB01_g194_t02	Clc 2	242	20	3.22015e-145	53.5	18	P:GO:0008150; P:GO:0055085; P:GO:0090136; P:GO:0034220; P:GO:0009792; F:GO:0005198; P:GO:0006821; P:GO:0006810; F:GO:0003674; C:GO:0005886; P:GO:0000003; F:GO:0005247; F:GO:0005216; C:GO:0005923; P:GO:1903959; P:GO:0006811; C:GO:0016020; C:GO:0016021	P:biological_process; P:transmembrane transport; P:epithelial cell-cell adhesion; P:ion transmembrane transport; P:embryo development ending in birth or egg hatching; F:structural molecule activity; P:chloride transport; P:transport; F:molecular_function; C:plasma membrane; P:reproduction; F:voltage-gated chloride channel activity; F:ion channel activity; C:bicellular tight junction; P:regulation…
AgB01_g195_t02	RNA binding	135	3	2.51409e-82	64	2	C:GO:0016020; C:GO:0016021	C:membrane; C:integral component of membrane
AgB01_g196_t01	ankyrin repeat domain	280	20	1.40277e-102	57.1	2	C:GO:0005634; C:GO:0005737	C:nucleus; C:cytoplasm
AgB01_g197_t01	Serine protease	563	20	0	60.3	12	F:GO:0008270; F:GO:0046872; P:GO:0045087; C:GO:0016020; P:GO:0006508; C:GO:0045121; C:GO:0016021; F:GO:0008236; F:GO:0004185; F:GO:0008233; F:GO:0008239; F:GO:0016787	F:zinc ion binding; F:metal ion binding; P:innate immune response; C:membrane; P:proteolysis; C:membrane raft; C:integral component of membrane; F:serine-type peptidase activity; F:serine-type carboxypeptidase activity; F:peptidase activity; F:dipeptidyl-peptidase activity; F:hydrolase activity
AgB01_g198_t01	---NA---	138
AgB01_g199_t10	THO complex subunit 7 homolog	212	20	2.23688e-117	54.75	16	P:GO:0008380; C:GO:0016607; P:GO:0009792; P:GO:0006397; C:GO:0000446; C:GO:0000347; C:GO:0000445; P:GO:0006810; P:GO:0006368; P:GO:0006406; F:GO:0003676; C:GO:0000781; C:GO:0005634; F:GO:0003723; C:GO:0005737; P:GO:0051028	P:RNA splicing; C:nuclear speck; P:embryo development ending in birth or egg hatching; P:mRNA processing; C:nucleoplasmic THO complex; C:THO complex; C:THO complex part of transcription export complex; P:transport; P:transcription elongation from RNA polymerase II promoter; P:mRNA export from nucleus; F:nucleic acid binding; C:chromosome, telomeric region; C:nucleus; F:RNA binding; C:cytoplasm; P…
AgB01_g200_t03	tyrosine phosphatase isoform CRA_a	186	20	5.89227e-139	78.6	19	P:GO:0019915; P:GO:0006470; P:GO:0043542; P:GO:1900746; C:GO:0005886; F:GO:0008138; P:GO:0043117; F:GO:0004721; C:GO:0005634; C:GO:0005768; P:GO:0007219; F:GO:0004725; C:GO:0005737; C:GO:0016020; F:GO:0016791; P:GO:0016311; P:GO:0035335; P:GO:0032940; F:GO:0016787	P:lipid storage; P:protein dephosphorylation; P:endothelial cell migration; P:regulation of vascular endothelial growth factor signaling pathway; C:plasma membrane; F:protein tyrosine/serine/threonine phosphatase activity; P:positive regulation of vascular permeability; F:phosphoprotein phosphatase activity; C:nucleus; C:endosome; P:Notch signaling pathway; F:protein tyrosine phosphatase activity…
AgB01_g201_t04	hypothetical protein LOAG_12145	254	1	1.09965e-06	59
AgB01_g202_t01	---NA---	70
AgB01_g203_t01	---NA---	100
AgB01_g204_t15	Patched domain-containing 3	981	20	0	52.95	5	C:GO:0016020; C:GO:0016021; P:GO:0018996; P:GO:0006810; F:GO:0005215	C:membrane; C:integral component of membrane; P:molting cycle, collagen and cuticulin-based cuticle; P:transport; F:transporter activity
AgB01_g205_t01	---NA---	148
AgB01_g206_t02	briggsae CBR-COL-113	321	3	1.65958e-07	37.67	4	C:GO:0005581; C:GO:0016020; C:GO:0016021; F:GO:0042302	C:collagen trimer; C:membrane; C:integral component of membrane; F:structural constituent of cuticle
AgB01_g207_t02	FLYWCH zinc finger domain containing	66	5	5.1207e-33	87.6	12	F:GO:0030170; P:GO:0019805; P:GO:0006569; P:GO:0034354; F:GO:0030429; C:GO:0005737; F:GO:0003824; P:GO:0019363; P:GO:0043420; P:GO:0009435; P:GO:0097053; F:GO:0016787	F:pyridoxal phosphate binding; P:quinolinate biosynthetic process; P:tryptophan catabolic process; P:'de novo' NAD biosynthetic process from tryptophan; F:kynureninase activity; C:cytoplasm; F:catalytic activity; P:pyridine nucleotide biosynthetic process; P:anthranilate metabolic process; P:NAD biosynthetic process; P:L-kynurenine catabolic process; F:hydrolase activity
AgB01_g208_t01	kynureninase (L-kynurenine hydrolase)	462	20	0	72.8	21	P:GO:0019805; F:GO:0030170; P:GO:0019915; F:GO:0042803; P:GO:0034354; P:GO:0034341; P:GO:0009435; P:GO:0043420; C:GO:0005654; P:GO:0097053; P:GO:0006569; C:GO:0005737; F:GO:0030429; F:GO:0003824; P:GO:0019441; C:GO:0005739; P:GO:0019363; P:GO:0019442; C:GO:0005829; P:GO:0034516; F:GO:0016787	P:quinolinate biosynthetic process; F:pyridoxal phosphate binding; P:lipid storage; F:protein homodimerization activity; P:'de novo' NAD biosynthetic process from tryptophan; P:response to interferon-gamma; P:NAD biosynthetic process; P:anthranilate metabolic process; C:nucleoplasm; P:L-kynurenine catabolic process; P:tryptophan catabolic process; C:cytoplasm; F:kynureninase activity; F:catalytic…
AgB01_g209_t02	hypothetical protein LOAG_10653	356	20	2.13084e-116	59.8	7	P:GO:0005975; C:GO:0005737; P:GO:0036065; C:GO:0016020; F:GO:0008757; F:GO:0008107; P:GO:0032259	P:carbohydrate metabolic process; C:cytoplasm; P:fucosylation; C:membrane; F:S-adenosylmethionine-dependent methyltransferase activity; F:galactoside 2-alpha-L-fucosyltransferase activity; P:methylation
AgB01_g210_t04	cyclin-dependent kinase 9	431	20	0	76.5	56	P:GO:0006281; C:GO:0016605; C:GO:0008023; F:GO:0000979; P:GO:0006282; P:GO:0060043; P:GO:0006366; C:GO:0008024; P:GO:0006367; F:GO:0001223; P:GO:0006368; F:GO:0097322; P:GO:1903839; C:GO:0043231; P:GO:0010613; P:GO:0051726; F:GO:0017069; P:GO:0050434; P:GO:2001168; F:GO:0008353; F:GO:0004672; F:GO:0004674; P:GO:0006974; P:GO:0007346; C:GO:0005634; F:GO:0005515; P:GO:0033129; P:GO:0008283; F:GO:00…	P:DNA repair; C:PML body; C:transcription elongation factor complex; F:RNA polymerase II core promoter sequence-specific DNA binding; P:regulation of DNA repair; P:regulation of cardiac muscle cell proliferation; P:transcription from RNA polymerase II promoter; C:cyclin/CDK positive transcription elongation factor complex; P:transcription initiation from RNA polymerase II promoter; F:transcriptio…
AgB01_g211_t01	---NA---	160
AgB01_g212_t04	Cuticle collagen 12	304	20	2.1828e-82	68.75	6	P:GO:0040011; C:GO:0005581; P:GO:0010171; C:GO:0016020; C:GO:0016021; F:GO:0042302	P:locomotion; C:collagen trimer; P:body morphogenesis; C:membrane; C:integral component of membrane; F:structural constituent of cuticle
AgB01_g213_t01	---NA---	113
AgB01_g214_t01	---NA---	117
AgB01_g215_t01	hypothetical protein Bm1_00600	492	4	5.42457e-50	68.5
AgB01_g216_t01	uncharacterized conserved	193	20	9.14805e-49	56.4	9	F:GO:0000166; F:GO:0003676; P:GO:0042407; C:GO:0005739; C:GO:0016020; C:GO:0016021; C:GO:0061617; C:GO:0005741; C:GO:0005743	F:nucleotide binding; F:nucleic acid binding; P:cristae formation; C:mitochondrion; C:membrane; C:integral component of membrane; C:MICOS complex; C:mitochondrial outer membrane; C:mitochondrial inner membrane
AgB01_g217_t02	Histone acetyltransferase MYST1	552	20	0	74.55	30	F:GO:0016746; F:GO:0016747; F:GO:0016407; F:GO:0035064; P:GO:0043981; F:GO:0046972; P:GO:0043982; C:GO:0000776; C:GO:0005694; P:GO:0043984; C:GO:0005654; P:GO:0045892; C:GO:0072487; P:GO:0045893; P:GO:0016573; C:GO:0071339; P:GO:0006351; P:GO:0006355; F:GO:0008134; F:GO:0043996; F:GO:0043995; C:GO:0000123; C:GO:0005634; F:GO:0004402; F:GO:0005515; F:GO:0046872; P:GO:0010506; P:GO:0030099; F:GO:00…	F:transferase activity, transferring acyl groups; F:transferase activity, transferring acyl groups other than amino-acyl groups; F:acetyltransferase activity; F:methylated histone binding; P:histone H4-K5 acetylation; F:histone acetyltransferase activity (H4-K16 specific); P:histone H4-K8 acetylation; C:kinetochore; C:chromosome; P:histone H4-K16 acetylation; C:nucleoplasm; P:negative regulation …
AgB01_g218_t01	Disintegrin and metallo ase domain-containing 19	658	20	7.87987e-137	55.6	13	F:GO:0016504; F:GO:0008270; F:GO:0008233; C:GO:0005576; F:GO:0004222; F:GO:0008237; P:GO:0007229; F:GO:0046872; P:GO:0006508; C:GO:0016020; C:GO:0016021; P:GO:0010952; F:GO:0016787	F:peptidase activator activity; F:zinc ion binding; F:peptidase activity; C:extracellular region; F:metalloendopeptidase activity; F:metallopeptidase activity; P:integrin-mediated signaling pathway; F:metal ion binding; P:proteolysis; C:membrane; C:integral component of membrane; P:positive regulation of peptidase activity; F:hydrolase activity
AgB01_g219_t01	ADF-1 L-ORF	272	20	5.57232e-93	52.5	15	P:GO:0040011; P:GO:0008345; P:GO:0008355; P:GO:0045944; P:GO:0007613; P:GO:0048813; P:GO:0007611; P:GO:0050773; P:GO:0007616; F:GO:0003677; C:GO:0005634; F:GO:0001077; P:GO:0007416; C:GO:0005705; P:GO:0045893	P:locomotion; P:larval locomotory behavior; P:olfactory learning; P:positive regulation of transcription from RNA polymerase II promoter; P:memory; P:dendrite morphogenesis; P:learning or memory; P:regulation of dendrite development; P:long-term memory; F:DNA binding; C:nucleus; F:transcriptional activator activity, RNA polymerase II core promoter proximal region sequence-specific binding; P:syna…
AgB01_g220_t01	---NA---	84
AgB01_g221_t03	domain containing	244	20	8.27266e-133	64.7	1	P:GO:0009792	P:embryo development ending in birth or egg hatching
AgB01_g222_t01	---NA---	68
AgB01_g223_t04	FMRFamide receptor	599	20	4.0861e-116	45	9	F:GO:0019825; F:GO:0004930; P:GO:0007186; P:GO:0007165; C:GO:0016020; C:GO:0016021; P:GO:0018991; F:GO:0004871; F:GO:0020037	F:oxygen binding; F:G-protein coupled receptor activity; P:G-protein coupled receptor signaling pathway; P:signal transduction; C:membrane; C:integral component of membrane; P:oviposition; F:signal transducer activity; F:heme binding
AgB01_g224_t01	---NA---	109
AgB01_g225_t02	Aspartyl protease inhibitor	259	20	1.08771e-17	45.7	7	F:GO:0030414; F:GO:0019828; P:GO:0006508; P:GO:0010951; F:GO:0008233; C:GO:0005576; P:GO:0010466	F:peptidase inhibitor activity; F:aspartic-type endopeptidase inhibitor activity; P:proteolysis; P:negative regulation of endopeptidase activity; F:peptidase activity; C:extracellular region; P:negative regulation of peptidase activity
AgB01_g226_t06	Kinesin KIF11	982	20	0	63.75	27	P:GO:0007051; P:GO:0007059; C:GO:0005871; P:GO:0007018; C:GO:0005874; P:GO:0051301; F:GO:0000166; P:GO:0051225; F:GO:0005524; C:GO:0072686; F:GO:0032403; F:GO:0019901; C:GO:0000922; P:GO:0007067; P:GO:0007100; F:GO:0008574; P:GO:0007049; P:GO:0046602; F:GO:0008017; C:GO:0005876; F:GO:0003777; C:GO:0005813; C:GO:0005856; C:GO:0005737; C:GO:0016020; C:GO:0005819; P:GO:0090307	P:spindle organization; P:chromosome segregation; C:kinesin complex; P:microtubule-based movement; C:microtubule; P:cell division; F:nucleotide binding; P:spindle assembly; F:ATP binding; C:mitotic spindle; F:protein complex binding; F:protein kinase binding; C:spindle pole; P:mitotic nuclear division; P:mitotic centrosome separation; F:ATP-dependent microtubule motor activity, plus-end-directed;…
AgB01_g227_t01	---NA---	115
AgB01_g228_t02	Tau-tubulin kinase 1	288	20	0	63.7	9	F:GO:0000166; F:GO:0005524; C:GO:0005737; C:GO:0005819; F:GO:0004672; P:GO:0016310; F:GO:0004674; P:GO:0006468; F:GO:0016301	F:nucleotide binding; F:ATP binding; C:cytoplasm; C:spindle; F:protein kinase activity; P:phosphorylation; F:protein serine/threonine kinase activity; P:protein phosphorylation; F:kinase activity
AgB01_g229_t01	Tau-tubulin kinase 1	191	20	4.29959e-125	61.6	12	F:GO:0000166; P:GO:0008360; F:GO:0005524; C:GO:0005634; C:GO:0005737; C:GO:0005819; F:GO:0004672; P:GO:0016310; F:GO:0004674; P:GO:0018105; P:GO:0006468; F:GO:0016301	F:nucleotide binding; P:regulation of cell shape; F:ATP binding; C:nucleus; C:cytoplasm; C:spindle; F:protein kinase activity; P:phosphorylation; F:protein serine/threonine kinase activity; P:peptidyl-serine phosphorylation; P:protein phosphorylation; F:kinase activity
AgB01_g230_t04	hypothetical protein LOAG_09940	213	1	2.28602e-07	65
AgB01_g231_t01	hypothetical protein LOAG_09940	164	1	4.40654e-08	57
AgB01_g232_t01	---NA---	72
AgB01_g233_t05	---NA---	227
AgB01_g234_t01	---NA---	148
AgB01_g235_t01	---NA---	98
AgB01_g236_t01	---NA---	120
AgB01_g237_t03	---NA---	120
AgB01_g238_t04	---NA---	156
AgB01_g239_t01	---NA---	207
AgB01_g240_t04	hypothetical protein LOAG_04419	448	2	2.66558e-45	76
AgB01_g241_t01	Proto-oncogene serine threonine- kinase pim-1	399	20	2.09234e-148	63.2	39	P:GO:0008283; P:GO:0007275; P:GO:0008285; P:GO:0043123; F:GO:0043024; P:GO:0046777; F:GO:0004683; P:GO:0009615; P:GO:0006468; P:GO:0032091; P:GO:0031659; F:GO:0000166; F:GO:0005524; P:GO:0008637; P:GO:0045893; P:GO:0070561; P:GO:0006915; P:GO:0000082; F:GO:0030145; P:GO:0016310; P:GO:0016239; F:GO:0004672; P:GO:0043433; F:GO:0008134; F:GO:0004674; P:GO:0007346; P:GO:0007049; C:GO:0005886; P:GO:00…	P:cell proliferation; P:multicellular organism development; P:negative regulation of cell proliferation; P:positive regulation of I-kappaB kinase/NF-kappaB signaling; F:ribosomal small subunit binding; P:protein autophosphorylation; F:calmodulin-dependent protein kinase activity; P:response to virus; P:protein phosphorylation; P:negative regulation of protein binding; P:positive regulation of cyc…
AgB01_g242_t02	hypothetical protein Bm1_21365	232	3	4.32691e-17	65.67	2	C:GO:0016020; C:GO:0016021	C:membrane; C:integral component of membrane
AgB01_g243_t01	---NA---	124
AgB01_g244_t01	---NA---	66
AgB01_g245_t03	---NA---	163
AgB01_g246_t02	small subunit ribosomal 21	84	20	2.78659e-55	90.35	13	C:GO:0022627; P:GO:0009792; P:GO:0000447; C:GO:0005840; P:GO:0000003; C:GO:0005622; P:GO:0006412; P:GO:0000461; P:GO:0008406; F:GO:0003735; C:GO:0030529; P:GO:0002119; P:GO:0018996	C:cytosolic small ribosomal subunit; P:embryo development ending in birth or egg hatching; P:endonucleolytic cleavage in ITS1 to separate SSU-rRNA from 5.8S rRNA and LSU-rRNA from tricistronic rRNA transcript (SSU-rRNA, 5.8S rRNA, LSU-rRNA); C:ribosome; P:reproduction; C:intracellular; P:translation; P:endonucleolytic cleavage to generate mature 3'-end of SSU-rRNA from (SSU-rRNA, 5.8S rRNA, LSU-r…
AgB01_g247_t01	---NA---	162
AgB01_g248_t01	Nanos homolog 2	797	20	1.34599e-11	60	20	F:GO:0008270; P:GO:0044838; P:GO:1900153; P:GO:0007275; P:GO:0007283; C:GO:0000932; P:GO:0006402; P:GO:0045835; P:GO:0006417; C:GO:0005634; F:GO:0005515; F:GO:0003723; C:GO:0048471; C:GO:0005737; F:GO:0046872; P:GO:0030718; C:GO:0043186; P:GO:0030154; F:GO:0003729; P:GO:0017148	F:zinc ion binding; P:cell quiescence; P:positive regulation of nuclear-transcribed mRNA catabolic process, deadenylation-dependent decay; P:multicellular organism development; P:spermatogenesis; C:P-body; P:mRNA catabolic process; P:negative regulation of meiotic nuclear division; P:regulation of translation; C:nucleus; F:protein binding; F:RNA binding; C:perinuclear region of cytoplasm; C:cytop…
AgB01_g249_t01	---NA---	97
AgB01_g250_t01	---NA---	101
AgB01_g251_t03	tubulin beta-2C chain	442	20	0	93.05	25	P:GO:0040035; P:GO:0040011; P:GO:0009792; C:GO:0043025; C:GO:0043005; P:GO:0040018; P:GO:0009612; C:GO:0005874; P:GO:0007017; F:GO:0005525; F:GO:0000166; C:GO:0005623; P:GO:0001764; P:GO:0002119; F:GO:0003924; P:GO:0050974; F:GO:0005200; P:GO:0000003; P:GO:0040007; P:GO:0007638; C:GO:0005634; C:GO:0005856; F:GO:0005515; C:GO:0005737; P:GO:0031122	P:hermaphrodite genitalia development; P:locomotion; P:embryo development ending in birth or egg hatching; C:neuronal cell body; C:neuron projection; P:positive regulation of multicellular organism growth; P:response to mechanical stimulus; C:microtubule; P:microtubule-based process; F:GTP binding; F:nucleotide binding; C:cell; P:neuron migration; P:nematode larval development; F:GTPase activity;…
AgB01_g252_t02	Tubulin beta-2C chain	452	20	0	94.25	12	F:GO:0005525; F:GO:0000166; C:GO:0005879; C:GO:0005856; P:GO:0007010; C:GO:0005737; F:GO:0003924; P:GO:0009792; P:GO:0007067; F:GO:0005200; C:GO:0005874; P:GO:0007017	F:GTP binding; F:nucleotide binding; C:axonemal microtubule; C:cytoskeleton; P:cytoskeleton organization; C:cytoplasm; F:GTPase activity; P:embryo development ending in birth or egg hatching; P:mitotic nuclear division; F:structural constituent of cytoskeleton; C:microtubule; P:microtubule-based process
AgB01_g253_t01	---NA---	104
AgB01_g254_t01	hypothetical protein LOAG_03603	852	3	4.68782e-69	46.67
AgB01_g255_t01	---NA---	162
AgB01_g256_t04	ABC transporter family	1089	20	0	64.45	9	F:GO:0000166; F:GO:0016887; F:GO:0005524; F:GO:0042626; P:GO:0055085; C:GO:0016020; C:GO:0016021; P:GO:0093002; P:GO:0006810	F:nucleotide binding; F:ATPase activity; F:ATP binding; F:ATPase activity, coupled to transmembrane movement of substances; P:transmembrane transport; C:membrane; C:integral component of membrane; P:response to nematicide; P:transport
AgB01_g257_t05	5 -AMP-activated kinase subunit gamma-2	447	20	0	66.45	26	F:GO:0016208; F:GO:0030295; F:GO:0008603; P:GO:0006469; F:GO:0004862; F:GO:0000166; F:GO:0005524; F:GO:0004679; F:GO:0003824; P:GO:0050790; P:GO:0016310; P:GO:0035556; F:GO:0019901; P:GO:0006110; F:GO:0043531; P:GO:0006633; P:GO:0006631; F:GO:0008607; C:GO:0005615; P:GO:0005977; P:GO:0045860; P:GO:0006629; P:GO:0010800; F:GO:0016301; P:GO:0019217; C:GO:0031588	F:AMP binding; F:protein kinase activator activity; F:cAMP-dependent protein kinase regulator activity; P:negative regulation of protein kinase activity; F:cAMP-dependent protein kinase inhibitor activity; F:nucleotide binding; F:ATP binding; F:AMP-activated protein kinase activity; F:catalytic activity; P:regulation of catalytic activity; P:phosphorylation; P:intracellular signal transduction; F…
AgB01_g258_t06	Hypothetical kDa in chromosome	413	20	0	52.5	6	C:GO:0005739; F:GO:0008168; F:GO:0016740; P:GO:0006898; P:GO:0000003; P:GO:0032259	C:mitochondrion; F:methyltransferase activity; F:transferase activity; P:receptor-mediated endocytosis; P:reproduction; P:methylation
AgB01_g259_t01	---NA---	129
AgB01_g260_t01	---NA---	182
AgB01_g261_t06	hypothetical protein LOAG_12810	206	3	2.43978e-53	70.33	2	C:GO:0016020; C:GO:0016021	C:membrane; C:integral component of membrane
AgB01_g262_t06	Hypothetical protein CBG16845	373	4	4.00358e-20	42
AgB01_g263_t03	---NA---	246
AgB01_g264_t01	---NA---	197
AgB01_g265_t03	Ral GEF with PH domain and SH3 binding motif 1	587	20	0	52.2	11	C:GO:0005737; P:GO:0007264; F:GO:0005085; C:GO:0016020; P:GO:0032485; F:GO:0008321; C:GO:0005575; P:GO:0035556; P:GO:0043547; C:GO:0005622; C:GO:0005886	C:cytoplasm; P:small GTPase mediated signal transduction; F:guanyl-nucleotide exchange factor activity; C:membrane; P:regulation of Ral protein signal transduction; F:Ral guanyl-nucleotide exchange factor activity; C:cellular_component; P:intracellular signal transduction; P:positive regulation of GTPase activity; C:intracellular; C:plasma membrane
AgB01_g266_t02	ral guanine nucleotide exchange factor	92	20	1.15036e-50	69.95	7	P:GO:0007264; F:GO:0005085; P:GO:0032485; F:GO:0008321; C:GO:0005575; P:GO:0043547; C:GO:0005622	P:small GTPase mediated signal transduction; F:guanyl-nucleotide exchange factor activity; P:regulation of Ral protein signal transduction; F:Ral guanyl-nucleotide exchange factor activity; C:cellular_component; P:positive regulation of GTPase activity; C:intracellular
AgB01_g267_t03	cathepsin B-like cysteine ase	75	1	2.68578e-18	97	4	P:GO:0006508; F:GO:0008234; F:GO:0008233; F:GO:0016787	P:proteolysis; F:cysteine-type peptidase activity; F:peptidase activity; F:hydrolase activity
AgB01_g268_t02	cathepsin B-like cysteine ase	74	20	4.67438e-46	87.75	8	C:GO:0005615; P:GO:0006508; F:GO:0004197; F:GO:0008234; F:GO:0008233; P:GO:0051603; C:GO:0005764; F:GO:0016787	C:extracellular space; P:proteolysis; F:cysteine-type endopeptidase activity; F:cysteine-type peptidase activity; F:peptidase activity; P:proteolysis involved in cellular protein catabolic process; C:lysosome; F:hydrolase activity
AgB01_g269_t01	cathepsin B-like cysteine ase	303	20	0	77.65	15	P:GO:0040011; P:GO:0009792; F:GO:0004197; F:GO:0008234; F:GO:0008233; P:GO:0006898; C:GO:0005764; C:GO:0005615; P:GO:0002119; P:GO:0006508; P:GO:0050790; C:GO:0016020; C:GO:0016021; P:GO:0051603; F:GO:0016787	P:locomotion; P:embryo development ending in birth or egg hatching; F:cysteine-type endopeptidase activity; F:cysteine-type peptidase activity; F:peptidase activity; P:receptor-mediated endocytosis; C:lysosome; C:extracellular space; P:nematode larval development; P:proteolysis; P:regulation of catalytic activity; C:membrane; C:integral component of membrane; P:proteolysis involved in cellular pr…
AgB01_g270_t01	---NA---	51
AgB01_g271_t02	glutathione transferase	210	20	2.17932e-155	67.25	7	F:GO:0005515; P:GO:0050829; P:GO:0045087; P:GO:0008152; F:GO:0004364; F:GO:0016740; C:GO:0005575	F:protein binding; P:defense response to Gram-negative bacterium; P:innate immune response; P:metabolic process; F:glutathione transferase activity; F:transferase activity; C:cellular_component
AgB01_g272_t02	glutathione transferase	209	20	5.2431e-122	76.45	7	F:GO:0005515; P:GO:0050829; P:GO:0045087; P:GO:0008152; F:GO:0004364; F:GO:0016740; C:GO:0005575	F:protein binding; P:defense response to Gram-negative bacterium; P:innate immune response; P:metabolic process; F:glutathione transferase activity; F:transferase activity; C:cellular_component
AgB01_g273_t03	hypothetical protein Bm1_21365	373	3	2.54349e-11	66	2	C:GO:0016020; C:GO:0016021	C:membrane; C:integral component of membrane
AgB01_g274_t01	MBT domain-containing 1	441	20	2.26978e-169	60.15	8	P:GO:0016569; C:GO:0005634; F:GO:0008270; P:GO:0006351; F:GO:0046872; P:GO:0006355; P:GO:0048706; F:GO:0003674	P:covalent chromatin modification; C:nucleus; F:zinc ion binding; P:transcription, DNA-templated; F:metal ion binding; P:regulation of transcription, DNA-templated; P:embryonic skeletal system development; F:molecular_function
AgB01_g275_t01	mbt repeat family	114	4	1.39797e-66	73	2	C:GO:0005634; P:GO:0006355	C:nucleus; P:regulation of transcription, DNA-templated
AgB01_g276_t01	Saposin-like type region 1 family	146	6	1.77854e-13	56.33	9	F:GO:0001664; C:GO:0005737; P:GO:0043085; C:GO:0016020; P:GO:0006629; C:GO:0016021; F:GO:0008047; C:GO:0005764; P:GO:0006665	F:G-protein coupled receptor binding; C:cytoplasm; P:positive regulation of catalytic activity; C:membrane; P:lipid metabolic process; C:integral component of membrane; F:enzyme activator activity; C:lysosome; P:sphingolipid metabolic process
AgB01_g277_t01	---NA---	641
AgB01_g278_t01	---NA---	70
AgB01_g279_t01	---NA---	149
AgB01_g280_t01	---NA---	149
AgB01_g281_t03	acyl binding	149	20	1.10492e-108	67.9	15	P:GO:0019915; P:GO:0007032; C:GO:0030173; F:GO:0008289; P:GO:0006810; P:GO:0032504; C:GO:0045177; C:GO:0045178; F:GO:0000062; C:GO:0016020; C:GO:0016021; C:GO:0055038; C:GO:0031303; P:GO:0032456; P:GO:0016049	P:lipid storage; P:endosome organization; C:integral component of Golgi membrane; F:lipid binding; P:transport; P:multicellular organism reproduction; C:apical part of cell; C:basal part of cell; F:fatty-acyl-CoA binding; C:membrane; C:integral component of membrane; C:recycling endosome membrane; C:integral component of endosome membrane; P:endocytic recycling; P:cell growth
AgB01_g282_t02	---NA---	116
AgB01_g283_t06	Aminopeptidase-like 1	281	20	0	74	14	P:GO:0019538; F:GO:0042802; F:GO:0008235; F:GO:0004177; F:GO:0008233; P:GO:0040009; C:GO:0005622; C:GO:0005634; P:GO:0046662; C:GO:0005737; F:GO:0046872; P:GO:0006508; F:GO:0030145; F:GO:0016787	P:protein metabolic process; F:identical protein binding; F:metalloexopeptidase activity; F:aminopeptidase activity; F:peptidase activity; P:regulation of growth rate; C:intracellular; C:nucleus; P:regulation of oviposition; C:cytoplasm; F:metal ion binding; P:proteolysis; F:manganese ion binding; F:hydrolase activity
AgB01_g284_t01	aminopeptidase-like 1	177	20	6.03394e-90	64.05	15	P:GO:0019538; P:GO:0008150; F:GO:0042802; F:GO:0008235; F:GO:0004177; F:GO:0008233; P:GO:0040009; C:GO:0005622; C:GO:0005634; P:GO:0046662; C:GO:0005737; F:GO:0046872; P:GO:0006508; F:GO:0030145; F:GO:0016787	P:protein metabolic process; P:biological_process; F:identical protein binding; F:metalloexopeptidase activity; F:aminopeptidase activity; F:peptidase activity; P:regulation of growth rate; C:intracellular; C:nucleus; P:regulation of oviposition; C:cytoplasm; F:metal ion binding; P:proteolysis; F:manganese ion binding; F:hydrolase activity
AgB01_g285_t03	mitochondrial succinyl- ligase [ADP-forming] subunit beta	436	20	0	80.9	17	C:GO:0043209; P:GO:0008152; P:GO:0006099; P:GO:0006781; P:GO:0006105; F:GO:0004775; F:GO:0004774; P:GO:0006104; F:GO:0000166; F:GO:0005524; F:GO:0005515; C:GO:0070062; C:GO:0005759; F:GO:0046872; F:GO:0003824; C:GO:0005739; F:GO:0016874	C:myelin sheath; P:metabolic process; P:tricarboxylic acid cycle; P:succinyl-CoA pathway; P:succinate metabolic process; F:succinate-CoA ligase (ADP-forming) activity; F:succinate-CoA ligase activity; P:succinyl-CoA metabolic process; F:nucleotide binding; F:ATP binding; F:protein binding; C:extracellular exosome; C:mitochondrial matrix; F:metal ion binding; F:catalytic activity; C:mitochondrion;…
AgB01_g286_t02	---NA---	66
AgB01_g287_t01	---NA---	69
AgB01_g288_t01	---NA---	105
AgB01_g289_t01	elegans ly confirmed by transcript evidence	163	20	9.00323e-105	63.45	7	C:GO:0005615; P:GO:0008152; C:GO:0016020; C:GO:0016021; F:GO:0052689; F:GO:0004104; F:GO:0016787	C:extracellular space; P:metabolic process; C:membrane; C:integral component of membrane; F:carboxylic ester hydrolase activity; F:cholinesterase activity; F:hydrolase activity
AgB01_g290_t07	hypothetical protein LOAG_12476	281	6	5.13359e-63	58	3	P:GO:0009792; C:GO:0016020; C:GO:0016021	P:embryo development ending in birth or egg hatching; C:membrane; C:integral component of membrane
AgB01_g291_t02	hypothetical protein LOAG_04511	163	1	5.4095e-09	58
AgB01_g292_t03	zinc DHHC-type containing 24	356	20	0	54.9	7	F:GO:0016746; F:GO:0019706; F:GO:0008270; F:GO:0046872; C:GO:0016020; C:GO:0016021; F:GO:0016740	F:transferase activity, transferring acyl groups; F:protein-cysteine S-palmitoyltransferase activity; F:zinc ion binding; F:metal ion binding; C:membrane; C:integral component of membrane; F:transferase activity
AgB01_g293_t01	nad dehydrogenase	162	20	9.85964e-112	76.1	4	C:GO:0005737; F:GO:0016491; C:GO:0005739; P:GO:0055114	C:cytoplasm; F:oxidoreductase activity; C:mitochondrion; P:oxidation-reduction process
AgB01_g294_t01	---NA---	65
AgB01_g295_t02	hypothetical protein LOAG_12476	389	6	8.5982e-63	51.17	3	P:GO:0009792; C:GO:0016020; C:GO:0016021	P:embryo development ending in birth or egg hatching; C:membrane; C:integral component of membrane
AgB01_g296_t07	Sulfhydryl oxidase 1	546	20	0	62.15	16	P:GO:0040011; C:GO:0030173; P:GO:0045454; P:GO:0006457; C:GO:0005623; C:GO:0005615; C:GO:0045171; C:GO:0070062; F:GO:0003756; F:GO:0016491; C:GO:0016020; C:GO:0016021; P:GO:0016242; P:GO:0055114; F:GO:0016971; F:GO:0016972	P:locomotion; C:integral component of Golgi membrane; P:cell redox homeostasis; P:protein folding; C:cell; C:extracellular space; C:intercellular bridge; C:extracellular exosome; F:protein disulfide isomerase activity; F:oxidoreductase activity; C:membrane; C:integral component of membrane; P:negative regulation of macroautophagy; P:oxidation-reduction process; F:flavin-linked sulfhydryl oxidase …
AgB01_g297_t04	DNA repair	460	20	0	54.1	17	F:GO:0016788; P:GO:0006281; P:GO:0090305; P:GO:0006295; P:GO:0006289; P:GO:0006366; P:GO:0006974; F:GO:0000014; C:GO:0000112; F:GO:0003697; F:GO:0003677; C:GO:0005634; F:GO:0003824; F:GO:0046872; F:GO:0004519; F:GO:0004518; F:GO:0016787	F:hydrolase activity, acting on ester bonds; P:DNA repair; P:nucleic acid phosphodiester bond hydrolysis; P:nucleotide-excision repair, DNA incision, 3'-to lesion; P:nucleotide-excision repair; P:transcription from RNA polymerase II promoter; P:cellular response to DNA damage stimulus; F:single-stranded DNA endodeoxyribonuclease activity; C:nucleotide-excision repair factor 3 complex; F:single-st…
AgB01_g298_t01	E3 ubiquitin- ligase TRIP12	1115	20	0	61.3	18	P:GO:0009790; P:GO:0006281; F:GO:0008270; P:GO:2000780; P:GO:0000209; P:GO:0006974; P:GO:1901315; P:GO:0042787; C:GO:0005654; F:GO:0046966; C:GO:0005634; F:GO:0004842; F:GO:0005515; C:GO:0005737; C:GO:0005829; F:GO:0016740; F:GO:0016874; P:GO:0016567	P:embryo development; P:DNA repair; F:zinc ion binding; P:negative regulation of double-strand break repair; P:protein polyubiquitination; P:cellular response to DNA damage stimulus; P:negative regulation of histone H2A K63-linked ubiquitination; P:protein ubiquitination involved in ubiquitin-dependent protein catabolic process; C:nucleoplasm; F:thyroid hormone receptor binding; C:nucleus; F:ubiq…
AgB01_g299_t01	ATP-dependent RNA helicase DDX3X	199	3	1.15571e-66	69	5	F:GO:0000166; F:GO:0003676; F:GO:0005524; F:GO:0004386; F:GO:0016787	F:nucleotide binding; F:nucleic acid binding; F:ATP binding; F:helicase activity; F:hydrolase activity
AgB01_g300_t01	ATP-dependent RNA helicase An3	496	20	0	82.55	23	P:GO:0007281; C:GO:0036464; C:GO:0010494; P:GO:0040035; P:GO:0008340; P:GO:0009792; P:GO:0040020; P:GO:0007059; F:GO:0004386; P:GO:0006413; P:GO:0042006; P:GO:0042127; F:GO:0004004; F:GO:0000166; F:GO:0003676; F:GO:0005524; C:GO:0005737; P:GO:0002119; C:GO:0043186; P:GO:0010468; P:GO:0010501; P:GO:0032502; F:GO:0016787	P:germ cell development; C:cytoplasmic ribonucleoprotein granule; C:cytoplasmic stress granule; P:hermaphrodite genitalia development; P:determination of adult lifespan; P:embryo development ending in birth or egg hatching; P:regulation of meiotic nuclear division; P:chromosome segregation; F:helicase activity; P:translational initiation; P:masculinization of hermaphroditic germ-line; P:regulatio…
AgB01_g301_t01	motile sperm domain containing 1	218	20	1.06278e-158	60.35	9	P:GO:0000122; P:GO:0008150; C:GO:0005634; C:GO:0048471; C:GO:0005737; C:GO:0016020; C:GO:0016021; P:GO:0045944; F:GO:0003674	P:negative regulation of transcription from RNA polymerase II promoter; P:biological_process; C:nucleus; C:perinuclear region of cytoplasm; C:cytoplasm; C:membrane; C:integral component of membrane; P:positive regulation of transcription from RNA polymerase II promoter; F:molecular_function
AgB01_g302_t01	Trehalase	532	20	0	65.45	12	F:GO:0003824; P:GO:0002119; P:GO:0009792; P:GO:0008152; C:GO:0016020; C:GO:0045121; C:GO:0016021; P:GO:0005991; P:GO:0005993; F:GO:0004555; F:GO:0016798; F:GO:0016787	F:catalytic activity; P:nematode larval development; P:embryo development ending in birth or egg hatching; P:metabolic process; C:membrane; C:membrane raft; C:integral component of membrane; P:trehalose metabolic process; P:trehalose catabolic process; F:alpha,alpha-trehalase activity; F:hydrolase activity, acting on glycosyl bonds; F:hydrolase activity
AgB01_g303_t03	Trehalase	260	20	0	67.75	12	F:GO:0003824; P:GO:0002119; P:GO:0009792; P:GO:0008152; C:GO:0045121; C:GO:0016020; C:GO:0016021; P:GO:0005991; P:GO:0005993; F:GO:0004555; F:GO:0016787; F:GO:0016798	F:catalytic activity; P:nematode larval development; P:embryo development ending in birth or egg hatching; P:metabolic process; C:membrane raft; C:membrane; C:integral component of membrane; P:trehalose metabolic process; P:trehalose catabolic process; F:alpha,alpha-trehalase activity; F:hydrolase activity; F:hydrolase activity, acting on glycosyl bonds
AgB01_g304_t02	Dual specificity catalytic domain containing	227	20	7.49498e-160	71.65	12	F:GO:0004725; C:GO:0005737; C:GO:0055120; P:GO:0008340; P:GO:0006470; C:GO:0016020; F:GO:0016791; C:GO:0016021; P:GO:0016311; P:GO:0035335; F:GO:0008138; F:GO:0016787	F:protein tyrosine phosphatase activity; C:cytoplasm; C:striated muscle dense body; P:determination of adult lifespan; P:protein dephosphorylation; C:membrane; F:phosphatase activity; C:integral component of membrane; P:dephosphorylation; P:peptidyl-tyrosine dephosphorylation; F:protein tyrosine/serine/threonine phosphatase activity; F:hydrolase activity
AgB01_g305_t03	neuronal calcium sensor 1	191	20	1.68068e-134	91.25	35	C:GO:0014069; C:GO:0005794; C:GO:0043025; C:GO:0045202; F:GO:0008427; P:GO:0006469; P:GO:0007635; P:GO:0045921; F:GO:0000287; P:GO:0006935; C:GO:0030425; C:GO:0070062; C:GO:0045211; F:GO:0005509; C:GO:0043231; P:GO:0070588; C:GO:0005829; C:GO:0031410; P:GO:0010975; C:GO:0030424; F:GO:0019901; P:GO:0060872; P:GO:0050806; F:GO:0005245; C:GO:0005886; C:GO:0048471; F:GO:0005515; F:GO:0046872; P:GO:00…	C:postsynaptic density; C:Golgi apparatus; C:neuronal cell body; C:synapse; F:calcium-dependent protein kinase inhibitor activity; P:negative regulation of protein kinase activity; P:chemosensory behavior; P:positive regulation of exocytosis; F:magnesium ion binding; P:chemotaxis; C:dendrite; C:extracellular exosome; C:postsynaptic membrane; F:calcium ion binding; C:intracellular membrane-bounded…
AgB01_g306_t06	death inducer-obliterator 1	1552	20	0	46.9	10	C:GO:0005634; F:GO:0008270; C:GO:0005856; C:GO:0005737; F:GO:0046872; P:GO:0006351; P:GO:0006915; C:GO:0005819; P:GO:0097190; F:GO:0003723	C:nucleus; F:zinc ion binding; C:cytoskeleton; C:cytoplasm; F:metal ion binding; P:transcription, DNA-templated; P:apoptotic process; C:spindle; P:apoptotic signaling pathway; F:RNA binding
AgB01_g307_t01	CRAL-TRIO domain-containing	83	16	3.63055e-17	68.69	3	C:GO:0016021; P:GO:0018991; P:GO:0006810	C:integral component of membrane; P:oviposition; P:transport
AgB01_g308_t01	CRAL TRIO domain containing	211	10	1.65652e-19	45.2	2	C:GO:0016021; P:GO:0006810	C:integral component of membrane; P:transport
AgB01_g309_t01	---NA---	108
AgB01_g310_t03	39S ribosomal L12	123	7	5.41496e-54	74.57	6	F:GO:0003735; P:GO:0002119; P:GO:0008340; C:GO:0005840; C:GO:0005622; P:GO:0006412	F:structural constituent of ribosome; P:nematode larval development; P:determination of adult lifespan; C:ribosome; C:intracellular; P:translation
AgB01_g311_t01	Zinc finger 706	107	20	3.76839e-49	80.9	2	P:GO:0008150; F:GO:0046872	P:biological_process; F:metal ion binding
AgB01_g312_t01	P40	346	20	5.70862e-167	62.15	2	F:GO:0046872; P:GO:0009792	F:metal ion binding; P:embryo development ending in birth or egg hatching
AgB01_g313_t01	---NA---	111
AgB01_g314_t04	Hypothetical kDa in HEM2-OCH1 intergenic	369	20	0	66.75	8	F:GO:0003854; F:GO:0050662; F:GO:0016616; F:GO:0003824; F:GO:0016491; F:GO:0045552; P:GO:0055114; P:GO:0006694	F:3-beta-hydroxy-delta5-steroid dehydrogenase activity; F:coenzyme binding; F:oxidoreductase activity, acting on the CH-OH group of donors, NAD or NADP as acceptor; F:catalytic activity; F:oxidoreductase activity; F:dihydrokaempferol 4-reductase activity; P:oxidation-reduction process; P:steroid biosynthetic process
AgB01_g315_t01	hypothetical protein CAEBREN_13031	206	2	6.74037e-10	81	2	C:GO:0016020; C:GO:0016021	C:membrane; C:integral component of membrane
AgB01_g316_t01	fibrinogen C domain-containing 1-like	450	20	0	58.3	7	F:GO:0004435; P:GO:0007165; C:GO:0016020; P:GO:0006629; C:GO:0016021; P:GO:0035556; C:GO:0005622	F:phosphatidylinositol phospholipase C activity; P:signal transduction; C:membrane; P:lipid metabolic process; C:integral component of membrane; P:intracellular signal transduction; C:intracellular
AgB01_g317_t03	---NA---	450
AgB01_g318_t03	---NA---	167
AgB01_g319_t01	---NA---	121
AgB01_g320_t01	Integrase core domain containing	189	20	1.33347e-16	58.45	3	F:GO:0003676; F:GO:0008270; P:GO:0015074	F:nucleic acid binding; F:zinc ion binding; P:DNA integration
AgB01_g321_t03	Chondroitin proteoglycan 2	387	9	1.69735e-15	63.33	3	F:GO:0008061; P:GO:0006030; C:GO:0005576	F:chitin binding; P:chitin metabolic process; C:extracellular region
AgB01_g322_t03	Chondroitin proteoglycan 2	316	9	3.7981e-17	63.89	3	F:GO:0008061; P:GO:0006030; C:GO:0005576	F:chitin binding; P:chitin metabolic process; C:extracellular region
AgB01_g323_t01	hypothetical protein LOAG_00809	151	1	1.47897e-11	58	2	C:GO:0016020; C:GO:0016021	C:membrane; C:integral component of membrane
AgB01_g324_t01	hypothetical protein LOAG_13347	176	3	3.71073e-16	54.67	4	F:GO:0004930; P:GO:0007186; C:GO:0016020; C:GO:0016021	F:G-protein coupled receptor activity; P:G-protein coupled receptor signaling pathway; C:membrane; C:integral component of membrane
AgB01_g325_t03	tumor endothelial marker 7	491	20	0	60.9	2	C:GO:0016020; C:GO:0016021	C:membrane; C:integral component of membrane
AgB01_g326_t01	---NA---	96
AgB01_g327_t02	---NA---	220
AgB01_g328_t01	hypothetical protein Bm1_02545	128	2	8.26347e-10	80
AgB01_g329_t03	hypothetical protein LOAG_06336	248	2	4.2087e-15	42.5
AgB01_g330_t02	Long-chain-fatty-acid-- ligase 5	673	20	0	72.65	13	P:GO:0008152; C:GO:0005783; C:GO:0005730; C:GO:0005743; F:GO:0004467; C:GO:0005634; P:GO:0001676; F:GO:0003824; C:GO:0005739; C:GO:0016020; C:GO:0016021; P:GO:2001236; F:GO:0016874	P:metabolic process; C:endoplasmic reticulum; C:nucleolus; C:mitochondrial inner membrane; F:long-chain fatty acid-CoA ligase activity; C:nucleus; P:long-chain fatty acid metabolic process; F:catalytic activity; C:mitochondrion; C:membrane; C:integral component of membrane; P:regulation of extrinsic apoptotic signaling pathway; F:ligase activity
AgB01_g331_t01	---NA---	78
AgB01_g332_t01	---NA---	61
AgB01_g333_t01	mitochondrial carnitine acylcarnitine carrier CACL-like	344	20	0	67.5	11	P:GO:0006844; P:GO:0055085; F:GO:0003735; C:GO:0005739; C:GO:0016020; C:GO:0016021; P:GO:1902616; P:GO:0006810; F:GO:0015227; C:GO:0005743; P:GO:0006412	P:acyl carnitine transport; P:transmembrane transport; F:structural constituent of ribosome; C:mitochondrion; C:membrane; C:integral component of membrane; P:acyl carnitine transmembrane transport; P:transport; F:acyl carnitine transmembrane transporter activity; C:mitochondrial inner membrane; P:translation
AgB01_g334_t04	elegans confirmed by transcript evidence	308	7	1.20533e-67	53	2	P:GO:0040035; P:GO:0040011	P:hermaphrodite genitalia development; P:locomotion
AgB01_g335_t02	---NA---	173
AgB01_g336_t01	---NA---	115
AgB01_g337_t01	Methylmalonyl- mutase	196	20	7.66411e-109	61.6	15	F:GO:0016866; P:GO:0008152; P:GO:0009791; F:GO:0004494; F:GO:0047548; F:GO:0072341; C:GO:0005759; F:GO:0003824; F:GO:0046872; F:GO:0031419; C:GO:0005739; C:GO:0016020; C:GO:0016021; P:GO:0050667; F:GO:0016853	F:intramolecular transferase activity; P:metabolic process; P:post-embryonic development; F:methylmalonyl-CoA mutase activity; F:2-methyleneglutarate mutase activity; F:modified amino acid binding; C:mitochondrial matrix; F:catalytic activity; F:metal ion binding; F:cobalamin binding; C:mitochondrion; C:membrane; C:integral component of membrane; P:homocysteine metabolic process; F:isomerase acti…
AgB01_g338_t01	midA mitochondrial-like	512	20	0	66.65	6	F:GO:0035243; P:GO:0043009; C:GO:0005739; P:GO:0019918; P:GO:0046034; P:GO:0032981	F:protein-arginine omega-N symmetric methyltransferase activity; P:chordate embryonic development; C:mitochondrion; P:peptidyl-arginine methylation, to symmetrical-dimethyl arginine; P:ATP metabolic process; P:mitochondrial respiratory chain complex I assembly
AgB01_g339_t02	Calreticulin	328	20	9.39835e-134	78.2	17	P:GO:0048609; P:GO:0031581; P:GO:0040011; C:GO:0005783; F:GO:0051082; P:GO:0006457; P:GO:0045471; C:GO:0005788; P:GO:0009408; C:GO:0005737; P:GO:0030968; F:GO:0046872; F:GO:0005509; P:GO:0010468; F:GO:0030246; P:GO:0030421; P:GO:0012501	P:multicellular organismal reproductive process; P:hemidesmosome assembly; P:locomotion; C:endoplasmic reticulum; F:unfolded protein binding; P:protein folding; P:response to ethanol; C:endoplasmic reticulum lumen; P:response to heat; C:cytoplasm; P:endoplasmic reticulum unfolded protein response; F:metal ion binding; F:calcium ion binding; P:regulation of gene expression; F:carbohydrate binding;…
AgB01_g340_t01	innexin 13	368	20	0	60.4	19	P:GO:1900073; P:GO:0055085; P:GO:0040035; P:GO:0040011; F:GO:0055077; F:GO:0005243; P:GO:0006810; C:GO:0005886; P:GO:0000003; C:GO:0005622; C:GO:0005921; P:GO:0006811; P:GO:2000746; P:GO:0002119; C:GO:0016020; C:GO:0016021; P:GO:0071688; C:GO:0030054; P:GO:0019722	P:regulation of neuromuscular synaptic transmission; P:transmembrane transport; P:hermaphrodite genitalia development; P:locomotion; F:gap junction hemi-channel activity; F:gap junction channel activity; P:transport; C:plasma membrane; P:reproduction; C:intracellular; C:gap junction; P:ion transport; P:regulation of defecation rhythm; P:nematode larval development; C:membrane; C:integral componen…
AgB01_g341_t01	---NA---	52
AgB01_g342_t01	Serpin B10	108	20	2.03185e-24	63.95	8	C:GO:0005634; F:GO:0004867; C:GO:0005615; C:GO:0005737; P:GO:0010951; P:GO:0098779; P:GO:0002230; P:GO:0098792	C:nucleus; F:serine-type endopeptidase inhibitor activity; C:extracellular space; C:cytoplasm; P:negative regulation of endopeptidase activity; P:positive regulation of macromitophagy in response to mitochondrial depolarization; P:positive regulation of defense response to virus by host; P:xenophagy
AgB01_g343_t01	serine protease inhibitor	111	20	3.31056e-23	58.9	6	F:GO:0004867; C:GO:0005615; P:GO:0006508; P:GO:0010951; F:GO:0008233; F:GO:0016740	F:serine-type endopeptidase inhibitor activity; C:extracellular space; P:proteolysis; P:negative regulation of endopeptidase activity; F:peptidase activity; F:transferase activity
AgB01_g344_t01	---NA---	122
AgB01_g345_t01	---NA---	128
AgB01_g346_t03	---NA---	317
AgB01_g347_t07	Chromatin-remodeling complex ATPase chain Iswi	1078	20	0	79.35	42	F:GO:0016887; P:GO:0016569; P:GO:0040035; P:GO:0007275; P:GO:0008340; P:GO:0009792; F:GO:0004386; P:GO:0045944; C:GO:0005730; C:GO:0005677; P:GO:0006302; F:GO:0000166; F:GO:0005524; P:GO:0006338; P:GO:0002119; P:GO:0045893; P:GO:0000183; C:GO:0031213; P:GO:0040027; P:GO:0040026; P:GO:0006351; C:GO:0031010; F:GO:0031491; F:GO:0016818; C:GO:0043596; P:GO:0006355; P:GO:0006333; P:GO:0006352; P:GO:00…	F:ATPase activity; P:covalent chromatin modification; P:hermaphrodite genitalia development; P:multicellular organism development; P:determination of adult lifespan; P:embryo development ending in birth or egg hatching; F:helicase activity; P:positive regulation of transcription from RNA polymerase II promoter; C:nucleolus; C:chromatin silencing complex; P:double-strand break repair; F:nucleotide…
AgB01_g348_t01	---NA---	111
AgB01_g349_t04	Copper-transporting ATPase 2	828	20	0	74.1	29	P:GO:0060003; P:GO:0040011; P:GO:0008340; P:GO:0009792; F:GO:0005375; C:GO:0005774; P:GO:0007413; F:GO:0000166; C:GO:0005887; C:GO:0005802; P:GO:0006812; P:GO:0006878; F:GO:0005507; P:GO:0002119; P:GO:0098655; P:GO:0070588; P:GO:0010038; P:GO:0030001; P:GO:0035434; F:GO:0019829; P:GO:0046688; F:GO:0005388; P:GO:0006825; C:GO:0048471; F:GO:0004008; F:GO:0046872; C:GO:0016020; C:GO:0016021; F:GO:00…	P:copper ion export; P:locomotion; P:determination of adult lifespan; P:embryo development ending in birth or egg hatching; F:copper ion transmembrane transporter activity; C:vacuolar membrane; P:axonal fasciculation; F:nucleotide binding; C:integral component of plasma membrane; C:trans-Golgi network; P:cation transport; P:cellular copper ion homeostasis; F:copper ion binding; P:nematode larval …
AgB01_g350_t01	26S proteasome non-ATPase regulatory subunit 14	167	20	9.57969e-117	87.45	3	P:GO:0001878; C:GO:0000502; C:GO:0005575	P:response to yeast; C:proteasome complex; C:cellular_component
AgB01_g351_t02	elegans ly confirmed by transcript evidence	596	20	0	50.55	11	F:GO:0005525; F:GO:0000166; P:GO:0034260; F:GO:0005515; F:GO:0005095; P:GO:0007165; P:GO:0006915; P:GO:0007266; F:GO:0017048; F:GO:0017049; C:GO:0005622	F:GTP binding; F:nucleotide binding; P:negative regulation of GTPase activity; F:protein binding; F:GTPase inhibitor activity; P:signal transduction; P:apoptotic process; P:Rho protein signal transduction; F:Rho GTPase binding; F:GTP-Rho binding; C:intracellular
AgB01_g352_t01	upstream activation factor subunit spp27-like	272	20	2.75721e-67	65	12	F:GO:0003677; P:GO:0090305; C:GO:0005634; P:GO:0006351; F:GO:0005509; P:GO:0009792; F:GO:0004518; F:GO:0008134; C:GO:0005730; P:GO:0006259; F:GO:0003674; P:GO:0090307	F:DNA binding; P:nucleic acid phosphodiester bond hydrolysis; C:nucleus; P:transcription, DNA-templated; F:calcium ion binding; P:embryo development ending in birth or egg hatching; F:nuclease activity; F:transcription factor binding; C:nucleolus; P:DNA metabolic process; F:molecular_function; P:mitotic spindle assembly
AgB01_g353_t02	disks large-associated	624	20	3.9649e-18	48.15	2	P:GO:0019915; P:GO:0023052	P:lipid storage; P:signaling
AgB01_g354_t04	phosphoglucomutase 2	595	20	0	70.55	13	F:GO:0016868; P:GO:0009792; F:GO:0008973; P:GO:0006006; F:GO:0000287; P:GO:0005975; C:GO:0005634; F:GO:0004614; C:GO:0070062; F:GO:0046872; P:GO:0002119; C:GO:0005829; P:GO:0071704	F:intramolecular transferase activity, phosphotransferases; P:embryo development ending in birth or egg hatching; F:phosphopentomutase activity; P:glucose metabolic process; F:magnesium ion binding; P:carbohydrate metabolic process; C:nucleus; F:phosphoglucomutase activity; C:extracellular exosome; F:metal ion binding; P:nematode larval development; C:cytosol; P:organic substance metabolic process
AgB01_g355_t05	nuclear transport factor 2-like export factor 2	131	20	5.95661e-94	62.65	17	P:GO:0008150; P:GO:0040035; P:GO:0040011; P:GO:0009792; P:GO:0015031; P:GO:0043652; P:GO:0006810; P:GO:0006898; C:GO:0005622; P:GO:0000003; C:GO:0005654; C:GO:0005634; F:GO:0005515; C:GO:0048471; C:GO:0005737; P:GO:0002119; P:GO:0051028	P:biological_process; P:hermaphrodite genitalia development; P:locomotion; P:embryo development ending in birth or egg hatching; P:protein transport; P:engulfment of apoptotic cell; P:transport; P:receptor-mediated endocytosis; C:intracellular; P:reproduction; C:nucleoplasm; C:nucleus; F:protein binding; C:perinuclear region of cytoplasm; C:cytoplasm; P:nematode larval development; P:mRNA transpo…
AgB01_g356_t05	S-adenosylhomocysteine hydrolase	437	20	0	85.25	15	P:GO:0033353; P:GO:0040011; P:GO:0009792; P:GO:0010171; F:GO:0004013; P:GO:0006898; P:GO:0006730; F:GO:0051287; P:GO:0002119; C:GO:0016020; C:GO:0016021; C:GO:0005829; P:GO:0019510; P:GO:0032940; F:GO:0016787	P:S-adenosylmethionine cycle; P:locomotion; P:embryo development ending in birth or egg hatching; P:body morphogenesis; F:adenosylhomocysteinase activity; P:receptor-mediated endocytosis; P:one-carbon metabolic process; F:NAD binding; P:nematode larval development; C:membrane; C:integral component of membrane; C:cytosol; P:S-adenosylhomocysteine catabolic process; P:secretion by cell; F:hydrolase…
AgB01_g357_t02	Translation initiation factor eIF-2B subunit alpha	311	20	0	71.15	10	F:GO:0003743; P:GO:0019509; F:GO:0005085; F:GO:0046523; C:GO:0005851; P:GO:0006446; P:GO:0006413; P:GO:0044237; P:GO:0043547; P:GO:0006412	F:translation initiation factor activity; P:L-methionine salvage from methylthioadenosine; F:guanyl-nucleotide exchange factor activity; F:S-methyl-5-thioribose-1-phosphate isomerase activity; C:eukaryotic translation initiation factor 2B complex; P:regulation of translational initiation; P:translational initiation; P:cellular metabolic process; P:positive regulation of GTPase activity; P:transla…
AgB01_g358_t01	Translation initiation factor eIF-2B subunit alpha	120	20	1.29101e-33	73.05	9	F:GO:0003743; P:GO:0019509; F:GO:0005085; F:GO:0046523; C:GO:0005851; P:GO:0006446; P:GO:0006413; P:GO:0044237; P:GO:0043547	F:translation initiation factor activity; P:L-methionine salvage from methylthioadenosine; F:guanyl-nucleotide exchange factor activity; F:S-methyl-5-thioribose-1-phosphate isomerase activity; C:eukaryotic translation initiation factor 2B complex; P:regulation of translational initiation; P:translational initiation; P:cellular metabolic process; P:positive regulation of GTPase activity
AgB01_g359_t01	---NA---	101
AgB01_g360_t03	phosphatase methylesterase 1	329	20	0	67.4	41	F:GO:0080030; F:GO:0080031; F:GO:0043905; P:GO:0006482; F:GO:0080032; F:GO:0034892; F:GO:0043907; F:GO:0035460; P:GO:0009792; P:GO:0008340; F:GO:0043906; C:GO:0005575; F:GO:0004620; F:GO:0003824; P:GO:0002119; F:GO:0050253; F:GO:0047376; F:GO:0043908; F:GO:0016298; P:GO:0043666; F:GO:0051723; F:GO:0018732; F:GO:0018731; F:GO:0051721; F:GO:0018734; F:GO:0051722; F:GO:0019888; F:GO:0018733; F:GO:00…	F:methyl indole-3-acetate esterase activity; F:methyl salicylate esterase activity; F:Ser-tRNA(Thr) hydrolase activity; P:protein demethylation; F:methyl jasmonate esterase activity; F:endosulfan lactone lactonase activity; F:Cys-tRNA(Pro) hydrolase activity; F:L-ascorbate 6-phosphate lactonase activity; P:embryo development ending in birth or egg hatching; P:determination of adult lifespan; F:Al…
AgB01_g361_t01	---NA---	103
AgB01_g362_t04	SET domain containing	265	20	3.97964e-179	67.2	26	P:GO:0016569; F:GO:0043565; F:GO:0008168; C:GO:0005694; P:GO:0045944; C:GO:0005654; P:GO:0051321; P:GO:0034968; P:GO:0060903; P:GO:0016571; F:GO:0042800; P:GO:0006351; P:GO:0007283; P:GO:0006311; P:GO:0006355; C:GO:0005622; F:GO:0003676; C:GO:0005634; F:GO:0046872; P:GO:0010845; C:GO:0016020; C:GO:0016021; F:GO:0018024; F:GO:0010844; F:GO:0016740; P:GO:0032259	P:covalent chromatin modification; F:sequence-specific DNA binding; F:methyltransferase activity; C:chromosome; P:positive regulation of transcription from RNA polymerase II promoter; C:nucleoplasm; P:meiotic cell cycle; P:histone lysine methylation; P:positive regulation of meiosis I; P:histone methylation; F:histone methyltransferase activity (H3-K4 specific); P:transcription, DNA-templated; P:…
AgB01_g363_t02	---NA---	134
AgB01_g364_t04	Organic cation transporter	113	20	1.51792e-15	52.15	11	C:GO:0005887; P:GO:0055085; P:GO:0015695; F:GO:0022857; C:GO:0016020; C:GO:0016021; F:GO:0005275; P:GO:0015837; F:GO:0005215; F:GO:0015226; P:GO:1902603	C:integral component of plasma membrane; P:transmembrane transport; P:organic cation transport; F:transmembrane transporter activity; C:membrane; C:integral component of membrane; F:amine transmembrane transporter activity; P:amine transport; F:transporter activity; F:carnitine transmembrane transporter activity; P:carnitine transmembrane transport
AgB01_g365_t02	UNCoordinated family member (unc-49)	485	20	1.90415e-151	60	22	P:GO:0007165; P:GO:1902476; P:GO:0034220; F:GO:0004890; F:GO:0005230; P:GO:0043058; F:GO:0005254; C:GO:0045202; P:GO:0006810; P:GO:0006821; P:GO:0007214; C:GO:0005886; F:GO:0005216; P:GO:0006811; F:GO:0005515; P:GO:0007626; C:GO:0098794; C:GO:0045211; C:GO:0016020; C:GO:0016021; C:GO:0030054; C:GO:0031594	P:signal transduction; P:chloride transmembrane transport; P:ion transmembrane transport; F:GABA-A receptor activity; F:extracellular ligand-gated ion channel activity; P:regulation of backward locomotion; F:chloride channel activity; C:synapse; P:transport; P:chloride transport; P:gamma-aminobutyric acid signaling pathway; C:plasma membrane; F:ion channel activity; P:ion transport; F:protein bin…
AgB01_g366_t01	UNCoordinated family member (unc-49)	207	20	8.63657e-89	80.65	22	P:GO:0007165; P:GO:1902476; P:GO:0034220; F:GO:0004890; F:GO:0005230; P:GO:0043058; F:GO:0005254; C:GO:0045202; P:GO:0006810; P:GO:0006821; P:GO:0007214; C:GO:0005886; F:GO:0005216; P:GO:0006811; F:GO:0005515; P:GO:0007626; C:GO:0098794; C:GO:0045211; C:GO:0016020; C:GO:0016021; C:GO:0030054; C:GO:0031594	P:signal transduction; P:chloride transmembrane transport; P:ion transmembrane transport; F:GABA-A receptor activity; F:extracellular ligand-gated ion channel activity; P:regulation of backward locomotion; F:chloride channel activity; C:synapse; P:transport; P:chloride transport; P:gamma-aminobutyric acid signaling pathway; C:plasma membrane; F:ion channel activity; P:ion transport; F:protein bin…
AgB01_g367_t01	UNCoordinated family member (unc-49)	94	12	2.38401e-21	85.75	22	P:GO:0007165; P:GO:1902476; P:GO:0034220; F:GO:0004890; F:GO:0005230; F:GO:0005254; P:GO:0043058; C:GO:0045202; P:GO:0006821; P:GO:0006810; P:GO:0007214; C:GO:0005886; F:GO:0005216; P:GO:0006811; F:GO:0005515; P:GO:0007626; C:GO:0098794; C:GO:0045211; C:GO:0016020; C:GO:0016021; C:GO:0030054; C:GO:0031594	P:signal transduction; P:chloride transmembrane transport; P:ion transmembrane transport; F:GABA-A receptor activity; F:extracellular ligand-gated ion channel activity; F:chloride channel activity; P:regulation of backward locomotion; C:synapse; P:chloride transport; P:transport; P:gamma-aminobutyric acid signaling pathway; C:plasma membrane; F:ion channel activity; P:ion transport; F:protein bin…
AgB01_g368_t03	GDP-fucose O-fucosyltransferase 2	1005	16	6.80937e-139	48.94	11	F:GO:0003677; F:GO:0003887; F:GO:0016757; P:GO:0040035; P:GO:0006351; P:GO:0002119; P:GO:0009792; P:GO:0071897; F:GO:0016740; P:GO:0006898; P:GO:0000003	F:DNA binding; F:DNA-directed DNA polymerase activity; F:transferase activity, transferring glycosyl groups; P:hermaphrodite genitalia development; P:transcription, DNA-templated; P:nematode larval development; P:embryo development ending in birth or egg hatching; P:DNA biosynthetic process; F:transferase activity; P:receptor-mediated endocytosis; P:reproduction
AgB01_g369_t03	ribosomal RNA small subunit methyltransferase NEP1-like	231	20	1.1599e-153	77.55	19	C:GO:0032040; P:GO:0009792; P:GO:0042254; F:GO:0008168; P:GO:0006364; C:GO:0005730; P:GO:0000003; F:GO:0003723; P:GO:0000462; C:GO:0005634; F:GO:0003723; P:GO:0070475; P:GO:0002119; P:GO:0001824; F:GO:0070037; F:GO:0016740; F:GO:0019843; P:GO:0017126; P:GO:0032259	C:small-subunit processome; P:embryo development ending in birth or egg hatching; P:ribosome biogenesis; F:methyltransferase activity; P:rRNA processing; C:nucleolus; P:reproduction; F:RNA binding; P:maturation of SSU-rRNA from tricistronic rRNA transcript (SSU-rRNA, 5.8S rRNA, LSU-rRNA); C:nucleus; F:RNA binding; P:rRNA base methylation; P:nematode larval development; P:blastocyst development; F…
AgB01_g370_t01	---NA---	103
AgB01_g371_t01	---NA---	217
AgB01_g372_t01	Arf-GAP with ANK repeat and PH domain-containing 3	840	20	0	77.55	25	C:GO:0016605; F:GO:0005096; P:GO:0015031; P:GO:0043547; F:GO:0005525; F:GO:0000166; F:GO:0003924; P:GO:0000060; P:GO:0034644; P:GO:0007264; P:GO:0007165; F:GO:0031593; F:GO:0005543; P:GO:0006810; C:GO:0005622; C:GO:0005634; P:GO:0043161; F:GO:0046872; C:GO:0005737; P:GO:0043087; C:GO:0016020; P:GO:0072375; P:GO:0034614; P:GO:0030578; C:GO:0071944	C:PML body; F:GTPase activator activity; P:protein transport; P:positive regulation of GTPase activity; F:GTP binding; F:nucleotide binding; F:GTPase activity; P:protein import into nucleus, translocation; P:cellular response to UV; P:small GTPase mediated signal transduction; P:signal transduction; F:polyubiquitin binding; F:phospholipid binding; P:transport; C:intracellular; C:nucleus; P:protea…
AgB01_g373_t01	---NA---	227
AgB01_g374_t01	---NA---	254
AgB01_g375_t02	S-phase kinase-associated 1	182	20	9.99077e-107	63.25	31	F:GO:0061630; P:GO:0038095; C:GO:0005654; P:GO:0002223; C:GO:0070062; P:GO:0000086; P:GO:0035518; C:GO:0031519; F:GO:0097602; C:GO:0005829; P:GO:0016055; C:GO:0019005; P:GO:0016310; P:GO:0050852; P:GO:0051403; P:GO:0000209; P:GO:0038061; F:GO:0008013; P:GO:0006511; F:GO:0004842; C:GO:0005634; P:GO:0043161; C:GO:0005813; F:GO:0005515; C:GO:0005737; P:GO:0031146; P:GO:0051437; F:GO:0016301; P:GO:00…	F:ubiquitin protein ligase activity; P:Fc-epsilon receptor signaling pathway; C:nucleoplasm; P:stimulatory C-type lectin receptor signaling pathway; C:extracellular exosome; P:G2/M transition of mitotic cell cycle; P:histone H2A monoubiquitination; C:PcG protein complex; F:cullin family protein binding; C:cytosol; P:Wnt signaling pathway; C:SCF ubiquitin ligase complex; P:phosphorylation; P:T cel…
AgB01_g376_t01	---NA---	320
AgB01_g377_t01	---NA---	414
AgB01_g378_t06	Neuropeptide receptor 15	359	20	0	56.25	17	F:GO:0008188; P:GO:0007186; P:GO:0007165; F:GO:0005000; P:GO:0007188; P:GO:0051281; P:GO:0007200; F:GO:0004871; C:GO:0005886; F:GO:0004983; F:GO:0004930; C:GO:0005887; F:GO:0004966; P:GO:0007218; C:GO:0005737; C:GO:0016020; C:GO:0016021	F:neuropeptide receptor activity; P:G-protein coupled receptor signaling pathway; P:signal transduction; F:vasopressin receptor activity; P:adenylate cyclase-modulating G-protein coupled receptor signaling pathway; P:positive regulation of release of sequestered calcium ion into cytosol; P:phospholipase C-activating G-protein coupled receptor signaling pathway; F:signal transducer activity; C:pla…
AgB01_g379_t07	hypothetical protein LOAG_08967	180	2	8.64292e-28	46.5
AgB01_g380_t03	Bestrophin family	482	20	0	72.85	12	C:GO:0034707; C:GO:0005887; P:GO:0006811; P:GO:1902476; P:GO:0040011; C:GO:0016020; C:GO:0016021; F:GO:0005254; P:GO:0006810; P:GO:0006821; C:GO:0005886; P:GO:0040018	C:chloride channel complex; C:integral component of plasma membrane; P:ion transport; P:chloride transmembrane transport; P:locomotion; C:membrane; C:integral component of membrane; F:chloride channel activity; P:transport; P:chloride transport; C:plasma membrane; P:positive regulation of multicellular organism growth
AgB01_g381_t02	Unknown	242	9	1.22878e-156	60.22	20	P:GO:0007281; P:GO:0045948; P:GO:0006351; P:GO:0009792; P:GO:0006360; C:GO:0000932; P:GO:0060213; P:GO:0006898; P:GO:0006367; P:GO:0000003; C:GO:0005665; F:GO:0003697; C:GO:0005736; F:GO:0003899; F:GO:0001054; P:GO:0008406; P:GO:0002119; F:GO:0003727; P:GO:0000291; F:GO:0031369	P:germ cell development; P:positive regulation of translational initiation; P:transcription, DNA-templated; P:embryo development ending in birth or egg hatching; P:transcription from RNA polymerase I promoter; C:P-body; P:positive regulation of nuclear-transcribed mRNA poly(A) tail shortening; P:receptor-mediated endocytosis; P:transcription initiation from RNA polymerase II promoter; P:reproduct…
AgB01_g382_t02	elegans ly confirmed by transcript evidence	409	20	2.0481e-77	60.75	3	F:GO:0008375; C:GO:0016020; C:GO:0016021	F:acetylglucosaminyltransferase activity; C:membrane; C:integral component of membrane
AgB01_g383_t01	E3 ubiquitin- ligase UBR3	116	20	8.88778e-63	64.85	17	P:GO:0009790; F:GO:0061630; F:GO:0008270; P:GO:0042048; P:GO:0006511; F:GO:0004842; C:GO:0000151; P:GO:0071596; C:GO:0005737; F:GO:0046872; P:GO:0001701; P:GO:0001967; P:GO:0007608; C:GO:0016020; C:GO:0016021; F:GO:0016874; P:GO:0016567	P:embryo development; F:ubiquitin protein ligase activity; F:zinc ion binding; P:olfactory behavior; P:ubiquitin-dependent protein catabolic process; F:ubiquitin-protein transferase activity; C:ubiquitin ligase complex; P:ubiquitin-dependent protein catabolic process via the N-end rule pathway; C:cytoplasm; F:metal ion binding; P:in utero embryonic development; P:suckling behavior; P:sensory perc…
AgB01_g384_t10	Formin Homology 2 Domain containing	1086	20	0	64.6	18	F:GO:0008270; P:GO:0000413; C:GO:0005884; P:GO:0006457; F:GO:0008017; F:GO:0008237; F:GO:0004842; F:GO:0003755; F:GO:0003779; P:GO:0045010; C:GO:0016020; P:GO:0006508; P:GO:0016043; C:GO:0016021; F:GO:0017048; P:GO:0030036; F:GO:0016853; P:GO:0016567	F:zinc ion binding; P:protein peptidyl-prolyl isomerization; C:actin filament; P:protein folding; F:microtubule binding; F:metallopeptidase activity; F:ubiquitin-protein transferase activity; F:peptidyl-prolyl cis-trans isomerase activity; F:actin binding; P:actin nucleation; C:membrane; P:proteolysis; P:cellular component organization; C:integral component of membrane; F:Rho GTPase binding; P:ac…
AgB01_g385_t01	---NA---	149
AgB01_g386_t01	PH domain and leucine rich repeat phosphatase-like	538	20	0	52.95	22	P:GO:0043408; P:GO:0006470; P:GO:0042981; P:GO:1900744; C:GO:0042622; C:GO:0005886; P:GO:0046328; F:GO:0004722; C:GO:0005634; F:GO:0004721; F:GO:0005515; P:GO:0002667; P:GO:0009649; C:GO:0005737; F:GO:0003824; F:GO:0046872; C:GO:0016020; P:GO:0006915; C:GO:0005829; C:GO:0001917; P:GO:0051898; F:GO:0016787	P:regulation of MAPK cascade; P:protein dephosphorylation; P:regulation of apoptotic process; P:regulation of p38MAPK cascade; C:photoreceptor outer segment membrane; C:plasma membrane; P:regulation of JNK cascade; F:protein serine/threonine phosphatase activity; C:nucleus; F:phosphoprotein phosphatase activity; F:protein binding; P:regulation of T cell anergy; P:entrainment of circadian clock; C…
AgB01_g387_t04	Low affinity immunoglobulin epsilon Fc receptor	159	20	2.05668e-115	51.15	12	C:GO:0070062; P:GO:0051770; P:GO:0051000; F:GO:0046872; C:GO:0016020; P:GO:0002925; C:GO:0016021; C:GO:0009897; F:GO:0019863; F:GO:0030246; P:GO:0051712; C:GO:0005886	C:extracellular exosome; P:positive regulation of nitric-oxide synthase biosynthetic process; P:positive regulation of nitric-oxide synthase activity; F:metal ion binding; C:membrane; P:positive regulation of humoral immune response mediated by circulating immunoglobulin; C:integral component of membrane; C:external side of plasma membrane; F:IgE binding; F:carbohydrate binding; P:positive regula…
AgB01_g388_t01	hypothetical protein LOAG_02392	211	2	2.95429e-15	48
AgB01_g389_t01	nucleoporin seh1	376	20	0	69.25	39	C:GO:0031080; P:GO:0016925; P:GO:0007077; P:GO:0034198; P:GO:1900034; P:GO:0015031; P:GO:0007059; C:GO:0000777; C:GO:0000776; C:GO:0005694; C:GO:0000775; F:GO:0003674; P:GO:0051301; P:GO:0019083; P:GO:0034629; P:GO:0002534; P:GO:0006999; P:GO:0075733; P:GO:0016032; C:GO:0005829; P:GO:0032008; P:GO:0051028; P:GO:0050830; P:GO:0007062; P:GO:1904263; P:GO:0007067; P:GO:0006810; P:GO:0007049; C:GO:00…	C:nuclear pore outer ring; P:protein sumoylation; P:mitotic nuclear envelope disassembly; P:cellular response to amino acid starvation; P:regulation of cellular response to heat; P:protein transport; P:chromosome segregation; C:condensed chromosome kinetochore; C:kinetochore; C:chromosome; C:chromosome, centromeric region; F:molecular_function; P:cell division; P:viral transcription; P:cellular p…
AgB01_g390_t01	---NA---	104
AgB01_g391_t01	---NA---	116
AgB01_g392_t01	Small G signaling modulator 1	278	20	1.37324e-145	49.05	17	P:GO:0090630; F:GO:0005096; C:GO:0005794; C:GO:0005576; P:GO:0006886; P:GO:0045944; C:GO:0005622; C:GO:0030659; P:GO:0031338; F:GO:0005515; C:GO:0005737; C:GO:0016020; C:GO:0005829; C:GO:0031410; C:GO:0012505; F:GO:0017137; F:GO:0052689	P:activation of GTPase activity; F:GTPase activator activity; C:Golgi apparatus; C:extracellular region; P:intracellular protein transport; P:positive regulation of transcription from RNA polymerase II promoter; C:intracellular; C:cytoplasmic vesicle membrane; P:regulation of vesicle fusion; F:protein binding; C:cytoplasm; C:membrane; C:cytosol; C:cytoplasmic vesicle; C:endomembrane system; F:Rab…
AgB01_g393_t01	Small G signaling modulator 1	84	20	2.88291e-50	76.45	7	P:GO:0031338; P:GO:0090630; F:GO:0005096; C:GO:0012505; P:GO:0006886; F:GO:0017137; C:GO:0005622	P:regulation of vesicle fusion; P:activation of GTPase activity; F:GTPase activator activity; C:endomembrane system; P:intracellular protein transport; F:Rab GTPase binding; C:intracellular
AgB01_g394_t01	RUN and TBC1 domain containing 2	271	20	2.27644e-64	53.7	12	P:GO:0031338; P:GO:0090630; C:GO:0005737; F:GO:0005096; C:GO:0012505; P:GO:0034499; C:GO:0005576; P:GO:0006886; F:GO:0017137; F:GO:0052689; C:GO:0005622; P:GO:0043547	P:regulation of vesicle fusion; P:activation of GTPase activity; C:cytoplasm; F:GTPase activator activity; C:endomembrane system; P:late endosome to Golgi transport; C:extracellular region; P:intracellular protein transport; F:Rab GTPase binding; F:carboxylic ester hydrolase activity; C:intracellular; P:positive regulation of GTPase activity
AgB01_g395_t05	ankyrin repeat	856	20	0	47.85
AgB01_g396_t01	---NA---	118
AgB01_g397_t02	hypothetical protein LOAG_02024	226	1	7.12685e-08	68
AgB01_g398_t04	Sodium:Neurotransmitter symporter Family family member (snf-12)	398	5	5.1419e-25	59.8	14	P:GO:0055085; F:GO:0015293; F:GO:0008134; P:GO:0006810; F:GO:0005215; P:GO:0006836; C:GO:0030139; C:GO:0005887; F:GO:0005328; C:GO:0045177; C:GO:0016020; C:GO:0016021; P:GO:0002804; P:GO:0033554	P:transmembrane transport; F:symporter activity; F:transcription factor binding; P:transport; F:transporter activity; P:neurotransmitter transport; C:endocytic vesicle; C:integral component of plasma membrane; F:neurotransmitter:sodium symporter activity; C:apical part of cell; C:membrane; C:integral component of membrane; P:positive regulation of antifungal peptide production; P:cellular respons…
AgB01_g399_t02	norepinephrine norepinephrine transporter	199	20	7.29072e-15	62.5	25	P:GO:0019915; F:GO:0015293; F:GO:0005332; C:GO:0043005; F:GO:0005215; P:GO:0006836; C:GO:0005887; C:GO:0098793; F:GO:0005328; C:GO:0045177; P:GO:0033554; P:GO:0098779; C:GO:0030424; P:GO:0055085; F:GO:0015222; P:GO:0007268; F:GO:0008134; P:GO:0006810; C:GO:0005886; P:GO:0051610; C:GO:0030139; C:GO:0016020; C:GO:0016021; P:GO:0002804; P:GO:0015812	P:lipid storage; F:symporter activity; F:gamma-aminobutyric acid:sodium symporter activity; C:neuron projection; F:transporter activity; P:neurotransmitter transport; C:integral component of plasma membrane; C:presynapse; F:neurotransmitter:sodium symporter activity; C:apical part of cell; P:cellular response to stress; P:positive regulation of macromitophagy in response to mitochondrial depolari…
AgB01_g400_t02	tRNA (guanine-N(7)-)-methyltransferase subunit WDR4	434	20	0	50.8	20	C:GO:0043527; P:GO:0036265; P:GO:0007275; P:GO:0008033; F:GO:0008176; P:GO:0007283; F:GO:0008168; P:GO:0006400; C:GO:0005654; C:GO:0001673; C:GO:0001674; C:GO:0005634; F:GO:0005515; C:GO:0005737; P:GO:0048477; P:GO:0030154; C:GO:0005829; F:GO:0016740; P:GO:0030488; P:GO:0032259	C:tRNA methyltransferase complex; P:RNA (guanine-N7)-methylation; P:multicellular organism development; P:tRNA processing; F:tRNA (guanine-N7-)-methyltransferase activity; P:spermatogenesis; F:methyltransferase activity; P:tRNA modification; C:nucleoplasm; C:male germ cell nucleus; C:female germ cell nucleus; C:nucleus; F:protein binding; C:cytoplasm; P:oogenesis; P:cell differentiation; C:cytoso…
AgB01_g401_t05	n-alpha-acetyltransferase auxiliary subunit-like	863	20	0	64.85	23	F:GO:0016407; P:GO:0007275; P:GO:0006351; P:GO:0009792; P:GO:0006355; P:GO:0006474; F:GO:0004596; P:GO:0000003; F:GO:0003723; C:GO:0005667; C:GO:0005634; C:GO:0031415; F:GO:0005515; C:GO:0005737; P:GO:0001525; P:GO:0045893; P:GO:0017196; F:GO:0043022; P:GO:0043066; C:GO:0016020; P:GO:0030154; F:GO:0016740; P:GO:0050821	F:acetyltransferase activity; P:multicellular organism development; P:transcription, DNA-templated; P:embryo development ending in birth or egg hatching; P:regulation of transcription, DNA-templated; P:N-terminal protein amino acid acetylation; F:peptide alpha-N-acetyltransferase activity; P:reproduction; F:RNA binding; C:transcription factor complex; C:nucleus; C:NatA complex; F:protein binding;…
AgB01_g402_t01	ES2	519	20	0	57.55	15	P:GO:0007165; P:GO:0007264; P:GO:0006351; P:GO:0009792; P:GO:0006355; P:GO:0007126; F:GO:0003674; C:GO:0005622; F:GO:0005525; F:GO:0000166; F:GO:0003677; C:GO:0005634; F:GO:0003700; P:GO:0045132; C:GO:0016020	P:signal transduction; P:small GTPase mediated signal transduction; P:transcription, DNA-templated; P:embryo development ending in birth or egg hatching; P:regulation of transcription, DNA-templated; P:meiotic nuclear division; F:molecular_function; C:intracellular; F:GTP binding; F:nucleotide binding; F:DNA binding; C:nucleus; F:transcription factor activity, sequence-specific DNA binding; P:mei…
AgB01_g403_t04	kinase domain containing	894	20	0	75.55	48	P:GO:0043405; P:GO:0008380; C:GO:0016607; P:GO:0030097; P:GO:0090277; F:GO:0044212; P:GO:0046579; P:GO:0046777; P:GO:0022008; C:GO:0005794; C:GO:0008024; C:GO:0005694; P:GO:0045944; C:GO:0005730; P:GO:0006468; P:GO:0040018; C:GO:0005654; P:GO:0006368; P:GO:0051301; F:GO:0000166; F:GO:0005524; C:GO:0005700; C:GO:0005703; P:GO:0000380; P:GO:2000737; P:GO:0051726; P:GO:0016310; P:GO:0070816; F:GO:00…	P:regulation of MAP kinase activity; P:RNA splicing; C:nuclear speck; P:hemopoiesis; P:positive regulation of peptide hormone secretion; F:transcription regulatory region DNA binding; P:positive regulation of Ras protein signal transduction; P:protein autophosphorylation; P:neurogenesis; C:Golgi apparatus; C:cyclin/CDK positive transcription elongation factor complex; C:chromosome; P:positive reg…
AgB01_g404_t01	hypothetical protein LOAG_04968	194	2	7.13732e-06	68
AgB01_g405_t02	Hypothetical UPF0041 in chromosome	135	20	2.6601e-98	79.6	9	F:GO:0003676; C:GO:0031305; P:GO:1901475; C:GO:0005739; C:GO:0016020; C:GO:0016021; P:GO:0006850; F:GO:0050833; C:GO:0005743	F:nucleic acid binding; C:integral component of mitochondrial inner membrane; P:pyruvate transmembrane transport; C:mitochondrion; C:membrane; C:integral component of membrane; P:mitochondrial pyruvate transport; F:pyruvate transmembrane transporter activity; C:mitochondrial inner membrane
AgB01_g406_t03	CORonin family member (cor-1)	603	20	0	75.6	7	F:GO:0051015; F:GO:0003779; C:GO:0016020; C:GO:0016021; C:GO:0015629; P:GO:0030036; P:GO:0007126	F:actin filament binding; F:actin binding; C:membrane; C:integral component of membrane; C:actin cytoskeleton; P:actin cytoskeleton organization; P:meiotic nuclear division
AgB01_g407_t04	H ACA ribonucleo complex subunit 4	450	20	0	84.65	40	P:GO:0008283; P:GO:1904874; P:GO:0031120; P:GO:1904851; P:GO:0009451; C:GO:0015030; P:GO:0042254; P:GO:0006364; C:GO:0005730; C:GO:0005697; P:GO:0000454; C:GO:0005732; C:GO:0005654; F:GO:0003720; P:GO:0001522; P:GO:0033979; P:GO:0031118; F:GO:0003723; C:GO:0030529; P:GO:0002119; C:GO:0072588; F:GO:0016853; C:GO:0090661; P:GO:0007004; P:GO:0006396; F:GO:0009982; P:GO:1990481; P:GO:0000003; F:GO:00…	P:cell proliferation; P:positive regulation of telomerase RNA localization to Cajal body; P:snRNA pseudouridine synthesis; P:positive regulation of establishment of protein localization to telomere; P:RNA modification; C:Cajal body; P:ribosome biogenesis; P:rRNA processing; C:nucleolus; C:telomerase holoenzyme complex; P:snoRNA guided rRNA pseudouridine synthesis; C:small nucleolar ribonucleoprot…
AgB01_g408_t01	---NA---	139
AgB01_g409_t01	GTP-binding nuclear Ran	216	20	2.13138e-150	88.25	82	P:GO:0032092; P:GO:0007052; P:GO:0009792; P:GO:0015031; C:GO:0000777; C:GO:0000776; P:GO:0035281; C:GO:0000775; P:GO:0006886; C:GO:0001673; P:GO:0006913; P:GO:0034629; P:GO:0075733; P:GO:0002119; P:GO:0043393; P:GO:0045893; F:GO:0003924; P:GO:0006915; P:GO:0000060; F:GO:0019003; C:GO:0005829; F:GO:0070883; F:GO:0032403; C:GO:0036126; F:GO:0019904; C:GO:0090543; P:GO:0007264; P:GO:0046785; P:GO:00…	P:positive regulation of protein binding; P:mitotic spindle organization; P:embryo development ending in birth or egg hatching; P:protein transport; C:condensed chromosome kinetochore; C:kinetochore; P:pre-miRNA export from nucleus; C:chromosome, centromeric region; P:intracellular protein transport; C:male germ cell nucleus; P:nucleocytoplasmic transport; P:cellular protein complex localization;…
AgB01_g410_t04	molecular chaperone	575	20	1.86617e-135	60.4	25	P:GO:0006260; P:GO:0009792; F:GO:0043169; P:GO:0009553; P:GO:0009558; F:GO:0005524; P:GO:0009408; F:GO:0003824; F:GO:0031072; P:GO:0010198; F:GO:0008270; P:GO:0010197; P:GO:0051085; F:GO:0051082; P:GO:0042981; F:GO:0004553; P:GO:0006457; P:GO:0007005; P:GO:0000740; P:GO:0005975; F:GO:0046872; C:GO:0005737; C:GO:0016020; C:GO:0005739; C:GO:0016021	P:DNA replication; P:embryo development ending in birth or egg hatching; F:cation binding; P:embryo sac development; P:embryo sac cellularization; F:ATP binding; P:response to heat; F:catalytic activity; F:heat shock protein binding; P:synergid death; F:zinc ion binding; P:polar nucleus fusion; P:chaperone mediated protein folding requiring cofactor; F:unfolded protein binding; P:regulation of ap…
AgB01_g411_t02	lethal (2) tumorous imaginal discs	183	20	4.19994e-126	67.7	19	F:GO:0031072; F:GO:0008270; P:GO:0007275; P:GO:0006260; P:GO:0009792; F:GO:0043169; F:GO:0051082; C:GO:0005741; F:GO:0004553; P:GO:0006457; F:GO:0005524; P:GO:0005975; P:GO:0009408; C:GO:0005737; F:GO:0046872; F:GO:0003824; C:GO:0005739; C:GO:0016020; C:GO:0016021	F:heat shock protein binding; F:zinc ion binding; P:multicellular organism development; P:DNA replication; P:embryo development ending in birth or egg hatching; F:cation binding; F:unfolded protein binding; C:mitochondrial outer membrane; F:hydrolase activity, hydrolyzing O-glycosyl compounds; P:protein folding; F:ATP binding; P:carbohydrate metabolic process; P:response to heat; C:cytoplasm; F:m…
AgB01_g412_t04	F-box domain containing	360	5	2.14874e-96	53.8
AgB01_g413_t02	elegans confirmed by transcript evidence	109	20	1.60257e-34	68.2
AgB01_g414_t01	developmentally regulated GTP binding 1	366	20	0	88.35	15	F:GO:0042802; P:GO:0040035; P:GO:0007275; P:GO:0006351; P:GO:0009792; F:GO:0008134; P:GO:0000003; P:GO:0040007; F:GO:0005525; C:GO:0005844; F:GO:0000166; F:GO:0005515; C:GO:0005737; P:GO:0002119; C:GO:0016020	F:identical protein binding; P:hermaphrodite genitalia development; P:multicellular organism development; P:transcription, DNA-templated; P:embryo development ending in birth or egg hatching; F:transcription factor binding; P:reproduction; P:growth; F:GTP binding; C:polysome; F:nucleotide binding; F:protein binding; C:cytoplasm; P:nematode larval development; C:membrane
AgB01_g415_t03	PX domain-containing kinase	358	20	0	54.05	20	P:GO:0032780; F:GO:0008022; F:GO:0035091; F:GO:0004672; C:GO:0043234; P:GO:0006468; C:GO:0005886; F:GO:0000166; C:GO:0005634; F:GO:0005524; P:GO:0043271; P:GO:0006954; P:GO:0042391; F:GO:0003779; C:GO:0005815; C:GO:0005737; C:GO:0016020; P:GO:0050804; P:GO:0016310; F:GO:0016301	P:negative regulation of ATPase activity; F:protein C-terminus binding; F:phosphatidylinositol binding; F:protein kinase activity; C:protein complex; P:protein phosphorylation; C:plasma membrane; F:nucleotide binding; C:nucleus; F:ATP binding; P:negative regulation of ion transport; P:inflammatory response; P:regulation of membrane potential; F:actin binding; C:microtubule organizing center; C:cy…
AgB01_g416_t01	basic leucine zipper nuclear factor 1	314	20	0	56.65	20	P:GO:0008283; P:GO:0007030; P:GO:0015031; P:GO:0043001; C:GO:0005794; C:GO:0000139; C:GO:0005796; P:GO:0006810; C:GO:0005622; C:GO:0005654; P:GO:0006357; F:GO:0003677; C:GO:0005634; F:GO:0003700; F:GO:0005515; P:GO:0016192; F:GO:0031625; C:GO:0005737; P:GO:0001558; F:GO:0019899	P:cell proliferation; P:Golgi organization; P:protein transport; P:Golgi to plasma membrane protein transport; C:Golgi apparatus; C:Golgi membrane; C:Golgi lumen; P:transport; C:intracellular; C:nucleoplasm; P:regulation of transcription from RNA polymerase II promoter; F:DNA binding; C:nucleus; F:transcription factor activity, sequence-specific DNA binding; F:protein binding; P:vesicle-mediated …
AgB01_g417_t01	hypothetical protein LOAG_03255	614	2	5.72253e-29	56
AgB01_g418_t03	disulfide isomerase	504	20	0	60.9	25	P:GO:1902175; F:GO:0015035; P:GO:0040011; P:GO:0009792; P:GO:0080058; C:GO:0005788; C:GO:0005623; P:GO:0030968; P:GO:0002119; F:GO:0016853; P:GO:0010171; C:GO:0005783; P:GO:0045454; P:GO:0006457; P:GO:0043412; F:GO:0003810; F:GO:0003756; C:GO:0016020; C:GO:0016021; P:GO:0019511; P:GO:0055114; C:GO:0016222; F:GO:0031545; P:GO:0018401; P:GO:0034976	P:regulation of oxidative stress-induced intrinsic apoptotic signaling pathway; F:protein disulfide oxidoreductase activity; P:locomotion; P:embryo development ending in birth or egg hatching; P:protein deglutathionylation; C:endoplasmic reticulum lumen; C:cell; P:endoplasmic reticulum unfolded protein response; P:nematode larval development; F:isomerase activity; P:body morphogenesis; C:endoplas…
AgB01_g419_t02	Kelch 18	588	20	0	72.35	6	F:GO:0004842; P:GO:0009792; C:GO:0031463; P:GO:0042787; P:GO:0000003; P:GO:0016567	F:ubiquitin-protein transferase activity; P:embryo development ending in birth or egg hatching; C:Cul3-RING ubiquitin ligase complex; P:protein ubiquitination involved in ubiquitin-dependent protein catabolic process; P:reproduction; P:protein ubiquitination
AgB01_g420_t01	---NA---	114
AgB01_g421_t03	hypothetical protein LOAG_05660	365	6	8.72437e-146	54.33
AgB01_g422_t02	ribosomal S12	140	20	2.62401e-96	84.9	17	C:GO:0022627; P:GO:0006364; C:GO:0022625; C:GO:0005840; P:GO:0006413; C:GO:0005622; F:GO:0003723; C:GO:0005654; P:GO:0006412; P:GO:0019083; P:GO:0006614; F:GO:0003735; C:GO:0030529; P:GO:0000184; C:GO:0005737; C:GO:0016020; C:GO:0005829	C:cytosolic small ribosomal subunit; P:rRNA processing; C:cytosolic large ribosomal subunit; C:ribosome; P:translational initiation; C:intracellular; F:RNA binding; C:nucleoplasm; P:translation; P:viral transcription; P:SRP-dependent cotranslational protein targeting to membrane; F:structural constituent of ribosome; C:intracellular ribonucleoprotein complex; P:nuclear-transcribed mRNA catabolic …
AgB01_g423_t05	solute carrier family member B3	361	20	0	68.25	15	P:GO:0055085; C:GO:0030173; P:GO:0046963; F:GO:0046964; C:GO:0000139; C:GO:0005794; P:GO:0002230; P:GO:0098792; P:GO:0006810; P:GO:1902559; C:GO:0005739; C:GO:0016020; C:GO:0016021; C:GO:0030176; P:GO:0098779	P:transmembrane transport; C:integral component of Golgi membrane; P:3'-phosphoadenosine 5'-phosphosulfate transport; F:3'-phosphoadenosine 5'-phosphosulfate transmembrane transporter activity; C:Golgi membrane; C:Golgi apparatus; P:positive regulation of defense response to virus by host; P:xenophagy; P:transport; P:3'-phospho-5'-adenylyl sulfate transmembrane transport; C:mitochondrion; C:membr…
AgB01_g424_t01	Down syndrome critical region gene 1-like 2	208	20	8.2303e-140	65.35	18	F:GO:0008597; P:GO:0009653; C:GO:0005622; F:GO:0000166; F:GO:0004865; P:GO:0034608; C:GO:0005634; P:GO:0034606; F:GO:0005515; F:GO:0003723; C:GO:0005737; P:GO:0050790; F:GO:0031013; P:GO:0040040; P:GO:0070884; P:GO:0019722; P:GO:0032515; F:GO:0030346	F:calcium-dependent protein serine/threonine phosphatase regulator activity; P:anatomical structure morphogenesis; C:intracellular; F:nucleotide binding; F:protein serine/threonine phosphatase inhibitor activity; P:vulval location; C:nucleus; P:response to hermaphrodite contact; F:protein binding; F:RNA binding; C:cytoplasm; P:regulation of catalytic activity; F:troponin I binding; P:thermosensor…
AgB01_g425_t01	Down syndrome critical region gene 1-like 2	109	20	4.17959e-63	65.65	18	P:GO:0009653; F:GO:0008597; C:GO:0005622; F:GO:0000166; F:GO:0004865; P:GO:0034608; C:GO:0005634; P:GO:0034606; F:GO:0005515; F:GO:0003723; C:GO:0005737; P:GO:0050790; F:GO:0031013; P:GO:0040040; P:GO:0070884; P:GO:0019722; P:GO:0032515; F:GO:0030346	P:anatomical structure morphogenesis; F:calcium-dependent protein serine/threonine phosphatase regulator activity; C:intracellular; F:nucleotide binding; F:protein serine/threonine phosphatase inhibitor activity; P:vulval location; C:nucleus; P:response to hermaphrodite contact; F:protein binding; F:RNA binding; C:cytoplasm; P:regulation of catalytic activity; F:troponin I binding; P:thermosensor…
AgB01_g426_t01	mitogen-activated kinase 15	488	20	0	81.65	17	P:GO:0009792; P:GO:1904355; P:GO:0046777; F:GO:0004672; F:GO:0004674; P:GO:0006468; C:GO:0005622; F:GO:0000166; P:GO:0051973; P:GO:0000165; F:GO:0005524; P:GO:0002119; P:GO:0032212; F:GO:0004707; P:GO:0016310; F:GO:0016740; F:GO:0016301	P:embryo development ending in birth or egg hatching; P:positive regulation of telomere capping; P:protein autophosphorylation; F:protein kinase activity; F:protein serine/threonine kinase activity; P:protein phosphorylation; C:intracellular; F:nucleotide binding; P:positive regulation of telomerase activity; P:MAPK cascade; F:ATP binding; P:nematode larval development; P:positive regulation of t…
AgB01_g427_t04	ribosomal S27a	162	20	1.05979e-79	68.4	23	P:GO:0006281; C:GO:0043209; C:GO:0022627; P:GO:0002181; C:GO:0005840; C:GO:0005730; C:GO:0005875; C:GO:0005654; F:GO:0003723; P:GO:0006412; C:GO:0005634; C:GO:0005615; C:GO:0070062; F:GO:0003735; C:GO:0030529; C:GO:0005737; F:GO:0046872; C:GO:0016020; C:GO:0016021; C:GO:0015935; F:GO:0031386; P:GO:0019985; P:GO:0016567	P:DNA repair; C:myelin sheath; C:cytosolic small ribosomal subunit; P:cytoplasmic translation; C:ribosome; C:nucleolus; C:microtubule associated complex; C:nucleoplasm; F:RNA binding; P:translation; C:nucleus; C:extracellular space; C:extracellular exosome; F:structural constituent of ribosome; C:intracellular ribonucleoprotein complex; C:cytoplasm; F:metal ion binding; C:membrane; C:integral com…
AgB01_g428_t01	---NA---	109
AgB01_g429_t02	Tyrosine- kinase kin-31	446	20	0	66.3	17	P:GO:0018108; P:GO:0007169; P:GO:0038083; F:GO:0004672; P:GO:0006468; F:GO:0005102; P:GO:0042127; F:GO:0000166; F:GO:0005524; F:GO:0004713; F:GO:0004715; P:GO:0045087; P:GO:0030154; C:GO:0031234; P:GO:0016310; F:GO:0016740; F:GO:0016301	P:peptidyl-tyrosine phosphorylation; P:transmembrane receptor protein tyrosine kinase signaling pathway; P:peptidyl-tyrosine autophosphorylation; F:protein kinase activity; P:protein phosphorylation; F:receptor binding; P:regulation of cell proliferation; F:nucleotide binding; F:ATP binding; F:protein tyrosine kinase activity; F:non-membrane spanning protein tyrosine kinase activity; P:innate imm…
AgB01_g430_t02	---NA---	181
AgB01_g431_t01	---NA---	95
AgB01_g432_t01	---NA---	195
AgB01_g433_t01	---NA---	106
AgB01_g434_t01	---NA---	193
AgB01_g435_t01	---NA---	82
AgB01_g436_t01	Iron-sulfur cluster assembly accessory	269	20	1.10822e-174	86.85	17	P:GO:0006790; F:GO:0008198; P:GO:0009792; F:GO:0005198; P:GO:0006397; P:GO:0006898; C:GO:0005634; F:GO:0003723; C:GO:0005759; C:GO:0005737; P:GO:0002119; P:GO:0071000; P:GO:0097428; F:GO:0051539; F:GO:0051536; F:GO:0051537; P:GO:0016226	P:sulfur compound metabolic process; F:ferrous iron binding; P:embryo development ending in birth or egg hatching; F:structural molecule activity; P:mRNA processing; P:receptor-mediated endocytosis; C:nucleus; F:RNA binding; C:mitochondrial matrix; C:cytoplasm; P:nematode larval development; P:response to magnetism; P:protein maturation by iron-sulfur cluster transfer; F:4 iron, 4 sulfur cluster …
AgB01_g437_t01	tudor domain-containing 3-like	158	20	4.92926e-99	59.95	14	P:GO:0016569; C:GO:0035145; F:GO:0035064; F:GO:0005198; P:GO:0006397; F:GO:0003682; P:GO:1903506; F:GO:0003723; C:GO:0005634; F:GO:0003723; F:GO:0003713; C:GO:0005737; F:GO:0051536; P:GO:0016226	P:covalent chromatin modification; C:exon-exon junction complex; F:methylated histone binding; F:structural molecule activity; P:mRNA processing; F:chromatin binding; P:regulation of nucleic acid-templated transcription; F:RNA binding; C:nucleus; F:RNA binding; F:transcription coactivator activity; C:cytoplasm; F:iron-sulfur cluster binding; P:iron-sulfur cluster assembly
AgB01_g438_t01	---NA---	109
AgB01_g439_t01	---NA---	102
AgB01_g440_t01	---NA---	100
AgB01_g441_t01	---NA---	434
AgB01_g442_t01	Zona pellucida-like domain containing	293	20	3.72121e-123	57.2	16	F:GO:0003690; P:GO:0006355; F:GO:0008026; F:GO:0004386; F:GO:0000166; F:GO:0001046; F:GO:0003676; C:GO:0005634; F:GO:0005524; F:GO:0003678; F:GO:0043141; P:GO:0032508; C:GO:0005739; C:GO:0016020; C:GO:0016021; F:GO:0016787	F:double-stranded DNA binding; P:regulation of transcription, DNA-templated; F:ATP-dependent helicase activity; F:helicase activity; F:nucleotide binding; F:core promoter sequence-specific DNA binding; F:nucleic acid binding; C:nucleus; F:ATP binding; F:DNA helicase activity; F:ATP-dependent 5'-3' DNA helicase activity; P:DNA duplex unwinding; C:mitochondrion; C:membrane; C:integral component of …
AgB01_g443_t02	Zona pellucida-like domain containing	406	20	0	62.1	16	F:GO:0003690; P:GO:0006355; F:GO:0008026; F:GO:0004386; F:GO:0000166; F:GO:0001046; F:GO:0003676; C:GO:0005634; F:GO:0005524; F:GO:0003678; F:GO:0043141; P:GO:0032508; C:GO:0005739; C:GO:0016020; C:GO:0016021; F:GO:0016787	F:double-stranded DNA binding; P:regulation of transcription, DNA-templated; F:ATP-dependent helicase activity; F:helicase activity; F:nucleotide binding; F:core promoter sequence-specific DNA binding; F:nucleic acid binding; C:nucleus; F:ATP binding; F:DNA helicase activity; F:ATP-dependent 5'-3' DNA helicase activity; P:DNA duplex unwinding; C:mitochondrion; C:membrane; C:integral component of …
AgB01_g444_t01	hypothetical protein Bm1_32225	228	3	1.47954e-67	76.33
AgB01_g445_t01	---NA---	85
AgB01_g446_t05	hypothetical protein Bm1_25365	367	1	3.34409e-05	41
AgB01_g447_t01	---NA---	93
AgB01_g448_t01	---NA---	112
AgB01_g449_t05	kinase ADK1	643	20	0	65.4	44	P:GO:0008360; F:GO:0015631; P:GO:0007030; P:GO:0046777; C:GO:0005794; P:GO:0042752; P:GO:0043622; P:GO:0006468; P:GO:0061512; F:GO:0000166; P:GO:0051225; F:GO:0005524; P:GO:0032922; C:GO:0009506; P:GO:0016055; P:GO:0016310; C:GO:0055028; P:GO:0071539; P:GO:0034067; P:GO:2000052; P:GO:0007020; P:GO:0090263; F:GO:0004672; F:GO:0004674; P:GO:0006897; C:GO:0005886; P:GO:0051510; C:GO:0005634; C:GO:00…	P:regulation of cell shape; F:tubulin binding; P:Golgi organization; P:protein autophosphorylation; C:Golgi apparatus; P:regulation of circadian rhythm; P:cortical microtubule organization; P:protein phosphorylation; P:protein localization to cilium; F:nucleotide binding; P:spindle assembly; F:ATP binding; P:circadian regulation of gene expression; C:plasmodesma; P:Wnt signaling pathway; P:phosph…
AgB01_g450_t04	photosystem I assembly	220	20	3.59285e-142	64.95	4	F:GO:0003824; P:GO:0008152; C:GO:0005575; F:GO:0016765	F:catalytic activity; P:metabolic process; C:cellular_component; F:transferase activity, transferring alkyl or aryl (other than methyl) groups
AgB01_g451_t01	---NA---	137
AgB01_g452_t05	elegans ly confirmed by transcript evidence	230	20	1.47901e-153	63	4	C:GO:0005856; P:GO:0040011; C:GO:0016020; C:GO:0016021	C:cytoskeleton; P:locomotion; C:membrane; C:integral component of membrane
AgB01_g453_t05	serine threonine kinase	571	20	0	61.65	18	P:GO:0043405; P:GO:0045599; F:GO:0004672; F:GO:0008134; F:GO:0004674; P:GO:0006468; P:GO:1903507; C:GO:0005634; F:GO:0005524; F:GO:0031625; F:GO:0003714; P:GO:0001889; P:GO:0016310; P:GO:0032436; P:GO:0045081; F:GO:0016301; F:GO:0055106; F:GO:0031434	P:regulation of MAP kinase activity; P:negative regulation of fat cell differentiation; F:protein kinase activity; F:transcription factor binding; F:protein serine/threonine kinase activity; P:protein phosphorylation; P:negative regulation of nucleic acid-templated transcription; C:nucleus; F:ATP binding; F:ubiquitin protein ligase binding; F:transcription corepressor activity; P:liver developmen…
AgB01_g454_t01	---NA---	106
AgB01_g455_t06	Endoplasmic reticulum-Golgi intermediate compartment 3	338	20	0	65.8	8	C:GO:0005789; P:GO:0016192; C:GO:0016020; C:GO:0016021; C:GO:0005794; C:GO:0005783; P:GO:0006810; C:GO:0033116	C:endoplasmic reticulum membrane; P:vesicle-mediated transport; C:membrane; C:integral component of membrane; C:Golgi apparatus; C:endoplasmic reticulum; P:transport; C:endoplasmic reticulum-Golgi intermediate compartment membrane
AgB01_g456_t01	---NA---	97
AgB01_g457_t01	---NA---	95
AgB01_g458_t01	mitochondrial carrier homolog 2	209	20	2.83581e-120	55.05	26	P:GO:0019915; P:GO:1902231; P:GO:0008340; P:GO:0009792; P:GO:0045820; P:GO:0090152; P:GO:0006089; P:GO:0042775; P:GO:0010917; C:GO:0070062; P:GO:0002119; P:GO:0070585; P:GO:0071478; P:GO:0061484; C:GO:0005741; P:GO:0006810; C:GO:0005743; P:GO:0097284; P:GO:1902108; P:GO:0043280; C:GO:0005634; P:GO:0043065; C:GO:0016020; C:GO:0005739; C:GO:0016021; P:GO:0035701	P:lipid storage; P:positive regulation of intrinsic apoptotic signaling pathway in response to DNA damage; P:determination of adult lifespan; P:embryo development ending in birth or egg hatching; P:negative regulation of glycolytic process; P:establishment of protein localization to mitochondrial membrane involved in mitochondrial fission; P:lactate metabolic process; P:mitochondrial ATP synthesi…
AgB01_g459_t02	briggsae CBR-TAG-343	1127	20	1.87536e-46	52.1	7	F:GO:0005525; P:GO:0040011; C:GO:0016020; P:GO:0016570; C:GO:0016593; C:GO:0016021; P:GO:0006368	F:GTP binding; P:locomotion; C:membrane; P:histone modification; C:Cdc73/Paf1 complex; C:integral component of membrane; P:transcription elongation from RNA polymerase II promoter
AgB01_g460_t02	---NA---	123
AgB01_g461_t01	Heterogeneous nuclear ribonucleo Q	261	20	3.83043e-171	78.15	10	F:GO:0000166; F:GO:0003676; C:GO:0005634; P:GO:0040035; C:GO:0030529; P:GO:0048477; P:GO:0009792; P:GO:0006915; C:GO:0019013; P:GO:0000003	F:nucleotide binding; F:nucleic acid binding; C:nucleus; P:hermaphrodite genitalia development; C:intracellular ribonucleoprotein complex; P:oogenesis; P:embryo development ending in birth or egg hatching; P:apoptotic process; C:viral nucleocapsid; P:reproduction
AgB01_g462_t02	elegans ly confirmed by transcript evidence	303	13	8.62126e-46	51.54
AgB01_g463_t04	Tau-tubulin kinase 2	508	20	0	58.7	12	F:GO:0000166; P:GO:0008360; F:GO:0005524; C:GO:0005634; P:GO:0019915; C:GO:0005737; F:GO:0004672; P:GO:0016310; P:GO:0018105; F:GO:0004674; P:GO:0006468; F:GO:0016301	F:nucleotide binding; P:regulation of cell shape; F:ATP binding; C:nucleus; P:lipid storage; C:cytoplasm; F:protein kinase activity; P:phosphorylation; P:peptidyl-serine phosphorylation; F:protein serine/threonine kinase activity; P:protein phosphorylation; F:kinase activity
AgB01_g464_t01	CRAL TRIO domain containing	250	20	1.31651e-161	62.35	4	C:GO:0005737; P:GO:0002119; C:GO:0016021; P:GO:0006810	C:cytoplasm; P:nematode larval development; C:integral component of membrane; P:transport
AgB01_g465_t01	ADP-ribosylation Crystallin J1	342	20	1.2752e-15	41.25	7	P:GO:0008152; P:GO:0046854; P:GO:0051725; P:GO:0009399; F:GO:0047407; F:GO:0016787; F:GO:0016798	P:metabolic process; P:phosphatidylinositol phosphorylation; P:protein de-ADP-ribosylation; P:nitrogen fixation; F:ADP-ribosyl-[dinitrogen reductase] hydrolase activity; F:hydrolase activity; F:hydrolase activity, acting on glycosyl bonds
AgB01_g466_t01	---NA---	160
AgB01_g467_t05	Esterase	329	20	0	53.05	8	C:GO:0005615; P:GO:0019915; P:GO:0002119; P:GO:0009792; P:GO:0008152; F:GO:0004104; P:GO:0000003; F:GO:0016787	C:extracellular space; P:lipid storage; P:nematode larval development; P:embryo development ending in birth or egg hatching; P:metabolic process; F:cholinesterase activity; P:reproduction; F:hydrolase activity
AgB01_g468_t01	tripartite motif-containing 59-like	626	20	8.03375e-12	46.6	18	F:GO:0061630; F:GO:0008270; C:GO:0005783; P:GO:0043124; C:GO:0005622; C:GO:0005789; F:GO:0000166; F:GO:0003676; C:GO:0005813; F:GO:0005515; F:GO:0046872; P:GO:0046597; P:GO:0045087; C:GO:0016020; C:GO:0016021; C:GO:0005929; C:GO:0030992; P:GO:0016567	F:ubiquitin protein ligase activity; F:zinc ion binding; C:endoplasmic reticulum; P:negative regulation of I-kappaB kinase/NF-kappaB signaling; C:intracellular; C:endoplasmic reticulum membrane; F:nucleotide binding; F:nucleic acid binding; C:centrosome; F:protein binding; F:metal ion binding; P:negative regulation of viral entry into host cell; P:innate immune response; C:membrane; C:integral co…
AgB01_g469_t01	Homeobox ceh-30	134	3	2.45881e-72	61.67	4	F:GO:0003677; C:GO:0005634; P:GO:0006355; F:GO:0043565	F:DNA binding; C:nucleus; P:regulation of transcription, DNA-templated; F:sequence-specific DNA binding
AgB01_g470_t01	Homeobox ceh-30	303	20	1.2331e-179	76.75	36	P:GO:0008283; P:GO:0007275; F:GO:0000977; P:GO:0007399; P:GO:0006366; F:GO:0043565; F:GO:0001228; P:GO:0048513; F:GO:0004000; P:GO:0045944; P:GO:0040018; F:GO:0003674; F:GO:0004930; P:GO:0007548; P:GO:0018298; P:GO:0050896; P:GO:0040027; P:GO:0040025; P:GO:0007186; P:GO:0006351; P:GO:0007165; F:GO:0009881; P:GO:0006355; P:GO:0007601; F:GO:0004871; P:GO:0007602; P:GO:0009888; P:GO:0000003; P:GO:00…	P:cell proliferation; P:multicellular organism development; F:RNA polymerase II regulatory region sequence-specific DNA binding; P:nervous system development; P:transcription from RNA polymerase II promoter; F:sequence-specific DNA binding; F:transcriptional activator activity, RNA polymerase II transcription regulatory region sequence-specific binding; P:animal organ development; F:adenosine dea…
AgB01_g471_t02	---NA---	89
AgB01_g472_t05	thrombospondin type 1 domain-containing	974	20	9.82222e-119	51.3	1	P:GO:0042981	P:regulation of apoptotic process
AgB01_g473_t01	---NA---	178
AgB01_g474_t02	-like homeobox 1	175	20	2.66431e-26	81.75	28	F:GO:0000977; P:GO:0006366; F:GO:0043565; F:GO:0001228; F:GO:0004000; P:GO:0045944; P:GO:0043524; P:GO:0007605; F:GO:0004930; P:GO:0001764; P:GO:0030901; F:GO:0001077; P:GO:0018298; P:GO:0050896; P:GO:0007186; P:GO:0007165; P:GO:0006351; F:GO:0009881; P:GO:0006355; P:GO:0007601; F:GO:0004871; P:GO:0007602; P:GO:0006357; F:GO:0003677; C:GO:0005634; C:GO:0016020; C:GO:0016021; F:GO:0016787	F:RNA polymerase II regulatory region sequence-specific DNA binding; P:transcription from RNA polymerase II promoter; F:sequence-specific DNA binding; F:transcriptional activator activity, RNA polymerase II transcription regulatory region sequence-specific binding; F:adenosine deaminase activity; P:positive regulation of transcription from RNA polymerase II promoter; P:negative regulation of neur…
AgB01_g475_t01	3-hydroxyacyl- NAD-binding	131	20	6.60837e-77	58.55	14	C:GO:0016507; P:GO:0008152; F:GO:0008691; F:GO:0016829; F:GO:0004300; P:GO:0006631; P:GO:0006635; F:GO:0016491; F:GO:0003824; F:GO:0003857; C:GO:0005739; P:GO:0006629; P:GO:0055114; F:GO:0070403	C:mitochondrial fatty acid beta-oxidation multienzyme complex; P:metabolic process; F:3-hydroxybutyryl-CoA dehydrogenase activity; F:lyase activity; F:enoyl-CoA hydratase activity; P:fatty acid metabolic process; P:fatty acid beta-oxidation; F:oxidoreductase activity; F:catalytic activity; F:3-hydroxyacyl-CoA dehydrogenase activity; C:mitochondrion; P:lipid metabolic process; P:oxidation-reductio…
AgB01_g476_t01	---NA---	516
AgB01_g477_t01	3 -5 exoribonuclease CSL4	752	20	0	68	10	C:GO:0000176; C:GO:0005634; F:GO:0005515; F:GO:0003723; C:GO:0005737; F:GO:0046872; P:GO:0006396; P:GO:0006364; C:GO:0005730; C:GO:0000178	C:nuclear exosome (RNase complex); C:nucleus; F:protein binding; F:RNA binding; C:cytoplasm; F:metal ion binding; P:RNA processing; P:rRNA processing; C:nucleolus; C:exosome (RNase complex)
AgB01_g478_t02	26S proteasome non-ATPase regulatory subunit 9	203	20	6.21247e-115	67.6	6	C:GO:0005634; C:GO:0008540; C:GO:0005737; P:GO:0070682; C:GO:0000502; F:GO:0003674	C:nucleus; C:proteasome regulatory particle, base subcomplex; C:cytoplasm; P:proteasome regulatory particle assembly; C:proteasome complex; F:molecular_function
AgB01_g479_t02	Heterogeneous nuclear ribonucleo L	614	20	1.18389e-164	81.55	13	P:GO:0033120; P:GO:0006397; F:GO:0003723; F:GO:0000166; F:GO:0003676; C:GO:0005634; F:GO:0005515; F:GO:0003723; C:GO:0030529; C:GO:0016020; C:GO:0016021; C:GO:0019013; F:GO:0003729	P:positive regulation of RNA splicing; P:mRNA processing; F:RNA binding; F:nucleotide binding; F:nucleic acid binding; C:nucleus; F:protein binding; F:RNA binding; C:intracellular ribonucleoprotein complex; C:membrane; C:integral component of membrane; C:viral nucleocapsid; F:mRNA binding
AgB01_g480_t09	---NA---	125
AgB01_g481_t05	---NA---	256
AgB01_g482_t05	Serine threonine- phosphatase 2A regulatory subunit B subunit beta	971	20	0	70.95	11	F:GO:0004722; P:GO:0007050; F:GO:0004721; C:GO:0005634; F:GO:0005515; F:GO:0046872; F:GO:0005509; P:GO:0006470; P:GO:0043666; C:GO:0000159; C:GO:0005654	F:protein serine/threonine phosphatase activity; P:cell cycle arrest; F:phosphoprotein phosphatase activity; C:nucleus; F:protein binding; F:metal ion binding; F:calcium ion binding; P:protein dephosphorylation; P:regulation of phosphoprotein phosphatase activity; C:protein phosphatase type 2A complex; C:nucleoplasm
AgB01_g483_t01	---NA---	102
AgB01_g484_t02	E3 ubiquitin- ligase RNF19A	735	20	0	65.7	19	F:GO:0061630; F:GO:0008270; P:GO:0000209; P:GO:0002250; P:GO:0042787; P:GO:0002376; F:GO:0004842; F:GO:0031624; C:GO:0044194; F:GO:0005515; C:GO:0000151; C:GO:0005737; F:GO:0046872; C:GO:0016020; C:GO:0016021; C:GO:0005829; P:GO:0032436; F:GO:0016874; P:GO:0016567	F:ubiquitin protein ligase activity; F:zinc ion binding; P:protein polyubiquitination; P:adaptive immune response; P:protein ubiquitination involved in ubiquitin-dependent protein catabolic process; P:immune system process; F:ubiquitin-protein transferase activity; F:ubiquitin conjugating enzyme binding; C:cytolytic granule; F:protein binding; C:ubiquitin ligase complex; C:cytoplasm; F:metal ion …
AgB01_g485_t01	---NA---	146
AgB01_g486_t02	DTW domain-containing 1-like	432	20	0	66.45	2	C:GO:0016020; C:GO:0016021	C:membrane; C:integral component of membrane
AgB01_g487_t01	---NA---	189
AgB01_g488_t01	mitochondrial twinkle	594	20	0	56.05	20	P:GO:0006390; P:GO:0006260; P:GO:0051260; P:GO:0006264; F:GO:0002020; F:GO:0004386; P:GO:0006268; P:GO:0007005; F:GO:0043139; F:GO:0003697; C:GO:0042645; F:GO:0000166; F:GO:0005524; F:GO:0003678; C:GO:0005759; P:GO:0071333; P:GO:0032508; C:GO:0005739; P:GO:0034214; F:GO:0016787	P:transcription from mitochondrial promoter; P:DNA replication; P:protein homooligomerization; P:mitochondrial DNA replication; F:protease binding; F:helicase activity; P:DNA unwinding involved in DNA replication; P:mitochondrion organization; F:5'-3' DNA helicase activity; F:single-stranded DNA binding; C:mitochondrial nucleoid; F:nucleotide binding; F:ATP binding; F:DNA helicase activity; C:mit…
AgB01_g489_t01	Galactokinase 1	416	20	0	54.1	21	P:GO:0008152; P:GO:0006012; P:GO:0046835; P:GO:0061623; F:GO:0004335; F:GO:0005534; F:GO:0000166; P:GO:0005975; F:GO:0005524; F:GO:0005515; C:GO:0070062; C:GO:0005737; C:GO:0016020; P:GO:0019388; C:GO:0005829; P:GO:0033499; P:GO:0016310; F:GO:0016740; F:GO:0016773; P:GO:0019402; F:GO:0016301	P:metabolic process; P:galactose metabolic process; P:carbohydrate phosphorylation; P:glycolytic process from galactose; F:galactokinase activity; F:galactose binding; F:nucleotide binding; P:carbohydrate metabolic process; F:ATP binding; F:protein binding; C:extracellular exosome; C:cytoplasm; C:membrane; P:galactose catabolic process; C:cytosol; P:galactose catabolic process via UDP-galactose; …
AgB01_g490_t09	TBC1 domain family member 2B	659	20	0	55.4	7	P:GO:0031338; P:GO:0090630; F:GO:0005096; C:GO:0012505; P:GO:0006886; F:GO:0017137; C:GO:0005622	P:regulation of vesicle fusion; P:activation of GTPase activity; F:GTPase activator activity; C:endomembrane system; P:intracellular protein transport; F:Rab GTPase binding; C:intracellular
AgB01_g491_t05	scabrous	664	20	0	53.7	12	P:GO:0008407; P:GO:0016318; P:GO:0046331; P:GO:0007460; P:GO:0007399; P:GO:0097305; P:GO:0045468; P:GO:0008587; P:GO:0016321; C:GO:0005576; F:GO:0004871; P:GO:0048749	P:chaeta morphogenesis; P:ommatidial rotation; P:lateral inhibition; P:R8 cell fate commitment; P:nervous system development; P:response to alcohol; P:regulation of R8 cell spacing in compound eye; P:imaginal disc-derived wing margin morphogenesis; P:female meiosis chromosome segregation; C:extracellular region; F:signal transducer activity; P:compound eye development
AgB01_g492_t03	discoidin domain receptor member 1	848	20	0	62.4	40	P:GO:0044319; P:GO:0018108; P:GO:0008045; P:GO:0008285; P:GO:0007399; P:GO:0046777; P:GO:0060444; C:GO:0043204; P:GO:0006468; C:GO:0042995; F:GO:0000166; F:GO:0005524; C:GO:0005887; F:GO:0004713; C:GO:0070062; P:GO:0060749; F:GO:0004714; P:GO:0010715; P:GO:0016310; C:GO:0030424; F:GO:0038062; P:GO:0007169; P:GO:0038083; F:GO:0004672; C:GO:0043235; P:GO:0038063; P:GO:0061302; P:GO:0007566; C:GO:00…	P:wound healing, spreading of cells; P:peptidyl-tyrosine phosphorylation; P:motor neuron axon guidance; P:negative regulation of cell proliferation; P:nervous system development; P:protein autophosphorylation; P:branching involved in mammary gland duct morphogenesis; C:perikaryon; P:protein phosphorylation; C:cell projection; F:nucleotide binding; F:ATP binding; C:integral component of plasma mem…
AgB01_g493_t01	---NA---	108
AgB01_g494_t07	beta-1,3-galactosyltransferase brn	345	20	0	57.75	14	F:GO:0016757; P:GO:0006486; F:GO:0008378; C:GO:0005794; C:GO:0000139; F:GO:0008376; C:GO:0005575; P:GO:0045747; P:GO:0009636; P:GO:0075015; P:GO:0016051; C:GO:0016020; C:GO:0016021; F:GO:0016740	F:transferase activity, transferring glycosyl groups; P:protein glycosylation; F:galactosyltransferase activity; C:Golgi apparatus; C:Golgi membrane; F:acetylgalactosaminyltransferase activity; C:cellular_component; P:positive regulation of Notch signaling pathway; P:response to toxic substance; P:formation of infection structure on or near host; P:carbohydrate biosynthetic process; C:membrane; C…
AgB01_g495_t01	Galactosyltransferase family	163	20	7.44332e-70	63	18	F:GO:0016757; P:GO:0006486; F:GO:0008378; C:GO:0000139; C:GO:0005794; F:GO:0008376; P:GO:0006397; C:GO:0005575; P:GO:0045747; P:GO:0009636; P:GO:0075015; C:GO:0005634; F:GO:0003723; C:GO:0005737; P:GO:0016051; C:GO:0016020; C:GO:0016021; F:GO:0016740	F:transferase activity, transferring glycosyl groups; P:protein glycosylation; F:galactosyltransferase activity; C:Golgi membrane; C:Golgi apparatus; F:acetylgalactosaminyltransferase activity; P:mRNA processing; C:cellular_component; P:positive regulation of Notch signaling pathway; P:response to toxic substance; P:formation of infection structure on or near host; C:nucleus; F:RNA binding; C:cyt…
AgB01_g496_t01	ns1 binding	869	20	0	55.75	3	F:GO:0004842; C:GO:0031463; P:GO:0016567	F:ubiquitin-protein transferase activity; C:Cul3-RING ubiquitin ligase complex; P:protein ubiquitination
AgB01_g497_t02	---NA---	66
AgB01_g498_t01	hypothetical protein Bm1_33475	446	3	1.54713e-52	78
AgB01_g499_t04	---NA---	122
AgB01_g500_t02	---NA---	246
AgB01_g501_t04	---NA---	217
AgB01_g502_t01	---NA---	143
AgB01_g503_t01	BRICHOS domain	233	20	6.11893e-86	56.4	8	C:GO:0070062; C:GO:0016020; C:GO:0016021; P:GO:0007399; C:GO:0005794; P:GO:0042985; F:GO:0001540; C:GO:0005886	C:extracellular exosome; C:membrane; C:integral component of membrane; P:nervous system development; C:Golgi apparatus; P:negative regulation of amyloid precursor protein biosynthetic process; F:beta-amyloid binding; C:plasma membrane
AgB01_g504_t02	---NA---	118
AgB01_g505_t01	---NA---	101
AgB01_g506_t01	---NA---	134
AgB01_g507_t01	Arylacetamide deacetylase	154	20	2.29338e-88	60.75	6	P:GO:0009056; P:GO:0008152; C:GO:0016020; C:GO:0016021; F:GO:0052689; F:GO:0016787	P:catabolic process; P:metabolic process; C:membrane; C:integral component of membrane; F:carboxylic ester hydrolase activity; F:hydrolase activity
AgB01_g508_t01	elegans ly confirmed by transcript evidence	282	17	0	52.76	5	P:GO:0006935; P:GO:0019915; C:GO:0016020; C:GO:0016021; C:GO:0035869	P:chemotaxis; P:lipid storage; C:membrane; C:integral component of membrane; C:ciliary transition zone
AgB01_g509_t02	PAG-3	356	20	0	70	18	P:GO:0046929; P:GO:0030097; P:GO:0006355; P:GO:0043059; P:GO:0043058; P:GO:0045664; P:GO:0046676; F:GO:0001106; P:GO:0060216; P:GO:0000122; F:GO:0003676; C:GO:0005634; P:GO:0030218; F:GO:0046872; P:GO:0043066; P:GO:0030099; P:GO:0051569; P:GO:0014018	P:negative regulation of neurotransmitter secretion; P:hemopoiesis; P:regulation of transcription, DNA-templated; P:regulation of forward locomotion; P:regulation of backward locomotion; P:regulation of neuron differentiation; P:negative regulation of insulin secretion; F:RNA polymerase II transcription corepressor activity; P:definitive hemopoiesis; P:negative regulation of transcription from RN…
AgB01_g510_t01	Mpv17	113	20	6.93359e-63	65.65	13	P:GO:0048839; C:GO:0005743; P:GO:0000002; P:GO:0007605; P:GO:0032836; P:GO:0072593; C:GO:0005777; P:GO:0042592; C:GO:0005739; C:GO:0016020; C:GO:0016021; P:GO:2000377; P:GO:0034614	P:inner ear development; C:mitochondrial inner membrane; P:mitochondrial genome maintenance; P:sensory perception of sound; P:glomerular basement membrane development; P:reactive oxygen species metabolic process; C:peroxisome; P:homeostatic process; C:mitochondrion; C:membrane; C:integral component of membrane; P:regulation of reactive oxygen species metabolic process; P:cellular response to reac…
AgB01_g511_t01	hypothetical protein Bm1_32055	890	2	1.25861e-78	63	1	C:GO:0016021	C:integral component of membrane
AgB01_g512_t14	esterase lipase	108	20	5.01506e-74	67.8	7	F:GO:0008528; P:GO:0007186; P:GO:0008152; C:GO:0016020; C:GO:0016021; F:GO:0052689; F:GO:0016787	F:G-protein coupled peptide receptor activity; P:G-protein coupled receptor signaling pathway; P:metabolic process; C:membrane; C:integral component of membrane; F:carboxylic ester hydrolase activity; F:hydrolase activity
AgB01_g513_t01	---NA---	146
AgB01_g514_t01	elegans confirmed by transcript evidence	656	20	1.55733e-47	61	3	F:GO:0000166; F:GO:0003676; P:GO:0009792	F:nucleotide binding; F:nucleic acid binding; P:embryo development ending in birth or egg hatching
AgB01_g515_t01	Multidrug resistance-associated 1	396	20	0	69.15	14	F:GO:0016887; P:GO:0007040; F:GO:0042626; P:GO:0055085; C:GO:0044840; P:GO:0006810; F:GO:0005215; F:GO:0000166; C:GO:0030139; F:GO:0005524; P:GO:0051597; C:GO:0016020; C:GO:0016021; P:GO:0010877	F:ATPase activity; P:lysosome organization; F:ATPase activity, coupled to transmembrane movement of substances; P:transmembrane transport; C:gut granule; P:transport; F:transporter activity; F:nucleotide binding; C:endocytic vesicle; F:ATP binding; P:response to methylmercury; C:membrane; C:integral component of membrane; P:lipid transport involved in lipid storage
AgB01_g516_t01	flagellar inner arm dynein light chain p28	78	20	2.76075e-25	83.45	14	C:GO:0036156; P:GO:0060294; P:GO:0030030; F:GO:0045504; C:GO:0042995; P:GO:0006313; F:GO:0003774; C:GO:0031514; C:GO:0005856; F:GO:0004803; C:GO:0005737; C:GO:0030286; C:GO:0005929; P:GO:0036159	C:inner dynein arm; P:cilium movement involved in cell motility; P:cell projection organization; F:dynein heavy chain binding; C:cell projection; P:transposition, DNA-mediated; F:motor activity; C:motile cilium; C:cytoskeleton; F:transposase activity; C:cytoplasm; C:dynein complex; C:cilium; P:inner dynein arm assembly
AgB01_g517_t04	Calcium binding EGF domain containing	1438	20	0	50.65	7	C:GO:0045177; C:GO:0005737; P:GO:0002119; P:GO:0040011; F:GO:0005509; C:GO:0016020; C:GO:0016021	C:apical part of cell; C:cytoplasm; P:nematode larval development; P:locomotion; F:calcium ion binding; C:membrane; C:integral component of membrane
AgB01_g518_t01	---NA---	44
AgB01_g519_t01	---NA---	127
AgB01_g520_t01	---NA---	106
AgB01_g521_t01	elegans confirmed by transcript evidence	149	20	1.12652e-51	54.95	1	F:GO:0046872	F:metal ion binding
AgB01_g522_t03	hypothetical protein LOAG_03321	215	1	1.55007e-23	61	2	C:GO:0016020; C:GO:0016021	C:membrane; C:integral component of membrane
AgB01_g523_t04	Unknown	110	7	4.05659e-77	70.86	10	P:GO:0040035; P:GO:0002119; P:GO:0009792; P:GO:0008340; C:GO:0016020; C:GO:0016021; P:GO:0006898; P:GO:0016246; P:GO:0040007; P:GO:0000003	P:hermaphrodite genitalia development; P:nematode larval development; P:embryo development ending in birth or egg hatching; P:determination of adult lifespan; C:membrane; C:integral component of membrane; P:receptor-mediated endocytosis; P:RNA interference; P:growth; P:reproduction
AgB01_g524_t04	Oxysterol-binding -related 1	411	20	0	62.85	8	P:GO:0006869; P:GO:0019915; C:GO:0070062; P:GO:0009792; C:GO:0005770; F:GO:0008289; P:GO:0006810; C:GO:0005654	P:lipid transport; P:lipid storage; C:extracellular exosome; P:embryo development ending in birth or egg hatching; C:late endosome; F:lipid binding; P:transport; C:nucleoplasm
AgB01_g525_t02	---NA---	90
AgB01_g526_t04	signal transducing adaptor molecule (SH3 domain and ITAM motif) 1	393	20	0	61.2	32	F:GO:0005070; P:GO:0043409; P:GO:0007275; P:GO:1903543; F:GO:0008022; P:GO:0009792; P:GO:0015031; P:GO:0042059; P:GO:0006886; C:GO:0042995; P:GO:0034606; C:GO:0005769; C:GO:0005768; F:GO:0043130; P:GO:0006914; C:GO:0005929; P:GO:0016197; C:GO:0005829; P:GO:0007165; P:GO:1903551; P:GO:0008333; P:GO:0009967; P:GO:0006810; C:GO:0005622; C:GO:0031901; F:GO:0005515; P:GO:0097499; C:GO:0005737; P:GO:00…	F:SH3/SH2 adaptor activity; P:negative regulation of MAPK cascade; P:multicellular organism development; P:positive regulation of exosomal secretion; F:protein C-terminus binding; P:embryo development ending in birth or egg hatching; P:protein transport; P:negative regulation of epidermal growth factor receptor signaling pathway; P:intracellular protein transport; C:cell projection; P:response to…
AgB01_g527_t04	---NA---	194
AgB01_g528_t01	---NA---	191
AgB01_g529_t01	---NA---	133
AgB01_g530_t04	melatonin receptor type 1A	326	20	0	63.9	24	P:GO:0007271; F:GO:0035100; P:GO:0046959; P:GO:0007186; P:GO:0040011; F:GO:0035240; P:GO:0035075; P:GO:0042594; P:GO:0007212; P:GO:0007213; P:GO:0009267; P:GO:0043410; P:GO:0008306; F:GO:0008227; P:GO:0009744; P:GO:0045471; C:GO:0005887; F:GO:0004930; F:GO:0001588; P:GO:0001963; C:GO:0016020; C:GO:0016021; P:GO:0010579; P:GO:0071329	P:synaptic transmission, cholinergic; F:ecdysone binding; P:habituation; P:G-protein coupled receptor signaling pathway; P:locomotion; F:dopamine binding; P:response to ecdysone; P:response to starvation; P:dopamine receptor signaling pathway; P:G-protein coupled acetylcholine receptor signaling pathway; P:cellular response to starvation; P:positive regulation of MAPK cascade; P:associative learn…
AgB01_g531_t14	---NA---	342
AgB01_g532_t01	---NA---	167
AgB01_g533_t09	F-box WD repeat-containing 1A	344	20	2.31631e-163	67.7	42	P:GO:0045849; P:GO:0007293; P:GO:0008285; P:GO:0008588; P:GO:0030708; P:GO:0007298; P:GO:0046599; P:GO:0060623; P:GO:0008589; P:GO:0007611; P:GO:0007309; P:GO:0030727; P:GO:0045475; P:GO:0030707; P:GO:0045451; C:GO:0019005; P:GO:0032007; P:GO:2000114; P:GO:0030720; P:GO:0060253; P:GO:0007088; P:GO:0030162; P:GO:0046843; P:GO:0008355; F:GO:0046983; P:GO:0090162; P:GO:0007623; P:GO:0007304; P:GO:00…	P:negative regulation of nurse cell apoptotic process; P:germarium-derived egg chamber formation; P:negative regulation of cell proliferation; P:release of cytoplasmic sequestered NF-kappaB; P:germarium-derived female germ-line cyst encapsulation; P:border follicle cell migration; P:regulation of centriole replication; P:regulation of chromosome condensation; P:regulation of smoothened signaling …
AgB01_g534_t01	endonuclease-reverse transcriptase	129	20	5.29939e-27	58.35	4	P:GO:0090305; F:GO:0003964; F:GO:0004519; P:GO:0006278	P:nucleic acid phosphodiester bond hydrolysis; F:RNA-directed DNA polymerase activity; F:endonuclease activity; P:RNA-dependent DNA biosynthetic process
AgB01_g535_t01	---NA---	208
AgB01_g536_t01	ADAM 17-like protease	368	20	0	66.3	9	F:GO:0008270; P:GO:0007229; P:GO:0006508; C:GO:0016020; C:GO:0016021; F:GO:0008233; F:GO:0004222; F:GO:0008237; F:GO:0016787	F:zinc ion binding; P:integrin-mediated signaling pathway; P:proteolysis; C:membrane; C:integral component of membrane; F:peptidase activity; F:metalloendopeptidase activity; F:metallopeptidase activity; F:hydrolase activity
AgB01_g537_t04	Glutaminase	707	20	0	71.95	7	F:GO:0004359; P:GO:0006537; C:GO:0005759; C:GO:0005739; P:GO:0006541; P:GO:0006543; F:GO:0016787	F:glutaminase activity; P:glutamate biosynthetic process; C:mitochondrial matrix; C:mitochondrion; P:glutamine metabolic process; P:glutamine catabolic process; F:hydrolase activity
AgB01_g538_t01	5 -AMP-activated beta complex-interacting region containing	282	20	1.11647e-174	72.3	5	P:GO:0045859; P:GO:0007165; P:GO:0016310; F:GO:0016301; C:GO:0031588	P:regulation of protein kinase activity; P:signal transduction; P:phosphorylation; F:kinase activity; C:nucleotide-activated protein kinase complex
AgB01_g539_t01	---NA---	82
AgB01_g540_t02	Proton myo-inositol cotransporter	593	20	0	70.6	17	P:GO:0055085; P:GO:0015992; F:GO:0022857; P:GO:0008643; F:GO:0005351; P:GO:0046323; F:GO:0005355; P:GO:0006810; F:GO:0005215; P:GO:1904659; C:GO:0005887; F:GO:0022891; C:GO:0009925; C:GO:0016020; C:GO:0016021; P:GO:0035428; C:GO:0016324	P:transmembrane transport; P:proton transport; F:transmembrane transporter activity; P:carbohydrate transport; F:sugar:proton symporter activity; P:glucose import; F:glucose transmembrane transporter activity; P:transport; F:transporter activity; P:glucose transmembrane transport; C:integral component of plasma membrane; F:substrate-specific transmembrane transporter activity; C:basal plasma memb…
AgB01_g541_t01	hypothetical protein CAEBREN_02392	215	6	1.78876e-39	60.67	2	C:GO:0016020; C:GO:0016021	C:membrane; C:integral component of membrane
AgB01_g542_t02	Organic cation transporter	273	20	0	48.7	23	P:GO:0055085; P:GO:0015992; P:GO:0015695; F:GO:0022857; P:GO:0009792; F:GO:0005275; F:GO:0005351; F:GO:0015491; P:GO:0046323; F:GO:0005355; F:GO:0005215; P:GO:0009437; P:GO:1904659; P:GO:1902603; C:GO:0005887; F:GO:0022891; P:GO:0002119; C:GO:0016020; C:GO:0016021; P:GO:0015837; P:GO:0072337; P:GO:0035428; F:GO:0015226	P:transmembrane transport; P:proton transport; P:organic cation transport; F:transmembrane transporter activity; P:embryo development ending in birth or egg hatching; F:amine transmembrane transporter activity; F:sugar:proton symporter activity; F:cation:cation antiporter activity; P:glucose import; F:glucose transmembrane transporter activity; F:transporter activity; P:carnitine metabolic proces…
AgB01_g543_t01	Solute carrier family 22 member 3	150	20	2.37462e-85	54.35	35	P:GO:0015697; P:GO:0015872; P:GO:0015695; P:GO:0015992; F:GO:0015651; P:GO:0032098; P:GO:0051608; P:GO:0009792; F:GO:0005351; F:GO:0005355; F:GO:0005215; P:GO:1904659; C:GO:0005887; F:GO:0005329; P:GO:0006811; P:GO:0006855; P:GO:0072488; P:GO:0002119; P:GO:0098779; P:GO:0015844; P:GO:0055085; F:GO:0015101; F:GO:0022857; P:GO:0046323; P:GO:1901998; P:GO:0006810; F:GO:0008514; C:GO:0005886; F:GO:00…	P:quaternary ammonium group transport; P:dopamine transport; P:organic cation transport; P:proton transport; F:quaternary ammonium group transmembrane transporter activity; P:regulation of appetite; P:histamine transport; P:embryo development ending in birth or egg hatching; F:sugar:proton symporter activity; F:glucose transmembrane transporter activity; F:transporter activity; P:glucose transmem…
AgB01_g544_t03	---NA---	186
AgB01_g545_t01	---NA---	102
AgB01_g546_t01	elegans ly confirmed by transcript evidence	421	20	4.67162e-100	51.55	11	F:GO:0004930; C:GO:0005887; F:GO:0008528; P:GO:0007218; F:GO:0008188; P:GO:0007186; P:GO:0007165; C:GO:0016020; C:GO:0016021; F:GO:0004871; F:GO:0004983	F:G-protein coupled receptor activity; C:integral component of plasma membrane; F:G-protein coupled peptide receptor activity; P:neuropeptide signaling pathway; F:neuropeptide receptor activity; P:G-protein coupled receptor signaling pathway; P:signal transduction; C:membrane; C:integral component of membrane; F:signal transducer activity; F:neuropeptide Y receptor activity
AgB01_g547_t01	somatostatin receptor	489	20	0	61.35	19	P:GO:0038003; F:GO:0042923; P:GO:0019915; P:GO:0007186; P:GO:0007165; P:GO:0007187; P:GO:0006468; F:GO:0004871; C:GO:0043005; P:GO:0038170; F:GO:0004994; F:GO:0050254; F:GO:0004930; F:GO:0004985; C:GO:0005887; P:GO:0007218; C:GO:0016020; C:GO:0016021; F:GO:0016740	P:opioid receptor signaling pathway; F:neuropeptide binding; P:lipid storage; P:G-protein coupled receptor signaling pathway; P:signal transduction; P:G-protein coupled receptor signaling pathway, coupled to cyclic nucleotide second messenger; P:protein phosphorylation; F:signal transducer activity; C:neuron projection; P:somatostatin signaling pathway; F:somatostatin receptor activity; F:rhodops…
AgB01_g548_t01	endonuclease-reverse transcriptase	630	20	0	54.3	4	P:GO:0090305; F:GO:0003964; F:GO:0004519; P:GO:0006278	P:nucleic acid phosphodiester bond hydrolysis; F:RNA-directed DNA polymerase activity; F:endonuclease activity; P:RNA-dependent DNA biosynthetic process
AgB01_g549_t01	---NA---	208
AgB01_g550_t01	hypothetical protein CRE_10181	99	1	1.737e-06	61	8	F:GO:0003677; C:GO:0005634; F:GO:0003700; F:GO:0008270; F:GO:0046872; P:GO:0006351; P:GO:0006355; F:GO:0043565	F:DNA binding; C:nucleus; F:transcription factor activity, sequence-specific DNA binding; F:zinc ion binding; F:metal ion binding; P:transcription, DNA-templated; P:regulation of transcription, DNA-templated; F:sequence-specific DNA binding
AgB01_g551_t01	elegans ly confirmed by transcript evidence	284	1	3.62021e-08	58	4	C:GO:0005581; C:GO:0016020; C:GO:0016021; F:GO:0042302	C:collagen trimer; C:membrane; C:integral component of membrane; F:structural constituent of cuticle
AgB01_g552_t01	---NA---	115
AgB01_g553_t01	elegans confirmed by transcript evidence	570	20	0	88	7	C:GO:0005737; P:GO:0002119; P:GO:0009792; F:GO:0005198; C:GO:0005882; P:GO:0007126; P:GO:0040007	C:cytoplasm; P:nematode larval development; P:embryo development ending in birth or egg hatching; F:structural molecule activity; C:intermediate filament; P:meiotic nuclear division; P:growth
AgB01_g554_t01	hypothetical protein LOAG_06270	344	14	2.64539e-99	43.86	4	F:GO:0004930; P:GO:0007186; C:GO:0016020; C:GO:0016021	F:G-protein coupled receptor activity; P:G-protein coupled receptor signaling pathway; C:membrane; C:integral component of membrane
AgB01_g555_t03	---NA---	122
AgB01_g556_t03	Terminal uridylyltransferase 4	230	1	1.20976e-110	80	2	F:GO:0016779; F:GO:0016740	F:nucleotidyltransferase activity; F:transferase activity
AgB01_g557_t04	hypothetical protein LOAG_00691	332	4	1.0241e-16	45.75
AgB01_g558_t01	Nematode cuticle collagen N-terminal domain containing	307	20	1.13712e-28	61.9	10	P:GO:0006979; F:GO:0042329; P:GO:0071470; P:GO:0009650; C:GO:0005581; P:GO:0010171; C:GO:0016020; C:GO:0016021; F:GO:0042302; C:GO:0071944	P:response to oxidative stress; F:structural constituent of collagen and cuticulin-based cuticle; P:cellular response to osmotic stress; P:UV protection; C:collagen trimer; P:body morphogenesis; C:membrane; C:integral component of membrane; F:structural constituent of cuticle; C:cell periphery
AgB01_g559_t01	---NA---	285
AgB01_g560_t02	Collagen triple helix repeat-containing	858	10	4.26122e-33	31.6	5	F:GO:0003824; C:GO:0016020; C:GO:0016021; P:GO:0009405; C:GO:0019867	F:catalytic activity; C:membrane; C:integral component of membrane; P:pathogenesis; C:outer membrane
AgB01_g561_t02	Collagen triple helix repeat-containing	852	2	1.44132e-06	32	1	F:GO:0003824	F:catalytic activity
AgB01_g562_t01	hypothetical protein LOAG_09249	285	5	1.44793e-15	67.6
AgB01_g563_t01	---NA---	102
AgB01_g564_t04	Uridine diphosphate glucose pyrophosphatase	559	14	1.8218e-31	52.29	1	F:GO:0016787	F:hydrolase activity
AgB01_g565_t07	---NA---	190
AgB01_g566_t01	Zinc C2H2 type family	270	20	0	79.2	3	F:GO:0003676; F:GO:0046872; P:GO:0007411	F:nucleic acid binding; F:metal ion binding; P:axon guidance
AgB01_g567_t01	hypothetical protein E04A4.6	398	5	6.48767e-10	42.4	2	C:GO:0016020; C:GO:0016021	C:membrane; C:integral component of membrane
AgB01_g568_t02	Cysteine PRotease related family member (cpr-6)	441	20	1.8736e-60	51.1	15	P:GO:0040011; P:GO:0008340; F:GO:0004197; F:GO:0008234; F:GO:0008233; C:GO:0005764; C:GO:0005615; P:GO:0002119; C:GO:0016020; P:GO:0006508; P:GO:0050790; C:GO:0016021; P:GO:0051603; P:GO:0032940; F:GO:0016787	P:locomotion; P:determination of adult lifespan; F:cysteine-type endopeptidase activity; F:cysteine-type peptidase activity; F:peptidase activity; C:lysosome; C:extracellular space; P:nematode larval development; C:membrane; P:proteolysis; P:regulation of catalytic activity; C:integral component of membrane; P:proteolysis involved in cellular protein catabolic process; P:secretion by cell; F:hydr…
AgB01_g569_t04	sodium hydrogen exchanger 3 family	215	20	8.64035e-64	61	18	P:GO:0055085; F:GO:0015299; F:GO:0015297; F:GO:0015385; P:GO:0040011; P:GO:0009792; P:GO:1902600; P:GO:0006810; P:GO:0006873; P:GO:0006885; P:GO:0006814; P:GO:0006811; P:GO:0006812; P:GO:0001745; C:GO:0016020; C:GO:0016021; P:GO:0035725; P:GO:0030641	P:transmembrane transport; F:solute:proton antiporter activity; F:antiporter activity; F:sodium:proton antiporter activity; P:locomotion; P:embryo development ending in birth or egg hatching; P:hydrogen ion transmembrane transport; P:transport; P:cellular ion homeostasis; P:regulation of pH; P:sodium ion transport; P:ion transport; P:cation transport; P:compound eye morphogenesis; C:membrane; C:i…
AgB01_g570_t01	---NA---	108
AgB01_g571_t09	Alpha-1,3-mannosyl-glyco 4-beta-N-acetylglucosaminyltransferase A	522	20	0	59.55	16	F:GO:0016757; F:GO:0016758; F:GO:0008375; P:GO:0006491; P:GO:0006486; P:GO:0006487; F:GO:0008454; C:GO:0000139; C:GO:0005794; C:GO:0005576; P:GO:0005975; C:GO:0070062; F:GO:0046872; C:GO:0016020; C:GO:0016021; F:GO:0016740	F:transferase activity, transferring glycosyl groups; F:transferase activity, transferring hexosyl groups; F:acetylglucosaminyltransferase activity; P:N-glycan processing; P:protein glycosylation; P:protein N-linked glycosylation; F:alpha-1,3-mannosylglycoprotein 4-beta-N-acetylglucosaminyltransferase activity; C:Golgi membrane; C:Golgi apparatus; C:extracellular region; P:carbohydrate metabolic …
AgB01_g572_t01	---NA---	148
AgB01_g573_t07	tRNA guanosine-2 -O-methyltransferase TRM11 homolog	445	20	0	61.6	9	F:GO:0003676; F:GO:0003723; P:GO:0008033; F:GO:0008168; F:GO:0004809; F:GO:0016740; P:GO:0030488; F:GO:0000049; P:GO:0032259	F:nucleic acid binding; F:RNA binding; P:tRNA processing; F:methyltransferase activity; F:tRNA (guanine-N2-)-methyltransferase activity; F:transferase activity; P:tRNA methylation; F:tRNA binding; P:methylation
AgB01_g574_t09	Esterase	565	20	0	61.95	8	C:GO:0005615; P:GO:0019915; P:GO:0002119; P:GO:0009792; P:GO:0008152; F:GO:0004104; P:GO:0000003; F:GO:0016787	C:extracellular space; P:lipid storage; P:nematode larval development; P:embryo development ending in birth or egg hatching; P:metabolic process; F:cholinesterase activity; P:reproduction; F:hydrolase activity
AgB01_g575_t02	Uncharacterized aminotransferase SSO0104	300	20	0	56.05	5	F:GO:0030170; F:GO:0003824; F:GO:0008483; P:GO:0009058; F:GO:0016740	F:pyridoxal phosphate binding; F:catalytic activity; F:transaminase activity; P:biosynthetic process; F:transferase activity
AgB01_g576_t01	uncharacterized aminotransferase SSO0104-like	118	20	1.71211e-65	59.1	5	F:GO:0030170; F:GO:0003824; F:GO:0008483; P:GO:0009058; F:GO:0016740	F:pyridoxal phosphate binding; F:catalytic activity; F:transaminase activity; P:biosynthetic process; F:transferase activity
AgB01_g577_t06	Innexin unc-9	158	20	3.22401e-96	57.35	14	P:GO:0055085; P:GO:0040035; P:GO:0040011; F:GO:0055077; F:GO:0005243; P:GO:0006810; C:GO:0005886; P:GO:0000003; C:GO:0005921; P:GO:0006811; P:GO:0002119; C:GO:0016020; C:GO:0016021; C:GO:0030054	P:transmembrane transport; P:hermaphrodite genitalia development; P:locomotion; F:gap junction hemi-channel activity; F:gap junction channel activity; P:transport; C:plasma membrane; P:reproduction; C:gap junction; P:ion transport; P:nematode larval development; C:membrane; C:integral component of membrane; C:cell junction
AgB01_g578_t01	maleylacetoacetate isomerase	218	20	9.23485e-162	69.05	12	F:GO:0004602; P:GO:0006559; P:GO:0009072; C:GO:0005737; F:GO:0003824; P:GO:0006749; C:GO:0005739; P:GO:0098869; F:GO:0016034; F:GO:0004364; F:GO:0016740; F:GO:0016853	F:glutathione peroxidase activity; P:L-phenylalanine catabolic process; P:aromatic amino acid family metabolic process; C:cytoplasm; F:catalytic activity; P:glutathione metabolic process; C:mitochondrion; P:cellular oxidant detoxification; F:maleylacetoacetate isomerase activity; F:glutathione transferase activity; F:transferase activity; F:isomerase activity
AgB01_g579_t01	---NA---	59
AgB01_g580_t04	hypothetical protein Bm1_33820	261	1	2.26278e-05	48
AgB01_g581_t01	alpha 8 like 3	459	20	0	73.6	31	P:GO:0035046; P:GO:0007010; P:GO:0007052; P:GO:0009792; P:GO:0008104; P:GO:0042552; C:GO:0043025; P:GO:0040039; P:GO:0009612; C:GO:0005874; P:GO:0007017; F:GO:0005525; P:GO:0051642; F:GO:0000166; C:GO:0070062; P:GO:0002119; F:GO:0003924; P:GO:0001966; P:GO:0032465; P:GO:0050954; C:GO:0030424; P:GO:0007281; P:GO:0007067; F:GO:0005200; P:GO:0021782; P:GO:0000003; P:GO:0007638; P:GO:0000132; C:GO:00…	P:pronuclear migration; P:cytoskeleton organization; P:mitotic spindle organization; P:embryo development ending in birth or egg hatching; P:protein localization; P:myelination; C:neuronal cell body; P:inductive cell migration; P:response to mechanical stimulus; C:microtubule; P:microtubule-based process; F:GTP binding; P:centrosome localization; F:nucleotide binding; C:extracellular exosome; P:n…
AgB01_g582_t05	zwilch homolog	644	20	0	44.55	18	P:GO:0007062; P:GO:0007093; P:GO:0007275; P:GO:0009792; P:GO:0007067; C:GO:0000777; C:GO:0005694; C:GO:0000776; C:GO:0000775; P:GO:0007049; P:GO:0051301; P:GO:0051321; F:GO:0005515; C:GO:1990423; C:GO:0005737; C:GO:0005938; P:GO:0034501; C:GO:0005829	P:sister chromatid cohesion; P:mitotic cell cycle checkpoint; P:multicellular organism development; P:embryo development ending in birth or egg hatching; P:mitotic nuclear division; C:condensed chromosome kinetochore; C:chromosome; C:kinetochore; C:chromosome, centromeric region; P:cell cycle; P:cell division; P:meiotic cell cycle; F:protein binding; C:RZZ complex; C:cytoplasm; C:cell cortex; P:p…
AgB01_g583_t01	hypothetical protein LOAG_04535	190	2	4.38379e-33	60
AgB01_g584_t01	HD domain-containing 2	188	20	6.2169e-140	69.6
AgB01_g585_t05	---NA---	123
AgB01_g586_t04	large subunit ribosomal 10	214	20	2.43293e-159	92.65	10	F:GO:0003735; C:GO:0030529; P:GO:0002119; P:GO:0009792; C:GO:0022625; P:GO:0000027; C:GO:0005840; C:GO:0005622; P:GO:0000003; P:GO:0006412	F:structural constituent of ribosome; C:intracellular ribonucleoprotein complex; P:nematode larval development; P:embryo development ending in birth or egg hatching; C:cytosolic large ribosomal subunit; P:ribosomal large subunit assembly; C:ribosome; C:intracellular; P:reproduction; P:translation
AgB01_g587_t09	Glycosyl hydrolases family 31	450	20	0	73.05	15	P:GO:0008152; P:GO:1902600; P:GO:0005980; F:GO:0004553; C:GO:0005764; P:GO:0005975; F:GO:0004129; F:GO:0004558; F:GO:0003824; C:GO:0005739; C:GO:0016020; C:GO:0016021; F:GO:0030246; F:GO:0016787; F:GO:0016798	P:metabolic process; P:hydrogen ion transmembrane transport; P:glycogen catabolic process; F:hydrolase activity, hydrolyzing O-glycosyl compounds; C:lysosome; P:carbohydrate metabolic process; F:cytochrome-c oxidase activity; F:alpha-1,4-glucosidase activity; F:catalytic activity; C:mitochondrion; C:membrane; C:integral component of membrane; F:carbohydrate binding; F:hydrolase activity; F:hydrol…
AgB01_g588_t01	Structural maintenance of chromosomes 1A	263	20	6.84153e-175	69.4	49	P:GO:0006281; P:GO:0040035; P:GO:0007093; P:GO:0009792; P:GO:0042770; P:GO:0009314; P:GO:0006486; P:GO:0007059; C:GO:0005794; C:GO:0000776; C:GO:0000775; P:GO:0051321; P:GO:0002119; F:GO:0046982; P:GO:0007062; F:GO:0016757; P:GO:0019827; P:GO:0007064; P:GO:0007067; C:GO:0008278; P:GO:0006974; C:GO:0005634; F:GO:0005515; C:GO:0000790; C:GO:0030893; P:GO:0032876; P:GO:0010165; P:GO:0040011; F:GO:00…	P:DNA repair; P:hermaphrodite genitalia development; P:mitotic cell cycle checkpoint; P:embryo development ending in birth or egg hatching; P:signal transduction in response to DNA damage; P:response to radiation; P:protein glycosylation; P:chromosome segregation; C:Golgi apparatus; C:kinetochore; C:chromosome, centromeric region; P:meiotic cell cycle; P:nematode larval development; F:protein het…
AgB01_g589_t01	---NA---	402
AgB01_g590_t02	tumor suppressor candidate 4	412	20	0	60.1	12	C:GO:0005789; P:GO:0006506; P:GO:0034198; F:GO:0005096; C:GO:0016020; C:GO:0016021; F:GO:0004672; P:GO:0033673; P:GO:0032007; P:GO:0006468; C:GO:1990130; P:GO:0043547	C:endoplasmic reticulum membrane; P:GPI anchor biosynthetic process; P:cellular response to amino acid starvation; F:GTPase activator activity; C:membrane; C:integral component of membrane; F:protein kinase activity; P:negative regulation of kinase activity; P:negative regulation of TOR signaling; P:protein phosphorylation; C:Iml1 complex; P:positive regulation of GTPase activity
AgB01_g591_t10	Polymerase (RNA) III (DNA directed) polypeptide 155kDa	1358	20	0	75.35	26	P:GO:0040035; P:GO:1903146; P:GO:0006383; P:GO:0009792; C:GO:0005654; F:GO:0001056; P:GO:0002119; P:GO:0032728; C:GO:0005829; P:GO:0051607; F:GO:0016779; P:GO:0006351; P:GO:0032481; F:GO:0003682; P:GO:1903955; P:GO:0002376; C:GO:0005666; P:GO:0000003; F:GO:0003677; C:GO:0005634; F:GO:0003899; P:GO:0008406; F:GO:0046872; P:GO:0045087; C:GO:0016020; F:GO:0016740	P:hermaphrodite genitalia development; P:regulation of mitophagy; P:transcription from RNA polymerase III promoter; P:embryo development ending in birth or egg hatching; C:nucleoplasm; F:RNA polymerase III activity; P:nematode larval development; P:positive regulation of interferon-beta production; C:cytosol; P:defense response to virus; F:nucleotidyltransferase activity; P:transcription, DNA-tem…
AgB01_g592_t01	Transthyretin 5	138	20	1.8027e-98	64.35	3	C:GO:0005615; C:GO:0016020; C:GO:0016021	C:extracellular space; C:membrane; C:integral component of membrane
AgB01_g593_t03	cuticlin 1	228	20	1.48561e-143	63.05	16	F:GO:0003690; P:GO:0006355; F:GO:0008026; F:GO:0004386; F:GO:0000166; F:GO:0001046; F:GO:0003676; C:GO:0005634; F:GO:0005524; F:GO:0003678; F:GO:0043141; P:GO:0032508; C:GO:0005739; C:GO:0016020; C:GO:0016021; F:GO:0016787	F:double-stranded DNA binding; P:regulation of transcription, DNA-templated; F:ATP-dependent helicase activity; F:helicase activity; F:nucleotide binding; F:core promoter sequence-specific DNA binding; F:nucleic acid binding; C:nucleus; F:ATP binding; F:DNA helicase activity; F:ATP-dependent 5'-3' DNA helicase activity; P:DNA duplex unwinding; C:mitochondrion; C:membrane; C:integral component of …
AgB01_g594_t01	Transthyretin 5	164	20	4.5973e-38	59.15	6	P:GO:0061199; C:GO:0005634; C:GO:0005615; P:GO:0040013; C:GO:0016020; C:GO:0016021	P:striated muscle contraction involved in embryonic body morphogenesis; C:nucleus; C:extracellular space; P:negative regulation of locomotion; C:membrane; C:integral component of membrane
AgB01_g595_t01	---NA---	84
AgB01_g596_t02	elegans ly confirmed by transcript evidence	184	20	6.80525e-50	52.75	2	C:GO:0016020; C:GO:0016021	C:membrane; C:integral component of membrane
AgB01_g597_t01	Cysteine synthase	338	20	0	77.35	16	C:GO:0009570; F:GO:0030170; C:GO:0055120; F:GO:0016829; P:GO:0008652; F:GO:0004124; P:GO:0006535; C:GO:0009536; C:GO:0009509; C:GO:0009507; P:GO:0001666; C:GO:0005737; P:GO:0019344; P:GO:0071688; F:GO:0016740; F:GO:0019899	C:chloroplast stroma; F:pyridoxal phosphate binding; C:striated muscle dense body; F:lyase activity; P:cellular amino acid biosynthetic process; F:cysteine synthase activity; P:cysteine biosynthetic process from serine; C:plastid; C:chromoplast; C:chloroplast; P:response to hypoxia; C:cytoplasm; P:cysteine biosynthetic process; P:striated muscle myosin thick filament assembly; F:transferase activ…
AgB01_g598_t02	Nematode AStacin protease family member (nas-37)	213	20	1.40859e-60	53.7	13	F:GO:0008270; P:GO:0040002; P:GO:0007275; P:GO:0010171; F:GO:0008233; C:GO:0005576; F:GO:0004222; F:GO:0008237; F:GO:0046872; P:GO:0006508; P:GO:0042395; P:GO:0018996; F:GO:0016787	F:zinc ion binding; P:collagen and cuticulin-based cuticle development; P:multicellular organism development; P:body morphogenesis; F:peptidase activity; C:extracellular region; F:metalloendopeptidase activity; F:metallopeptidase activity; F:metal ion binding; P:proteolysis; P:ecdysis, collagen and cuticulin-based cuticle; P:molting cycle, collagen and cuticulin-based cuticle; F:hydrolase activity
AgB01_g599_t01	Zinc metallo ase nas-37	200	10	4.16662e-76	49.3	13	F:GO:0008270; P:GO:0040002; P:GO:0007275; P:GO:0010171; F:GO:0008233; C:GO:0005576; F:GO:0004222; F:GO:0008237; F:GO:0046872; P:GO:0006508; P:GO:0042395; P:GO:0018996; F:GO:0016787	F:zinc ion binding; P:collagen and cuticulin-based cuticle development; P:multicellular organism development; P:body morphogenesis; F:peptidase activity; C:extracellular region; F:metalloendopeptidase activity; F:metallopeptidase activity; F:metal ion binding; P:proteolysis; P:ecdysis, collagen and cuticulin-based cuticle; P:molting cycle, collagen and cuticulin-based cuticle; F:hydrolase activity
AgB01_g600_t03	elegans confirmed by transcript evidence	659	20	0	60.3	10	F:GO:0015269; P:GO:0006813; F:GO:0005516; P:GO:0071805; P:GO:0030163; C:GO:0016020; C:GO:0016021; F:GO:0016286; C:GO:0043025; C:GO:0005886	F:calcium-activated potassium channel activity; P:potassium ion transport; F:calmodulin binding; P:potassium ion transmembrane transport; P:protein catabolic process; C:membrane; C:integral component of membrane; F:small conductance calcium-activated potassium channel activity; C:neuronal cell body; C:plasma membrane
AgB01_g601_t01	calcium activated nucleotidase 1	381	20	0	68.1	30	P:GO:0060465; F:GO:0004382; P:GO:0008340; P:GO:0043123; C:GO:0005794; P:GO:0046712; C:GO:0005789; P:GO:0009408; C:GO:0070062; P:GO:0030968; F:GO:0045134; F:GO:0005509; P:GO:0030166; P:GO:0009191; F:GO:0042803; P:GO:0007165; C:GO:0032580; P:GO:0006256; C:GO:0005783; P:GO:0040009; F:GO:0004871; P:GO:0000003; P:GO:0007369; F:GO:0043262; F:GO:0046872; C:GO:0016020; C:GO:0016021; F:GO:0017110; F:GO:00…	P:pharynx development; F:guanosine-diphosphatase activity; P:determination of adult lifespan; P:positive regulation of I-kappaB kinase/NF-kappaB signaling; C:Golgi apparatus; P:GDP catabolic process; C:endoplasmic reticulum membrane; P:response to heat; C:extracellular exosome; P:endoplasmic reticulum unfolded protein response; F:uridine-diphosphatase activity; F:calcium ion binding; P:proteoglyc…
AgB01_g602_t05	high-affinity copper uptake	287	20	9.49684e-62	54.55	7	P:GO:0010171; C:GO:0016020; C:GO:0016021; F:GO:0005375; P:GO:0035434; P:GO:0040018; P:GO:0000003	P:body morphogenesis; C:membrane; C:integral component of membrane; F:copper ion transmembrane transporter activity; P:copper ion transmembrane transport; P:positive regulation of multicellular organism growth; P:reproduction
AgB01_g603_t01	Fatty acid-binding	181	20	1.30532e-68	65.6	6	P:GO:0006914; P:GO:0008340; F:GO:0008289; C:GO:0005576; P:GO:0006810; F:GO:0005215	P:autophagy; P:determination of adult lifespan; F:lipid binding; C:extracellular region; P:transport; F:transporter activity
AgB01_g604_t01	---NA---	90
AgB01_g605_t11	Fatty acid-binding	112	20	1.37194e-78	76.2	6	P:GO:0006914; P:GO:0008340; F:GO:0008289; C:GO:0005576; P:GO:0006810; F:GO:0005215	P:autophagy; P:determination of adult lifespan; F:lipid binding; C:extracellular region; P:transport; F:transporter activity
AgB01_g606_t01	---NA---	33
AgB01_g607_t03	Fatty acid-binding 3	157	20	6.04145e-110	73.35	6	P:GO:0006914; P:GO:0008340; F:GO:0008289; C:GO:0005576; P:GO:0006810; F:GO:0005215	P:autophagy; P:determination of adult lifespan; F:lipid binding; C:extracellular region; P:transport; F:transporter activity
AgB01_g608_t02	Serine threonine- phosphatase 4 regulatory subunit 2-B	234	20	1.07187e-146	71.35	7	P:GO:0035188; P:GO:0050790; C:GO:0016020; C:GO:0016021; C:GO:0030289; P:GO:0000003; F:GO:0019888	P:hatching; P:regulation of catalytic activity; C:membrane; C:integral component of membrane; C:protein phosphatase 4 complex; P:reproduction; F:protein phosphatase regulator activity
AgB01_g609_t01	Serine threonine- phosphatase 4 regulatory subunit 2-A	116	4	6.74431e-27	83.5	2	P:GO:0050790; C:GO:0030289	P:regulation of catalytic activity; C:protein phosphatase 4 complex
AgB01_g610_t03	---NA---	116
AgB01_g611_t04	ran-binding 7	273	20	3.72018e-131	47.4	39	P:GO:0008283; P:GO:0007173; C:GO:0015030; P:GO:0007476; F:GO:0008565; P:GO:0045465; P:GO:0007474; P:GO:0008586; P:GO:0042675; P:GO:0006886; P:GO:0043524; C:GO:0005654; C:GO:0005829; F:GO:0030620; F:GO:0030621; P:GO:0035311; P:GO:0016318; P:GO:0007165; P:GO:0007169; F:GO:0008536; P:GO:0048749; C:GO:0005622; P:GO:0000189; C:GO:0005635; C:GO:0005634; C:GO:0048471; F:GO:0005515; P:GO:0006608; F:GO:00…	P:cell proliferation; P:epidermal growth factor receptor signaling pathway; C:Cajal body; P:imaginal disc-derived wing morphogenesis; F:protein transporter activity; P:R8 cell differentiation; P:imaginal disc-derived wing vein specification; P:imaginal disc-derived wing vein morphogenesis; P:compound eye cone cell differentiation; P:intracellular protein transport; P:negative regulation of neuron…
AgB01_g612_t10	hypothetical protein LOAG_04793	163	1	5.95269e-07	43
AgB01_g613_t01	---NA---	114
AgB01_g614_t01	3-hydroxyacyl- dehydratase 3	153	20	5.08464e-74	62.5	21	F:GO:0018812; F:GO:0016829; P:GO:0007254; P:GO:0042761; C:GO:0005783; P:GO:0007266; P:GO:0007249; P:GO:0006633; P:GO:0046726; P:GO:0006631; C:GO:0005789; C:GO:0031965; C:GO:0005925; C:GO:0005737; C:GO:0005739; C:GO:0016020; P:GO:0006629; C:GO:0016021; P:GO:0030497; P:GO:0045070; F:GO:0019899	F:3-hydroxyacyl-CoA dehydratase activity; F:lyase activity; P:JNK cascade; P:very long-chain fatty acid biosynthetic process; C:endoplasmic reticulum; P:Rho protein signal transduction; P:I-kappaB kinase/NF-kappaB signaling; P:fatty acid biosynthetic process; P:positive regulation by virus of viral protein levels in host cell; P:fatty acid metabolic process; C:endoplasmic reticulum membrane; C:nu…
AgB01_g615_t02	---NA---	102
AgB01_g616_t02	zinc finger-related and helicase and IBR domain-containing	2311	20	0	68.05	14	F:GO:0008270; C:GO:0005681; F:GO:0008026; F:GO:0004386; P:GO:0000398; F:GO:0003723; F:GO:0004004; F:GO:0000166; F:GO:0003676; F:GO:0005524; C:GO:0009507; C:GO:0005737; F:GO:0046872; F:GO:0016787	F:zinc ion binding; C:spliceosomal complex; F:ATP-dependent helicase activity; F:helicase activity; P:mRNA splicing, via spliceosome; F:RNA binding; F:ATP-dependent RNA helicase activity; F:nucleotide binding; F:nucleic acid binding; F:ATP binding; C:chloroplast; C:cytoplasm; F:metal ion binding; F:hydrolase activity
AgB01_g617_t01	pre-mRNA splicing factor ATP-dependent RNA helicase prp16	639	20	0	53.5	18	F:GO:0008270; F:GO:0008186; F:GO:0008026; P:GO:0006396; F:GO:0004386; C:GO:0005684; F:GO:0003723; F:GO:0004004; F:GO:0000166; F:GO:0003676; C:GO:0005634; F:GO:0005524; P:GO:0000350; C:GO:0005737; F:GO:0046872; C:GO:0005739; C:GO:0071007; F:GO:0016787	F:zinc ion binding; F:RNA-dependent ATPase activity; F:ATP-dependent helicase activity; P:RNA processing; F:helicase activity; C:U2-type spliceosomal complex; F:RNA binding; F:ATP-dependent RNA helicase activity; F:nucleotide binding; F:nucleic acid binding; C:nucleus; F:ATP binding; P:generation of catalytic spliceosome for second transesterification step; C:cytoplasm; F:metal ion binding; C:mit…
AgB01_g618_t03	zinc finger-related and helicase and IBR domain-containing	676	20	0	56.9	10	F:GO:0000166; F:GO:0003676; F:GO:0005524; C:GO:0005634; F:GO:0008270; C:GO:0009507; F:GO:0046872; F:GO:0008026; F:GO:0004386; F:GO:0016787	F:nucleotide binding; F:nucleic acid binding; F:ATP binding; C:nucleus; F:zinc ion binding; C:chloroplast; F:metal ion binding; F:ATP-dependent helicase activity; F:helicase activity; F:hydrolase activity
AgB01_g619_t02	Proteasome ( macropain) 26S non- 1	494	20	0	62.6	43	C:GO:0008540; P:GO:0009792; P:GO:0008340; P:GO:0042176; P:GO:0038095; C:GO:0022624; P:GO:0043488; P:GO:0006521; C:GO:0005654; P:GO:0002223; P:GO:0000165; P:GO:0002479; C:GO:0070062; C:GO:0072686; P:GO:0002119; P:GO:0050790; P:GO:0006915; C:GO:0005829; P:GO:0060071; P:GO:0050852; F:GO:0005080; P:GO:0000209; F:GO:0004175; P:GO:0090263; P:GO:0038061; C:GO:0000502; C:GO:0005886; P:GO:0000003; P:GO:00…	C:proteasome regulatory particle, base subcomplex; P:embryo development ending in birth or egg hatching; P:determination of adult lifespan; P:regulation of protein catabolic process; P:Fc-epsilon receptor signaling pathway; C:proteasome accessory complex; P:regulation of mRNA stability; P:regulation of cellular amino acid metabolic process; C:nucleoplasm; P:stimulatory C-type lectin receptor sign…
AgB01_g620_t01	26S proteasome non-ATPase regulatory subunit 1	510	20	0	58.65	14	C:GO:0008540; P:GO:0042176; F:GO:0004175; C:GO:0022624; C:GO:0000502; C:GO:0005634; P:GO:0043161; F:GO:0005515; C:GO:0070062; C:GO:0016020; P:GO:0050790; C:GO:0016021; F:GO:0030234; C:GO:0034515	C:proteasome regulatory particle, base subcomplex; P:regulation of protein catabolic process; F:endopeptidase activity; C:proteasome accessory complex; C:proteasome complex; C:nucleus; P:proteasome-mediated ubiquitin-dependent protein catabolic process; F:protein binding; C:extracellular exosome; C:membrane; P:regulation of catalytic activity; C:integral component of membrane; F:enzyme regulator …
AgB01_g621_t06	Core-2 I-Branching enzyme family	163	3	7.15583e-12	58.67	4	F:GO:0016757; F:GO:0008375; C:GO:0016020; F:GO:0016740	F:transferase activity, transferring glycosyl groups; F:acetylglucosaminyltransferase activity; C:membrane; F:transferase activity
AgB01_g622_t03	Cell death 3	471	20	0	62.6	30	P:GO:0008340; P:GO:0009792; F:GO:0004363; P:GO:0097194; F:GO:0097153; F:GO:0005524; F:GO:0097200; P:GO:0008219; P:GO:0006915; F:GO:0016874; F:GO:0042802; P:GO:0030163; F:GO:0004197; F:GO:0004175; P:GO:0006750; F:GO:0008234; P:GO:0042981; F:GO:0008233; P:GO:1902742; P:GO:0043652; P:GO:0000003; C:GO:0048471; F:GO:0005515; C:GO:0005737; C:GO:0016020; P:GO:0006508; P:GO:0016540; P:GO:0030155; P:GO:00…	P:determination of adult lifespan; P:embryo development ending in birth or egg hatching; F:glutathione synthase activity; P:execution phase of apoptosis; F:cysteine-type endopeptidase activity involved in apoptotic process; F:ATP binding; F:cysteine-type endopeptidase activity involved in execution phase of apoptosis; P:cell death; P:apoptotic process; F:ligase activity; F:identical protein bindi…
AgB01_g623_t12	hypothetical protein LOAG_08690	757	1	1.18847e-09	50
AgB01_g624_t01	---NA---	107
AgB01_g625_t05	---NA---	91
AgB01_g626_t02	---NA---	151
AgB01_g627_t01	Spermine spermidine synthase family	89	20	2.10798e-18	58.55	7	P:GO:0008152; C:GO:0016020; C:GO:0016021; F:GO:0008168; F:GO:0016740; C:GO:0005575; P:GO:0032259	P:metabolic process; C:membrane; C:integral component of membrane; F:methyltransferase activity; F:transferase activity; C:cellular_component; P:methylation
AgB01_g628_t01	---NA---	298
AgB01_g629_t03	hypothetical protein Bm1_32530	121	2	8.43432e-19	52
AgB01_g630_t01	---NA---	163
AgB01_g631_t01	---NA---	99
AgB01_g632_t01	Diamine acetyltransferase 2	166	20	1.6645e-122	64.4	16	F:GO:0016746; F:GO:0042802; F:GO:0019809; P:GO:0046204; P:GO:0032919; P:GO:0046208; F:GO:0004145; P:GO:0008216; P:GO:0008215; P:GO:0009447; C:GO:0070062; C:GO:0005737; P:GO:0032918; F:GO:0016740; P:GO:0032920; F:GO:0008080	F:transferase activity, transferring acyl groups; F:identical protein binding; F:spermidine binding; P:nor-spermidine metabolic process; P:spermine acetylation; P:spermine catabolic process; F:diamine N-acetyltransferase activity; P:spermidine metabolic process; P:spermine metabolic process; P:putrescine catabolic process; C:extracellular exosome; C:cytoplasm; P:spermidine acetylation; F:transfer…
AgB01_g633_t02	transmembrane and TPR repeat-containing 4	740	20	0	55.35	7	P:GO:0008150; F:GO:0009055; C:GO:0016020; C:GO:0016021; C:GO:0005575; F:GO:0003674; F:GO:0020037	P:biological_process; F:electron carrier activity; C:membrane; C:integral component of membrane; C:cellular_component; F:molecular_function; F:heme binding
AgB01_g634_t01	---NA---	700
AgB01_g635_t02	Salivary glue Sgs-3 precursor	607	7	4.38591e-93	74	1	P:GO:0009792	P:embryo development ending in birth or egg hatching
AgB01_g636_t01	---NA---	102
AgB01_g637_t01	elegans ly confirmed by transcript evidence	243	20	5.35617e-84	49.6	1	C:GO:0005737	C:cytoplasm
AgB01_g638_t01	---NA---	70
AgB01_g639_t01	---NA---	264
AgB01_g640_t01	---NA---	166
AgB01_g641_t01	---NA---	164
AgB01_g642_t04	phosphatase 1	408	20	0	60.4	67	P:GO:0007094; P:GO:0016569; P:GO:0009792; C:GO:0000778; P:GO:0007059; P:GO:0006364; P:GO:0051321; C:GO:0035838; C:GO:1990567; C:GO:0035839; P:GO:0045132; P:GO:0034501; C:GO:0005829; P:GO:0018991; P:GO:0051726; P:GO:0018996; P:GO:0016576; P:GO:0000903; P:GO:0007067; P:GO:0007346; C:GO:0030139; C:GO:0005634; P:GO:0000077; P:GO:0000076; F:GO:0005515; C:GO:0000790; F:GO:0046872; P:GO:0035307; C:GO:00…	P:mitotic spindle assembly checkpoint; P:covalent chromatin modification; P:embryo development ending in birth or egg hatching; C:condensed nuclear chromosome kinetochore; P:chromosome segregation; P:rRNA processing; P:meiotic cell cycle; C:growing cell tip; C:DPS complex; C:non-growing cell tip; P:meiotic chromosome segregation; P:protein localization to kinetochore; C:cytosol; P:oviposition; P:…
AgB01_g643_t02	Glycerol kinase 5	452	20	0	65.55	11	F:GO:0000166; P:GO:0006071; P:GO:0005975; F:GO:0005524; C:GO:0005737; F:GO:0004370; P:GO:0019563; P:GO:0016310; F:GO:0016773; F:GO:0016740; F:GO:0016301	F:nucleotide binding; P:glycerol metabolic process; P:carbohydrate metabolic process; F:ATP binding; C:cytoplasm; F:glycerol kinase activity; P:glycerol catabolic process; P:phosphorylation; F:phosphotransferase activity, alcohol group as acceptor; F:transferase activity; F:kinase activity
AgB01_g644_t03	(Hsp40) subfamily member 3	503	20	0	70.4	22	F:GO:0019901; C:GO:1903561; P:GO:0036494; C:GO:0005783; F:GO:0004860; C:GO:0005575; P:GO:0006469; P:GO:1903912; C:GO:0005788; C:GO:0070062; C:GO:0005737; P:GO:0030968; P:GO:0043066; F:GO:0051087; C:GO:0016020; C:GO:0016021; C:GO:0005829; P:GO:1904030; C:GO:0031205; P:GO:0070417; P:GO:0051603; F:GO:0051787	F:protein kinase binding; C:extracellular vesicle; P:positive regulation of translation initiation in response to endoplasmic reticulum stress; C:endoplasmic reticulum; F:protein kinase inhibitor activity; C:cellular_component; P:negative regulation of protein kinase activity; P:negative regulation of endoplasmic reticulum stress-induced eIF2 alpha phosphorylation; C:endoplasmic reticulum lumen; …
AgB01_g645_t01	large subunit ribosomal 35	123	20	6.30864e-68	80.55	4	F:GO:0003735; C:GO:0005840; C:GO:0005622; P:GO:0006412	F:structural constituent of ribosome; C:ribosome; C:intracellular; P:translation
AgB01_g646_t05	---NA---	205
AgB01_g647_t02	---NA---	123
AgB01_g648_t01	heparan 6-O sulfotransferase HST-6	472	20	0	73.35	17	P:GO:0015015; F:GO:0008270; P:GO:0015012; P:GO:0007411; F:GO:0008146; P:GO:0048666; P:GO:0040018; F:GO:0003676; P:GO:0048286; F:GO:0003723; F:GO:0017095; P:GO:0060716; P:GO:0001525; F:GO:0046872; C:GO:0016020; C:GO:0016021; F:GO:0016740	P:heparan sulfate proteoglycan biosynthetic process, enzymatic modification; F:zinc ion binding; P:heparan sulfate proteoglycan biosynthetic process; P:axon guidance; F:sulfotransferase activity; P:neuron development; P:positive regulation of multicellular organism growth; F:nucleic acid binding; P:lung alveolus development; F:RNA binding; F:heparan sulfate 6-O-sulfotransferase activity; P:labyri…
AgB01_g649_t01	transcription factor	323	20	1.99327e-119	49.75	15	P:GO:0006351; P:GO:0007275; P:GO:0007399; P:GO:0006355; F:GO:0046983; P:GO:0045944; F:GO:0000981; P:GO:0006357; F:GO:0003677; C:GO:0005634; C:GO:0005667; F:GO:0003700; C:GO:0005737; P:GO:0030154; P:GO:0032502	P:transcription, DNA-templated; P:multicellular organism development; P:nervous system development; P:regulation of transcription, DNA-templated; F:protein dimerization activity; P:positive regulation of transcription from RNA polymerase II promoter; F:RNA polymerase II transcription factor activity, sequence-specific DNA binding; P:regulation of transcription from RNA polymerase II promoter; F:D…
AgB01_g650_t03	---NA---	217
AgB01_g651_t01	Cuticle collagen 12	202	20	4.84723e-79	75.45	6	P:GO:0040011; C:GO:0005581; P:GO:0010171; C:GO:0016020; C:GO:0016021; F:GO:0042302	P:locomotion; C:collagen trimer; P:body morphogenesis; C:membrane; C:integral component of membrane; F:structural constituent of cuticle
AgB01_g652_t01	Homeobox domain containing	207	3	1.17797e-96	73.67	4	F:GO:0003677; C:GO:0005634; P:GO:0006355; F:GO:0043565	F:DNA binding; C:nucleus; P:regulation of transcription, DNA-templated; F:sequence-specific DNA binding
AgB01_g653_t01	ALR-1	86	20	6.44979e-42	82.95	5	F:GO:0003677; C:GO:0005634; F:GO:0000977; P:GO:0006355; F:GO:0043565	F:DNA binding; C:nucleus; F:RNA polymerase II regulatory region sequence-specific DNA binding; P:regulation of transcription, DNA-templated; F:sequence-specific DNA binding
AgB01_g654_t01	---NA---	62
AgB01_g655_t01	---NA---	104
AgB01_g656_t03	---NA---	87
AgB01_g657_t02	AP-3 complex subunit beta-2	107	20	7.61295e-44	63.7	22	F:GO:0019903; C:GO:1904115; P:GO:0008089; P:GO:0015031; F:GO:0008565; P:GO:0048007; P:GO:0007596; P:GO:0006886; P:GO:0006622; P:GO:0006810; C:GO:0005765; C:GO:0030117; P:GO:0032438; C:GO:0030119; P:GO:0016192; C:GO:0016020; P:GO:0019882; C:GO:0030131; C:GO:0030123; P:GO:0051138; P:GO:0048490; F:GO:0030742	F:protein phosphatase binding; C:axon cytoplasm; P:anterograde axonal transport; P:protein transport; F:protein transporter activity; P:antigen processing and presentation, exogenous lipid antigen via MHC class Ib; P:blood coagulation; P:intracellular protein transport; P:protein targeting to lysosome; P:transport; C:lysosomal membrane; C:membrane coat; P:melanosome organization; C:AP-type membra…
AgB01_g658_t03	leucine Rich Repeat family	247	20	0	64.65	8	C:GO:0005737; P:GO:0007409; C:GO:0016020; C:GO:0016021; C:GO:0005783; P:GO:0051965; C:GO:0005886; C:GO:0009986	C:cytoplasm; P:axonogenesis; C:membrane; C:integral component of membrane; C:endoplasmic reticulum; P:positive regulation of synapse assembly; C:plasma membrane; C:cell surface
AgB01_g659_t01	---NA---	123
AgB01_g660_t02	Peptidase inhibitor 16	408	20	0	56.45	18	P:GO:0061052; P:GO:0007186; P:GO:0007165; P:GO:0007166; C:GO:0005576; F:GO:0004871; F:GO:0003674; F:GO:0030414; C:GO:0005887; F:GO:0004930; C:GO:0005615; P:GO:0007339; C:GO:0070062; C:GO:0097224; C:GO:0001669; C:GO:0016020; C:GO:0016021; P:GO:0010466	P:negative regulation of cell growth involved in cardiac muscle cell development; P:G-protein coupled receptor signaling pathway; P:signal transduction; P:cell surface receptor signaling pathway; C:extracellular region; F:signal transducer activity; F:molecular_function; F:peptidase inhibitor activity; C:integral component of plasma membrane; F:G-protein coupled receptor activity; C:extracellular…
AgB01_g661_t01	u3 small nucleolar RNA-associated 18 homolog	371	20	0	50.6	10	C:GO:0032040; P:GO:0000462; C:GO:0005634; P:GO:0002119; P:GO:0009792; C:GO:0034388; P:GO:0006364; C:GO:0005730; P:GO:0006898; F:GO:0003723	C:small-subunit processome; P:maturation of SSU-rRNA from tricistronic rRNA transcript (SSU-rRNA, 5.8S rRNA, LSU-rRNA); C:nucleus; P:nematode larval development; P:embryo development ending in birth or egg hatching; C:Pwp2p-containing subcomplex of 90S preribosome; P:rRNA processing; C:nucleolus; P:receptor-mediated endocytosis; F:RNA binding
AgB01_g662_t01	phosphatidylinositol transfer	282	20	0	73.1	2	P:GO:0006810; C:GO:0005622	P:transport; C:intracellular
AgB01_g663_t01	hypothetical protein LOAG_08627	283	1	4.17768e-16	49
AgB01_g664_t01	---NA---	631
AgB01_g665_t01	---NA---	220
AgB01_g666_t01	---NA---	112
AgB01_g667_t01	lysophospholipase family	588	20	0	67.75	10	P:GO:0008150; C:GO:0070062; C:GO:0016020; P:GO:0006629; P:GO:0016042; C:GO:0016021; C:GO:0005576; F:GO:0003674; C:GO:0005764; F:GO:0016787	P:biological_process; C:extracellular exosome; C:membrane; P:lipid metabolic process; P:lipid catabolic process; C:integral component of membrane; C:extracellular region; F:molecular_function; C:lysosome; F:hydrolase activity
AgB01_g668_t01	---NA---	53
AgB01_g669_t01	---NA---	181
AgB01_g670_t01	---NA---	142
AgB01_g671_t07	---NA---	104
AgB01_g672_t01	ATP-binding sub-family D (ALD) member 4	242	20	7.63041e-92	67.05	14	F:GO:0016887; F:GO:0042626; P:GO:0055085; P:GO:0009235; P:GO:0006810; C:GO:0005765; C:GO:0005789; F:GO:0000166; C:GO:0005778; F:GO:0005524; C:GO:0005777; C:GO:0016020; C:GO:0016021; C:GO:0043190	F:ATPase activity; F:ATPase activity, coupled to transmembrane movement of substances; P:transmembrane transport; P:cobalamin metabolic process; P:transport; C:lysosomal membrane; C:endoplasmic reticulum membrane; F:nucleotide binding; C:peroxisomal membrane; F:ATP binding; C:peroxisome; C:membrane; C:integral component of membrane; C:ATP-binding cassette (ABC) transporter complex
AgB01_g673_t01	ATP-binding cassette sub-family D member 4	315	20	3.75529e-163	67.5	11	C:GO:0005789; F:GO:0000166; F:GO:0016887; F:GO:0005524; C:GO:0005777; F:GO:0042626; P:GO:0055085; C:GO:0016020; C:GO:0016021; P:GO:0009235; P:GO:0006810	C:endoplasmic reticulum membrane; F:nucleotide binding; F:ATPase activity; F:ATP binding; C:peroxisome; F:ATPase activity, coupled to transmembrane movement of substances; P:transmembrane transport; C:membrane; C:integral component of membrane; P:cobalamin metabolic process; P:transport
AgB01_g674_t01	ATP-binding cassette sub-family D member 4	644	20	0	57.7	11	F:GO:0000166; C:GO:0005789; F:GO:0016887; F:GO:0005524; C:GO:0005777; F:GO:0042626; P:GO:0055085; C:GO:0016020; C:GO:0016021; P:GO:0009235; P:GO:0006810	F:nucleotide binding; C:endoplasmic reticulum membrane; F:ATPase activity; F:ATP binding; C:peroxisome; F:ATPase activity, coupled to transmembrane movement of substances; P:transmembrane transport; C:membrane; C:integral component of membrane; P:cobalamin metabolic process; P:transport
AgB01_g675_t03	---NA---	490
AgB01_g676_t01	WD repeat domain 18	481	20	0	53.05	23	P:GO:0030091; P:GO:0007281; P:GO:0007275; P:GO:0040020; P:GO:0042254; P:GO:0007276; F:GO:0008113; P:GO:0006364; P:GO:0006898; P:GO:0007368; P:GO:0042127; P:GO:0000003; C:GO:0005654; P:GO:0007506; P:GO:0006979; C:GO:0005634; P:GO:0008406; C:GO:0005737; P:GO:0002119; P:GO:0070121; P:GO:0030154; F:GO:0016671; P:GO:0055114	P:protein repair; P:germ cell development; P:multicellular organism development; P:regulation of meiotic nuclear division; P:ribosome biogenesis; P:gamete generation; F:peptide-methionine (S)-S-oxide reductase activity; P:rRNA processing; P:receptor-mediated endocytosis; P:determination of left/right symmetry; P:regulation of cell proliferation; P:reproduction; C:nucleoplasm; P:gonadal mesoderm d…
AgB01_g677_t02	Methylmalonic aciduria and homocystinuria type D	255	20	0	62.55	5	C:GO:0005737; C:GO:0005739; P:GO:0009235; P:GO:0006974; P:GO:0009108	C:cytoplasm; C:mitochondrion; P:cobalamin metabolic process; P:cellular response to DNA damage stimulus; P:coenzyme biosynthetic process
AgB01_g678_t01	---NA---	116
AgB01_g679_t01	hypothetical protein LOAG_09110	425	2	2.87376e-19	45
AgB01_g680_t01	---NA---	116
AgB01_g681_t01	---NA---	114
AgB01_g682_t01	tRNA pseudouridine synthase 2	353	20	0	58.35	12	F:GO:0000166; C:GO:0016459; F:GO:0005524; P:GO:0001522; C:GO:0005856; F:GO:0003723; F:GO:0003779; P:GO:0009451; P:GO:0006396; F:GO:0009982; F:GO:0016853; F:GO:0003774	F:nucleotide binding; C:myosin complex; F:ATP binding; P:pseudouridine synthesis; C:cytoskeleton; F:RNA binding; F:actin binding; P:RNA modification; P:RNA processing; F:pseudouridine synthase activity; F:isomerase activity; F:motor activity
AgB01_g683_t02	---NA---	126
AgB01_g684_t01	---NA---	92
AgB01_g685_t04	40S ribosomal S4	263	20	2.3686e-169	78.8	10	P:GO:0043009; F:GO:0003723; F:GO:0003735; C:GO:0030529; C:GO:0022627; P:GO:0007420; F:GO:0019843; C:GO:0005840; C:GO:0005622; P:GO:0006412	P:chordate embryonic development; F:RNA binding; F:structural constituent of ribosome; C:intracellular ribonucleoprotein complex; C:cytosolic small ribosomal subunit; P:brain development; F:rRNA binding; C:ribosome; C:intracellular; P:translation
AgB01_g686_t01	---NA---	346
AgB01_g687_t01	elegans ly confirmed by transcript evidence	291	20	1.3041e-08	51.65	7	P:GO:0007606; F:GO:0004930; F:GO:0004888; P:GO:0007186; P:GO:0007165; C:GO:0016020; C:GO:0016021	P:sensory perception of chemical stimulus; F:G-protein coupled receptor activity; F:transmembrane signaling receptor activity; P:G-protein coupled receptor signaling pathway; P:signal transduction; C:membrane; C:integral component of membrane
AgB01_g688_t03	---NA---	264
AgB01_g689_t01	---NA---	89
AgB01_g690_t01	transcription factor SOX-	355	20	3.91125e-169	71.1	2	P:GO:0006355; F:GO:0043565	P:regulation of transcription, DNA-templated; F:sequence-specific DNA binding
AgB01_g691_t03	Cleavage and polyadenylation specificity factor subunit 2	841	20	0	78.85	14	P:GO:0040027; P:GO:0040035; P:GO:0009792; P:GO:0006398; P:GO:0006397; P:GO:0006378; F:GO:0003674; P:GO:0000003; P:GO:0006379; C:GO:0005634; F:GO:0003723; C:GO:0005847; C:GO:0016020; P:GO:0031124	P:negative regulation of vulval development; P:hermaphrodite genitalia development; P:embryo development ending in birth or egg hatching; P:mRNA 3'-end processing by stem-loop binding and cleavage; P:mRNA processing; P:mRNA polyadenylation; F:molecular_function; P:reproduction; P:mRNA cleavage; C:nucleus; F:RNA binding; C:mRNA cleavage and polyadenylation specificity factor complex; C:membrane; P…
AgB01_g692_t01	hypothetical protein Bm1_33500	315	20	3.3193e-45	50.6
AgB01_g693_t01	---NA---	104
AgB01_g694_t01	---NA---	72
AgB01_g695_t01	---NA---	95
AgB01_g696_t01	Hypothetical protein CBG13084	192	10	1.46068e-08	50.9	7	P:GO:0007606; F:GO:0004930; F:GO:0004888; P:GO:0007186; P:GO:0007165; C:GO:0016020; C:GO:0016021	P:sensory perception of chemical stimulus; F:G-protein coupled receptor activity; F:transmembrane signaling receptor activity; P:G-protein coupled receptor signaling pathway; P:signal transduction; C:membrane; C:integral component of membrane
AgB01_g697_t01	---NA---	208
AgB01_g698_t03	ribosomal S16	145	20	1.28664e-101	91.5	15	C:GO:0022626; C:GO:0022627; P:GO:0002181; P:GO:0009792; C:GO:0005840; P:GO:0000003; P:GO:0006412; P:GO:0000462; F:GO:0003735; C:GO:0030529; P:GO:0002119; C:GO:0016020; P:GO:0006915; C:GO:0016021; P:GO:0018996	C:cytosolic ribosome; C:cytosolic small ribosomal subunit; P:cytoplasmic translation; P:embryo development ending in birth or egg hatching; C:ribosome; P:reproduction; P:translation; P:maturation of SSU-rRNA from tricistronic rRNA transcript (SSU-rRNA, 5.8S rRNA, LSU-rRNA); F:structural constituent of ribosome; C:intracellular ribonucleoprotein complex; P:nematode larval development; C:membrane; …
AgB01_g699_t04	F-box domain containing	457	7	5.02361e-89	50.29
AgB01_g700_t04	F-box domain containing	442	7	6.65633e-88	52.86
AgB01_g701_t02	epidermal growth factor receptor kinase substrate 8 3	548	20	3.66524e-13	58.6	14	C:GO:0016459; P:GO:0008150; F:GO:0042802; P:GO:0007015; P:GO:0006897; C:GO:0005575; F:GO:0003674; F:GO:0003774; F:GO:0000166; F:GO:0005524; F:GO:0043130; C:GO:0005737; F:GO:0008092; F:GO:0030674	C:myosin complex; P:biological_process; F:identical protein binding; P:actin filament organization; P:endocytosis; C:cellular_component; F:molecular_function; F:motor activity; F:nucleotide binding; F:ATP binding; F:ubiquitin binding; C:cytoplasm; F:cytoskeletal protein binding; F:protein binding, bridging
AgB01_g702_t01	---NA---	141
AgB01_g703_t06	---NA---	111
AgB01_g704_t01	---NA---	110
AgB01_g705_t01	227 kDa spindle- and centromere-associated	74	20	1.06191e-20	74.7	3	C:GO:0005634; P:GO:0009792; C:GO:0005828	C:nucleus; P:embryo development ending in birth or egg hatching; C:kinetochore microtubule
AgB01_g706_t01	---NA---	336
AgB01_g707_t01	---NA---	130
AgB01_g708_t06	Condensin-2 complex subunit D3	1181	20	0	52.9	28	P:GO:0040035; P:GO:0007076; F:GO:0035064; P:GO:0009792; C:GO:0000779; C:GO:0000777; C:GO:0000799; C:GO:0000796; C:GO:0005654; P:GO:0051301; P:GO:0002119; C:GO:0031618; P:GO:0051307; P:GO:0051304; P:GO:0010032; P:GO:0030261; P:GO:0007067; C:GO:0042585; F:GO:0003682; P:GO:0007049; P:GO:0000003; C:GO:0000793; C:GO:0005634; P:GO:0008406; F:GO:0042393; C:GO:0016020; P:GO:0000070; P:GO:0051315	P:hermaphrodite genitalia development; P:mitotic chromosome condensation; F:methylated histone binding; P:embryo development ending in birth or egg hatching; C:condensed chromosome, centromeric region; C:condensed chromosome kinetochore; C:nuclear condensin complex; C:condensin complex; C:nucleoplasm; P:cell division; P:nematode larval development; C:nuclear pericentric heterochromatin; P:meiotic…
AgB01_g709_t02	Mitochondrial-processing peptidase subunit alpha	546	20	0	69.15	14	F:GO:0008270; F:GO:0004175; F:GO:0008233; F:GO:0004222; C:GO:0005743; F:GO:0008237; P:GO:0006627; C:GO:0005615; F:GO:0046872; F:GO:0003824; C:GO:0005739; P:GO:0006508; C:GO:0016020; F:GO:0016787	F:zinc ion binding; F:endopeptidase activity; F:peptidase activity; F:metalloendopeptidase activity; C:mitochondrial inner membrane; F:metallopeptidase activity; P:protein processing involved in protein targeting to mitochondrion; C:extracellular space; F:metal ion binding; F:catalytic activity; C:mitochondrion; P:proteolysis; C:membrane; F:hydrolase activity
AgB01_g710_t02	Glutaredoxin family	249	20	5.47567e-135	67.9	15	F:GO:0015035; F:GO:0009055; P:GO:0045454; C:GO:0005783; C:GO:0005794; F:GO:0008794; P:GO:0006886; C:GO:0005773; C:GO:0005623; C:GO:0005737; F:GO:0016491; C:GO:0016020; C:GO:0016021; C:GO:0030176; P:GO:0055114	F:protein disulfide oxidoreductase activity; F:electron carrier activity; P:cell redox homeostasis; C:endoplasmic reticulum; C:Golgi apparatus; F:arsenate reductase (glutaredoxin) activity; P:intracellular protein transport; C:vacuole; C:cell; C:cytoplasm; F:oxidoreductase activity; C:membrane; C:integral component of membrane; C:integral component of endoplasmic reticulum membrane; P:oxidation-r…
AgB01_g711_t01	mitochondrial GTPase 1 precursor	366	20	0	64.6	12	F:GO:0005525; F:GO:0000166; P:GO:0006417; P:GO:0044065; C:GO:0005759; F:GO:0003924; C:GO:0005739; C:GO:0016020; P:GO:0042254; C:GO:0005761; C:GO:0005743; P:GO:0070129	F:GTP binding; F:nucleotide binding; P:regulation of translation; P:regulation of respiratory system process; C:mitochondrial matrix; F:GTPase activity; C:mitochondrion; C:membrane; P:ribosome biogenesis; C:mitochondrial ribosome; C:mitochondrial inner membrane; P:regulation of mitochondrial translation
AgB01_g712_t04	elongator complex 4-like	349	20	8.42188e-88	49	17	P:GO:0043967; P:GO:0043966; P:GO:0045859; C:GO:0008023; P:GO:0006351; P:GO:0009792; P:GO:0006355; F:GO:0000993; P:GO:0000003; C:GO:0000123; P:GO:0006357; P:GO:0006368; F:GO:0008607; C:GO:0005634; F:GO:0004402; C:GO:0005737; C:GO:0033588	P:histone H4 acetylation; P:histone H3 acetylation; P:regulation of protein kinase activity; C:transcription elongation factor complex; P:transcription, DNA-templated; P:embryo development ending in birth or egg hatching; P:regulation of transcription, DNA-templated; F:RNA polymerase II core binding; P:reproduction; C:histone acetyltransferase complex; P:regulation of transcription from RNA polym…
AgB01_g713_t02	Zinc C2H2 type family	1120	20	4.52715e-110	64	2	F:GO:0003676; F:GO:0046872	F:nucleic acid binding; F:metal ion binding
AgB01_g714_t01	cyclin h	323	20	0	64.05	39	P:GO:0040035; P:GO:0006361; P:GO:0040011; P:GO:0006362; P:GO:0009792; P:GO:0006283; P:GO:0006366; P:GO:0006363; P:GO:0045944; C:GO:0005675; P:GO:0006468; P:GO:0006367; C:GO:0005654; P:GO:0006368; P:GO:0000086; P:GO:0002119; P:GO:0000082; C:GO:0070985; P:GO:0016310; F:GO:0008094; P:GO:0045737; F:GO:0016538; P:GO:0045859; F:GO:0008353; P:GO:0006351; P:GO:0006370; P:GO:0010171; P:GO:0006294; C:GO:00…	P:hermaphrodite genitalia development; P:transcription initiation from RNA polymerase I promoter; P:locomotion; P:transcription elongation from RNA polymerase I promoter; P:embryo development ending in birth or egg hatching; P:transcription-coupled nucleotide-excision repair; P:transcription from RNA polymerase II promoter; P:termination of RNA polymerase I transcription; P:positive regulation of…
AgB01_g715_t01	PREDICTED: similar to mucin 2, partial	148	3	1.29406e-07	50.67
AgB01_g716_t01	Adenosine 3 -phospho 5 -phosphosulfate transporter 1	106	20	1.43068e-58	72.35	24	P:GO:0055085; P:GO:0007165; P:GO:0009792; C:GO:0030173; P:GO:0043123; P:GO:0046963; F:GO:0046964; P:GO:0007411; C:GO:0005794; C:GO:0000139; C:GO:0005840; F:GO:0004871; P:GO:0006810; C:GO:0005622; P:GO:1902559; P:GO:0007413; P:GO:0006412; F:GO:0003735; C:GO:0030529; P:GO:0002119; C:GO:0016020; C:GO:0016021; C:GO:0030176; P:GO:0018996	P:transmembrane transport; P:signal transduction; P:embryo development ending in birth or egg hatching; C:integral component of Golgi membrane; P:positive regulation of I-kappaB kinase/NF-kappaB signaling; P:3'-phosphoadenosine 5'-phosphosulfate transport; F:3'-phosphoadenosine 5'-phosphosulfate transmembrane transporter activity; P:axon guidance; C:Golgi apparatus; C:Golgi membrane; C:ribosome; …
AgB01_g717_t02	Neuronal calcium sensor 1	208	20	2.2927e-151	83.35	16	C:GO:0014069; P:GO:0060872; C:GO:0005794; C:GO:0045202; F:GO:0005245; C:GO:0005886; C:GO:0048471; C:GO:0005737; F:GO:0046872; C:GO:0045211; P:GO:0048752; F:GO:0005509; C:GO:0016020; P:GO:0070588; C:GO:0030054; P:GO:0010975	C:postsynaptic density; P:semicircular canal development; C:Golgi apparatus; C:synapse; F:voltage-gated calcium channel activity; C:plasma membrane; C:perinuclear region of cytoplasm; C:cytoplasm; F:metal ion binding; C:postsynaptic membrane; P:semicircular canal morphogenesis; F:calcium ion binding; C:membrane; P:calcium ion transmembrane transport; C:cell junction; P:regulation of neuron projec…
AgB01_g718_t01	---NA---	111
AgB01_g719_t02	kinase domain containing	446	20	0	63.4	11	F:GO:0000166; P:GO:0008360; F:GO:0005524; C:GO:0005634; C:GO:0005737; F:GO:0004672; P:GO:0016310; F:GO:0004674; P:GO:0018105; P:GO:0006468; F:GO:0016301	F:nucleotide binding; P:regulation of cell shape; F:ATP binding; C:nucleus; C:cytoplasm; F:protein kinase activity; P:phosphorylation; F:protein serine/threonine kinase activity; P:peptidyl-serine phosphorylation; P:protein phosphorylation; F:kinase activity
AgB01_g720_t01	---NA---	117
AgB01_g721_t01	---NA---	57
AgB01_g722_t01	7 transmembrane receptor	301	12	2.27455e-78	57	3	P:GO:0055085; C:GO:0016020; C:GO:0016021	P:transmembrane transport; C:membrane; C:integral component of membrane
AgB01_g723_t03	thrombospondin type 1 domain	311	20	4.68684e-44	49.7	15	P:GO:0031290; P:GO:0040035; P:GO:0040011; P:GO:0009792; P:GO:0007411; F:GO:0004872; C:GO:0005886; P:GO:0000003; C:GO:0030426; P:GO:0072499; P:GO:0002119; C:GO:0016020; C:GO:0016021; P:GO:0019233; C:GO:0030424	P:retinal ganglion cell axon guidance; P:hermaphrodite genitalia development; P:locomotion; P:embryo development ending in birth or egg hatching; P:axon guidance; F:receptor activity; C:plasma membrane; P:reproduction; C:growth cone; P:photoreceptor cell axon guidance; P:nematode larval development; C:membrane; C:integral component of membrane; P:sensory perception of pain; C:axon
AgB01_g724_t01	---NA---	252
AgB01_g725_t01	elegans ly confirmed by transcript evidence	122	5	3.95115e-12	55.2
AgB01_g726_t01	---NA---	159
AgB01_g727_t01	---NA---	203
AgB01_g728_t04	Guanylate kinase family	922	20	0	63.25	71	C:GO:0042734; C:GO:0016327; C:GO:0014069; C:GO:0016328; P:GO:0007010; C:GO:0061174; P:GO:0009792; C:GO:0061176; F:GO:0005154; F:GO:0005198; P:GO:0008104; P:GO:0051294; P:GO:0042332; C:GO:0045202; F:GO:0004385; P:GO:0045887; P:GO:0008105; P:GO:0051124; P:GO:0002119; C:GO:0043195; C:GO:0045211; P:GO:0045175; C:GO:0031594; P:GO:0051726; P:GO:0016332; P:GO:0016333; P:GO:0016334; P:GO:0016335; P:GO:00…	C:presynaptic membrane; C:apicolateral plasma membrane; C:postsynaptic density; C:lateral plasma membrane; P:cytoskeleton organization; C:type I terminal bouton; P:embryo development ending in birth or egg hatching; C:type Ib terminal bouton; F:epidermal growth factor receptor binding; F:structural molecule activity; P:protein localization; P:establishment of spindle orientation; P:gravitaxis; C:…
AgB01_g729_t01	Integrator complex subunit 1	1766	20	0	51	14	P:GO:0034474; P:GO:0042795; F:GO:0003674; C:GO:0005654; C:GO:0005634; P:GO:0016180; C:GO:0031965; P:GO:0001832; P:GO:0001833; P:GO:0043066; P:GO:0043154; C:GO:0016020; C:GO:0016021; C:GO:0032039	P:U2 snRNA 3'-end processing; P:snRNA transcription from RNA polymerase II promoter; F:molecular_function; C:nucleoplasm; C:nucleus; P:snRNA processing; C:nuclear membrane; P:blastocyst growth; P:inner cell mass cell proliferation; P:negative regulation of apoptotic process; P:negative regulation of cysteine-type endopeptidase activity involved in apoptotic process; C:membrane; C:integral compone…
AgB01_g730_t01	---NA---	105
AgB01_g731_t03	---NA---	99
AgB01_g732_t01	Mannose-P-dolichol utilization defect 1	191	20	3.86782e-98	56.75	9	C:GO:0070062; C:GO:0005739; C:GO:0016020; C:GO:0016021; C:GO:0005783; P:GO:0009312; P:GO:0006810; P:GO:0006488; F:GO:0003674	C:extracellular exosome; C:mitochondrion; C:membrane; C:integral component of membrane; C:endoplasmic reticulum; P:oligosaccharide biosynthetic process; P:transport; P:dolichol-linked oligosaccharide biosynthetic process; F:molecular_function
AgB01_g733_t02	hypothetical protein LOAG_08627	1300	1	4.92321e-17	53
AgB01_g734_t01	Translational activator GCN1	580	20	0	72.15	7	P:GO:0006417; F:GO:0019901; P:GO:0045859; F:GO:0043022; P:GO:0033554; P:GO:0033674; F:GO:0019887	P:regulation of translation; F:protein kinase binding; P:regulation of protein kinase activity; F:ribosome binding; P:cellular response to stress; P:positive regulation of kinase activity; F:protein kinase regulator activity
AgB01_g735_t01	Transmembrane 39A	190	20	6.46934e-91	67.25	6	P:GO:0019915; P:GO:0040011; P:GO:0010171; C:GO:0016020; C:GO:0016021; P:GO:0040018	P:lipid storage; P:locomotion; P:body morphogenesis; C:membrane; C:integral component of membrane; P:positive regulation of multicellular organism growth
AgB01_g736_t02	oco domain-containing family	487	20	0	57.5	20	F:GO:0019904; P:GO:0040001; P:GO:0007400; P:GO:0051294; P:GO:0008356; C:GO:0045179; P:GO:0008105; P:GO:0045185; P:GO:0000132; P:GO:0007405; F:GO:0005515; C:GO:0045177; P:GO:0045167; P:GO:0045175; C:GO:0005938; P:GO:0050790; C:GO:0016020; C:GO:0016021; P:GO:0055059; F:GO:0030695	F:protein domain specific binding; P:establishment of mitotic spindle localization; P:neuroblast fate determination; P:establishment of spindle orientation; P:asymmetric cell division; C:apical cortex; P:asymmetric protein localization; P:maintenance of protein location; P:establishment of mitotic spindle orientation; P:neuroblast proliferation; F:protein binding; C:apical part of cell; P:asymmet…
AgB01_g737_t01	iEsterase family member (pde-4)	305	20	2.42228e-136	69.05	32	C:GO:0014069; P:GO:0040013; C:GO:0008021; C:GO:0045202; C:GO:0000930; P:GO:0032729; C:GO:0043197; C:GO:0005829; F:GO:0008081; P:GO:0050852; P:GO:0032743; P:GO:0007165; P:GO:0035690; C:GO:0060076; P:GO:0030818; P:GO:0006198; F:GO:0043015; P:GO:0001780; P:GO:0043951; F:GO:0004115; F:GO:0004114; C:GO:0005813; P:GO:0071222; F:GO:0046872; C:GO:0016020; C:GO:0016021; P:GO:0030593; P:GO:0030431; F:GO:00…	C:postsynaptic density; P:negative regulation of locomotion; C:synaptic vesicle; C:synapse; C:gamma-tubulin complex; P:positive regulation of interferon-gamma production; C:dendritic spine; C:cytosol; F:phosphoric diester hydrolase activity; P:T cell receptor signaling pathway; P:positive regulation of interleukin-2 production; P:signal transduction; P:cellular response to drug; C:excitatory syna…
AgB01_g738_t01	Transthyretin 46	156	20	1.96546e-110	70.05	5	C:GO:0005615; F:GO:0003735; C:GO:0005576; C:GO:0005840; P:GO:0006412	C:extracellular space; F:structural constituent of ribosome; C:extracellular region; C:ribosome; P:translation
AgB01_g739_t01	EF-hand domain-containing D2	222	20	4.93752e-129	68.05	5	C:GO:0070062; P:GO:0031175; F:GO:0005509; C:GO:0005739; C:GO:0005743	C:extracellular exosome; P:neuron projection development; F:calcium ion binding; C:mitochondrion; C:mitochondrial inner membrane
AgB01_g740_t02	Galactoside-binding lectin family	163	20	1.68127e-108	68.2	11	C:GO:0030008; P:GO:0008150; C:GO:0070062; F:GO:0016936; C:GO:0016020; C:GO:0016021; C:GO:0005829; F:GO:0030246; C:GO:0005575; P:GO:0006810; P:GO:0098792	C:TRAPP complex; P:biological_process; C:extracellular exosome; F:galactoside binding; C:membrane; C:integral component of membrane; C:cytosol; F:carbohydrate binding; C:cellular_component; P:transport; P:xenophagy
AgB01_g741_t01	---NA---	116
AgB01_g742_t01	---NA---	143
AgB01_g743_t01	Transmembrane 39A	503	20	0	61	11	P:GO:0019915; P:GO:0040011; P:GO:0010171; C:GO:0016020; C:GO:0016021; P:GO:0098779; P:GO:0002230; C:GO:0005575; P:GO:0098792; F:GO:0003674; P:GO:0040018	P:lipid storage; P:locomotion; P:body morphogenesis; C:membrane; C:integral component of membrane; P:positive regulation of macromitophagy in response to mitochondrial depolarization; P:positive regulation of defense response to virus by host; C:cellular_component; P:xenophagy; F:molecular_function; P:positive regulation of multicellular organism growth
AgB01_g744_t01	Exportin-5	172	3	1.0958e-96	71.33
AgB01_g745_t01	exportin 5	409	20	0	52	25	P:GO:1900370; F:GO:0090631; P:GO:0015031; F:GO:0008565; P:GO:0035281; P:GO:0006886; C:GO:0005654; F:GO:0003723; C:GO:0005829; F:GO:0003729; F:GO:0070883; P:GO:0006611; C:GO:0042565; F:GO:0000049; P:GO:0006810; F:GO:0008536; P:GO:0046825; C:GO:0005622; F:GO:0005049; F:GO:0003723; C:GO:0005634; F:GO:0005515; P:GO:0006405; C:GO:0005737; P:GO:0031047	P:positive regulation of RNA interference; F:pre-miRNA transporter activity; P:protein transport; F:protein transporter activity; P:pre-miRNA export from nucleus; P:intracellular protein transport; C:nucleoplasm; F:RNA binding; C:cytosol; F:mRNA binding; F:pre-miRNA binding; P:protein export from nucleus; C:RNA nuclear export complex; F:tRNA binding; P:transport; F:Ran GTPase binding; P:regulatio…
AgB01_g746_t01	exportin 5	523	20	0	46	25	P:GO:1900370; F:GO:0090631; P:GO:0015031; P:GO:0046854; F:GO:0008565; P:GO:0035281; P:GO:0006886; C:GO:0005654; F:GO:0003723; F:GO:0003729; F:GO:0070883; P:GO:0006611; C:GO:0042565; F:GO:0000049; P:GO:0006810; F:GO:0008536; P:GO:0046825; C:GO:0005622; F:GO:0005049; F:GO:0003723; C:GO:0005634; P:GO:0006405; P:GO:0048015; C:GO:0005737; P:GO:0031047	P:positive regulation of RNA interference; F:pre-miRNA transporter activity; P:protein transport; P:phosphatidylinositol phosphorylation; F:protein transporter activity; P:pre-miRNA export from nucleus; P:intracellular protein transport; C:nucleoplasm; F:RNA binding; F:mRNA binding; F:pre-miRNA binding; P:protein export from nucleus; C:RNA nuclear export complex; F:tRNA binding; P:transport; F:Ra…
AgB01_g747_t02	---NA---	162
AgB01_g748_t01	G- coupled receptor	127	9	4.32213e-22	72.56	2	C:GO:0016020; C:GO:0016021	C:membrane; C:integral component of membrane
AgB01_g749_t01	G- coupled receptor	104	3	1.76102e-48	74.67
AgB01_g750_t03	elegans ly confirmed by transcript evidence	589	20	0	68.95	17	P:GO:0019915; F:GO:0016627; P:GO:0055088; F:GO:0009055; P:GO:0008152; C:GO:0005782; P:GO:0006631; F:GO:0003995; C:GO:0005777; F:GO:0003997; P:GO:0033539; P:GO:0006635; F:GO:0050660; F:GO:0000062; F:GO:0052890; P:GO:1904070; P:GO:0055114	P:lipid storage; F:oxidoreductase activity, acting on the CH-CH group of donors; P:lipid homeostasis; F:electron carrier activity; P:metabolic process; C:peroxisomal matrix; P:fatty acid metabolic process; F:acyl-CoA dehydrogenase activity; C:peroxisome; F:acyl-CoA oxidase activity; P:fatty acid beta-oxidation using acyl-CoA dehydrogenase; P:fatty acid beta-oxidation; F:flavin adenine dinucleotid…
AgB01_g751_t02	Hypothetical kDa in chromosome	522	15	7.47171e-34	44.47	5	F:GO:0008168; F:GO:0016740; P:GO:0006898; P:GO:0000003; P:GO:0032259	F:methyltransferase activity; F:transferase activity; P:receptor-mediated endocytosis; P:reproduction; P:methylation
AgB01_g752_t01	GATA zinc finger domain-containing 1	242	20	8.29616e-142	60.05	7	C:GO:0005634; F:GO:0003700; F:GO:0008270; F:GO:0046872; P:GO:0006355; F:GO:0043565; C:GO:0005654	C:nucleus; F:transcription factor activity, sequence-specific DNA binding; F:zinc ion binding; F:metal ion binding; P:regulation of transcription, DNA-templated; F:sequence-specific DNA binding; C:nucleoplasm
AgB01_g753_t01	MEChanosensory abnormality family member (mec-2)	286	20	0	81.4	11	P:GO:0007638; C:GO:0005911; F:GO:0015485; P:GO:0040011; P:GO:0042493; C:GO:0016020; C:GO:0016021; C:GO:0043005; C:GO:0030424; P:GO:0009612; C:GO:0032589	P:mechanosensory behavior; C:cell-cell junction; F:cholesterol binding; P:locomotion; P:response to drug; C:membrane; C:integral component of membrane; C:neuron projection; C:axon; P:response to mechanical stimulus; C:neuron projection membrane
AgB01_g754_t01	---NA---	68
AgB01_g755_t01	---NA---	129
AgB01_g756_t01	LAG1 longevity assurance 5	339	20	0	57.3	15	P:GO:0040012; F:GO:0050291; P:GO:0046513; C:GO:0005783; P:GO:0007568; P:GO:0006665; C:GO:0005789; F:GO:0003677; C:GO:0016020; P:GO:0006629; C:GO:0016021; P:GO:0010467; F:GO:0016740; F:GO:0016410; C:GO:0030424	P:regulation of locomotion; F:sphingosine N-acyltransferase activity; P:ceramide biosynthetic process; C:endoplasmic reticulum; P:aging; P:sphingolipid metabolic process; C:endoplasmic reticulum membrane; F:DNA binding; C:membrane; P:lipid metabolic process; C:integral component of membrane; P:gene expression; F:transferase activity; F:N-acyltransferase activity; C:axon
AgB01_g757_t01	---NA---	126
AgB01_g758_t01	Nascent polypeptide-associated complex subunit alpha	157	20	4.65851e-112	81.15	19	P:GO:0019915; P:GO:0040035; P:GO:0040011; P:GO:0008340; P:GO:0009792; P:GO:0010171; P:GO:0015031; F:GO:0005388; P:GO:0006810; P:GO:0006950; P:GO:0000003; P:GO:0040039; F:GO:0005515; P:GO:0008406; P:GO:0002119; P:GO:0045132; P:GO:0070588; P:GO:0018996; F:GO:0016787	P:lipid storage; P:hermaphrodite genitalia development; P:locomotion; P:determination of adult lifespan; P:embryo development ending in birth or egg hatching; P:body morphogenesis; P:protein transport; F:calcium-transporting ATPase activity; P:transport; P:response to stress; P:reproduction; P:inductive cell migration; F:protein binding; P:gonad development; P:nematode larval development; P:meiot…
AgB01_g759_t02	60S ribosomal L17	186	20	3.70064e-125	86.7	12	F:GO:0003735; C:GO:0030529; P:GO:0002119; P:GO:0040011; P:GO:0009792; P:GO:0006915; C:GO:0015934; C:GO:0005840; C:GO:0005622; P:GO:0000003; P:GO:0006412; P:GO:0007413	F:structural constituent of ribosome; C:intracellular ribonucleoprotein complex; P:nematode larval development; P:locomotion; P:embryo development ending in birth or egg hatching; P:apoptotic process; C:large ribosomal subunit; C:ribosome; C:intracellular; P:reproduction; P:translation; P:axonal fasciculation
AgB01_g760_t01	hypothetical protein Bm1_01085	266	6	2.27211e-39	52.33	2	C:GO:0016020; C:GO:0016021	C:membrane; C:integral component of membrane
AgB01_g761_t01	hypothetical protein LOAG_11950	314	3	8.91082e-61	57.33
AgB01_g762_t03	mRNA export	427	20	0	77.05	23	P:GO:0040013; P:GO:0040035; P:GO:0040011; P:GO:0009792; F:GO:0016905; P:GO:0015031; C:GO:0045202; P:GO:0006468; C:GO:0042995; P:GO:0006898; P:GO:0006810; P:GO:0000972; P:GO:0000003; C:GO:0005643; C:GO:0005634; P:GO:0006405; F:GO:0003723; F:GO:0043130; P:GO:0006606; C:GO:0030054; F:GO:0016740; P:GO:0051028; C:GO:0030424	P:negative regulation of locomotion; P:hermaphrodite genitalia development; P:locomotion; P:embryo development ending in birth or egg hatching; F:myosin heavy chain kinase activity; P:protein transport; C:synapse; P:protein phosphorylation; C:cell projection; P:receptor-mediated endocytosis; P:transport; P:transcription-dependent tethering of RNA polymerase II gene DNA at nuclear periphery; P:rep…
AgB01_g763_t01	---NA---	123
AgB01_g764_t02	Hydroxymethylglutaryl- lyase	135	20	9.94234e-95	76.85	16	F:GO:0042803; F:GO:0016829; P:GO:0046951; F:GO:0005102; P:GO:0007005; F:GO:0000287; C:GO:0005777; F:GO:0003824; F:GO:0046872; P:GO:0051262; F:GO:0004419; C:GO:0005739; C:GO:0016020; P:GO:0006629; C:GO:0016021; F:GO:0030145	F:protein homodimerization activity; F:lyase activity; P:ketone body biosynthetic process; F:receptor binding; P:mitochondrion organization; F:magnesium ion binding; C:peroxisome; F:catalytic activity; F:metal ion binding; P:protein tetramerization; F:hydroxymethylglutaryl-CoA lyase activity; C:mitochondrion; C:membrane; P:lipid metabolic process; C:integral component of membrane; F:manganese ion…
AgB01_g765_t01	Spectrin alpha chain	2433	20	0	83.35	4	F:GO:0004725; F:GO:0005509; P:GO:0035335; F:GO:0016787	F:protein tyrosine phosphatase activity; F:calcium ion binding; P:peptidyl-tyrosine dephosphorylation; F:hydrolase activity
AgB01_g766_t01	Spectrin alpha	121	20	2.22242e-62	72.85	33	P:GO:0007293; P:GO:0007274; P:GO:0007294; P:GO:0008302; C:GO:0005794; P:GO:0060429; C:GO:0045169; P:GO:0007308; P:GO:0007009; P:GO:0030727; P:GO:0042062; F:GO:0005509; P:GO:0030707; C:GO:0031594; P:GO:0016199; P:GO:0035335; C:GO:0045170; P:GO:0050807; P:GO:0045478; P:GO:0007026; C:GO:0005886; F:GO:0008017; C:GO:0005811; P:GO:0048790; P:GO:0007417; F:GO:0003779; F:GO:0004725; C:GO:0005938; P:GO:00…	P:germarium-derived egg chamber formation; P:neuromuscular synaptic transmission; P:germarium-derived oocyte fate determination; P:female germline ring canal formation, actin assembly; C:Golgi apparatus; P:epithelium development; C:fusome; P:oocyte construction; P:plasma membrane organization; P:germarium-derived female germ-line cyst formation; P:long-term strengthening of neuromuscular junction…
AgB01_g767_t06	Lin-12 and glp-1 x-hybridizing isoform ly confirmed by transcript evidence	600	20	1.74808e-100	42.4	9	F:GO:0004568; F:GO:0016810; P:GO:0005975; F:GO:0008061; F:GO:0003824; P:GO:0006032; P:GO:0006030; C:GO:0005783; C:GO:0005576	F:chitinase activity; F:hydrolase activity, acting on carbon-nitrogen (but not peptide) bonds; P:carbohydrate metabolic process; F:chitin binding; F:catalytic activity; P:chitin catabolic process; P:chitin metabolic process; C:endoplasmic reticulum; C:extracellular region
AgB01_g768_t01	EB module family	122	11	1.47216e-18	53.82	7	F:GO:0004568; F:GO:0016810; P:GO:0005975; F:GO:0008061; P:GO:0006032; F:GO:0003824; C:GO:0005576	F:chitinase activity; F:hydrolase activity, acting on carbon-nitrogen (but not peptide) bonds; P:carbohydrate metabolic process; F:chitin binding; P:chitin catabolic process; F:catalytic activity; C:extracellular region
AgB01_g769_t02	Prion-like-(Q N-rich) domain-bearing 25	1478	20	0	43.65	8	F:GO:0004568; F:GO:0016810; P:GO:0005975; F:GO:0008061; F:GO:0003824; P:GO:0006032; C:GO:0005783; C:GO:0005576	F:chitinase activity; F:hydrolase activity, acting on carbon-nitrogen (but not peptide) bonds; P:carbohydrate metabolic process; F:chitin binding; F:catalytic activity; P:chitin catabolic process; C:endoplasmic reticulum; C:extracellular region
AgB01_g770_t01	EB module family	196	12	1.95009e-23	65.42	7	F:GO:0004568; F:GO:0016810; P:GO:0005975; F:GO:0008061; P:GO:0006032; F:GO:0003824; C:GO:0005576	F:chitinase activity; F:hydrolase activity, acting on carbon-nitrogen (but not peptide) bonds; P:carbohydrate metabolic process; F:chitin binding; P:chitin catabolic process; F:catalytic activity; C:extracellular region
AgB01_g771_t02	Endoplasmic reticulum mannosyl-oligosaccharide 1,2-alpha-mannosidase	599	20	0	73.5	12	P:GO:0097466; P:GO:0006491; F:GO:0005509; P:GO:0009792; P:GO:0008152; C:GO:0016020; C:GO:0016021; F:GO:0004571; C:GO:0005783; P:GO:0030433; F:GO:0016787; F:GO:0016798	P:glycoprotein ERAD pathway; P:N-glycan processing; F:calcium ion binding; P:embryo development ending in birth or egg hatching; P:metabolic process; C:membrane; C:integral component of membrane; F:mannosyl-oligosaccharide 1,2-alpha-mannosidase activity; C:endoplasmic reticulum; P:ER-associated ubiquitin-dependent protein catabolic process; F:hydrolase activity; F:hydrolase activity, acting on gl…
AgB01_g772_t06	hypothetical protein Bm1_02345	606	7	6.74352e-76	53.57
AgB01_g773_t01	hypothetical protein CRE_00696	398	6	1.98759e-55	61.83
AgB01_g774_t02	elegans ly confirmed by transcript evidence	1310	10	7.7189e-140	45.7	2	C:GO:0016020; C:GO:0016021	C:membrane; C:integral component of membrane
AgB01_g775_t02	---NA---	535
AgB01_g776_t02	Poly(U)-specific endoribonuclease	320	20	0	64.1	23	F:GO:0016788; P:GO:0090502; P:GO:0090305; F:GO:0044824; F:GO:0005044; F:GO:0008236; F:GO:0043765; C:GO:0005576; P:GO:0006898; F:GO:0042578; F:GO:0004521; C:GO:0005634; P:GO:0006955; F:GO:0003723; C:GO:0005737; F:GO:0046872; F:GO:0004519; F:GO:0004518; C:GO:0016020; P:GO:0006508; C:GO:0016021; F:GO:0030247; F:GO:0016787	F:hydrolase activity, acting on ester bonds; P:RNA phosphodiester bond hydrolysis, endonucleolytic; P:nucleic acid phosphodiester bond hydrolysis; F:retroviral 3' processing activity; F:scavenger receptor activity; F:serine-type peptidase activity; F:T/G mismatch-specific endonuclease activity; C:extracellular region; P:receptor-mediated endocytosis; F:phosphoric ester hydrolase activity; F:endor…
AgB01_g777_t01	Galactoside-binding lectin family	296	20	0	73.95	6	F:GO:0005515; C:GO:0060102; F:GO:0016936; C:GO:0045121; F:GO:0030246; C:GO:0005886	F:protein binding; C:collagen and cuticulin-based cuticle extracellular matrix; F:galactoside binding; C:membrane raft; F:carbohydrate binding; C:plasma membrane
AgB01_g778_t03	elegans ly confirmed by transcript evidence	358	7	7.88937e-88	55.86	3	C:GO:0005615; F:GO:0004866; P:GO:0010951	C:extracellular space; F:endopeptidase inhibitor activity; P:negative regulation of endopeptidase activity
AgB01_g779_t01	hypothetical protein LOAG_05791	272	2	6.39004e-39	50.5	2	F:GO:0004866; P:GO:0010951	F:endopeptidase inhibitor activity; P:negative regulation of endopeptidase activity
AgB01_g780_t02	gonadotropin-releasing hormone receptor 2	221	20	1.94708e-57	56.1	15	P:GO:1904066; P:GO:0007186; P:GO:0007165; P:GO:0040011; P:GO:0007200; F:GO:0004871; C:GO:0005886; F:GO:0004930; C:GO:0005887; F:GO:0008528; P:GO:0007218; P:GO:0002119; F:GO:0046982; C:GO:0016020; C:GO:0016021	P:G-protein coupled receptor signaling pathway involved in dauer larval development; P:G-protein coupled receptor signaling pathway; P:signal transduction; P:locomotion; P:phospholipase C-activating G-protein coupled receptor signaling pathway; F:signal transducer activity; C:plasma membrane; F:G-protein coupled receptor activity; C:integral component of plasma membrane; F:G-protein coupled pepti…
AgB01_g781_t02	elegans ly confirmed by transcript evidence	373	20	1.89667e-53	48.8	15	P:GO:1904066; P:GO:0007186; P:GO:0007165; P:GO:0040011; P:GO:0007200; F:GO:0004871; C:GO:0005886; F:GO:0004930; C:GO:0005887; F:GO:0008528; P:GO:0007218; P:GO:0002119; F:GO:0046982; C:GO:0016020; C:GO:0016021	P:G-protein coupled receptor signaling pathway involved in dauer larval development; P:G-protein coupled receptor signaling pathway; P:signal transduction; P:locomotion; P:phospholipase C-activating G-protein coupled receptor signaling pathway; F:signal transducer activity; C:plasma membrane; F:G-protein coupled receptor activity; C:integral component of plasma membrane; F:G-protein coupled pepti…
AgB01_g782_t03	complement component C3	289	20	2.79619e-63	48.2	4	C:GO:0005615; F:GO:0004866; P:GO:0010951; C:GO:0005576	C:extracellular space; F:endopeptidase inhibitor activity; P:negative regulation of endopeptidase activity; C:extracellular region
AgB01_g783_t05	Neurogenic locus Notch	1672	20	0	53.9	147	P:GO:0061331; P:GO:0035165; P:GO:0035167; P:GO:0007252; P:GO:0035162; P:GO:0008340; P:GO:0036011; P:GO:0036099; P:GO:0009952; P:GO:0007498; P:GO:0030708; P:GO:0007015; P:GO:0007411; P:GO:0008587; P:GO:0008347; P:GO:0051489; P:GO:0050793; P:GO:0045893; F:GO:0016491; F:GO:0005509; P:GO:0030707; P:GO:0001708; P:GO:0035155; P:GO:0035157; F:GO:0032440; P:GO:0035153; P:GO:0007422; P:GO:0008356; C:GO:00…	P:epithelial cell proliferation involved in Malpighian tubule morphogenesis; P:embryonic crystal cell differentiation; P:larval lymph gland hemopoiesis; P:I-kappaB phosphorylation; P:embryonic hemopoiesis; P:determination of adult lifespan; P:imaginal disc-derived leg segmentation; P:female germ-line stem cell population maintenance; P:anterior/posterior pattern specification; P:mesoderm developm…
AgB01_g784_t01	60S ribosomal L5	296	20	2.74479e-157	74.4	19	P:GO:0043009; P:GO:0040035; P:GO:0009792; F:GO:0008097; P:GO:0010171; C:GO:0022625; C:GO:0005840; P:GO:0000027; C:GO:0005622; P:GO:0000003; P:GO:0006412; F:GO:0003723; F:GO:0003735; C:GO:0030529; C:GO:0005737; P:GO:0002119; F:GO:0019843; P:GO:0032502; F:GO:0016787	P:chordate embryonic development; P:hermaphrodite genitalia development; P:embryo development ending in birth or egg hatching; F:5S rRNA binding; P:body morphogenesis; C:cytosolic large ribosomal subunit; C:ribosome; P:ribosomal large subunit assembly; C:intracellular; P:reproduction; P:translation; F:RNA binding; F:structural constituent of ribosome; C:intracellular ribonucleoprotein complex; C:…
AgB01_g785_t01	---NA---	147
AgB01_g786_t01	---NA---	98
AgB01_g787_t01	---NA---	119
AgB01_g788_t01	---NA---	109
AgB01_g789_t01	Surfeit locus 4	46	20	4.21674e-21	91	16	P:GO:0040027; P:GO:0019915; P:GO:0040035; P:GO:0040011; P:GO:1903364; P:GO:0009792; C:GO:0005783; C:GO:0005793; P:GO:0042059; P:GO:0000003; C:GO:0005789; C:GO:0048471; P:GO:0002119; C:GO:0016020; C:GO:0016021; P:GO:0032940	P:negative regulation of vulval development; P:lipid storage; P:hermaphrodite genitalia development; P:locomotion; P:positive regulation of cellular protein catabolic process; P:embryo development ending in birth or egg hatching; C:endoplasmic reticulum; C:endoplasmic reticulum-Golgi intermediate compartment; P:negative regulation of epidermal growth factor receptor signaling pathway; P:reproduct…
AgB01_g790_t07	dyslexia-associated KIAA0319 -like	419	20	0	50.45	10	P:GO:0008150; F:GO:0005515; C:GO:0070062; C:GO:0016020; C:GO:0016021; C:GO:0031410; C:GO:0000139; C:GO:0005794; F:GO:0003674; C:GO:0005886	P:biological_process; F:protein binding; C:extracellular exosome; C:membrane; C:integral component of membrane; C:cytoplasmic vesicle; C:Golgi membrane; C:Golgi apparatus; F:molecular_function; C:plasma membrane
AgB01_g791_t02	Trafficking particle complex subunit 9	1276	20	0	52.05	14	P:GO:0055085; P:GO:0030182; C:GO:0005770; C:GO:0005783; C:GO:0005794; P:GO:0021987; P:GO:0051092; C:GO:0005802; C:GO:0005769; F:GO:0005515; C:GO:0005737; C:GO:0016020; C:GO:0016021; P:GO:0030154	P:transmembrane transport; P:neuron differentiation; C:late endosome; C:endoplasmic reticulum; C:Golgi apparatus; P:cerebral cortex development; P:positive regulation of NF-kappaB transcription factor activity; C:trans-Golgi network; C:early endosome; F:protein binding; C:cytoplasm; C:membrane; C:integral component of membrane; P:cell differentiation
AgB01_g792_t02	elegans ly confirmed by transcript evidence	178	20	1.69905e-21	54.3	14	P:GO:0055085; P:GO:0015695; F:GO:0022857; F:GO:0005275; F:GO:0008514; F:GO:0005215; P:GO:1902603; C:GO:0005887; F:GO:0022891; C:GO:0016020; C:GO:0016021; P:GO:0015837; P:GO:0015711; F:GO:0015226	P:transmembrane transport; P:organic cation transport; F:transmembrane transporter activity; F:amine transmembrane transporter activity; F:organic anion transmembrane transporter activity; F:transporter activity; P:carnitine transmembrane transport; C:integral component of plasma membrane; F:substrate-specific transmembrane transporter activity; C:membrane; C:integral component of membrane; P:ami…
AgB01_g793_t01	---NA---	98
AgB01_g794_t01	---NA---	194
AgB01_g795_t01	---NA---	202
AgB01_g796_t01	conserved Plasmodium	105	2	6.835e-06	78	2	C:GO:0020011; F:GO:0016740	C:apicoplast; F:transferase activity
AgB01_g797_t04	RNA dependent RNA polymerase family	753	20	0	53.75	21	P:GO:0007281; P:GO:0031081; P:GO:0007283; P:GO:0009792; P:GO:0010171; P:GO:0000910; P:GO:0007276; C:GO:0070090; P:GO:0000003; C:GO:0000794; C:GO:0005634; C:GO:0005737; P:GO:0002119; P:GO:0048477; F:GO:0003968; P:GO:0001172; C:GO:0043186; C:GO:0016020; P:GO:0045132; P:GO:0016246; P:GO:0031048	P:germ cell development; P:nuclear pore distribution; P:spermatogenesis; P:embryo development ending in birth or egg hatching; P:body morphogenesis; P:cytokinesis; P:gamete generation; C:metaphase plate; P:reproduction; C:condensed nuclear chromosome; C:nucleus; C:cytoplasm; P:nematode larval development; P:oogenesis; F:RNA-directed 5'-3' RNA polymerase activity; P:transcription, RNA-templated; C…
AgB01_g798_t02	RNA dependent RNA polymerase family	217	3	2.33502e-131	74.33	2	F:GO:0003968; P:GO:0001172	F:RNA-directed 5'-3' RNA polymerase activity; P:transcription, RNA-templated
AgB01_g799_t01	mitogen-activated kinase kinase 7	407	20	0	70.45	45	P:GO:0072709; P:GO:0018108; F:GO:0008022; P:GO:1904355; P:GO:0038095; P:GO:0007257; P:GO:0007254; P:GO:0009411; P:GO:0006468; P:GO:0023014; P:GO:0043525; F:GO:0008545; F:GO:0000287; F:GO:0000166; F:GO:0005524; P:GO:0000187; P:GO:0009408; F:GO:0004713; P:GO:0006915; C:GO:0005829; P:GO:0016310; F:GO:0031435; P:GO:0035897; P:GO:0051403; F:GO:0019901; F:GO:0019903; P:GO:0007165; P:GO:0006970; F:GO:00…	P:cellular response to sorbitol; P:peptidyl-tyrosine phosphorylation; F:protein C-terminus binding; P:positive regulation of telomere capping; P:Fc-epsilon receptor signaling pathway; P:activation of JUN kinase activity; P:JNK cascade; P:response to UV; P:protein phosphorylation; P:signal transduction by protein phosphorylation; P:positive regulation of neuron apoptotic process; F:JUN kinase kina…
AgB01_g800_t02	hypothetical protein Bm1_27970	256	2	2.75121e-60	54.5
AgB01_g801_t01	hypothetical protein Bm1_27975	1034	2	7.75993e-120	54
AgB01_g802_t01	---NA---	96
AgB01_g803_t02	cytoplasmic NCK1	225	11	4.6025e-06	59.09	36	P:GO:0036493; P:GO:0051707; P:GO:0042110; P:GO:1902237; P:GO:0060548; P:GO:0007015; P:GO:0045944; F:GO:0004860; P:GO:0043547; P:GO:1990441; P:GO:0070262; C:GO:0005802; C:GO:0000164; F:GO:0071074; P:GO:0016192; P:GO:0033137; P:GO:1904030; P:GO:0016477; F:GO:0019904; F:GO:0005086; P:GO:1903898; P:GO:1903679; P:GO:1903676; C:GO:0005783; P:GO:0042102; C:GO:0005840; P:GO:0006930; F:GO:0005102; C:GO:00…	P:positive regulation of translation in response to endoplasmic reticulum stress; P:response to other organism; P:T cell activation; P:positive regulation of endoplasmic reticulum stress-induced intrinsic apoptotic signaling pathway; P:negative regulation of cell death; P:actin filament organization; P:positive regulation of transcription from RNA polymerase II promoter; F:protein kinase inhibito…
AgB01_g804_t04	elegans confirmed by transcript evidence	220	15	1.22074e-81	52.87	3	P:GO:0006915; P:GO:0000910; P:GO:0000003	P:apoptotic process; P:cytokinesis; P:reproduction
AgB01_g805_t01	hypothetical protein LOAG_03325	130	3	9.18638e-36	63	2	C:GO:0016020; C:GO:0016021	C:membrane; C:integral component of membrane
AgB01_g806_t03	Leucine rich repeat containing 59	169	20	1.20541e-114	73.55	14	P:GO:0008150; C:GO:0005783; C:GO:0031090; F:GO:0003723; C:GO:0042645; C:GO:0005635; C:GO:0005789; F:GO:0098641; C:GO:0005634; C:GO:0005913; C:GO:0043231; C:GO:0016020; C:GO:0016021; P:GO:0098609	P:biological_process; C:endoplasmic reticulum; C:organelle membrane; F:RNA binding; C:mitochondrial nucleoid; C:nuclear envelope; C:endoplasmic reticulum membrane; F:cadherin binding involved in cell-cell adhesion; C:nucleus; C:cell-cell adherens junction; C:intracellular membrane-bounded organelle; C:membrane; C:integral component of membrane; P:cell-cell adhesion
AgB01_g807_t01	---NA---	189
AgB01_g808_t02	hypothetical protein Bm1_35650	326	5	3.10085e-22	47.4
AgB01_g809_t01	G- coupled receptor	391	14	0	56.07	11	C:GO:0005887; F:GO:0004930; F:GO:0008528; P:GO:0007218; P:GO:0007186; P:GO:0007165; C:GO:0016020; C:GO:0016021; P:GO:0007200; F:GO:0004871; C:GO:0005886	C:integral component of plasma membrane; F:G-protein coupled receptor activity; F:G-protein coupled peptide receptor activity; P:neuropeptide signaling pathway; P:G-protein coupled receptor signaling pathway; P:signal transduction; C:membrane; C:integral component of membrane; P:phospholipase C-activating G-protein coupled receptor signaling pathway; F:signal transducer activity; C:plasma membrane
AgB01_g810_t02	AMP-binding enzyme family	436	20	0	72.6	10	F:GO:0031957; P:GO:0015908; F:GO:0003824; P:GO:0008152; C:GO:0016020; C:GO:0016021; C:GO:0005783; F:GO:0016874; F:GO:0004467; F:GO:0047747	F:very long-chain fatty acid-CoA ligase activity; P:fatty acid transport; F:catalytic activity; P:metabolic process; C:membrane; C:integral component of membrane; C:endoplasmic reticulum; F:ligase activity; F:long-chain fatty acid-CoA ligase activity; F:cholate-CoA ligase activity
AgB01_g811_t01	---NA---	99
AgB01_g812_t05	Corepressor interacting with RBPJ 1	156	4	1.55722e-49	75.25
AgB01_g813_t01	Ubiquitin carboxyl-terminal hydrolase 16	710	20	0	47.5	35	P:GO:0009952; P:GO:0045944; P:GO:0045901; P:GO:0051301; P:GO:0051289; F:GO:0043130; P:GO:0045893; F:GO:0016491; P:GO:0051726; P:GO:0016578; P:GO:0016579; F:GO:0008270; P:GO:0006351; F:GO:0032440; F:GO:0004197; P:GO:0006355; P:GO:0007067; F:GO:0008234; F:GO:0008233; P:GO:0006974; P:GO:0007049; P:GO:0006357; P:GO:0006511; F:GO:0004843; C:GO:0005634; F:GO:0003713; F:GO:0046872; F:GO:0042393; P:GO:00…	P:anterior/posterior pattern specification; P:positive regulation of transcription from RNA polymerase II promoter; P:positive regulation of translational elongation; P:cell division; P:protein homotetramerization; F:ubiquitin binding; P:positive regulation of transcription, DNA-templated; F:oxidoreductase activity; P:regulation of cell cycle; P:histone deubiquitination; P:protein deubiquitinatio…
AgB01_g814_t01	ubiquitin carboxyl-terminal hydrolase	139	2	8.72104e-20	56.5	9	P:GO:0016579; F:GO:0008270; F:GO:0046872; P:GO:0006508; F:GO:0008234; F:GO:0008233; F:GO:0036459; F:GO:0016787; P:GO:0006511	P:protein deubiquitination; F:zinc ion binding; F:metal ion binding; P:proteolysis; F:cysteine-type peptidase activity; F:peptidase activity; F:thiol-dependent ubiquitinyl hydrolase activity; F:hydrolase activity; P:ubiquitin-dependent protein catabolic process
AgB01_g815_t04	---NA---	88
AgB01_g816_t01	IWS1 family	392	20	0	55.25	16	P:GO:0090239; P:GO:0008380; P:GO:2001253; P:GO:0006351; P:GO:0040011; P:GO:0006355; P:GO:0006397; P:GO:0006810; P:GO:0000003; C:GO:0005654; F:GO:0003677; C:GO:0005634; F:GO:0005515; P:GO:0050684; P:GO:0010793; P:GO:0051028	P:regulation of histone H4 acetylation; P:RNA splicing; P:regulation of histone H3-K36 trimethylation; P:transcription, DNA-templated; P:locomotion; P:regulation of transcription, DNA-templated; P:mRNA processing; P:transport; P:reproduction; C:nucleoplasm; F:DNA binding; C:nucleus; F:protein binding; P:regulation of mRNA processing; P:regulation of mRNA export from nucleus; P:mRNA transport
AgB01_g817_t01	---NA---	101
AgB01_g818_t03	L-asparaginase	307	20	0	62.65	4	P:GO:0006508; F:GO:0004067; F:GO:0008798; F:GO:0016787	P:proteolysis; F:asparaginase activity; F:beta-aspartyl-peptidase activity; F:hydrolase activity
AgB01_g819_t03	major facilitator family	494	20	5.81273e-65	38.3	11	P:GO:0015698; C:GO:0005887; F:GO:0022891; P:GO:0055085; F:GO:0022857; P:GO:0043252; C:GO:0016020; C:GO:0016021; F:GO:0005452; F:GO:0005215; F:GO:0015347	P:inorganic anion transport; C:integral component of plasma membrane; F:substrate-specific transmembrane transporter activity; P:transmembrane transport; F:transmembrane transporter activity; P:sodium-independent organic anion transport; C:membrane; C:integral component of membrane; F:inorganic anion exchanger activity; F:transporter activity; F:sodium-independent organic anion transmembrane tran…
AgB01_g820_t01	hypothetical protein LOAG_03705	78	5	1.8897e-13	68.2	6	P:GO:2000480; C:GO:0005634; C:GO:0005737; P:GO:0071901; P:GO:0006469; F:GO:0004862	P:negative regulation of cAMP-dependent protein kinase activity; C:nucleus; C:cytoplasm; P:negative regulation of protein serine/threonine kinase activity; P:negative regulation of protein kinase activity; F:cAMP-dependent protein kinase inhibitor activity
AgB01_g821_t01	---NA---	111
AgB01_g822_t05	Jumonji domain containing 5	599	20	0	58.95	24	P:GO:0016569; P:GO:0008150; P:GO:0006351; P:GO:0008340; P:GO:0006355; F:GO:0008168; F:GO:0003682; F:GO:0004597; P:GO:0006974; C:GO:0005575; P:GO:0007049; F:GO:0003674; F:GO:0051213; C:GO:0005634; P:GO:0000086; F:GO:0046872; P:GO:0045893; F:GO:0016491; P:GO:0070544; P:GO:0055114; F:GO:0016740; F:GO:0008080; F:GO:0051864; P:GO:0032259	P:covalent chromatin modification; P:biological_process; P:transcription, DNA-templated; P:determination of adult lifespan; P:regulation of transcription, DNA-templated; F:methyltransferase activity; F:chromatin binding; F:peptide-aspartate beta-dioxygenase activity; P:cellular response to DNA damage stimulus; C:cellular_component; P:cell cycle; F:molecular_function; F:dioxygenase activity; C:nuc…
AgB01_g823_t03	hypothetical protein LOAG_10579	620	3	6.47488e-21	51	2	C:GO:0016020; C:GO:0016021	C:membrane; C:integral component of membrane
AgB01_g824_t01	glycosyl hydrolase family 20	545	20	0	62.1	45	P:GO:0008360; P:GO:0019915; P:GO:0008049; P:GO:0009313; P:GO:0042552; P:GO:0006044; P:GO:0045944; F:GO:0004563; C:GO:0005575; P:GO:0006689; P:GO:0007338; P:GO:0006687; P:GO:0007605; P:GO:0001501; P:GO:0007626; C:GO:0070062; P:GO:0001525; F:GO:0015929; F:GO:0046982; C:GO:0001669; C:GO:0042582; F:GO:0016231; F:GO:0030246; P:GO:0030203; F:GO:0016798; P:GO:0043615; P:GO:0007040; F:GO:0042803; F:GO:00…	P:regulation of cell shape; P:lipid storage; P:male courtship behavior; P:oligosaccharide catabolic process; P:myelination; P:N-acetylglucosamine metabolic process; P:positive regulation of transcription from RNA polymerase II promoter; F:beta-N-acetylhexosaminidase activity; C:cellular_component; P:ganglioside catabolic process; P:single fertilization; P:glycosphingolipid metabolic process; P:se…
AgB01_g825_t01	---NA---	70
AgB01_g826_t01	---NA---	86
AgB01_g827_t01	Carbonic anhydrase 5	319	20	0	60.15	13	F:GO:0008270; F:GO:0016829; F:GO:0004089; C:GO:0005576; P:GO:0006730; P:GO:0006885; C:GO:0045177; F:GO:0046872; C:GO:0016020; C:GO:0016021; P:GO:0035813; P:GO:0010037; P:GO:0035810	F:zinc ion binding; F:lyase activity; F:carbonate dehydratase activity; C:extracellular region; P:one-carbon metabolic process; P:regulation of pH; C:apical part of cell; F:metal ion binding; C:membrane; C:integral component of membrane; P:regulation of renal sodium excretion; P:response to carbon dioxide; P:positive regulation of urine volume
AgB01_g828_t04	SCY1-like 3 ( cerevisiae)	720	20	0	53.3	10	F:GO:0005524; F:GO:0005515; C:GO:0005737; C:GO:0005794; F:GO:0004672; P:GO:0006468; C:GO:0042995; F:GO:0016301; P:GO:0016477; C:GO:0030027	F:ATP binding; F:protein binding; C:cytoplasm; C:Golgi apparatus; F:protein kinase activity; P:protein phosphorylation; C:cell projection; F:kinase activity; P:cell migration; C:lamellipodium
AgB01_g829_t06	---NA---	108
AgB01_g830_t01	---NA---	102
AgB01_g831_t04	hypothetical protein LOAG_00643	176	1	2.9087e-05	46
AgB01_g832_t01	Ubiquitin carboxyl-terminal hydrolase 7	514	13	2.64827e-30	47.54	1	F:GO:0016787	F:hydrolase activity
AgB01_g833_t04	---NA---	187
AgB01_g834_t04	Solute carrier family facilitated glucose transporter member 5	573	20	0	56.15	14	P:GO:0055085; F:GO:0022857; F:GO:0032440; P:GO:0008643; P:GO:0006810; F:GO:0005215; C:GO:0005886; F:GO:0022891; F:GO:0016491; C:GO:0016020; C:GO:0016021; P:GO:0055114; P:GO:0015758; C:GO:0016323	P:transmembrane transport; F:transmembrane transporter activity; F:2-alkenal reductase [NAD(P)] activity; P:carbohydrate transport; P:transport; F:transporter activity; C:plasma membrane; F:substrate-specific transmembrane transporter activity; F:oxidoreductase activity; C:membrane; C:integral component of membrane; P:oxidation-reduction process; P:glucose transport; C:basolateral plasma membrane
AgB01_g835_t01	---NA---	186
AgB01_g836_t01	---NA---	147
AgB02_g001_t09	---NA---	105
AgB02_g002_t02	---NA---	107
AgB02_g003_t01	---NA---	91
AgB02_g004_t01	enhancer of mRNA-decapping 3-like isoform 1	186	3	2.75003e-09	60	3	C:GO:0005739; F:GO:0003690; P:GO:0006355	C:mitochondrion; F:double-stranded DNA binding; P:regulation of transcription, DNA-templated
AgB02_g005_t01	---NA---	99
AgB02_g006_t02	---NA---	217
AgB02_g007_t01	HMG box family	919	20	0	74.15	9	P:GO:0000122; F:GO:0003677; P:GO:0048286; C:GO:0005634; F:GO:0005515; P:GO:0006351; P:GO:0006355; C:GO:0043234; F:GO:0003682	P:negative regulation of transcription from RNA polymerase II promoter; F:DNA binding; P:lung alveolus development; C:nucleus; F:protein binding; P:transcription, DNA-templated; P:regulation of transcription, DNA-templated; C:protein complex; F:chromatin binding
AgB02_g008_t01	capicua homolog	779	20	0	56.8
AgB02_g009_t01	Dual specificity mitogen-activated kinase kinase 6	360	20	0	76.3	60	P:GO:0018108; P:GO:0093002; P:GO:0060048; P:GO:0023014; P:GO:0009636; F:GO:0004930; P:GO:0000187; P:GO:0046662; P:GO:0002119; P:GO:0006915; F:GO:0031435; P:GO:0050830; P:GO:0051403; F:GO:0019901; P:GO:0038066; P:GO:0007186; P:GO:0008152; F:GO:0004672; P:GO:0000303; P:GO:0000302; F:GO:0004674; F:GO:0004871; C:GO:0005886; C:GO:0005634; F:GO:0004702; F:GO:0005515; P:GO:0051770; F:GO:0046872; F:GO:00…	P:peptidyl-tyrosine phosphorylation; P:response to nematicide; P:cardiac muscle contraction; P:signal transduction by protein phosphorylation; P:response to toxic substance; F:G-protein coupled receptor activity; P:activation of MAPK activity; P:regulation of oviposition; P:nematode larval development; P:apoptotic process; F:mitogen-activated protein kinase kinase kinase binding; P:defense respon…
AgB02_g010_t03	---NA---	215
AgB02_g011_t01	---NA---	155
AgB02_g012_t01	---NA---	104
AgB02_g013_t01	hypothetical protein Bm1_39215	114	2	5.43272e-37	71	2	C:GO:0016020; C:GO:0016021	C:membrane; C:integral component of membrane
AgB02_g014_t01	Phosphoribosylformylglycinamidine synthase	943	20	0	69.15	10	F:GO:0000166; F:GO:0005524; P:GO:0009156; C:GO:0005737; P:GO:0006164; F:GO:0046872; P:GO:0006541; P:GO:0006189; F:GO:0016874; F:GO:0004642	F:nucleotide binding; F:ATP binding; P:ribonucleoside monophosphate biosynthetic process; C:cytoplasm; P:purine nucleotide biosynthetic process; F:metal ion binding; P:glutamine metabolic process; P:'de novo' IMP biosynthetic process; F:ligase activity; F:phosphoribosylformylglycinamidine synthase activity
AgB02_g015_t02	---NA---	102
AgB02_g016_t01	---NA---	115
AgB02_g017_t01	transient receptor potential cation subfamily member 2	613	20	0	47.55	55	F:GO:0015278; F:GO:0005272; C:GO:0043025; P:GO:0051489; F:GO:0047631; F:GO:0005509; P:GO:0098655; P:GO:0051209; P:GO:0071577; P:GO:0071415; P:GO:0044849; P:GO:0034220; P:GO:0014074; P:GO:0006810; C:GO:0005765; C:GO:0005886; C:GO:0005764; C:GO:0030659; P:GO:0002407; P:GO:0098703; P:GO:2000249; P:GO:0035584; P:GO:1903223; C:GO:0043204; C:GO:0043005; C:GO:0042995; P:GO:0006814; P:GO:0006979; C:GO:00…	F:calcium-release channel activity; F:sodium channel activity; C:neuronal cell body; P:regulation of filopodium assembly; F:ADP-ribose diphosphatase activity; F:calcium ion binding; P:cation transmembrane transport; P:release of sequestered calcium ion into cytosol; P:zinc II ion transmembrane transport; P:cellular response to purine-containing compound; P:estrous cycle; P:ion transmembrane trans…
AgB02_g018_t01	endothelin-converting enzyme 1	147	8	1.41095e-06	63.88	6	P:GO:0006508; C:GO:0016020; C:GO:0016021; F:GO:0004222; F:GO:0008237; F:GO:0016787	P:proteolysis; C:membrane; C:integral component of membrane; F:metalloendopeptidase activity; F:metallopeptidase activity; F:hydrolase activity
AgB02_g019_t02	phosphate-regulating neutral endopeptidase-like	257	20	9.54606e-26	48.65	24	P:GO:0019637; F:GO:0008270; P:GO:0030282; C:GO:0016529; F:GO:0004175; P:GO:0007267; P:GO:0006464; F:GO:0004177; C:GO:0005794; C:GO:0005783; F:GO:0008233; F:GO:0004222; C:GO:0005886; F:GO:0008237; C:GO:0005887; C:GO:0005615; P:GO:0001501; C:GO:0048471; F:GO:0046872; C:GO:0016020; P:GO:0006508; C:GO:0016021; F:GO:0016787; P:GO:0031214	P:organophosphate metabolic process; F:zinc ion binding; P:bone mineralization; C:sarcoplasmic reticulum; F:endopeptidase activity; P:cell-cell signaling; P:cellular protein modification process; F:aminopeptidase activity; C:Golgi apparatus; C:endoplasmic reticulum; F:peptidase activity; F:metalloendopeptidase activity; C:plasma membrane; F:metallopeptidase activity; C:integral component of plasm…
AgB02_g020_t01	hypothetical protein LOAG_10146	296	2	6.82874e-44	74.5
AgB02_g021_t02	---NA---	216
AgB02_g022_t01	---NA---	119
AgB02_g023_t01	---NA---	99
AgB02_g024_t02	Hypothetical protein ZK721.4	266	9	9.02224e-75	67.67	7	F:GO:0004930; F:GO:0001588; P:GO:0001963; P:GO:0007186; F:GO:0035240; C:GO:0016020; C:GO:0016021	F:G-protein coupled receptor activity; F:dopamine neurotransmitter receptor activity, coupled via Gs; P:synaptic transmission, dopaminergic; P:G-protein coupled receptor signaling pathway; F:dopamine binding; C:membrane; C:integral component of membrane
AgB02_g025_t01	Immunoglobulin I-set domain containing	199	20	2.29395e-103	53.5	11	F:GO:0000166; F:GO:0005524; C:GO:0055120; F:GO:0004672; C:GO:0005783; P:GO:0016310; F:GO:0016740; P:GO:0006468; F:GO:0016301; C:GO:0030017; F:GO:0004687	F:nucleotide binding; F:ATP binding; C:striated muscle dense body; F:protein kinase activity; C:endoplasmic reticulum; P:phosphorylation; F:transferase activity; P:protein phosphorylation; F:kinase activity; C:sarcomere; F:myosin light chain kinase activity
AgB02_g026_t02	cubilin (intrinsic factor-cobalamin receptor)	910	8	1.07786e-29	43.25
AgB02_g027_t04	ancient conserved domain	782	20	0	64.25	2	C:GO:0016020; C:GO:0016021	C:membrane; C:integral component of membrane
AgB02_g028_t01	Mannosyl-oligosaccharide glucosidase	90	20	1.87919e-33	80.2	11	C:GO:0005789; F:GO:0003824; P:GO:0008152; C:GO:0016020; C:GO:0016021; C:GO:0012505; P:GO:0006487; F:GO:0004573; P:GO:0009311; F:GO:0016787; F:GO:0016798	C:endoplasmic reticulum membrane; F:catalytic activity; P:metabolic process; C:membrane; C:integral component of membrane; C:endomembrane system; P:protein N-linked glycosylation; F:mannosyl-oligosaccharide glucosidase activity; P:oligosaccharide metabolic process; F:hydrolase activity; F:hydrolase activity, acting on glycosyl bonds
AgB02_g029_t01	Mannosyl-oligosaccharide glucosidase	791	20	0	60.6	12	C:GO:0005789; F:GO:0003824; P:GO:0040011; P:GO:0008152; C:GO:0016020; C:GO:0016021; P:GO:0006487; F:GO:0004573; C:GO:0005783; P:GO:0009311; F:GO:0016787; F:GO:0016798	C:endoplasmic reticulum membrane; F:catalytic activity; P:locomotion; P:metabolic process; C:membrane; C:integral component of membrane; P:protein N-linked glycosylation; F:mannosyl-oligosaccharide glucosidase activity; C:endoplasmic reticulum; P:oligosaccharide metabolic process; F:hydrolase activity; F:hydrolase activity, acting on glycosyl bonds
AgB02_g030_t01	---NA---	42
AgB02_g031_t01	Phosphatidylinositol-4-phosphate 3-kinase C2 domain-containing beta polypeptide	701	20	0	44.5	26	P:GO:0060100; P:GO:0019915; P:GO:0036092; P:GO:0046854; C:GO:0042995; C:GO:0001891; C:GO:0005942; C:GO:0032009; P:GO:0002119; C:GO:0031410; P:GO:0016310; P:GO:0090386; F:GO:0035091; C:GO:0005886; C:GO:0005622; P:GO:0048015; C:GO:0005737; C:GO:0016020; P:GO:0006629; P:GO:0006909; C:GO:0030670; C:GO:0031143; F:GO:0016740; F:GO:0016301; F:GO:0035005; F:GO:0016303	P:positive regulation of phagocytosis, engulfment; P:lipid storage; P:phosphatidylinositol-3-phosphate biosynthetic process; P:phosphatidylinositol phosphorylation; C:cell projection; C:phagocytic cup; C:phosphatidylinositol 3-kinase complex; C:early phagosome; P:nematode larval development; C:cytoplasmic vesicle; P:phosphorylation; P:phagosome maturation involved in apoptotic cell clearance; F:p…
AgB02_g032_t01	Phosphatidylinositol-4-phosphate 3-kinase C2 domain-containing subunit alpha	85	1	1.17308e-42	89	7	P:GO:0048015; F:GO:0035091; P:GO:0046854; P:GO:0016310; F:GO:0016740; F:GO:0016301; C:GO:0005622	P:phosphatidylinositol-mediated signaling; F:phosphatidylinositol binding; P:phosphatidylinositol phosphorylation; P:phosphorylation; F:transferase activity; F:kinase activity; C:intracellular
AgB02_g033_t06	elegans ly confirmed by transcript evidence	101	6	1.36653e-12	77.67	2	C:GO:0005856; P:GO:0000226	C:cytoskeleton; P:microtubule cytoskeleton organization
AgB02_g034_t01	DNA topoisomerase 2-alpha	313	13	8.51425e-44	48.69	3	C:GO:0016020; C:GO:0016021; F:GO:0016853	C:membrane; C:integral component of membrane; F:isomerase activity
AgB02_g035_t05	Mitochondrial dicarboxylate carrier	293	20	0	81.55	8	P:GO:0055085; F:GO:0003735; C:GO:0016020; C:GO:0016021; P:GO:0006810; F:GO:0005215; C:GO:0005622; P:GO:0006412	P:transmembrane transport; F:structural constituent of ribosome; C:membrane; C:integral component of membrane; P:transport; F:transporter activity; C:intracellular; P:translation
AgB02_g036_t01	---NA---	131
AgB02_g037_t04	Lipase maturation factor 2	445	20	2.05126e-146	58.55	4	C:GO:0005789; C:GO:0016020; C:GO:0016021; C:GO:0005783	C:endoplasmic reticulum membrane; C:membrane; C:integral component of membrane; C:endoplasmic reticulum
AgB02_g038_t01	---NA---	99
AgB02_g039_t03	c-1-tetrahydrofolate cytoplasmic	794	20	0	72.6	40	P:GO:0061053; P:GO:0006164; P:GO:0009396; P:GO:0046655; P:GO:0009257; P:GO:0009113; F:GO:0004487; F:GO:0004486; F:GO:0004488; F:GO:0000166; P:GO:0007507; F:GO:0005524; C:GO:0070062; P:GO:0001843; F:GO:0003824; F:GO:0016491; C:GO:0005829; P:GO:0035999; P:GO:0019346; P:GO:0009070; F:GO:0016874; P:GO:0009086; P:GO:0008152; P:GO:0048702; P:GO:0008652; P:GO:0009069; P:GO:0000105; P:GO:0001780; P:GO:00…	P:somite development; P:purine nucleotide biosynthetic process; P:folic acid-containing compound biosynthetic process; P:folic acid metabolic process; P:10-formyltetrahydrofolate biosynthetic process; P:purine nucleobase biosynthetic process; F:methylenetetrahydrofolate dehydrogenase (NAD+) activity; F:methylenetetrahydrofolate dehydrogenase [NAD(P)+] activity; F:methylenetetrahydrofolate dehydro…
AgB02_g040_t01	PAN domain	603	20	4.72834e-47	45.05	6	C:GO:0016020; C:GO:0016021; P:GO:0051260; P:GO:0022404; P:GO:0002064; P:GO:0042335	C:membrane; C:integral component of membrane; P:protein homooligomerization; P:molting cycle process; P:epithelial cell development; P:cuticle development
AgB02_g041_t01	estradiol 17-beta-dehydrogenase 12	322	20	0	66.5	23	F:GO:0102339; F:GO:0016509; F:GO:0008201; C:GO:0005783; P:GO:0006694; P:GO:0006633; C:GO:0005578; C:GO:0005789; P:GO:0006703; F:GO:0004303; F:GO:0005518; F:GO:0016491; C:GO:0005739; C:GO:0016020; P:GO:0006629; C:GO:0016021; F:GO:0001968; P:GO:0030198; F:GO:0102342; P:GO:0055114; P:GO:0010811; F:GO:0102341; F:GO:0102340	F:3-oxo-arachidoyl-CoA reductase activity; F:long-chain-3-hydroxyacyl-CoA dehydrogenase activity; F:heparin binding; C:endoplasmic reticulum; P:steroid biosynthetic process; P:fatty acid biosynthetic process; C:proteinaceous extracellular matrix; C:endoplasmic reticulum membrane; P:estrogen biosynthetic process; F:estradiol 17-beta-dehydrogenase activity; F:collagen binding; F:oxidoreductase acti…
AgB02_g042_t04	Poly(A)-specific ribonuclease PARN-like domain-containing 1	616	20	0	47.35	26	P:GO:0040011; F:GO:0043169; P:GO:0006402; C:GO:0005575; F:GO:0003674; F:GO:0004535; F:GO:0000166; F:GO:0003723; F:GO:0004518; P:GO:0034587; P:GO:0008150; P:GO:0090503; P:GO:0090305; F:GO:0003723; F:GO:0003676; C:GO:0005634; F:GO:0000175; F:GO:0046872; C:GO:0005737; F:GO:0004527; P:GO:0071025; C:GO:0043186; C:GO:0016020; C:GO:0016021; P:GO:0031047; F:GO:0016787	P:locomotion; F:cation binding; P:mRNA catabolic process; C:cellular_component; F:molecular_function; F:poly(A)-specific ribonuclease activity; F:nucleotide binding; F:RNA binding; F:nuclease activity; P:piRNA metabolic process; P:biological_process; P:RNA phosphodiester bond hydrolysis, exonucleolytic; P:nucleic acid phosphodiester bond hydrolysis; F:RNA binding; F:nucleic acid binding; C:nucleu…
AgB02_g043_t11	---NA---	1050
AgB02_g044_t01	---NA---	108
AgB02_g045_t01	Solute carrier organic anion transporter family member 4C1	699	20	0	56.25	16	P:GO:0007275; P:GO:0007283; P:GO:0006810; F:GO:0008514; C:GO:0005886; F:GO:0005215; C:GO:0005887; P:GO:0006811; C:GO:0070062; P:GO:0043252; C:GO:0016020; C:GO:0016021; P:GO:0030154; C:GO:0016323; P:GO:0015711; F:GO:0015347	P:multicellular organism development; P:spermatogenesis; P:transport; F:organic anion transmembrane transporter activity; C:plasma membrane; F:transporter activity; C:integral component of plasma membrane; P:ion transport; C:extracellular exosome; P:sodium-independent organic anion transport; C:membrane; C:integral component of membrane; P:cell differentiation; C:basolateral plasma membrane; P:or…
AgB02_g046_t01	---NA---	247
AgB02_g047_t02	---NA---	166
AgB02_g048_t05	Ets-1 p27	340	20	8.40625e-172	85.75	62	F:GO:0000978; F:GO:0000977; P:GO:0061614; P:GO:0007498; P:GO:0045765; P:GO:0006366; P:GO:0045648; P:GO:0045766; C:GO:0005667; F:GO:0001078; P:GO:0001666; P:GO:0006955; P:GO:0001501; P:GO:0045893; F:GO:0035035; P:GO:0044849; P:GO:0050728; P:GO:0050729; P:GO:0042981; F:GO:0000982; P:GO:0002376; C:GO:0005886; F:GO:0000981; P:GO:0021983; C:GO:0005634; F:GO:0005515; P:GO:0034616; P:GO:0001712; P:GO:00…	F:RNA polymerase II core promoter proximal region sequence-specific DNA binding; F:RNA polymerase II regulatory region sequence-specific DNA binding; P:pri-miRNA transcription from RNA polymerase II promoter; P:mesoderm development; P:regulation of angiogenesis; P:transcription from RNA polymerase II promoter; P:positive regulation of erythrocyte differentiation; P:positive regulation of angiogen…
AgB02_g049_t02	Type I inositol-1,4,5-trisphosphate 5-phosphatase	481	20	0	58.35	18	P:GO:0043647; P:GO:0007173; F:GO:0042731; P:GO:0048815; P:GO:0046855; C:GO:0005886; C:GO:0005622; F:GO:0004445; P:GO:0046856; F:GO:0005515; C:GO:0070062; P:GO:0048016; P:GO:0030728; C:GO:0016020; F:GO:0052658; F:GO:0052659; F:GO:0016787; F:GO:0052745	P:inositol phosphate metabolic process; P:epidermal growth factor receptor signaling pathway; F:PH domain binding; P:hermaphrodite genitalia morphogenesis; P:inositol phosphate dephosphorylation; C:plasma membrane; C:intracellular; F:inositol-polyphosphate 5-phosphatase activity; P:phosphatidylinositol dephosphorylation; F:protein binding; C:extracellular exosome; P:inositol phosphate-mediated si…
AgB02_g050_t01	Type I inositol-1,4,5-trisphosphate 5-phosphatase	99	1	7.7882e-29	100	2	P:GO:0046856; F:GO:0016787	P:phosphatidylinositol dephosphorylation; F:hydrolase activity
AgB02_g051_t11	Paired box Pax-6	294	20	1.96346e-172	76.75	19	P:GO:0007275; P:GO:0006351; P:GO:0009952; P:GO:0006355; P:GO:0007411; P:GO:0045138; F:GO:0043565; P:GO:0045944; P:GO:0040039; F:GO:0003677; C:GO:0005634; F:GO:0003700; F:GO:0005515; P:GO:0043053; C:GO:0005737; P:GO:0002119; P:GO:0048675; P:GO:0045165; P:GO:0030155	P:multicellular organism development; P:transcription, DNA-templated; P:anterior/posterior pattern specification; P:regulation of transcription, DNA-templated; P:axon guidance; P:nematode male tail tip morphogenesis; F:sequence-specific DNA binding; P:positive regulation of transcription from RNA polymerase II promoter; P:inductive cell migration; F:DNA binding; C:nucleus; F:transcription factor …
AgB02_g052_t02	---NA---	112
AgB02_g053_t02	---NA---	123
AgB02_g054_t02	GGL domain containing	64	20	4.21478e-40	78.7	17	P:GO:0035046; P:GO:0007186; P:GO:0007165; P:GO:0009792; P:GO:0007601; F:GO:0004871; P:GO:0007602; C:GO:0005886; P:GO:0000003; C:GO:0005834; P:GO:0010906; P:GO:0071244; C:GO:0005737; F:GO:0046982; C:GO:0016020; P:GO:0050896; C:GO:0016028	P:pronuclear migration; P:G-protein coupled receptor signaling pathway; P:signal transduction; P:embryo development ending in birth or egg hatching; P:visual perception; F:signal transducer activity; P:phototransduction; C:plasma membrane; P:reproduction; C:heterotrimeric G-protein complex; P:regulation of glucose metabolic process; P:cellular response to carbon dioxide; C:cytoplasm; F:protein he…
AgB02_g055_t01	---NA---	341
AgB02_g056_t01	---NA---	93
AgB02_g057_t01	---NA---	195
AgB02_g058_t01	---NA---	200
AgB02_g059_t01	elegans ly confirmed by transcript evidence	797	20	0	48.35	3	P:GO:0002119; C:GO:0016020; P:GO:0018996	P:nematode larval development; C:membrane; P:molting cycle, collagen and cuticulin-based cuticle
AgB02_g060_t01	---NA---	58
AgB02_g061_t01	TBC1 domain family member 16	785	20	0	64.9	11	C:GO:0005769; P:GO:0031338; F:GO:0005515; P:GO:0090630; F:GO:0005096; P:GO:1902017; C:GO:0005829; P:GO:0006886; F:GO:0017137; P:GO:0001919; P:GO:0001881	C:early endosome; P:regulation of vesicle fusion; F:protein binding; P:activation of GTPase activity; F:GTPase activator activity; P:regulation of cilium assembly; C:cytosol; P:intracellular protein transport; F:Rab GTPase binding; P:regulation of receptor recycling; P:receptor recycling
AgB02_g062_t01	Copine-5	648	20	0	63.5	9	C:GO:0005615; C:GO:0070062; P:GO:1903861; P:GO:0030154; C:GO:0043025; C:GO:0043204; C:GO:0043005; C:GO:0042995; F:GO:0003674	C:extracellular space; C:extracellular exosome; P:positive regulation of dendrite extension; P:cell differentiation; C:neuronal cell body; C:perikaryon; C:neuron projection; C:cell projection; F:molecular_function
AgB02_g063_t01	---NA---	114
AgB02_g064_t01	---NA---	104
AgB02_g065_t01	---NA---	105
AgB02_g066_t02	transmembrane cell surface Homolog family member (ttyh-1)	565	20	0	50.7	11	C:GO:0034707; P:GO:0006811; P:GO:1902476; C:GO:0016020; C:GO:0016021; F:GO:0005254; C:GO:0005576; P:GO:0006810; P:GO:0006821; F:GO:0052689; C:GO:0005886	C:chloride channel complex; P:ion transport; P:chloride transmembrane transport; C:membrane; C:integral component of membrane; F:chloride channel activity; C:extracellular region; P:transport; P:chloride transport; F:carboxylic ester hydrolase activity; C:plasma membrane
AgB02_g067_t02	hypothetical protein LOAG_07684	356	15	4.965e-54	48.33	2	C:GO:0016020; C:GO:0016021	C:membrane; C:integral component of membrane
AgB02_g068_t08	Leucine-rich repeat soc-2	454	20	0	77.35	13	P:GO:0040025; F:GO:0019903; P:GO:0046579; P:GO:0008543; F:GO:0008157; C:GO:0005654; P:GO:0007517; C:GO:0005634; C:GO:0000164; C:GO:0005737; P:GO:0002119; P:GO:0031344; F:GO:0017016	P:vulval development; F:protein phosphatase binding; P:positive regulation of Ras protein signal transduction; P:fibroblast growth factor receptor signaling pathway; F:protein phosphatase 1 binding; C:nucleoplasm; P:muscle organ development; C:nucleus; C:protein phosphatase type 1 complex; C:cytoplasm; P:nematode larval development; P:regulation of cell projection organization; F:Ras GTPase bindi…
AgB02_g069_t01	hypothetical protein LOAG_14429	145	1	4.04184e-08	66
AgB02_g070_t01	---NA---	120
AgB02_g071_t01	---NA---	153
AgB02_g072_t02	---NA---	69
AgB02_g073_t01	Ligand-Gated ion Channel family member (lgc-9)	161	10	4.49592e-49	57.9	15	P:GO:0007271; F:GO:0015464; P:GO:0007165; F:GO:0022848; P:GO:0034220; F:GO:0005230; F:GO:0042166; C:GO:0005892; P:GO:0006810; P:GO:0099565; P:GO:0006811; C:GO:0098794; C:GO:0016020; P:GO:0098655; C:GO:0016021	P:synaptic transmission, cholinergic; F:acetylcholine receptor activity; P:signal transduction; F:acetylcholine-gated cation-selective channel activity; P:ion transmembrane transport; F:extracellular ligand-gated ion channel activity; F:acetylcholine binding; C:acetylcholine-gated channel complex; P:transport; P:chemical synaptic transmission, postsynaptic; P:ion transport; C:postsynapse; C:membr…
AgB02_g074_t01	Ligand-Gated ion Channel family member (lgc-9)	130	10	3.60701e-22	57.8	15	P:GO:0007271; F:GO:0015464; P:GO:0007165; F:GO:0022848; P:GO:0034220; F:GO:0005230; F:GO:0042166; C:GO:0005892; P:GO:0006810; P:GO:0099565; P:GO:0006811; C:GO:0098794; C:GO:0016020; P:GO:0098655; C:GO:0016021	P:synaptic transmission, cholinergic; F:acetylcholine receptor activity; P:signal transduction; F:acetylcholine-gated cation-selective channel activity; P:ion transmembrane transport; F:extracellular ligand-gated ion channel activity; F:acetylcholine binding; C:acetylcholine-gated channel complex; P:transport; P:chemical synaptic transmission, postsynaptic; P:ion transport; C:postsynapse; C:membr…
AgB02_g075_t02	elegans ly confirmed by transcript evidence	528	20	4.96561e-127	53.1	9	F:GO:0004930; P:GO:0007186; P:GO:0007165; C:GO:0016020; C:GO:0016021; F:GO:0004871; C:GO:0005886; P:GO:0038170; F:GO:0004994	F:G-protein coupled receptor activity; P:G-protein coupled receptor signaling pathway; P:signal transduction; C:membrane; C:integral component of membrane; F:signal transducer activity; C:plasma membrane; P:somatostatin signaling pathway; F:somatostatin receptor activity
AgB02_g076_t01	---NA---	76
AgB02_g077_t01	---NA---	142
AgB02_g078_t01	---NA---	106
AgB02_g079_t04	uncharacterized glycosyltransferase AER61-like	298	20	0	72.25	7	C:GO:0005788; F:GO:0016757; P:GO:0006493; P:GO:0008152; F:GO:0016262; C:GO:0005783; F:GO:0016740	C:endoplasmic reticulum lumen; F:transferase activity, transferring glycosyl groups; P:protein O-linked glycosylation; P:metabolic process; F:protein N-acetylglucosaminyltransferase activity; C:endoplasmic reticulum; F:transferase activity
AgB02_g080_t02	elegans confirmed by transcript evidence	249	7	1.86426e-93	57.71	2	C:GO:0016020; C:GO:0016021	C:membrane; C:integral component of membrane
AgB02_g081_t01	---NA---	177
AgB02_g082_t01	---NA---	187
AgB02_g083_t01	---NA---	113
AgB02_g084_t02	Myotubularin-related family	897	20	0	51.3	3	F:GO:0046872; P:GO:0035556; C:GO:0005622	F:metal ion binding; P:intracellular signal transduction; C:intracellular
AgB02_g085_t01	aminoglycoside phosphotransferase	419	20	8.49689e-83	45.15	6	F:GO:0005524; P:GO:0040011; P:GO:0045087; C:GO:0016020; C:GO:0016021; F:GO:0016740	F:ATP binding; P:locomotion; P:innate immune response; C:membrane; C:integral component of membrane; F:transferase activity
AgB02_g086_t05	Ras association domain family 1 isoform A	242	20	0	63.35	28	P:GO:0007050; C:GO:0015630; P:GO:0070507; P:GO:0006468; C:GO:0005874; P:GO:0071157; P:GO:0031398; P:GO:0035556; F:GO:0008270; F:GO:0042802; P:GO:0007165; C:GO:0000922; P:GO:0007265; P:GO:0006974; P:GO:0007049; C:GO:0005622; C:GO:0005886; F:GO:0004697; C:GO:0005634; C:GO:0005856; F:GO:0005515; C:GO:0005815; F:GO:0046872; C:GO:0005737; F:GO:0047485; C:GO:0005819; F:GO:0016740; P:GO:0050821	P:cell cycle arrest; C:microtubule cytoskeleton; P:regulation of microtubule cytoskeleton organization; P:protein phosphorylation; C:microtubule; P:negative regulation of cell cycle arrest; P:positive regulation of protein ubiquitination; P:intracellular signal transduction; F:zinc ion binding; F:identical protein binding; P:signal transduction; C:spindle pole; P:Ras protein signal transduction; …
AgB02_g087_t01	---NA---	129
AgB02_g088_t01	vesicular acetylcholine transporter unc-17	533	20	0	72.1	31	P:GO:0007271; F:GO:0016746; P:GO:0015893; P:GO:0040012; P:GO:0015870; P:GO:0040011; C:GO:0008021; P:GO:0007411; F:GO:0005277; C:GO:0045202; C:GO:0043005; P:GO:0006836; C:GO:0005887; P:GO:0006855; P:GO:0043051; P:GO:0072488; P:GO:0002119; P:GO:0006937; C:GO:0031410; C:GO:0030285; P:GO:0046928; P:GO:0055085; C:GO:0060076; P:GO:0006810; C:GO:0031090; C:GO:0016020; C:GO:0016021; C:GO:0030054; C:GO:00…	P:synaptic transmission, cholinergic; F:transferase activity, transferring acyl groups; P:drug transport; P:regulation of locomotion; P:acetylcholine transport; P:locomotion; C:synaptic vesicle; P:axon guidance; F:acetylcholine transmembrane transporter activity; C:synapse; C:neuron projection; P:neurotransmitter transport; C:integral component of plasma membrane; P:drug transmembrane transport; …
AgB02_g089_t01	---NA---	102
AgB02_g090_t01	gonadotropin-releasing hormone receptor 2	219	20	2.80149e-114	62.75	15	P:GO:1904066; P:GO:0007186; P:GO:0007165; P:GO:0040011; P:GO:0007200; F:GO:0004871; C:GO:0005886; F:GO:0004930; C:GO:0005887; F:GO:0008528; P:GO:0007218; P:GO:0002119; F:GO:0046982; C:GO:0016020; C:GO:0016021	P:G-protein coupled receptor signaling pathway involved in dauer larval development; P:G-protein coupled receptor signaling pathway; P:signal transduction; P:locomotion; P:phospholipase C-activating G-protein coupled receptor signaling pathway; F:signal transducer activity; C:plasma membrane; F:G-protein coupled receptor activity; C:integral component of plasma membrane; F:G-protein coupled pepti…
AgB02_g091_t09	EPS (human endocytosis) related family member (eps-8)	751	20	0	69.9	22	P:GO:0040027; P:GO:0040026; P:GO:0040011; P:GO:0009792; P:GO:0048546; P:GO:0045109; P:GO:0006898; P:GO:0000003; F:GO:0051015; P:GO:0051016; P:GO:0045185; F:GO:0005515; C:GO:0005903; C:GO:0045177; P:GO:0002119; P:GO:0048730; P:GO:0048598; C:GO:0030056; P:GO:0016310; F:GO:0008092; F:GO:0016301; P:GO:0051017	P:negative regulation of vulval development; P:positive regulation of vulval development; P:locomotion; P:embryo development ending in birth or egg hatching; P:digestive tract morphogenesis; P:intermediate filament organization; P:receptor-mediated endocytosis; P:reproduction; F:actin filament binding; P:barbed-end actin filament capping; P:maintenance of protein location; F:protein binding; C:br…
AgB02_g092_t01	---NA---	154
AgB02_g093_t01	---NA---	105
AgB02_g094_t05	elegans confirmed by transcript evidence	141	5	4.70874e-07	51.8	2	C:GO:0016020; C:GO:0016021	C:membrane; C:integral component of membrane
AgB02_g095_t01	phosphatase 1H	516	20	0	62.7	11	F:GO:0004722; F:GO:0004721; C:GO:0005634; C:GO:0005737; F:GO:0003824; F:GO:0046872; P:GO:0006470; C:GO:0016020; C:GO:0016021; F:GO:0043169; F:GO:0016787	F:protein serine/threonine phosphatase activity; F:phosphoprotein phosphatase activity; C:nucleus; C:cytoplasm; F:catalytic activity; F:metal ion binding; P:protein dephosphorylation; C:membrane; C:integral component of membrane; F:cation binding; F:hydrolase activity
AgB02_g096_t01	cuticlin 1	435	20	1.8882e-154	75.75	6	C:GO:0060102; P:GO:0010171; C:GO:0016020; C:GO:0016021; C:GO:0005576; F:GO:0042302	C:collagen and cuticulin-based cuticle extracellular matrix; P:body morphogenesis; C:membrane; C:integral component of membrane; C:extracellular region; F:structural constituent of cuticle
AgB02_g097_t03	Neurotransmitter-gated ion-channel ligand binding domain containing	309	20	0	59.15	23	P:GO:0007271; F:GO:0015464; P:GO:0007274; P:GO:0007165; F:GO:0022848; P:GO:0034220; F:GO:0005230; F:GO:0042166; C:GO:0005892; C:GO:0045202; P:GO:0035094; P:GO:0006810; C:GO:0005886; P:GO:0000003; P:GO:0099565; F:GO:0005216; P:GO:0006811; C:GO:0098794; C:GO:0045211; P:GO:0098655; C:GO:0016020; C:GO:0016021; C:GO:0030054	P:synaptic transmission, cholinergic; F:acetylcholine receptor activity; P:neuromuscular synaptic transmission; P:signal transduction; F:acetylcholine-gated cation-selective channel activity; P:ion transmembrane transport; F:extracellular ligand-gated ion channel activity; F:acetylcholine binding; C:acetylcholine-gated channel complex; C:synapse; P:response to nicotine; P:transport; C:plasma memb…
AgB02_g098_t02	elegans ly confirmed by transcript evidence	158	20	2.53565e-10	46.35	11	P:GO:0006979; F:GO:0042329; P:GO:0071470; P:GO:0009650; C:GO:0005581; C:GO:0016020; C:GO:0016021; F:GO:0005201; F:GO:0042302; C:GO:0005578; C:GO:0071944	P:response to oxidative stress; F:structural constituent of collagen and cuticulin-based cuticle; P:cellular response to osmotic stress; P:UV protection; C:collagen trimer; C:membrane; C:integral component of membrane; F:extracellular matrix structural constituent; F:structural constituent of cuticle; C:proteinaceous extracellular matrix; C:cell periphery
AgB02_g099_t01	Lung seven transmembrane receptor family	158	9	3.92036e-108	67.89	2	C:GO:0016020; C:GO:0016021	C:membrane; C:integral component of membrane
AgB02_g100_t01	Calcium calmodulin-dependent kinase kinase 2	92	1	6.13766e-51	100	2	P:GO:0016310; F:GO:0016301	P:phosphorylation; F:kinase activity
AgB02_g101_t01	---NA---	124
AgB02_g102_t01	Sensory AXon guidance family member (sax-7)	1339	20	0	61.15	46	C:GO:0032590; C:GO:0016328; P:GO:0045924; P:GO:0008045; P:GO:0007173; P:GO:0009792; F:GO:0050839; P:GO:0048812; P:GO:0008049; P:GO:0007158; C:GO:0032809; P:GO:0008366; P:GO:0006468; P:GO:0048813; F:GO:0050254; P:GO:0021682; F:GO:0030506; P:GO:0007409; F:GO:0005509; P:GO:0035011; P:GO:0061343; P:GO:0008050; P:GO:0007560; P:GO:0016319; P:GO:0050808; P:GO:0035151; C:GO:0035230; P:GO:0003384; P:GO:00…	C:dendrite membrane; C:lateral plasma membrane; P:regulation of female receptivity; P:motor neuron axon guidance; P:epidermal growth factor receptor signaling pathway; P:embryo development ending in birth or egg hatching; F:cell adhesion molecule binding; P:neuron projection morphogenesis; P:male courtship behavior; P:neuron cell-cell adhesion; C:neuronal cell body membrane; P:axon ensheathment; …
AgB02_g103_t01	---NA---	79
AgB02_g104_t01	endonuclease-reverse transcriptase	171	20	2.22659e-21	68.8	4	P:GO:0090305; F:GO:0003964; F:GO:0004519; P:GO:0006278	P:nucleic acid phosphodiester bond hydrolysis; F:RNA-directed DNA polymerase activity; F:endonuclease activity; P:RNA-dependent DNA biosynthetic process
AgB02_g105_t01	---NA---	163
AgB02_g106_t01	von Willebrand factor type A domain containing	301	20	0	62.55	1	C:GO:0005581	C:collagen trimer
AgB02_g107_t01	---NA---	87
AgB02_g108_t02	elegans ly confirmed by transcript evidence	150	5	3.53344e-14	51.2	3	C:GO:0016020; C:GO:0016021; P:GO:0042128	C:membrane; C:integral component of membrane; P:nitrate assimilation
AgB02_g109_t03	elegans ly confirmed by transcript evidence	241	20	2.24939e-23	50.25	4	F:GO:0004930; P:GO:0007186; C:GO:0016020; C:GO:0016021	F:G-protein coupled receptor activity; P:G-protein coupled receptor signaling pathway; C:membrane; C:integral component of membrane
AgB02_g110_t01	---NA---	188
AgB02_g111_t01	---NA---	118
AgB02_g112_t02	HIV-1 Vpr binding	1652	20	0	58.65	21	P:GO:0033151; P:GO:0035212; P:GO:0030183; P:GO:0006351; P:GO:0006355; F:GO:0004674; C:GO:0005730; P:GO:0000122; F:GO:0000166; F:GO:1990244; C:GO:0005634; F:GO:0005524; P:GO:1990245; F:GO:0005515; C:GO:0005737; P:GO:0016032; P:GO:0016310; F:GO:0016740; C:GO:0008180; F:GO:0016301; P:GO:0016567	P:V(D)J recombination; P:cell competition in a multicellular organism; P:B cell differentiation; P:transcription, DNA-templated; P:regulation of transcription, DNA-templated; F:protein serine/threonine kinase activity; C:nucleolus; P:negative regulation of transcription from RNA polymerase II promoter; F:nucleotide binding; F:histone kinase activity (H2A-T120 specific); C:nucleus; F:ATP binding; …
AgB02_g113_t08	WASH complex subunit FAM21A-like	389	20	0	48.2	10	C:GO:0031901; C:GO:0005769; C:GO:0005768; C:GO:0016020; P:GO:0015031; C:GO:0005829; C:GO:0071203; P:GO:0042147; P:GO:0006810; C:GO:0005886	C:early endosome membrane; C:early endosome; C:endosome; C:membrane; P:protein transport; C:cytosol; C:WASH complex; P:retrograde transport, endosome to Golgi; P:transport; C:plasma membrane
AgB02_g114_t07	Dual specificity mitogen-activated kinase kinase 4	366	20	0	70.9	25	P:GO:0018108; P:GO:0009611; P:GO:0038095; P:GO:0007254; P:GO:0006468; F:GO:0000166; F:GO:0005524; P:GO:0000165; F:GO:0004713; P:GO:0048263; P:GO:0006915; C:GO:0005829; P:GO:0016310; P:GO:2000672; P:GO:0035897; P:GO:0007165; F:GO:0004672; F:GO:0004674; C:GO:0005634; F:GO:0004702; P:GO:0071260; F:GO:0005515; C:GO:0005737; F:GO:0016740; F:GO:0016301	P:peptidyl-tyrosine phosphorylation; P:response to wounding; P:Fc-epsilon receptor signaling pathway; P:JNK cascade; P:protein phosphorylation; F:nucleotide binding; F:ATP binding; P:MAPK cascade; F:protein tyrosine kinase activity; P:determination of dorsal identity; P:apoptotic process; C:cytosol; P:phosphorylation; P:negative regulation of motor neuron apoptotic process; P:proteolysis in other…
AgB02_g115_t03	patatin family	726	20	0	56.85	18	P:GO:0019915; P:GO:0055088; P:GO:0008340; P:GO:0008152; P:GO:0006642; C:GO:0005886; C:GO:0005811; C:GO:0005737; P:GO:0016042; P:GO:0006629; C:GO:0016020; C:GO:0016021; F:GO:0004806; C:GO:0005829; P:GO:0030431; P:GO:0019433; P:GO:0010884; F:GO:0016787	P:lipid storage; P:lipid homeostasis; P:determination of adult lifespan; P:metabolic process; P:triglyceride mobilization; C:plasma membrane; C:lipid particle; C:cytoplasm; P:lipid catabolic process; P:lipid metabolic process; C:membrane; C:integral component of membrane; F:triglyceride lipase activity; C:cytosol; P:sleep; P:triglyceride catabolic process; P:positive regulation of lipid storage; …
AgB02_g116_t03	---NA---	88
AgB02_g117_t02	---NA---	208
AgB02_g118_t02	SERotonin octopamine receptor family member (ser-2)	451	20	0	70.85	15	P:GO:0018108; P:GO:0007186; P:GO:0007165; P:GO:0007212; P:GO:0007211; F:GO:0004871; C:GO:0005886; F:GO:0008226; F:GO:0004930; C:GO:0005887; F:GO:0004715; F:GO:0004989; C:GO:0016020; C:GO:0016021; F:GO:0016740	P:peptidyl-tyrosine phosphorylation; P:G-protein coupled receptor signaling pathway; P:signal transduction; P:dopamine receptor signaling pathway; P:octopamine or tyramine signaling pathway; F:signal transducer activity; C:plasma membrane; F:tyramine receptor activity; F:G-protein coupled receptor activity; C:integral component of plasma membrane; F:non-membrane spanning protein tyrosine kinase a…
AgB02_g119_t01	---NA---	34
AgB02_g120_t03	elegans ly confirmed by transcript evidence	814	20	0	48.9	4	P:GO:0007093; C:GO:1990423; C:GO:0016020; C:GO:0016021	P:mitotic cell cycle checkpoint; C:RZZ complex; C:membrane; C:integral component of membrane
AgB02_g121_t03	---NA---	116
AgB02_g122_t01	phosphatidylinositol kinase	613	20	0	67.3	13	P:GO:0007032; P:GO:0032252; P:GO:0033363; P:GO:0007030; P:GO:0009792; P:GO:0046854; F:GO:0004430; C:GO:0005886; C:GO:0031902; C:GO:0005802; P:GO:0016310; P:GO:0033365; F:GO:0016301	P:endosome organization; P:secretory granule localization; P:secretory granule organization; P:Golgi organization; P:embryo development ending in birth or egg hatching; P:phosphatidylinositol phosphorylation; F:1-phosphatidylinositol 4-kinase activity; C:plasma membrane; C:late endosome membrane; C:trans-Golgi network; P:phosphorylation; P:protein localization to organelle; F:kinase activity
AgB02_g123_t04	227 kDa spindle- and centromere-associated	2196	20	0	65.85	15	P:GO:0009792; P:GO:0007067; C:GO:0000777; C:GO:0005694; C:GO:0000776; C:GO:0000775; P:GO:0007049; P:GO:0051301; C:GO:0005634; P:GO:0051321; C:GO:0005856; C:GO:0005815; C:GO:0005737; C:GO:0005828; C:GO:0005819	P:embryo development ending in birth or egg hatching; P:mitotic nuclear division; C:condensed chromosome kinetochore; C:chromosome; C:kinetochore; C:chromosome, centromeric region; P:cell cycle; P:cell division; C:nucleus; P:meiotic cell cycle; C:cytoskeleton; C:microtubule organizing center; C:cytoplasm; C:kinetochore microtubule; C:spindle
AgB02_g124_t06	Zinc metallo ase nas-33	352	20	0	66.65	9	F:GO:0008270; F:GO:0046872; P:GO:0006508; F:GO:0008233; P:GO:0018996; C:GO:0005576; F:GO:0004222; F:GO:0008237; F:GO:0016787	F:zinc ion binding; F:metal ion binding; P:proteolysis; F:peptidase activity; P:molting cycle, collagen and cuticulin-based cuticle; C:extracellular region; F:metalloendopeptidase activity; F:metallopeptidase activity; F:hydrolase activity
AgB02_g125_t01	HAM-2	509	20	0	59.6	9	F:GO:0003676; F:GO:0003677; C:GO:0005634; F:GO:0003700; F:GO:0046872; P:GO:0006355; P:GO:0045664; P:GO:0016477; P:GO:0001709	F:nucleic acid binding; F:DNA binding; C:nucleus; F:transcription factor activity, sequence-specific DNA binding; F:metal ion binding; P:regulation of transcription, DNA-templated; P:regulation of neuron differentiation; P:cell migration; P:cell fate determination
AgB02_g126_t01	---NA---	131
AgB02_g127_t02	---NA---	145
AgB02_g128_t03	neuralized	637	20	0	66	4	F:GO:0008270; F:GO:0046872; P:GO:0009792; P:GO:0000003	F:zinc ion binding; F:metal ion binding; P:embryo development ending in birth or egg hatching; P:reproduction
AgB02_g129_t01	---NA---	100
AgB02_g130_t01	Choline ethanolamine kinase	412	20	0	69.75	29	P:GO:0007275; F:GO:0004103; F:GO:0000166; C:GO:0005887; F:GO:0005524; P:GO:0006657; P:GO:0016310; F:GO:0005080; F:GO:0019904; P:GO:0008654; P:GO:0007169; F:GO:0005068; P:GO:0006656; P:GO:0006612; P:GO:0006646; C:GO:0005856; F:GO:0005515; F:GO:0004305; F:GO:0046872; C:GO:0005737; C:GO:0005938; C:GO:0016020; P:GO:0006629; P:GO:0015914; F:GO:0016740; C:GO:0016323; F:GO:0016301; P:GO:0032456; F:GO:00…	P:multicellular organism development; F:choline kinase activity; F:nucleotide binding; C:integral component of plasma membrane; F:ATP binding; P:CDP-choline pathway; P:phosphorylation; F:protein kinase C binding; F:protein domain specific binding; P:phospholipid biosynthetic process; P:transmembrane receptor protein tyrosine kinase signaling pathway; F:transmembrane receptor protein tyrosine kina…
AgB02_g131_t06	39S ribosomal mitochondrial	171	20	1.95434e-109	68.4	17	P:GO:0008340; P:GO:0009792; P:GO:0010171; C:GO:0005761; F:GO:0008234; F:GO:0008233; C:GO:0005840; C:GO:0005762; P:GO:0000003; C:GO:0005622; P:GO:0006412; F:GO:0003735; P:GO:0002119; P:GO:0048477; P:GO:0006508; P:GO:0032543; F:GO:0016787	P:determination of adult lifespan; P:embryo development ending in birth or egg hatching; P:body morphogenesis; C:mitochondrial ribosome; F:cysteine-type peptidase activity; F:peptidase activity; C:ribosome; C:mitochondrial large ribosomal subunit; P:reproduction; C:intracellular; P:translation; F:structural constituent of ribosome; P:nematode larval development; P:oogenesis; P:proteolysis; P:mito…
AgB02_g132_t04	H+-ATPase V-type subunit	161	20	5.10739e-89	77.8	29	P:GO:0040035; P:GO:0015992; P:GO:0015991; F:GO:0015078; P:GO:0040011; P:GO:0009792; P:GO:0043068; C:GO:0005774; C:GO:0005773; C:GO:0005575; P:GO:0040018; F:GO:0003674; C:GO:0000220; P:GO:0006811; P:GO:0070265; P:GO:0002119; C:GO:0033179; P:GO:0018996; P:GO:0008150; C:GO:0033177; P:GO:0007042; F:GO:0046961; P:GO:0006810; P:GO:0006898; P:GO:0000003; C:GO:0016020; C:GO:0016021; P:GO:0010940; P:GO:00…	P:hermaphrodite genitalia development; P:proton transport; P:ATP hydrolysis coupled proton transport; F:hydrogen ion transmembrane transporter activity; P:locomotion; P:embryo development ending in birth or egg hatching; P:positive regulation of programmed cell death; C:vacuolar membrane; C:vacuole; C:cellular_component; P:positive regulation of multicellular organism growth; F:molecular_function…
AgB02_g133_t01	Serine threonine- kinase ULK3	432	20	0	65.2	17	C:GO:0000407; P:GO:0090398; P:GO:0046777; F:GO:0004672; F:GO:0004674; P:GO:0006468; P:GO:0045879; F:GO:0000166; F:GO:0005524; C:GO:0097542; F:GO:0005515; C:GO:0005737; P:GO:0006914; P:GO:0045880; P:GO:0016310; F:GO:0016740; F:GO:0016301	C:pre-autophagosomal structure; P:cellular senescence; P:protein autophosphorylation; F:protein kinase activity; F:protein serine/threonine kinase activity; P:protein phosphorylation; P:negative regulation of smoothened signaling pathway; F:nucleotide binding; F:ATP binding; C:ciliary tip; F:protein binding; C:cytoplasm; P:autophagy; P:positive regulation of smoothened signaling pathway; P:phosph…
AgB02_g134_t02	---NA---	115
AgB02_g135_t02	---NA---	112
AgB02_g136_t01	ectonucleoside triphosphate diphosphohydrolase 7	262	20	1.90916e-170	66.75	26	P:GO:0007275; P:GO:0035262; F:GO:0004382; C:GO:0030173; C:GO:0000139; C:GO:0005794; P:GO:0046712; P:GO:0007506; F:GO:0045134; C:GO:0031410; P:GO:0060050; P:GO:0009191; P:GO:0006256; P:GO:0009203; P:GO:0046032; C:GO:0005634; F:GO:0043262; F:GO:0046872; C:GO:0005737; C:GO:0016020; C:GO:0016021; F:GO:0017110; P:GO:0030154; F:GO:0017111; P:GO:0030334; F:GO:0016787	P:multicellular organism development; P:gonad morphogenesis; F:guanosine-diphosphatase activity; C:integral component of Golgi membrane; C:Golgi membrane; C:Golgi apparatus; P:GDP catabolic process; P:gonadal mesoderm development; F:uridine-diphosphatase activity; C:cytoplasmic vesicle; P:positive regulation of protein glycosylation; P:ribonucleoside diphosphate catabolic process; P:UDP catabolic…
AgB02_g137_t01	---NA---	108
AgB02_g138_t01	---NA---	98
AgB02_g139_t01	Small heat shock OV25-1	68	7	2.02188e-45	80.86
AgB02_g140_t03	Transmembrane emp24 transport domain containing 5	275	20	7.03009e-164	57.8	13	P:GO:0015031; C:GO:0005783; C:GO:0005794; C:GO:0005793; P:GO:0090161; P:GO:0006810; F:GO:0003674; C:GO:0005789; C:GO:0005801; C:GO:0016020; C:GO:0016021; C:GO:0070971; C:GO:0033116	P:protein transport; C:endoplasmic reticulum; C:Golgi apparatus; C:endoplasmic reticulum-Golgi intermediate compartment; P:Golgi ribbon formation; P:transport; F:molecular_function; C:endoplasmic reticulum membrane; C:cis-Golgi network; C:membrane; C:integral component of membrane; C:endoplasmic reticulum exit site; C:endoplasmic reticulum-Golgi intermediate compartment membrane
AgB02_g141_t01	---NA---	98
AgB02_g142_t01	---NA---	104
AgB02_g143_t04	CMGC CDK kinase	303	20	0	61.7	18	P:GO:0060271; F:GO:0008353; P:GO:0007275; F:GO:0004672; F:GO:0004693; F:GO:0004674; P:GO:0006468; C:GO:0042995; P:GO:0007049; F:GO:0000166; P:GO:0051301; F:GO:0005524; C:GO:0005634; C:GO:0005737; C:GO:0005929; P:GO:0016310; F:GO:0016740; F:GO:0016301	P:cilium assembly; F:RNA polymerase II carboxy-terminal domain kinase activity; P:multicellular organism development; F:protein kinase activity; F:cyclin-dependent protein serine/threonine kinase activity; F:protein serine/threonine kinase activity; P:protein phosphorylation; C:cell projection; P:cell cycle; F:nucleotide binding; P:cell division; F:ATP binding; C:nucleus; C:cytoplasm; C:cilium; P…
AgB02_g144_t01	G -coupled receptor	143	20	4.6516e-49	61.1	10	F:GO:0004930; F:GO:0008528; P:GO:0007186; P:GO:0007165; C:GO:0016020; C:GO:0016021; C:GO:0005576; F:GO:0004871; F:GO:0005179; C:GO:0005886	F:G-protein coupled receptor activity; F:G-protein coupled peptide receptor activity; P:G-protein coupled receptor signaling pathway; P:signal transduction; C:membrane; C:integral component of membrane; C:extracellular region; F:signal transducer activity; F:hormone activity; C:plasma membrane
AgB02_g145_t01	G -coupled receptor	207	20	7.21707e-68	54.45	9	F:GO:0004930; F:GO:0008528; P:GO:0007186; P:GO:0007165; C:GO:0016020; C:GO:0016021; C:GO:0005576; F:GO:0004871; F:GO:0005179	F:G-protein coupled receptor activity; F:G-protein coupled peptide receptor activity; P:G-protein coupled receptor signaling pathway; P:signal transduction; C:membrane; C:integral component of membrane; C:extracellular region; F:signal transducer activity; F:hormone activity
AgB02_g146_t03	---NA---	29
AgB02_g147_t01	elegans ly confirmed by transcript evidence	2347	20	0	58.45	4	F:GO:0008381; P:GO:0034220; C:GO:0016020; C:GO:0016021	F:mechanically-gated ion channel activity; P:ion transmembrane transport; C:membrane; C:integral component of membrane
AgB02_g148_t01	---NA---	109
AgB02_g149_t01	vesicle-associated membrane 8	105	20	5.22665e-28	70.4	38	P:GO:0046718; P:GO:0043308; P:GO:0015031; P:GO:0006887; C:GO:0030667; C:GO:0005769; C:GO:0005768; C:GO:0070062; P:GO:0016192; P:GO:0006914; C:GO:0005829; C:GO:0035577; P:GO:1903076; F:GO:0019869; P:GO:1903531; P:GO:1903595; F:GO:0005484; P:GO:0043312; P:GO:0006892; F:GO:0000149; P:GO:0006810; C:GO:0098594; C:GO:0005765; C:GO:0005886; C:GO:0005764; C:GO:0031901; C:GO:0031902; P:GO:0097352; C:GO:00…	P:viral entry into host cell; P:eosinophil degranulation; P:protein transport; P:exocytosis; C:secretory granule membrane; C:early endosome; C:endosome; C:extracellular exosome; P:vesicle-mediated transport; P:autophagy; C:cytosol; C:azurophil granule membrane; P:regulation of protein localization to plasma membrane; F:chloride channel inhibitor activity; P:negative regulation of secretion by cel…
AgB02_g150_t01	Bifunctional aminoacyl-tRNA synthetase	1798	20	0	62.1	30	P:GO:0009792; P:GO:0006424; P:GO:0006425; F:GO:0000166; P:GO:0006418; F:GO:0005524; F:GO:0004812; F:GO:0003723; F:GO:0003824; P:GO:0002119; F:GO:0004818; C:GO:0005829; C:GO:0017101; F:GO:0004819; F:GO:0016874; F:GO:0016876; P:GO:0008033; P:GO:0043039; P:GO:0006433; P:GO:0006412; F:GO:0017150; P:GO:0002943; C:GO:0005737; F:GO:0050660; F:GO:0004827; C:GO:0016020; C:GO:0005739; C:GO:0016021; P:GO:00…	P:embryo development ending in birth or egg hatching; P:glutamyl-tRNA aminoacylation; P:glutaminyl-tRNA aminoacylation; F:nucleotide binding; P:tRNA aminoacylation for protein translation; F:ATP binding; F:aminoacyl-tRNA ligase activity; F:RNA binding; F:catalytic activity; P:nematode larval development; F:glutamate-tRNA ligase activity; C:cytosol; C:aminoacyl-tRNA synthetase multienzyme complex;…
AgB02_g151_t02	serine threonine- kinase mitochondrial	559	20	0	52.55	97	P:GO:0002082; P:GO:0007411; P:GO:0051091; P:GO:0051881; P:GO:0051402; P:GO:0035556; C:GO:0030424; P:GO:0033138; P:GO:0016239; P:GO:0060872; F:GO:0004672; F:GO:0004674; C:GO:0005634; C:GO:0005758; P:GO:1902958; F:GO:0031625; F:GO:0046872; C:GO:0044297; P:GO:0016242; P:GO:0035307; P:GO:0010821; P:GO:0034976; P:GO:1903384; P:GO:1903147; P:GO:0022904; P:GO:0043123; P:GO:0043523; P:GO:0043524; F:GO:00…	P:regulation of oxidative phosphorylation; P:axon guidance; P:positive regulation of sequence-specific DNA binding transcription factor activity; P:regulation of mitochondrial membrane potential; P:neuron apoptotic process; P:intracellular signal transduction; C:axon; P:positive regulation of peptidyl-serine phosphorylation; P:positive regulation of macroautophagy; P:semicircular canal developmen…
AgB02_g152_t01	---NA---	164
AgB02_g153_t01	cytochrome P450 4V2-like	396	20	1.16825e-156	66.3	18	F:GO:0016705; C:GO:0005783; P:GO:0007601; F:GO:0004497; F:GO:0020037; C:GO:0005789; P:GO:0001523; F:GO:0005506; F:GO:0016491; F:GO:0046872; C:GO:0016020; P:GO:0006629; C:GO:0016021; P:GO:0055114; P:GO:0016125; P:GO:0010430; P:GO:0050896; P:GO:0050830	F:oxidoreductase activity, acting on paired donors, with incorporation or reduction of molecular oxygen; C:endoplasmic reticulum; P:visual perception; F:monooxygenase activity; F:heme binding; C:endoplasmic reticulum membrane; P:retinoid metabolic process; F:iron ion binding; F:oxidoreductase activity; F:metal ion binding; C:membrane; P:lipid metabolic process; C:integral component of membrane; P…
AgB02_g154_t01	chloride intracellular channel 2	253	20	0	57.4	44	P:GO:0060088; P:GO:0010880; F:GO:0015035; C:GO:0036195; P:GO:1902476; F:GO:0009055; P:GO:0008104; C:GO:0000139; C:GO:0005794; F:GO:0004364; F:GO:0005254; P:GO:0002021; P:GO:0006821; P:GO:0002024; C:GO:0034707; P:GO:0007605; P:GO:0006811; C:GO:0070062; P:GO:0034765; C:GO:0015629; C:GO:0032421; C:GO:0032420; C:GO:0055120; F:GO:0005244; C:GO:0005783; P:GO:0045454; P:GO:0006810; C:GO:0005765; C:GO:00…	P:auditory receptor cell stereocilium organization; P:regulation of release of sequestered calcium ion into cytosol by sarcoplasmic reticulum; F:protein disulfide oxidoreductase activity; C:muscle cell projection membrane; P:chloride transmembrane transport; F:electron carrier activity; P:protein localization; C:Golgi membrane; C:Golgi apparatus; F:glutathione transferase activity; F:chloride cha…
AgB02_g155_t08	---NA---	187
AgB02_g156_t02	hypothetical protein LOAG_02470	526	6	1.20589e-50	49.33
AgB02_g157_t03	---NA---	82
AgB02_g158_t01	---NA---	72
AgB02_g159_t01	elegans confirmed by transcript evidence	481	20	0	66.7	16	P:GO:0071805; P:GO:0055085; C:GO:0008076; F:GO:0005251; P:GO:0051260; F:GO:0005244; F:GO:0005267; P:GO:0006810; C:GO:0005886; P:GO:0006813; F:GO:0005249; F:GO:0005216; P:GO:0006811; C:GO:0016020; C:GO:0016021; P:GO:0034765	P:potassium ion transmembrane transport; P:transmembrane transport; C:voltage-gated potassium channel complex; F:delayed rectifier potassium channel activity; P:protein homooligomerization; F:voltage-gated ion channel activity; F:potassium channel activity; P:transport; C:plasma membrane; P:potassium ion transport; F:voltage-gated potassium channel activity; F:ion channel activity; P:ion transpor…
AgB02_g160_t03	elegans confirmed by transcript evidence	269	20	0	56	8	P:GO:0006833; P:GO:0045087; C:GO:0016020; C:GO:0016021; F:GO:0015250; P:GO:0006810; C:GO:0005886; F:GO:0005215	P:water transport; P:innate immune response; C:membrane; C:integral component of membrane; F:water channel activity; P:transport; C:plasma membrane; F:transporter activity
AgB02_g161_t01	YT66_CAEEL ame: Full=Probable G- coupled receptor	190	10	1.39383e-37	53.1	7	F:GO:0004930; P:GO:0007186; P:GO:0007165; C:GO:0016020; C:GO:0016021; F:GO:0004871; C:GO:0005886	F:G-protein coupled receptor activity; P:G-protein coupled receptor signaling pathway; P:signal transduction; C:membrane; C:integral component of membrane; F:signal transducer activity; C:plasma membrane
AgB02_g162_t01	---NA---	111
AgB02_g163_t01	UNC93 -like	437	20	0	66.8	15	P:GO:0019915; P:GO:0055085; C:GO:0055120; P:GO:0040011; P:GO:0043266; P:GO:0006810; C:GO:0005886; P:GO:0006813; C:GO:0005887; P:GO:0006811; C:GO:0016020; P:GO:0006937; C:GO:0016021; P:GO:0016477; F:GO:0015459	P:lipid storage; P:transmembrane transport; C:striated muscle dense body; P:locomotion; P:regulation of potassium ion transport; P:transport; C:plasma membrane; P:potassium ion transport; C:integral component of plasma membrane; P:ion transport; C:membrane; P:regulation of muscle contraction; C:integral component of membrane; P:cell migration; F:potassium channel regulator activity
AgB02_g164_t01	Unknown	127	6	1.70443e-17	64.17
AgB02_g165_t02	Neurotransmitter-gated ion-channel ligand binding domain containing	74	20	1.22451e-14	75.85	12	P:GO:0006811; P:GO:1902476; P:GO:0034220; C:GO:0016020; C:GO:0016021; F:GO:0005230; C:GO:0030054; F:GO:0005254; C:GO:0045202; P:GO:0006810; P:GO:0006821; C:GO:0005886	P:ion transport; P:chloride transmembrane transport; P:ion transmembrane transport; C:membrane; C:integral component of membrane; F:extracellular ligand-gated ion channel activity; C:cell junction; F:chloride channel activity; C:synapse; P:transport; P:chloride transport; C:plasma membrane
AgB02_g166_t01	hypothetical protein T10H9.1	131	6	1.64434e-21	69	2	C:GO:0016020; C:GO:0016021	C:membrane; C:integral component of membrane
AgB02_g167_t01	hypothetical protein T10H9.1	113	4	1.16398e-27	70.25	2	C:GO:0016020; C:GO:0016021	C:membrane; C:integral component of membrane
AgB02_g168_t01	Sodium chloride cotransporter 3	951	20	0	75.35	19	F:GO:0015379; P:GO:0055085; P:GO:0071805; P:GO:1902476; P:GO:0009792; P:GO:0031283; F:GO:0022820; P:GO:0007268; F:GO:0015293; P:GO:0006810; P:GO:0006821; F:GO:0005215; P:GO:0006813; P:GO:0032528; P:GO:0006814; P:GO:0006811; C:GO:0016020; C:GO:0016021; C:GO:0016324	F:potassium:chloride symporter activity; P:transmembrane transport; P:potassium ion transmembrane transport; P:chloride transmembrane transport; P:embryo development ending in birth or egg hatching; P:negative regulation of guanylate cyclase activity; F:potassium ion symporter activity; P:chemical synaptic transmission; F:symporter activity; P:transport; P:chloride transport; F:transporter activi…
AgB02_g169_t01	Dihydroxyacetone phosphate acyltransferase	678	20	0	59.85	18	P:GO:0061024; F:GO:0016746; F:GO:0008374; P:GO:0008152; P:GO:0044255; P:GO:0042552; F:GO:0005102; P:GO:0008611; P:GO:0021587; C:GO:0005778; C:GO:0005777; F:GO:0016290; P:GO:0007416; P:GO:0030913; F:GO:0003824; C:GO:0016020; F:GO:0016287; F:GO:0016740	P:membrane organization; F:transferase activity, transferring acyl groups; F:O-acyltransferase activity; P:metabolic process; P:cellular lipid metabolic process; P:myelination; F:receptor binding; P:ether lipid biosynthetic process; P:cerebellum morphogenesis; C:peroxisomal membrane; C:peroxisome; F:palmitoyl-CoA hydrolase activity; P:synapse assembly; P:paranodal junction assembly; F:catalytic a…
AgB02_g170_t02	elegans ly confirmed by transcript evidence	257	20	1.08699e-128	60.45	10	P:GO:0006813; C:GO:0005887; P:GO:0006811; P:GO:0071805; C:GO:0016020; C:GO:0016021; F:GO:0005267; P:GO:0030322; P:GO:0006810; F:GO:0022841	P:potassium ion transport; C:integral component of plasma membrane; P:ion transport; P:potassium ion transmembrane transport; C:membrane; C:integral component of membrane; F:potassium channel activity; P:stabilization of membrane potential; P:transport; F:potassium ion leak channel activity
AgB02_g171_t01	---NA---	108
AgB02_g172_t01	major facilitator family	578	20	0	51.8	6	F:GO:0003676; P:GO:0055085; C:GO:0016020; P:GO:0015718; C:GO:0016021; F:GO:0008028	F:nucleic acid binding; P:transmembrane transport; C:membrane; P:monocarboxylic acid transport; C:integral component of membrane; F:monocarboxylic acid transmembrane transporter activity
AgB02_g173_t01	monocarboxylate transporter	66	20	1.60312e-35	70.85	16	P:GO:0055085; F:GO:0016818; F:GO:0008026; F:GO:0004386; F:GO:0004003; P:GO:0006139; F:GO:0008028; F:GO:0000166; F:GO:0003676; F:GO:0003677; F:GO:0005524; P:GO:0032508; C:GO:0016020; P:GO:0015718; C:GO:0016021; F:GO:0016787	P:transmembrane transport; F:hydrolase activity, acting on acid anhydrides, in phosphorus-containing anhydrides; F:ATP-dependent helicase activity; F:helicase activity; F:ATP-dependent DNA helicase activity; P:nucleobase-containing compound metabolic process; F:monocarboxylic acid transmembrane transporter activity; F:nucleotide binding; F:nucleic acid binding; F:DNA binding; F:ATP binding; P:DNA…
AgB02_g174_t01	Cell cycle checkpoint RAD17	581	20	0	48.9	24	P:GO:0006281; P:GO:0007093; P:GO:0007275; P:GO:0006260; P:GO:1901796; P:GO:0000724; P:GO:0008156; F:GO:0003682; C:GO:0005730; P:GO:0006974; P:GO:0007049; P:GO:0042325; C:GO:0005654; F:GO:0000166; P:GO:0000077; C:GO:0000781; F:GO:0005524; C:GO:0005634; F:GO:0003689; P:GO:0000076; F:GO:0005515; C:GO:0000790; C:GO:0031389; P:GO:0033314	P:DNA repair; P:mitotic cell cycle checkpoint; P:multicellular organism development; P:DNA replication; P:regulation of signal transduction by p53 class mediator; P:double-strand break repair via homologous recombination; P:negative regulation of DNA replication; F:chromatin binding; C:nucleolus; P:cellular response to DNA damage stimulus; P:cell cycle; P:regulation of phosphorylation; C:nucleopl…
AgB02_g175_t06	tetraspanin family	476	20	0	60.05	11	C:GO:0005887; C:GO:0016020; P:GO:0090002; C:GO:0016021; P:GO:0007166; P:GO:0051604; P:GO:0045747; C:GO:0097197; C:GO:0005886; C:GO:0009986; F:GO:0019899	C:integral component of plasma membrane; C:membrane; P:establishment of protein localization to plasma membrane; C:integral component of membrane; P:cell surface receptor signaling pathway; P:protein maturation; P:positive regulation of Notch signaling pathway; C:tetraspanin-enriched microdomain; C:plasma membrane; C:cell surface; F:enzyme binding
AgB02_g176_t01	---NA---	115
AgB02_g177_t02	UBASH3A homolog	290	20	0	64.75	19	F:GO:0042802; P:GO:0090331; P:GO:0045779; C:GO:0005575; P:GO:0006469; P:GO:0051279; C:GO:0005634; F:GO:0004721; F:GO:0005515; P:GO:0009968; C:GO:0005737; F:GO:0004725; P:GO:0045670; P:GO:0045671; F:GO:0016791; C:GO:0005829; P:GO:0016311; P:GO:0035335; F:GO:0016787	F:identical protein binding; P:negative regulation of platelet aggregation; P:negative regulation of bone resorption; C:cellular_component; P:negative regulation of protein kinase activity; P:regulation of release of sequestered calcium ion into cytosol; C:nucleus; F:phosphoprotein phosphatase activity; F:protein binding; P:negative regulation of signal transduction; C:cytoplasm; F:protein tyrosi…
AgB02_g178_t01	---NA---	149
AgB02_g179_t02	Ubiquitin-associated and SH3 domain-containing B	263	20	2.7104e-109	60.35	3	F:GO:0016791; C:GO:0005829; P:GO:0016311	F:phosphatase activity; C:cytosol; P:dephosphorylation
AgB02_g180_t01	elegans ly confirmed by transcript evidence	139	6	3.52011e-15	75.83
AgB02_g181_t04	casein kinase epsilon	317	20	0	93.15	47	P:GO:0008360; P:GO:0007030; C:GO:0005794; P:GO:0048512; C:GO:0043025; P:GO:0042752; P:GO:0006468; C:GO:0043005; P:GO:0061512; P:GO:0032091; C:GO:0030426; F:GO:0000166; P:GO:0051225; F:GO:0005524; P:GO:0032922; C:GO:0030529; P:GO:0016055; P:GO:0016310; P:GO:0071539; P:GO:0034067; P:GO:2000052; P:GO:0007020; P:GO:0090263; P:GO:1902004; F:GO:0004672; F:GO:0004674; P:GO:0006897; P:GO:0007623; C:GO:00…	P:regulation of cell shape; P:Golgi organization; C:Golgi apparatus; P:circadian behavior; C:neuronal cell body; P:regulation of circadian rhythm; P:protein phosphorylation; C:neuron projection; P:protein localization to cilium; P:negative regulation of protein binding; C:growth cone; F:nucleotide binding; P:spindle assembly; F:ATP binding; P:circadian regulation of gene expression; C:intracellul…
AgB02_g182_t06	elegans ly confirmed by transcript evidence	332	7	1.41066e-17	51.29
AgB02_g183_t05	Disorganized muscle 1	321	20	0	81.35	10	F:GO:0000166; F:GO:0005524; C:GO:0005737; P:GO:0071688; F:GO:0004672; P:GO:0016310; F:GO:0016740; P:GO:0006468; F:GO:0016301; F:GO:0004687	F:nucleotide binding; F:ATP binding; C:cytoplasm; P:striated muscle myosin thick filament assembly; F:protein kinase activity; P:phosphorylation; F:transferase activity; P:protein phosphorylation; F:kinase activity; F:myosin light chain kinase activity
AgB02_g184_t01	---NA---	88
AgB02_g185_t03	Stargazin (mammalian calcium channel) homolog isoform ly confirmed by transcript evidence	102	8	1.21531e-18	71.5	10	C:GO:0032281; C:GO:0016020; C:GO:0016021; P:GO:2000311; P:GO:0070588; P:GO:0008344; P:GO:0051968; P:GO:0019226; F:GO:0005245; F:GO:0016247	C:AMPA glutamate receptor complex; C:membrane; C:integral component of membrane; P:regulation of AMPA receptor activity; P:calcium ion transmembrane transport; P:adult locomotory behavior; P:positive regulation of synaptic transmission, glutamatergic; P:transmission of nerve impulse; F:voltage-gated calcium channel activity; F:channel regulator activity
AgB02_g186_t09	glycosyl transferase family 8	702	20	0	67.65	62	P:GO:0006486; C:GO:0000139; P:GO:0006044; C:GO:0005794; F:GO:0004583; P:GO:0006688; F:GO:0008417; C:GO:0043231; F:GO:0031278; F:GO:0030145; F:GO:0016757; F:GO:0080062; F:GO:0016759; P:GO:0006493; P:GO:0008152; F:GO:0003980; F:GO:0000026; F:GO:0008755; F:GO:0045140; F:GO:0000033; F:GO:0000030; F:GO:0046872; F:GO:0019112; P:GO:0035269; F:GO:0052824; P:GO:0046716; C:GO:0030173; F:GO:0008921; P:GO:00…	P:protein glycosylation; C:Golgi membrane; P:N-acetylglucosamine metabolic process; C:Golgi apparatus; F:dolichyl-phosphate-glucose-glycolipid alpha-glucosyltransferase activity; P:glycosphingolipid biosynthetic process; F:fucosyltransferase activity; C:intracellular membrane-bounded organelle; F:alpha-1,2-galactosyltransferase activity; F:manganese ion binding; F:transferase activity, transferri…
AgB02_g187_t01	Stress-activated kinase JNK	406	20	0	89.35	56	P:GO:0043508; F:GO:0005230; P:GO:0007411; P:GO:0007298; P:GO:0007254; P:GO:0007258; C:GO:0030425; P:GO:0042060; P:GO:0030707; P:GO:0016055; P:GO:0035313; C:GO:0030424; P:GO:0016319; P:GO:0034220; F:GO:0004672; F:GO:0004674; P:GO:0006810; P:GO:0048803; P:GO:0007616; P:GO:0010508; F:GO:0005515; F:GO:0004705; P:GO:0071243; F:GO:0004707; P:GO:0034614; P:GO:0007391; P:GO:0048812; P:GO:0006468; P:GO:00…	P:negative regulation of JUN kinase activity; F:extracellular ligand-gated ion channel activity; P:axon guidance; P:border follicle cell migration; P:JNK cascade; P:JUN phosphorylation; C:dendrite; P:wound healing; P:ovarian follicle cell development; P:Wnt signaling pathway; P:wound healing, spreading of epidermal cells; C:axon; P:mushroom body development; P:ion transmembrane transport; F:prote…
AgB02_g188_t01	guanine nucleotide-binding subunit alpha	334	20	3.14594e-42	50.9	13	P:GO:0007191; P:GO:0007186; P:GO:0007165; P:GO:0007188; F:GO:0004871; F:GO:0000166; F:GO:0005525; F:GO:0001664; P:GO:0007606; C:GO:0005834; F:GO:0003924; F:GO:0019001; F:GO:0031683	P:adenylate cyclase-activating dopamine receptor signaling pathway; P:G-protein coupled receptor signaling pathway; P:signal transduction; P:adenylate cyclase-modulating G-protein coupled receptor signaling pathway; F:signal transducer activity; F:nucleotide binding; F:GTP binding; F:G-protein coupled receptor binding; P:sensory perception of chemical stimulus; C:heterotrimeric G-protein complex;…
AgB02_g189_t02	---NA---	133
AgB02_g190_t01	WD repeat-containing mio	95	3	1.36377e-53	75.67
AgB02_g191_t06	WD repeat-containing mio	369	20	0	49.15	12	P:GO:0034629; C:GO:0005634; F:GO:0005515; C:GO:0005737; P:GO:0034198; C:GO:0030054; C:GO:0005575; P:GO:0032008; C:GO:0061700; F:GO:0003674; C:GO:0005765; C:GO:0005654	P:cellular protein complex localization; C:nucleus; F:protein binding; C:cytoplasm; P:cellular response to amino acid starvation; C:cell junction; C:cellular_component; P:positive regulation of TOR signaling; C:GATOR2 complex; F:molecular_function; C:lysosomal membrane; C:nucleoplasm
AgB02_g192_t01	elegans ly confirmed by transcript evidence	728	20	1.67768e-78	56.65	13	P:GO:0071805; P:GO:0040011; P:GO:0009792; P:GO:0010171; F:GO:0005267; P:GO:0006810; F:GO:0022841; P:GO:0006813; C:GO:0005887; P:GO:0006811; C:GO:0016020; C:GO:0016021; P:GO:0030322	P:potassium ion transmembrane transport; P:locomotion; P:embryo development ending in birth or egg hatching; P:body morphogenesis; F:potassium channel activity; P:transport; F:potassium ion leak channel activity; P:potassium ion transport; C:integral component of plasma membrane; P:ion transport; C:membrane; C:integral component of membrane; P:stabilization of membrane potential
AgB02_g193_t01	elegans confirmed by transcript evidence	221	16	1.95207e-79	58.31	2	C:GO:0016020; C:GO:0016021	C:membrane; C:integral component of membrane
AgB02_g194_t02	Myotubularin-related 9	579	20	0	66.8	10	F:GO:0019902; F:GO:0004438; F:GO:0005515; C:GO:0005737; P:GO:0050790; C:GO:0016020; P:GO:0006907; P:GO:0030334; P:GO:0006897; F:GO:0030234	F:phosphatase binding; F:phosphatidylinositol-3-phosphatase activity; F:protein binding; C:cytoplasm; P:regulation of catalytic activity; C:membrane; P:pinocytosis; P:regulation of cell migration; P:endocytosis; F:enzyme regulator activity
AgB02_g195_t01	---NA---	169
AgB02_g196_t03	Hyaluronidase family	921	20	0	55.1	16	P:GO:0019915; P:GO:0040024; P:GO:0060051; P:GO:0009100; P:GO:0006470; P:GO:0006464; P:GO:0006044; F:GO:0004722; P:GO:0006517; C:GO:0005634; P:GO:0005977; F:GO:0015929; C:GO:0016020; C:GO:0005829; F:GO:0016231; P:GO:0016573	P:lipid storage; P:dauer larval development; P:negative regulation of protein glycosylation; P:glycoprotein metabolic process; P:protein dephosphorylation; P:cellular protein modification process; P:N-acetylglucosamine metabolic process; F:protein serine/threonine phosphatase activity; P:protein deglycosylation; C:nucleus; P:glycogen metabolic process; F:hexosaminidase activity; C:membrane; C:cyt…
AgB02_g197_t03	DCC-interacting 13-alpha	555	20	0	44.65	16	P:GO:0008283; F:GO:0042802; P:GO:0090003; F:GO:0043422; P:GO:0046324; C:GO:0005634; C:GO:0005623; C:GO:0005769; F:GO:0005515; C:GO:0005768; C:GO:0070062; C:GO:0012506; C:GO:0016581; P:GO:0042593; C:GO:0005829; C:GO:0010008	P:cell proliferation; F:identical protein binding; P:regulation of establishment of protein localization to plasma membrane; F:protein kinase B binding; P:regulation of glucose import; C:nucleus; C:cell; C:early endosome; F:protein binding; C:endosome; C:extracellular exosome; C:vesicle membrane; C:NuRD complex; P:glucose homeostasis; C:cytosol; C:endosome membrane
AgB02_g198_t03	---NA---	594
AgB02_g199_t02	Serine threonine- phosphatase 2B catalytic subunit 2	513	20	0	91.1	40	P:GO:0019915; P:GO:0040011; P:GO:0040010; P:GO:0008340; C:GO:0043025; C:GO:0043204; C:GO:0042995; P:GO:0007635; P:GO:0040018; P:GO:0007610; P:GO:0034608; P:GO:0006935; P:GO:0070262; C:GO:0030425; P:GO:0034606; P:GO:0043052; F:GO:0005509; C:GO:0005929; P:GO:0040040; P:GO:0019722; C:GO:0030424; F:GO:0033192; P:GO:0040024; P:GO:0006470; P:GO:0008355; P:GO:0006897; P:GO:0042048; P:GO:0006972; C:GO:00…	P:lipid storage; P:locomotion; P:positive regulation of growth rate; P:determination of adult lifespan; C:neuronal cell body; C:perikaryon; C:cell projection; P:chemosensory behavior; P:positive regulation of multicellular organism growth; P:behavior; P:vulval location; P:chemotaxis; P:peptidyl-serine dephosphorylation; C:dendrite; P:response to hermaphrodite contact; P:thermotaxis; F:calcium ion…
AgB02_g200_t01	---NA---	135
AgB02_g201_t01	---NA---	104
AgB02_g202_t01	---NA---	124
AgB02_g203_t03	---NA---	113
AgB02_g204_t01	---NA---	117
AgB02_g205_t01	phosphatase 1 regulatory subunit 3D	398	20	0	54.2	9	P:GO:0005975; F:GO:0004721; P:GO:0005977; P:GO:0005979; C:GO:0043231; P:GO:0006470; P:GO:0005981; C:GO:0042587; F:GO:0019899	P:carbohydrate metabolic process; F:phosphoprotein phosphatase activity; P:glycogen metabolic process; P:regulation of glycogen biosynthetic process; C:intracellular membrane-bounded organelle; P:protein dephosphorylation; P:regulation of glycogen catabolic process; C:glycogen granule; F:enzyme binding
AgB02_g206_t01	elegans confirmed by transcript evidence	191	7	1.1614e-137	67	10	C:GO:0034707; C:GO:0005887; P:GO:0006811; P:GO:1902476; C:GO:0016020; C:GO:0016021; F:GO:0005254; P:GO:0006810; P:GO:0006821; C:GO:0005886	C:chloride channel complex; C:integral component of plasma membrane; P:ion transport; P:chloride transmembrane transport; C:membrane; C:integral component of membrane; F:chloride channel activity; P:transport; P:chloride transport; C:plasma membrane
AgB02_g207_t01	methionine aminopeptidase	469	20	0	80.75	10	P:GO:0070084; C:GO:0022626; C:GO:0005737; F:GO:0046872; P:GO:0006508; F:GO:0070006; F:GO:0008235; F:GO:0004177; F:GO:0008233; F:GO:0016787	P:protein initiator methionine removal; C:cytosolic ribosome; C:cytoplasm; F:metal ion binding; P:proteolysis; F:metalloaminopeptidase activity; F:metalloexopeptidase activity; F:aminopeptidase activity; F:peptidase activity; F:hydrolase activity
AgB02_g208_t04	Solute carrier family 12 member 2	1145	20	0	59.15	25	C:GO:1903561; F:GO:0015377; P:GO:0015696; P:GO:1902476; F:GO:0015293; P:GO:0006821; F:GO:0005215; F:GO:0008519; P:GO:0006813; P:GO:0006814; C:GO:0005887; P:GO:0006811; C:GO:0070062; P:GO:0072488; P:GO:0030321; F:GO:0019901; P:GO:0055085; F:GO:0008511; P:GO:0006810; C:GO:0005886; F:GO:0005515; C:GO:0016020; C:GO:0016021; C:GO:0016324; P:GO:0070634	C:extracellular vesicle; F:cation:chloride symporter activity; P:ammonium transport; P:chloride transmembrane transport; F:symporter activity; P:chloride transport; F:transporter activity; F:ammonium transmembrane transporter activity; P:potassium ion transport; P:sodium ion transport; C:integral component of plasma membrane; P:ion transport; C:extracellular exosome; P:ammonium transmembrane tran…
AgB02_g209_t01	hematopoietically-expressed homeobox hhex	194	20	5.89888e-53	78.2	15	P:GO:0006351; P:GO:0007275; P:GO:0035162; P:GO:0009952; P:GO:0006355; F:GO:0043565; P:GO:0001570; P:GO:0000122; F:GO:0003677; P:GO:0007507; C:GO:0005634; P:GO:0045892; P:GO:0001889; P:GO:0016055; P:GO:0030177	P:transcription, DNA-templated; P:multicellular organism development; P:embryonic hemopoiesis; P:anterior/posterior pattern specification; P:regulation of transcription, DNA-templated; F:sequence-specific DNA binding; P:vasculogenesis; P:negative regulation of transcription from RNA polymerase II promoter; F:DNA binding; P:heart development; C:nucleus; P:negative regulation of transcription, DNA-…
AgB02_g210_t01	gex interacting 10	836	20	3.61201e-149	62.4	13	P:GO:0019915; P:GO:0040011; P:GO:0030163; C:GO:0005863; F:GO:0005515; C:GO:0005737; P:GO:0051493; C:GO:0016020; C:GO:0016021; F:GO:0017022; P:GO:0071688; C:GO:0031430; F:GO:0008092	P:lipid storage; P:locomotion; P:protein catabolic process; C:striated muscle myosin thick filament; F:protein binding; C:cytoplasm; P:regulation of cytoskeleton organization; C:membrane; C:integral component of membrane; F:myosin binding; P:striated muscle myosin thick filament assembly; C:M band; F:cytoskeletal protein binding
AgB02_g211_t01	Unknown	88	5	4.94016e-32	70.8	2	C:GO:0016020; C:GO:0016021	C:membrane; C:integral component of membrane
AgB02_g212_t04	hypothetical protein CRE_17237	180	6	4.17709e-15	54.33
AgB02_g213_t02	hypothetical protein CRE_17237	180	6	4.17709e-15	54.33
AgB02_g214_t01	elegans confirmed by transcript evidence	1146	20	0	60.45	23	F:GO:0016887; P:GO:0006351; P:GO:0009792; P:GO:0006355; F:GO:0003682; P:GO:0045944; P:GO:0006325; C:GO:0005575; P:GO:0007126; F:GO:0003674; C:GO:0005654; F:GO:0000166; C:GO:0005634; F:GO:0005524; F:GO:0005515; C:GO:0070062; P:GO:0008406; P:GO:0045893; F:GO:0042393; P:GO:0031936; P:GO:0045132; P:GO:0031445; F:GO:0016787	F:ATPase activity; P:transcription, DNA-templated; P:embryo development ending in birth or egg hatching; P:regulation of transcription, DNA-templated; F:chromatin binding; P:positive regulation of transcription from RNA polymerase II promoter; P:chromatin organization; C:cellular_component; P:meiotic nuclear division; F:molecular_function; C:nucleoplasm; F:nucleotide binding; C:nucleus; F:ATP bin…
AgB02_g215_t01	---NA---	108
AgB02_g216_t03	Inositol monophosphatase family	347	20	0	60.65	7	F:GO:0000287; F:GO:0008441; C:GO:0005737; P:GO:0046854; P:GO:0016311; P:GO:0006139; F:GO:0016787	F:magnesium ion binding; F:3'(2'),5'-bisphosphate nucleotidase activity; C:cytoplasm; P:phosphatidylinositol phosphorylation; P:dephosphorylation; P:nucleobase-containing compound metabolic process; F:hydrolase activity
AgB02_g217_t03	hypothetical protein CRE_00220	215	9	5.38894e-16	50.33	9	P:GO:0034729; C:GO:0005634; F:GO:0031151; F:GO:0018024; F:GO:0008168; P:GO:0051726; F:GO:0016740; P:GO:0032259; F:GO:0016787	P:histone H3-K79 methylation; C:nucleus; F:histone methyltransferase activity (H3-K79 specific); F:histone-lysine N-methyltransferase activity; F:methyltransferase activity; P:regulation of cell cycle; F:transferase activity; P:methylation; F:hydrolase activity
AgB02_g218_t01	hypothetical protein LOAG_11215	170	1	2.37866e-12	58
AgB02_g219_t01	Organic solute transporter alpha	349	20	0	59.45	7	P:GO:0009792; C:GO:0016020; C:GO:0016021; P:GO:0006810; C:GO:1990075; F:GO:0005215; C:GO:0005886	P:embryo development ending in birth or egg hatching; C:membrane; C:integral component of membrane; P:transport; C:periciliary membrane compartment; F:transporter activity; C:plasma membrane
AgB02_g220_t01	elegans confirmed by transcript evidence	560	20	0	65.9	10	C:GO:0034707; C:GO:0005887; P:GO:0006811; P:GO:1902476; C:GO:0016020; C:GO:0016021; F:GO:0005254; P:GO:0006810; P:GO:0006821; C:GO:0005886	C:chloride channel complex; C:integral component of plasma membrane; P:ion transport; P:chloride transmembrane transport; C:membrane; C:integral component of membrane; F:chloride channel activity; P:transport; P:chloride transport; C:plasma membrane
AgB02_g221_t01	---NA---	98
AgB02_g222_t01	Serine arginine repetitive matrix 2	1062	20	0	55.55	9	P:GO:0040027; P:GO:0008150; P:GO:0040035; C:GO:0000790; P:GO:0002119; C:GO:0016607; P:GO:0009792; P:GO:0008340; P:GO:0000003	P:negative regulation of vulval development; P:biological_process; P:hermaphrodite genitalia development; C:nuclear chromatin; P:nematode larval development; C:nuclear speck; P:embryo development ending in birth or egg hatching; P:determination of adult lifespan; P:reproduction
AgB02_g223_t01	Paired box domain containing	243	20	5.33953e-34	74.95	10	F:GO:0003676; F:GO:0003677; C:GO:0005634; F:GO:0008270; P:GO:0019915; P:GO:0007275; F:GO:0046872; P:GO:0006351; P:GO:0009792; P:GO:0006355	F:nucleic acid binding; F:DNA binding; C:nucleus; F:zinc ion binding; P:lipid storage; P:multicellular organism development; F:metal ion binding; P:transcription, DNA-templated; P:embryo development ending in birth or egg hatching; P:regulation of transcription, DNA-templated
AgB02_g224_t01	Hypothetical protein CBG21853	190	3	9.80772e-08	49.67	2	P:GO:0006629; F:GO:0016787	P:lipid metabolic process; F:hydrolase activity
AgB02_g225_t01	elegans confirmed by transcript evidence	223	20	1.57703e-50	54.2	2	P:GO:0006629; F:GO:0016787	P:lipid metabolic process; F:hydrolase activity
AgB02_g226_t01	---NA---	112
AgB02_g227_t01	---NA---	161
AgB02_g228_t03	leucine-rich repeat neuronal 1-like	515	20	0	46.15	7	F:GO:0004721; P:GO:0007409; C:GO:0016020; P:GO:0006470; C:GO:0016021; P:GO:0051965; F:GO:0016787	F:phosphoprotein phosphatase activity; P:axonogenesis; C:membrane; P:protein dephosphorylation; C:integral component of membrane; P:positive regulation of synapse assembly; F:hydrolase activity
AgB02_g229_t01	---NA---	99
AgB02_g230_t02	leucine Rich repeat-containing domain	633	20	0	54.45	15	P:GO:0035385; C:GO:0032590; F:GO:0004180; F:GO:0008201; C:GO:0005886; C:GO:0005578; P:GO:0048846; P:GO:0048813; F:GO:0048495; C:GO:0005615; P:GO:0050770; C:GO:0016020; P:GO:0006508; C:GO:0016021; P:GO:0016358	P:Roundabout signaling pathway; C:dendrite membrane; F:carboxypeptidase activity; F:heparin binding; C:plasma membrane; C:proteinaceous extracellular matrix; P:axon extension involved in axon guidance; P:dendrite morphogenesis; F:Roundabout binding; C:extracellular space; P:regulation of axonogenesis; C:membrane; P:proteolysis; C:integral component of membrane; P:dendrite development
AgB02_g231_t01	deoxyribonuclease II	135	20	1.10984e-17	62.8	18	P:GO:0007275; P:GO:0000737; P:GO:0008340; F:GO:0004531; F:GO:0004520; P:GO:0006259; C:GO:0005622; C:GO:0005764; P:GO:0006308; F:GO:0003677; C:GO:0005634; P:GO:0030218; C:GO:0070062; P:GO:0006309; F:GO:0004519; F:GO:0004518; P:GO:0006915; F:GO:0016787	P:multicellular organism development; P:DNA catabolic process, endonucleolytic; P:determination of adult lifespan; F:deoxyribonuclease II activity; F:endodeoxyribonuclease activity; P:DNA metabolic process; C:intracellular; C:lysosome; P:DNA catabolic process; F:DNA binding; C:nucleus; P:erythrocyte differentiation; C:extracellular exosome; P:apoptotic DNA fragmentation; F:endonuclease activity; …
AgB02_g232_t01	deoxyribonuclease ii	252	20	3.35259e-50	53.45	16	P:GO:0090305; P:GO:0008340; P:GO:0000737; F:GO:0004531; C:GO:0005576; F:GO:0004520; P:GO:0006259; C:GO:0005622; C:GO:0005764; C:GO:0005634; C:GO:0005737; P:GO:0006309; F:GO:0004519; F:GO:0004518; P:GO:0006915; F:GO:0016787	P:nucleic acid phosphodiester bond hydrolysis; P:determination of adult lifespan; P:DNA catabolic process, endonucleolytic; F:deoxyribonuclease II activity; C:extracellular region; F:endodeoxyribonuclease activity; P:DNA metabolic process; C:intracellular; C:lysosome; C:nucleus; C:cytoplasm; P:apoptotic DNA fragmentation; F:endonuclease activity; F:nuclease activity; P:apoptotic process; F:hydrol…
AgB02_g233_t02	---NA---	255
AgB02_g234_t04	Transcription factor IIIB 90 kDa subunit	1171	20	0	70.85	15	F:GO:0008270; P:GO:0006384; P:GO:0006351; P:GO:0006355; P:GO:0006352; P:GO:0043488; C:GO:0000126; P:GO:0006413; C:GO:0005575; P:GO:0045945; F:GO:0003674; F:GO:0003743; C:GO:0005634; F:GO:0046872; F:GO:0017025	F:zinc ion binding; P:transcription initiation from RNA polymerase III promoter; P:transcription, DNA-templated; P:regulation of transcription, DNA-templated; P:DNA-templated transcription, initiation; P:regulation of mRNA stability; C:transcription factor TFIIIB complex; P:translational initiation; C:cellular_component; P:positive regulation of transcription from RNA polymerase III promoter; F:m…
AgB02_g235_t03	beta-tubulin isotype 2	450	20	0	90.45	17	P:GO:0035046; P:GO:0040035; P:GO:0007010; P:GO:0009792; F:GO:0005198; F:GO:0005200; P:GO:0007635; P:GO:0040018; P:GO:0000003; C:GO:0005874; P:GO:0007017; F:GO:0000166; F:GO:0005525; C:GO:0005856; C:GO:0005737; P:GO:0002119; F:GO:0003924	P:pronuclear migration; P:hermaphrodite genitalia development; P:cytoskeleton organization; P:embryo development ending in birth or egg hatching; F:structural molecule activity; F:structural constituent of cytoskeleton; P:chemosensory behavior; P:positive regulation of multicellular organism growth; P:reproduction; C:microtubule; P:microtubule-based process; F:nucleotide binding; F:GTP binding; C…
AgB02_g236_t01	SOSS complex subunit B1	213	20	4.78515e-142	71.1	21	P:GO:0006281; P:GO:0007093; F:GO:0061730; P:GO:1904355; P:GO:0000724; P:GO:0042795; P:GO:0006974; C:GO:0000784; C:GO:0005654; F:GO:0003697; P:GO:0051972; F:GO:0003676; F:GO:0003677; C:GO:0005634; F:GO:0005515; C:GO:0005737; P:GO:0070200; F:GO:0098505; C:GO:0070876; F:GO:0019899; P:GO:0010212	P:DNA repair; P:mitotic cell cycle checkpoint; F:C-rich strand telomeric DNA binding; P:positive regulation of telomere capping; P:double-strand break repair via homologous recombination; P:snRNA transcription from RNA polymerase II promoter; P:cellular response to DNA damage stimulus; C:nuclear chromosome, telomeric region; C:nucleoplasm; F:single-stranded DNA binding; P:regulation of telomerase…
AgB02_g237_t01	VWFA and cache domain-containing 1	870	20	0	51.65	5	P:GO:0006811; C:GO:0016020; P:GO:0006816; C:GO:0016021; P:GO:0006810	P:ion transport; C:membrane; P:calcium ion transport; C:integral component of membrane; P:transport
AgB02_g238_t01	---NA---	128
AgB02_g239_t01	1,2-dihydroxy-3-keto-5-methylthiopentene dioxygenase	98	14	3.47127e-52	69.86	13	P:GO:0009086; F:GO:0016702; P:GO:0019509; P:GO:0009792; P:GO:0008652; P:GO:0000003; P:GO:0006555; F:GO:0051213; C:GO:0005634; C:GO:0005737; F:GO:0016491; F:GO:0010309; P:GO:0055114	P:methionine biosynthetic process; F:oxidoreductase activity, acting on single donors with incorporation of molecular oxygen, incorporation of two atoms of oxygen; P:L-methionine salvage from methylthioadenosine; P:embryo development ending in birth or egg hatching; P:cellular amino acid biosynthetic process; P:reproduction; P:methionine metabolic process; F:dioxygenase activity; C:nucleus; C:cyt…
AgB02_g240_t10	saposin precursor	423	20	6.00715e-83	53.15	9	F:GO:0001664; C:GO:0005737; P:GO:0043085; P:GO:0006629; P:GO:0040020; F:GO:0008047; P:GO:0042127; C:GO:0005764; P:GO:0006665	F:G-protein coupled receptor binding; C:cytoplasm; P:positive regulation of catalytic activity; P:lipid metabolic process; P:regulation of meiotic nuclear division; F:enzyme activator activity; P:regulation of cell proliferation; C:lysosome; P:sphingolipid metabolic process
AgB02_g241_t02	isocitrate dehydrogenase gamma subunit	399	20	0	76.35	14	P:GO:0040035; F:GO:0016616; P:GO:0009792; P:GO:0006099; P:GO:0000003; F:GO:0000287; F:GO:0004449; F:GO:0016491; F:GO:0051287; F:GO:0046872; C:GO:0005739; C:GO:0016020; C:GO:0016021; P:GO:0055114	P:hermaphrodite genitalia development; F:oxidoreductase activity, acting on the CH-OH group of donors, NAD or NADP as acceptor; P:embryo development ending in birth or egg hatching; P:tricarboxylic acid cycle; P:reproduction; F:magnesium ion binding; F:isocitrate dehydrogenase (NAD+) activity; F:oxidoreductase activity; F:NAD binding; F:metal ion binding; C:mitochondrion; C:membrane; C:integral c…
AgB02_g242_t04	Ovochymase 1	187	20	1.33048e-11	51.05	7	F:GO:0046872; P:GO:0006508; F:GO:0004252; F:GO:0008236; F:GO:0008233; C:GO:0005576; F:GO:0016787	F:metal ion binding; P:proteolysis; F:serine-type endopeptidase activity; F:serine-type peptidase activity; F:peptidase activity; C:extracellular region; F:hydrolase activity
AgB02_g243_t01	---NA---	89
AgB02_g244_t06	immunoglobulin I-set domain-containing	1329	20	0	66.85	37	P:GO:0035385; P:GO:0040011; P:GO:0007275; P:GO:0009792; P:GO:0007399; P:GO:0007411; P:GO:0007155; F:GO:0008046; P:GO:0007156; P:GO:0006935; C:GO:0005887; P:GO:0048264; P:GO:0001764; C:GO:0070062; P:GO:0050772; P:GO:0001822; P:GO:0016199; P:GO:0071679; P:GO:0051964; P:GO:0061364; F:GO:0042802; P:GO:0031290; P:GO:0007420; C:GO:0009986; P:GO:0021891; F:GO:0005515; P:GO:0007417; P:GO:0001656; P:GO:00…	P:Roundabout signaling pathway; P:locomotion; P:multicellular organism development; P:embryo development ending in birth or egg hatching; P:nervous system development; P:axon guidance; P:cell adhesion; F:axon guidance receptor activity; P:homophilic cell adhesion via plasma membrane adhesion molecules; P:chemotaxis; C:integral component of plasma membrane; P:determination of ventral identity; P:n…
AgB02_g245_t01	hypothetical protein Bm1_06235	159	2	2.61481e-16	62.5	2	C:GO:0016020; C:GO:0016021	C:membrane; C:integral component of membrane
AgB02_g246_t04	Zinc finger	440	7	0	64.14	6	F:GO:0003676; F:GO:0003677; C:GO:0005634; F:GO:0046872; C:GO:0016020; C:GO:0016021	F:nucleic acid binding; F:DNA binding; C:nucleus; F:metal ion binding; C:membrane; C:integral component of membrane
AgB02_g247_t01	Histone-lysine N-methyltransferase SUV420H2	61	20	3.45324e-29	77.95	16	P:GO:0006351; P:GO:0006355; F:GO:0008168; C:GO:0005694; C:GO:0005721; C:GO:0005654; C:GO:0005720; F:GO:0042799; C:GO:0005634; C:GO:0000780; F:GO:0005515; P:GO:0016571; F:GO:0018024; P:GO:0034773; F:GO:0016740; P:GO:0032259	P:transcription, DNA-templated; P:regulation of transcription, DNA-templated; F:methyltransferase activity; C:chromosome; C:pericentric heterochromatin; C:nucleoplasm; C:nuclear heterochromatin; F:histone methyltransferase activity (H4-K20 specific); C:nucleus; C:condensed nuclear chromosome, centromeric region; F:protein binding; P:histone methylation; F:histone-lysine N-methyltransferase activi…
AgB02_g248_t02	Histone-lysine N-methyltransferase SUV420H2	285	20	1.21596e-163	68.65	22	P:GO:0016569; P:GO:0006351; P:GO:0034770; P:GO:0009792; P:GO:0008340; P:GO:0006355; F:GO:0008168; C:GO:0005694; C:GO:0005575; F:GO:0003674; C:GO:0005721; C:GO:0005720; C:GO:0005654; F:GO:0042799; C:GO:0005634; C:GO:0000780; F:GO:0005515; P:GO:0016571; F:GO:0018024; P:GO:0034773; F:GO:0016740; P:GO:0032259	P:covalent chromatin modification; P:transcription, DNA-templated; P:histone H4-K20 methylation; P:embryo development ending in birth or egg hatching; P:determination of adult lifespan; P:regulation of transcription, DNA-templated; F:methyltransferase activity; C:chromosome; C:cellular_component; F:molecular_function; C:pericentric heterochromatin; C:nuclear heterochromatin; C:nucleoplasm; F:hist…
AgB02_g249_t11	set domain	743	20	0	50.5	14	F:GO:0008270; P:GO:0006351; P:GO:0006355; F:GO:0008168; C:GO:0005694; C:GO:0005654; C:GO:0005634; F:GO:0005515; P:GO:0034968; F:GO:0046872; P:GO:0016571; F:GO:0018024; F:GO:0016740; P:GO:0032259	F:zinc ion binding; P:transcription, DNA-templated; P:regulation of transcription, DNA-templated; F:methyltransferase activity; C:chromosome; C:nucleoplasm; C:nucleus; F:protein binding; P:histone lysine methylation; F:metal ion binding; P:histone methylation; F:histone-lysine N-methyltransferase activity; F:transferase activity; P:methylation
AgB02_g250_t02	mitochondrial ribosomal L10	245	18	6.63361e-74	50.72	15	P:GO:0009792; P:GO:0042254; C:GO:0005840; C:GO:0005762; P:GO:0006898; C:GO:0005622; P:GO:0000003; P:GO:0040018; P:GO:0006412; P:GO:0008406; F:GO:0003735; C:GO:0030529; P:GO:0002119; C:GO:0005739; P:GO:0032543	P:embryo development ending in birth or egg hatching; P:ribosome biogenesis; C:ribosome; C:mitochondrial large ribosomal subunit; P:receptor-mediated endocytosis; C:intracellular; P:reproduction; P:positive regulation of multicellular organism growth; P:translation; P:gonad development; F:structural constituent of ribosome; C:intracellular ribonucleoprotein complex; P:nematode larval development;…
AgB02_g251_t09	Deoxyhypusine hydroxylase	285	20	0	72.35	16	C:GO:0042406; P:GO:0019915; P:GO:0009792; P:GO:0010171; C:GO:0005783; F:GO:0004497; C:GO:0005575; P:GO:0006898; P:GO:0008612; P:GO:0040018; C:GO:0005789; F:GO:0046872; F:GO:0016491; C:GO:0016020; F:GO:0019135; P:GO:0055114	C:extrinsic component of endoplasmic reticulum membrane; P:lipid storage; P:embryo development ending in birth or egg hatching; P:body morphogenesis; C:endoplasmic reticulum; F:monooxygenase activity; C:cellular_component; P:receptor-mediated endocytosis; P:peptidyl-lysine modification to peptidyl-hypusine; P:positive regulation of multicellular organism growth; C:endoplasmic reticulum membrane; …
AgB02_g252_t07	Ubiquitin carboxyl-terminal hydrolase family	119	2	1.38818e-14	70	3	P:GO:0016579; F:GO:0036459; P:GO:0006511	P:protein deubiquitination; F:thiol-dependent ubiquitinyl hydrolase activity; P:ubiquitin-dependent protein catabolic process
AgB02_g253_t01	7SK snRNA methylphosphate capping enzyme	582	20	0	64.4	17	F:GO:0008173; P:GO:0035562; P:GO:1900087; P:GO:0040011; P:GO:0009792; P:GO:0040031; F:GO:0008168; F:GO:0008757; C:GO:0005575; P:GO:0000003; F:GO:0003723; P:GO:0000122; P:GO:0001510; P:GO:0016073; P:GO:0002119; F:GO:0016740; P:GO:0032259	F:RNA methyltransferase activity; P:negative regulation of chromatin binding; P:positive regulation of G1/S transition of mitotic cell cycle; P:locomotion; P:embryo development ending in birth or egg hatching; P:snRNA modification; F:methyltransferase activity; F:S-adenosylmethionine-dependent methyltransferase activity; C:cellular_component; P:reproduction; F:RNA binding; P:negative regulation o…
AgB02_g254_t04	zinc finger	275	8	7.45496e-27	55.63	1	F:GO:0046872	F:metal ion binding
AgB02_g255_t01	hypothetical protein LOAG_12721	215	8	2.37318e-45	54.88	2	C:GO:0016020; C:GO:0016021	C:membrane; C:integral component of membrane
AgB02_g256_t01	---NA---	145
AgB02_g257_t02	elegans confirmed by transcript evidence	422	8	1.23904e-61	50.88	2	C:GO:0016020; C:GO:0016021	C:membrane; C:integral component of membrane
AgB02_g258_t04	Cadherin domain containing	782	20	0	50.25	6	F:GO:0005509; C:GO:0016020; C:GO:0016021; P:GO:0007155; P:GO:0007156; C:GO:0005886	F:calcium ion binding; C:membrane; C:integral component of membrane; P:cell adhesion; P:homophilic cell adhesion via plasma membrane adhesion molecules; C:plasma membrane
AgB02_g259_t01	---NA---	81
AgB02_g260_t01	---NA---	176
AgB02_g261_t01	EGg Laying defective family member (egl-26)	303	4	9.29542e-48	52.5	8	P:GO:0040025; P:GO:0002119; P:GO:0000902; P:GO:0030163; P:GO:0009792; P:GO:0018991; C:GO:0016324; P:GO:0000003	P:vulval development; P:nematode larval development; P:cell morphogenesis; P:protein catabolic process; P:embryo development ending in birth or egg hatching; P:oviposition; C:apical plasma membrane; P:reproduction
AgB02_g262_t07	---NA---	144
AgB02_g263_t02	Patched family	484	20	2.32921e-125	50.8	12	P:GO:0002119; P:GO:0040011; P:GO:0008340; P:GO:0009792; C:GO:0016020; C:GO:0016021; P:GO:0045138; P:GO:0018996; P:GO:0006897; P:GO:0006810; F:GO:0005215; P:GO:0000003	P:nematode larval development; P:locomotion; P:determination of adult lifespan; P:embryo development ending in birth or egg hatching; C:membrane; C:integral component of membrane; P:nematode male tail tip morphogenesis; P:molting cycle, collagen and cuticulin-based cuticle; P:endocytosis; P:transport; F:transporter activity; P:reproduction
AgB02_g264_t05	PH domain containing	927	20	0	64.45	3	P:GO:0008340; C:GO:0016020; C:GO:0005886	P:determination of adult lifespan; C:membrane; C:plasma membrane
AgB02_g265_t05	elegans ly confirmed by transcript evidence	844	20	0	59.1	9	F:GO:0046872; P:GO:0006914; C:GO:0016020; P:GO:0015031; C:GO:0016021; C:GO:0010008; P:GO:0035556; C:GO:0005765; C:GO:0005622	F:metal ion binding; P:autophagy; C:membrane; P:protein transport; C:integral component of membrane; C:endosome membrane; P:intracellular signal transduction; C:lysosomal membrane; C:intracellular
AgB02_g266_t05	hypothetical protein, conserved	294	3	3.65044e-05	64.67	7	F:GO:0016746; F:GO:0008270; F:GO:0019706; F:GO:0046872; C:GO:0016020; C:GO:0016021; F:GO:0016740	F:transferase activity, transferring acyl groups; F:zinc ion binding; F:protein-cysteine S-palmitoyltransferase activity; F:metal ion binding; C:membrane; C:integral component of membrane; F:transferase activity
AgB02_g267_t02	---NA---	159
AgB02_g268_t01	---NA---	103
AgB02_g269_t02	FCH domain only 2	968	20	0	57.4	15	F:GO:0035091; C:GO:0045202; P:GO:0006897; C:GO:0005886; P:GO:0072583; F:GO:0005546; F:GO:0001786; F:GO:0005515; P:GO:0048268; P:GO:0048488; C:GO:0005905; C:GO:0016020; P:GO:0010324; C:GO:0030136; P:GO:0072659	F:phosphatidylinositol binding; C:synapse; P:endocytosis; C:plasma membrane; P:clathrin-dependent endocytosis; F:phosphatidylinositol-4,5-bisphosphate binding; F:phosphatidylserine binding; F:protein binding; P:clathrin coat assembly; P:synaptic vesicle endocytosis; C:clathrin-coated pit; C:membrane; P:membrane invagination; C:clathrin-coated vesicle; P:protein localization to plasma membrane
AgB02_g270_t03	---NA---	110
AgB02_g271_t02	---NA---	204
AgB02_g272_t01	---NA---	111
AgB02_g273_t02	elegans ly confirmed by transcript evidence	728	7	1.48425e-73	43
AgB02_g274_t01	elegans ly confirmed by transcript evidence	122	10	1.34989e-16	64.9	5	F:GO:0019825; P:GO:0015671; F:GO:0005344; P:GO:0006810; F:GO:0020037	F:oxygen binding; P:oxygen transport; F:oxygen transporter activity; P:transport; F:heme binding
AgB02_g275_t02	elegans confirmed by transcript evidence	892	20	0	71.55	43	P:GO:0007271; P:GO:0040013; P:GO:0040035; P:GO:0015992; P:GO:0015991; F:GO:0015078; P:GO:0040011; P:GO:0009792; P:GO:0043068; C:GO:0005771; P:GO:0007035; P:GO:0040039; C:GO:0070382; C:GO:0000220; P:GO:0051046; P:GO:0006811; P:GO:0001666; P:GO:0002119; P:GO:0050891; P:GO:0006915; C:GO:0016471; C:GO:0031410; C:GO:0033179; P:GO:0018996; P:GO:0015986; P:GO:0030104; P:GO:0016358; P:GO:0040002; P:GO:00…	P:synaptic transmission, cholinergic; P:negative regulation of locomotion; P:hermaphrodite genitalia development; P:proton transport; P:ATP hydrolysis coupled proton transport; F:hydrogen ion transmembrane transporter activity; P:locomotion; P:embryo development ending in birth or egg hatching; P:positive regulation of programmed cell death; C:multivesicular body; P:vacuolar acidification; P:indu…
AgB02_g276_t02	p21 (Cdc42 Rac)-activated kinase 3	643	20	0	83.6	60	P:GO:0008340; P:GO:0007411; P:GO:0007257; P:GO:0007254; P:GO:0023014; P:GO:0040039; C:GO:0030425; P:GO:0000187; P:GO:0007409; F:GO:0048365; C:GO:0005829; P:GO:0010975; F:GO:0031435; P:GO:0061003; P:GO:0050808; P:GO:0008152; F:GO:0004672; F:GO:0004674; P:GO:0060996; C:GO:0005886; P:GO:0060997; F:GO:0004702; F:GO:0005515; P:GO:0032956; F:GO:0046872; P:GO:0048013; F:GO:0004708; P:GO:0071407; P:GO:00…	P:determination of adult lifespan; P:axon guidance; P:activation of JUN kinase activity; P:JNK cascade; P:signal transduction by protein phosphorylation; P:inductive cell migration; C:dendrite; P:activation of MAPK activity; P:axonogenesis; F:Rac GTPase binding; C:cytosol; P:regulation of neuron projection development; F:mitogen-activated protein kinase kinase kinase binding; P:positive regulatio…
AgB02_g277_t01	[imported] - Caenorhabditis elegans	100	9	3.09967e-38	46.67	4	P:GO:0090305; F:GO:0003964; F:GO:0004519; P:GO:0006278	P:nucleic acid phosphodiester bond hydrolysis; F:RNA-directed DNA polymerase activity; F:endonuclease activity; P:RNA-dependent DNA biosynthetic process
AgB02_g278_t01	Ubiquitin carboxyl-terminal hydrolase 7	507	6	7.58607e-26	47.33	1	F:GO:0016787	F:hydrolase activity
AgB02_g279_t03	---NA---	129
AgB02_g280_t01	---NA---	111
AgB02_g281_t01	---NA---	118
AgB02_g282_t01	---NA---	135
AgB02_g283_t01	---NA---	120
AgB02_g284_t01	hypothetical protein LOAG_06159	236	2	8.27221e-51	54.5
AgB02_g285_t01	Eukaryotic translation initiation factor 3 subunit B	182	20	6.19897e-36	64.05	16	C:GO:0033290; P:GO:0006446; P:GO:0006413; C:GO:0005852; P:GO:0006412; F:GO:0000166; F:GO:0003676; F:GO:0003743; C:GO:0005634; P:GO:0001731; F:GO:0005515; F:GO:0003723; C:GO:0005737; C:GO:0016282; C:GO:0005829; F:GO:0031369	C:eukaryotic 48S preinitiation complex; P:regulation of translational initiation; P:translational initiation; C:eukaryotic translation initiation factor 3 complex; P:translation; F:nucleotide binding; F:nucleic acid binding; F:translation initiation factor activity; C:nucleus; P:formation of translation preinitiation complex; F:protein binding; F:RNA binding; C:cytoplasm; C:eukaryotic 43S preinit…
AgB02_g286_t03	Eukaryotic translation initiation factor 3 subunit B	725	20	0	62.2	21	C:GO:0033290; P:GO:0006413; P:GO:0006446; C:GO:0005852; C:GO:0005654; P:GO:0006412; F:GO:0000166; F:GO:0003676; P:GO:0075522; F:GO:0003743; F:GO:0032947; P:GO:0001731; F:GO:0005515; F:GO:0003723; C:GO:0070062; C:GO:0071541; C:GO:0005737; C:GO:0016282; C:GO:0005829; P:GO:0075525; F:GO:0031369	C:eukaryotic 48S preinitiation complex; P:translational initiation; P:regulation of translational initiation; C:eukaryotic translation initiation factor 3 complex; C:nucleoplasm; P:translation; F:nucleotide binding; F:nucleic acid binding; P:IRES-dependent viral translational initiation; F:translation initiation factor activity; F:protein complex scaffold; P:formation of translation preinitiation…
AgB02_g287_t01	---NA---	130
AgB02_g288_t02	annexin B11 isoform A	518	20	0	81.1	11	F:GO:0001786; F:GO:0008429; P:GO:0007052; F:GO:0005509; P:GO:0009792; F:GO:0043395; F:GO:0008201; P:GO:0043652; P:GO:0007126; F:GO:0005545; F:GO:0005544	F:phosphatidylserine binding; F:phosphatidylethanolamine binding; P:mitotic spindle organization; F:calcium ion binding; P:embryo development ending in birth or egg hatching; F:heparan sulfate proteoglycan binding; F:heparin binding; P:engulfment of apoptotic cell; P:meiotic nuclear division; F:1-phosphatidylinositol binding; F:calcium-dependent phospholipid binding
AgB02_g289_t04	---NA---	113
AgB02_g290_t01	---NA---	100
AgB02_g291_t01	hypothetical protein F52E1.9	199	6	4.80446e-23	60.17	4	C:GO:0016020; C:GO:0016021; F:GO:0034597; P:GO:0046856	C:membrane; C:integral component of membrane; F:phosphatidylinositol-4,5-bisphosphate 4-phosphatase activity; P:phosphatidylinositol dephosphorylation
AgB02_g292_t02	---NA---	90
AgB02_g293_t02	Mitochondrial import receptor subunit TOM20	185	20	1.3037e-96	55.45	29	P:GO:0030150; F:GO:0015450; P:GO:0009792; P:GO:0015031; F:GO:0044212; C:GO:0044233; P:GO:0006886; F:GO:0030943; P:GO:0002119; P:GO:0016031; C:GO:0031012; F:GO:0015266; F:GO:0051082; C:GO:0005741; C:GO:0005740; P:GO:0006810; P:GO:0009306; P:GO:0000003; C:GO:0005742; P:GO:0006357; P:GO:0070096; C:GO:0031307; P:GO:0006626; P:GO:0006605; F:GO:0003677; C:GO:0005634; C:GO:0016020; C:GO:0005739; C:GO:00…	P:protein import into mitochondrial matrix; F:P-P-bond-hydrolysis-driven protein transmembrane transporter activity; P:embryo development ending in birth or egg hatching; P:protein transport; F:transcription regulatory region DNA binding; C:ER-mitochondrion membrane contact site; P:intracellular protein transport; F:mitochondrion targeting sequence binding; P:nematode larval development; P:tRNA i…
AgB02_g294_t01	hypothetical protein	435	2	2.5581e-40	55.5
AgB02_g295_t07	elegans confirmed by transcript evidence	704	9	3.16528e-50	54.78	2	C:GO:0005634; C:GO:0000228	C:nucleus; C:nuclear chromosome
AgB02_g296_t01	Arylsulfatase	627	20	0	66.95	12	F:GO:0008270; C:GO:0005737; F:GO:0003824; F:GO:0046872; F:GO:0008484; P:GO:0008152; C:GO:0016020; C:GO:0016021; F:GO:0004065; C:GO:0005576; C:GO:0005578; F:GO:0016787	F:zinc ion binding; C:cytoplasm; F:catalytic activity; F:metal ion binding; F:sulfuric ester hydrolase activity; P:metabolic process; C:membrane; C:integral component of membrane; F:arylsulfatase activity; C:extracellular region; C:proteinaceous extracellular matrix; F:hydrolase activity
AgB02_g297_t04	---NA---	176
AgB02_g298_t01	---NA---	76
AgB02_g299_t01	hypothetical protein LOAG_01349	110	1	1.18545e-05	60
AgB02_g300_t01	---NA---	114
AgB02_g301_t06	N-terminal domain containing	319	20	0	59.9	5	F:GO:0019901; C:GO:0016020; C:GO:0016021; C:GO:0005575; P:GO:0000079	F:protein kinase binding; C:membrane; C:integral component of membrane; C:cellular_component; P:regulation of cyclin-dependent protein serine/threonine kinase activity
AgB02_g302_t01	---NA---	105
AgB02_g303_t07	flavin-containing monooxygenase family	178	20	6.73029e-62	54.55	15	C:GO:0005783; F:GO:0004497; C:GO:0031090; C:GO:0009536; F:GO:0004499; C:GO:0005789; C:GO:0005634; F:GO:0050661; F:GO:0016491; F:GO:0050660; C:GO:0043231; C:GO:0016020; C:GO:0016021; P:GO:0055114; P:GO:0050832	C:endoplasmic reticulum; F:monooxygenase activity; C:organelle membrane; C:plastid; F:N,N-dimethylaniline monooxygenase activity; C:endoplasmic reticulum membrane; C:nucleus; F:NADP binding; F:oxidoreductase activity; F:flavin adenine dinucleotide binding; C:intracellular membrane-bounded organelle; C:membrane; C:integral component of membrane; P:oxidation-reduction process; P:defense response to…
AgB02_g304_t01	flavin containing monooxygenase 5	101	20	8.60473e-39	78.05	16	P:GO:0008150; P:GO:0009792; C:GO:0005783; F:GO:0004497; C:GO:0031090; F:GO:0004499; C:GO:0005789; F:GO:0050661; C:GO:0005737; F:GO:0050660; F:GO:0016491; C:GO:0043231; C:GO:0016020; C:GO:0016021; P:GO:0017144; P:GO:0055114	P:biological_process; P:embryo development ending in birth or egg hatching; C:endoplasmic reticulum; F:monooxygenase activity; C:organelle membrane; F:N,N-dimethylaniline monooxygenase activity; C:endoplasmic reticulum membrane; F:NADP binding; C:cytoplasm; F:flavin adenine dinucleotide binding; F:oxidoreductase activity; C:intracellular membrane-bounded organelle; C:membrane; C:integral componen…
AgB02_g305_t01	Dimethylaniline monooxygenase [N-oxide-forming] 5	177	20	5.36291e-89	70.7	16	P:GO:0009792; C:GO:0005783; F:GO:0004497; C:GO:0005575; C:GO:0031090; F:GO:0004499; C:GO:0005789; F:GO:0050661; C:GO:0005737; F:GO:0050660; F:GO:0016491; C:GO:0043231; C:GO:0016020; C:GO:0016021; P:GO:0017144; P:GO:0055114	P:embryo development ending in birth or egg hatching; C:endoplasmic reticulum; F:monooxygenase activity; C:cellular_component; C:organelle membrane; F:N,N-dimethylaniline monooxygenase activity; C:endoplasmic reticulum membrane; F:NADP binding; C:cytoplasm; F:flavin adenine dinucleotide binding; F:oxidoreductase activity; C:intracellular membrane-bounded organelle; C:membrane; C:integral componen…
AgB02_g306_t01	potassium channel subfamily K member 13	520	20	6.82375e-115	53.7	9	C:GO:0005887; P:GO:0006811; P:GO:0071805; C:GO:0016020; C:GO:0016021; F:GO:0005267; P:GO:0030322; P:GO:0006810; F:GO:0022841	C:integral component of plasma membrane; P:ion transport; P:potassium ion transmembrane transport; C:membrane; C:integral component of membrane; F:potassium channel activity; P:stabilization of membrane potential; P:transport; F:potassium ion leak channel activity
AgB02_g307_t01	cyclin domain-containing	244	20	0	77	7	C:GO:0005634; F:GO:0019901; P:GO:0006355; P:GO:0022008; P:GO:0016310; F:GO:0016301; P:GO:0000079	C:nucleus; F:protein kinase binding; P:regulation of transcription, DNA-templated; P:neurogenesis; P:phosphorylation; F:kinase activity; P:regulation of cyclin-dependent protein serine/threonine kinase activity
AgB02_g308_t02	Malignant T cell-amplified sequence 1	183	20	3.21667e-134	84.4	4	F:GO:0003874; F:GO:0003723; P:GO:0006729; C:GO:0005737	F:6-pyruvoyltetrahydropterin synthase activity; F:RNA binding; P:tetrahydrobiopterin biosynthetic process; C:cytoplasm
AgB02_g309_t02	DDB1- and CUL4-associated factor 5	489	20	0	60	5	P:GO:0008150; C:GO:0005739; F:GO:0003674; C:GO:0080008; P:GO:0016567	P:biological_process; C:mitochondrion; F:molecular_function; C:Cul4-RING E3 ubiquitin ligase complex; P:protein ubiquitination
AgB02_g310_t01	---NA---	114
AgB02_g311_t01	pyruvate carboxylase	260	20	2.03882e-152	73.95	29	F:GO:0009374; P:GO:0008340; P:GO:0044794; C:GO:0005875; F:GO:0000166; F:GO:0005524; F:GO:0004736; F:GO:0003824; C:GO:0005829; F:GO:0016874; P:GO:0006094; P:GO:0008152; F:GO:0004075; C:GO:0005743; C:GO:0005811; F:GO:0031406; F:GO:0003677; P:GO:0010629; P:GO:0019074; P:GO:0006107; F:GO:0005515; P:GO:0006768; P:GO:0044791; F:GO:0046872; C:GO:0005759; C:GO:0005737; C:GO:0005739; P:GO:0006629; P:GO:00…	F:biotin binding; P:determination of adult lifespan; P:positive regulation by host of viral process; C:microtubule associated complex; F:nucleotide binding; F:ATP binding; F:pyruvate carboxylase activity; F:catalytic activity; C:cytosol; F:ligase activity; P:gluconeogenesis; P:metabolic process; F:biotin carboxylase activity; C:mitochondrial inner membrane; C:lipid particle; F:carboxylic acid bin…
AgB02_g312_t03	aminopeptidase N	220	20	8.93777e-115	61	12	F:GO:0008270; P:GO:0043171; C:GO:0005737; P:GO:0006508; C:GO:0016020; C:GO:0016021; F:GO:0070006; F:GO:0042277; F:GO:0004177; C:GO:0005886; F:GO:0008237; F:GO:0016787	F:zinc ion binding; P:peptide catabolic process; C:cytoplasm; P:proteolysis; C:membrane; C:integral component of membrane; F:metalloaminopeptidase activity; F:peptide binding; F:aminopeptidase activity; C:plasma membrane; F:metallopeptidase activity; F:hydrolase activity
AgB02_g313_t03	elegans ly confirmed by transcript evidence	609	20	1.04734e-100	50.7
AgB02_g314_t01	elegans ly confirmed by transcript evidence	126	9	5.58709e-07	49.22
AgB02_g315_t01	---NA---	61
AgB02_g316_t01	elegans ly confirmed by transcript evidence	397	20	0	79.85	14	F:GO:0004672; F:GO:0004693; F:GO:0004674; P:GO:0006468; F:GO:0000166; F:GO:0005524; C:GO:0005634; C:GO:0070062; C:GO:0005737; P:GO:0016310; P:GO:0051726; C:GO:0035869; F:GO:0016740; F:GO:0016301	F:protein kinase activity; F:cyclin-dependent protein serine/threonine kinase activity; F:protein serine/threonine kinase activity; P:protein phosphorylation; F:nucleotide binding; F:ATP binding; C:nucleus; C:extracellular exosome; C:cytoplasm; P:phosphorylation; P:regulation of cell cycle; C:ciliary transition zone; F:transferase activity; F:kinase activity
AgB02_g317_t01	Serine threonine- phosphatase 5	518	20	0	81.85	9	F:GO:0004721; C:GO:0005634; C:GO:0072686; C:GO:0005737; P:GO:0006470; P:GO:0033365; C:GO:0043234; P:GO:0045920; F:GO:0016787	F:phosphoprotein phosphatase activity; C:nucleus; C:mitotic spindle; C:cytoplasm; P:protein dephosphorylation; P:protein localization to organelle; C:protein complex; P:negative regulation of exocytosis; F:hydrolase activity
AgB02_g318_t01	conserve having a signal peptide	433	20	8.82181e-84	48.85	7	C:GO:0043229; F:GO:0016757; F:GO:0035250; P:GO:0006491; C:GO:0016020; C:GO:0016021; F:GO:0016740	C:intracellular organelle; F:transferase activity, transferring glycosyl groups; F:UDP-galactosyltransferase activity; P:N-glycan processing; C:membrane; C:integral component of membrane; F:transferase activity
AgB02_g319_t02	UPF0692 CG33108-like	173	20	2.91635e-64	59.35	5	F:GO:0005524; P:GO:0006508; C:GO:0016021; F:GO:0008233; P:GO:0000003	F:ATP binding; P:proteolysis; C:integral component of membrane; F:peptidase activity; P:reproduction
AgB02_g320_t02	---NA---	366
AgB02_g321_t04	Protein SPEC3	242	20	1.11193e-157	73.3	2	C:GO:0016020; C:GO:0016021	C:membrane; C:integral component of membrane
AgB02_g322_t01	hypothetical protein Bm1_15960	394	2	1.09871e-24	55.5
AgB02_g323_t01	Clathrin light chain	239	20	7.725e-106	55.1	8	P:GO:0072583; F:GO:0032050; P:GO:0016192; C:GO:0030130; C:GO:0030132; F:GO:0005198; C:GO:0030125; P:GO:0006886	P:clathrin-dependent endocytosis; F:clathrin heavy chain binding; P:vesicle-mediated transport; C:clathrin coat of trans-Golgi network vesicle; C:clathrin coat of coated pit; F:structural molecule activity; C:clathrin vesicle coat; P:intracellular protein transport
AgB02_g324_t06	---NA---	132
AgB02_g325_t01	Spartin	186	20	1.6503e-66	51.5	18	P:GO:0050905; C:GO:0005780; C:GO:0045202; C:GO:0005741; C:GO:0005886; P:GO:0060612; P:GO:0030514; C:GO:0005811; P:GO:0051301; P:GO:0009838; F:GO:0005515; F:GO:0031625; P:GO:0048698; C:GO:0005737; P:GO:0051881; P:GO:0045033; P:GO:0034389; C:GO:0030496	P:neuromuscular process; C:extrinsic component of intraperoxisomal membrane; C:synapse; C:mitochondrial outer membrane; C:plasma membrane; P:adipose tissue development; P:negative regulation of BMP signaling pathway; C:lipid particle; P:cell division; P:abscission; F:protein binding; F:ubiquitin protein ligase binding; P:negative regulation of collateral sprouting in absence of injury; C:cytoplas…
AgB02_g326_t01	acyltransferase 3	216	20	2.95703e-142	62.65	6	F:GO:0016746; F:GO:0016747; P:GO:0033692; C:GO:0016020; C:GO:0016021; F:GO:0016740	F:transferase activity, transferring acyl groups; F:transferase activity, transferring acyl groups other than amino-acyl groups; P:cellular polysaccharide biosynthetic process; C:membrane; C:integral component of membrane; F:transferase activity
AgB02_g327_t01	O-acetyltransferase oatA	172	20	3.52297e-81	69.7	7	F:GO:0016746; F:GO:0016747; P:GO:0002009; P:GO:0033692; C:GO:0016020; C:GO:0016021; F:GO:0016740	F:transferase activity, transferring acyl groups; F:transferase activity, transferring acyl groups other than amino-acyl groups; P:morphogenesis of an epithelium; P:cellular polysaccharide biosynthetic process; C:membrane; C:integral component of membrane; F:transferase activity
AgB02_g328_t06	acyltransferase 3	367	20	0	52.45	6	F:GO:0016746; F:GO:0016747; P:GO:0033692; C:GO:0016020; C:GO:0016021; F:GO:0016740	F:transferase activity, transferring acyl groups; F:transferase activity, transferring acyl groups other than amino-acyl groups; P:cellular polysaccharide biosynthetic process; C:membrane; C:integral component of membrane; F:transferase activity
AgB02_g329_t01	spastic paraplegia spartin (Troyer syndrome) homolog (human)	474	20	0	58.45	19	P:GO:0050905; C:GO:0005780; P:GO:0000910; C:GO:0045202; C:GO:0005741; C:GO:0005886; P:GO:0060612; P:GO:0030514; C:GO:0005811; P:GO:0051301; P:GO:0009838; F:GO:0005515; F:GO:0031625; P:GO:0048698; C:GO:0005737; P:GO:0051881; P:GO:0045033; P:GO:0034389; C:GO:0030496	P:neuromuscular process; C:extrinsic component of intraperoxisomal membrane; P:cytokinesis; C:synapse; C:mitochondrial outer membrane; C:plasma membrane; P:adipose tissue development; P:negative regulation of BMP signaling pathway; C:lipid particle; P:cell division; P:abscission; F:protein binding; F:ubiquitin protein ligase binding; P:negative regulation of collateral sprouting in absence of inj…
AgB02_g330_t03	Neutral alpha-glucosidase AB	340	20	0	74.15	15	P:GO:0009792; P:GO:0008152; P:GO:0005980; F:GO:0004553; C:GO:0005575; C:GO:0005764; P:GO:0005975; F:GO:0004558; F:GO:0003824; P:GO:0002119; C:GO:0016020; C:GO:0016021; F:GO:0030246; F:GO:0016787; F:GO:0016798	P:embryo development ending in birth or egg hatching; P:metabolic process; P:glycogen catabolic process; F:hydrolase activity, hydrolyzing O-glycosyl compounds; C:cellular_component; C:lysosome; P:carbohydrate metabolic process; F:alpha-1,4-glucosidase activity; F:catalytic activity; P:nematode larval development; C:membrane; C:integral component of membrane; F:carbohydrate binding; F:hydrolase a…
AgB02_g331_t01	Histone H3	160	20	3.59971e-87	70.1	12	F:GO:0003677; C:GO:0005634; P:GO:0060465; P:GO:0002119; F:GO:0046982; P:GO:0040011; P:GO:0009792; P:GO:0010171; P:GO:0008356; C:GO:0005694; C:GO:0000786; P:GO:0000003	F:DNA binding; C:nucleus; P:pharynx development; P:nematode larval development; F:protein heterodimerization activity; P:locomotion; P:embryo development ending in birth or egg hatching; P:body morphogenesis; P:asymmetric cell division; C:chromosome; C:nucleosome; P:reproduction
AgB02_g332_t01	short chain dehydrogenase reductase family	332	20	0	63.2	8	F:GO:0003677; C:GO:0005634; F:GO:0003899; P:GO:0006351; F:GO:0016491; C:GO:0016020; C:GO:0016021; P:GO:0055114	F:DNA binding; C:nucleus; F:DNA-directed 5'-3' RNA polymerase activity; P:transcription, DNA-templated; F:oxidoreductase activity; C:membrane; C:integral component of membrane; P:oxidation-reduction process
AgB02_g333_t01	---NA---	182
AgB02_g334_t03	Formin Homology 2 Domain containing	169	20	1.0716e-85	65.2	22	P:GO:0060298; C:GO:0016528; P:GO:0016319; P:GO:0035152; P:GO:0051491; P:GO:0007411; P:GO:0007424; P:GO:0051489; C:GO:0030018; C:GO:0005865; F:GO:0003779; C:GO:0044295; P:GO:0050770; P:GO:0048675; P:GO:0030838; C:GO:0016020; P:GO:0016043; C:GO:0016021; P:GO:0071689; F:GO:0017048; P:GO:0030036; P:GO:0051017	P:positive regulation of sarcomere organization; C:sarcoplasm; P:mushroom body development; P:regulation of tube architecture, open tracheal system; P:positive regulation of filopodium assembly; P:axon guidance; P:open tracheal system development; P:regulation of filopodium assembly; C:Z disc; C:striated muscle thin filament; F:actin binding; C:axonal growth cone; P:regulation of axonogenesis; P:…
AgB02_g335_t03	Disheveled-associated activator of morphogenesis 1	596	20	0	55.25	8	P:GO:0048793; F:GO:0003779; C:GO:0016020; P:GO:0016043; C:GO:0016021; P:GO:0021986; F:GO:0017048; P:GO:0030036	P:pronephros development; F:actin binding; C:membrane; P:cellular component organization; C:integral component of membrane; P:habenula development; F:Rho GTPase binding; P:actin cytoskeleton organization
AgB02_g336_t02	poly(ADP-ribose) polymerase	375	20	0	73.45	89	P:GO:0043504; P:GO:0006281; P:GO:0036211; P:GO:0006284; P:GO:0016925; P:GO:2001170; P:GO:0023019; P:GO:0007179; P:GO:0006366; C:GO:0005667; P:GO:2000679; F:GO:0051287; P:GO:0071451; F:GO:1990404; P:GO:1990966; P:GO:0010613; P:GO:0030225; P:GO:1900182; F:GO:0019901; F:GO:0016757; F:GO:0008270; P:GO:1905077; P:GO:0010990; F:GO:0042826; P:GO:0006295; P:GO:0006296; P:GO:0006293; P:GO:0032042; P:GO:19…	P:mitochondrial DNA repair; P:DNA repair; P:protein modification process; P:base-excision repair; P:protein sumoylation; P:negative regulation of ATP biosynthetic process; P:signal transduction involved in regulation of gene expression; P:transforming growth factor beta receptor signaling pathway; P:transcription from RNA polymerase II promoter; C:transcription factor complex; P:positive regulati…
AgB02_g337_t05	WGR domain containing	140	20	2.23228e-92	62.25	39	P:GO:0043504; P:GO:0006281; P:GO:0036211; P:GO:0008340; C:GO:0005730; F:GO:0003950; P:GO:0006302; P:GO:0051103; P:GO:0032869; C:GO:0005667; F:GO:0051287; F:GO:0019901; F:GO:0008270; F:GO:0016757; F:GO:0042802; P:GO:0006471; P:GO:0006273; P:GO:0032042; F:GO:0008134; C:GO:0043234; P:GO:0006974; P:GO:0007005; C:GO:0000784; F:GO:0003723; C:GO:0005635; F:GO:0003677; C:GO:0005634; P:GO:1903827; F:GO:00…	P:mitochondrial DNA repair; P:DNA repair; P:protein modification process; P:determination of adult lifespan; C:nucleolus; F:NAD+ ADP-ribosyltransferase activity; P:double-strand break repair; P:DNA ligation involved in DNA repair; P:cellular response to insulin stimulus; C:transcription factor complex; F:NAD binding; F:protein kinase binding; F:zinc ion binding; F:transferase activity, transferri…
AgB02_g338_t01	hypothetical protein LOAG_06166	118	2	2.08121e-23	76.5
AgB02_g339_t05	WD repeat and HMG-box DNA-binding 1	852	20	0	49.5	16	P:GO:0033044; P:GO:0070829; P:GO:0009792; P:GO:0006261; P:GO:0006396; F:GO:0003682; C:GO:0000775; C:GO:0005654; F:GO:0070063; F:GO:0003677; C:GO:0005634; F:GO:0005515; F:GO:0003723; C:GO:0005737; P:GO:0045132; C:GO:0031298	P:regulation of chromosome organization; P:heterochromatin maintenance; P:embryo development ending in birth or egg hatching; P:DNA-dependent DNA replication; P:RNA processing; F:chromatin binding; C:chromosome, centromeric region; C:nucleoplasm; F:RNA polymerase binding; F:DNA binding; C:nucleus; F:protein binding; F:RNA binding; C:cytoplasm; P:meiotic chromosome segregation; C:replication fork …
AgB02_g340_t03	Homolog of Odr-2(Two) family member (hot-6)	229	5	1.9958e-41	51	4	C:GO:0016020; C:GO:0016021; P:GO:0007178; F:GO:0004675	C:membrane; C:integral component of membrane; P:transmembrane receptor protein serine/threonine kinase signaling pathway; F:transmembrane receptor protein serine/threonine kinase activity
AgB02_g341_t01	Ornithine decarboxylase	401	20	0	65.65	13	F:GO:0042803; P:GO:0008284; P:GO:0042176; F:GO:0016829; P:GO:0006596; F:GO:0004586; P:GO:0009615; C:GO:0005737; F:GO:0003824; P:GO:0001822; C:GO:0005829; P:GO:0033387; F:GO:0016831	F:protein homodimerization activity; P:positive regulation of cell proliferation; P:regulation of protein catabolic process; F:lyase activity; P:polyamine biosynthetic process; F:ornithine decarboxylase activity; P:response to virus; C:cytoplasm; F:catalytic activity; P:kidney development; C:cytosol; P:putrescine biosynthetic process from ornithine; F:carboxy-lyase activity
AgB02_g342_t03	39S ribosomal mitochondrial	320	20	0	56.45	12	F:GO:0000166; F:GO:0016876; P:GO:0006418; F:GO:0003723; F:GO:0004827; C:GO:0005739; C:GO:0016020; C:GO:0016021; C:GO:0005840; P:GO:0006810; P:GO:0006433; P:GO:0000002	F:nucleotide binding; F:ligase activity, forming aminoacyl-tRNA and related compounds; P:tRNA aminoacylation for protein translation; F:RNA binding; F:proline-tRNA ligase activity; C:mitochondrion; C:membrane; C:integral component of membrane; C:ribosome; P:transport; P:prolyl-tRNA aminoacylation; P:mitochondrial genome maintenance
AgB02_g343_t03	Chondroitin proteoglycan 4	356	18	0	48.61	1	P:GO:0009792	P:embryo development ending in birth or egg hatching
AgB02_g344_t05	Bardet-Biedl syndrome 2 homolog	236	20	2.11651e-94	65.1	48	P:GO:0040015; P:GO:1903441; P:GO:0030030; P:GO:0015031; P:GO:0008104; P:GO:0043001; P:GO:0048854; P:GO:0045444; P:GO:0042311; P:GO:0021756; C:GO:0042995; P:GO:0040018; F:GO:0001103; C:GO:0031514; C:GO:0005902; P:GO:0045494; P:GO:0070121; C:GO:0005929; C:GO:0060170; C:GO:0032420; P:GO:0038108; P:GO:0032402; C:GO:0034464; P:GO:0033210; P:GO:0060271; C:GO:0036064; P:GO:0046907; P:GO:0060296; P:GO:19…	P:negative regulation of multicellular organism growth; P:protein localization to ciliary membrane; P:cell projection organization; P:protein transport; P:protein localization; P:Golgi to plasma membrane protein transport; P:brain morphogenesis; P:fat cell differentiation; P:vasodilation; P:striatum development; C:cell projection; P:positive regulation of multicellular organism growth; F:RNA poly…
AgB02_g345_t04	MGC53320 protein	110	2	8.18732e-09	49.5
AgB02_g346_t02	---NA---	83
AgB02_g347_t01	---NA---	98
AgB02_g348_t01	---NA---	82
AgB02_g349_t02	ankyrin repeat domain-containing 40-like	511	20	1.30361e-49	56.45	3	C:GO:0016020; C:GO:0016021; C:GO:0005863	C:membrane; C:integral component of membrane; C:striated muscle myosin thick filament
AgB02_g350_t01	---NA---	72
AgB02_g351_t02	phospholipase plb1	429	20	1.00658e-135	49.4	6	F:GO:0016788; P:GO:0006629; C:GO:0016020; C:GO:0016021; P:GO:2000344; F:GO:0016298	F:hydrolase activity, acting on ester bonds; P:lipid metabolic process; C:membrane; C:integral component of membrane; P:positive regulation of acrosome reaction; F:lipase activity
AgB02_g352_t01	lipocalin cytosolic fatty-acid binding family	138	20	5.66156e-97	66.15	11	C:GO:0005634; P:GO:0019915; F:GO:0005504; C:GO:0048471; P:GO:0040011; P:GO:0006914; P:GO:0008340; P:GO:0010467; F:GO:0008289; P:GO:0006810; F:GO:0005215	C:nucleus; P:lipid storage; F:fatty acid binding; C:perinuclear region of cytoplasm; P:locomotion; P:autophagy; P:determination of adult lifespan; P:gene expression; F:lipid binding; P:transport; F:transporter activity
AgB02_g353_t02	Pyruvate dehydrogenase E1 component subunit beta	170	20	3.62937e-114	82.1	11	P:GO:0006086; C:GO:0005759; F:GO:0003824; F:GO:0016491; F:GO:0004739; P:GO:0008340; P:GO:0009792; P:GO:0008152; C:GO:0005739; P:GO:0006096; P:GO:0055114	P:acetyl-CoA biosynthetic process from pyruvate; C:mitochondrial matrix; F:catalytic activity; F:oxidoreductase activity; F:pyruvate dehydrogenase (acetyl-transferring) activity; P:determination of adult lifespan; P:embryo development ending in birth or egg hatching; P:metabolic process; C:mitochondrion; P:glycolytic process; P:oxidation-reduction process
AgB02_g354_t01	elegans ly confirmed by transcript evidence	289	4	8.09445e-06	48
AgB02_g355_t01	elegans ly confirmed by transcript evidence	839	20	2.73936e-121	58	2	C:GO:0016020; C:GO:0016021	C:membrane; C:integral component of membrane
AgB02_g356_t06	F-box only 11	297	20	0	71.15	28	P:GO:0040034; P:GO:0040011; P:GO:0007275; P:GO:0009792; P:GO:0006464; C:GO:0005694; C:GO:0005730; P:GO:0007605; P:GO:0002119; P:GO:0006915; F:GO:0016274; P:GO:0018991; P:GO:0018996; F:GO:0008270; P:GO:0008078; P:GO:0040007; P:GO:0000003; P:GO:0006511; C:GO:0005634; F:GO:0004842; F:GO:0005515; P:GO:0008406; C:GO:0000151; F:GO:0046872; C:GO:0005737; P:GO:0043065; P:GO:0035246; P:GO:0016567	P:regulation of development, heterochronic; P:locomotion; P:multicellular organism development; P:embryo development ending in birth or egg hatching; P:cellular protein modification process; C:chromosome; C:nucleolus; P:sensory perception of sound; P:nematode larval development; P:apoptotic process; F:protein-arginine N-methyltransferase activity; P:oviposition; P:molting cycle, collagen and cuti…
AgB02_g357_t03	---NA---	300
AgB02_g358_t03	---NA---	111
AgB02_g359_t04	Fasciculation and elongation zeta-2	299	20	0	76.85	17	P:GO:0050807; F:GO:0019905; P:GO:0007165; P:GO:0040011; F:GO:0005198; P:GO:0007411; C:GO:0043025; F:GO:0004871; P:GO:0007413; P:GO:0030516; F:GO:0005515; C:GO:0048471; C:GO:0005737; P:GO:0048675; F:GO:0019894; F:GO:0030674; C:GO:0030424	P:regulation of synapse organization; F:syntaxin binding; P:signal transduction; P:locomotion; F:structural molecule activity; P:axon guidance; C:neuronal cell body; F:signal transducer activity; P:axonal fasciculation; P:regulation of axon extension; F:protein binding; C:perinuclear region of cytoplasm; C:cytoplasm; P:axon extension; F:kinesin binding; F:protein binding, bridging; C:axon
AgB02_g360_t05	O-sialoglyco endopeptidase-like 1	381	20	0	59.45	14	F:GO:0016746; F:GO:0016747; P:GO:0008033; C:GO:0000408; F:GO:0008233; F:GO:0004222; F:GO:0061711; F:GO:0046872; C:GO:0005739; P:GO:0006508; C:GO:0016020; C:GO:0016021; P:GO:0002949; F:GO:0016740	F:transferase activity, transferring acyl groups; F:transferase activity, transferring acyl groups other than amino-acyl groups; P:tRNA processing; C:EKC/KEOPS complex; F:peptidase activity; F:metalloendopeptidase activity; F:N(6)-L-threonylcarbamoyladenine synthase; F:metal ion binding; C:mitochondrion; P:proteolysis; C:membrane; C:integral component of membrane; P:tRNA threonylcarbamoyladenosin…
AgB02_g361_t03	Splicing arginine serine-rich 4	266	20	1.06751e-74	69.95	18	P:GO:0008380; C:GO:0016607; P:GO:0006397; P:GO:0006369; P:GO:0002244; P:GO:0000398; F:GO:0003723; C:GO:0005654; F:GO:0000166; P:GO:0000375; P:GO:0006406; F:GO:0003676; C:GO:0005634; F:GO:0003723; P:GO:0006405; P:GO:0048025; P:GO:0031124; F:GO:1990825	P:RNA splicing; C:nuclear speck; P:mRNA processing; P:termination of RNA polymerase II transcription; P:hematopoietic progenitor cell differentiation; P:mRNA splicing, via spliceosome; F:RNA binding; C:nucleoplasm; F:nucleotide binding; P:RNA splicing, via transesterification reactions; P:mRNA export from nucleus; F:nucleic acid binding; C:nucleus; F:RNA binding; P:RNA export from nucleus; P:nega…
AgB02_g362_t01	elegans confirmed by transcript evidence	282	19	3.55717e-59	46.05	1	C:GO:0005576	C:extracellular region
AgB02_g363_t02	hypothetical protein LOAG_12726	566	2	1.19482e-06	39.5
AgB02_g364_t01	reverse transcriptase	200	20	2.73398e-23	56	2	F:GO:0003964; P:GO:0006278	F:RNA-directed DNA polymerase activity; P:RNA-dependent DNA biosynthetic process
AgB02_g365_t06	phospholipase D3	311	20	0	61.4	8	F:GO:0003824; C:GO:0016020; P:GO:0006629; P:GO:0016042; C:GO:0016021; F:GO:0004630; F:GO:0070290; F:GO:0016787	F:catalytic activity; C:membrane; P:lipid metabolic process; P:lipid catabolic process; C:integral component of membrane; F:phospholipase D activity; F:N-acylphosphatidylethanolamine-specific phospholipase D activity; F:hydrolase activity
AgB02_g366_t06	elegans ly confirmed by transcript evidence	1078	20	0	66.1	21	P:GO:0010172; P:GO:0007411; C:GO:0005783; C:GO:0005576; F:GO:0005201; F:GO:0020037; P:GO:0042744; F:GO:0004601; P:GO:0006979; P:GO:0048681; C:GO:0005615; C:GO:0005604; C:GO:0070062; F:GO:0046872; F:GO:0016491; P:GO:0030198; P:GO:0098869; P:GO:0071711; P:GO:0055114; C:GO:0031012; P:GO:0016203	P:embryonic body morphogenesis; P:axon guidance; C:endoplasmic reticulum; C:extracellular region; F:extracellular matrix structural constituent; F:heme binding; P:hydrogen peroxide catabolic process; F:peroxidase activity; P:response to oxidative stress; P:negative regulation of axon regeneration; C:extracellular space; C:basement membrane; C:extracellular exosome; F:metal ion binding; F:oxidored…
AgB02_g367_t01	periodic tryptophan 2	313	20	3.34687e-37	49.5	12	C:GO:0032040; P:GO:0000462; P:GO:0000472; F:GO:0030515; C:GO:0005737; P:GO:0000480; C:GO:0005829; P:GO:0030010; P:GO:0000447; C:GO:0034388; C:GO:0005730; C:GO:0030686	C:small-subunit processome; P:maturation of SSU-rRNA from tricistronic rRNA transcript (SSU-rRNA, 5.8S rRNA, LSU-rRNA); P:endonucleolytic cleavage to generate mature 5'-end of SSU-rRNA from (SSU-rRNA, 5.8S rRNA, LSU-rRNA); F:snoRNA binding; C:cytoplasm; P:endonucleolytic cleavage in 5'-ETS of tricistronic rRNA transcript (SSU-rRNA, 5.8S rRNA, LSU-rRNA); C:cytosol; P:establishment of cell polarity…
AgB02_g368_t04	pinin SDK memA conserved region containing	403	18	1.59371e-91	48.22	9	C:GO:0035145; C:GO:0005911; P:GO:0014033; C:GO:0071013; C:GO:0016020; P:GO:0007155; C:GO:0030424; C:GO:0005654; F:GO:0003723	C:exon-exon junction complex; C:cell-cell junction; P:neural crest cell differentiation; C:catalytic step 2 spliceosome; C:membrane; P:cell adhesion; C:axon; C:nucleoplasm; F:RNA binding
AgB02_g369_t03	elegans ly confirmed by transcript evidence	242	20	1.88136e-115	75.55	28	C:GO:0032590; F:GO:0005251; F:GO:0022843; C:GO:0032809; F:GO:0004222; P:GO:0006813; F:GO:0005249; P:GO:0006811; P:GO:0034765; F:GO:0008270; P:GO:0071804; P:GO:0071805; P:GO:0055085; C:GO:0008076; P:GO:0030163; P:GO:0034220; P:GO:0051260; F:GO:0005244; F:GO:0005267; P:GO:0006810; C:GO:0005886; F:GO:0008237; F:GO:0005216; C:GO:0016020; P:GO:0006508; C:GO:0016021; C:GO:0030673; P:GO:0030431	C:dendrite membrane; F:delayed rectifier potassium channel activity; F:voltage-gated cation channel activity; C:neuronal cell body membrane; F:metalloendopeptidase activity; P:potassium ion transport; F:voltage-gated potassium channel activity; P:ion transport; P:regulation of ion transmembrane transport; F:zinc ion binding; P:cellular potassium ion transport; P:potassium ion transmembrane transp…
AgB02_g370_t01	voltage-gated potassium channel	136	20	2.39198e-16	69.45	21	F:GO:0008270; P:GO:0055085; P:GO:0071805; F:GO:0005251; C:GO:0008076; P:GO:0030163; P:GO:0034220; P:GO:0051260; F:GO:0005244; F:GO:0005267; F:GO:0004222; P:GO:0006810; F:GO:0008237; P:GO:0006813; F:GO:0005216; F:GO:0005249; P:GO:0006811; C:GO:0016020; P:GO:0006508; C:GO:0016021; P:GO:0034765	F:zinc ion binding; P:transmembrane transport; P:potassium ion transmembrane transport; F:delayed rectifier potassium channel activity; C:voltage-gated potassium channel complex; P:protein catabolic process; P:ion transmembrane transport; P:protein homooligomerization; F:voltage-gated ion channel activity; F:potassium channel activity; F:metalloendopeptidase activity; P:transport; F:metallopeptid…
AgB02_g371_t01	elegans confirmed by transcript evidence	145	20	2.84144e-69	67.05	22	C:GO:0032590; P:GO:0071804; P:GO:0071805; P:GO:0055085; C:GO:0008076; F:GO:0005251; P:GO:0051260; C:GO:0032809; F:GO:0005244; F:GO:0005267; P:GO:0006810; F:GO:0004114; P:GO:0006813; F:GO:0005249; F:GO:0005216; P:GO:0006811; F:GO:0046872; C:GO:0016020; C:GO:0016021; P:GO:0034765; C:GO:0030673; F:GO:0016787	C:dendrite membrane; P:cellular potassium ion transport; P:potassium ion transmembrane transport; P:transmembrane transport; C:voltage-gated potassium channel complex; F:delayed rectifier potassium channel activity; P:protein homooligomerization; C:neuronal cell body membrane; F:voltage-gated ion channel activity; F:potassium channel activity; P:transport; F:3',5'-cyclic-nucleotide phosphodiester…
AgB02_g372_t01	potassium voltage-gated channel Shaw	185	20	2.02028e-82	89.6	24	C:GO:0032590; P:GO:0071804; P:GO:0071805; P:GO:0055085; C:GO:0008076; F:GO:0005251; P:GO:0051260; F:GO:0022843; C:GO:0032809; F:GO:0005244; F:GO:0005267; P:GO:0006810; C:GO:0005886; F:GO:0004114; P:GO:0006813; F:GO:0005216; F:GO:0005249; P:GO:0006811; C:GO:0016020; C:GO:0016021; P:GO:0034765; C:GO:0030673; P:GO:0030431; F:GO:0016787	C:dendrite membrane; P:cellular potassium ion transport; P:potassium ion transmembrane transport; P:transmembrane transport; C:voltage-gated potassium channel complex; F:delayed rectifier potassium channel activity; P:protein homooligomerization; F:voltage-gated cation channel activity; C:neuronal cell body membrane; F:voltage-gated ion channel activity; F:potassium channel activity; P:transport;…
AgB02_g373_t02	elegans confirmed by transcript evidence	145	4	7.45342e-15	49.25
AgB02_g374_t01	hypothetical protein Bm1_17715	599	7	2.29127e-21	45.29
AgB02_g375_t02	---NA---	116
AgB02_g376_t01	hypothetical protein LOAG_13875	163	1	2.46034e-14	53
AgB02_g377_t01	---NA---	182
AgB02_g378_t03	phosphomevalonate kinase	197	20	3.18535e-65	63.2	25	P:GO:0009792; P:GO:0008203; P:GO:0008202; F:GO:0000166; F:GO:0005524; C:GO:0070062; P:GO:0019287; P:GO:0006915; C:GO:0005829; P:GO:0016310; P:GO:0018996; P:GO:0070723; P:GO:0006695; P:GO:0008299; P:GO:0006694; P:GO:0000003; F:GO:0004631; C:GO:0005777; P:GO:0048477; C:GO:0005737; C:GO:0016020; P:GO:0006629; F:GO:0016740; F:GO:0016301; P:GO:0016126	P:embryo development ending in birth or egg hatching; P:cholesterol metabolic process; P:steroid metabolic process; F:nucleotide binding; F:ATP binding; C:extracellular exosome; P:isopentenyl diphosphate biosynthetic process, mevalonate pathway; P:apoptotic process; C:cytosol; P:phosphorylation; P:molting cycle, collagen and cuticulin-based cuticle; P:response to cholesterol; P:cholesterol biosyn…
AgB02_g379_t02	---NA---	85
AgB02_g380_t01	Zinc C2H2 type family	479	20	1.49979e-70	56.2	5	F:GO:0003676; C:GO:0005634; F:GO:0008270; F:GO:0046872; P:GO:0032481	F:nucleic acid binding; C:nucleus; F:zinc ion binding; F:metal ion binding; P:positive regulation of type I interferon production
AgB02_g381_t01	briggsae CBR-NLP-42	137	4	9.37242e-07	62.25	1	P:GO:0007218	P:neuropeptide signaling pathway
AgB02_g382_t05	Intron-binding aquarius	1424	20	0	74.15	15	P:GO:0008380; P:GO:0040011; P:GO:0009792; P:GO:0010171; P:GO:0006283; C:GO:0005681; P:GO:0006397; P:GO:0000398; F:GO:0003723; C:GO:0005654; C:GO:0005634; F:GO:0005515; F:GO:0003723; C:GO:0071013; C:GO:0016020	P:RNA splicing; P:locomotion; P:embryo development ending in birth or egg hatching; P:body morphogenesis; P:transcription-coupled nucleotide-excision repair; C:spliceosomal complex; P:mRNA processing; P:mRNA splicing, via spliceosome; F:RNA binding; C:nucleoplasm; C:nucleus; F:protein binding; F:RNA binding; C:catalytic step 2 spliceosome; C:membrane
AgB02_g383_t01	Ankyrin repeat and SOCS box 3	613	20	0	52.25	10	P:GO:0008150; F:GO:0004842; C:GO:0005634; F:GO:0005515; F:GO:0031625; C:GO:0000151; C:GO:0005737; P:GO:0035556; C:GO:0005622; P:GO:0016567	P:biological_process; F:ubiquitin-protein transferase activity; C:nucleus; F:protein binding; F:ubiquitin protein ligase binding; C:ubiquitin ligase complex; C:cytoplasm; P:intracellular signal transduction; C:intracellular; P:protein ubiquitination
AgB02_g384_t01	TPR Domain containing	1171	20	6.1811e-86	42.65	3	C:GO:0055087; C:GO:0035327; C:GO:0005654	C:Ski complex; C:transcriptionally active chromatin; C:nucleoplasm
AgB02_g385_t03	Metallo ase inhibitor tag-225	203	20	8.15755e-126	52.55	15	P:GO:0034097; P:GO:0010033; F:GO:0002020; C:GO:0005576; P:GO:0009725; C:GO:0005578; F:GO:0030414; C:GO:0005615; P:GO:0043086; F:GO:0004857; P:GO:0051045; F:GO:0046872; P:GO:0010951; F:GO:0008191; P:GO:0010466	P:response to cytokine; P:response to organic substance; F:protease binding; C:extracellular region; P:response to hormone; C:proteinaceous extracellular matrix; F:peptidase inhibitor activity; C:extracellular space; P:negative regulation of catalytic activity; F:enzyme inhibitor activity; P:negative regulation of membrane protein ectodomain proteolysis; F:metal ion binding; P:negative regulation…
AgB02_g386_t01	cysteine protease inhibitor	99	20	4.8033e-62	73.25	7	F:GO:0030414; F:GO:0004869; P:GO:0006508; P:GO:0010951; F:GO:0008233; P:GO:0010466; P:GO:0000003	F:peptidase inhibitor activity; F:cysteine-type endopeptidase inhibitor activity; P:proteolysis; P:negative regulation of endopeptidase activity; F:peptidase activity; P:negative regulation of peptidase activity; P:reproduction
AgB02_g387_t01	---NA---	86
AgB02_g388_t01	cathepsin F	406	20	9.44589e-159	64.35	12	F:GO:0030414; C:GO:0005615; F:GO:0004869; P:GO:0006508; F:GO:0004197; P:GO:0010951; F:GO:0008234; F:GO:0008233; P:GO:0051603; P:GO:0010466; C:GO:0005764; F:GO:0016787	F:peptidase inhibitor activity; C:extracellular space; F:cysteine-type endopeptidase inhibitor activity; P:proteolysis; F:cysteine-type endopeptidase activity; P:negative regulation of endopeptidase activity; F:cysteine-type peptidase activity; F:peptidase activity; P:proteolysis involved in cellular protein catabolic process; P:negative regulation of peptidase activity; C:lysosome; F:hydrolase a…
AgB02_g389_t01	---NA---	87
AgB02_g390_t01	---NA---	100
AgB02_g391_t01	---NA---	109
AgB02_g392_t01	---NA---	102
AgB02_g393_t04	hypothetical protein LOAG_12777	255	7	5.15314e-29	52
AgB02_g394_t01	---NA---	109
AgB02_g395_t02	---NA---	59
AgB02_g396_t01	---NA---	80
AgB02_g397_t01	MEChanosensory abnormality family member (mec-1)	609	20	0	55.7	8	P:GO:0007638; F:GO:0004867; P:GO:0043062; P:GO:0043053; F:GO:0005509; P:GO:0010951; C:GO:0005576; P:GO:0009612	P:mechanosensory behavior; F:serine-type endopeptidase inhibitor activity; P:extracellular structure organization; P:dauer entry; F:calcium ion binding; P:negative regulation of endopeptidase activity; C:extracellular region; P:response to mechanical stimulus
AgB02_g398_t01	---NA---	157
AgB02_g399_t01	Cytochrome P450 4V2	509	20	0	60.75	10	F:GO:0005506; F:GO:0016491; F:GO:0046872; F:GO:0016705; C:GO:0016020; C:GO:0016021; P:GO:0055114; F:GO:0004497; P:GO:0050830; F:GO:0020037	F:iron ion binding; F:oxidoreductase activity; F:metal ion binding; F:oxidoreductase activity, acting on paired donors, with incorporation or reduction of molecular oxygen; C:membrane; C:integral component of membrane; P:oxidation-reduction process; F:monooxygenase activity; P:defense response to Gram-positive bacterium; F:heme binding
AgB02_g400_t03	Per1-like family	375	20	0	57.05	3	C:GO:0016020; C:GO:0016021; C:GO:0005794	C:membrane; C:integral component of membrane; C:Golgi apparatus
AgB02_g401_t03	---NA---	313
AgB02_g402_t03	Cuticle collagen 10	283	1	5.94384e-10	52	4	C:GO:0005581; C:GO:0016020; C:GO:0016021; F:GO:0042302	C:collagen trimer; C:membrane; C:integral component of membrane; F:structural constituent of cuticle
AgB02_g403_t02	elegans confirmed by transcript evidence	193	9	5.27479e-53	63.33	4	P:GO:0002119; P:GO:0009792; C:GO:0016020; C:GO:0016021	P:nematode larval development; P:embryo development ending in birth or egg hatching; C:membrane; C:integral component of membrane
[truncated: 16,776 more rows]

## Sheet: Parascaris GO annotation
Transcript_name	Description	Length	# Hits	e-value	similarity mean	# GO	GO IDs	GO Names
[truncated: 15,018 more rows]

[truncated: 5 more sheets: Toxocara GO annotation, Ascaris eliminated enrichment, Parascaris eliminated enrichmen, Toxocara eliminated enrichment, All eliminated enrichment]
