# Supplementary material for: Comparative genome analysis of programmed DNA elimination in nematodes
Source: HighWire-hosted journal article supplement (doi:10.1101/gr.225730.117), 2017-11-08
Supplement: Supplemental_Table_S13.xlsx [file Supplemental_Table_S13.xlsx]

## Sheet: CBR_upstream_50kb
Chromosome	Start	End	Transcript_name	Strand	Annotation	CBR.chr	CBR.start	CBR.end	CBR.ID	BP.strand	Dist to CBR	male mitotic region	spermatogenesis	post-meiotic region	seminal vesicle	spermatids	female mitotic region	female early pachytene	female late pachytene	female diplotene	oocyte	zygote1	zygote2	zygote3	zygote4	24h	46h	64h	96h	5d	7d	L1	L2	carcass	muscle	intestine
AgB01	13248794	13275395	AgB01_g828_t04	-	Protein-associating with the carboxyl-terminal domain of ezrin	AgB01	13270080	13270081	break_a01	+	0	7.8	8	2.2	0.5	1.9	4.4	2.9	2.8	2.1	2.4	4.5	4.3	4.9	6.6	15.8	14.2	8.9	8.7	7.9	6.3	5.8	3.5	1.4	1.2	1.5
AgB02	8016770	8064267	AgB02_g470_t13	-	EH domain-binding protein 1	AgB02	8060588	8060589	break_a04	+	0	7.9	5.6	4.3	2.8	3	5.1	4.1	3.9	3.6	2.4	4.6	3.6	3.5	5.7	7.8	7.8	4.8	4.4	4.5	3.8	2.7	4.1	2.1	2	1
AgB04	7926129	7937000	AgB04_g456_t02	-	dna-binding protein hexbp	AgB04	7927041	7927042	break_a07	+	0	6	1.4	0.4	0.1	0.5	13.2	24.3	23.4	4	14.4	128.6	177.1	235.7	151.6	206.8	308.5	333.5	23.5	2.2	2.5	2.1	0.2	5.4	0.6	0.3
AgB05	7777998	7786186	AgB05_g425_t01	+	hypothetical protein	AgB05	7782500	7782501	break_a08	+	0	1	0	0.2	0	0	0.6	0.3	0.3	0.1	0.2	0.7	1.2	1.1	1.4	4.7	4.7	3.4	0.7	0.1	0.6	0.4	0.8	0.2	0	0
AgB06	70993	89439	AgB06_g005_t04	-	hypothetical protein	AgB06	89260	89261	break_a09	-	0	36.9	166.2	25	0.4	5.5	0.1	0.1	0	0.3	0.2	0.4	0.7	0.7	0.3	0.6	0.4	0	0	0	0	0	0	0.6	0	0.1
AgB08X	13349	24653	AgB08X_g004_t01	+	hypothetical protein	AgB08X	16440	16441	break_a12	-	0	1	0.2	0.6	0.1	0.6	0.9	0.6	0.6	0.4	0.7	2.1	1.4	1.8	1.8	5.4	4.3	2.4	2.9	2.4	2.8	2.8	1.1	1.1	0.9	0.7
AgB10	65846	78232	AgB10_g003_t01	-	hypothetical protein	AgB10	77959	77960	break_a14	-	0	79.8	101.8	17.4	0.7	13.3	12.9	10	9.5	6.3	3.6	22.9	19.6	29.9	28.7	23.6	22	14.4	1.6	0.4	0.3	0.7	1.2	3.6	0.6	0.1
AgB14	76090	90922	AgB14_g007_t02	+	hypothetical protein	AgB14	88146	88147	break_a18	-	0	8.3	8.7	1.2	0.1	1.8	6.7	6.6	5.8	4.4	7	44.2	30.6	22.4	40.2	35	30.3	12.4	2.6	1	0.8	1	0	2.1	0.6	0.1
AgB16X	64451	99883	AgB16X_g005_t01	-	hypothetical protein	AgB16X	78831	78832	break_a20	-	0	4.1	3.6	2.3	0.8	1.9	6.5	3.8	3.6	2.2	2.2	6	4.7	3.8	8.3	15.8	13.4	7.2	4.7	4.3	3.2	2.9	2.3	3.1	1	1.1
AgB16X	76649	88765	AgB16X_g006_t04	+	Proto-oncogene serine/threonine-protein kinase pim-1	AgB16X	78831	78832	break_a20	-	0	2.8	2	0.4	0.1	0.3	1.2	0.6	0.5	0.5	0.9	2.9	2.2	1.4	2.9	7.3	5.4	2.5	2.6	2	1.8	1.1	1.7	0.7	0.4	0.2
AgB19	1123	11318	AgB19_g001_t04	-	MOG interacting and ectopic P-granules protein 1	AgB19	10810	10811	break_a23	-	0	27.3	2.8	0.3	0.2	9.1	12.8	23	23.9	8.4	11.7	57.2	85.6	82.2	66.5	28.6	23.9	14.8	0.8	0.2	0.5	0.6	0	1.6	0.6	0
AgB21	62162	67695	AgB21_g006_t03	-	hypothetical protein	AgB21	66339	66340	break_a25	-	0	11.5	1.6	0.2	0	1.1	3.4	1.3	1.7	0.4	0.3	1.4	2.1	1.6	2.4	9.2	11.1	6.8	1.3	0.5	0.3	0.3	0	0.2	0	0
AgB24	80718	88883	AgB24_g007_t01	+	hypothetical protein	AgB24	85792	85793	break_a28	-	0	6.5	6	1.1	0.1	1.1	3.4	2.3	2.2	0.5	0.8	2.5	2.7	2.5	3.6	7.1	7.1	3.2	0.7	0.3	0.2	0.3	0	0.2	0.1	0
AgB26	21897	29982	AgB26_g002_t01	+	hypothetical protein	AgB26	24643	24644	break_a30	-	0	2.9	5.7	1	0.1	0.2	0.5	0.4	0.5	0.2	1.4	6.8	3.3	3.5	3.8	2.7	2.7	2.8	3.3	2.7	1.6	1.8	2.2	1.7	0.8	0.2
AgB32	65499	94513	AgB32_g006_t01	+	Solute carrier family 2	AgB32	91446	91447	break_a36	-	0	103.9	181.1	18.1	0.7	4.6	1.4	2.2	2	0.6	0.6	2.1	3.1	2.8	2.6	3.2	2.4	0.8	0.1	0	0	0.1	0	0.5	0	0.1
AgB35X	9658	16729	AgB35X_g002_t01	+	hypothetical protein	AgB35X	15638	15639	break_a39	+	0	8.3	13.7	1.4	0.1	1.1	8.4	6.7	6.1	0.6	1.5	4.1	3.3	2.2	3.4	6.5	4.9	2.2	0.8	0.5	0.5	0.5	0	0.7	0.5	0.9
AgB02	4929152	4929792	AgB02_g287_t01	.	hypothetical protein	AgB02	4928286	4928287	break_a03	-	866	0.1	0	0.3	0	0	0.1	0.3	0.1	0	0	0.8	2	1.2	0.8	0.6	0.3	0.3	0	0	0	0	0	0	0	0
AgB22X	39694	48239	AgB22X_g004_t01	+	GTP-binding protein AGP-1	AgB22X	38536	38537	break_a26	-	1158	6.8	1.1	4	4.3	3.7	23.9	12.5	14.9	13.7	7.3	19.7	13.7	7.4	19.4	20.1	20.2	7.4	9.2	10.5	7.6	4.7	7	2.7	2.6	7.9
AgB13X	2256165	2256469	AgB13X_g102_t01	.	hypothetical protein	AgB13X	2258386	2258387	break_a17	+	1918	0.1	0	0.4	0.3	0.1	0.3	0.1	0	0.4	0	0	0	0	0.7	0.8	0.7	0.9	0	0	0.6	0	0	0.2	0.3	0
AgB20	170863	197069	AgB20_g014_t04	-	Rhomboid family member 1	AgB20	168415	168416	break_a24	-	2448	12.1	2.2	3.6	0.8	2.3	16.4	8.5	9	1.5	1.4	2.2	3	3.8	4.1	9.8	11.5	15	21.3	25.5	19.8	12.1	13.8	2.4	0.5	1.5
AgB33	74466	79312	AgB33_g006_t01	+	RNA-directed DNA polymerase from mobile element jockey	AgB33	81871	81872	break_a37	+	2560	1.1	1.3	0.1	0.1	0.1	0.3	0.3	0.3	0.1	0.1	0.5	0.6	0.7	0.7	0.8	0.3	0.3	1.2	2.6	2.3	8.8	35.3	0.5	0.4	0.2
AgB06	91960	100676	AgB06_g006_t05	-	esterase cm06b1	AgB06	89260	89261	break_a09	-	2700	0.8	7	2.2	0	0.3	0.8	0.5	0.5	0.3	0.4	1.2	1.6	1.2	2.3	5.5	6.5	12.7	55.4	78	67.5	85.5	78.7	3	1.3	0.1
AgB07	21933	28827	AgB07_g003_t01	+	hypothetical protein	AgB07	31808	31809	break_a10	+	2982	0.3	0.1	0.1	0	0	0.2	0	0	0	0	0.1	0.1	0	0	0.5	0.9	1	0.2	0.2	0.1	0.2	0	0	0	0
AgB18	82666	101865	AgB18_g005_t03	-	ATP-binding cassette sub-family E member 1	AgB18	79674	79675	break_a22	-	2992	28.4	15	23.8	18.4	25.1	37.6	16.7	16.1	14	9.4	14.7	14.1	15.1	24	35.2	43.3	31.4	43	39.2	35.5	25.1	17.9	24.2	26.4	21.4
AgB23	1062905	1073388	AgB23_g071_t03	-	hypothetical protein	AgB23	1076444	1076445	break_a27	+	3057	0.7	0.5	8.3	1.3	2.5	0.7	0.8	0.6	15.7	10.3	0.5	0.5	0.4	0.7	2.6	3	1	3.9	2	1	4.7	21.2	8.4	17.2	0
AgB30	25371	32792	AgB30_g002_t02	-	Thioredoxin-1, partial	AgB30	22174	22175	break_a34	-	3197	4.1	5.2	0.4	0	0.4	12	16.3	19.6	12.8	33.5	144.3	105.3	79.7	71.2	19.2	9.6	4.7	3.5	0.9	0.7	3.3	5.1	7.4	24.8	0.1
AgB07	89719	103174	AgB07_g008_t04	+	Mitogen-activated protein kinase pmk-3	AgB07	86071	86072	break_a11	-	3648	0.6	0.1	3.1	1	0.5	0.7	0.8	0.5	0.4	0.7	2.1	1.1	0.9	1.4	2.4	2.1	1.7	3.4	3	2.9	3.9	9.4	1.3	1.2	1.7
AgB15X	66846	68813	AgB15X_g004_t01	-	hypothetical protein	AgB15X	62768	62769	break_a19	-	4078	1.4	0.6	0.7	0.1	0.2	1.1	0.5	1.1	0.6	0.6	2	2	1.3	1	4.3	2.5	2.5	0.6	0.1	0.1	0.2	0	0.3	0.1	0
AgB21	70421	89120	AgB21_g007_t01	-	Nuclear RNA export factor 1	AgB21	66339	66340	break_a25	-	4082	6.5	0.9	4.6	1.8	1.6	10	4.4	4.4	1.9	3.8	5	7.2	6.1	12.3	23.6	28.7	25	36.3	37.6	38.7	26.9	32.4	9.3	1.5	4.9
AgB19	15010	56520	AgB19_g002_t01	+	homeobox protein ceh-19	AgB19	10810	10811	break_a23	-	4200	0.9	0.7	0.5	0.3	0.3	1.4	1.2	1.4	0.7	0.5	3.1	2.7	2.2	2.4	5.9	4.8	3.2	2	1.7	1.5	10.6	2.7	1	1.1	1
AgB10	82232	104074	AgB10_g004_t03	+	Eukaryotic translation initiation factor 3 subunit A	AgB10	77959	77960	break_a14	-	4273	39.3	24.2	53.8	24.5	31.8	96.3	38.2	39.3	21.7	22.8	39.8	49.4	68.8	59	72.1	88.8	66.9	53.5	51.3	55.6	31.6	58.7	32.3	28.7	82.7
AgB13X	2253610	2253945	AgB13X_g101_t01	+	hypothetical protein	AgB13X	2258386	2258387	break_a17	+	4442	0.2	0	0.4	0.4	0	0.6	0.2	0.2	0	0	0.1	0.9	0	0.6	0.9	0.6	0	0.1	0.4	0.3	0	0	0	0	0
AgB04	7918967	7922428	AgB04_g455_t01	+	hypothetical protein	AgB04	7927041	7927042	break_a07	+	4614	0.9	0.4	0	0	0	0.1	0	0	0	0	0	0.2	0	0.1	0.3	0.2	0.1	0	0	0	0.1	0	0	0	0
AgB36X	7192	15261	AgB36X_g002_t01	-	Programmed cell death protein 6	AgB36X	20240	20241	break_a40	+	4980	2.8	3.6	2.1	0.7	1.1	2.6	1.4	1.5	1.3	2.7	3.5	2.8	2.7	3.8	6.2	6.3	4.4	4.9	4.9	4.4	5.2	0.6	1.2	0.6	2.1
AgB05	7764471	7777380	AgB05_g424_t01	+	Beta-1,4-N-acetylgalactosaminyltransferase bre-4	AgB05	7782500	7782501	break_a08	+	5121	5.1	1.9	3.2	1.2	1.2	3.7	4.3	4.2	6.8	8.4	17.5	16.2	11.4	13.1	10.6	8.3	5.8	7.1	7.6	7.1	4.6	6.3	2.8	1.9	1.1
AgB36X	12686	15002	AgB36X_g003_t01	.	hypothetical protein	AgB36X	20240	20241	break_a40	+	5239	3.2	11.9	0.9	0	0.4	2.5	0.9	1.2	0	0	0.4	1.2	0.7	0.4	3.1	3.7	1.8	1	0.3	0.3	0.3	0.7	0	0	0
AgB26	30536	33937	AgB26_g003_t01	+	e3 ubiquitin-protein ligase rnf14	AgB26	24643	24644	break_a30	-	5893	0.4	0.5	0.8	0.1	0	1	0.4	1	0.7	1	6.4	3.3	1.1	4.2	4.8	2.2	2.3	4.2	5.3	1.6	2.2	0	1.2	0.7	0.5
AgB35X	4920	9499	AgB35X_g001_t02	+	hypothetical protein	AgB35X	15638	15639	break_a39	+	6140	55	94.1	10.5	1	6.2	47	45.5	43.7	5	6.7	27.2	25.2	21.5	16.5	28.2	18.9	9.5	4.3	1.6	1.5	1.1	0	2	1.9	5.2
AgB08X	22724	37815	AgB08X_g005_t02	-	rnase h family member (rnh-)	AgB08X	16440	16441	break_a12	-	6284	6	1.8	5	1.2	3.8	6.2	5.5	4.5	9.1	12.6	15	19.8	22.6	14	12.9	18	20.6	28.4	30.7	34.7	28.1	12.8	14	18.8	10.6
AgB12	42483	79935	AgB12_g003_t01	-	Peroxidasin	AgB12	36178	36179	break_a16	-	6305	2.9	0.6	1.9	1	0.8	6	6	6.2	1.7	1.7	8.2	8.7	8.7	13.8	8.9	8.5	6.6	9.1	9.3	7.7	7.8	3.1	2.6	1.7	1
AgB02	8332970	8338045	AgB02_g489_t01	-	potassium voltage-gated channel protein shaw	AgB02	8326560	8326561	break_a05	-	6410	0.7	0.2	0	0.5	0.7	1.6	1.1	1.5	0.3	0.4	1.6	1.8	1.8	1.7	3.3	3.2	1.8	0.1	0	0.2	0.1	0.8	0.7	0.6	0
AgB15X	69957	71517	AgB15X_g005_t02	-	hypothetical protein	AgB15X	62768	62769	break_a19	-	7189	2.6	0.9	0.7	0.2	0	0.4	0.7	0.7	0.2	0.2	0	0	0.3	0.3	0.3	0.2	0.2	0	0	0	0	0	0	0	0
AgB12	43580	52751	AgB12_g004_t02	+	replication factor c subunit 3	AgB12	36178	36179	break_a16	-	7402	9.4	1.5	7.6	7.4	5	13.4	10.3	10.8	7	11.4	55.3	60.2	50.3	61.1	57.6	56.9	32.4	60.3	61.3	36.8	16.4	8	13.7	10.6	6.5
AgB17	1457438	1466444	AgB17_g091_t01	-	hypothetical protein	AgB17	1474205	1474206	break_a21	+	7762	2.8	0.3	0	0	0.1	3.1	10.1	7.3	0.2	0.3	3.3	2.1	0.7	1.5	6	6.9	4.3	0.4	0.1	0.1	6.8	14.6	0.2	0.1	0
AgB14	96466	123318	AgB14_g008_t02	+	integrin alpha pat-2	AgB14	88146	88147	break_a18	-	8320	2.4	2.3	89	10.5	9.6	12.6	18.3	18.9	114.9	42.4	4.7	4.6	5.6	7.5	5.3	3.2	1.7	0.8	9.1	28.6	36	40.7	25.6	31	0.6
AgB28X	36619	52936	AgB28X_g006_t01	+	Casein kinase II subunit beta	AgB28X	61402	61403	break_a32	+	8467	10	1.2	8.7	8.2	7.1	25.3	19.4	17.7	5.8	4.8	16.7	19.6	15.3	30.3	31.3	40.2	27.5	30.9	28.2	18.8	14.6	8.1	7.9	6.1	7.5
AgB29	268810	273871	AgB29_g021_t02	-	e3 ubiquitin-protein ligase rnf14	AgB29	260332	260333	break_a33	-	8478	1.5	2.2	0.4	0.1	0.1	0.5	0.4	0.5	0.1	1.5	3.4	2	1.4	3	7.8	6.1	3.5	9.4	9.7	9.5	6.3	5.8	1.4	0.9	0.6
AgB02	4937592	4948308	AgB02_g288_t02	-	Annexin-B11	AgB02	4928286	4928287	break_a03	-	9306	18.2	1.8	32.4	5.4	4.8	106	102.6	107.4	38.6	37.5	56.6	80.1	226.7	66.2	23.3	21.4	61.4	22.2	24.6	21.2	14.6	23.4	335.6	59	5.6
AgB03	180115	187535	AgB03_g010_t05	-	AarF domain-containing protein kinase 1, partial	AgB03	170751	170752	break_a06	-	9364	37.8	15.7	9.8	4	4.1	24.2	13.4	12.4	3.7	3.5	6.9	6.7	3.5	11.9	21.7	18.1	8.5	11.3	12.7	11.1	7.1	6.4	1.5	0.7	1.4
AgB11	53204	58394	AgB11_g004_t02	-	hypothetical protein	AgB11	43776	43777	break_a15	-	9428	9.5	27.4	2.8	0.1	0.5	0	0	0	0	0	0.3	0.2	0.3	0.3	0.2	0.3	0.1	0	0	0	0	0	0	0	0
AgB33	51985	71870	AgB33_g005_t02	+	DC-STAMP domain-containing protein 2	AgB33	81871	81872	break_a37	+	10002	30.3	110.8	7.8	0.3	1.3	0	0.1	0	0	0	0.2	0.3	0.1	0.2	0.1	0.1	0	0	0.1	0.1	0.1	0	0.2	0	0.1
AgB15X	73541	82314	AgB15X_g006_t01	+	Protein-glutamate O-methyltransferase	AgB15X	62768	62769	break_a19	-	10773	13	10.3	9.2	6.6	7.5	22.9	16.6	17	5.5	13.1	20	23.2	17	37.1	40.4	31.4	16.5	14.6	16.2	12.8	8.3	5.5	2.4	2.4	2.6
AgB26	35631	46270	AgB26_g004_t03	-	esterase cm06b1	AgB26	24643	24644	break_a30	-	10988	4.3	2.6	29.8	2.8	3.8	3.6	6.1	5.7	37.3	26.7	6.1	4.8	4.9	4.6	2.9	2.1	0.4	1.3	1.9	3.4	1.2	0	42.1	16.9	294.3
AgB24	97345	102284	AgB24_g008_t01	+	hypothetical protein	AgB24	85792	85793	break_a28	-	11553	1.9	0.5	0.3	0.8	0	0	0	0	0	0	0	0.3	0	0	2.9	4	1.8	0.3	0.1	1.2	46.1	274.3	1	0.1	0
AgB07	19311	19792	AgB07_g002_t01	.	hypothetical protein	AgB07	31808	31809	break_a10	+	12017	0	0	0	0	0	0.2	0.4	0	0	0	0	0	0	0	1.4	0.5	0.3	0.1	0.1	0	0.4	3.6	0	0	0
AgB36X	7184	7615	AgB36X_g001_t01	+	Programmed cell death protein 6	AgB36X	20240	20241	break_a40	+	12626	9.7	2.3	17.1	10.4	8.8	18.4	7.6	11.1	13.7	5.7	5.4	5.2	2.3	6.5	4.8	5	2.6	6.4	5.5	6.4	12.6	8.2	12.1	4.7	16.2
AgB09X	3162801	3166002	AgB09X_g151_t02	-	Transmembrane protein 144	AgB09X	3179382	3179383	break_a13	+	13381	0.4	0	0	0	0	0.1	0	0	0	0	0	0	0	0	0.2	0	0	0	0	0	0.7	78.3	1	0	0
AgB27X	323936	329150	AgB27X_g020_t01	-	Ras-related protein Rab-8B	AgB27X	342838	342839	break_a31	+	13689	3.5	0.2	4.4	5.6	3.5	8.5	6.8	6.6	3.9	12.2	38.8	30.5	19.2	27	33	27.4	27.7	34.8	33	25.6	20	19.5	11.7	6.6	17.8
AgB04	7912794	7913063	AgB04_g454_t01	-	hypothetical protein	AgB04	7927041	7927042	break_a07	+	13979	0.3	0	0.2	0	0	0.4	0.2	0	0	0	0	0.4	0	0.7	0.6	0.3	1.2	0.1	0.5	0.3	0	0	0.1	0	0.2
AgB23	1055693	1061493	AgB23_g070_t02	-	hypothetical protein	AgB23	1076444	1076445	break_a27	+	14952	0	0.1	0.2	0	3	0	0	0	0	0.1	0.1	0	0	0.1	0.2	0.1	0.2	0.1	0.1	0.1	1.6	14.7	11	18.2	0.2
AgB15X	77882	110168	AgB15X_g007_t06	-	DNA excision repair protein ERCC-6, partial	AgB15X	62768	62769	break_a19	-	15114	3.8	2.9	1.7	0.9	1.5	3.8	3	3.1	1.5	3.5	11.1	8.3	5.6	10.6	15.9	12.9	7.1	10	9.1	8.6	5.9	5.9	2.7	2.1	2.7
AgB30	37883	49753	AgB30_g003_t01	+	Golgin subfamily A member 2	AgB30	22174	22175	break_a34	-	15709	15.7	14.6	7	1.9	8.2	8.7	7.8	7.4	6.8	4.5	4.3	5.1	6.9	8.7	10	13.2	15.3	10.9	10.7	15.4	9.9	9.9	3.6	4.1	3.3
AgB04	7869377	7911024	AgB04_g453_t08	-	S phase cyclin A-associated protein in the endoplasmic reticulum	AgB04	7927041	7927042	break_a07	+	16018	10.2	4.4	4.4	0.4	3.7	9.4	6.4	5.8	4.1	5.4	7.9	10.5	18.5	12.2	22.1	23.4	25.2	19.6	23.2	23.1	17.9	30.7	4	2.1	6.7
AgB02	4834285	4834587	AgB02_g277_t01	-	Transposon-derived protein, partial	AgB02	4850627	4850628	break_a02	+	16041	0.5	0.1	0.1	0	0	0.2	0	0	0	0	0	0	1.6	0	0.5	0	0	0.1	0.1	0.1	0	0	0.2	0.1	0.4
AgB31X	137540	141603	AgB31X_g013_t04	-	Craniofacial development protein 1	AgB31X	119171	119172	break_a35	-	18369	3.1	0.3	0.4	0.2	0.9	1.3	1.3	1	0.4	1	6.8	4.4	4.4	5.9	13.5	14.1	10.5	14.4	10.7	9.5	12.8	3.8	2.3	1.2	0.6
AgB03	190342	201434	AgB03_g011_t04	+	hypothetical protein	AgB03	170751	170752	break_a06	-	19591	5.6	1.6	2.2	0.9	3.4	5.5	3.1	3.1	2.7	4.5	33.2	22.7	18.6	27.5	40.6	34.2	26.5	34	37.3	28.1	17.6	23.2	5.6	3.6	2.7
AgB02	4801228	4830820	AgB02_g276_t02	-	Serine/threonine-protein kinase PAK 3	AgB02	4850627	4850628	break_a02	+	19808	14.6	1	6.8	9.9	9.7	28	23.2	22	5.5	4.4	21.4	17.7	24.6	25.2	21.2	17.8	20.4	11.3	12.9	11	6.7	5.5	8	4.8	2.5
AgB07	106095	107856	AgB07_g009_t01	-	mitogen-activated protein kinase pmk-3	AgB07	86071	86072	break_a11	-	20024	6.5	1.6	9.6	14.8	7.8	14	9.4	10.8	9.6	2.3	4.1	3.2	10.4	11	7.7	12.9	16.4	10	7.6	8.2	6.6	7.5	6.9	6.8	15.1
AgB25	436592	460198	AgB25_g026_t02	-	Elongator complex protein 2	AgB25	481208	481209	break_a29	+	21011	20.8	2.6	9.8	4.7	6	37.6	17	18.2	5.7	4.4	8.8	7.6	6.4	15.4	39.2	62.1	43.3	49.9	37.3	34.5	25.8	20.6	9.1	7.4	6.8
AgB11	65244	68246	AgB11_g005_t01	+	hypothetical protein	AgB11	43776	43777	break_a15	-	21468	1.5	1.2	0.1	0	0.6	0.1	0.1	0	0.8	1.5	1.7	1.8	0.8	1.6	1.6	1	0.1	0.8	0.3	2.2	2.6	0	4.2	6.8	0.2
AgB16X	100914	107569	AgB16X_g007_t03	+	rho gtpase-activating protein 1	AgB16X	78831	78832	break_a20	-	22083	18.4	1.6	4.4	2.3	4.3	26.1	17.7	19.3	2.6	0.6	1.1	1.8	2.5	3.3	18.7	17.5	13.8	5.3	4.4	4	3.2	1.2	0.8	0.2	0.5
AgB27X	304792	320662	AgB27X_g019_t02	+	Type II inositol-1,4,5-trisphosphate 5-phosphatase	AgB27X	342838	342839	break_a31	+	22177	37.1	6.5	66.5	57.6	35.6	80.5	58.1	57.1	35.4	16.4	39.1	33.6	45.8	52	21.7	27.8	28.6	26.2	29.8	32	22.2	28.7	23.1	19.3	60.3
AgB05	7754827	7759987	AgB05_g423_t01	+	Glycine receptor subunit beta	AgB05	7782500	7782501	break_a08	+	22514	5.6	0.3	0.5	8.6	2.3	5.2	4.6	4.6	3.1	1.4	4.1	4.8	6.3	4.7	1.1	0.5	0.5	0.7	0.2	0.8	24.2	24.9	8.6	38.3	0.3
AgB23	1053329	1053629	AgB23_g069_t01	.	hypothetical protein	AgB23	1076444	1076445	break_a27	+	22816	0	0	0	0	0	0	0	0	0	0	0	0	0	0	0	0	0	0	0	0	0	0	0	0.1	0
AgB22X	61593	64616	AgB22X_g005_t01	-	cre-hot-7 protein	AgB22X	38536	38537	break_a26	-	23057	0	0	0	0	0	0.5	1.4	1.6	3	2.1	12.1	6.9	5.7	15	4.4	3.1	1	0.5	0.7	0.4	1.5	4.4	0.3	0	0
AgB18	103558	123093	AgB18_g006_t04	+	Phospholipase B-like protein 3, partial	AgB18	79674	79675	break_a22	-	23884	1.1	0.4	0	0	0.8	0.5	0.2	0.1	0	0.1	0.2	0.3	0.3	0.3	0.4	0.3	1.1	33	37.2	22.1	3.7	0.6	10.3	1.3	32.5
AgB19	34694	66591	AgB19_g003_t01	-	Uncharacterized protein F52C9.5	AgB19	10810	10811	break_a23	-	23884	3.4	2.2	3.4	2.9	2.2	7.6	4.2	4	3.5	2.1	6.5	5.9	5.6	7.3	24.3	27.8	17.4	6.8	5.3	5.9	40.5	6.2	2.2	2.1	4.3
AgB24	109723	110882	AgB24_g009_t01	+	hypothetical protein	AgB24	85792	85793	break_a28	-	23931	0	0	0	0	0	0	0	0	0	0	0	0	0	0	0	0	0	0	0	0.2	7	3.1	0	0	0
AgB23	1044900	1051817	AgB23_g068_t09	-	hypothetical protein	AgB23	1076444	1076445	break_a27	+	24628	0.7	4.1	1.2	0.1	3.9	0	0	0	0	0.1	0	0	0	0	0	0	0	0	0.1	0	0	5.4	38.3	29	4.7
AgB17	1438113	1449436	AgB17_g090_t06	-	dnj-3	AgB17	1474205	1474206	break_a21	+	24770	52.8	4.6	29.4	63.8	41.2	76	94.9	90	66	83.6	189.3	278.8	237.3	146.3	131.3	138	142.2	82.3	57	36.8	48.6	35.9	97.6	42	95.2
AgB21	92003	101803	AgB21_g008_t06	+	Breast carcinoma-amplified sequence 3	AgB21	66339	66340	break_a25	-	25664	5	0.7	1.5	1	2.1	4.2	5.2	5.1	3.3	5.5	26.8	20.4	20.6	17.5	18	19.3	9.6	7.5	7.5	7.5	5.6	6.4	4	3.1	4.1
AgB02	4954221	4961242	AgB02_g289_t04	+	hypothetical protein	AgB02	4928286	4928287	break_a03	-	25935	0.4	0.3	7.5	4.8	5.8	0.9	1.1	1	10.7	15.8	0.4	0.4	1.4	0	0.8	0.2	0.3	0.9	2.6	8.3	14.7	5.3	58.6	51.3	79.6
AgB08X	42669	56560	AgB08X_g006_t01	-	dihydrolipoyl dehydrogenase-binding protein	AgB08X	16440	16441	break_a12	-	26229	19.7	2.3	19.5	21.8	15	26.7	19.7	18.1	11.9	20.8	43	50.2	76.4	37.1	38.4	44.7	59.4	37.4	29.6	19.8	15.1	38	118.4	201.5	26.1
AgB21	93954	128612	AgB21_g009_t09	-	Breast carcinoma-amplified sequence 3	AgB21	66339	66340	break_a25	-	27615	9.4	1.7	5.1	6.9	5.1	12	6.3	7.2	4.1	2.6	5.3	6.4	6.7	8.3	11	15.4	14.7	7.3	7.4	6.3	5.1	9.7	3.4	2.7	5.1
AgB07	113894	118656	AgB07_g010_t01	+	hypothetical protein	AgB07	86071	86072	break_a11	-	27823	26.2	1.9	8.5	21	6.6	49.7	45	40.2	19.4	20.9	68.1	69.2	89.3	55.7	32.3	26.4	25	12.7	17.6	23.8	17.8	16.6	12.6	15.2	27.4
AgB28X	31358	33142	AgB28X_g005_t01	+	LINE-1 reverse transcriptase	AgB28X	61402	61403	break_a32	+	28261	2.2	1.2	1.2	0.2	0	0.6	0.2	0.3	0.3	0.1	0.1	0.3	0.1	0.1	0.7	0.6	1	1.7	1.4	1.4	0.8	0	0.1	0.1	0.1
AgB05	7749308	7753981	AgB05_g422_t01	.	hypothetical protein	AgB05	7782500	7782501	break_a08	+	28520	1.3	0	0.9	0	0.5	2.8	6	5.5	1.9	1.4	9.2	6.8	3.8	6.5	5.2	3.5	2.2	4.1	3.4	2.6	3	3.3	0.5	0.4	1.4
AgB01	13231039	13240583	AgB01_g827_t01	-	Carbonic anhydrase 5	AgB01	13270080	13270081	break_a01	+	29498	12.1	2	3.5	1.3	4.6	60.8	72	66.3	40.6	52.1	63.1	59	71.8	73	23.3	15.6	4.9	0.6	0.2	2.8	12.4	3.8	23.2	73.9	0.1
AgB06	118807	128282	AgB06_g007_t01	+	amine oxidase-like protein	AgB06	89260	89261	break_a09	-	29547	6.9	3.3	1	2.7	2	40.4	50.2	48.4	12	15.1	28.2	29.6	38.1	45.6	11.1	6.4	3	1.4	2.2	1.3	1	2.1	1.4	1.3	0.4
AgB20	198978	211397	AgB20_g015_t02	-	Uncharacterized protein C45G9.5	AgB20	168415	168416	break_a24	-	30563	3.6	1.2	1.2	0.7	1.4	7.5	5	5.2	1.5	2.1	6.8	4.4	2.9	6.3	9	6.9	5.2	10.9	9.4	8.5	8.6	14.8	3.3	1.3	2.5
AgB07	1	1003	AgB07_g001_t01	.	hypothetical protein	AgB07	31808	31809	break_a10	+	30806	0.1	1	0	0.1	0.5	0.7	0.5	0.3	0	0	0	0.3	0.1	0	0.1	0	0	0	0	0	0	0	0	0	0
AgB02	8357408	8364711	AgB02_g490_t01	-	potassium voltage-gated channel protein shaw	AgB02	8326560	8326561	break_a05	-	30848	0.3	0	0.5	0.7	0.8	0.5	0.8	0.9	1.3	0.7	0.3	0.8	0.6	1	1.6	1.5	0.5	0.7	0.6	0.6	1	0.9	1.1	3.7	0.1
AgB23	1037271	1044670	AgB23_g067_t10	-	hypothetical protein	AgB23	1076444	1076445	break_a27	+	31775	0.6	1.2	0.4	0	0.9	0.8	4.6	4.9	1.6	1.4	8.9	10.9	15.3	10.4	3.8	3.7	2.6	1.7	2.8	4.8	9.7	0.4	8.6	4.1	76.4
AgB09X	3131200	3147133	AgB09X_g150_t01	-	Small glutamine-rich tetratricopeptide repeat-containing protein beta	AgB09X	3179382	3179383	break_a13	+	32250	1.6	0.2	2.8	2.8	2.1	2.6	1.4	1.7	1.8	3.6	10.6	8.4	6	9.7	11	11.8	8.4	15.5	12.9	10.6	9	11.7	9.8	9.4	9.2
AgB33	46518	49157	AgB33_g004_t03	+	pantothenate kinase 4	AgB33	81871	81872	break_a37	+	32715	1.9	0.3	1.8	0.6	0.8	0.5	0.2	0.3	0.4	0.4	0.7	1	1.6	0.8	6	3.6	5.3	5.2	2.9	0.9	0.8	0	1.1	2	0.4
AgB07	119076	120576	AgB07_g011_t01	-	hypothetical protein	AgB07	86071	86072	break_a11	-	33005	0.3	0	0	0	0	0	0	0	0	0	0	0	0	0	0.1	0	0	0	0	0	0	0	0.3	0	0
AgB18	112853	113160	AgB18_g007_t01	.	hypothetical protein	AgB18	79674	79675	break_a22	-	33179	0	0	0	0	0	0	0	0	0	0	0	0	0	0.1	0.2	0	0	2.8	2.8	2.5	0.8	0	0.1	0	0.8
AgB03	204279	210027	AgB03_g012_t04	-	Glutaredoxin 3, partial	AgB03	170751	170752	break_a06	-	33528	88.9	24.3	42.5	61.1	80.1	176.4	187.4	177.8	90	53.6	238.2	204.4	176.7	230.6	133.7	150.3	102.5	92.9	71.5	38.4	38.3	58.3	58.6	46.3	61.7
AgB02	4961869	4962207	AgB02_g290_t01	.	hypothetical protein	AgB02	4928286	4928287	break_a03	-	33583	0	0	0	0	0	0	0	0	0	0	0	0	1.7	0	0	0	0	0	0	0.2	0.3	0	0.6	0.4	2
AgB02	8012777	8026812	AgB02_g469_t03	+	histone deacetylase 11	AgB02	8060588	8060589	break_a04	+	33777	5.2	3.1	1.9	1.7	1.7	7.9	7	6.6	3.8	6.3	12.8	9	6.8	12.5	12.1	8.8	5.3	7.1	7.6	6.7	5	8.3	4	3.4	1.7
AgB05	7747344	7748599	AgB05_g421_t01	-	hypothetical protein	AgB05	7782500	7782501	break_a08	+	33902	0	0	0.2	0	0	0	0	0	0	0	0.1	0	0	0.2	0.1	0.8	0.6	0.3	0	0.3	0.1	0	0	0	0
AgB07	120708	121819	AgB07_g012_t01	+	hypothetical protein	AgB07	86071	86072	break_a11	-	34637	0.1	0	0	0	0.1	0	0	0	0	0	0	0	0	0	0	0	0	0	0	0	0	0	0.6	0.1	0.2
AgB10	113226	125613	AgB10_g005_t01	+	hypothetical protein	AgB10	77959	77960	break_a14	-	35267	0	0.3	0.1	0	9.1	0	0.2	0.1	0	0.1	0.5	0.6	0.9	0.8	5.4	13.7	16.2	2.4	0.3	13.1	11.9	146.3	100.6	90.1	0
AgB28X	13420	25850	AgB28X_g004_t05	-	protein capicua	AgB28X	61402	61403	break_a32	+	35553	12	20.1	5.7	0.3	1.1	0.2	0.2	0.2	0.4	0.2	0.5	0.5	1	0.7	0.6	0.5	0.8	0.6	0.4	0.5	0.9	59.4	2.6	0.3	0.3
AgB26	60981	70888	AgB26_g005_t01	+	NAD-dependent deacetylase SIR2	AgB26	24643	24644	break_a30	-	36338	38	4.9	4.7	2.1	3.2	37.1	31.2	31.3	13.2	4.1	31.7	33.7	18	28.8	40.3	46.7	31	39.9	38.5	28	22.8	5.8	2.6	0.7	1.4
AgB02	8364567	8365738	AgB02_g491_t02	+	Egl nine 1	AgB02	8326560	8326561	break_a05	-	38007	2.1	0.7	12.3	29.3	17.4	14.9	27.8	26.9	10.5	1.7	4.3	6.7	28.3	10.9	9.8	8.6	14.5	8.3	3.9	7.1	5.7	0	2.7	7.7	3.4
AgB17	1418849	1435054	AgB17_g088_t01	+	Long-chain-fatty-acid--CoA ligase 5	AgB17	1474205	1474206	break_a21	+	39152	2.4	1.2	1.4	1.1	1.6	4.7	2.9	3.2	1.8	2.2	14	12.1	12.5	21.3	14.1	14.4	9.6	8.2	7.8	8.7	36.2	6.9	3.5	2.5	2.2
AgB30	62053	67953	AgB30_g005_t01	+	Golgin subfamily A member 2	AgB30	22174	22175	break_a34	-	39879	0.7	0.6	0.2	0	0.1	0.5	0.3	0.2	0.8	0.3	0.8	0.4	0.6	1.1	2.3	1.2	0.7	2.5	2.3	2.4	2.4	1.7	1.5	2	0.7
AgB05	7737830	7742463	AgB05_g420_t01	+	hypothetical protein	AgB05	7782500	7782501	break_a08	+	40038	0.2	0	0	0	0	1.2	1.8	1.9	0.7	1.7	13.6	26.6	35.2	9.7	5.6	4.3	1.8	0.1	0.1	0.1	0.4	0.9	0.2	0	0
AgB14	128189	135862	AgB14_g009_t01	+	BTB and MATH domain-containing protein 42	AgB14	88146	88147	break_a18	-	40043	14.6	1.8	7.1	2.3	3.4	19.9	9.4	8.3	6.3	2	11.6	9.5	7.7	21.1	35	41.6	25.3	28.4	25.1	23.2	12.1	11.1	5.5	1.5	2.6
AgB27X	290568	302795	AgB27X_g018_t02	-	synapse-associated protein 1	AgB27X	342838	342839	break_a31	+	40044	10.7	1.6	3.4	2.5	3	19.5	10.3	10.5	8.4	12.9	55.8	46.4	42.1	45.7	36.1	22.7	17.6	22.7	20.8	16.7	13.8	14.8	8.7	7.9	10.3
AgB01	13225777	13229836	AgB01_g826_t01	+	hypothetical protein	AgB01	13270080	13270081	break_a01	+	40245	0.9	0.5	0.4	0	1.6	0.5	0.5	0.7	1.3	1.9	0.4	0.1	0.7	0.5	0.7	0.9	1.4	1.1	1.2	0.7	1.6	0.9	268.7	87.5	0.1
AgB15X	103161	104872	AgB15X_g008_t01	.	dna excision repair protein ercc-6	AgB15X	62768	62769	break_a19	-	40393	0.2	0.1	0.3	0.2	0	0.4	0.6	0.4	0.1	0.1	0.4	0.4	0	0.9	1.3	1.7	1.1	2.1	2	2.1	2.2	1	0.1	0.2	0.7
AgB02	8367123	8367272	AgB02_g492_t01	.	potassium voltage-gated channel protein shaw	AgB02	8326560	8326561	break_a05	-	40563	0	0	0	0	0	0	0	0	0	0	0	0	0	0	2.7	2.5	1.5	0.2	0.6	0	0.9	11.5	2.3	10.4	0
AgB09X	3125340	3138332	AgB09X_g149_t05	+	Small glutamine-rich tetratricopeptide repeat-containing protein beta	AgB09X	3179382	3179383	break_a13	+	41051	12.8	1.6	22	32.1	19.9	24.7	15.4	14.9	20.5	26.4	69.8	80.9	81.2	69.1	52	73.7	58.8	63.9	50	40	22.6	49.3	34.6	25.2	37
AgB06	130653	153100	AgB06_g008_t04	-	Cleavage and polyadenylation specificity factor subunit 1	AgB06	89260	89261	break_a09	-	41393	22.8	5	4.5	1.9	5.4	48	33.7	34.3	9.2	4.1	21.4	19.3	25.5	28	25.8	27.5	30.1	38.1	42.4	33.1	19	24.5	2.7	1.3	3
AgB07	127936	131615	AgB07_g013_t01	-	Lysosomal acid phosphatase	AgB07	86071	86072	break_a11	-	41865	2.2	8.5	25.1	0	2.4	0.2	0.7	0.5	0.2	0.2	0	0	0	0	0	0	0	0	0.2	0	0	0	20.7	1.1	21
AgB22X	80479	85780	AgB22X_g006_t01	+	Golgin subfamily A member 2	AgB22X	38536	38537	break_a26	-	41943	1.9	1.3	0.5	0.2	1.2	0.5	0.8	0.3	1.9	1.4	0.6	1.7	2.7	1.2	2.8	2.4	2.9	3.1	4.5	4.7	3.2	6.6	1.2	1.4	1.1
AgB02	4970561	4987230	AgB02_g291_t01	+	hypothetical protein	AgB02	4928286	4928287	break_a03	-	42275	3.3	1.9	1.4	2	1.4	7.4	6.1	5.8	13.2	21.2	5.4	7.8	13.3	14.3	5.6	2.8	1.2	0.5	0.9	6.4	14.3	3.3	4.7	5.5	37.8
AgB03	213109	253242	AgB03_g013_t02	+	Vacuolar protein sorting-associated protein 54	AgB03	170751	170752	break_a06	-	42358	11.7	1.4	2.8	4	4.4	20.4	9.8	10.6	1.3	1	1.9	2.4	2.8	3.5	7.3	6.3	7.5	7.4	7.4	7.8	6.2	7.5	1.7	1.6	2.7
AgB23	1030291	1034068	AgB23_g066_t02	-	Paternally-expressed gene 3 protein	AgB23	1076444	1076445	break_a27	+	42377	0.1	0.6	0.4	0.1	2.1	0	0	0	0	0	0	0.2	0	0	0.2	0.1	0.1	0	0	0	30.2	2.1	398	205.9	0.1
AgB08X	59126	59473	AgB08X_g007_t01	+	hypothetical protein	AgB08X	16440	16441	break_a12	-	42686	0.2	0	0.8	0	0	0.3	0	0.2	0	0	0	0	0	0.1	0	0.1	0	0.3	0.4	0.3	0.1	0	0	0	0.1
AgB20	212526	219368	AgB20_g016_t04	-	hypothetical protein	AgB20	168415	168416	break_a24	-	44111	27.3	51	5.9	0.3	1.5	1.8	1.7	2.2	0.6	0.9	3.4	2.3	2.5	4.9	2.5	2.4	3	0.8	0.4	0.2	0.5	0	1.5	0.7	0.2
AgB08X	61030	72015	AgB08X_g008_t01	-	Charged multivesicular body protein 3	AgB08X	16440	16441	break_a12	-	44590	2.1	0.4	2.1	1	1.1	2.1	1.7	1.4	1.6	7.4	6.8	4.7	2.7	4.8	8.4	10.3	7.6	17	14.3	9.6	6.7	10.6	5.8	6.3	2.8
AgB02	8371496	8384771	AgB02_g493_t01	-	potassium voltage-gated channel protein shaw	AgB02	8326560	8326561	break_a05	-	44936	0.4	0.1	0	0	0	0.1	0	0	0	0	0	0	0.8	0	0.2	0	0	0	0.1	0	0.2	0	0.2	0.3	0
AgB01	13210593	13225062	AgB01_g824_t01	+	beta-hexosaminidase a	AgB01	13270080	13270081	break_a01	+	45019	41.4	16.3	79.6	13.5	13.6	64.7	53	50.7	65.8	52.9	42.5	41.4	33.4	59.1	41.8	47.4	26.7	39	46	19.2	32.9	10.1	26.1	22.9	0.2
AgB17	1424684	1428565	AgB17_g089_t01	-	Long-chain-fatty-acid--CoA ligase 1, partial	AgB17	1474205	1474206	break_a21	+	45641	0.5	1.6	0.2	0	0	0.2	0.2	0.3	0	0.1	1	1.2	2.2	3.6	2	2.2	1.2	0.9	1.8	3	20	0.5	0.1	0	0
AgB18	125812	135176	AgB18_g008_t01	+	Vacuolar-sorting protein SNF8	AgB18	79674	79675	break_a22	-	46138	5.8	3.2	3.7	1.6	3.6	5.8	4.3	4.3	5	6.7	34.7	21.8	14	36	28.7	29	12.7	22.7	19.4	15.5	18.2	35.2	11.6	4.1	8.6
AgB10	124576	126364	AgB10_g006_t01	-	hypothetical protein	AgB10	77959	77960	break_a14	-	46617	0.1	0	0.2	0	0.2	0	0	0	0	0	0.5	0	0.8	0.2	0.6	0.9	0.8	0.4	0.1	1.2	1.9	21.5	23.7	16.9	0
AgB02	4782756	4803636	AgB02_g275_t02	+	putative v-type proton atpase subunit a	AgB02	4850627	4850628	break_a02	+	46992	0.4	0.3	21.4	0.3	0.8	0.6	0.6	0.5	0.2	2.5	17.1	10.2	4.3	6.7	11.4	6.5	2.1	3.5	4.6	4.9	6.3	25.1	5.8	6.3	0.5
AgB25	423554	434151	AgB25_g025_t16	+	Neurogenic differentiation factor 1	AgB25	481208	481209	break_a29	+	47058	3.8	1.5	2.3	0.3	0.5	11.2	81.4	75.7	4.8	78.8	464.1	601.5	1392.5	398.4	122.4	97.3	274.6	7.4	26.1	58.8	10.9	2	13	5.6	0.7
AgB11	90857	107295	AgB11_g006_t05	+	Protein KIAA0664	AgB11	43776	43777	break_a15	-	47081	61.1	49.6	33.5	10.5	15.9	64.5	34.7	37.7	15.3	2.9	19.6	24.5	36.7	48.1	40	30.8	22.3	20.1	13.4	11.1	13	15.9	9.1	16	2.1
AgB13X	2204778	2210482	AgB13X_g100_t02	+	hypothetical protein	AgB13X	2258386	2258387	break_a17	+	47905	1.3	0	0.7	0.8	0.2	0.8	0.5	0.6	0.4	0.2	1.2	0.9	0.9	0.4	0.8	0.7	1	0.6	0.6	0.4	4.7	0	1.6	0.6	0.5
AgB15X	110774	115910	AgB15X_g009_t02	-	Epoxide hydrolase 1	AgB15X	62768	62769	break_a19	-	48006	18.2	2.9	23.5	7.7	4.2	34.7	28.3	28.6	15.3	9.9	25.6	21.3	12.4	54.4	79.1	145.1	122	149.5	110.3	46.7	39.3	3	12.6	8.8	4.3
AgB23	1024476	1028426	AgB23_g065_t01	-	hypothetical protein	AgB23	1076444	1076445	break_a27	+	48019	0	0	0	0	0	0	0	0	0	0	0.1	0.1	0	0.2	0.8	0.4	0.1	0.2	0	0.1	0.6	44.6	1.5	6.3	0
AgB02	8003729	8012547	AgB02_g468_t03	-	histone-binding protein rbbp7	AgB02	8060588	8060589	break_a04	+	48042	30.5	8.4	16	20.5	11.9	44.8	21.4	21.5	12.2	12.3	44.5	45.8	48.8	97.3	120.1	147.9	119.3	187	188.4	66.5	65.8	31	31.3	22.7	24.6
AgB10	127244	140992	AgB10_g007_t01	-	Cuticle collagen lon-3	AgB10	77959	77960	break_a14	-	49285	8	6	6.6	7.8	3.5	15.4	13.3	13	6.9	16.8	37.5	40.4	50.1	32.2	27.3	23.4	22.8	18	14.4	10.8	10.4	21.1	7.9	5.7	8.2
