# Supplementary figures and images for: Comparative genome analysis of programmed DNA elimination in nematodes
Source: PubMed Central journal article supplement — Genome Res. 2017 Dec;27(12):2001–14. doi: 10.1101/gr.225730.117 (PMC5741062; doi:10.1101/gr.225730.117), 2017-12

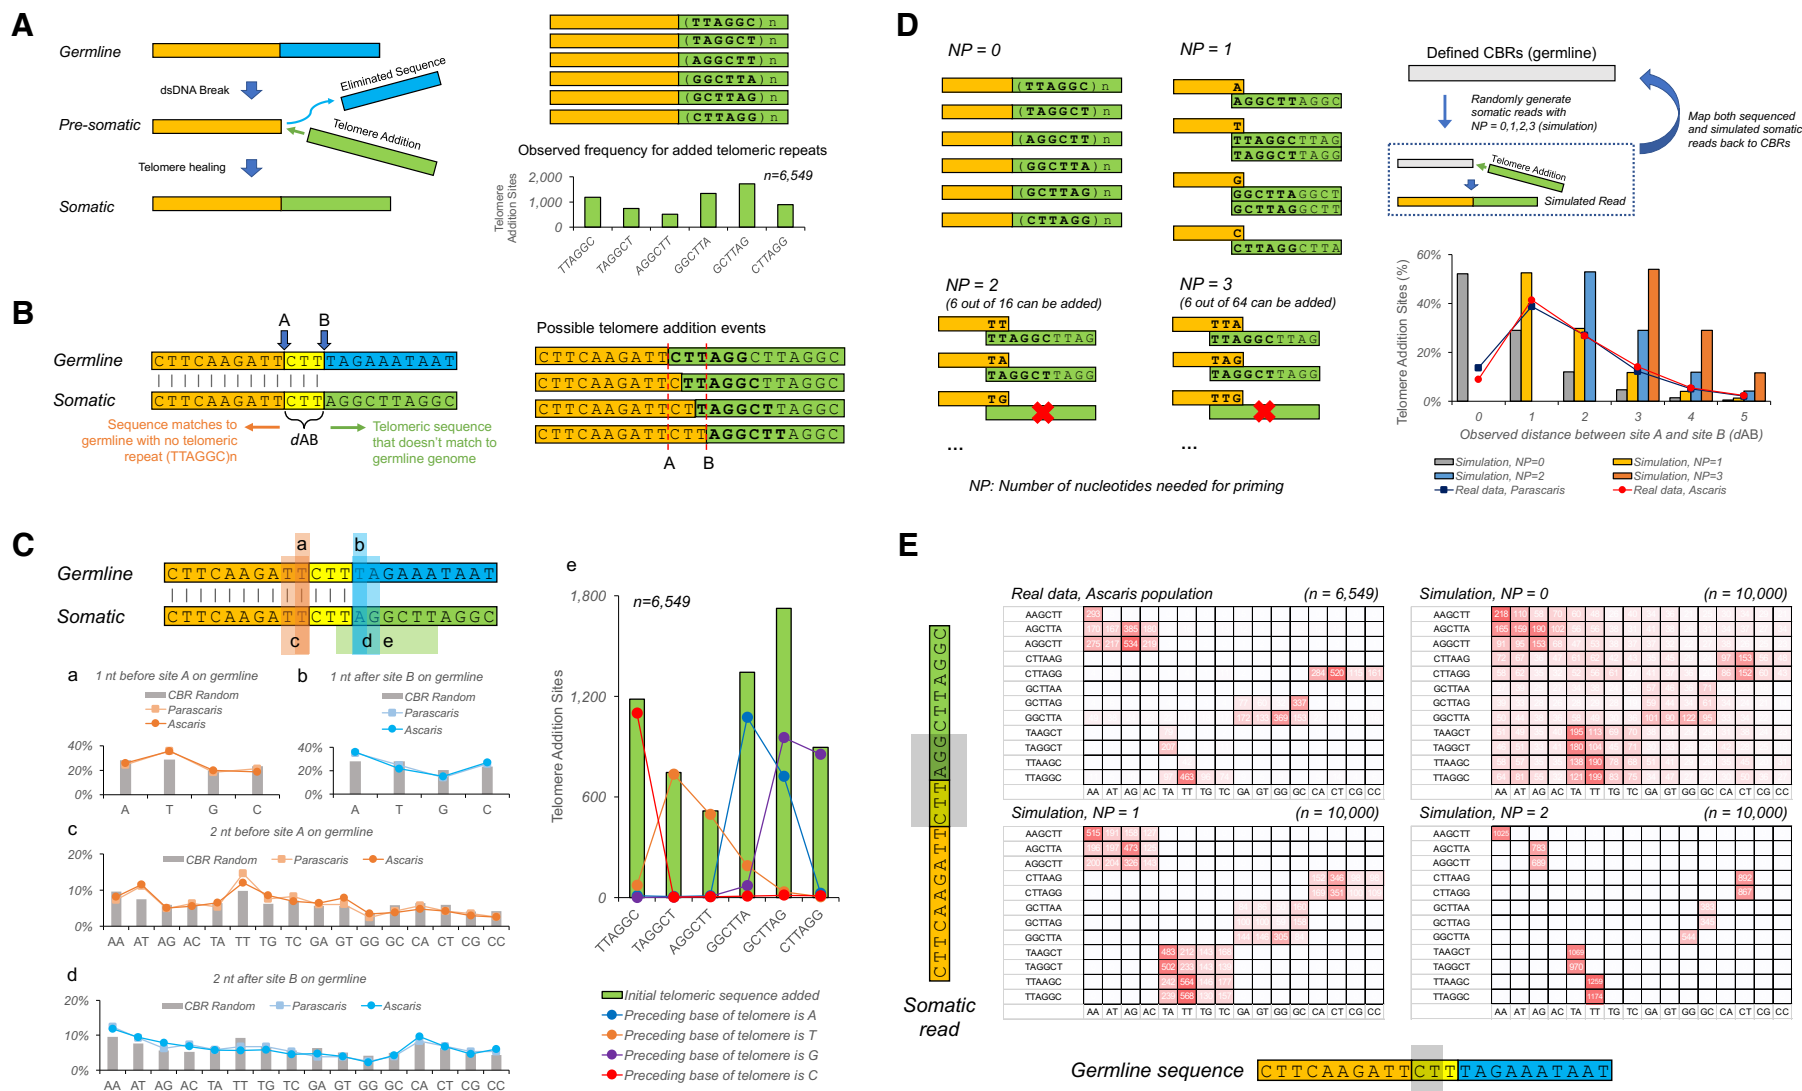

Supplement: supp_gr.225730.117_Supplemental_Fig_S11.pdf [file supp_gr.225730.117_Supplemental_Fig_S11.pdf]
